# Supplementary material for: Characteristics of water and heat change during the freezing-thawing process at an alpine steppe in seasonally frozen ground of the Northern Tibetan plateau
Source: Frontiers journal article supplement (doi:10.3389/fenvs.2024.1411704), 2024-06-20
Supplement: Table_1.XLSX [file Table_1.XLSX]

## Sheet: Sheet1
台站编号	台站名称	监测时间	监测深度(单位：cm)
			2.5cm	5cm	7.5cm	10cm	12.5cm	15cm	17.5cm	20cm	22.5cm	25cm	27.5cm	30cm	32.5cm	35cm	37.5cm	40cm	42.5cm	45cm	47.5cm	50cm	52.5cm	55cm	57.5cm	60cm	62.5cm	65cm	67.5cm	70cm	72.5cm	75cm	77.5cm	80cm
XZ009	申扎县	2019-11-01 16:00:00	5.1	5.4	5.5	5.6	5.6	5.6	5.5	5.3	5.3	5.3	5.3	5.3	5.4	5.4	5.3	5.3	5.3	5.5	5.5	5.7	5.6	5.5	5.5	5.6	6	5.8	5.8	6	6.1	6	6.1	6.3
XZ009	申扎县	2019-11-01 17:00:00	4.8	5.1	5.4	5.5	5.6	5.5	5.4	5.2	5.2	5.3	5.3	5.3	5.3	5.3	5.3	5.3	5.2	5.4	5.5	5.7	5.6	5.5	5.5	5.6	6	5.9	5.8	6	6	6	6.1	6.3
XZ009	申扎县	2019-11-01 18:00:00	4.2	4.5	4.8	5	5.2	5.2	5.1	5	5	5	5	5	5.1	5.2	5.1	5.2	5.1	5.3	5.5	5.6	5.5	5.5	5.5	5.5	6	5.8	5.8	6	6	6	6.1	6.3
XZ009	申扎县	2019-11-01 19:00:00	3.1	3.7	4.2	4.5	4.8	4.9	4.9	4.8	4.8	4.8	4.8	4.9	5	5	5	5.1	5	5.3	5.4	5.6	5.5	5.5	5.5	5.5	6	5.8	5.8	6	6	6	6.1	6.3
XZ009	申扎县	2019-11-01 20:00:00	2	2.7	3.3	3.9	4.4	4.6	4.6	4.6	4.6	4.7	4.7	4.8	4.8	5	5	5	5	5.2	5.3	5.6	5.5	5.5	5.5	5.5	6	5.8	5.8	5.9	6	6	6.1	6.3
XZ009	申扎县	2019-11-01 21:00:00	1.3	2	2.6	3.3	3.9	4.2	4.3	4.3	4.5	4.6	4.6	4.6	4.8	4.9	4.9	5	4.9	5.1	5.3	5.5	5.4	5.4	5.4	5.5	5.9	5.8	5.8	5.9	6	6	6.1	6.3
XZ009	申扎县	2019-11-01 22:00:00	0.8	1.5	2	2.7	3.5	3.9	4.1	4.1	4.3	4.4	4.4	4.5	4.6	4.8	4.8	5	4.9	5.1	5.3	5.5	5.4	5.4	5.4	5.5	5.9	5.8	5.7	5.8	6	5.9	6	6.2
XZ009	申扎县	2019-11-01 23:00:00	0.5	1.1	1.6	2.3	3.1	3.5	3.8	3.9	4.1	4.3	4.3	4.4	4.5	4.8	4.8	4.9	4.8	5.1	5.2	5.5	5.4	5.3	5.3	5.4	5.9	5.7	5.7	5.8	6	5.9	6	6.2
XZ009	申扎县	2019-11-02 00:00:00	0.2	0.8	1.3	2	2.8	3.3	3.5	3.6	3.9	4.1	4.1	4.3	4.5	4.7	4.7	4.8	4.8	5.1	5.2	5.5	5.3	5.3	5.4	5.4	5.9	5.7	5.7	5.8	5.9	5.9	6	6.3
XZ009	申扎县	2019-11-02 01:00:00	0	0.5	1.1	1.7	2.5	3	3.3	3.5	3.7	4	4	4.1	4.3	4.6	4.6	4.8	4.8	5	5.1	5.4	5.3	5.3	5.3	5.3	5.8	5.6	5.7	5.8	5.9	5.8	6	6.2
XZ009	申扎县	2019-11-02 02:00:00	-0.3	0.3	0.9	1.5	2.3	2.8	3.1	3.3	3.5	3.8	3.8	4	4.3	4.6	4.6	4.8	4.7	5	5.1	5.4	5.3	5.3	5.3	5.3	5.8	5.6	5.6	5.8	5.9	5.9	6	6.2
XZ009	申扎县	2019-11-02 03:00:00	-0.7	0.1	0.7	1.3	2.1	2.6	3	3.1	3.4	3.7	3.7	4	4.1	4.5	4.5	4.7	4.7	5	5.1	5.3	5.3	5.3	5.3	5.3	5.8	5.6	5.6	5.8	5.9	5.8	6	6.1
XZ009	申扎县	2019-11-02 04:00:00	-1.2	0	0.5	1.1	2	2.5	2.8	3	3.3	3.5	3.5	3.8	4	4.4	4.5	4.6	4.6	4.9	5.1	5.3	5.3	5.2	5.3	5.3	5.8	5.6	5.6	5.8	5.9	5.8	6	6.2
XZ009	申扎县	2019-11-02 05:00:00	-1.6	-0.3	0.3	1	1.8	2.3	2.6	2.8	3.1	3.4	3.4	3.7	4	4.3	4.4	4.6	4.6	4.9	5	5.3	5.2	5.2	5.2	5.3	5.8	5.6	5.6	5.8	5.8	5.8	6	6.1
XZ009	申扎县	2019-11-02 06:00:00	-2	-0.7	0.1	0.8	1.6	2.1	2.5	2.7	3	3.3	3.3	3.6	3.8	4.3	4.3	4.5	4.5	4.8	5	5.3	5.2	5.2	5.2	5.3	5.8	5.6	5.6	5.8	5.8	5.8	6	6.1
XZ009	申扎县	2019-11-02 07:00:00	-2.4	-1	0	0.6	1.5	2	2.3	2.6	2.9	3.2	3.2	3.5	3.8	4.2	4.3	4.5	4.5	4.8	5	5.2	5.1	5.1	5.2	5.3	5.7	5.6	5.6	5.7	5.8	5.8	6	6.1
XZ009	申扎县	2019-11-02 08:00:00	-2.9	-1.4	-0.2	0.5	1.3	1.9	2.2	2.5	2.7	3.1	3.1	3.4	3.6	4.1	4.2	4.4	4.5	4.7	4.9	5.2	5.1	5.1	5.1	5.2	5.7	5.6	5.6	5.7	5.8	5.8	6	6.1
XZ009	申扎县	2019-11-02 09:00:00	-3.2	-1.8	-0.5	0.2	1.1	1.7	2.1	2.3	2.6	3	3	3.3	3.5	4	4.1	4.3	4.4	4.7	4.9	5.1	5.1	5.1	5.1	5.2	5.7	5.6	5.6	5.7	5.8	5.8	5.9	6.1
XZ009	申扎县	2019-11-02 10:00:00	-1.7	-1.3	-0.6	0.1	1	1.6	2	2.1	2.5	2.8	2.8	3.1	3.5	4	4.1	4.3	4.3	4.6	4.8	5.1	5.1	5.1	5.1	5.2	5.6	5.5	5.5	5.6	5.8	5.8	5.9	6.1
XZ009	申扎县	2019-11-02 11:00:00	-0.4	-0.5	-0.2	0.1	1	1.5	1.8	2	2.3	2.7	2.7	3	3.3	3.8	4	4.2	4.3	4.6	4.8	5.1	5	5	5.1	5.1	5.6	5.5	5.5	5.6	5.8	5.7	5.9	6.1
XZ009	申扎县	2019-11-02 12:00:00	0.1	0	0	0.2	0.9	1.4	1.7	1.9	2.3	2.6	2.6	3	3.2	3.8	3.9	4.1	4.2	4.5	4.7	5	5	5	5	5.1	5.6	5.5	5.5	5.6	5.8	5.7	5.9	6.1
XZ009	申扎县	2019-11-02 13:00:00	1.2	0.1	0	0.3	1	1.3	1.6	1.8	2.1	2.5	2.5	2.8	3.1	3.7	3.8	4.1	4.1	4.5	4.7	5	5	5	5	5.1	5.6	5.5	5.5	5.6	5.7	5.7	5.8	6
XZ009	申扎县	2019-11-02 14:00:00	3.6	0.9	0.2	0.4	1	1.3	1.6	1.8	2.1	2.5	2.5	2.8	3.1	3.6	3.8	4	4.1	4.4	4.6	4.9	4.9	5	5	5.1	5.5	5.5	5.5	5.6	5.7	5.6	5.8	6
XZ009	申扎县	2019-11-02 15:00:00	5.9	3.2	1.3	0.7	1	1.4	1.6	1.7	2	2.4	2.4	2.7	3	3.5	3.7	4	4	4.3	4.6	4.8	4.8	4.9	5	5	5.5	5.4	5.4	5.6	5.7	5.6	5.8	6
XZ009	申扎县	2019-11-02 16:00:00	7.4	5.5	3.8	2.4	1.8	1.7	1.7	1.8	2	2.3	2.3	2.6	2.9	3.5	3.6	3.9	4	4.3	4.5	4.8	4.8	4.8	4.9	5	5.5	5.4	5.4	5.5	5.6	5.6	5.8	6
XZ009	申扎县	2019-11-02 17:00:00	7	6	5	3.9	3.1	2.6	2.3	2.1	2.2	2.5	2.5	2.6	2.9	3.5	3.6	3.8	3.9	4.3	4.5	4.8	4.8	4.8	4.8	5	5.5	5.3	5.4	5.5	5.6	5.6	5.8	6
XZ009	申扎县	2019-11-02 18:00:00	5.7	5.5	5.1	4.4	3.8	3.3	2.9	2.6	2.6	2.7	2.7	2.8	3	3.4	3.6	3.8	3.8	4.2	4.4	4.7	4.7	4.8	4.8	4.9	5.5	5.3	5.3	5.5	5.6	5.6	5.8	6
XZ009	申扎县	2019-11-02 19:00:00	4.3	4.6	4.5	4.3	4	3.6	3.3	3	3	3	3	3	3.1	3.5	3.6	3.8	3.8	4.2	4.4	4.7	4.6	4.7	4.8	4.9	5.4	5.3	5.3	5.5	5.6	5.6	5.7	5.9
XZ009	申扎县	2019-11-02 20:00:00	2.5	3.1	3.6	3.8	3.9	3.7	3.5	3.3	3.2	3.2	3.2	3.3	3.3	3.6	3.6	3.8	3.8	4.1	4.3	4.6	4.6	4.7	4.7	4.8	5.3	5.3	5.3	5.5	5.6	5.5	5.7	5.9
XZ009	申扎县	2019-11-02 21:00:00	1.4	2.1	2.6	3	3.5	3.6	3.5	3.4	3.3	3.4	3.4	3.4	3.5	3.6	3.7	3.9	3.9	4.1	4.4	4.6	4.6	4.6	4.7	4.8	5.3	5.2	5.3	5.4	5.5	5.5	5.6	5.9
XZ009	申扎县	2019-11-02 22:00:00	1	1.5	2	2.5	3.1	3.3	3.4	3.3	3.4	3.5	3.5	3.5	3.6	3.8	3.8	4	3.9	4.2	4.4	4.6	4.6	4.6	4.7	4.8	5.3	5.2	5.2	5.4	5.5	5.5	5.6	5.8
XZ009	申扎县	2019-11-02 23:00:00	0.6	1.1	1.7	2.2	2.8	3.1	3.2	3.3	3.3	3.5	3.5	3.6	3.6	3.8	3.8	4	4	4.2	4.4	4.6	4.6	4.6	4.7	4.8	5.3	5.2	5.2	5.4	5.5	5.5	5.6	5.8
XZ009	申扎县	2019-11-03 00:00:00	0.4	0.9	1.4	1.9	2.5	2.9	3.1	3.1	3.3	3.5	3.5	3.6	3.7	3.9	3.9	4	4	4.3	4.5	4.6	4.6	4.6	4.7	4.8	5.3	5.1	5.2	5.3	5.5	5.5	5.6	5.8
XZ009	申扎县	2019-11-03 01:00:00	0.2	0.7	1.1	1.7	2.3	2.7	3	3	3.2	3.4	3.4	3.5	3.6	3.9	4	4.1	4	4.3	4.5	4.7	4.6	4.6	4.7	4.8	5.3	5.1	5.2	5.3	5.5	5.5	5.6	5.8
XZ009	申扎县	2019-11-03 02:00:00	0.1	0.6	1	1.5	2.1	2.6	2.8	2.9	3.1	3.3	3.3	3.5	3.6	3.9	4	4.1	4.1	4.3	4.5	4.7	4.7	4.7	4.7	4.8	5.3	5.1	5.2	5.3	5.5	5.5	5.6	5.8
XZ009	申扎县	2019-11-03 03:00:00	0	0.5	0.8	1.3	2	2.5	2.7	2.8	3	3.3	3.3	3.5	3.6	4	4	4.1	4.1	4.3	4.5	4.8	4.7	4.7	4.7	4.8	5.3	5.1	5.1	5.3	5.5	5.4	5.6	5.8
XZ009	申扎县	2019-11-03 04:00:00	-0.2	0.3	0.7	1.3	1.9	2.3	2.6	2.7	3	3.2	3.2	3.4	3.6	3.9	4	4.1	4.1	4.4	4.5	4.8	4.7	4.7	4.7	4.8	5.3	5.1	5.1	5.3	5.4	5.4	5.6	5.8
XZ009	申扎县	2019-11-03 05:00:00	-0.5	0.1	0.6	1.1	1.8	2.2	2.5	2.6	2.8	3.1	3.1	3.3	3.6	3.9	4	4.1	4.1	4.4	4.5	4.8	4.7	4.7	4.7	4.8	5.3	5.1	5.1	5.3	5.4	5.4	5.6	5.8
XZ009	申扎县	2019-11-03 06:00:00	-0.9	0	0.5	1	1.7	2.1	2.4	2.5	2.8	3.1	3.1	3.3	3.5	3.9	4	4.1	4.1	4.4	4.5	4.8	4.7	4.7	4.7	4.8	5.3	5.1	5.2	5.3	5.4	5.4	5.6	5.8
XZ009	申扎县	2019-11-03 07:00:00	-1.4	-0.2	0.3	0.9	1.5	2	2.3	2.4	2.7	3	3	3.3	3.5	3.8	3.9	4.1	4.1	4.4	4.5	4.8	4.7	4.7	4.7	4.8	5.3	5.1	5.1	5.3	5.4	5.4	5.5	5.8
XZ009	申扎县	2019-11-03 08:00:00	-1.7	-0.4	0.2	0.8	1.4	1.9	2.1	2.3	2.6	2.9	2.9	3.1	3.4	3.8	3.8	4	4	4.3	4.5	4.8	4.7	4.7	4.7	4.8	5.3	5.1	5.1	5.3	5.4	5.4	5.5	5.7
XZ009	申扎县	2019-11-03 09:00:00	-1.9	-0.7	0	0.6	1.3	1.8	2.1	2.2	2.5	2.8	2.8	3.1	3.3	3.8	3.8	4	4	4.3	4.5	4.8	4.7	4.7	4.7	4.8	5.3	5.1	5.1	5.3	5.4	5.4	5.5	5.7
XZ009	申扎县	2019-11-03 10:00:00	-0.6	-0.4	0	0.5	1.2	1.7	2	2.1	2.5	2.8	2.8	3	3.3	3.7	3.8	4	4	4.3	4.5	4.8	4.7	4.7	4.7	4.8	5.3	5.1	5.1	5.3	5.4	5.4	5.5	5.8
XZ009	申扎县	2019-11-03 11:00:00	0.1	0	0.1	0.5	1.1	1.6	1.9	2	2.3	2.7	2.7	3	3.2	3.6	3.8	4	4	4.3	4.5	4.7	4.6	4.7	4.7	4.8	5.3	5.1	5.1	5.3	5.4	5.4	5.5	5.7
XZ009	申扎县	2019-11-03 12:00:00	1	0.1	0.2	0.5	1.1	1.5	1.8	2	2.3	2.6	2.6	2.9	3.1	3.6	3.7	3.9	3.9	4.3	4.5	4.7	4.6	4.6	4.7	4.8	5.3	5.1	5.1	5.3	5.4	5.3	5.5	5.7
XZ009	申扎县	2019-11-03 13:00:00	3.6	1	0.3	0.6	1.1	1.5	1.8	1.9	2.2	2.5	2.5	2.8	3.1	3.5	3.6	3.8	3.9	4.2	4.4	4.7	4.6	4.6	4.7	4.8	5.2	5.1	5.1	5.3	5.4	5.4	5.5	5.7
XZ009	申扎县	2019-11-03 14:00:00	4.6	3.1	1.9	1.3	1.3	1.5	1.8	1.9	2.1	2.5	2.5	2.8	3	3.5	3.6	3.8	3.8	4.1	4.3	4.6	4.6	4.6	4.6	4.8	5.2	5.1	5.1	5.3	5.3	5.3	5.5	5.7
XZ009	申扎县	2019-11-03 15:00:00	6.7	5.1	3.8	2.8	2.4	2.1	2.1	2	2.2	2.5	2.5	2.7	3	3.5	3.6	3.8	3.8	4.1	4.3	4.6	4.6	4.6	4.6	4.7	5.2	5.1	5.1	5.3	5.3	5.3	5.5	5.7
XZ009	申扎县	2019-11-03 16:00:00	6.8	5.9	5	4.1	3.5	3	2.6	2.4	2.5	2.6	2.6	2.8	3	3.4	3.5	3.7	3.8	4.1	4.3	4.6	4.5	4.6	4.6	4.7	5.2	5.1	5.1	5.2	5.3	5.3	5.5	5.6
XZ009	申扎县	2019-11-03 17:00:00	6.5	6	5.3	4.6	4.1	3.6	3.1	2.8	2.8	2.8	2.8	3	3.1	3.4	3.5	3.7	3.8	4.1	4.3	4.5	4.5	4.5	4.6	4.7	5.2	5.1	5.1	5.2	5.3	5.3	5.5	5.6
XZ009	申扎县	2019-11-03 18:00:00	5.7	5.6	5.2	4.8	4.4	4	3.6	3.3	3.1	3.1	3.1	3.1	3.2	3.5	3.5	3.7	3.7	4.1	4.3	4.5	4.5	4.5	4.6	4.6	5.1	5	5.1	5.2	5.3	5.3	5.5	5.6
XZ009	申扎县	2019-11-03 20:00:00	3.4	3.9	4.1	4.2	4.3	4.2	4	3.7	3.6	3.6	3.6	3.5	3.6	3.7	3.6	3.8	3.8	4.1	4.3	4.5	4.5	4.5	4.5	4.6	5.1	5	5	5.2	5.3	5.3	5.4	5.6
XZ009	申扎县	2019-11-03 21:00:00	2.3	3	3.4	3.7	4	4	4	3.8	3.7	3.7	3.7	3.7	3.7	3.8	3.8	3.9	3.9	4.1	4.3	4.6	4.5	4.5	4.5	4.6	5.1	5	5	5.1	5.3	5.3	5.4	5.6
XZ009	申扎县	2019-11-03 22:00:00	1.6	2.2	2.7	3.1	3.6	3.8	3.8	3.7	3.7	3.8	3.8	3.8	3.8	3.9	3.8	4	3.9	4.2	4.3	4.6	4.5	4.5	4.5	4.6	5.1	5	5	5.1	5.3	5.3	5.4	5.6
XZ009	申扎县	2019-11-03 23:00:00	1	1.6	2.1	2.7	3.3	3.5	3.6	3.6	3.7	3.8	3.8	3.8	3.9	4	4	4	4	4.3	4.3	4.6	4.5	4.5	4.5	4.6	5.1	5	5	5.1	5.3	5.2	5.4	5.6
XZ009	申扎县	2019-11-04 00:00:00	0.8	1.3	1.8	2.3	3	3.3	3.5	3.5	3.6	3.8	3.8	3.8	3.9	4	4	4.1	4	4.3	4.4	4.6	4.6	4.6	4.6	4.6	5.1	5	5	5.1	5.3	5.2	5.4	5.6
XZ009	申扎县	2019-11-04 01:00:00	0.6	1	1.6	2	2.7	3.1	3.3	3.3	3.5	3.6	3.6	3.8	3.9	4.1	4	4.1	4.1	4.3	4.5	4.6	4.6	4.6	4.6	4.6	5.1	5	5	5.1	5.2	5.2	5.4	5.6
XZ009	申扎县	2019-11-04 02:00:00	0.5	0.9	1.4	1.8	2.5	2.9	3.1	3.2	3.4	3.6	3.6	3.8	3.9	4	4.1	4.1	4.1	4.3	4.5	4.7	4.6	4.6	4.6	4.6	5.1	5	5	5.1	5.3	5.2	5.4	5.6
XZ009	申扎县	2019-11-04 03:00:00	0.3	0.8	1.2	1.7	2.3	2.7	3	3.1	3.3	3.5	3.5	3.6	3.8	4.1	4	4.2	4.1	4.4	4.5	4.7	4.6	4.6	4.6	4.7	5.1	5	5	5.1	5.3	5.2	5.4	5.6
XZ009	申扎县	2019-11-04 04:00:00	0.1	0.6	1.1	1.6	2.2	2.6	2.8	3	3.2	3.5	3.5	3.6	3.8	4	4.1	4.2	4.1	4.4	4.5	4.8	4.6	4.6	4.6	4.7	5.1	5	5	5.1	5.3	5.2	5.3	5.6
XZ009	申扎县	2019-11-04 05:00:00	0	0.5	1	1.5	2.1	2.5	2.7	2.9	3.1	3.3	3.3	3.6	3.7	4	4	4.1	4.1	4.4	4.5	4.8	4.6	4.6	4.6	4.7	5.1	5	5	5.1	5.3	5.2	5.4	5.6
XZ009	申扎县	2019-11-04 06:00:00	-0.2	0.3	0.8	1.3	2	2.3	2.6	2.8	3	3.3	3.3	3.5	3.6	4	4	4.1	4.1	4.4	4.5	4.8	4.7	4.6	4.6	4.7	5.2	5	5	5.1	5.3	5.2	5.3	5.6
XZ009	申扎县	2019-11-04 07:00:00	-0.3	0.2	0.7	1.2	1.8	2.3	2.5	2.7	2.9	3.2	3.2	3.4	3.6	4	4	4.1	4.1	4.4	4.5	4.8	4.7	4.6	4.6	4.7	5.1	5	5	5.1	5.3	5.2	5.4	5.6
XZ009	申扎县	2019-11-04 08:00:00	-0.4	0.1	0.6	1.1	1.7	2.1	2.4	2.6	2.8	3.1	3.1	3.3	3.5	3.9	4	4.1	4.1	4.4	4.5	4.8	4.7	4.6	4.6	4.7	5.1	5	5.1	5.1	5.3	5.2	5.4	5.6
XZ009	申扎县	2019-11-04 09:00:00	-0.4	0.1	0.5	1	1.6	2	2.3	2.5	2.8	3.1	3.1	3.3	3.5	3.8	3.9	4.1	4.1	4.4	4.5	4.8	4.7	4.6	4.6	4.7	5.2	5.1	5	5.1	5.3	5.3	5.4	5.6
XZ009	申扎县	2019-11-04 10:00:00	0	0.1	0.5	0.9	1.5	2	2.3	2.4	2.6	3	3	3.2	3.5	3.8	3.9	4.1	4.1	4.3	4.5	4.8	4.6	4.6	4.6	4.8	5.2	5	5.1	5.2	5.3	5.2	5.4	5.6
XZ009	申扎县	2019-11-04 11:00:00	0.3	0.3	0.5	0.9	1.5	1.9	2.1	2.3	2.6	2.9	2.9	3.1	3.4	3.8	3.8	4	4	4.3	4.5	4.7	4.6	4.6	4.6	4.7	5.2	5	5	5.1	5.3	5.2	5.4	5.6
XZ009	申扎县	2019-11-04 12:00:00	0.6	0.3	0.6	0.9	1.5	1.8	2.1	2.3	2.5	2.8	2.8	3.1	3.3	3.7	3.8	4	4	4.3	4.5	4.7	4.6	4.6	4.6	4.7	5.2	5	5	5.1	5.3	5.2	5.4	5.6
XZ009	申扎县	2019-11-04 13:00:00	1	0.5	0.6	1	1.5	1.8	2.1	2.2	2.5	2.8	2.8	3	3.2	3.6	3.8	4	4	4.3	4.5	4.7	4.6	4.6	4.6	4.7	5.2	5	5	5.1	5.3	5.2	5.4	5.5
XZ009	申扎县	2019-11-04 14:00:00	4.3	2.8	2	1.6	1.8	2	2.1	2.2	2.5	2.7	2.7	3	3.2	3.6	3.7	3.9	3.9	4.3	4.4	4.6	4.6	4.6	4.6	4.7	5.2	5	5	5.1	5.3	5.2	5.4	5.6
XZ009	申扎县	2019-11-04 15:00:00	5	4.2	3.5	2.9	2.6	2.5	2.4	2.4	2.5	2.8	2.8	3	3.1	3.6	3.7	3.9	3.9	4.2	4.4	4.6	4.6	4.6	4.6	4.7	5.1	5	5	5.1	5.3	5.2	5.3	5.5
XZ009	申扎县	2019-11-04 16:00:00	6	5.1	4.4	3.7	3.3	3	2.8	2.6	2.7	2.9	2.9	3	3.2	3.6	3.6	3.8	3.8	4.2	4.3	4.6	4.6	4.6	4.6	4.6	5.1	5	5	5.1	5.3	5.2	5.3	5.6
XZ009	申扎县	2019-11-04 17:00:00	5.9	5.5	5	4.3	4	3.6	3.3	3	3	3.1	3.1	3.1	3.3	3.6	3.6	3.8	3.8	4.1	4.3	4.6	4.6	4.5	4.6	4.6	5.1	5	5	5.1	5.3	5.2	5.3	5.6
XZ009	申扎县	2019-11-04 18:00:00	5.2	5.2	4.9	4.5	4.3	4	3.6	3.3	3.3	3.3	3.3	3.3	3.4	3.6	3.7	3.8	3.8	4.1	4.3	4.6	4.5	4.6	4.6	4.6	5.1	5	5	5.1	5.2	5.2	5.4	5.5
XZ009	申扎县	2019-11-04 19:00:00	4.3	4.5	4.5	4.4	4.3	4.1	3.8	3.6	3.5	3.5	3.5	3.5	3.6	3.7	3.8	3.9	3.9	4.1	4.3	4.6	4.5	4.5	4.6	4.6	5.1	5	5	5.1	5.2	5.1	5.3	5.5
XZ009	申扎县	2019-11-04 20:00:00	2.8	3.5	3.8	4	4.1	4.1	4	3.7	3.6	3.6	3.6	3.6	3.7	3.8	3.8	4	3.9	4.2	4.3	4.6	4.5	4.5	4.5	4.6	5.1	5	5	5.1	5.2	5.2	5.3	5.5
XZ009	申扎县	2019-11-04 21:00:00	1.7	2.4	3	3.4	3.8	3.9	3.9	3.8	3.7	3.8	3.8	3.8	3.8	3.9	3.9	4	4	4.2	4.3	4.6	4.5	4.5	4.5	4.6	5.1	5	5	5.1	5.2	5.2	5.3	5.5
XZ009	申扎县	2019-11-04 22:00:00	1	1.7	2.3	2.8	3.4	3.6	3.7	3.6	3.7	3.8	3.8	3.8	3.9	4	4	4	4	4.3	4.4	4.6	4.5	4.5	4.5	4.6	5.1	5	5	5.1	5.2	5.1	5.3	5.5
XZ009	申扎县	2019-11-04 23:00:00	0.6	1.3	1.8	2.4	3	3.3	3.5	3.6	3.6	3.8	3.8	3.8	3.9	4	4	4.1	4	4.3	4.5	4.6	4.6	4.6	4.6	4.6	5.1	5	5	5.1	5.2	5.1	5.3	5.5
XZ009	申扎县	2019-11-05 00:00:00	0.6	1.1	1.6	2.1	2.7	3.1	3.3	3.4	3.5	3.7	3.7	3.8	3.9	4.1	4.1	4.1	4.1	4.3	4.5	4.7	4.6	4.6	4.6	4.6	5.1	5	5	5.1	5.2	5.1	5.3	5.5
XZ009	申扎县	2019-11-05 01:00:00	0.5	1	1.5	1.9	2.5	3	3.1	3.3	3.5	3.6	3.6	3.8	3.9	4.1	4.1	4.2	4.1	4.3	4.5	4.7	4.6	4.6	4.6	4.6	5.1	5	5	5.1	5.2	5.1	5.3	5.5
XZ009	申扎县	2019-11-05 02:00:00	0.3	0.8	1.3	1.8	2.4	2.8	3	3.1	3.3	3.5	3.5	3.7	3.8	4.1	4.1	4.2	4.1	4.4	4.5	4.7	4.6	4.6	4.6	4.6	5.1	5	5	5.1	5.2	5.1	5.3	5.5
XZ009	申扎县	2019-11-05 03:00:00	0.1	0.6	1.1	1.6	2.2	2.6	2.9	3	3.2	3.5	3.5	3.6	3.8	4	4.1	4.2	4.1	4.4	4.5	4.8	4.6	4.6	4.6	4.6	5.1	5	5	5.1	5.1	5.2	5.3	5.5
XZ009	申扎县	2019-11-05 04:00:00	0	0.5	1	1.5	2.1	2.5	2.8	2.9	3.1	3.4	3.4	3.6	3.8	4	4	4.2	4.1	4.4	4.5	4.8	4.6	4.6	4.6	4.6	5.1	5	5	5.1	5.2	5.1	5.3	5.5
XZ009	申扎县	2019-11-05 05:00:00	0	0.4	0.8	1.3	2	2.4	2.6	2.8	3	3.3	3.3	3.5	3.7	4	4	4.2	4.1	4.4	4.5	4.8	4.7	4.6	4.6	4.7	5.1	5	5	5.1	5.2	5.1	5.3	5.5
XZ009	申扎县	2019-11-05 06:00:00	-0.4	0.2	0.7	1.2	1.8	2.3	2.5	2.6	3	3.2	3.2	3.5	3.6	4	4	4.1	4.1	4.4	4.5	4.8	4.6	4.6	4.6	4.7	5.1	5	5	5.1	5.2	5.1	5.3	5.5
XZ009	申扎县	2019-11-05 07:00:00	-0.8	0	0.6	1.1	1.7	2.1	2.5	2.6	2.8	3.1	3.1	3.4	3.6	3.9	4	4.1	4.1	4.4	4.5	4.8	4.6	4.6	4.6	4.7	5.1	5	5	5.1	5.2	5.1	5.3	5.5
XZ009	申扎县	2019-11-05 08:00:00	-1	0	0.4	1	1.6	2	2.3	2.5	2.8	3.1	3.1	3.3	3.5	3.9	4	4.1	4.1	4.3	4.5	4.8	4.6	4.6	4.6	4.7	5.1	5	5	5.1	5.2	5.1	5.3	5.5
XZ009	申扎县	2019-11-05 09:00:00	-1.2	-0.2	0.3	0.8	1.5	2	2.2	2.4	2.7	3	3	3.2	3.5	3.8	3.9	4.1	4.1	4.3	4.5	4.7	4.6	4.6	4.6	4.7	5.1	5	5	5.1	5.2	5.1	5.3	5.5
XZ009	申扎县	2019-11-05 10:00:00	-0.7	-0.2	0.2	0.7	1.4	1.8	2.1	2.3	2.6	2.9	2.9	3.1	3.4	3.8	3.9	4	4	4.3	4.5	4.7	4.6	4.6	4.6	4.7	5.1	5	5	5.1	5.2	5.2	5.3	5.5
XZ009	申扎县	2019-11-05 11:00:00	0	0	0.3	0.7	1.3	1.8	2	2.3	2.5	2.8	2.8	3.1	3.3	3.7	3.8	4	4	4.3	4.5	4.7	4.6	4.6	4.6	4.7	5.1	5	5	5.1	5.2	5.1	5.3	5.5
XZ009	申扎县	2019-11-05 12:00:00	0.5	0.1	0.3	0.7	1.3	1.7	2	2.1	2.4	2.8	2.8	3	3.2	3.6	3.8	4	4	4.3	4.4	4.6	4.6	4.6	4.6	4.6	5.1	5	5	5.1	5.2	5.1	5.3	5.5
XZ009	申扎县	2019-11-05 13:00:00	1.2	0.3	0.4	0.7	1.3	1.6	2	2.1	2.3	2.6	2.6	3	3.1	3.6	3.7	3.9	3.9	4.2	4.4	4.6	4.6	4.6	4.6	4.6	5.1	5	5	5.1	5.2	5.1	5.3	5.5
XZ009	申扎县	2019-11-05 14:00:00	3.1	1.7	1	0.9	1.3	1.6	1.9	2	2.3	2.6	2.6	2.9	3.1	3.6	3.6	3.9	3.9	4.2	4.3	4.6	4.6	4.6	4.6	4.6	5.1	5	5	5.1	5.2	5.1	5.3	5.5
XZ009	申扎县	2019-11-05 15:00:00	4.4	3.3	2.6	2.1	2.1	2.1	2.1	2.1	2.3	2.6	2.6	2.8	3.1	3.5	3.6	3.8	3.8	4.1	4.3	4.6	4.5	4.5	4.5	4.6	5.1	5	5	5.1	5.2	5.1	5.3	5.5
XZ009	申扎县	2019-11-05 16:00:00	6.1	5.1	4.1	3.3	3	2.6	2.5	2.3	2.5	2.6	2.6	2.8	3.1	3.5	3.6	3.8	3.8	4.1	4.3	4.6	4.5	4.5	4.5	4.6	5.1	5	5	5.1	5.2	5.1	5.3	5.5
XZ009	申扎县	2019-11-05 17:00:00	6.5	5.8	5	4.3	3.8	3.3	3	2.8	2.8	2.8	2.8	3	3.1	3.5	3.6	3.8	3.8	4.1	4.3	4.5	4.5	4.5	4.5	4.6	5.1	5	5	5.1	5.1	5.1	5.3	5.5
XZ009	申扎县	2019-11-05 18:00:00	6	5.8	5.3	4.8	4.3	3.9	3.5	3.1	3.1	3.1	3.1	3.1	3.3	3.5	3.6	3.8	3.8	4.1	4.3	4.5	4.5	4.5	4.5	4.6	5	4.9	5	5.1	5.1	5.1	5.3	5.5
XZ009	申扎县	2019-11-05 19:00:00	4.5	4.9	4.9	4.7	4.5	4.2	3.8	3.5	3.4	3.4	3.4	3.4	3.4	3.6	3.6	3.8	3.8	4.1	4.2	4.5	4.5	4.5	4.5	4.6	5	4.9	5	5	5.1	5.1	5.3	5.5
XZ009	申扎县	2019-11-05 20:00:00	2.5	3.3	3.8	4.1	4.3	4.1	4	3.7	3.6	3.6	3.6	3.6	3.6	3.7	3.7	3.8	3.8	4.1	4.3	4.5	4.5	4.5	4.5	4.6	5	4.9	4.9	5	5.1	5.1	5.3	5.5
XZ009	申扎县	2019-11-05 21:00:00	1.1	2	2.8	3.3	3.8	3.9	3.8	3.8	3.7	3.7	3.7	3.7	3.8	3.8	3.8	3.9	3.8	4.1	4.3	4.5	4.5	4.5	4.5	4.5	5	4.9	4.9	5	5.1	5.1	5.3	5.5
XZ009	申扎县	2019-11-05 22:00:00	0.4	1.3	2	2.6	3.2	3.5	3.6	3.6	3.6	3.7	3.7	3.8	3.8	3.9	3.9	4	3.9	4.1	4.3	4.5	4.5	4.5	4.5	4.5	5	4.9	4.9	5	5.1	5.1	5.2	5.5
XZ009	申扎县	2019-11-05 23:00:00	0	0.8	1.5	2.1	2.8	3.2	3.4	3.5	3.5	3.7	3.7	3.8	3.8	4	3.9	4	4	4.2	4.3	4.6	4.5	4.5	4.5	4.5	5	4.8	4.9	5	5.1	5.1	5.3	5.5
XZ009	申扎县	2019-11-06 00:00:00	-0.4	0.5	1.1	1.8	2.5	2.9	3.1	3.3	3.4	3.6	3.6	3.7	3.8	4	4	4.1	4	4.3	4.4	4.6	4.5	4.5	4.5	4.5	5	4.9	4.9	5	5.1	5.1	5.2	5.4
XZ009	申扎县	2019-11-06 01:00:00	-0.9	0.1	0.8	1.5	2.1	2.6	3	3.1	3.3	3.5	3.5	3.6	3.8	4	4	4.1	4	4.3	4.4	4.6	4.5	4.5	4.5	4.5	5	4.8	4.9	5	5.1	5	5.2	5.4
XZ009	申扎县	2019-11-06 02:00:00	-1.3	0	0.6	1.2	2	2.5	2.8	2.9	3.1	3.4	3.4	3.6	3.7	4	4	4.1	4	4.3	4.4	4.6	4.6	4.5	4.5	4.6	5.1	4.8	4.9	5	5.1	5.1	5.2	5.4
XZ009	申扎县	2019-11-06 03:00:00	-1.8	-0.3	0.3	1	1.8	2.3	2.6	2.8	3	3.3	3.3	3.5	3.6	4	4	4.1	4	4.3	4.4	4.6	4.5	4.5	4.5	4.6	5	4.9	4.9	5	5.1	5.1	5.2	5.4
XZ009	申扎县	2019-11-06 04:00:00	-2.3	-0.7	0.1	0.8	1.5	2.1	2.4	2.6	2.9	3.2	3.2	3.4	3.6	3.9	4	4.1	4	4.3	4.5	4.6	4.6	4.6	4.6	4.6	5	4.9	4.9	5	5.1	5.1	5.2	5.4
XZ009	申扎县	2019-11-06 05:00:00	-2.7	-1.1	0	0.6	1.4	1.9	2.2	2.5	2.8	3	3	3.3	3.5	3.8	3.9	4.1	4	4.3	4.5	4.6	4.6	4.6	4.5	4.6	5.1	4.9	4.9	5	5.1	5.1	5.2	5.4
XZ009	申扎县	2019-11-06 06:00:00	-3.2	-1.4	-0.2	0.5	1.2	1.8	2.1	2.3	2.6	2.9	2.9	3.2	3.4	3.8	3.8	4	4	4.3	4.4	4.6	4.6	4.5	4.5	4.6	5.1	4.9	4.9	5	5.1	5.1	5.2	5.4
XZ009	申扎县	2019-11-06 07:00:00	-3.7	-1.9	-0.5	0.3	1	1.6	2	2.1	2.5	2.8	2.8	3.1	3.3	3.7	3.8	4	4	4.2	4.4	4.6	4.6	4.5	4.5	4.6	5.1	4.9	4.9	5	5.1	5	5.2	5.4
XZ009	申扎县	2019-11-06 08:00:00	-4.2	-2.4	-0.9	0	0.9	1.5	1.8	2	2.4	2.7	2.7	3	3.2	3.6	3.8	4	3.9	4.2	4.3	4.6	4.6	4.5	4.5	4.6	5	4.9	4.9	5	5.1	5	5.2	5.4
XZ009	申扎县	2019-11-06 09:00:00	-4.5	-2.8	-1.2	0	0.7	1.3	1.6	1.9	2.3	2.6	2.6	2.8	3.1	3.6	3.6	3.9	3.9	4.2	4.3	4.6	4.5	4.5	4.5	4.6	5	4.9	4.9	5	5.1	5.1	5.2	5.4
XZ009	申扎县	2019-11-06 10:00:00	-2.7	-2.2	-1.3	-0.2	0.5	1.1	1.5	1.8	2.1	2.5	2.5	2.8	3	3.5	3.6	3.8	3.8	4.1	4.3	4.6	4.5	4.5	4.5	4.6	5	4.9	4.9	5	5.1	5	5.2	5.4
XZ009	申扎县	2019-11-06 11:00:00	-0.6	-1	-0.7	-0.2	0.5	1	1.4	1.6	2	2.3	2.3	2.6	3	3.5	3.5	3.8	3.8	4.1	4.3	4.5	4.5	4.5	4.5	4.6	5	4.9	4.9	5	5.1	5.1	5.2	5.4
XZ009	申扎县	2019-11-06 12:00:00	0.5	-0.2	-0.3	0	0.5	1	1.3	1.5	1.9	2.3	2.3	2.6	2.8	3.3	3.5	3.7	3.7	4.1	4.2	4.5	4.5	4.5	4.5	4.5	5	4.9	4.9	5	5.1	5.1	5.2	5.4
XZ009	申扎县	2019-11-06 13:00:00	2.8	0.3	0	0	0.5	1	1.3	1.5	1.8	2.1	2.1	2.5	2.8	3.3	3.4	3.6	3.6	4	4.2	4.5	4.4	4.5	4.5	4.5	5	4.8	4.8	5	5.1	5.1	5.2	5.4
XZ009	申扎县	2019-11-06 14:00:00	5.1	2.1	0.3	0.1	0.6	1	1.2	1.5	1.7	2.1	2.1	2.4	2.6	3.3	3.3	3.6	3.6	4	4.1	4.4	4.4	4.4	4.4	4.5	5	4.8	4.8	5	5.1	5	5.2	5.3
XZ009	申扎县	2019-11-06 15:00:00	6.3	3.8	1.6	0.3	0.6	1	1.2	1.4	1.7	2	2	2.3	2.6	3.1	3.3	3.5	3.6	3.9	4.1	4.4	4.3	4.3	4.4	4.5	5	4.8	4.8	5	5	5	5.2	5.4
XZ009	申扎县	2019-11-06 16:00:00	7.1	5.2	3.5	2.1	1.5	1.3	1.3	1.4	1.6	2	2	2.3	2.6	3.1	3.2	3.5	3.5	3.8	4	4.3	4.3	4.3	4.3	4.5	5	4.8	4.8	5	5	5	5.1	5.3
XZ009	申扎县	2019-11-06 17:00:00	7.6	6.3	5	3.7	2.9	2.3	2	1.8	1.9	2.1	2.1	2.3	2.5	3	3.2	3.4	3.5	3.8	4	4.3	4.3	4.3	4.3	4.4	4.9	4.8	4.8	5	5	5	5.1	5.3
XZ009	申扎县	2019-11-06 18:00:00	7.3	6.5	5.6	4.6	3.8	3.2	2.7	2.3	2.3	2.3	2.3	2.5	2.6	3	3.1	3.4	3.4	3.8	4	4.3	4.2	4.3	4.3	4.4	4.9	4.8	4.8	5	5	5	5.1	5.3
XZ009	申扎县	2019-11-06 19:00:00	5.9	5.8	5.4	4.8	4.3	3.7	3.3	2.8	2.7	2.7	2.7	2.7	2.8	3.1	3.1	3.3	3.4	3.7	4	4.2	4.2	4.2	4.3	4.3	4.9	4.7	4.8	4.9	5	5	5.1	5.3
XZ009	申扎县	2019-11-06 20:00:00	3.1	4	4.3	4.3	4.3	4	3.6	3.2	3	3	3	3	3	3.2	3.2	3.4	3.4	3.7	3.9	4.2	4.1	4.2	4.2	4.3	4.8	4.7	4.8	4.9	5	5	5.1	5.3
XZ009	申扎县	2019-11-06 21:00:00	1.3	2.3	3	3.4	3.8	3.7	3.6	3.3	3.3	3.2	3.2	3.2	3.2	3.3	3.3	3.5	3.5	3.7	3.9	4.2	4.1	4.1	4.2	4.3	4.8	4.7	4.7	4.8	5	5	5.1	5.3
XZ009	申扎县	2019-11-06 22:00:00	0.5	1.4	2.1	2.6	3.1	3.4	3.4	3.3	3.3	3.3	3.3	3.3	3.3	3.5	3.4	3.5	3.5	3.8	4	4.2	4.1	4.1	4.2	4.3	4.8	4.6	4.7	4.8	5	4.9	5.1	5.3
XZ009	申扎县	2019-11-06 23:00:00	0	0.9	1.5	2.1	2.7	3	3.2	3.1	3.2	3.3	3.3	3.4	3.4	3.5	3.5	3.6	3.6	3.8	4	4.2	4.1	4.2	4.2	4.3	4.8	4.6	4.7	4.8	5	4.9	5.1	5.3
XZ009	申扎县	2019-11-07 00:00:00	-0.2	0.5	1.1	1.7	2.3	2.8	3	3	3.1	3.3	3.3	3.4	3.5	3.6	3.6	3.6	3.6	3.9	4	4.3	4.2	4.2	4.2	4.3	4.8	4.6	4.7	4.8	4.9	4.9	5.1	5.3
XZ009	申扎县	2019-11-07 01:00:00	-0.5	0.3	0.8	1.4	2.1	2.5	2.8	2.8	3	3.2	3.2	3.3	3.5	3.6	3.6	3.7	3.6	3.9	4.1	4.3	4.2	4.2	4.2	4.3	4.8	4.6	4.6	4.8	4.9	4.9	5	5.3
XZ009	申扎县	2019-11-07 02:00:00	-1.1	0	0.6	1.2	1.9	2.3	2.6	2.7	2.9	3.1	3.1	3.3	3.5	3.6	3.6	3.8	3.7	4	4.1	4.3	4.3	4.2	4.3	4.3	4.8	4.6	4.7	4.8	4.9	4.9	5	5.2
XZ009	申扎县	2019-11-07 03:00:00	-1.5	-0.1	0.4	1	1.6	2.1	2.4	2.5	2.8	3	3	3.2	3.3	3.6	3.6	3.8	3.7	4	4.1	4.3	4.3	4.3	4.3	4.3	4.8	4.6	4.6	4.8	4.9	4.9	5	5.2
XZ009	申扎县	2019-11-07 04:00:00	-1.9	-0.4	0.2	0.8	1.5	2	2.3	2.4	2.6	3	3	3.1	3.3	3.6	3.6	3.8	3.8	4	4.1	4.4	4.3	4.3	4.3	4.3	4.8	4.6	4.6	4.8	4.9	4.9	5	5.2
XZ009	申扎县	2019-11-07 05:00:00	-2.2	-0.7	0	0.6	1.3	1.8	2.1	2.3	2.5	2.8	2.8	3	3.2	3.6	3.6	3.8	3.7	4	4.1	4.3	4.3	4.3	4.3	4.3	4.8	4.7	4.6	4.8	4.9	4.8	5	5.3
XZ009	申扎县	2019-11-07 06:00:00	-2.4	-1	0	0.5	1.2	1.6	2	2.1	2.5	2.8	2.8	3	3.2	3.5	3.6	3.8	3.7	4	4.1	4.4	4.3	4.3	4.3	4.3	4.8	4.7	4.6	4.8	4.9	4.9	5	5.2
XZ009	申扎县	2019-11-07 07:00:00	-2.6	-1.2	-0.2	0.4	1.1	1.6	1.9	2	2.3	2.6	2.6	2.9	3.1	3.5	3.5	3.7	3.7	4	4.1	4.4	4.3	4.3	4.3	4.3	4.8	4.7	4.6	4.8	4.9	4.9	5	5.2
XZ009	申扎县	2019-11-07 08:00:00	-2.7	-1.4	-0.4	0.3	1	1.5	1.8	2	2.2	2.5	2.5	2.8	3	3.5	3.5	3.6	3.6	4	4.1	4.4	4.3	4.3	4.3	4.3	4.8	4.7	4.7	4.8	4.9	4.8	5	5.2
XZ009	申扎县	2019-11-07 09:00:00	-2.8	-1.6	-0.5	0.1	0.8	1.3	1.6	1.8	2.1	2.5	2.5	2.7	3	3.4	3.5	3.6	3.6	4	4.1	4.3	4.3	4.3	4.3	4.3	4.8	4.6	4.6	4.8	4.9	4.9	5	5.2
XZ009	申扎县	2019-11-07 10:00:00	-1.2	-1.1	-0.5	0	0.7	1.2	1.5	1.7	2	2.3	2.3	2.6	2.9	3.3	3.4	3.6	3.6	3.9	4.1	4.3	4.3	4.3	4.3	4.3	4.8	4.6	4.6	4.8	4.9	4.8	5	5.2
XZ009	申扎县	2019-11-07 11:00:00	0	-0.3	-0.2	0.1	0.7	1.1	1.5	1.6	1.9	2.3	2.3	2.5	2.8	3.2	3.3	3.5	3.5	3.8	4	4.3	4.3	4.3	4.3	4.3	4.8	4.6	4.6	4.8	4.9	4.8	5	5.2
XZ009	申扎县	2019-11-07 12:00:00	1.1	0	0	0.1	0.7	1.1	1.4	1.6	1.8	2.2	2.2	2.5	2.7	3.2	3.3	3.5	3.5	3.8	4	4.3	4.2	4.2	4.3	4.3	4.8	4.6	4.6	4.8	4.9	4.9	5	5.2
XZ009	申扎县	2019-11-07 13:00:00	3.4	0.8	0.1	0.2	0.7	1.1	1.3	1.5	1.8	2.1	2.1	2.4	2.6	3.1	3.2	3.5	3.5	3.8	4	4.3	4.2	4.2	4.2	4.3	4.8	4.6	4.6	4.8	4.9	4.8	5	5.2
XZ009	申扎县	2019-11-07 14:00:00	4.6	2.3	0.6	0.3	0.7	1.1	1.3	1.5	1.7	2.1	2.1	2.3	2.6	3.1	3.2	3.4	3.5	3.8	4	4.2	4.1	4.2	4.2	4.3	4.8	4.6	4.6	4.8	4.9	4.8	5	5.2
XZ009	申扎县	2019-11-07 15:00:00	4.5	3	1.8	1	1	1.1	1.3	1.4	1.7	2	2	2.3	2.5	3	3.1	3.3	3.4	3.7	3.9	4.1	4.1	4.1	4.2	4.3	4.8	4.6	4.6	4.8	4.9	4.8	5	5.2
XZ009	申扎县	2019-11-07 16:00:00	5.4	4.3	3.3	2.5	2	1.8	1.6	1.6	1.8	2	2	2.3	2.5	3	3.1	3.3	3.3	3.6	3.8	4.1	4.1	4.1	4.1	4.3	4.7	4.6	4.6	4.8	4.8	4.8	5	5.1
XZ009	申扎县	2019-11-07 17:00:00	6	4.9	4.1	3.3	2.9	2.5	2.1	2	2	2.1	2.1	2.3	2.5	3	3.1	3.3	3.3	3.6	3.8	4.1	4.1	4.1	4.1	4.2	4.7	4.6	4.6	4.7	4.8	4.8	5	5.1
XZ009	申扎县	2019-11-07 18:00:00	5.8	5.3	4.7	4	3.5	3	2.6	2.4	2.3	2.4	2.4	2.5	2.6	3	3.1	3.3	3.3	3.6	3.8	4.1	4	4	4.1	4.2	4.7	4.6	4.6	4.7	4.8	4.8	5	5.1
XZ009	申扎县	2019-11-07 19:00:00	4.8	4.8	4.6	4.1	3.8	3.5	3.1	2.8	2.6	2.6	2.6	2.7	2.8	3	3.1	3.3	3.3	3.6	3.8	4.1	4	4	4.1	4.2	4.6	4.5	4.6	4.7	4.8	4.8	5	5.1
XZ009	申扎县	2019-11-07 20:00:00	3.8	4	4	3.9	3.8	3.6	3.3	3	2.9	2.9	2.9	2.9	3	3.1	3.1	3.3	3.3	3.6	3.8	4	4	4	4.1	4.1	4.6	4.5	4.5	4.7	4.8	4.8	5	5.1
XZ009	申扎县	2019-11-07 23:00:00	1	1.7	2.3	2.6	3.1	3.3	3.3	3.1	3.2	3.3	3.3	3.3	3.3	3.4	3.4	3.5	3.5	3.7	3.8	4.1	4	4	4.1	4.1	4.6	4.5	4.5	4.6	4.8	4.7	4.9	5.1
XZ009	申扎县	2019-11-08 00:00:00	0.5	1.1	1.7	2.2	2.7	3	3.1	3.1	3.1	3.3	3.3	3.3	3.4	3.5	3.5	3.6	3.5	3.8	3.9	4.1	4.1	4	4.1	4.1	4.6	4.5	4.5	4.6	4.8	4.7	4.9	5.1
XZ009	申扎县	2019-11-08 01:00:00	0.3	0.8	1.3	1.8	2.4	2.7	2.9	3	3.1	3.2	3.2	3.3	3.4	3.5	3.5	3.6	3.6	3.8	3.9	4.1	4.1	4.1	4.1	4.1	4.6	4.5	4.5	4.6	4.8	4.7	4.9	5.1
XZ009	申扎县	2019-11-08 02:00:00	0.1	0.6	1.1	1.6	2.1	2.5	2.8	2.8	3	3.1	3.1	3.3	3.4	3.5	3.5	3.6	3.6	3.8	4	4.1	4.1	4.1	4.1	4.1	4.6	4.5	4.5	4.6	4.8	4.7	4.8	5.1
XZ009	申扎县	2019-11-08 03:00:00	0	0.5	1	1.4	2	2.4	2.6	2.7	2.9	3.1	3.1	3.2	3.4	3.6	3.5	3.7	3.6	3.9	4	4.2	4.1	4.1	4.1	4.1	4.6	4.5	4.5	4.6	4.8	4.7	4.9	5.1
XZ009	申扎县	2019-11-08 04:00:00	0	0.4	0.8	1.3	1.9	2.3	2.5	2.6	2.8	3	3	3.2	3.3	3.5	3.6	3.6	3.6	3.9	4	4.2	4.1	4.1	4.1	4.2	4.6	4.5	4.5	4.6	4.8	4.7	4.8	5.1
XZ009	申扎县	2019-11-08 05:00:00	-0.4	0.2	0.6	1.1	1.7	2.1	2.3	2.5	2.7	3	3	3.1	3.3	3.5	3.6	3.7	3.6	3.9	4	4.3	4.1	4.1	4.1	4.2	4.6	4.5	4.5	4.6	4.7	4.7	4.9	5.1
XZ009	申扎县	2019-11-08 06:00:00	-0.7	0.1	0.5	1	1.6	2	2.3	2.4	2.6	2.8	2.8	3	3.2	3.5	3.5	3.6	3.6	3.9	4	4.3	4.1	4.1	4.1	4.2	4.7	4.5	4.5	4.6	4.8	4.7	4.8	5.1
XZ009	申扎县	2019-11-08 07:00:00	-1	0	0.4	0.9	1.5	1.9	2.1	2.3	2.5	2.8	2.8	3	3.1	3.5	3.5	3.6	3.6	3.9	4	4.3	4.1	4.1	4.1	4.2	4.7	4.5	4.5	4.6	4.7	4.7	4.8	5.1
XZ009	申扎县	2019-11-08 08:00:00	-1.4	-0.2	0.3	0.8	1.3	1.8	2	2.1	2.4	2.7	2.7	2.9	3.1	3.5	3.5	3.6	3.6	3.9	4	4.3	4.2	4.1	4.1	4.2	4.7	4.5	4.5	4.6	4.8	4.7	4.9	5.1
XZ009	申扎县	2019-11-08 09:00:00	-1.5	-0.4	0.1	0.6	1.3	1.6	1.9	2.1	2.3	2.6	2.6	2.8	3	3.4	3.5	3.6	3.6	3.9	4	4.3	4.2	4.1	4.1	4.2	4.7	4.5	4.6	4.6	4.8	4.7	4.9	5.1
XZ009	申扎县	2019-11-08 10:00:00	-0.5	-0.2	0.1	0.6	1.1	1.6	1.8	2	2.2	2.5	2.5	2.8	3	3.4	3.4	3.6	3.6	3.8	4	4.3	4.2	4.1	4.1	4.2	4.6	4.5	4.5	4.6	4.8	4.7	4.9	5.1
XZ009	申扎县	2019-11-08 11:00:00	0.1	0	0.1	0.5	1.1	1.5	1.8	1.9	2.1	2.5	2.5	2.7	2.9	3.3	3.3	3.5	3.5	3.8	4	4.2	4.1	4.1	4.1	4.2	4.6	4.5	4.5	4.6	4.8	4.7	4.8	5
XZ009	申扎县	2019-11-08 12:00:00	1.1	0.2	0.3	0.5	1.1	1.5	1.7	1.8	2.1	2.4	2.4	2.6	2.8	3.3	3.3	3.5	3.5	3.8	4	4.2	4.1	4.1	4.1	4.2	4.6	4.5	4.5	4.6	4.8	4.7	4.9	5
XZ009	申扎县	2019-11-08 13:00:00	3.1	1	0.3	0.6	1.1	1.4	1.6	1.8	2	2.3	2.3	2.6	2.8	3.2	3.3	3.5	3.5	3.8	4	4.2	4.1	4.1	4.1	4.2	4.6	4.5	4.5	4.6	4.7	4.7	4.9	5
XZ009	申扎县	2019-11-08 14:00:00	6.1	4	2.6	1.7	1.6	1.6	1.6	1.7	2	2.3	2.3	2.5	2.8	3.1	3.3	3.5	3.5	3.8	3.9	4.1	4.1	4.1	4.1	4.2	4.7	4.5	4.5	4.6	4.8	4.7	4.8	5
XZ009	申扎县	2019-11-08 15:00:00	8.6	6.6	5	3.6	2.9	2.5	2.1	2	2.1	2.3	2.3	2.5	2.7	3.1	3.2	3.4	3.4	3.7	3.9	4.1	4.1	4.1	4.1	4.2	4.6	4.5	4.5	4.6	4.8	4.7	4.8	5
XZ009	申扎县	2019-11-08 16:00:00	9.3	7.8	6.4	5.1	4.2	3.5	2.9	2.5	2.5	2.5	2.5	2.6	2.8	3.1	3.2	3.3	3.4	3.7	3.9	4.1	4.1	4.1	4.1	4.1	4.6	4.5	4.5	4.6	4.7	4.7	4.8	5
XZ009	申扎县	2019-11-08 17:00:00	9	8.1	7.1	6	5.1	4.3	3.6	3.1	2.9	2.8	2.8	2.8	2.9	3.1	3.2	3.4	3.4	3.6	3.8	4.1	4.1	4.1	4.1	4.1	4.6	4.5	4.5	4.6	4.7	4.7	4.8	5
XZ009	申扎县	2019-11-08 18:00:00	8.5	8	7.2	6.3	5.6	4.8	4.1	3.6	3.3	3.2	3.2	3.1	3.1	3.3	3.3	3.4	3.4	3.6	3.8	4.1	4	4	4.1	4.1	4.6	4.5	4.5	4.6	4.7	4.7	4.8	5
XZ009	申扎县	2019-11-08 19:00:00	6.7	6.8	6.6	6.2	5.8	5.1	4.6	4	3.8	3.6	3.6	3.4	3.3	3.4	3.3	3.5	3.5	3.7	3.8	4.1	4	4	4	4.1	4.6	4.5	4.5	4.6	4.7	4.6	4.8	5
XZ009	申扎县	2019-11-08 20:00:00	5.2	5.6	5.8	5.6	5.5	5.1	4.7	4.3	4	3.8	3.8	3.7	3.6	3.5	3.5	3.5	3.5	3.7	3.9	4.1	4	4	4	4.1	4.6	4.5	4.5	4.6	4.7	4.6	4.8	5
XZ009	申扎县	2019-11-08 21:00:00	4.2	4.7	5	5.1	5.1	5	4.7	4.4	4.1	4	4	3.9	3.8	3.7	3.6	3.6	3.6	3.8	4	4.1	4.1	4	4.1	4.1	4.6	4.5	4.5	4.6	4.7	4.6	4.8	5
XZ009	申扎县	2019-11-08 23:00:00	2.3	3	3.5	3.9	4.3	4.5	4.4	4.3	4.2	4.1	4.1	4.1	4	4	3.8	3.8	3.7	4	4	4.2	4.1	4.1	4.1	4.1	4.6	4.5	4.5	4.6	4.7	4.6	4.8	5
XZ009	申扎县	2019-11-09 00:00:00	1.7	2.4	3	3.4	3.9	4.1	4.2	4.1	4.1	4.1	4.1	4.1	4.1	4	3.9	4	3.8	4	4.1	4.3	4.2	4.1	4.1	4.1	4.6	4.5	4.5	4.6	4.6	4.6	4.8	5
XZ009	申扎县	2019-11-09 01:00:00	1	1.8	2.5	3	3.5	3.8	4	4	4	4.1	4.1	4.1	4.1	4.1	4	4	3.9	4.1	4.1	4.3	4.2	4.2	4.1	4.2	4.6	4.5	4.5	4.6	4.7	4.6	4.8	5
XZ009	申扎县	2019-11-09 02:00:00	0.6	1.3	2	2.5	3.1	3.5	3.7	3.8	3.9	4	4	4	4.1	4.1	4	4.1	3.9	4.1	4.2	4.4	4.3	4.2	4.2	4.2	4.7	4.5	4.5	4.6	4.7	4.6	4.8	5
XZ009	申扎县	2019-11-09 03:00:00	0.5	1.1	1.6	2.2	2.8	3.3	3.5	3.6	3.7	3.9	3.9	4	4	4.1	4	4.1	4	4.2	4.3	4.4	4.3	4.3	4.2	4.3	4.7	4.5	4.5	4.6	4.7	4.6	4.8	5
XZ009	申扎县	2019-11-09 04:00:00	0.1	0.8	1.4	1.9	2.6	3	3.3	3.4	3.6	3.8	3.8	3.9	4	4.1	4	4.1	4	4.2	4.3	4.5	4.3	4.3	4.3	4.3	4.7	4.5	4.5	4.6	4.7	4.6	4.8	5
XZ009	申扎县	2019-11-09 05:00:00	0	0.6	1.1	1.7	2.4	2.8	3.1	3.2	3.4	3.6	3.6	3.8	3.9	4.1	4	4.1	4	4.2	4.3	4.5	4.4	4.3	4.3	4.3	4.7	4.6	4.5	4.6	4.7	4.6	4.8	5
XZ009	申扎县	2019-11-09 06:00:00	-0.2	0.4	1	1.5	2.1	2.6	2.9	3.1	3.3	3.5	3.5	3.7	3.8	4	4	4.1	4	4.2	4.3	4.5	4.4	4.3	4.3	4.3	4.8	4.6	4.6	4.6	4.8	4.7	4.8	5
XZ009	申扎县	2019-11-09 07:00:00	-0.4	0.3	0.8	1.3	2	2.5	2.8	2.9	3.1	3.4	3.4	3.6	3.7	4	4	4.1	4	4.2	4.3	4.5	4.4	4.3	4.3	4.3	4.8	4.6	4.6	4.6	4.8	4.7	4.8	5
XZ009	申扎县	2019-11-09 08:00:00	-0.8	0.1	0.6	1.2	1.8	2.3	2.6	2.8	3	3.3	3.3	3.5	3.6	3.9	4	4.1	4	4.2	4.3	4.5	4.4	4.4	4.3	4.4	4.8	4.6	4.6	4.7	4.8	4.7	4.8	5
XZ009	申扎县	2019-11-09 09:00:00	-1	0	0.5	1	1.7	2.1	2.5	2.6	2.9	3.1	3.1	3.4	3.6	3.9	3.9	4	4	4.2	4.3	4.5	4.4	4.4	4.3	4.4	4.8	4.6	4.6	4.7	4.8	4.7	4.8	5
XZ009	申扎县	2019-11-09 10:00:00	0	0	0.4	0.9	1.5	2	2.3	2.5	2.8	3.1	3.1	3.3	3.5	3.8	3.8	4	4	4.2	4.3	4.5	4.5	4.3	4.3	4.4	4.8	4.6	4.6	4.7	4.8	4.7	4.8	5
XZ009	申扎县	2019-11-09 11:00:00	0.3	0.2	0.5	0.9	1.5	1.9	2.2	2.4	2.6	3	3	3.2	3.4	3.7	3.8	4	3.9	4.1	4.3	4.5	4.4	4.4	4.3	4.4	4.8	4.6	4.6	4.7	4.8	4.7	4.9	5
XZ009	申扎县	2019-11-09 12:00:00	1.6	0.4	0.5	0.9	1.5	1.9	2.1	2.3	2.6	2.8	2.8	3.1	3.3	3.7	3.8	3.9	3.9	4.1	4.3	4.5	4.4	4.3	4.3	4.4	4.8	4.6	4.6	4.7	4.8	4.8	4.9	5.1
XZ009	申扎县	2019-11-09 13:00:00	4.8	3.1	2.1	1.6	1.8	2	2.1	2.3	2.5	2.8	2.8	3	3.2	3.6	3.7	3.8	3.8	4.1	4.3	4.5	4.4	4.3	4.3	4.4	4.8	4.6	4.6	4.7	4.8	4.8	4.9	5.1
XZ009	申扎县	2019-11-09 14:00:00	7.8	5.8	4.4	3.4	2.9	2.6	2.5	2.4	2.6	2.8	2.8	3	3.1	3.6	3.6	3.8	3.8	4.1	4.2	4.5	4.3	4.3	4.3	4.4	4.8	4.6	4.6	4.7	4.8	4.8	4.9	5
XZ009	申扎县	2019-11-09 15:00:00	9.6	7.8	6.3	5	4.1	3.5	3.1	2.8	2.8	2.9	2.9	3	3.2	3.5	3.6	3.8	3.8	4	4.1	4.5	4.3	4.3	4.3	4.3	4.8	4.6	4.6	4.7	4.8	4.8	4.9	5.1
XZ009	申扎县	2019-11-09 16:00:00	10.5	9.1	7.6	6.3	5.3	4.5	3.8	3.3	3.2	3.1	3.1	3.2	3.3	3.5	3.6	3.7	3.8	4	4.1	4.4	4.3	4.3	4.3	4.3	4.8	4.6	4.6	4.7	4.8	4.8	4.9	5.1
XZ009	申扎县	2019-11-09 17:00:00	10.8	9.6	8.5	7.2	6.1	5.2	4.5	4	3.6	3.5	3.5	3.5	3.5	3.6	3.6	3.8	3.7	4	4.1	4.4	4.3	4.3	4.3	4.3	4.8	4.6	4.6	4.7	4.8	4.8	4.9	5.1
XZ009	申扎县	2019-11-09 18:00:00	9.7	9.3	8.6	7.6	6.8	5.9	5.1	4.5	4.1	3.9	3.9	3.8	3.7	3.7	3.6	3.8	3.8	4	4.1	4.4	4.3	4.3	4.3	4.3	4.8	4.6	4.6	4.7	4.8	4.8	4.9	5.1
XZ009	申扎县	2019-11-09 19:00:00	7.6	7.9	7.8	7.3	6.8	6.2	5.5	5	4.5	4.3	4.3	4.1	4	3.9	3.8	3.9	3.8	4	4.1	4.4	4.3	4.3	4.3	4.3	4.8	4.6	4.6	4.7	4.8	4.8	4.9	5.1
XZ009	申扎县	2019-11-09 20:00:00	4.9	6	6.5	6.5	6.5	6.1	5.6	5.1	4.8	4.6	4.6	4.3	4.2	4	4	4	3.8	4.1	4.2	4.4	4.3	4.3	4.3	4.3	4.8	4.6	4.6	4.7	4.8	4.8	4.9	5.1
XZ009	申扎县	2019-11-09 21:00:00	2.9	4.1	5	5.4	5.7	5.7	5.5	5.1	4.9	4.8	4.8	4.5	4.4	4.2	4.1	4.1	4	4.1	4.2	4.5	4.3	4.3	4.3	4.3	4.8	4.6	4.6	4.7	4.8	4.8	4.9	5
XZ009	申扎县	2019-11-09 22:00:00	1.5	2.8	3.7	4.4	5	5.1	5.1	5	4.9	4.8	4.8	4.6	4.5	4.3	4.2	4.2	4.1	4.3	4.3	4.5	4.4	4.3	4.3	4.3	4.8	4.6	4.6	4.7	4.8	4.7	4.8	5.1
XZ009	申扎县	2019-11-09 23:00:00	0.7	1.8	2.8	3.5	4.3	4.6	4.8	4.7	4.8	4.7	4.7	4.6	4.6	4.5	4.3	4.3	4.1	4.3	4.4	4.6	4.5	4.3	4.3	4.4	4.8	4.6	4.6	4.7	4.8	4.7	4.9	5
XZ009	申扎县	2019-11-10 00:00:00	0.2	1.3	2.1	2.9	3.7	4.1	4.4	4.5	4.5	4.6	4.6	4.6	4.6	4.5	4.4	4.4	4.2	4.4	4.5	4.6	4.5	4.4	4.3	4.4	4.8	4.6	4.6	4.7	4.8	4.8	4.9	5
XZ009	申扎县	2019-11-10 01:00:00	0	0.8	1.6	2.5	3.2	3.8	4	4.1	4.3	4.5	4.5	4.5	4.5	4.5	4.4	4.5	4.3	4.5	4.5	4.6	4.5	4.5	4.4	4.4	4.8	4.7	4.6	4.7	4.8	4.8	4.9	5.1
XZ009	申扎县	2019-11-10 02:00:00	-0.5	0.5	1.3	2	2.8	3.4	3.7	3.9	4.1	4.3	4.3	4.4	4.5	4.5	4.4	4.5	4.3	4.5	4.6	4.7	4.6	4.5	4.5	4.5	4.9	4.7	4.6	4.7	4.8	4.8	4.9	5.1
XZ009	申扎县	2019-11-10 03:00:00	-0.9	0.2	1	1.7	2.5	3.1	3.5	3.6	3.9	4.1	4.1	4.2	4.3	4.5	4.4	4.5	4.3	4.5	4.6	4.8	4.6	4.5	4.5	4.5	4.9	4.7	4.6	4.8	4.8	4.8	4.9	5.1
XZ009	申扎县	2019-11-10 04:00:00	-1.4	0	0.7	1.5	2.2	2.8	3.1	3.4	3.6	3.9	3.9	4.1	4.2	4.4	4.4	4.5	4.3	4.5	4.6	4.8	4.6	4.5	4.5	4.5	4.9	4.7	4.7	4.8	4.8	4.8	4.9	5.1
XZ009	申扎县	2019-11-10 05:00:00	-1.8	-0.3	0.5	1.1	2	2.6	3	3.1	3.5	3.8	3.8	4	4.1	4.3	4.3	4.5	4.3	4.5	4.6	4.8	4.6	4.6	4.5	4.5	5	4.7	4.7	4.8	4.8	4.8	4.9	5.1
XZ009	申扎县	2019-11-10 06:00:00	-2.2	-0.6	0.3	1	1.8	2.4	2.8	3	3.3	3.6	3.6	3.8	4	4.3	4.3	4.4	4.3	4.5	4.6	4.8	4.6	4.6	4.5	4.6	5	4.8	4.8	4.8	4.9	4.8	5	5.1
XZ009	申扎县	2019-11-10 07:00:00	-2.5	-0.9	0	0.8	1.6	2.1	2.6	2.8	3.1	3.5	3.5	3.6	3.9	4.2	4.2	4.3	4.3	4.5	4.6	4.8	4.6	4.6	4.5	4.6	5	4.8	4.8	4.8	4.9	4.8	5	5.1
XZ009	申扎县	2019-11-10 08:00:00	-3	-1.3	0	0.6	1.4	2	2.4	2.6	3	3.3	3.3	3.5	3.8	4.1	4.1	4.3	4.2	4.5	4.6	4.8	4.6	4.6	4.6	4.6	5	4.8	4.8	4.8	4.9	4.8	5	5.1
XZ009	申扎县	2019-11-10 09:00:00	-3.3	-1.6	-0.3	0.4	1.2	1.8	2.2	2.5	2.8	3.1	3.1	3.4	3.6	4	4.1	4.2	4.2	4.4	4.5	4.7	4.6	4.6	4.5	4.6	5	4.8	4.8	4.9	4.9	4.8	5	5.1
XZ009	申扎县	2019-11-10 10:00:00	-1.6	-1.2	-0.4	0.3	1.1	1.6	2	2.3	2.6	3	3	3.3	3.5	3.9	4	4.1	4.1	4.4	4.5	4.7	4.6	4.6	4.5	4.6	5	4.8	4.8	4.8	4.9	4.8	5	5.1
XZ009	申扎县	2019-11-10 11:00:00	0	-0.4	0	0.3	1	1.5	1.9	2.1	2.5	2.8	2.8	3.1	3.4	3.8	3.9	4	4.1	4.3	4.5	4.7	4.6	4.6	4.5	4.6	5	4.8	4.8	4.9	4.9	4.9	5	5.1
XZ009	申扎县	2019-11-10 12:00:00	1.3	0	0	0.3	1	1.5	1.8	2	2.3	2.7	2.7	3	3.3	3.7	3.8	4	4	4.3	4.5	4.6	4.5	4.5	4.5	4.5	5	4.8	4.8	4.9	4.9	4.9	5	5.1
XZ009	申扎县	2019-11-10 13:00:00	3.3	0.9	0.2	0.4	1	1.4	1.7	2	2.3	2.6	2.6	2.9	3.2	3.6	3.8	3.9	3.9	4.2	4.4	4.6	4.5	4.5	4.5	4.5	5	4.8	4.8	4.9	5	4.8	5	5.1
XZ009	申扎县	2019-11-10 14:00:00	4.9	2.5	0.8	0.5	1	1.4	1.7	1.9	2.2	2.5	2.5	2.8	3.1	3.6	3.6	3.8	3.9	4.1	4.3	4.6	4.5	4.5	4.5	4.5	5	4.8	4.8	4.8	5	4.8	5	5.1
XZ009	申扎县	2019-11-10 15:00:00	6.6	4.8	3.3	2.3	2	1.8	1.8	1.9	2.1	2.5	2.5	2.7	3	3.5	3.6	3.8	3.8	4.1	4.3	4.5	4.5	4.5	4.5	4.5	5	4.8	4.7	4.8	4.9	4.9	5	5.1
XZ009	申扎县	2019-11-10 16:00:00	8.2	6.6	5.1	4	3.3	2.8	2.5	2.3	2.3	2.6	2.6	2.7	3	3.4	3.5	3.8	3.7	4.1	4.2	4.5	4.4	4.4	4.4	4.5	4.9	4.8	4.7	4.8	4.9	4.8	5	5.1
XZ009	申扎县	2019-11-10 17:00:00	8.8	7.6	6.3	5.2	4.4	3.6	3.1	2.8	2.7	2.8	2.8	2.9	3	3.4	3.5	3.6	3.7	4	4.1	4.5	4.3	4.4	4.4	4.5	4.9	4.7	4.7	4.8	4.9	4.8	5	5.1
XZ009	申扎县	2019-11-10 18:00:00	8.5	7.7	6.8	5.9	5.1	4.4	3.8	3.3	3.1	3.1	3.1	3.1	3.2	3.5	3.5	3.6	3.7	4	4.1	4.4	4.3	4.3	4.3	4.4	4.9	4.7	4.7	4.8	4.9	4.8	5	5.1
XZ009	申扎县	2019-11-10 19:00:00	6.8	6.8	6.5	6	5.5	4.8	4.3	3.8	3.6	3.5	3.5	3.4	3.4	3.5	3.5	3.7	3.6	4	4.1	4.4	4.3	4.3	4.3	4.4	4.8	4.7	4.7	4.8	4.9	4.8	5	5.1
XZ009	申扎县	2019-11-10 20:00:00	4.2	5.1	5.4	5.4	5.3	4.9	4.5	4.1	3.9	3.8	3.8	3.6	3.6	3.6	3.6	3.7	3.7	4	4.1	4.4	4.3	4.3	4.3	4.3	4.8	4.6	4.6	4.8	4.9	4.8	5	5.1
XZ009	申扎县	2019-11-10 21:00:00	2.3	3.3	4	4.5	4.7	4.6	4.5	4.2	4	4	4	3.8	3.8	3.8	3.8	3.8	3.8	4	4.1	4.4	4.3	4.3	4.3	4.3	4.8	4.6	4.7	4.8	4.8	4.8	5	5.1
XZ009	申扎县	2019-11-10 22:00:00	1.1	2.2	3	3.6	4.1	4.3	4.3	4.1	4	4	4	4	4	3.9	3.8	3.9	3.8	4.1	4.1	4.4	4.3	4.3	4.3	4.3	4.8	4.6	4.6	4.8	4.9	4.8	5	5.1
XZ009	申扎县	2019-11-10 23:00:00	0.3	1.3	2.1	2.8	3.5	3.8	4	3.9	4	4	4	4	4	4	4	4	3.9	4.1	4.2	4.4	4.3	4.3	4.3	4.3	4.8	4.6	4.6	4.8	4.8	4.8	4.9	5.1
XZ009	申扎县	2019-11-11 00:00:00	0	0.8	1.6	2.3	3	3.5	3.6	3.7	3.8	4	4	4	4	4.1	4	4.1	4	4.1	4.3	4.5	4.3	4.3	4.3	4.3	4.8	4.6	4.6	4.8	4.8	4.8	5	5.1
XZ009	申扎县	2019-11-11 01:00:00	-0.4	0.5	1.2	1.9	2.6	3.1	3.4	3.5	3.6	3.8	3.8	3.9	4	4.1	4	4.1	4	4.2	4.3	4.5	4.4	4.3	4.3	4.3	4.8	4.6	4.6	4.8	4.8	4.8	4.9	5.1
XZ009	申扎县	2019-11-11 02:00:00	-0.9	0.1	0.9	1.6	2.3	2.8	3.1	3.3	3.5	3.7	3.7	3.8	4	4.1	4	4.1	4	4.2	4.3	4.5	4.5	4.4	4.3	4.4	4.8	4.6	4.6	4.8	4.8	4.8	4.9	5.1
XZ009	申扎县	2019-11-11 03:00:00	-1.4	0	0.6	1.3	2	2.6	2.9	3	3.3	3.6	3.6	3.7	3.8	4.1	4	4.1	4	4.3	4.4	4.5	4.5	4.4	4.4	4.4	4.8	4.6	4.6	4.8	4.8	4.8	4.9	5.1
XZ009	申扎县	2019-11-11 04:00:00	-1.9	-0.3	0.4	1.1	1.8	2.3	2.7	2.9	3.1	3.4	3.4	3.6	3.8	4	4	4.1	4	4.3	4.3	4.6	4.5	4.4	4.4	4.4	4.8	4.6	4.6	4.8	4.8	4.8	4.9	5.1
XZ009	申扎县	2019-11-11 05:00:00	-2	-0.6	0.2	0.8	1.6	2.1	2.5	2.7	3	3.3	3.3	3.5	3.7	4	4	4.1	4	4.3	4.4	4.6	4.5	4.5	4.4	4.4	4.9	4.7	4.6	4.8	4.8	4.8	4.9	5.1
XZ009	申扎县	2019-11-11 06:00:00	-2	-0.7	0	0.7	1.5	2	2.3	2.5	2.8	3.1	3.1	3.4	3.6	3.9	4	4.1	4	4.3	4.3	4.6	4.5	4.4	4.4	4.5	4.8	4.7	4.6	4.8	4.8	4.8	4.9	5.1
XZ009	申扎县	2019-11-11 07:00:00	-2.1	-0.9	0	0.5	1.3	1.8	2.2	2.4	2.7	3	3	3.3	3.5	3.8	3.8	4	4	4.3	4.3	4.6	4.5	4.4	4.4	4.4	4.8	4.7	4.6	4.8	4.8	4.8	4.9	5.1
XZ009	申扎县	2019-11-11 08:00:00	-2.5	-1.2	-0.1	0.4	1.1	1.6	2	2.2	2.5	2.9	2.9	3.1	3.4	3.7	3.8	4	4	4.2	4.3	4.6	4.5	4.5	4.4	4.5	4.9	4.7	4.7	4.8	4.8	4.8	4.9	5.1
XZ009	申扎县	2019-11-11 09:00:00	-2.8	-1.4	-0.4	0.3	1	1.5	1.9	2.1	2.4	2.8	2.8	3	3.3	3.7	3.8	3.9	3.9	4.1	4.3	4.5	4.5	4.4	4.4	4.5	4.9	4.7	4.7	4.8	4.8	4.8	4.9	5.1
XZ009	申扎县	2019-11-11 10:00:00	-1.4	-1.1	-0.4	0.1	0.9	1.4	1.8	2	2.3	2.6	2.6	3	3.2	3.6	3.7	3.8	3.8	4.1	4.3	4.5	4.4	4.4	4.4	4.4	4.8	4.7	4.7	4.8	4.8	4.8	5	5.1
XZ009	申扎县	2019-11-11 11:00:00	0	-0.4	-0.1	0.1	0.8	1.3	1.6	1.8	2.2	2.5	2.5	2.8	3.1	3.5	3.6	3.8	3.8	4.1	4.2	4.5	4.4	4.4	4.4	4.4	4.8	4.7	4.6	4.8	4.8	4.8	5	5.1
XZ009	申扎县	2019-11-11 12:00:00	1.3	0	0	0.3	0.8	1.3	1.6	1.8	2.1	2.5	2.5	2.7	3	3.5	3.5	3.8	3.7	4	4.2	4.5	4.4	4.3	4.3	4.4	4.8	4.6	4.6	4.8	4.8	4.8	4.9	5.1
XZ009	申扎县	2019-11-11 13:00:00	3.1	0.8	0.1	0.3	0.8	1.3	1.5	1.7	2	2.3	2.3	2.6	2.9	3.4	3.5	3.6	3.6	4	4.1	4.4	4.3	4.3	4.3	4.4	4.8	4.7	4.6	4.8	4.8	4.8	4.9	5.1
XZ009	申扎县	2019-11-11 14:00:00	5.1	2.6	0.7	0.4	0.8	1.2	1.5	1.6	2	2.3	2.3	2.6	2.8	3.3	3.4	3.6	3.6	4	4.1	4.4	4.3	4.3	4.3	4.3	4.8	4.6	4.6	4.8	4.8	4.8	4.9	5.1
XZ009	申扎县	2019-11-11 15:00:00	6.8	4.6	3.1	2	1.6	1.5	1.6	1.6	1.9	2.2	2.2	2.5	2.8	3.3	3.3	3.5	3.6	3.9	4.1	4.3	4.3	4.3	4.3	4.3	4.8	4.6	4.6	4.8	4.8	4.8	4.9	5.1
XZ009	申扎县	2019-11-11 16:00:00	8.1	6.4	5	3.8	3	2.5	2.1	2	2.1	2.3	2.3	2.5	2.7	3.1	3.3	3.5	3.5	3.8	4	4.3	4.2	4.2	4.3	4.3	4.8	4.6	4.6	4.8	4.8	4.8	4.9	5.1
XZ009	申扎县	2019-11-11 17:00:00	8.5	7.3	6.1	4.9	4.1	3.4	2.9	2.5	2.5	2.5	2.5	2.6	2.8	3.1	3.3	3.5	3.5	3.8	4	4.3	4.2	4.2	4.2	4.3	4.8	4.6	4.6	4.7	4.8	4.8	4.9	5.1
XZ009	申扎县	2019-11-11 18:00:00	7.7	7.1	6.4	5.5	4.8	4.1	3.5	3.1	2.9	2.8	2.8	2.9	3	3.2	3.3	3.5	3.5	3.8	4	4.2	4.1	4.2	4.2	4.3	4.7	4.6	4.6	4.7	4.8	4.8	4.9	5.1
XZ009	申扎县	2019-11-11 19:00:00	6.3	6.3	6	5.5	5	4.5	4	3.5	3.3	3.2	3.2	3.1	3.1	3.3	3.3	3.5	3.5	3.8	3.9	4.2	4.1	4.1	4.1	4.3	4.7	4.5	4.6	4.7	4.8	4.7	4.8	5
XZ009	申扎县	2019-11-11 20:00:00	4.1	4.8	5.1	5	4.9	4.6	4.1	3.8	3.6	3.5	3.5	3.4	3.3	3.4	3.4	3.5	3.5	3.8	4	4.2	4.1	4.1	4.1	4.2	4.7	4.5	4.6	4.6	4.8	4.7	4.8	5
XZ009	申扎县	2019-11-11 21:00:00	2.2	3.3	3.9	4.2	4.4	4.4	4.2	3.9	3.8	3.6	3.6	3.6	3.5	3.5	3.5	3.6	3.5	3.8	4	4.2	4.1	4.1	4.1	4.2	4.6	4.5	4.5	4.6	4.8	4.7	4.8	5
XZ009	申扎县	2019-11-11 22:00:00	0.6	1.8	2.7	3.3	3.8	4	4	3.8	3.8	3.8	3.8	3.7	3.7	3.6	3.6	3.7	3.6	3.9	4	4.2	4.1	4.1	4.1	4.2	4.6	4.5	4.5	4.6	4.7	4.7	4.8	5
XZ009	申扎县	2019-11-11 23:00:00	0.3	1.1	1.9	2.6	3.2	3.6	3.7	3.6	3.7	3.7	3.7	3.8	3.8	3.8	3.7	3.8	3.6	4	4	4.3	4.1	4.1	4.1	4.2	4.6	4.5	4.5	4.6	4.7	4.6	4.8	5
XZ009	申扎县	2019-11-12 00:00:00	0	0.8	1.5	2.1	2.8	3.2	3.4	3.5	3.5	3.6	3.6	3.7	3.8	3.8	3.8	3.8	3.8	4	4.1	4.3	4.2	4.1	4.1	4.2	4.6	4.5	4.5	4.6	4.7	4.6	4.8	5
XZ009	申扎县	2019-11-12 01:00:00	-0.2	0.5	1.1	1.8	2.5	2.9	3.1	3.2	3.4	3.6	3.6	3.7	3.8	3.8	3.8	3.9	3.8	4	4.1	4.3	4.2	4.2	4.1	4.2	4.6	4.5	4.5	4.6	4.7	4.7	4.8	5
XZ009	申扎县	2019-11-12 02:00:00	-0.4	0.3	0.9	1.5	2.2	2.6	2.9	3	3.3	3.5	3.5	3.6	3.7	3.8	3.8	3.9	3.8	4	4.1	4.3	4.3	4.2	4.2	4.2	4.7	4.5	4.5	4.6	4.7	4.6	4.8	5
XZ009	申扎县	2019-11-12 03:00:00	-0.5	0.1	0.8	1.3	2	2.5	2.7	2.8	3.1	3.3	3.3	3.5	3.6	3.8	3.8	3.9	3.8	4	4.1	4.4	4.3	4.2	4.2	4.3	4.7	4.5	4.5	4.6	4.7	4.6	4.8	5
XZ009	申扎县	2019-11-12 04:00:00	-0.7	0	0.6	1.1	1.8	2.3	2.5	2.7	3	3.2	3.2	3.4	3.5	3.8	3.8	3.9	3.8	4.1	4.1	4.4	4.3	4.3	4.2	4.3	4.7	4.6	4.5	4.6	4.7	4.6	4.8	5
XZ009	申扎县	2019-11-12 05:00:00	-1	0	0.5	1	1.6	2.1	2.4	2.5	2.8	3.1	3.1	3.3	3.5	3.8	3.8	3.9	3.8	4.1	4.2	4.4	4.3	4.3	4.2	4.3	4.7	4.6	4.5	4.6	4.7	4.6	4.8	5
XZ009	申扎县	2019-11-12 06:00:00	-1.2	-0.2	0.3	0.8	1.5	2	2.3	2.5	2.7	3	3	3.2	3.3	3.7	3.7	3.8	3.8	4.1	4.2	4.4	4.3	4.3	4.3	4.3	4.7	4.5	4.5	4.6	4.7	4.6	4.8	5
XZ009	申扎县	2019-11-12 07:00:00	-1.4	-0.4	0.2	0.7	1.3	1.8	2.1	2.3	2.6	2.9	2.9	3.1	3.3	3.6	3.7	3.8	3.8	4.1	4.1	4.4	4.3	4.3	4.2	4.3	4.7	4.6	4.5	4.6	4.7	4.6	4.8	5
XZ009	申扎县	2019-11-12 08:00:00	-1.6	-0.5	0.1	0.6	1.3	1.7	2	2.1	2.5	2.8	2.8	3	3.2	3.6	3.6	3.8	3.8	4	4.1	4.4	4.3	4.3	4.2	4.3	4.7	4.6	4.5	4.6	4.7	4.6	4.8	5
XZ009	申扎县	2019-11-12 09:00:00	-1.8	-0.7	0	0.5	1.1	1.6	1.9	2.1	2.3	2.7	2.7	2.9	3.1	3.5	3.6	3.7	3.7	4	4.1	4.4	4.3	4.3	4.3	4.3	4.7	4.6	4.5	4.6	4.7	4.7	4.8	5
XZ009	申扎县	2019-11-12 10:00:00	-0.7	-0.5	0	0.4	1.1	1.5	1.8	2	2.3	2.6	2.6	2.8	3.1	3.5	3.5	3.7	3.7	4	4.1	4.3	4.3	4.2	4.2	4.3	4.7	4.5	4.5	4.6	4.7	4.6	4.8	5
XZ009	申扎县	2019-11-12 11:00:00	0.1	0	0	0.4	1	1.5	1.7	1.9	2.2	2.5	2.5	2.7	3	3.4	3.5	3.6	3.6	3.9	4.1	4.3	4.3	4.2	4.2	4.3	4.7	4.5	4.5	4.6	4.7	4.6	4.8	5
XZ009	申扎县	2019-11-12 12:00:00	0.9	0.1	0.1	0.5	1	1.4	1.6	1.8	2.1	2.4	2.4	2.6	2.9	3.3	3.4	3.6	3.6	3.9	4	4.3	4.2	4.2	4.2	4.3	4.7	4.6	4.5	4.6	4.7	4.6	4.8	5
XZ009	申扎县	2019-11-12 13:00:00	2.6	0.6	0.3	0.5	1	1.3	1.6	1.8	2	2.3	2.3	2.6	2.8	3.3	3.4	3.6	3.6	3.8	4	4.2	4.2	4.1	4.2	4.3	4.7	4.5	4.5	4.6	4.7	4.6	4.8	5
XZ009	申扎县	2019-11-12 15:00:00	6.1	4.5	3.2	2.3	2	1.8	1.8	1.8	2	2.3	2.3	2.5	2.7	3.1	3.3	3.5	3.5	3.8	4	4.2	4.1	4.1	4.1	4.2	4.6	4.5	4.5	4.6	4.7	4.6	4.8	5
XZ009	申扎县	2019-11-12 16:00:00	7.3	5.9	4.7	3.7	3.1	2.6	2.3	2.1	2.1	2.3	2.3	2.5	2.7	3.1	3.2	3.4	3.4	3.7	3.9	4.1	4.1	4.1	4.1	4.1	4.6	4.5	4.5	4.6	4.7	4.6	4.8	5
XZ009	申扎县	2019-11-12 17:00:00	7.6	6.6	5.6	4.6	4	3.3	2.9	2.6	2.5	2.6	2.6	2.6	2.8	3.1	3.2	3.4	3.4	3.7	3.9	4.1	4.1	4.1	4.1	4.1	4.6	4.5	4.5	4.6	4.7	4.6	4.8	5
XZ009	申扎县	2019-11-12 18:00:00	7.1	6.5	5.9	5.1	4.6	4	3.5	3	2.9	2.9	2.9	2.9	3	3.1	3.2	3.4	3.4	3.7	3.8	4.1	4	4	4.1	4.1	4.6	4.5	4.5	4.6	4.7	4.6	4.8	5
XZ009	申扎县	2019-11-12 19:00:00	5.7	5.8	5.6	5.1	4.8	4.3	3.9	3.5	3.3	3.1	3.1	3.1	3.1	3.3	3.3	3.4	3.4	3.6	3.8	4.1	4	4	4	4.1	4.6	4.4	4.5	4.6	4.6	4.6	4.8	5
XZ009	申扎县	2019-11-12 20:00:00	3.4	4.3	4.6	4.6	4.6	4.3	4	3.7	3.5	3.4	3.4	3.3	3.3	3.4	3.3	3.5	3.5	3.7	3.8	4.1	4	4	4	4.1	4.6	4.5	4.5	4.6	4.6	4.6	4.8	4.9
XZ009	申扎县	2019-11-12 21:00:00	1.5	2.6	3.3	3.8	4.1	4.1	4	3.7	3.6	3.6	3.6	3.5	3.5	3.5	3.5	3.5	3.5	3.8	3.9	4.1	4	4	4	4.1	4.5	4.5	4.4	4.6	4.6	4.6	4.8	4.9
XZ009	申扎县	2019-11-12 22:00:00	0.3	1.4	2.3	2.9	3.5	3.7	3.8	3.6	3.6	3.6	3.6	3.6	3.6	3.6	3.5	3.6	3.5	3.8	3.9	4.1	4.1	4	4	4.1	4.6	4.4	4.4	4.5	4.6	4.6	4.7	4.9
XZ009	申扎县	2019-11-12 23:00:00	0	0.8	1.6	2.3	3	3.3	3.5	3.5	3.5	3.6	3.6	3.6	3.6	3.6	3.6	3.7	3.6	3.8	4	4.1	4.1	4	4	4.1	4.6	4.4	4.4	4.5	4.6	4.6	4.7	4.9
XZ009	申扎县	2019-11-13 00:00:00	-0.4	0.5	1.2	1.8	2.5	3	3.2	3.3	3.4	3.5	3.5	3.6	3.6	3.7	3.7	3.8	3.6	3.9	4	4.2	4.1	4	4	4.1	4.6	4.4	4.4	4.5	4.6	4.5	4.7	4.9
XZ009	申扎县	2019-11-13 01:00:00	-0.8	0.2	0.9	1.5	2.2	2.6	3	3.1	3.2	3.4	3.4	3.5	3.6	3.8	3.7	3.8	3.7	3.9	4	4.2	4.1	4.1	4.1	4.1	4.6	4.4	4.4	4.5	4.6	4.6	4.7	4.9
XZ009	申扎县	2019-11-13 02:00:00	-1.3	0	0.6	1.2	2	2.4	2.7	2.8	3.1	3.3	3.3	3.4	3.6	3.8	3.7	3.8	3.7	4	4	4.3	4.1	4.1	4.1	4.1	4.6	4.4	4.4	4.5	4.6	4.6	4.7	4.9
XZ009	申扎县	2019-11-13 03:00:00	-1.7	-0.3	0.4	1	1.7	2.2	2.5	2.6	2.9	3.1	3.1	3.3	3.5	3.7	3.7	3.8	3.8	4	4.1	4.3	4.1	4.1	4.1	4.1	4.6	4.5	4.4	4.5	4.6	4.5	4.7	4.9
XZ009	申扎县	2019-11-13 04:00:00	-2.3	-0.7	0.1	0.8	1.5	2	2.3	2.5	2.8	3	3	3.2	3.4	3.6	3.7	3.8	3.7	4	4.1	4.3	4.2	4.1	4.1	4.1	4.6	4.5	4.4	4.5	4.6	4.6	4.7	4.9
XZ009	申扎县	2019-11-13 05:00:00	-2.7	-1	0	0.6	1.3	1.8	2.2	2.4	2.6	2.9	2.9	3.1	3.3	3.6	3.6	3.8	3.7	4	4.1	4.3	4.2	4.1	4.1	4.2	4.6	4.5	4.5	4.5	4.6	4.6	4.7	4.9
XZ009	申扎县	2019-11-13 06:00:00	-2.9	-1.3	-0.1	0.5	1.2	1.7	2	2.2	2.5	2.8	2.8	3	3.3	3.6	3.6	3.8	3.7	4	4.1	4.3	4.2	4.1	4.1	4.1	4.6	4.5	4.5	4.5	4.6	4.6	4.7	4.9
XZ009	申扎县	2019-11-13 07:00:00	-3.4	-1.7	-0.4	0.3	1	1.5	1.9	2.1	2.4	2.6	2.6	2.9	3.1	3.5	3.5	3.7	3.6	4	4.1	4.3	4.2	4.1	4.1	4.1	4.6	4.5	4.5	4.6	4.6	4.6	4.7	4.9
XZ009	申扎县	2019-11-13 08:00:00	-3.8	-2	-0.7	0.1	0.9	1.4	1.8	2	2.2	2.6	2.6	2.8	3.1	3.5	3.5	3.6	3.6	3.9	4	4.3	4.2	4.1	4.1	4.1	4.6	4.5	4.5	4.5	4.6	4.6	4.7	4.9
XZ009	申扎县	2019-11-13 09:00:00	-4.2	-2.4	-1	0	0.7	1.2	1.6	1.8	2.1	2.5	2.5	2.7	3	3.4	3.5	3.6	3.6	3.9	4	4.2	4.1	4.1	4.1	4.1	4.6	4.5	4.5	4.5	4.6	4.6	4.7	4.8
XZ009	申扎县	2019-11-13 10:00:00	-2.6	-2.1	-1.2	-0.1	0.6	1.1	1.5	1.7	2	2.3	2.3	2.6	2.8	3.3	3.4	3.5	3.5	3.8	4	4.2	4.1	4.1	4.1	4.1	4.6	4.5	4.5	4.6	4.6	4.6	4.7	4.9
XZ009	申扎县	2019-11-13 11:00:00	-0.4	-0.9	-0.7	-0.1	0.5	1	1.3	1.6	1.9	2.3	2.3	2.5	2.8	3.2	3.3	3.5	3.5	3.8	4	4.2	4.1	4.1	4.1	4.1	4.6	4.5	4.5	4.5	4.6	4.6	4.7	4.9
XZ009	申扎县	2019-11-13 13:00:00	3.5	0.7	0	0	0.5	1	1.2	1.4	1.7	2	2	2.3	2.6	3.1	3.1	3.3	3.4	3.7	3.9	4.1	4.1	4.1	4.1	4.1	4.6	4.4	4.5	4.5	4.6	4.6	4.7	4.9
XZ009	申扎县	2019-11-13 14:00:00	5.3	2.5	0.5	0.2	0.6	0.9	1.2	1.4	1.6	2	2	2.3	2.5	3	3.1	3.3	3.3	3.6	3.8	4.1	4	4	4	4.1	4.6	4.4	4.4	4.5	4.6	4.6	4.7	4.8
XZ009	申扎县	2019-11-13 15:00:00	6.5	4	2	0.6	0.6	1	1.2	1.3	1.6	2	2	2.2	2.5	3	3.1	3.3	3.3	3.6	3.8	4	4	4	4	4.1	4.5	4.4	4.4	4.5	4.6	4.5	4.7	4.9
XZ009	申扎县	2019-11-13 16:00:00	7.8	5.8	4.1	2.8	2.1	1.6	1.5	1.5	1.6	1.9	1.9	2.1	2.4	2.9	3	3.2	3.3	3.6	3.7	4	4	4	4	4.1	4.5	4.4	4.4	4.5	4.6	4.5	4.6	4.9
XZ009	申扎县	2019-11-13 17:00:00	8.2	6.8	5.5	4.3	3.4	2.7	2.3	1.9	1.9	2.1	2.1	2.2	2.4	2.8	3	3.1	3.2	3.5	3.7	4	3.9	3.9	4	4	4.5	4.3	4.4	4.5	4.6	4.5	4.6	4.9
XZ009	申扎县	2019-11-13 18:00:00	7.5	6.7	5.9	5	4.2	3.5	2.9	2.5	2.3	2.3	2.3	2.4	2.5	2.9	3	3.1	3.1	3.5	3.6	4	3.9	3.9	4	4	4.5	4.3	4.3	4.5	4.6	4.5	4.6	4.8
XZ009	申扎县	2019-11-13 19:00:00	6	5.9	5.6	5	4.5	4	3.4	3	2.8	2.7	2.7	2.7	2.7	3	3	3.1	3.1	3.5	3.6	3.9	3.9	3.9	3.9	4	4.5	4.3	4.3	4.5	4.5	4.5	4.6	4.8
XZ009	申扎县	2019-11-13 20:00:00	3.2	4.1	4.5	4.5	4.3	4	3.6	3.3	3.1	3	3	3	3	3	3	3.2	3.1	3.5	3.6	3.9	3.8	3.8	3.8	4	4.4	4.3	4.3	4.5	4.5	4.5	4.6	4.8
XZ009	申扎县	2019-11-13 21:00:00	2	2.7	3.3	3.6	3.9	3.8	3.6	3.4	3.3	3.2	3.2	3.1	3.1	3.2	3.1	3.3	3.2	3.5	3.6	3.9	3.8	3.8	3.8	4	4.5	4.3	4.3	4.4	4.5	4.5	4.6	4.8
XZ009	申扎县	2019-11-13 22:00:00	1	1.8	2.5	2.9	3.3	3.5	3.5	3.3	3.3	3.3	3.3	3.3	3.3	3.3	3.2	3.3	3.3	3.5	3.6	3.9	3.8	3.8	3.8	3.9	4.4	4.3	4.3	4.4	4.5	4.5	4.6	4.8
XZ009	申扎县	2019-11-13 23:00:00	0	1	1.7	2.3	2.9	3.2	3.3	3.2	3.3	3.3	3.3	3.3	3.3	3.4	3.3	3.4	3.3	3.6	3.7	4	3.9	3.8	3.8	3.9	4.4	4.3	4.3	4.4	4.5	4.5	4.6	4.8
XZ009	申扎县	2019-11-14 00:00:00	0	0.6	1.3	1.9	2.5	2.8	3	3	3.1	3.3	3.3	3.3	3.3	3.5	3.4	3.5	3.4	3.6	3.8	4	3.9	3.9	3.8	3.9	4.4	4.3	4.3	4.4	4.5	4.5	4.6	4.8
XZ009	申扎县	2019-11-14 01:00:00	-0.4	0.3	1	1.5	2.1	2.6	2.8	2.9	3	3.2	3.2	3.3	3.3	3.5	3.5	3.5	3.5	3.6	3.8	4	3.9	3.9	3.9	4	4.4	4.3	4.3	4.4	4.5	4.5	4.6	4.8
XZ009	申扎县	2019-11-14 02:00:00	-0.9	0.1	0.7	1.3	1.9	2.3	2.6	2.7	2.9	3.1	3.1	3.2	3.3	3.5	3.5	3.5	3.5	3.7	3.8	4.1	4	3.9	3.9	4	4.4	4.3	4.3	4.4	4.5	4.4	4.6	4.8
XZ009	申扎县	2019-11-14 03:00:00	-1.4	0	0.5	1	1.7	2.1	2.5	2.6	2.8	3	3	3.1	3.3	3.5	3.5	3.6	3.5	3.8	3.8	4.1	4	4	3.9	4	4.5	4.3	4.3	4.4	4.5	4.4	4.6	4.8
XZ009	申扎县	2019-11-14 04:00:00	-1.9	-0.4	0.3	0.8	1.5	2	2.3	2.4	2.6	2.9	2.9	3	3.2	3.4	3.5	3.6	3.5	3.8	3.9	4.1	4	4	3.9	4	4.4	4.3	4.3	4.4	4.5	4.4	4.6	4.7
XZ009	申扎县	2019-11-14 05:00:00	-2.4	-0.8	0	0.6	1.3	1.8	2.1	2.2	2.5	2.8	2.8	3	3.1	3.4	3.4	3.6	3.5	3.8	3.9	4.1	4	4	3.9	4	4.5	4.3	4.3	4.4	4.5	4.4	4.5	4.8
XZ009	申扎县	2019-11-14 06:00:00	-2.7	-1.1	0	0.5	1.1	1.6	2	2.1	2.4	2.6	2.6	2.9	3.1	3.3	3.4	3.5	3.5	3.8	3.9	4.1	4	4	4	4	4.5	4.3	4.3	4.4	4.5	4.4	4.6	4.7
XZ009	申扎县	2019-11-14 07:00:00	-3.2	-1.5	-0.2	0.3	1	1.5	1.8	2	2.3	2.6	2.6	2.8	3	3.3	3.3	3.5	3.5	3.8	3.9	4.1	4	4	4	4	4.5	4.3	4.3	4.4	4.5	4.5	4.6	4.7
XZ009	申扎县	2019-11-14 08:00:00	-3.4	-1.8	-0.5	0.1	0.9	1.4	1.7	1.9	2.1	2.5	2.5	2.7	2.9	3.3	3.3	3.5	3.5	3.7	3.8	4.1	4	4	4	4	4.5	4.3	4.3	4.4	4.5	4.4	4.6	4.8
XZ009	申扎县	2019-11-14 09:00:00	-3.7	-2.1	-0.8	0	0.8	1.2	1.5	1.8	2	2.4	2.4	2.6	2.8	3.2	3.3	3.5	3.4	3.6	3.8	4.1	4	4	4	4	4.5	4.3	4.3	4.4	4.5	4.5	4.6	4.8
XZ009	申扎县	2019-11-14 10:00:00	-2.4	-1.9	-0.9	0	0.6	1.1	1.5	1.6	1.9	2.3	2.3	2.5	2.7	3.1	3.2	3.4	3.4	3.6	3.8	4	4	4	4	4	4.5	4.3	4.3	4.4	4.5	4.4	4.6	4.8
XZ009	申扎县	2019-11-14 11:00:00	-0.2	-0.7	-0.5	0	0.5	1	1.3	1.5	1.8	2.1	2.1	2.4	2.6	3.1	3.1	3.3	3.3	3.6	3.8	4	4	4	4	4	4.5	4.3	4.3	4.4	4.5	4.4	4.6	4.8
XZ009	申扎县	2019-11-14 12:00:00	1.1	0	-0.1	0	0.6	1	1.2	1.5	1.7	2	2	2.3	2.5	3	3.1	3.3	3.3	3.6	3.8	4	4	3.9	3.9	4	4.4	4.3	4.3	4.4	4.5	4.4	4.6	4.8
XZ009	申扎县	2019-11-14 13:00:00	3.6	0.8	0	0.1	0.6	1	1.2	1.4	1.6	2	2	2.3	2.5	3	3	3.2	3.2	3.5	3.7	4	3.9	3.9	3.9	4	4.4	4.3	4.3	4.4	4.5	4.4	4.6	4.8
XZ009	申扎县	2019-11-14 14:00:00	5	2.6	0.6	0.2	0.6	1	1.2	1.3	1.6	1.9	1.9	2.1	2.5	2.9	3	3.2	3.2	3.5	3.6	4	3.9	3.9	3.9	4	4.4	4.3	4.3	4.4	4.5	4.4	4.6	4.8
XZ009	申扎县	2019-11-14 15:00:00	4.3	2.8	1.5	0.6	0.7	1	1.1	1.3	1.5	1.8	1.8	2.1	2.4	2.8	3	3.1	3.1	3.5	3.6	3.9	3.8	3.8	3.8	3.9	4.4	4.2	4.3	4.4	4.5	4.4	4.5	4.7
XZ009	申扎县	2019-11-14 16:00:00	6.1	4.4	3.1	2.1	1.7	1.5	1.4	1.4	1.6	1.8	1.8	2.1	2.3	2.8	2.9	3.1	3.1	3.4	3.6	3.8	3.8	3.8	3.8	3.9	4.4	4.2	4.2	4.3	4.5	4.4	4.5	4.7
XZ009	申扎县	2019-11-14 17:00:00	7	5.7	4.5	3.5	2.8	2.3	2	1.8	1.8	2	2	2.1	2.3	2.8	2.8	3	3	3.4	3.6	3.8	3.8	3.8	3.8	3.9	4.3	4.2	4.2	4.3	4.5	4.4	4.5	4.7
XZ009	申扎县	2019-11-14 18:00:00	5.8	5.4	4.8	4.1	3.5	3	2.5	2.2	2.1	2.2	2.2	2.3	2.4	2.8	2.8	3	3	3.3	3.5	3.8	3.8	3.8	3.8	3.8	4.3	4.2	4.2	4.3	4.5	4.4	4.5	4.7
XZ009	申扎县	2019-11-14 19:00:00	5	4.9	4.5	4.1	3.8	3.3	3	2.6	2.5	2.5	2.5	2.5	2.6	2.8	2.8	3	3	3.3	3.5	3.8	3.7	3.8	3.8	3.8	4.3	4.2	4.2	4.3	4.4	4.3	4.5	4.7
XZ009	申扎县	2019-11-14 20:00:00	3.6	3.9	4	3.8	3.8	3.5	3.1	2.8	2.8	2.7	2.7	2.7	2.7	2.9	2.9	3	3	3.3	3.5	3.8	3.7	3.7	3.7	3.8	4.3	4.1	4.1	4.3	4.4	4.3	4.5	4.7
XZ009	申扎县	2019-11-14 21:00:00	2.3	3	3.3	3.4	3.5	3.5	3.2	3	2.9	2.9	2.9	2.8	2.9	3	3	3.1	3	3.3	3.5	3.8	3.7	3.7	3.7	3.8	4.3	4.1	4.1	4.3	4.4	4.3	4.5	4.7
XZ009	申扎县	2019-11-14 22:00:00	1.2	1.9	2.4	2.8	3.1	3.2	3.1	3	3	3	3	3	3	3.1	3	3.2	3.1	3.4	3.5	3.8	3.7	3.7	3.7	3.8	4.3	4.1	4.1	4.3	4.4	4.3	4.5	4.6
XZ009	申扎县	2019-11-14 23:00:00	1.1	1.6	2	2.3	2.8	3	3	3	3	3	3	3	3.1	3.1	3.1	3.3	3.1	3.4	3.6	3.8	3.7	3.7	3.7	3.8	4.3	4.1	4.1	4.3	4.3	4.3	4.5	4.6
XZ009	申扎县	2019-11-15 00:00:00	0.8	1.3	1.7	2.1	2.5	2.8	2.9	2.8	2.9	3	3	3.1	3.1	3.2	3.2	3.3	3.2	3.5	3.6	3.8	3.7	3.7	3.7	3.8	4.3	4.1	4.1	4.3	4.3	4.3	4.5	4.6
XZ009	申扎县	2019-11-15 01:00:00	0.3	1	1.4	1.8	2.3	2.6	2.7	2.8	2.8	3	3	3.1	3.1	3.3	3.2	3.3	3.3	3.5	3.6	3.9	3.8	3.7	3.8	3.8	4.3	4.1	4.1	4.3	4.3	4.3	4.5	4.6
XZ009	申扎县	2019-11-15 02:00:00	0	0.5	1	1.5	2	2.4	2.6	2.6	2.8	3	3	3	3.1	3.3	3.3	3.3	3.3	3.5	3.6	3.9	3.8	3.8	3.8	3.8	4.3	4.1	4.1	4.3	4.3	4.3	4.4	4.6
XZ009	申扎县	2019-11-15 03:00:00	-0.2	0.3	0.8	1.3	1.8	2.2	2.4	2.5	2.6	2.8	2.8	3	3.1	3.3	3.3	3.4	3.3	3.6	3.7	3.9	3.8	3.8	3.8	3.8	4.3	4.1	4.1	4.2	4.3	4.3	4.5	4.6
XZ009	申扎县	2019-11-15 04:00:00	-0.4	0.1	0.6	1.1	1.6	2	2.3	2.3	2.6	2.8	2.8	3	3.1	3.3	3.3	3.4	3.3	3.6	3.7	3.9	3.8	3.8	3.8	3.8	4.3	4.1	4.1	4.2	4.3	4.3	4.5	4.6
XZ009	申扎县	2019-11-15 05:00:00	-0.4	0.1	0.5	1	1.5	1.9	2.1	2.3	2.5	2.7	2.7	2.9	3	3.3	3.3	3.4	3.3	3.6	3.7	3.9	3.8	3.8	3.8	3.8	4.3	4.1	4.1	4.3	4.3	4.3	4.5	4.6
XZ009	申扎县	2019-11-15 06:00:00	-0.6	0	0.4	0.8	1.4	1.8	2	2.1	2.4	2.6	2.6	2.8	3	3.2	3.3	3.4	3.3	3.6	3.7	4	3.8	3.8	3.8	3.8	4.3	4.1	4.1	4.3	4.3	4.3	4.5	4.6
XZ009	申扎县	2019-11-15 07:00:00	-0.7	0	0.3	0.8	1.3	1.7	2	2.1	2.3	2.5	2.5	2.7	2.9	3.2	3.3	3.4	3.3	3.6	3.7	4	3.8	3.8	3.8	3.8	4.3	4.1	4.1	4.3	4.3	4.3	4.4	4.6
XZ009	申扎县	2019-11-15 08:00:00	-1.2	-0.2	0.2	0.6	1.2	1.6	1.8	2	2.2	2.5	2.5	2.6	2.8	3.1	3.2	3.3	3.3	3.6	3.7	4	3.8	3.8	3.8	3.8	4.3	4.1	4.1	4.3	4.3	4.3	4.5	4.6
XZ009	申扎县	2019-11-15 09:00:00	-1.5	-0.4	0.1	0.5	1.1	1.5	1.8	1.9	2.1	2.4	2.4	2.6	2.8	3.1	3.1	3.3	3.3	3.6	3.7	4	3.8	3.8	3.8	3.8	4.3	4.1	4.1	4.3	4.3	4.3	4.5	4.6
XZ009	申扎县	2019-11-15 10:00:00	-0.2	-0.1	0.1	0.5	1.1	1.4	1.6	1.8	2	2.3	2.3	2.5	2.7	3.1	3.1	3.3	3.3	3.5	3.7	3.9	3.8	3.8	3.8	3.8	4.3	4.1	4.1	4.3	4.3	4.3	4.5	4.6
XZ009	申扎县	2019-11-15 11:00:00	0	0	0.1	0.5	1	1.3	1.6	1.7	2	2.2	2.2	2.5	2.6	3	3.1	3.3	3.2	3.5	3.6	3.9	3.8	3.8	3.8	3.8	4.3	4.1	4.1	4.3	4.3	4.3	4.4	4.6
XZ009	申扎县	2019-11-15 12:00:00	0.6	0.1	0.2	0.5	1	1.3	1.6	1.6	1.9	2.2	2.2	2.4	2.6	3	3.1	3.2	3.2	3.5	3.6	3.9	3.8	3.8	3.8	3.8	4.3	4.1	4.1	4.3	4.3	4.3	4.5	4.6
XZ009	申扎县	2019-11-15 13:00:00	2.6	0.6	0.3	0.5	1	1.3	1.5	1.6	1.8	2.1	2.1	2.3	2.5	3	3	3.2	3.1	3.5	3.6	3.9	3.8	3.8	3.8	3.8	4.3	4.1	4.1	4.3	4.3	4.3	4.4	4.6
XZ009	申扎县	2019-11-15 14:00:00	5.3	3.2	2	1.3	1.3	1.4	1.5	1.6	1.8	2.1	2.1	2.3	2.5	2.9	3	3.1	3.1	3.4	3.6	3.9	3.8	3.8	3.8	3.8	4.3	4.1	4.1	4.3	4.3	4.3	4.5	4.6
XZ009	申扎县	2019-11-15 15:00:00	7.6	5.8	4.2	3.1	2.5	2.1	1.9	1.8	1.9	2.1	2.1	2.3	2.5	2.8	2.9	3.1	3.1	3.4	3.6	3.8	3.8	3.8	3.8	3.8	4.3	4.1	4.1	4.2	4.3	4.3	4.4	4.6
XZ009	申扎县	2019-11-15 16:00:00	8.2	7	5.8	4.5	3.7	3	2.5	2.2	2.1	2.3	2.3	2.3	2.5	2.8	2.9	3.1	3.1	3.4	3.5	3.8	3.7	3.7	3.7	3.8	4.3	4.1	4.1	4.3	4.3	4.3	4.4	4.6
XZ009	申扎县	2019-11-15 17:00:00	7.5	6.8	6.1	5.1	4.5	3.8	3.2	2.8	2.6	2.6	2.6	2.6	2.6	2.9	2.9	3.1	3.1	3.3	3.5	3.8	3.7	3.7	3.7	3.8	4.3	4.1	4.1	4.2	4.3	4.3	4.4	4.6
XZ009	申扎县	2019-11-15 18:00:00	7.5	6.8	6.1	5.4	4.8	4.2	3.6	3.2	3	2.9	2.9	2.8	2.8	3	3	3.1	3.1	3.3	3.5	3.8	3.7	3.7	3.7	3.8	4.3	4.1	4.1	4.2	4.3	4.3	4.4	4.6
XZ009	申扎县	2019-11-15 19:00:00	6.1	6.2	6	5.5	5	4.5	4	3.5	3.3	3.1	3.1	3.1	3	3.1	3	3.1	3.1	3.3	3.5	3.8	3.7	3.7	3.7	3.8	4.2	4.1	4.1	4.2	4.3	4.3	4.4	4.6
XZ009	申扎县	2019-11-15 20:00:00	4.2	4.8	5	5	4.9	4.6	4.1	3.8	3.5	3.4	3.4	3.3	3.2	3.2	3.1	3.3	3.1	3.4	3.5	3.8	3.7	3.7	3.7	3.8	4.2	4.1	4.1	4.2	4.3	4.2	4.4	4.6
XZ009	申扎县	2019-11-15 21:00:00	2.6	3.5	4	4.3	4.5	4.3	4.1	3.8	3.7	3.6	3.6	3.5	3.4	3.3	3.3	3.3	3.3	3.5	3.6	3.8	3.7	3.6	3.7	3.8	4.2	4.1	4.1	4.2	4.3	4.3	4.4	4.5
XZ009	申扎县	2019-11-15 22:00:00	1.2	2.3	3	3.5	3.9	4	4	3.8	3.7	3.6	3.6	3.6	3.5	3.5	3.3	3.5	3.3	3.5	3.6	3.8	3.8	3.7	3.7	3.8	4.2	4.1	4.1	4.2	4.3	4.2	4.4	4.6
XZ009	申扎县	2019-11-15 23:00:00	0.2	1.3	2.1	2.8	3.3	3.6	3.7	3.6	3.6	3.6	3.6	3.6	3.6	3.6	3.5	3.5	3.3	3.6	3.7	3.9	3.8	3.8	3.7	3.8	4.2	4.1	4.1	4.2	4.3	4.2	4.4	4.6
XZ009	申扎县	2019-11-16 00:00:00	-0.1	0.7	1.5	2.1	2.8	3.3	3.4	3.4	3.5	3.6	3.6	3.6	3.6	3.6	3.5	3.6	3.4	3.6	3.7	3.9	3.8	3.8	3.7	3.8	4.3	4.1	4.1	4.2	4.3	4.2	4.4	4.5
XZ009	申扎县	2019-11-16 01:00:00	-0.4	0.5	1.1	1.8	2.5	2.9	3.1	3.2	3.3	3.5	3.5	3.5	3.6	3.6	3.6	3.6	3.5	3.7	3.8	4	3.8	3.8	3.8	3.8	4.3	4.1	4.1	4.2	4.3	4.2	4.4	4.5
XZ009	申扎县	2019-11-16 02:00:00	-0.7	0.1	0.8	1.5	2.1	2.6	2.8	3	3.1	3.3	3.3	3.5	3.5	3.6	3.6	3.6	3.5	3.8	3.8	4	3.9	3.8	3.8	3.8	4.3	4.1	4.1	4.2	4.3	4.3	4.4	4.6
XZ009	申扎县	2019-11-16 03:00:00	-0.9	0	0.6	1.2	1.9	2.3	2.6	2.8	3	3.2	3.2	3.3	3.5	3.6	3.6	3.6	3.6	3.8	3.8	4	3.9	3.9	3.8	3.8	4.3	4.1	4.1	4.2	4.3	4.3	4.4	4.5
XZ009	申扎县	2019-11-16 04:00:00	-1.2	0	0.4	1	1.7	2.1	2.5	2.6	2.8	3.1	3.1	3.2	3.4	3.6	3.6	3.6	3.6	3.8	3.9	4.1	4	3.9	3.8	3.9	4.3	4.1	4.1	4.2	4.3	4.3	4.4	4.6
XZ009	申扎县	2019-11-16 05:00:00	-1.2	-0.2	0.3	0.8	1.5	2	2.3	2.5	2.7	3	3	3.1	3.3	3.5	3.5	3.6	3.6	3.8	3.9	4.1	4	3.9	3.8	3.9	4.3	4.1	4.1	4.3	4.3	4.2	4.4	4.6
XZ009	申扎县	2019-11-16 06:00:00	-1.5	-0.4	0.1	0.7	1.3	1.8	2.1	2.3	2.5	2.8	2.8	3	3.2	3.5	3.5	3.6	3.5	3.8	3.9	4.1	4	3.9	3.9	3.9	4.3	4.1	4.1	4.3	4.3	4.3	4.4	4.6
XZ009	申扎县	2019-11-16 07:00:00	-1.6	-0.5	0	0.6	1.2	1.6	2	2.1	2.4	2.7	2.7	2.9	3.1	3.4	3.5	3.6	3.5	3.8	3.8	4.1	4	4	3.9	3.9	4.3	4.2	4.1	4.3	4.3	4.3	4.4	4.6
XZ009	申扎县	2019-11-16 08:00:00	-1.9	-0.7	0	0.5	1.1	1.5	1.8	2	2.3	2.6	2.6	2.8	3	3.3	3.3	3.5	3.5	3.8	3.8	4.1	4	3.9	3.9	3.9	4.3	4.2	4.1	4.3	4.3	4.3	4.4	4.6
XZ009	申扎县	2019-11-16 09:00:00	-2.2	-1	-0.1	0.3	1	1.4	1.8	2	2.2	2.5	2.5	2.7	3	3.3	3.3	3.5	3.5	3.7	3.8	4.1	4	3.9	3.9	3.9	4.4	4.2	4.1	4.3	4.3	4.3	4.4	4.6
XZ009	申扎县	2019-11-16 10:00:00	-1	-0.8	-0.2	0.3	0.9	1.3	1.6	1.8	2.1	2.4	2.4	2.6	2.8	3.2	3.3	3.4	3.4	3.6	3.8	4	4	3.9	3.9	3.9	4.4	4.2	4.1	4.3	4.3	4.3	4.4	4.6
XZ009	申扎县	2019-11-16 11:00:00	0	-0.2	0	0.3	0.8	1.3	1.5	1.7	2	2.3	2.3	2.5	2.8	3.1	3.2	3.4	3.3	3.6	3.8	4	3.9	3.9	3.9	3.9	4.3	4.2	4.2	4.3	4.3	4.3	4.4	4.6
XZ009	申扎县	2019-11-16 12:00:00	1	0	0	0.3	0.8	1.2	1.5	1.6	1.9	2.2	2.2	2.5	2.7	3.1	3.1	3.3	3.3	3.6	3.8	4	3.9	3.9	3.9	3.9	4.4	4.2	4.1	4.3	4.3	4.3	4.4	4.6
XZ009	申扎县	2019-11-16 13:00:00	2.4	0.6	0.1	0.3	0.8	1.2	1.4	1.6	1.8	2.1	2.1	2.3	2.6	3	3.1	3.3	3.3	3.6	3.7	4	3.9	3.8	3.8	3.9	4.3	4.1	4.1	4.3	4.3	4.3	4.4	4.6
XZ009	申扎县	2019-11-16 14:00:00	4.3	2.1	0.6	0.5	0.8	1.1	1.4	1.5	1.8	2.1	2.1	2.3	2.5	3	3.1	3.2	3.2	3.5	3.6	3.9	3.8	3.8	3.8	3.9	4.3	4.1	4.1	4.3	4.3	4.3	4.4	4.6
XZ009	申扎县	2019-11-16 15:00:00	4.7	3.6	2.6	1.8	1.6	1.5	1.5	1.5	1.8	2	2	2.3	2.5	2.9	3	3.2	3.2	3.5	3.6	3.9	3.8	3.8	3.8	3.9	4.3	4.1	4.1	4.3	4.3	4.3	4.4	4.6
XZ009	申扎县	2019-11-16 16:00:00	4.3	3.8	3.2	2.6	2.4	2.1	2	1.8	1.9	2.1	2.1	2.3	2.5	2.8	3	3.1	3.1	3.5	3.6	3.8	3.8	3.8	3.8	3.8	4.3	4.1	4.1	4.3	4.3	4.3	4.4	4.6
XZ009	申扎县	2019-11-16 17:00:00	4.3	3.9	3.4	3	2.8	2.5	2.3	2.1	2.1	2.2	2.2	2.3	2.5	2.8	2.9	3.1	3.1	3.4	3.6	3.8	3.8	3.8	3.8	3.8	4.3	4.1	4.1	4.2	4.3	4.3	4.4	4.6
XZ009	申扎县	2019-11-16 18:00:00	4.1	3.8	3.5	3.2	3	2.8	2.6	2.3	2.3	2.4	2.4	2.5	2.6	2.8	2.9	3.1	3.1	3.4	3.5	3.8	3.7	3.8	3.7	3.8	4.3	4.1	4.1	4.2	4.3	4.3	4.4	4.6
XZ009	申扎县	2019-11-16 19:00:00	3.6	3.6	3.5	3.3	3.2	3	2.8	2.6	2.5	2.6	2.6	2.6	2.7	2.9	3	3.1	3.1	3.3	3.5	3.8	3.7	3.7	3.7	3.8	4.3	4.1	4.1	4.2	4.3	4.3	4.4	4.6
XZ009	申扎县	2019-11-16 20:00:00	2.3	2.8	3	3	3.1	3.1	2.9	2.7	2.7	2.7	2.7	2.8	2.8	3	3	3.1	3.1	3.4	3.5	3.8	3.7	3.7	3.7	3.8	4.2	4.1	4.1	4.2	4.3	4.3	4.4	4.6
XZ009	申扎县	2019-11-16 21:00:00	1.5	2	2.4	2.6	2.9	3	2.9	2.8	2.8	2.8	2.8	2.8	2.9	3	3.1	3.1	3.1	3.4	3.5	3.8	3.7	3.7	3.7	3.7	4.2	4.1	4.1	4.2	4.3	4.2	4.3	4.5
XZ009	申扎县	2019-11-16 22:00:00	0.5	1.3	1.8	2.2	2.6	2.8	2.8	2.8	2.8	2.9	2.9	2.9	3	3.1	3.1	3.2	3.1	3.4	3.5	3.8	3.7	3.7	3.7	3.8	4.2	4.1	4.1	4.2	4.3	4.2	4.4	4.5
XZ009	申扎县	2019-11-16 23:00:00	0	0.6	1.2	1.7	2.3	2.6	2.7	2.7	2.8	2.9	2.9	3	3	3.1	3.1	3.3	3.1	3.5	3.6	3.8	3.7	3.7	3.7	3.8	4.2	4	4	4.1	4.3	4.2	4.3	4.5
XZ009	申扎县	2019-11-17 00:00:00	0	0.4	0.9	1.3	2	2.3	2.5	2.6	2.6	2.8	2.8	2.9	3	3.2	3.1	3.3	3.2	3.5	3.6	3.8	3.7	3.7	3.7	3.7	4.2	4.1	4	4.1	4.3	4.2	4.3	4.5
XZ009	申扎县	2019-11-17 01:00:00	0	0.4	0.8	1.2	1.8	2.1	2.3	2.4	2.6	2.8	2.8	2.9	3	3.2	3.2	3.3	3.2	3.5	3.6	3.8	3.7	3.7	3.7	3.8	4.2	4	4	4.1	4.3	4.2	4.3	4.5
XZ009	申扎县	2019-11-17 02:00:00	-0.2	0.2	0.6	1.1	1.6	2	2.2	2.3	2.5	2.7	2.7	2.8	3	3.2	3.2	3.3	3.2	3.5	3.6	3.8	3.8	3.7	3.7	3.8	4.2	4	4	4.1	4.3	4.1	4.3	4.5
XZ009	申扎县	2019-11-17 03:00:00	-0.5	0.1	0.5	1	1.5	1.8	2.1	2.2	2.4	2.6	2.6	2.8	3	3.2	3.2	3.3	3.3	3.5	3.6	3.8	3.8	3.7	3.7	3.8	4.2	4	4	4.1	4.3	4.2	4.3	4.5
XZ009	申扎县	2019-11-17 04:00:00	-0.8	0	0.4	0.8	1.4	1.8	2	2.1	2.3	2.5	2.5	2.7	2.9	3.1	3.1	3.3	3.3	3.5	3.6	3.8	3.8	3.7	3.7	3.8	4.2	4.1	4	4.1	4.3	4.2	4.3	4.5
XZ009	申扎县	2019-11-17 05:00:00	-1.2	-0.1	0.3	0.7	1.3	1.6	1.9	2	2.2	2.5	2.5	2.6	2.8	3.1	3.1	3.3	3.2	3.5	3.6	3.8	3.8	3.7	3.7	3.8	4.2	4.1	4	4.1	4.3	4.2	4.3	4.5
XZ009	申扎县	2019-11-17 06:00:00	-1.5	-0.4	0.1	0.6	1.1	1.5	1.8	1.9	2.1	2.4	2.4	2.6	2.8	3.1	3.1	3.3	3.2	3.5	3.6	3.8	3.8	3.7	3.7	3.8	4.2	4.1	4.1	4.1	4.3	4.2	4.3	4.5
XZ009	申扎县	2019-11-17 07:00:00	-2	-0.7	0	0.5	1.1	1.5	1.7	1.8	2	2.3	2.3	2.5	2.7	3	3.1	3.2	3.2	3.5	3.6	3.8	3.8	3.7	3.7	3.8	4.2	4	4.1	4.1	4.3	4.2	4.3	4.5
XZ009	申扎县	2019-11-17 08:00:00	-2.4	-0.9	0	0.4	1	1.3	1.6	1.8	2	2.3	2.3	2.5	2.6	3	3.1	3.2	3.1	3.5	3.6	3.8	3.8	3.7	3.7	3.8	4.2	4.1	4	4.1	4.2	4.2	4.3	4.5
XZ009	申扎县	2019-11-17 09:00:00	-2.5	-1.2	-0.2	0.3	0.9	1.3	1.5	1.6	1.9	2.1	2.1	2.4	2.6	3	3	3.2	3.1	3.5	3.6	3.8	3.8	3.7	3.7	3.8	4.2	4	4	4.1	4.2	4.1	4.3	4.5
XZ009	申扎县	2019-11-17 10:00:00	-1.6	-1	-0.3	0.1	0.8	1.1	1.4	1.6	1.8	2.1	2.1	2.3	2.5	2.9	3	3.1	3.1	3.4	3.6	3.8	3.7	3.7	3.7	3.8	4.2	4	4	4.1	4.3	4.2	4.3	4.5
XZ009	申扎县	2019-11-17 11:00:00	-0.2	-0.4	-0.1	0.1	0.7	1.1	1.3	1.5	1.8	2	2	2.3	2.5	2.8	3	3.1	3.1	3.4	3.5	3.8	3.7	3.7	3.7	3.7	4.2	4	4	4.1	4.2	4.2	4.3	4.5
XZ009	申扎县	2019-11-17 12:00:00	0.7	0	0	0.1	0.6	1	1.3	1.5	1.7	2	2	2.2	2.4	2.8	2.9	3.1	3.1	3.3	3.5	3.7	3.7	3.6	3.7	3.7	4.2	4	4	4.1	4.2	4.1	4.3	4.5
XZ009	申扎县	2019-11-17 13:00:00	2.1	0.4	0.1	0.2	0.7	1	1.3	1.3	1.6	1.9	1.9	2.1	2.4	2.8	2.8	3	3	3.3	3.5	3.7	3.6	3.6	3.6	3.7	4.1	4	4	4.1	4.2	4.1	4.3	4.5
XZ009	申扎县	2019-11-17 14:00:00	4	1.9	0.4	0.3	0.7	1	1.2	1.3	1.6	1.8	1.8	2.1	2.3	2.7	2.8	3	3	3.3	3.5	3.7	3.6	3.6	3.6	3.7	4.1	4	4	4.1	4.2	4.1	4.3	4.5
XZ009	申扎县	2019-11-17 15:00:00	4.3	2.8	1.7	1.1	1	1.1	1.2	1.3	1.5	1.8	1.8	2	2.3	2.6	2.8	3	3	3.3	3.4	3.7	3.6	3.6	3.6	3.7	4.1	4	4	4.1	4.2	4.1	4.3	4.5
XZ009	申扎县	2019-11-17 16:00:00	5.8	4.3	3.1	2.3	2	1.7	1.6	1.5	1.6	1.8	1.8	2	2.3	2.6	2.7	2.9	2.9	3.2	3.4	3.6	3.6	3.6	3.6	3.6	4.1	4	4	4.1	4.2	4.1	4.3	4.5
XZ009	申扎县	2019-11-17 17:00:00	6.3	5.3	4.4	3.5	2.9	2.4	2.1	1.8	1.8	2	2	2.1	2.3	2.6	2.7	2.9	2.9	3.2	3.4	3.6	3.6	3.6	3.6	3.6	4.1	4	4	4.1	4.2	4.1	4.3	4.5
XZ009	申扎县	2019-11-17 18:00:00	5.7	5.3	4.7	4	3.6	3	2.6	2.3	2.2	2.2	2.2	2.3	2.4	2.6	2.7	2.9	2.8	3.1	3.3	3.6	3.5	3.5	3.6	3.6	4.1	4	4	4.1	4.2	4.1	4.3	4.5
XZ009	申扎县	2019-11-17 19:00:00	4.2	4.5	4.3	4	3.8	3.4	3	2.6	2.5	2.5	2.5	2.5	2.5	2.7	2.7	2.9	2.9	3.1	3.3	3.6	3.5	3.5	3.5	3.6	4.1	4	4	4.1	4.1	4.1	4.3	4.5
XZ009	申扎县	2019-11-17 20:00:00	2	2.9	3.3	3.5	3.6	3.4	3.1	2.8	2.7	2.7	2.7	2.6	2.6	2.8	2.8	2.9	2.9	3.1	3.3	3.6	3.5	3.5	3.5	3.6	4.1	3.9	4	4.1	4.1	4.1	4.3	4.5
XZ009	申扎县	2019-11-17 21:00:00	0.1	1.3	2.1	2.6	3	3.1	3.1	2.9	2.8	2.8	2.8	2.8	2.8	2.9	2.9	3	2.9	3.2	3.3	3.6	3.5	3.5	3.5	3.6	4.1	4	4	4.1	4.1	4.1	4.3	4.5
XZ009	申扎县	2019-11-17 22:00:00	-0.4	0.6	1.3	1.9	2.5	2.8	2.9	2.8	2.8	2.9	2.9	2.9	3	3	3	3.1	3	3.2	3.4	3.6	3.5	3.5	3.5	3.6	4	3.9	3.9	4	4.1	4.1	4.2	4.4
XZ009	申扎县	2019-11-17 23:00:00	-1	0.1	0.8	1.4	2.1	2.5	2.6	2.6	2.7	2.8	2.8	2.9	3	3	3	3.1	3	3.3	3.4	3.6	3.5	3.5	3.5	3.6	4	3.9	3.9	4	4.1	4.1	4.2	4.4
XZ009	申扎县	2019-11-18 00:00:00	-1.5	0	0.5	1.1	1.7	2.1	2.4	2.5	2.6	2.8	2.8	2.9	3	3.1	3.1	3.1	3.1	3.3	3.5	3.6	3.6	3.5	3.5	3.6	4.1	3.9	3.9	4	4.1	4.1	4.2	4.4
XZ009	申扎县	2019-11-18 01:00:00	-2.1	-0.5	0.3	0.8	1.5	2	2.2	2.3	2.5	2.6	2.6	2.8	2.9	3.1	3.1	3.1	3.1	3.3	3.5	3.7	3.6	3.5	3.5	3.6	4	3.9	3.9	4	4.1	4.1	4.2	4.4
XZ009	申扎县	2019-11-18 02:00:00	-2.5	-0.9	0	0.6	1.3	1.7	2	2.1	2.3	2.6	2.6	2.7	2.8	3.1	3.1	3.2	3.1	3.3	3.5	3.6	3.6	3.6	3.5	3.6	4.1	3.9	3.9	4	4.1	4.1	4.2	4.4
XZ009	申扎县	2019-11-18 03:00:00	-2.9	-1.2	0	0.5	1.1	1.6	1.8	2	2.2	2.5	2.5	2.6	2.8	3	3	3.2	3.1	3.3	3.5	3.7	3.6	3.6	3.6	3.6	4.1	3.9	3.9	4	4.1	4.1	4.2	4.4
XZ009	申扎县	2019-11-18 04:00:00	-3.4	-1.6	-0.3	0.3	1	1.4	1.7	1.8	2.1	2.4	2.4	2.6	2.7	3	3	3.1	3.1	3.4	3.5	3.7	3.6	3.6	3.6	3.6	4.1	3.9	3.9	4	4.1	4.1	4.2	4.4
XZ009	申扎县	2019-11-18 05:00:00	-3.9	-2	-0.7	0.1	0.8	1.3	1.6	1.7	2	2.3	2.3	2.5	2.6	3	3	3.1	3.1	3.4	3.5	3.7	3.6	3.6	3.6	3.6	4.1	3.9	3.9	4	4.1	4	4.2	4.4
XZ009	申扎县	2019-11-18 06:00:00	-4.4	-2.5	-1	0	0.6	1.1	1.5	1.6	1.9	2.1	2.1	2.4	2.6	2.9	3	3.1	3.1	3.3	3.5	3.7	3.6	3.6	3.6	3.6	4.1	4	3.9	4	4.1	4.1	4.2	4.4
XZ009	申扎县	2019-11-18 07:00:00	-4.9	-3	-1.4	-0.2	0.5	1	1.3	1.5	1.7	2	2	2.3	2.5	2.9	2.9	3.1	3	3.3	3.5	3.7	3.6	3.6	3.6	3.6	4.1	3.9	3.9	4	4.1	4.1	4.2	4.4
XZ009	申扎县	2019-11-18 08:00:00	-5.4	-3.4	-1.9	-0.5	0.3	0.8	1.1	1.3	1.6	2	2	2.2	2.5	2.8	2.8	3	3	3.3	3.5	3.7	3.6	3.6	3.6	3.6	4.1	3.9	3.9	4	4.1	4	4.2	4.4
XZ009	申扎县	2019-11-18 09:00:00	-5.9	-3.9	-2.2	-0.9	0.1	0.7	1	1.3	1.5	1.8	1.8	2.1	2.3	2.8	2.8	3	3	3.3	3.4	3.6	3.6	3.6	3.6	3.6	4.1	3.9	3.9	4	4.1	4.1	4.2	4.4
XZ009	申扎县	2019-11-18 10:00:00	-4.4	-3.6	-2.4	-1.2	0	0.5	0.9	1.1	1.5	1.8	1.8	2	2.3	2.7	2.8	3	3	3.2	3.4	3.6	3.6	3.5	3.5	3.6	4.1	3.9	3.9	4	4.1	4	4.2	4.4
XZ009	申扎县	2019-11-18 11:00:00	-1.5	-2	-1.7	-1	0	0.4	0.8	1	1.3	1.6	1.6	1.9	2.2	2.6	2.7	2.9	2.9	3.2	3.4	3.6	3.5	3.5	3.5	3.6	4.1	3.9	3.9	4	4.1	4.1	4.1	4.4
XZ009	申扎县	2019-11-18 12:00:00	0.3	-0.7	-0.9	-0.6	0	0.4	0.7	0.9	1.2	1.6	1.6	1.8	2.1	2.5	2.6	2.8	2.8	3.1	3.3	3.6	3.5	3.5	3.5	3.6	4	3.9	3.9	4	4.1	4	4.2	4.4
XZ009	申扎县	2019-11-18 13:00:00	2	0	-0.3	-0.3	0	0.4	0.7	0.8	1.1	1.5	1.5	1.8	2	2.5	2.6	2.8	2.8	3.1	3.3	3.5	3.5	3.5	3.5	3.6	4	3.9	3.9	4	4.1	4	4.2	4.3
XZ009	申扎县	2019-11-18 14:00:00	3	0.9	0	0	0.1	0.5	0.7	0.8	1.1	1.4	1.4	1.7	2	2.4	2.5	2.7	2.8	3.1	3.3	3.5	3.5	3.5	3.5	3.5	4	3.8	3.8	4	4.1	4	4.2	4.3
XZ009	申扎县	2019-11-18 15:00:00	3.9	1.8	0.3	0	0.2	0.5	0.7	0.8	1.1	1.4	1.4	1.6	1.9	2.4	2.5	2.7	2.7	3	3.2	3.5	3.5	3.4	3.5	3.5	4	3.8	3.8	4	4.1	4	4.1	4.3
XZ009	申扎县	2019-11-18 16:00:00	4.3	2.6	1	0.1	0.3	0.5	0.6	0.8	1	1.3	1.3	1.6	1.8	2.3	2.4	2.6	2.6	3	3.1	3.5	3.4	3.4	3.4	3.5	4	3.8	3.8	4	4.1	4	4.1	4.3
XZ009	申扎县	2019-11-18 17:00:00	4.3	3	1.7	0.5	0.3	0.5	0.7	0.8	1	1.3	1.3	1.6	1.8	2.3	2.4	2.6	2.6	3	3.1	3.4	3.3	3.4	3.4	3.5	4	3.8	3.8	4	4	4	4.1	4.3
XZ009	申扎县	2019-11-18 18:00:00	3.6	2.9	2	1.1	0.6	0.6	0.7	0.8	1	1.3	1.3	1.5	1.8	2.2	2.3	2.5	2.5	2.9	3.1	3.3	3.3	3.3	3.3	3.5	3.9	3.8	3.8	4	4	4	4.1	4.3
XZ009	申扎县	2019-11-18 19:00:00	2.3	2.1	1.9	1.5	1.3	1.1	1	1	1.1	1.3	1.3	1.5	1.8	2.2	2.3	2.5	2.5	2.8	3	3.3	3.3	3.3	3.3	3.5	3.9	3.8	3.8	3.9	4	4	4.1	4.3
XZ009	申扎县	2019-11-18 20:00:00	0.1	0.9	1.2	1.3	1.4	1.3	1.3	1.1	1.3	1.4	1.4	1.6	1.8	2.1	2.3	2.5	2.5	2.8	3	3.3	3.3	3.3	3.3	3.4	3.9	3.8	3.8	3.9	4	4	4.1	4.3
XZ009	申扎县	2019-11-18 21:00:00	-0.5	0.1	0.5	0.8	1.1	1.3	1.3	1.3	1.3	1.5	1.5	1.6	1.8	2.2	2.3	2.5	2.5	2.8	3	3.3	3.2	3.2	3.3	3.3	3.8	3.7	3.8	3.9	4	4	4.1	4.3
XZ009	申扎县	2019-11-18 22:00:00	-1.1	0	0.3	0.6	1	1.2	1.3	1.3	1.4	1.6	1.6	1.7	1.9	2.2	2.3	2.5	2.5	2.8	3	3.3	3.2	3.2	3.3	3.3	3.8	3.7	3.7	3.8	4	3.9	4.1	4.3
XZ009	申扎县	2019-11-18 23:00:00	-1.7	-0.3	0.1	0.5	0.9	1.1	1.3	1.3	1.4	1.6	1.6	1.8	2	2.3	2.3	2.5	2.5	2.8	3	3.2	3.2	3.2	3.3	3.3	3.8	3.7	3.7	3.8	4	3.9	4.1	4.3
XZ009	申扎县	2019-11-19 00:00:00	-2.3	-0.7	0	0.3	0.8	1.1	1.3	1.3	1.5	1.6	1.6	1.8	2	2.3	2.3	2.5	2.5	2.8	3	3.2	3.2	3.2	3.2	3.3	3.8	3.7	3.7	3.8	3.9	3.9	4	4.3
XZ009	申扎县	2019-11-19 01:00:00	-2.7	-1.1	0	0.3	0.7	1	1.1	1.3	1.5	1.6	1.6	1.8	2	2.3	2.3	2.5	2.5	2.8	3	3.2	3.2	3.2	3.2	3.3	3.8	3.6	3.7	3.8	3.9	3.9	4	4.2
XZ009	申扎县	2019-11-19 02:00:00	-3.2	-1.5	-0.4	0.1	0.6	1	1.1	1.2	1.4	1.6	1.6	1.8	2	2.3	2.4	2.5	2.5	2.8	3	3.2	3.1	3.2	3.2	3.3	3.8	3.6	3.6	3.8	3.9	3.9	4	4.2
XZ009	申扎县	2019-11-19 03:00:00	-3.5	-1.9	-0.6	0	0.6	0.9	1.1	1.1	1.3	1.6	1.6	1.8	2	2.3	2.3	2.5	2.5	2.8	3	3.2	3.2	3.2	3.2	3.3	3.8	3.6	3.6	3.8	3.9	3.8	4	4.2
XZ009	申扎县	2019-11-19 04:00:00	-4	-2.3	-1	0	0.5	0.8	1	1.1	1.3	1.5	1.5	1.8	2	2.3	2.3	2.5	2.5	2.8	3	3.2	3.1	3.1	3.2	3.3	3.8	3.6	3.6	3.8	3.9	3.8	4	4.2
XZ009	申扎县	2019-11-19 05:00:00	-4.6	-2.8	-1.4	-0.2	0.3	0.7	1	1	1.3	1.5	1.5	1.7	2	2.3	2.3	2.5	2.5	2.8	3	3.2	3.1	3.2	3.2	3.3	3.8	3.6	3.6	3.8	3.9	3.8	4	4.1
XZ009	申扎县	2019-11-19 06:00:00	-5.1	-3.2	-1.7	-0.5	0.2	0.6	0.8	1	1.2	1.5	1.5	1.7	1.9	2.3	2.3	2.5	2.5	2.8	3	3.2	3.1	3.1	3.2	3.3	3.8	3.6	3.6	3.8	3.8	3.8	4	4.2
XZ009	申扎县	2019-11-19 07:00:00	-5.6	-3.7	-2.2	-0.9	0	0.5	0.8	0.9	1.1	1.4	1.4	1.6	1.8	2.2	2.3	2.5	2.5	2.8	3	3.2	3.1	3.1	3.1	3.3	3.8	3.6	3.6	3.8	3.9	3.8	4	4.1
XZ009	申扎县	2019-11-19 08:00:00	-6.2	-4.2	-2.6	-1.2	0	0.4	0.7	0.8	1.1	1.4	1.4	1.6	1.8	2.2	2.3	2.5	2.5	2.8	3	3.2	3.1	3.1	3.1	3.3	3.7	3.6	3.6	3.8	3.8	3.8	4	4.1
XZ009	申扎县	2019-11-19 09:00:00	-6.7	-4.7	-3	-1.6	-0.3	0.3	0.6	0.8	1	1.3	1.3	1.5	1.8	2.1	2.3	2.5	2.4	2.8	3	3.2	3.1	3.1	3.1	3.2	3.7	3.6	3.6	3.8	3.8	3.8	4	4.1
XZ009	申扎县	2019-11-19 10:00:00	-5.2	-4.4	-3.3	-1.9	-0.5	0.1	0.5	0.7	1	1.2	1.2	1.5	1.7	2.1	2.2	2.4	2.4	2.7	2.9	3.1	3.1	3.1	3.1	3.2	3.7	3.6	3.6	3.7	3.8	3.8	4	4.1
XZ009	申扎县	2019-11-19 11:00:00	-2.2	-2.7	-2.5	-1.7	-0.6	0	0.5	0.6	0.9	1.1	1.1	1.4	1.6	2.1	2.2	2.4	2.4	2.7	2.9	3.1	3.1	3.1	3.1	3.2	3.7	3.6	3.6	3.7	3.8	3.8	4	4.1
XZ009	申扎县	2019-11-19 12:00:00	0	-1	-1.3	-1	-0.4	0	0.4	0.5	0.8	1.1	1.1	1.4	1.6	2	2.1	2.3	2.3	2.6	2.8	3.1	3.1	3.1	3.1	3.2	3.7	3.5	3.6	3.7	3.8	3.8	3.9	4.1
XZ009	申扎县	2019-11-19 13:00:00	1.5	0	-0.5	-0.5	-0.1	0.1	0.4	0.5	0.8	1.1	1.1	1.3	1.6	2	2.1	2.3	2.3	2.6	2.8	3.1	3.1	3.1	3.1	3.1	3.6	3.5	3.6	3.7	3.8	3.8	3.9	4.1
XZ009	申扎县	2019-11-19 14:00:00	2.5	0.5	-0.1	-0.2	0	0.2	0.4	0.5	0.8	1	1	1.3	1.5	2	2.1	2.3	2.3	2.6	2.8	3.1	3	3	3.1	3.1	3.6	3.5	3.5	3.7	3.8	3.8	3.9	4.1
XZ009	申扎县	2019-11-19 15:00:00	3.2	1.3	0	0	0	0.2	0.4	0.5	0.7	1	1	1.3	1.5	2	2	2.2	2.3	2.6	2.8	3.1	3	3	3.1	3.1	3.6	3.5	3.5	3.6	3.8	3.8	3.9	4.1
XZ009	申扎县	2019-11-19 16:00:00	3.7	2	0.5	0	0.1	0.3	0.4	0.5	0.7	1	1	1.2	1.5	1.9	2	2.2	2.2	2.6	2.8	3	3	3	3	3.1	3.6	3.5	3.5	3.6	3.8	3.7	3.9	4.1
XZ009	申扎县	2019-11-19 17:00:00	3.6	2.3	1	0.1	0.1	0.3	0.4	0.5	0.7	1	1	1.2	1.4	1.8	2	2.1	2.2	2.5	2.7	3	3	3	3	3.1	3.6	3.5	3.5	3.6	3.8	3.7	3.9	4.1
XZ009	申扎县	2019-11-19 18:00:00	3.1	2.1	1.3	0.4	0.2	0.3	0.5	0.5	0.7	1	1	1.1	1.4	1.8	2	2.1	2.1	2.5	2.6	3	3	3	3	3.1	3.6	3.5	3.5	3.6	3.8	3.7	3.9	4
XZ009	申扎县	2019-11-19 19:00:00	1.6	1.5	1	0.5	0.3	0.3	0.4	0.5	0.7	1	1	1.1	1.4	1.8	1.9	2.1	2.1	2.5	2.6	3	2.9	2.9	3	3.1	3.6	3.5	3.5	3.6	3.7	3.7	3.8	4
XZ009	申扎县	2019-11-19 20:00:00	-0.3	0.1	0.3	0.3	0.3	0.3	0.5	0.5	0.7	1	1	1.1	1.4	1.8	1.9	2.1	2.1	2.5	2.6	2.9	2.9	2.9	3	3	3.5	3.5	3.5	3.6	3.7	3.6	3.8	4
XZ009	申扎县	2019-11-19 21:00:00	-0.7	0	0	0.1	0.3	0.3	0.5	0.5	0.7	1	1	1.1	1.3	1.8	1.8	2.1	2.1	2.4	2.6	2.9	2.8	2.9	2.9	3	3.5	3.4	3.5	3.6	3.6	3.6	3.8	4
XZ009	申扎县	2019-11-19 22:00:00	-1.4	-0.2	0	0	0.3	0.3	0.5	0.5	0.7	0.9	0.9	1.1	1.3	1.7	1.8	2	2.1	2.4	2.6	2.9	2.8	2.9	2.9	3	3.5	3.4	3.4	3.5	3.6	3.6	3.8	4
XZ009	申扎县	2019-11-19 23:00:00	-2	-0.6	0	0	0.2	0.3	0.5	0.5	0.7	1	1	1.1	1.3	1.8	1.8	2	2.1	2.4	2.6	2.8	2.8	2.8	2.9	3	3.5	3.3	3.4	3.5	3.6	3.6	3.8	4
XZ009	申扎县	2019-11-20 00:00:00	-2.7	-1	0	0	0.3	0.3	0.5	0.5	0.7	1	1	1.1	1.3	1.8	1.8	2	2	2.4	2.6	2.8	2.8	2.8	2.8	3	3.5	3.3	3.4	3.5	3.6	3.6	3.8	4
XZ009	申扎县	2019-11-20 01:00:00	-3.2	-1.5	-0.4	0	0.2	0.4	0.5	0.5	0.7	1	1	1.1	1.3	1.8	1.8	2	2	2.3	2.5	2.8	2.8	2.8	2.8	3	3.5	3.3	3.3	3.5	3.6	3.6	3.8	4
XZ009	申扎县	2019-11-20 02:00:00	-3.8	-2	-0.7	0	0.2	0.4	0.5	0.5	0.7	1	1	1.1	1.3	1.8	1.8	2	2	2.3	2.5	2.8	2.8	2.8	2.8	3	3.5	3.3	3.3	3.5	3.6	3.6	3.8	4
XZ009	申扎县	2019-11-20 03:00:00	-4.2	-2.4	-1.1	-0.2	0.2	0.4	0.5	0.6	0.8	1	1	1.1	1.4	1.7	1.8	2	2	2.3	2.5	2.8	2.8	2.8	2.8	2.9	3.4	3.3	3.3	3.5	3.6	3.6	3.8	4
XZ009	申扎县	2019-11-20 04:00:00	-4.7	-2.9	-1.5	-0.5	0.1	0.4	0.5	0.6	0.8	1	1	1.1	1.4	1.7	1.8	2	2	2.3	2.5	2.8	2.8	2.8	2.8	2.9	3.4	3.3	3.3	3.5	3.6	3.5	3.7	3.9
XZ009	申扎县	2019-11-20 05:00:00	-5.2	-3.4	-2	-0.8	0	0.3	0.5	0.6	0.8	1	1	1.2	1.4	1.7	1.8	2	2	2.3	2.5	2.8	2.8	2.8	2.8	2.9	3.4	3.3	3.3	3.5	3.6	3.5	3.7	3.9
XZ009	申扎县	2019-11-20 06:00:00	-5.7	-3.9	-2.4	-1.2	-0.1	0.3	0.5	0.6	0.8	1	1	1.1	1.4	1.8	1.8	2	2	2.3	2.5	2.8	2.7	2.8	2.8	2.9	3.4	3.3	3.3	3.5	3.6	3.5	3.7	3.9
XZ009	申扎县	2019-11-20 07:00:00	-6	-4.3	-2.9	-1.5	-0.3	0.2	0.4	0.5	0.7	1	1	1.1	1.4	1.7	1.8	2	2	2.3	2.5	2.8	2.7	2.8	2.8	2.9	3.4	3.3	3.3	3.4	3.5	3.5	3.7	3.9
XZ009	申扎县	2019-11-20 08:00:00	-6.4	-4.7	-3.2	-1.9	-0.5	0	0.3	0.5	0.6	1	1	1.1	1.3	1.7	1.8	2	2	2.3	2.5	2.8	2.7	2.7	2.8	2.8	3.3	3.3	3.3	3.4	3.5	3.5	3.7	3.9
XZ009	申扎县	2019-11-20 09:00:00	-6.7	-5	-3.5	-2.2	-0.8	0	0.3	0.4	0.6	0.9	0.9	1.1	1.3	1.7	1.8	2	2	2.3	2.5	2.8	2.7	2.7	2.8	2.8	3.4	3.2	3.3	3.4	3.5	3.5	3.6	3.9
XZ009	申扎县	2019-11-20 10:00:00	-5.2	-4.7	-3.6	-2.4	-1	0	0.3	0.4	0.6	0.9	0.9	1.1	1.3	1.7	1.8	2	2	2.3	2.5	2.7	2.7	2.7	2.8	2.8	3.3	3.2	3.2	3.4	3.5	3.5	3.6	3.8
XZ009	申扎县	2019-11-20 11:00:00	-2.2	-2.9	-2.7	-2	-1	-0.1	0.1	0.3	0.6	0.8	0.8	1.1	1.3	1.7	1.8	1.9	2	2.3	2.5	2.7	2.7	2.7	2.7	2.8	3.3	3.2	3.3	3.4	3.5	3.5	3.6	3.9
XZ009	申扎县	2019-11-20 12:00:00	0	-1.2	-1.5	-1.4	-0.7	-0.1	0.1	0.3	0.5	0.8	0.8	1	1.2	1.6	1.7	1.9	2	2.3	2.5	2.7	2.6	2.7	2.7	2.8	3.3	3.2	3.3	3.4	3.5	3.5	3.6	3.8
XZ009	申扎县	2019-11-20 13:00:00	1.8	0	-0.7	-0.7	-0.4	0	0.1	0.3	0.5	0.8	0.8	1	1.2	1.6	1.7	1.9	2	2.3	2.5	2.7	2.6	2.7	2.7	2.8	3.3	3.2	3.2	3.4	3.5	3.5	3.6	3.8
XZ009	申扎县	2019-11-20 14:00:00	2.9	0.5	-0.2	-0.4	-0.1	0	0.1	0.2	0.5	0.7	0.7	1	1.1	1.6	1.7	1.9	1.9	2.2	2.4	2.7	2.6	2.7	2.7	2.8	3.3	3.2	3.2	3.3	3.5	3.4	3.6	3.8
XZ009	申扎县	2019-11-20 15:00:00	3.6	1.5	0.1	-0.1	0	0	0.1	0.2	0.5	0.7	0.7	1	1.1	1.6	1.6	1.8	1.9	2.2	2.4	2.6	2.6	2.6	2.7	2.8	3.3	3.1	3.2	3.3	3.5	3.5	3.6	3.8
XZ009	申扎县	2019-11-20 16:00:00	4.1	2.1	0.6	0	0	0.1	0.2	0.3	0.5	0.7	0.7	0.9	1.1	1.5	1.6	1.8	1.8	2.2	2.4	2.6	2.6	2.6	2.6	2.8	3.3	3.1	3.1	3.3	3.5	3.5	3.6	3.8
XZ009	申扎县	2019-11-20 17:00:00	4.2	2.7	1.2	0.1	0.1	0.1	0.2	0.3	0.5	0.7	0.7	0.9	1.1	1.5	1.6	1.8	1.8	2.1	2.3	2.6	2.6	2.6	2.6	2.8	3.3	3.1	3.1	3.3	3.5	3.4	3.6	3.8
XZ009	申扎县	2019-11-20 18:00:00	3.2	2.3	1.3	0.4	0.2	0.2	0.3	0.3	0.5	0.7	0.7	0.9	1.1	1.5	1.6	1.8	1.8	2.1	2.3	2.6	2.6	2.6	2.6	2.7	3.3	3.1	3.1	3.3	3.5	3.4	3.6	3.8
XZ009	申扎县	2019-11-20 19:00:00	1.9	1.6	1.1	0.5	0.3	0.2	0.3	0.3	0.5	0.7	0.7	0.9	1.1	1.5	1.6	1.8	1.8	2.1	2.3	2.6	2.6	2.6	2.6	2.7	3.2	3.1	3.1	3.3	3.4	3.4	3.6	3.8
XZ009	申扎县	2019-11-20 20:00:00	0.2	0.5	0.5	0.3	0.3	0.2	0.3	0.3	0.5	0.7	0.7	0.9	1.1	1.5	1.6	1.8	1.8	2.1	2.3	2.6	2.5	2.6	2.6	2.7	3.2	3.1	3.1	3.3	3.4	3.3	3.5	3.8
XZ009	申扎县	2019-11-20 21:00:00	-0.1	0	0	0	0.3	0.3	0.3	0.3	0.5	0.7	0.7	0.9	1.1	1.5	1.5	1.8	1.8	2.1	2.3	2.6	2.5	2.5	2.6	2.7	3.2	3.1	3.1	3.3	3.4	3.3	3.5	3.7
XZ009	申扎县	2019-11-20 22:00:00	-0.6	0	0	0.1	0.2	0.3	0.3	0.3	0.5	0.7	0.7	0.9	1.1	1.5	1.5	1.7	1.7	2.1	2.3	2.5	2.5	2.5	2.6	2.6	3.1	3	3.1	3.3	3.4	3.3	3.5	3.7
XZ009	申扎县	2019-11-20 23:00:00	-1.1	-0.1	0	0	0.3	0.3	0.3	0.3	0.5	0.7	0.7	0.9	1.1	1.5	1.5	1.7	1.7	2.1	2.3	2.5	2.5	2.5	2.5	2.6	3.1	3	3.1	3.3	3.3	3.3	3.5	3.7
XZ009	申扎县	2019-11-21 00:00:00	-1.5	-0.4	0	0	0.2	0.3	0.3	0.3	0.5	0.7	0.7	0.9	1.1	1.5	1.5	1.7	1.7	2	2.3	2.5	2.5	2.5	2.5	2.6	3.1	3	3.1	3.2	3.3	3.3	3.5	3.7
XZ009	申扎县	2019-11-21 01:00:00	-2	-0.7	0	0	0.2	0.3	0.3	0.3	0.5	0.7	0.7	0.9	1.1	1.4	1.5	1.7	1.7	2	2.2	2.5	2.5	2.5	2.5	2.6	3.1	3	3.1	3.2	3.3	3.3	3.5	3.7
XZ009	申扎县	2019-11-21 02:00:00	-2.6	-1.1	-0.2	0	0.2	0.3	0.3	0.3	0.5	0.7	0.7	0.9	1.1	1.5	1.5	1.7	1.7	2	2.2	2.5	2.5	2.5	2.5	2.6	3.1	3	3	3.2	3.3	3.3	3.5	3.7
XZ009	申扎县	2019-11-21 03:00:00	-2.9	-1.5	-0.5	0	0.2	0.3	0.3	0.3	0.5	0.7	0.7	0.9	1.1	1.5	1.5	1.7	1.7	2	2.2	2.5	2.5	2.5	2.5	2.6	3.1	3	3	3.1	3.3	3.3	3.5	3.7
XZ009	申扎县	2019-11-21 04:00:00	-3.2	-1.9	-0.8	0	0.2	0.3	0.3	0.4	0.5	0.7	0.7	0.9	1.1	1.5	1.5	1.7	1.7	2	2.2	2.5	2.5	2.5	2.5	2.6	3.1	3	3	3.1	3.3	3.3	3.4	3.6
XZ009	申扎县	2019-11-21 05:00:00	-3.8	-2.2	-1.1	-0.2	0.1	0.3	0.3	0.4	0.5	0.7	0.7	0.9	1.1	1.5	1.5	1.7	1.7	2	2.2	2.5	2.5	2.5	2.5	2.6	3.1	3	3	3.1	3.3	3.3	3.5	3.6
XZ009	申扎县	2019-11-21 06:00:00	-4.2	-2.7	-1.5	-0.5	0	0.3	0.3	0.4	0.5	0.8	0.8	0.9	1.1	1.5	1.5	1.7	1.7	2	2.2	2.5	2.5	2.5	2.5	2.6	3.1	3	3	3.1	3.3	3.3	3.4	3.6
XZ009	申扎县	2019-11-21 07:00:00	-3.9	-2.8	-1.8	-0.9	0	0.2	0.3	0.4	0.5	0.8	0.8	1	1.1	1.5	1.5	1.7	1.7	2	2.2	2.5	2.4	2.5	2.5	2.6	3.1	3	3	3.1	3.3	3.2	3.4	3.6
XZ009	申扎县	2019-11-21 08:00:00	-4.5	-3.2	-2	-1.1	-0.2	0.1	0.3	0.4	0.5	0.8	0.8	1	1.1	1.5	1.5	1.7	1.7	2	2.2	2.5	2.4	2.5	2.5	2.6	3.1	3	3	3.1	3.3	3.2	3.4	3.6
XZ009	申扎县	2019-11-21 09:00:00	-5.1	-3.6	-2.4	-1.4	-0.4	0	0.3	0.3	0.5	0.8	0.8	1	1.1	1.5	1.5	1.7	1.7	2	2.2	2.5	2.4	2.5	2.5	2.6	3.1	3	3	3.1	3.2	3.2	3.4	3.6
XZ009	申扎县	2019-11-21 10:00:00	-3.7	-3.4	-2.6	-1.6	-0.5	0	0.3	0.3	0.5	0.7	0.7	0.9	1.1	1.5	1.5	1.7	1.7	2	2.2	2.5	2.4	2.5	2.5	2.5	3.1	3	3	3.1	3.2	3.2	3.4	3.6
XZ009	申扎县	2019-11-21 11:00:00	-2.2	-2.3	-2	-1.4	-0.6	0	0.2	0.3	0.5	0.7	0.7	0.9	1.1	1.5	1.5	1.7	1.7	2	2.2	2.5	2.4	2.4	2.5	2.5	3.1	2.9	3	3.1	3.2	3.2	3.4	3.6
XZ009	申扎县	2019-11-21 12:00:00	-0.2	-1.1	-1.3	-1.1	-0.4	0	0.1	0.3	0.5	0.7	0.7	0.9	1.1	1.5	1.5	1.7	1.7	2	2.2	2.5	2.4	2.4	2.5	2.5	3	3	3	3.1	3.2	3.2	3.3	3.6
XZ009	申扎县	2019-11-21 13:00:00	0.9	-0.2	-0.7	-0.6	-0.2	0	0.1	0.2	0.5	0.6	0.6	0.8	1	1.5	1.5	1.7	1.7	2	2.1	2.5	2.4	2.4	2.5	2.5	3	2.9	3	3.1	3.2	3.1	3.3	3.6
XZ009	申扎县	2019-11-21 14:00:00	1.6	0	-0.2	-0.4	0	0	0.1	0.2	0.4	0.6	0.6	0.8	1	1.4	1.5	1.6	1.6	2	2.1	2.4	2.4	2.4	2.5	2.5	3	2.9	3	3.1	3.2	3.1	3.3	3.6
XZ009	申扎县	2019-11-21 15:00:00	2.7	0.6	0	-0.1	0	0	0.1	0.2	0.4	0.6	0.6	0.8	1	1.4	1.5	1.6	1.6	2	2.1	2.4	2.4	2.4	2.4	2.5	3	2.9	2.9	3.1	3.2	3.1	3.3	3.5
XZ009	申扎县	2019-11-21 16:00:00	3.5	1.5	0.2	0	0	0.1	0.2	0.2	0.4	0.6	0.6	0.8	1	1.4	1.5	1.6	1.6	2	2.1	2.4	2.3	2.4	2.4	2.5	3	2.9	2.9	3.1	3.1	3.1	3.3	3.5
XZ009	申扎县	2019-11-21 17:00:00	2.6	1.5	0.5	0	0.1	0.1	0.2	0.3	0.4	0.6	0.6	0.8	1	1.4	1.5	1.6	1.6	2	2.1	2.4	2.3	2.4	2.4	2.5	3	2.9	2.9	3.1	3.2	3.1	3.3	3.6
XZ009	申扎县	2019-11-21 18:00:00	2	1.2	0.5	0	0.1	0.2	0.3	0.2	0.4	0.6	0.6	0.8	1	1.4	1.5	1.6	1.6	1.9	2.1	2.4	2.3	2.3	2.4	2.5	3	2.8	2.9	3.1	3.1	3.1	3.3	3.5
XZ009	申扎县	2019-11-21 19:00:00	1	0.8	0.5	0.1	0.1	0.2	0.3	0.3	0.4	0.6	0.6	0.8	1	1.3	1.5	1.6	1.6	2	2.1	2.4	2.3	2.4	2.4	2.5	3	2.8	2.9	3	3.1	3.1	3.3	3.5
XZ009	申扎县	2019-11-21 20:00:00	-0.3	0	0	0	0.1	0.2	0.3	0.3	0.4	0.6	0.6	0.8	1	1.3	1.4	1.6	1.6	2	2.1	2.4	2.3	2.3	2.4	2.5	3	2.8	2.9	3	3.1	3.1	3.3	3.5
XZ009	申扎县	2019-11-21 21:00:00	-0.9	0	0	0	0.2	0.3	0.3	0.3	0.4	0.6	0.6	0.8	1	1.3	1.4	1.6	1.6	1.9	2.1	2.3	2.3	2.3	2.4	2.5	3	2.8	2.9	3	3.1	3.1	3.3	3.5
XZ009	申扎县	2019-11-21 22:00:00	-1.5	-0.3	0	0	0.2	0.2	0.3	0.3	0.5	0.6	0.6	0.8	1	1.3	1.4	1.6	1.6	1.9	2.1	2.3	2.3	2.3	2.3	2.5	3	2.8	2.9	3	3.1	3.1	3.3	3.5
XZ009	申扎县	2019-11-21 23:00:00	-1.9	-0.6	0	0	0.2	0.3	0.3	0.3	0.5	0.6	0.6	0.8	1	1.3	1.4	1.6	1.6	1.9	2.1	2.3	2.3	2.3	2.3	2.5	3	2.8	2.8	3	3.1	3.1	3.3	3.5
XZ009	申扎县	2019-11-22 00:00:00	-2.2	-0.9	-0.1	0	0.2	0.3	0.3	0.3	0.5	0.6	0.6	0.8	1	1.3	1.4	1.6	1.6	1.9	2.1	2.3	2.3	2.3	2.3	2.5	2.9	2.8	2.8	3	3.1	3.1	3.3	3.5
XZ009	申扎县	2019-11-22 01:00:00	-2.5	-1.2	-0.4	0	0.1	0.3	0.3	0.3	0.5	0.6	0.6	0.8	1	1.3	1.4	1.6	1.6	1.9	2.1	2.3	2.3	2.3	2.3	2.5	2.9	2.8	2.8	3	3.1	3.1	3.3	3.5
XZ009	申扎县	2019-11-22 02:00:00	-2.8	-1.6	-0.7	-0.1	0.1	0.3	0.3	0.3	0.5	0.6	0.6	0.8	1	1.3	1.4	1.6	1.6	1.9	2.1	2.3	2.3	2.3	2.3	2.4	2.9	2.8	2.8	3	3.1	3.1	3.2	3.5
XZ009	申扎县	2019-11-22 03:00:00	-2.9	-1.8	-0.9	-0.3	0	0.2	0.3	0.3	0.5	0.6	0.6	0.8	1	1.3	1.4	1.6	1.6	1.9	2	2.3	2.3	2.3	2.3	2.4	2.9	2.8	2.8	3	3.1	3.1	3.2	3.5
XZ009	申扎县	2019-11-22 04:00:00	-3.3	-2.1	-1.2	-0.5	0	0.2	0.3	0.3	0.5	0.7	0.7	0.8	1	1.3	1.4	1.6	1.6	1.9	2.1	2.3	2.3	2.3	2.3	2.4	2.9	2.8	2.8	3	3.1	3	3.2	3.5
XZ009	申扎县	2019-11-22 05:00:00	-3.7	-2.5	-1.5	-0.7	0	0.1	0.3	0.3	0.5	0.6	0.6	0.8	1	1.3	1.4	1.6	1.6	1.9	2.1	2.3	2.3	2.3	2.3	2.4	2.9	2.8	2.8	3	3.1	3	3.2	3.5
XZ009	申扎县	2019-11-22 06:00:00	-4.4	-2.9	-1.9	-1	-0.2	0.1	0.3	0.3	0.5	0.7	0.7	0.8	1	1.3	1.4	1.6	1.6	1.9	2	2.3	2.3	2.3	2.3	2.4	2.9	2.8	2.8	3	3.1	3	3.2	3.5
XZ009	申扎县	2019-11-22 07:00:00	-4.9	-3.4	-2.2	-1.3	-0.4	0	0.2	0.3	0.5	0.7	0.7	0.8	1	1.3	1.4	1.6	1.6	1.9	2	2.3	2.3	2.3	2.3	2.4	2.9	2.8	2.8	3	3	3	3.2	3.4
XZ009	申扎县	2019-11-22 08:00:00	-5.4	-3.9	-2.7	-1.6	-0.6	0	0.1	0.2	0.4	0.6	0.6	0.8	1	1.3	1.4	1.6	1.6	1.9	2	2.3	2.3	2.3	2.3	2.4	2.9	2.7	2.8	3	3	3	3.2	3.4
XZ009	申扎县	2019-11-22 09:00:00	-6	-4.4	-3.1	-1.9	-0.8	-0.1	0.1	0.2	0.4	0.6	0.6	0.8	1	1.3	1.4	1.6	1.6	1.9	2	2.3	2.3	2.3	2.3	2.4	2.9	2.8	2.8	3	3	3	3.1	3.4
XZ009	申扎县	2019-11-22 10:00:00	-4.4	-4	-3.2	-2.2	-1	-0.2	0	0.1	0.3	0.6	0.6	0.8	1	1.3	1.4	1.6	1.6	1.8	2	2.3	2.2	2.3	2.3	2.4	2.9	2.8	2.8	3	3	3	3.2	3.4
XZ009	申扎县	2019-11-22 11:00:00	-2.3	-2.7	-2.5	-1.9	-1	-0.4	0	0.1	0.3	0.6	0.6	0.8	1	1.3	1.4	1.5	1.5	1.9	2	2.3	2.3	2.3	2.3	2.3	2.9	2.8	2.8	2.9	3	3	3.1	3.4
XZ009	申扎县	2019-11-22 12:00:00	-0.2	-1.3	-1.6	-1.4	-0.9	-0.3	0	0.1	0.3	0.5	0.5	0.8	1	1.3	1.4	1.5	1.5	1.8	2	2.3	2.3	2.3	2.3	2.4	2.8	2.8	2.8	2.9	3	3	3.2	3.4
XZ009	申扎县	2019-11-22 13:00:00	0.8	-0.3	-0.8	-0.9	-0.5	-0.2	0	0.1	0.3	0.6	0.6	0.7	0.9	1.3	1.3	1.5	1.5	1.8	2	2.3	2.2	2.3	2.3	2.3	2.8	2.7	2.8	2.9	3	3	3.1	3.3
XZ009	申扎县	2019-11-22 14:00:00	2.1	0.1	-0.4	-0.5	-0.2	0	0	0.1	0.3	0.5	0.5	0.7	0.9	1.3	1.3	1.5	1.5	1.8	2	2.3	2.2	2.2	2.3	2.3	2.8	2.7	2.8	2.9	3	3	3.1	3.3
XZ009	申扎县	2019-11-22 15:00:00	3.1	0.9	0	-0.2	0	0	0	0.1	0.3	0.5	0.5	0.7	0.9	1.3	1.3	1.5	1.5	1.8	2	2.3	2.2	2.2	2.3	2.3	2.8	2.7	2.8	2.9	3	3	3.1	3.3
XZ009	申扎县	2019-11-22 16:00:00	4	1.8	0.3	0	0	0	0	0.1	0.3	0.5	0.5	0.7	0.9	1.2	1.3	1.5	1.5	1.8	2	2.2	2.2	2.2	2.3	2.3	2.8	2.7	2.8	2.9	3	3	3.1	3.3
XZ009	申扎县	2019-11-22 17:00:00	4.1	2.4	0.9	0	0	0	0.1	0.1	0.3	0.5	0.5	0.6	0.8	1.2	1.3	1.5	1.5	1.8	2	2.2	2.2	2.2	2.2	2.3	2.8	2.7	2.7	2.9	3	3	3.1	3.3
XZ009	申扎县	2019-11-22 18:00:00	3.6	2.3	1.2	0.2	0.1	0.1	0.1	0.1	0.3	0.5	0.5	0.6	0.8	1.2	1.3	1.5	1.5	1.8	2	2.2	2.2	2.1	2.2	2.3	2.8	2.7	2.7	2.8	3	3	3.1	3.3
XZ009	申扎县	2019-11-22 19:00:00	2.3	1.8	1.1	0.3	0.2	0.1	0.1	0.1	0.3	0.5	0.5	0.6	0.8	1.2	1.3	1.5	1.5	1.8	2	2.2	2.1	2.2	2.2	2.3	2.8	2.6	2.7	2.8	3	3	3.1	3.3
XZ009	申扎县	2019-11-22 20:00:00	0.5	0.6	0.5	0.3	0.2	0.2	0.1	0.1	0.3	0.5	0.5	0.6	0.9	1.2	1.3	1.5	1.4	1.8	1.9	2.2	2.1	2.1	2.2	2.3	2.8	2.6	2.7	2.8	3	2.9	3.1	3.3
XZ009	申扎县	2019-11-22 21:00:00	-0.3	0	0	0	0.2	0.2	0.2	0.1	0.3	0.5	0.5	0.7	0.8	1.2	1.3	1.5	1.5	1.7	1.9	2.2	2.1	2.1	2.2	2.3	2.8	2.6	2.7	2.8	3	3	3.1	3.3
XZ009	申扎县	2019-11-22 22:00:00	-0.9	0	0	0	0.2	0.2	0.2	0.1	0.3	0.5	0.5	0.6	0.9	1.2	1.2	1.5	1.4	1.7	1.9	2.1	2.1	2.1	2.2	2.3	2.8	2.6	2.6	2.8	3	2.9	3.1	3.3
XZ009	申扎县	2019-11-22 23:00:00	-1.2	-0.2	0	0	0.2	0.2	0.2	0.1	0.3	0.5	0.5	0.7	0.9	1.2	1.3	1.4	1.4	1.8	1.9	2.1	2.1	2.1	2.1	2.3	2.8	2.6	2.7	2.8	3	2.9	3.1	3.3
XZ009	申扎县	2019-11-23 00:00:00	-1.6	-0.5	0	0	0.2	0.2	0.2	0.1	0.3	0.5	0.5	0.7	0.8	1.2	1.3	1.4	1.4	1.7	1.9	2.1	2.1	2.1	2.1	2.3	2.8	2.6	2.6	2.8	2.9	2.9	3.1	3.3
XZ009	申扎县	2019-11-23 01:00:00	-1.9	-0.7	0	0	0.2	0.2	0.2	0.2	0.3	0.5	0.5	0.7	0.8	1.2	1.3	1.5	1.4	1.7	1.9	2.1	2.1	2.1	2.1	2.3	2.8	2.6	2.6	2.8	2.9	2.9	3.1	3.3
XZ009	申扎县	2019-11-23 02:00:00	-2.4	-1.1	-0.2	0	0.2	0.3	0.2	0.2	0.3	0.5	0.5	0.7	0.8	1.2	1.3	1.4	1.4	1.7	1.9	2.1	2.1	2.1	2.1	2.3	2.7	2.6	2.6	2.8	2.9	2.9	3.1	3.3
XZ009	申扎县	2019-11-23 03:00:00	-3	-1.5	-0.5	0	0.1	0.2	0.2	0.2	0.3	0.6	0.6	0.7	0.9	1.1	1.3	1.4	1.4	1.7	1.9	2.1	2.1	2.1	2.1	2.2	2.7	2.6	2.6	2.8	2.9	2.8	3	3.3
XZ009	申扎县	2019-11-23 04:00:00	-3.4	-1.9	-0.9	-0.1	0.1	0.2	0.2	0.2	0.3	0.6	0.6	0.7	0.9	1.2	1.3	1.5	1.4	1.7	1.9	2.1	2.1	2.1	2.1	2.2	2.7	2.6	2.6	2.8	2.9	2.8	3	3.3
XZ009	申扎县	2019-11-23 05:00:00	-3.7	-2.3	-1.2	-0.4	0	0.2	0.2	0.2	0.4	0.5	0.5	0.7	0.9	1.2	1.3	1.4	1.4	1.7	1.9	2.1	2.1	2.1	2.1	2.2	2.7	2.6	2.6	2.8	2.9	2.9	3	3.2
XZ009	申扎县	2019-11-23 06:00:00	-3.9	-2.6	-1.5	-0.7	0	0.1	0.2	0.2	0.4	0.6	0.6	0.7	0.9	1.3	1.3	1.4	1.4	1.7	1.9	2.1	2.1	2.1	2.1	2.2	2.7	2.6	2.6	2.8	2.9	2.8	3	3.3
XZ009	申扎县	2019-11-23 07:00:00	-3.7	-2.7	-1.8	-0.9	-0.2	0	0.2	0.2	0.4	0.6	0.6	0.7	0.9	1.2	1.3	1.5	1.5	1.7	1.9	2.1	2.1	2.1	2.1	2.2	2.7	2.6	2.6	2.8	2.9	2.8	3	3.2
XZ009	申扎县	2019-11-23 08:00:00	-3.7	-2.8	-1.9	-1.2	-0.4	0	0.1	0.2	0.4	0.6	0.6	0.7	0.9	1.2	1.3	1.5	1.5	1.8	1.9	2.1	2.1	2.1	2.1	2.2	2.7	2.6	2.6	2.8	2.9	2.8	3	3.2
XZ009	申扎县	2019-11-23 09:00:00	-3.5	-2.8	-2	-1.3	-0.5	0	0.1	0.2	0.3	0.6	0.6	0.8	0.9	1.2	1.3	1.5	1.5	1.7	1.9	2.1	2.1	2.1	2.1	2.2	2.7	2.6	2.6	2.8	2.9	2.8	3	3.2
XZ009	申扎县	2019-11-23 10:00:00	-2.5	-2.4	-2	-1.4	-0.6	0	0.1	0.1	0.3	0.6	0.6	0.7	0.9	1.2	1.3	1.5	1.4	1.7	1.9	2.1	2.1	2.1	2.1	2.2	2.7	2.6	2.6	2.8	2.8	2.8	3	3.2
XZ009	申扎县	2019-11-23 11:00:00	-0.7	-1.4	-1.4	-1.2	-0.5	-0.1	0	0.1	0.3	0.6	0.6	0.7	0.9	1.2	1.3	1.5	1.5	1.7	1.9	2.1	2.1	2.1	2.1	2.2	2.7	2.6	2.6	2.7	2.8	2.8	3	3.2
XZ009	申扎县	2019-11-23 12:00:00	0.6	-0.4	-0.8	-0.7	-0.4	0	0	0.1	0.3	0.5	0.5	0.7	0.9	1.2	1.3	1.5	1.4	1.7	1.9	2.1	2.1	2.1	2.1	2.2	2.7	2.6	2.6	2.8	2.8	2.8	3	3.2
XZ009	申扎县	2019-11-23 13:00:00	1.8	0	-0.3	-0.4	-0.2	0	0	0.1	0.3	0.5	0.5	0.7	0.8	1.2	1.3	1.5	1.4	1.8	1.9	2.1	2.1	2.1	2.1	2.2	2.7	2.5	2.6	2.8	2.8	2.8	3	3.2
XZ009	申扎县	2019-11-23 14:00:00	3	0.8	0	-0.2	0	0	0.1	0.1	0.3	0.5	0.5	0.7	0.8	1.2	1.2	1.4	1.4	1.7	1.9	2.1	2.1	2.1	2.1	2.2	2.7	2.6	2.6	2.7	2.8	2.8	3	3.1
XZ009	申扎县	2019-11-23 15:00:00	4.6	2	0.3	0	0	0	0.1	0.1	0.3	0.5	0.5	0.6	0.8	1.2	1.2	1.4	1.4	1.7	1.9	2.1	2.1	2.1	2.1	2.2	2.7	2.6	2.6	2.8	2.8	2.8	3	3.2
XZ009	申扎县	2019-11-23 16:00:00	5.5	3.1	1.2	0.1	0.1	0.1	0.1	0.1	0.3	0.5	0.5	0.6	0.8	1.1	1.2	1.4	1.4	1.7	1.8	2.1	2.1	2.1	2.1	2.2	2.7	2.6	2.6	2.7	2.8	2.8	3	3.1
XZ009	申扎县	2019-11-23 17:00:00	5	3.5	2	0.6	0.2	0.1	0.1	0.1	0.3	0.5	0.5	0.6	0.8	1.1	1.2	1.4	1.4	1.7	1.8	2.1	2.1	2.1	2.1	2.2	2.7	2.6	2.6	2.7	2.8	2.8	3	3.1
XZ009	申扎县	2019-11-23 18:00:00	3.5	2.8	1.9	0.9	0.3	0.2	0.2	0.2	0.3	0.5	0.5	0.7	0.8	1.1	1.2	1.4	1.4	1.7	1.8	2.1	2.1	2.1	2.1	2.2	2.6	2.5	2.6	2.7	2.8	2.8	3	3.1
XZ009	申扎县	2019-11-23 19:00:00	2.5	2.1	1.5	0.8	0.4	0.2	0.2	0.2	0.3	0.5	0.5	0.7	0.8	1.1	1.2	1.4	1.3	1.6	1.8	2.1	2.1	2.1	2.1	2.2	2.6	2.6	2.6	2.7	2.8	2.8	3	3.1
XZ009	申扎县	2019-11-23 20:00:00	1.5	1.3	1	0.6	0.4	0.3	0.2	0.2	0.3	0.5	0.5	0.7	0.8	1.1	1.2	1.4	1.4	1.6	1.8	2.1	2	2.1	2.1	2.1	2.6	2.5	2.6	2.7	2.8	2.8	3	3.1
XZ009	申扎县	2019-11-23 21:00:00	0.9	0.8	0.6	0.5	0.4	0.3	0.2	0.2	0.3	0.5	0.5	0.6	0.8	1.1	1.2	1.4	1.4	1.6	1.8	2.1	2	2	2.1	2.1	2.6	2.5	2.5	2.7	2.8	2.8	3	3.1
XZ009	申扎县	2019-11-23 22:00:00	0.3	0.3	0.3	0.3	0.3	0.3	0.2	0.2	0.3	0.5	0.5	0.6	0.8	1.1	1.2	1.4	1.3	1.6	1.8	2.1	2	2	2.1	2.1	2.6	2.5	2.5	2.7	2.8	2.8	2.9	3.1
XZ009	申扎县	2019-11-23 23:00:00	-0.3	0	0	0.1	0.3	0.3	0.2	0.2	0.3	0.5	0.5	0.7	0.8	1.1	1.2	1.4	1.3	1.6	1.8	2.1	2	2	2.1	2.1	2.6	2.5	2.5	2.7	2.8	2.8	3	3.1
XZ009	申扎县	2019-11-24 00:00:00	-0.2	-0.2	0	0	0.2	0.3	0.2	0.2	0.3	0.5	0.5	0.7	0.8	1.2	1.2	1.4	1.3	1.6	1.8	2.1	2	2	2	2.1	2.6	2.5	2.5	2.7	2.8	2.8	3	3.1
XZ009	申扎县	2019-11-24 01:00:00	0.1	0.1	0.1	0.1	0.3	0.3	0.3	0.2	0.4	0.6	0.6	0.7	0.9	1.1	1.2	1.4	1.3	1.6	1.8	2.1	2	2	2	2.1	2.6	2.5	2.5	2.6	2.8	2.8	2.9	3.1
XZ009	申扎县	2019-11-24 02:00:00	0	0.1	0.1	0.1	0.3	0.3	0.2	0.2	0.4	0.6	0.6	0.7	0.9	1.2	1.2	1.4	1.3	1.7	1.8	2.1	2	2	2	2.1	2.6	2.5	2.5	2.6	2.8	2.8	3	3.1
XZ009	申扎县	2019-11-24 03:00:00	0	0	0.1	0.1	0.3	0.3	0.3	0.3	0.4	0.6	0.6	0.8	0.9	1.2	1.3	1.4	1.4	1.7	1.8	2.1	2	2	2.1	2.1	2.6	2.5	2.5	2.6	2.8	2.7	2.9	3.1
XZ009	申扎县	2019-11-24 04:00:00	-0.3	0	0.1	0.1	0.3	0.3	0.3	0.3	0.4	0.6	0.6	0.8	0.9	1.2	1.3	1.4	1.4	1.7	1.8	2.1	2	2	2.1	2.1	2.6	2.5	2.5	2.6	2.8	2.8	2.9	3.1
XZ009	申扎县	2019-11-24 05:00:00	-0.7	0	0	0.1	0.3	0.3	0.3	0.3	0.4	0.6	0.6	0.8	1	1.3	1.3	1.4	1.4	1.7	1.9	2.1	2	2	2.1	2.1	2.6	2.5	2.5	2.6	2.8	2.7	2.9	3.1
XZ009	申扎县	2019-11-24 06:00:00	-1	-0.2	0	0	0.3	0.3	0.3	0.3	0.5	0.6	0.6	0.8	1	1.3	1.3	1.5	1.4	1.7	1.9	2.1	2	2	2.1	2.1	2.6	2.5	2.5	2.6	2.8	2.7	2.9	3.1
XZ009	申扎县	2019-11-24 07:00:00	-1.2	-0.4	0	0	0.2	0.3	0.3	0.3	0.5	0.6	0.6	0.8	1	1.3	1.3	1.5	1.5	1.7	1.9	2.1	2.1	2.1	2.1	2.1	2.6	2.5	2.5	2.6	2.8	2.7	2.9	3.1
XZ009	申扎县	2019-11-24 08:00:00	-1.5	-0.7	0	0	0.2	0.3	0.3	0.3	0.5	0.6	0.6	0.8	1	1.3	1.3	1.5	1.4	1.8	1.9	2.1	2.1	2.1	2.1	2.1	2.6	2.5	2.5	2.6	2.8	2.7	2.9	3.1
XZ009	申扎县	2019-11-24 09:00:00	-2.2	-1	-0.2	0	0.2	0.3	0.3	0.3	0.5	0.6	0.6	0.8	1	1.3	1.3	1.5	1.5	1.8	1.9	2.1	2.1	2.1	2.1	2.1	2.6	2.5	2.5	2.6	2.8	2.7	2.9	3.1
XZ009	申扎县	2019-11-24 10:00:00	-1.5	-1	-0.4	0	0.2	0.3	0.3	0.3	0.5	0.7	0.7	0.8	1	1.3	1.3	1.5	1.5	1.8	1.9	2.1	2.1	2.1	2.1	2.1	2.6	2.5	2.5	2.6	2.8	2.8	2.9	3.1
XZ009	申扎县	2019-11-24 11:00:00	0	-0.4	-0.2	0	0.2	0.3	0.3	0.3	0.5	0.7	0.7	0.8	1	1.3	1.3	1.5	1.5	1.8	1.9	2.1	2.1	2.1	2.1	2.1	2.6	2.5	2.5	2.6	2.8	2.7	2.9	3.1
XZ009	申扎县	2019-11-24 12:00:00	1	0	0	0	0.2	0.3	0.3	0.3	0.5	0.7	0.7	0.8	1	1.3	1.3	1.5	1.5	1.8	1.9	2.1	2.1	2.1	2.1	2.1	2.6	2.5	2.5	2.6	2.7	2.7	2.9	3.1
XZ009	申扎县	2019-11-24 13:00:00	2.1	0.5	0	0	0.2	0.3	0.3	0.3	0.5	0.7	0.7	0.9	1	1.3	1.3	1.5	1.5	1.8	1.9	2.1	2.1	2.1	2.1	2.2	2.6	2.5	2.5	2.6	2.8	2.7	2.9	3.1
XZ009	申扎县	2019-11-24 14:00:00	3.6	1.6	0.3	0.1	0.3	0.3	0.3	0.4	0.5	0.7	0.7	0.9	1	1.3	1.4	1.5	1.5	1.8	2	2.1	2.1	2.1	2.1	2.2	2.6	2.5	2.5	2.6	2.8	2.7	2.9	3.1
XZ009	申扎县	2019-11-24 15:00:00	4.9	2.8	1.2	0.2	0.3	0.3	0.4	0.4	0.5	0.7	0.7	0.9	1	1.3	1.4	1.5	1.5	1.8	1.9	2.1	2.1	2.1	2.1	2.2	2.6	2.5	2.5	2.6	2.8	2.7	2.9	3.1
XZ009	申扎县	2019-11-24 16:00:00	5.8	4	2.5	1.1	0.5	0.3	0.4	0.4	0.5	0.8	0.8	0.9	1	1.3	1.3	1.5	1.5	1.8	2	2.1	2.1	2.1	2.1	2.2	2.6	2.5	2.5	2.6	2.8	2.7	2.9	3.1
XZ009	申扎县	2019-11-24 17:00:00	5.8	4.5	3.2	2	1	0.4	0.4	0.4	0.5	0.7	0.7	0.9	1	1.3	1.4	1.5	1.5	1.8	2	2.1	2.1	2.1	2.1	2.2	2.6	2.5	2.5	2.6	2.8	2.7	2.9	3.1
XZ009	申扎县	2019-11-24 18:00:00	5.3	4.4	3.4	2.3	1.6	0.9	0.6	0.5	0.6	0.8	0.8	0.9	1	1.3	1.4	1.5	1.5	1.8	2	2.1	2.1	2.1	2.1	2.2	2.6	2.5	2.5	2.6	2.8	2.8	2.9	3.1
XZ009	申扎县	2019-11-24 19:00:00	3.7	3.6	3.2	2.6	2.1	1.7	1.3	1	0.9	1	1	1	1.1	1.3	1.4	1.5	1.5	1.8	2	2.1	2.1	2.1	2.1	2.2	2.7	2.5	2.5	2.6	2.8	2.8	2.9	3.1
XZ009	申扎县	2019-11-24 20:00:00	1.6	2.3	2.5	2.3	2.3	2	1.6	1.4	1.3	1.3	1.3	1.2	1.3	1.5	1.4	1.6	1.5	1.8	2	2.1	2.1	2.1	2.1	2.2	2.7	2.5	2.5	2.7	2.8	2.7	2.9	3.1
XZ009	申扎县	2019-11-24 21:00:00	0	0.8	1.4	1.7	2	2	1.8	1.6	1.5	1.5	1.5	1.5	1.5	1.5	1.5	1.6	1.6	1.8	2	2.2	2.1	2.1	2.1	2.2	2.6	2.5	2.5	2.6	2.8	2.8	2.9	3.1
XZ009	申扎县	2019-11-24 22:00:00	-0.4	0.3	0.8	1.1	1.6	1.7	1.7	1.6	1.6	1.6	1.6	1.6	1.6	1.6	1.6	1.7	1.6	1.9	2	2.3	2.1	2.1	2.1	2.2	2.7	2.5	2.5	2.6	2.8	2.7	2.9	3.1
XZ009	申扎县	2019-11-24 23:00:00	-0.9	0	0.5	0.8	1.3	1.5	1.6	1.5	1.6	1.6	1.6	1.6	1.7	1.8	1.7	1.8	1.7	2	2	2.3	2.1	2.1	2.1	2.2	2.7	2.5	2.5	2.6	2.8	2.7	2.9	3.1
XZ009	申扎县	2019-11-25 00:00:00	-1.4	-0.1	0.3	0.6	1.1	1.3	1.5	1.5	1.5	1.6	1.6	1.6	1.7	1.8	1.8	1.8	1.8	2	2.1	2.3	2.2	2.1	2.1	2.2	2.7	2.5	2.5	2.6	2.8	2.7	2.9	3.1
XZ009	申扎县	2019-11-25 01:00:00	-1.6	-0.4	0.1	0.5	1	1.2	1.3	1.4	1.4	1.6	1.6	1.6	1.7	1.8	1.8	1.9	1.8	2.1	2.1	2.3	2.2	2.2	2.2	2.3	2.7	2.5	2.6	2.6	2.8	2.7	2.9	3.1
XZ009	申扎县	2019-11-25 02:00:00	-1.8	-0.6	0	0.4	0.8	1.1	1.3	1.3	1.4	1.6	1.6	1.6	1.7	1.8	1.8	2	1.8	2.1	2.1	2.4	2.3	2.2	2.2	2.3	2.7	2.6	2.6	2.7	2.8	2.7	2.9	3.1
XZ009	申扎县	2019-11-25 03:00:00	-2.2	-0.9	0	0.3	0.7	1	1.1	1.2	1.3	1.5	1.5	1.6	1.8	1.9	1.8	2	1.8	2.1	2.2	2.4	2.3	2.3	2.2	2.3	2.8	2.6	2.6	2.7	2.8	2.7	2.9	3.1
XZ009	申扎县	2019-11-25 04:00:00	-2.1	-1	-0.2	0.1	0.6	0.9	1.1	1.1	1.3	1.5	1.5	1.6	1.6	1.9	1.9	2	1.9	2.1	2.3	2.5	2.3	2.3	2.3	2.3	2.8	2.6	2.6	2.7	2.8	2.8	2.9	3.1
XZ009	申扎县	2019-11-25 05:00:00	-2.4	-1.2	-0.4	0.1	0.6	0.8	1	1	1.2	1.4	1.4	1.5	1.6	1.8	1.8	2	1.9	2.1	2.3	2.5	2.3	2.3	2.3	2.3	2.8	2.6	2.6	2.7	2.8	2.8	2.9	3.1
XZ009	申扎县	2019-11-25 06:00:00	-2	-1.2	-0.5	0	0.5	0.8	0.9	1	1.1	1.3	1.3	1.5	1.6	1.8	1.8	2	1.9	2.1	2.3	2.5	2.4	2.3	2.3	2.3	2.8	2.6	2.6	2.8	2.8	2.8	2.9	3.1
XZ009	申扎县	2019-11-25 07:00:00	-2	-1.2	-0.5	0	0.4	0.7	0.8	0.9	1.1	1.3	1.3	1.5	1.6	1.8	1.8	2	1.9	2.1	2.3	2.5	2.4	2.3	2.3	2.4	2.8	2.6	2.6	2.8	2.8	2.8	3	3.1
XZ009	申扎县	2019-11-25 08:00:00	-2.7	-1.5	-0.7	0	0.3	0.6	0.8	0.8	1	1.2	1.2	1.4	1.6	1.8	1.8	2	1.9	2.1	2.3	2.5	2.4	2.4	2.3	2.4	2.8	2.6	2.6	2.8	2.8	2.8	3	3.1
XZ009	申扎县	2019-11-25 09:00:00	-3.4	-2	-0.9	-0.2	0.3	0.6	0.7	0.8	1	1.2	1.2	1.3	1.5	1.8	1.8	2	1.9	2.1	2.3	2.5	2.4	2.3	2.3	2.4	2.8	2.7	2.6	2.8	2.8	2.8	3	3.1
XZ009	申扎县	2019-11-25 10:00:00	-2.1	-1.8	-1.1	-0.3	0.2	0.5	0.6	0.7	0.9	1.1	1.1	1.3	1.5	1.8	1.8	1.9	1.9	2.1	2.3	2.5	2.4	2.3	2.3	2.4	2.9	2.7	2.6	2.8	2.8	2.8	3	3.1
XZ009	申扎县	2019-11-25 11:00:00	-0.2	-0.8	-0.7	-0.2	0.1	0.5	0.6	0.7	0.8	1.1	1.1	1.3	1.4	1.7	1.8	1.9	1.8	2.1	2.3	2.5	2.4	2.3	2.3	2.4	2.8	2.6	2.6	2.8	2.9	2.8	3	3.1
XZ009	申扎县	2019-11-25 12:00:00	0.8	-0.1	-0.2	-0.1	0.2	0.5	0.6	0.6	0.8	1	1	1.2	1.4	1.7	1.7	1.9	1.8	2.1	2.3	2.5	2.4	2.3	2.3	2.4	2.8	2.7	2.7	2.8	2.9	2.8	3	3.1
XZ009	申扎县	2019-11-25 13:00:00	2	0.3	0	0	0.2	0.5	0.6	0.6	0.8	1	1	1.2	1.3	1.6	1.7	1.8	1.8	2.1	2.3	2.5	2.4	2.3	2.3	2.4	2.8	2.6	2.7	2.8	2.9	2.8	3	3.1
XZ009	申扎县	2019-11-25 14:00:00	3	1	0.1	0	0.3	0.5	0.6	0.6	0.8	1	1	1.1	1.3	1.6	1.7	1.8	1.8	2.1	2.2	2.5	2.4	2.3	2.3	2.4	2.8	2.7	2.7	2.8	2.9	2.8	3	3.1
XZ009	申扎县	2019-11-25 15:00:00	3.5	1.8	0.5	0.1	0.3	0.5	0.6	0.6	0.8	1	1	1.1	1.3	1.6	1.6	1.8	1.8	2	2.2	2.5	2.3	2.3	2.3	2.4	2.8	2.7	2.7	2.8	2.9	2.8	3	3.1
XZ009	申扎县	2019-11-25 16:00:00	3	2	1	0.2	0.3	0.5	0.6	0.6	0.8	1	1	1.1	1.3	1.6	1.6	1.8	1.8	2	2.2	2.4	2.3	2.3	2.3	2.4	2.8	2.7	2.7	2.8	2.9	2.8	3	3.2
XZ009	申扎县	2019-11-25 17:00:00	2.7	2	1.2	0.5	0.3	0.5	0.6	0.6	0.7	1	1	1.1	1.3	1.6	1.6	1.8	1.7	2	2.1	2.4	2.3	2.3	2.3	2.4	2.8	2.6	2.7	2.8	2.9	2.8	3	3.2
XZ009	申扎县	2019-11-25 18:00:00	2	1.6	1.1	0.7	0.6	0.6	0.6	0.6	0.8	1	1	1.1	1.3	1.5	1.6	1.8	1.7	2	2.1	2.4	2.3	2.3	2.3	2.4	2.8	2.6	2.7	2.8	2.9	2.8	3	3.1
XZ009	申扎县	2019-11-25 19:00:00	1.1	1.1	1.1	0.9	0.9	0.8	0.8	0.7	0.8	1	1	1.1	1.3	1.5	1.6	1.8	1.7	2	2.1	2.4	2.3	2.3	2.3	2.3	2.8	2.7	2.7	2.8	2.9	2.8	3	3.1
XZ009	申扎县	2019-11-25 20:00:00	-0.4	0.1	0.6	0.7	1	1	0.9	0.8	0.9	1	1	1.1	1.3	1.5	1.6	1.8	1.7	2	2.1	2.4	2.3	2.3	2.3	2.3	2.8	2.6	2.6	2.8	2.9	2.8	3	3.1
XZ009	申扎县	2019-11-25 21:00:00	-0.5	0	0	0.2	0.6	0.8	0.9	0.8	1	1.1	1.1	1.2	1.3	1.6	1.6	1.8	1.7	2	2.1	2.4	2.3	2.3	2.3	2.3	2.8	2.6	2.6	2.8	2.9	2.8	3	3.1
XZ009	申扎县	2019-11-25 22:00:00	-1	0	0.1	0.3	0.6	0.8	0.9	0.9	1	1.1	1.1	1.3	1.3	1.6	1.6	1.8	1.7	2	2.1	2.4	2.3	2.3	2.3	2.3	2.8	2.6	2.6	2.8	2.9	2.8	3	3.1
XZ009	申扎县	2019-11-25 23:00:00	-1.5	-0.3	0	0.3	0.6	0.8	0.9	0.8	1	1.1	1.1	1.3	1.4	1.6	1.6	1.8	1.8	2	2.1	2.4	2.3	2.3	2.3	2.3	2.8	2.6	2.6	2.8	2.9	2.8	3	3.1
XZ009	申扎县	2019-11-26 00:00:00	-2	-0.7	0	0.2	0.6	0.8	0.9	0.9	1	1.1	1.1	1.3	1.4	1.6	1.6	1.8	1.7	2	2.1	2.4	2.3	2.3	2.3	2.3	2.8	2.6	2.6	2.8	2.9	2.8	3	3.1
XZ009	申扎县	2019-11-26 01:00:00	-2.2	-0.9	0	0.1	0.5	0.7	0.8	0.8	1	1.1	1.1	1.3	1.4	1.6	1.6	1.8	1.7	2	2.1	2.4	2.3	2.3	2.3	2.3	2.8	2.6	2.6	2.8	2.9	2.8	3	3.1
XZ009	申扎县	2019-11-26 02:00:00	-2.6	-1.2	-0.2	0.1	0.5	0.7	0.8	0.8	0.9	1.1	1.1	1.3	1.4	1.6	1.6	1.8	1.7	2	2.1	2.4	2.3	2.3	2.3	2.3	2.8	2.6	2.6	2.8	2.8	2.8	3	3.1
XZ009	申扎县	2019-11-26 03:00:00	-3.3	-1.7	-0.5	0	0.4	0.6	0.8	0.8	1	1.1	1.1	1.3	1.4	1.6	1.6	1.8	1.8	2	2.1	2.4	2.3	2.3	2.3	2.3	2.8	2.6	2.6	2.8	2.8	2.8	3	3.1
XZ009	申扎县	2019-11-26 04:00:00	-3.7	-2	-0.9	0	0.4	0.6	0.7	0.8	0.9	1.1	1.1	1.2	1.4	1.6	1.6	1.8	1.8	2	2.1	2.4	2.3	2.3	2.3	2.3	2.8	2.6	2.6	2.8	2.8	2.8	3	3.1
XZ009	申扎县	2019-11-26 05:00:00	-4.1	-2.5	-1.2	-0.2	0.3	0.5	0.6	0.7	0.8	1.1	1.1	1.2	1.4	1.6	1.6	1.8	1.8	2	2.2	2.4	2.3	2.3	2.3	2.3	2.8	2.6	2.6	2.8	2.9	2.8	3	3.1
XZ009	申扎县	2019-11-26 06:00:00	-4	-2.7	-1.5	-0.4	0.2	0.5	0.6	0.6	0.8	1	1	1.2	1.3	1.6	1.6	1.8	1.8	2	2.1	2.4	2.3	2.3	2.3	2.3	2.8	2.6	2.6	2.8	2.9	2.8	3	3.1
XZ009	申扎县	2019-11-26 07:00:00	-4.2	-2.9	-1.7	-0.7	0.1	0.4	0.6	0.6	0.8	1	1	1.2	1.3	1.6	1.6	1.8	1.8	2	2.1	2.4	2.3	2.3	2.3	2.3	2.8	2.6	2.6	2.8	2.8	2.8	3	3.1
XZ009	申扎县	2019-11-26 08:00:00	-4.3	-3	-1.9	-0.9	0	0.3	0.5	0.6	0.8	1	1	1.1	1.3	1.6	1.6	1.8	1.7	2	2.1	2.4	2.3	2.3	2.3	2.3	2.8	2.6	2.6	2.8	2.9	2.8	3	3.1
XZ009	申扎县	2019-11-26 09:00:00	-4.5	-3.2	-2.1	-1.1	0	0.3	0.5	0.5	0.7	1	1	1.1	1.3	1.6	1.6	1.8	1.7	2	2.1	2.4	2.3	2.3	2.3	2.3	2.8	2.6	2.6	2.8	2.8	2.8	3	3.1
XZ009	申扎县	2019-11-26 10:00:00	-3.7	-3.1	-2.2	-1.2	-0.2	0.2	0.4	0.5	0.7	0.9	0.9	1.1	1.3	1.6	1.6	1.8	1.7	2	2.1	2.3	2.3	2.3	2.3	2.3	2.8	2.6	2.6	2.8	2.8	2.8	3	3.1
XZ009	申扎县	2019-11-26 11:00:00	-1.7	-2	-1.8	-1.2	-0.3	0.1	0.4	0.5	0.6	0.9	0.9	1	1.2	1.5	1.6	1.8	1.7	2	2.1	2.3	2.3	2.3	2.3	2.3	2.8	2.6	2.6	2.8	2.8	2.8	3	3.1
XZ009	申扎县	2019-11-26 12:00:00	0	-0.9	-1	-0.8	-0.2	0.1	0.3	0.4	0.6	0.8	0.8	1	1.2	1.5	1.5	1.7	1.7	2	2.1	2.3	2.3	2.3	2.3	2.3	2.8	2.6	2.6	2.8	2.8	2.8	3	3.1
XZ009	申扎县	2019-11-26 13:00:00	0.8	-0.2	-0.5	-0.4	0	0.1	0.3	0.4	0.6	0.8	0.8	1	1.1	1.5	1.5	1.7	1.6	2	2.1	2.3	2.3	2.3	2.3	2.3	2.8	2.6	2.6	2.8	2.8	2.8	3	3.1
XZ009	申扎县	2019-11-26 14:00:00	1.9	0.1	-0.2	-0.2	0	0.2	0.3	0.3	0.5	0.8	0.8	1	1.1	1.5	1.5	1.6	1.6	1.9	2.1	2.3	2.3	2.3	2.3	2.3	2.8	2.6	2.6	2.8	2.8	2.8	3	3.1
XZ009	申扎县	2019-11-26 15:00:00	2.1	0.7	0	0	0	0.2	0.3	0.4	0.5	0.8	0.8	0.9	1.1	1.4	1.5	1.6	1.6	1.9	2.1	2.3	2.3	2.3	2.3	2.3	2.8	2.6	2.6	2.8	2.8	2.8	3	3.1
XZ009	申扎县	2019-11-26 16:00:00	1.2	0.6	0.1	0	0.1	0.3	0.3	0.4	0.5	0.7	0.7	0.9	1.1	1.4	1.5	1.6	1.6	1.9	2	2.3	2.2	2.2	2.2	2.3	2.8	2.6	2.6	2.8	2.8	2.8	3	3.1
XZ009	申扎县	2019-11-26 17:00:00	0.5	0.3	0.1	0	0.1	0.3	0.3	0.3	0.5	0.7	0.7	0.9	1.1	1.4	1.5	1.6	1.6	1.9	2	2.3	2.2	2.2	2.2	2.3	2.8	2.6	2.6	2.8	2.8	2.8	3	3.1
XZ009	申扎县	2019-11-26 18:00:00	0.3	0.2	0.1	0	0.1	0.3	0.4	0.3	0.5	0.7	0.7	0.9	1	1.4	1.4	1.6	1.5	1.8	2	2.3	2.2	2.2	2.2	2.3	2.8	2.6	2.6	2.8	2.8	2.8	3	3.1
XZ009	申扎县	2019-11-26 19:00:00	0	0	0	0	0.2	0.3	0.3	0.4	0.5	0.7	0.7	0.9	1	1.3	1.4	1.5	1.5	1.8	2	2.3	2.2	2.2	2.2	2.3	2.7	2.6	2.6	2.7	2.8	2.8	3	3.1
XZ009	申扎县	2019-11-26 20:00:00	-0.4	0	0	0	0.2	0.3	0.4	0.3	0.5	0.7	0.7	0.8	1	1.3	1.4	1.6	1.5	1.8	2	2.2	2.1	2.1	2.1	2.3	2.7	2.6	2.6	2.7	2.8	2.8	2.9	3.1
XZ009	申扎县	2019-11-26 21:00:00	-1	0	0	0	0.2	0.3	0.4	0.4	0.5	0.7	0.7	0.8	1	1.3	1.4	1.5	1.5	1.8	2	2.2	2.1	2.1	2.1	2.2	2.7	2.6	2.6	2.7	2.8	2.8	2.9	3.1
XZ009	申扎县	2019-11-26 22:00:00	-1.5	-0.4	0	0	0.2	0.3	0.3	0.3	0.5	0.7	0.7	0.8	1	1.3	1.4	1.5	1.5	1.8	2	2.2	2.1	2.1	2.1	2.2	2.7	2.6	2.6	2.7	2.8	2.8	2.9	3.1
XZ009	申扎县	2019-11-26 23:00:00	-2	-0.8	-0.2	0	0.2	0.3	0.3	0.3	0.5	0.7	0.7	0.8	1	1.3	1.3	1.5	1.5	1.8	2	2.2	2.1	2.1	2.1	2.2	2.7	2.5	2.6	2.7	2.8	2.8	2.9	3.1
XZ009	申扎县	2019-11-27 00:00:00	-2.3	-1.2	-0.4	0	0.1	0.3	0.3	0.4	0.5	0.7	0.7	0.8	1	1.3	1.3	1.5	1.5	1.8	2	2.2	2.1	2.1	2.1	2.2	2.7	2.5	2.6	2.7	2.8	2.8	2.9	3.1
XZ009	申扎县	2019-11-27 01:00:00	-2.9	-1.5	-0.7	-0.2	0.1	0.3	0.4	0.3	0.5	0.7	0.7	0.8	1	1.3	1.3	1.5	1.5	1.8	2	2.1	2.1	2.1	2.1	2.2	2.7	2.5	2.6	2.6	2.8	2.8	2.9	3.1
XZ009	申扎县	2019-11-27 02:00:00	-3.5	-2	-1	-0.4	0	0.3	0.4	0.3	0.5	0.7	0.7	0.8	1	1.3	1.3	1.5	1.5	1.8	1.9	2.1	2.1	2.1	2.1	2.2	2.6	2.5	2.5	2.7	2.8	2.7	2.9	3.1
XZ009	申扎县	2019-11-27 03:00:00	-3.7	-2.4	-1.4	-0.7	0	0.3	0.3	0.4	0.5	0.7	0.7	0.8	1	1.3	1.3	1.5	1.5	1.8	1.9	2.1	2.1	2.1	2.1	2.2	2.6	2.5	2.5	2.6	2.8	2.7	2.9	3.1
XZ009	申扎县	2019-11-27 04:00:00	-4.1	-2.8	-1.7	-0.9	-0.1	0.1	0.3	0.3	0.5	0.6	0.6	0.8	1	1.3	1.3	1.5	1.5	1.8	1.9	2.1	2.1	2.1	2.1	2.1	2.6	2.5	2.5	2.6	2.8	2.7	2.8	3.1
XZ009	申扎县	2019-11-27 05:00:00	-4.5	-3.1	-2	-1.2	-0.3	0.1	0.3	0.3	0.5	0.6	0.6	0.8	1	1.3	1.3	1.5	1.5	1.8	1.9	2.1	2.1	2.1	2.1	2.1	2.6	2.5	2.5	2.6	2.8	2.7	2.9	3.1
XZ009	申扎县	2019-11-27 06:00:00	-5	-3.5	-2.4	-1.4	-0.5	0	0.3	0.3	0.5	0.6	0.6	0.8	1	1.3	1.3	1.5	1.5	1.8	1.9	2.1	2.1	2.1	2.1	2.1	2.6	2.5	2.5	2.6	2.8	2.7	2.8	3
XZ009	申扎县	2019-11-27 07:00:00	-5.4	-3.9	-2.7	-1.7	-0.6	0	0.2	0.3	0.4	0.6	0.6	0.8	1	1.3	1.3	1.5	1.5	1.7	1.9	2.1	2.1	2.1	2.1	2.1	2.6	2.5	2.5	2.6	2.8	2.7	2.8	3
XZ009	申扎县	2019-11-27 08:00:00	-5.7	-4.3	-3	-1.9	-0.8	-0.1	0.1	0.2	0.4	0.6	0.6	0.8	0.9	1.3	1.3	1.5	1.5	1.7	1.9	2.1	2.1	2	2.1	2.1	2.6	2.5	2.5	2.6	2.7	2.7	2.8	3
XZ009	申扎县	2019-11-27 09:00:00	-6.1	-4.6	-3.4	-2.2	-1	-0.2	0.1	0.1	0.3	0.6	0.6	0.8	0.9	1.3	1.3	1.4	1.4	1.7	1.9	2.1	2	2.1	2.1	2.1	2.6	2.5	2.5	2.6	2.7	2.7	2.8	3
XZ009	申扎县	2019-11-27 10:00:00	-4.9	-4.4	-3.5	-2.4	-1.2	-0.4	0	0.1	0.3	0.5	0.5	0.7	0.9	1.2	1.3	1.4	1.4	1.7	1.8	2.1	2	2	2	2.1	2.6	2.5	2.5	2.6	2.7	2.6	2.8	3
XZ009	申扎县	2019-11-27 11:00:00	-2.4	-2.9	-2.7	-2.2	-1.2	-0.5	0	0.1	0.3	0.5	0.5	0.7	0.8	1.2	1.3	1.5	1.4	1.7	1.8	2.1	2	2	2	2.1	2.6	2.5	2.5	2.6	2.7	2.6	2.8	3
XZ009	申扎县	2019-11-27 12:00:00	-0.4	-1.4	-1.7	-1.5	-1	-0.4	0	0	0.3	0.5	0.5	0.6	0.8	1.1	1.2	1.4	1.4	1.6	1.8	2.1	2	2	2	2.1	2.6	2.5	2.5	2.6	2.7	2.6	2.8	3
XZ009	申扎县	2019-11-27 13:00:00	0.8	-0.4	-0.9	-1	-0.6	-0.3	0	0	0.2	0.5	0.5	0.6	0.8	1.1	1.2	1.4	1.3	1.6	1.8	2	2	2	2	2.1	2.6	2.5	2.5	2.6	2.7	2.6	2.8	3
XZ009	申扎县	2019-11-27 14:00:00	1.8	0	-0.4	-0.5	-0.4	-0.1	0	0	0.2	0.5	0.5	0.6	0.8	1.1	1.1	1.3	1.3	1.6	1.8	2.1	2	2	2	2.1	2.6	2.4	2.5	2.6	2.7	2.6	2.8	3
XZ009	申扎县	2019-11-27 15:00:00	3	0.8	0	-0.3	-0.1	0	0	0	0.2	0.4	0.4	0.6	0.8	1.1	1.1	1.3	1.3	1.6	1.8	2.1	2	2	2	2.1	2.6	2.5	2.5	2.6	2.7	2.6	2.8	3
XZ009	申扎县	2019-11-27 16:00:00	3.1	1.4	0.1	0	0	0	0	0	0.2	0.4	0.4	0.6	0.8	1.1	1.1	1.3	1.3	1.6	1.8	2	2	2	2	2.1	2.6	2.4	2.5	2.6	2.6	2.6	2.8	3
XZ009	申扎县	2019-11-27 17:00:00	3	1.5	0.4	0	0	0	0	0.1	0.2	0.4	0.4	0.6	0.7	1.1	1.1	1.3	1.3	1.6	1.8	2	2	2	2	2.1	2.5	2.4	2.5	2.6	2.6	2.6	2.8	3
XZ009	申扎县	2019-11-27 18:00:00	2.1	1.3	0.5	0	0	0	0.1	0.1	0.2	0.4	0.4	0.6	0.7	1.1	1.1	1.3	1.3	1.6	1.8	2	2	2	2	2	2.5	2.4	2.4	2.5	2.6	2.6	2.8	3
XZ009	申扎县	2019-11-27 19:00:00	0.8	0.6	0.3	0	0.1	0.1	0.1	0.1	0.2	0.4	0.4	0.6	0.8	1.1	1.1	1.3	1.3	1.6	1.7	2	1.9	2	2	2	2.5	2.4	2.4	2.5	2.6	2.6	2.8	3
XZ009	申扎县	2019-11-27 20:00:00	-0.2	0	0	0	0.1	0.1	0.1	0.1	0.2	0.4	0.4	0.6	0.7	1	1.1	1.3	1.2	1.5	1.7	2	1.9	1.9	2	2	2.5	2.3	2.4	2.5	2.6	2.6	2.8	3
XZ009	申扎县	2019-11-27 21:00:00	-0.2	0	0	0	0.1	0.1	0.1	0.1	0.2	0.4	0.4	0.6	0.7	1	1.1	1.3	1.3	1.5	1.7	2	1.9	1.9	2	2	2.5	2.3	2.4	2.5	2.6	2.6	2.8	3
XZ009	申扎县	2019-11-27 22:00:00	-0.7	0	0	0	0.1	0.1	0.1	0.1	0.2	0.4	0.4	0.6	0.7	1	1.1	1.2	1.2	1.5	1.7	2	1.8	1.9	1.9	2	2.5	2.3	2.4	2.5	2.6	2.6	2.7	3
XZ009	申扎县	2019-11-28 00:00:00	-1.9	-0.6	0	0	0.1	0.1	0.1	0.1	0.3	0.4	0.4	0.6	0.7	1	1.1	1.2	1.1	1.5	1.6	1.9	1.9	1.9	1.9	2	2.5	2.3	2.3	2.5	2.6	2.5	2.7	2.9
XZ009	申扎县	2019-11-28 01:00:00	-2.2	-0.9	-0.1	0	0.1	0.2	0.2	0.1	0.3	0.5	0.5	0.6	0.7	1	1.1	1.2	1.2	1.5	1.6	1.9	1.8	1.9	1.9	2	2.5	2.3	2.3	2.5	2.6	2.5	2.7	2.9
XZ009	申扎县	2019-11-28 02:00:00	-2.8	-1.4	-0.4	0	0.1	0.2	0.1	0.1	0.3	0.5	0.5	0.6	0.7	1	1.1	1.2	1.2	1.5	1.6	1.9	1.8	1.8	1.9	2	2.5	2.3	2.3	2.5	2.6	2.5	2.7	2.9
XZ009	申扎县	2019-11-28 03:00:00	-3.4	-1.9	-0.8	-0.2	0	0.1	0.1	0.1	0.2	0.5	0.5	0.6	0.7	1	1.1	1.2	1.2	1.5	1.6	1.9	1.8	1.8	1.8	2	2.4	2.3	2.3	2.5	2.6	2.5	2.7	2.9
XZ009	申扎县	2019-11-28 04:00:00	-3.7	-2.3	-1.2	-0.5	0	0.1	0.1	0.1	0.3	0.5	0.5	0.6	0.7	1	1.1	1.2	1.2	1.5	1.6	1.9	1.8	1.8	1.8	2	2.5	2.3	2.3	2.5	2.6	2.5	2.7	2.9
XZ009	申扎县	2019-11-28 05:00:00	-4.1	-2.7	-1.6	-0.8	-0.1	0	0.1	0.1	0.3	0.5	0.5	0.6	0.7	1	1.1	1.2	1.2	1.5	1.6	1.9	1.8	1.8	1.8	1.9	2.4	2.3	2.3	2.5	2.5	2.5	2.7	2.9
XZ009	申扎县	2019-11-28 06:00:00	-4.7	-3.1	-2	-1.1	-0.4	0	0.1	0.1	0.3	0.5	0.5	0.6	0.7	1	1.1	1.2	1.2	1.5	1.6	1.9	1.8	1.8	1.8	1.9	2.4	2.3	2.3	2.5	2.6	2.5	2.6	2.9
XZ009	申扎县	2019-11-28 08:00:00	-5.6	-4.1	-2.9	-1.9	-0.9	-0.2	0	0.1	0.2	0.5	0.5	0.6	0.7	1	1	1.2	1.2	1.5	1.6	1.9	1.8	1.8	1.8	1.9	2.4	2.3	2.3	2.4	2.5	2.5	2.6	2.9
XZ009	申扎县	2019-11-28 10:00:00	-5	-4.4	-3.5	-2.5	-1.4	-0.6	-0.1	0	0.1	0.4	0.4	0.5	0.7	1	1.1	1.2	1.2	1.5	1.6	1.9	1.8	1.8	1.8	1.9	2.4	2.2	2.3	2.4	2.5	2.5	2.6	2.8
XZ009	申扎县	2019-12-01 10:00:00	-9.4	-8.4	-7.2	-5.9	-4.4	-3.2	-2.2	-1.6	-1	-0.4	-0.4	0	0.1	0.5	0.5	0.7	0.6	1	1.1	1.4	1.3	1.3	1.3	1.5	1.9	1.8	1.8	2	2.1	2	2.2	2.4
XZ009	申扎县	2019-12-01 11:00:00	-6	-6.6	-6.4	-5.5	-4.4	-3.3	-2.4	-1.8	-1.1	-0.4	-0.4	0	0.1	0.5	0.5	0.7	0.6	1	1.1	1.4	1.3	1.3	1.3	1.5	1.9	1.8	1.8	2	2.1	2	2.2	2.4
XZ009	申扎县	2019-12-01 12:00:00	-3	-4.3	-4.7	-4.5	-3.9	-3.1	-2.4	-1.9	-1.2	-0.5	-0.5	-0.1	0.1	0.5	0.5	0.6	0.6	1	1.1	1.3	1.3	1.3	1.3	1.4	1.9	1.8	1.8	2	2	2	2.1	2.4
XZ009	申扎县	2019-12-01 13:00:00	-1.1	-2.5	-3.2	-3.4	-3.1	-2.7	-2.2	-1.9	-1.3	-0.6	-0.6	-0.2	0.1	0.4	0.5	0.6	0.6	1	1.1	1.3	1.3	1.3	1.3	1.4	1.9	1.8	1.8	2	2	2	2.1	2.4
XZ009	申扎县	2019-12-01 14:00:00	0	-1.3	-2	-2.4	-2.4	-2.2	-1.9	-1.7	-1.2	-0.7	-0.7	-0.2	0	0.4	0.5	0.6	0.6	0.9	1.1	1.3	1.3	1.3	1.3	1.4	1.9	1.8	1.8	1.9	2	2	2.1	2.3
XZ009	申扎县	2019-12-01 15:00:00	0.8	-0.5	-1.3	-1.7	-1.7	-1.7	-1.5	-1.4	-1.1	-0.6	-0.6	-0.2	0	0.4	0.5	0.6	0.6	0.9	1.1	1.3	1.3	1.3	1.3	1.4	1.9	1.8	1.8	1.9	2	2	2.1	2.3
XZ009	申扎县	2019-12-01 16:00:00	1.2	0	-0.8	-1.2	-1.3	-1.4	-1.3	-1.2	-1	-0.6	-0.6	-0.2	0	0.4	0.5	0.6	0.6	0.9	1.1	1.3	1.3	1.3	1.3	1.4	1.9	1.8	1.8	1.9	2	2	2.1	2.3
XZ009	申扎县	2019-12-01 17:00:00	1.3	0.1	-0.4	-0.9	-0.9	-1	-1	-1	-0.9	-0.5	-0.5	-0.2	0	0.4	0.4	0.6	0.6	0.9	1	1.3	1.3	1.3	1.3	1.4	1.9	1.7	1.8	1.9	2	2	2.1	2.3
XZ009	申扎县	2019-12-01 18:00:00	0.8	0.1	-0.2	-0.6	-0.7	-0.8	-0.9	-0.9	-0.7	-0.4	-0.4	-0.2	0	0.3	0.4	0.6	0.5	0.8	1	1.3	1.3	1.3	1.3	1.3	1.8	1.7	1.8	1.9	2	2	2.1	2.3
XZ009	申扎县	2019-12-01 19:00:00	-0.1	0	-0.2	-0.5	-0.5	-0.6	-0.7	-0.7	-0.6	-0.4	-0.4	-0.2	0	0.3	0.4	0.5	0.5	0.8	1	1.3	1.2	1.2	1.2	1.3	1.8	1.7	1.7	1.9	2	2	2.1	2.3
XZ009	申扎县	2019-12-01 20:00:00	-1.5	-0.5	-0.4	-0.5	-0.4	-0.5	-0.6	-0.7	-0.5	-0.3	-0.3	-0.1	0	0.3	0.4	0.5	0.5	0.8	1	1.3	1.2	1.2	1.2	1.3	1.8	1.7	1.7	1.8	2	2	2.1	2.3
XZ009	申扎县	2019-12-01 21:00:00	-2.8	-1.4	-0.7	-0.6	-0.4	-0.5	-0.5	-0.6	-0.5	-0.3	-0.3	0	0	0.3	0.4	0.5	0.5	0.8	1	1.3	1.2	1.2	1.2	1.3	1.8	1.7	1.7	1.8	2	2	2.1	2.3
XZ009	申扎县	2019-12-01 22:00:00	-3.9	-2.3	-1.4	-1	-0.6	-0.5	-0.5	-0.5	-0.4	-0.2	-0.2	0	0	0.3	0.4	0.5	0.5	0.8	1	1.2	1.2	1.2	1.2	1.3	1.8	1.6	1.7	1.8	2	2	2.1	2.3
XZ009	申扎县	2019-12-01 23:00:00	-4.9	-3.2	-2.2	-1.5	-0.9	-0.6	-0.5	-0.5	-0.4	-0.2	-0.2	0	0	0.3	0.3	0.5	0.5	0.8	1	1.2	1.1	1.1	1.2	1.3	1.8	1.6	1.7	1.8	2	1.9	2.1	2.3
XZ009	申扎县	2019-12-02 00:00:00	-5.7	-4	-2.9	-2.1	-1.3	-0.9	-0.7	-0.6	-0.4	-0.2	-0.2	0	0	0.3	0.3	0.5	0.5	0.8	1	1.2	1.1	1.1	1.1	1.3	1.8	1.6	1.6	1.8	2	1.9	2.1	2.3
XZ009	申扎县	2019-12-02 01:00:00	-6.5	-4.7	-3.5	-2.7	-1.7	-1.2	-0.8	-0.7	-0.5	-0.2	-0.2	0	0	0.3	0.3	0.5	0.5	0.8	1	1.2	1.1	1.1	1.2	1.3	1.8	1.6	1.6	1.8	1.9	1.9	2	2.3
XZ009	申扎县	2019-12-02 02:00:00	-7.2	-5.4	-4.2	-3.2	-2.1	-1.5	-1	-0.8	-0.5	-0.3	-0.3	0	0	0.3	0.3	0.5	0.5	0.8	1	1.2	1.1	1.1	1.1	1.3	1.8	1.6	1.6	1.8	1.9	1.9	2	2.3
XZ009	申扎县	2019-12-02 03:00:00	-7.8	-6	-4.7	-3.7	-2.5	-1.7	-1.2	-1	-0.7	-0.4	-0.4	-0.1	0	0.3	0.3	0.5	0.5	0.8	1	1.2	1.1	1.1	1.1	1.3	1.8	1.6	1.6	1.8	1.9	1.9	2.1	2.3
XZ009	申扎县	2019-12-02 04:00:00	-8.2	-6.5	-5.2	-4.1	-2.9	-2.1	-1.5	-1.2	-0.8	-0.4	-0.4	-0.2	0	0.3	0.3	0.5	0.5	0.8	0.9	1.2	1.1	1.1	1.1	1.3	1.8	1.6	1.6	1.8	1.9	1.8	2	2.3
XZ009	申扎县	2019-12-02 05:00:00	-8.6	-7	-5.7	-4.5	-3.3	-2.4	-1.8	-1.4	-1	-0.5	-0.5	-0.2	0	0.3	0.3	0.5	0.5	0.8	1	1.1	1.1	1.1	1.1	1.3	1.7	1.6	1.6	1.8	1.9	1.8	2	2.2
XZ009	申扎县	2019-12-02 06:00:00	-9	-7.3	-6	-4.9	-3.7	-2.7	-2	-1.6	-1.2	-0.7	-0.7	-0.3	0	0.3	0.3	0.5	0.5	0.8	0.9	1.1	1.1	1.1	1.1	1.2	1.7	1.6	1.6	1.8	1.9	1.9	2	2.2
XZ009	申扎县	2019-12-02 07:00:00	-8.9	-7.5	-6.3	-5.2	-3.9	-3	-2.2	-1.8	-1.3	-0.7	-0.7	-0.4	0	0.3	0.3	0.5	0.5	0.8	0.9	1.1	1.1	1.1	1.1	1.3	1.7	1.6	1.6	1.8	1.9	1.8	2	2.2
XZ009	申扎县	2019-12-02 08:00:00	-9.4	-7.8	-6.6	-5.5	-4.2	-3.2	-2.5	-1.9	-1.4	-0.9	-0.9	-0.4	0	0.3	0.3	0.5	0.5	0.8	0.9	1.1	1.1	1.1	1.1	1.2	1.7	1.6	1.6	1.8	1.9	1.8	2	2.2
XZ009	申扎县	2019-12-02 09:00:00	-9.8	-8.2	-6.9	-5.7	-4.5	-3.4	-2.6	-2.1	-1.5	-1	-1	-0.5	-0.1	0.3	0.3	0.5	0.4	0.7	0.9	1.1	1.1	1.1	1.1	1.2	1.7	1.6	1.6	1.8	1.9	1.8	2	2.2
XZ009	申扎县	2019-12-02 10:00:00	-8.9	-8.1	-7.1	-6	-4.7	-3.7	-2.8	-2.3	-1.7	-1	-1	-0.6	-0.2	0.2	0.3	0.5	0.4	0.7	0.9	1.1	1.1	1.1	1.1	1.2	1.7	1.6	1.6	1.7	1.8	1.8	2	2.2
XZ009	申扎县	2019-12-02 11:00:00	-6.3	-6.7	-6.4	-5.7	-4.7	-3.7	-3	-2.4	-1.8	-1.2	-1.2	-0.7	-0.2	0.2	0.3	0.5	0.4	0.7	0.9	1.1	1.1	1.1	1.1	1.2	1.7	1.6	1.6	1.7	1.8	1.8	2	2.2
XZ009	申扎县	2019-12-02 12:00:00	-3.9	-4.9	-5.1	-4.9	-4.2	-3.6	-2.9	-2.5	-1.9	-1.2	-1.2	-0.8	-0.3	0.2	0.3	0.4	0.4	0.7	0.8	1.1	1.1	1.1	1.1	1.1	1.7	1.6	1.6	1.7	1.8	1.8	2	2.2
XZ009	申扎县	2019-12-02 13:00:00	-1.9	-3.2	-3.7	-3.9	-3.5	-3.2	-2.8	-2.4	-1.9	-1.3	-1.3	-0.9	-0.4	0.1	0.2	0.4	0.4	0.6	0.8	1.1	1	1.1	1.1	1.1	1.6	1.5	1.6	1.7	1.8	1.8	2	2.1
XZ009	申扎县	2019-12-02 14:00:00	-0.1	-1.7	-2.5	-2.9	-2.8	-2.7	-2.5	-2.2	-1.9	-1.3	-1.3	-0.9	-0.4	0.1	0.2	0.4	0.3	0.6	0.8	1.1	1	1	1	1.2	1.6	1.5	1.6	1.7	1.8	1.8	2	2.1
XZ009	申扎县	2019-12-02 15:00:00	0.8	-0.7	-1.5	-2	-2.2	-2.2	-2.1	-2	-1.7	-1.3	-1.3	-0.9	-0.4	0.1	0.2	0.4	0.3	0.6	0.8	1	1	1	1	1.1	1.6	1.5	1.5	1.7	1.8	1.8	2	2.1
XZ009	申扎县	2019-12-02 16:00:00	1.1	-0.2	-0.9	-1.5	-1.6	-1.7	-1.7	-1.7	-1.5	-1.2	-1.2	-0.9	-0.4	0.1	0.1	0.3	0.3	0.6	0.8	1	1	1	1.1	1.1	1.6	1.5	1.5	1.7	1.8	1.8	2	2.1
XZ009	申扎县	2019-12-02 17:00:00	1.1	0	-0.5	-1	-1.2	-1.4	-1.5	-1.5	-1.4	-1	-1	-0.7	-0.4	0.1	0.2	0.3	0.3	0.6	0.8	1	1	1	1	1.1	1.6	1.5	1.5	1.6	1.8	1.8	1.9	2.1
XZ009	申扎县	2019-12-02 18:00:00	0.5	0	-0.4	-0.8	-0.9	-1.1	-1.2	-1.3	-1.2	-0.9	-0.9	-0.7	-0.4	0.1	0.1	0.3	0.3	0.6	0.8	1	1	1	1	1.1	1.6	1.5	1.5	1.6	1.8	1.7	2	2.1
XZ009	申扎县	2019-12-02 19:00:00	-0.4	-0.2	-0.4	-0.7	-0.7	-0.9	-1	-1.1	-1	-0.8	-0.8	-0.6	-0.3	0.1	0.1	0.3	0.3	0.6	0.8	1	1	1	1	1.1	1.6	1.5	1.5	1.6	1.8	1.8	1.9	2.1
XZ009	申扎县	2019-12-02 20:00:00	-1.7	-0.7	-0.5	-0.7	-0.7	-0.7	-0.9	-1	-0.9	-0.7	-0.7	-0.5	-0.3	0	0.1	0.3	0.3	0.6	0.8	1	1	1	1	1.1	1.6	1.5	1.5	1.6	1.8	1.7	1.9	2.1
XZ009	申扎县	2019-12-02 21:00:00	-2.9	-1.5	-1	-0.9	-0.7	-0.7	-0.8	-0.9	-0.8	-0.6	-0.6	-0.5	-0.2	0.1	0.1	0.3	0.3	0.5	0.8	1	1	1	1	1.1	1.6	1.5	1.5	1.6	1.8	1.7	1.9	2.1
XZ009	申扎县	2019-12-02 22:00:00	-3.8	-2.4	-1.7	-1.3	-0.9	-0.7	-0.7	-0.8	-0.7	-0.5	-0.5	-0.4	-0.2	0.1	0.1	0.3	0.3	0.6	0.7	1	1	1	1	1.1	1.6	1.5	1.5	1.6	1.7	1.7	1.9	2.1
XZ009	申扎县	2019-12-02 23:00:00	-4.4	-3	-2.3	-1.7	-1.2	-0.9	-0.8	-0.9	-0.7	-0.5	-0.5	-0.4	-0.2	0.1	0.1	0.3	0.3	0.5	0.7	1	1	1	1	1	1.6	1.4	1.5	1.6	1.7	1.6	1.8	2.1
XZ009	申扎县	2019-12-03 00:00:00	-5	-3.7	-2.9	-2.2	-1.5	-1.1	-0.9	-0.9	-0.7	-0.5	-0.5	-0.4	-0.2	0.1	0.1	0.3	0.3	0.6	0.7	1	0.9	0.9	1	1	1.5	1.4	1.5	1.6	1.7	1.6	1.9	2.1
XZ009	申扎县	2019-12-03 01:00:00	-5.4	-4.2	-3.3	-2.6	-1.9	-1.4	-1.1	-1	-0.8	-0.5	-0.5	-0.4	-0.1	0.1	0.1	0.3	0.3	0.6	0.7	1	0.9	0.9	1	1	1.5	1.4	1.5	1.6	1.7	1.6	1.8	2.1
XZ009	申扎县	2019-12-03 02:00:00	-5.9	-4.6	-3.7	-3	-2.2	-1.6	-1.3	-1.1	-0.9	-0.6	-0.6	-0.4	-0.2	0.1	0.1	0.3	0.3	0.6	0.7	1	0.9	0.9	1	1	1.5	1.4	1.5	1.6	1.7	1.6	1.8	2
XZ009	申扎县	2019-12-03 03:00:00	-6.2	-5	-4.1	-3.4	-2.4	-1.9	-1.4	-1.2	-0.9	-0.7	-0.7	-0.4	-0.2	0.1	0.1	0.3	0.3	0.5	0.7	1	0.9	0.9	0.9	1	1.5	1.4	1.5	1.6	1.7	1.6	1.8	2.1
XZ009	申扎县	2019-12-03 04:00:00	-6.5	-5.3	-4.4	-3.6	-2.7	-2	-1.7	-1.4	-1	-0.7	-0.7	-0.5	-0.2	0.1	0.1	0.3	0.2	0.6	0.7	1	0.9	0.9	0.9	1	1.5	1.4	1.4	1.6	1.6	1.6	1.8	2
XZ009	申扎县	2019-12-03 05:00:00	-6.5	-5.4	-4.6	-3.9	-2.9	-2.3	-1.8	-1.5	-1.2	-0.8	-0.8	-0.5	-0.2	0	0.1	0.3	0.2	0.5	0.7	0.9	0.9	0.9	0.9	1	1.5	1.4	1.4	1.6	1.6	1.6	1.8	2
XZ009	申扎县	2019-12-03 06:00:00	-6.4	-5.5	-4.7	-4	-3.1	-2.4	-2	-1.7	-1.3	-0.9	-0.9	-0.6	-0.4	0	0.1	0.3	0.2	0.5	0.7	1	0.9	0.9	0.9	1	1.5	1.3	1.4	1.6	1.6	1.6	1.8	2
XZ009	申扎县	2019-12-03 07:00:00	-6.3	-5.4	-4.8	-4.1	-3.2	-2.6	-2.1	-1.8	-1.4	-1	-1	-0.7	-0.4	0	0.1	0.3	0.2	0.5	0.7	1	0.9	0.9	0.9	1	1.5	1.3	1.4	1.5	1.6	1.6	1.8	2
XZ009	申扎县	2019-12-03 08:00:00	-6.2	-5.4	-4.8	-4.2	-3.3	-2.7	-2.2	-1.9	-1.5	-1.1	-1.1	-0.8	-0.4	0	0.1	0.3	0.2	0.5	0.7	1	0.9	0.9	0.9	1	1.5	1.3	1.4	1.5	1.6	1.6	1.8	2
XZ009	申扎县	2019-12-03 09:00:00	-6.1	-5.4	-4.8	-4.2	-3.4	-2.7	-2.3	-2	-1.6	-1.2	-1.2	-0.9	-0.5	0	0.1	0.3	0.2	0.5	0.6	0.9	0.8	0.9	0.9	1	1.5	1.4	1.4	1.5	1.6	1.6	1.8	2
XZ009	申扎县	2019-12-03 10:00:00	-5.9	-5.2	-4.7	-4.2	-3.4	-2.8	-2.4	-2.1	-1.7	-1.2	-1.2	-0.9	-0.5	0	0	0.2	0.2	0.5	0.6	0.9	0.9	0.8	0.8	1	1.5	1.3	1.4	1.5	1.6	1.6	1.8	2
XZ009	申扎县	2019-12-03 11:00:00	-5	-4.9	-4.5	-4	-3.4	-2.8	-2.4	-2.1	-1.7	-1.3	-1.3	-0.9	-0.5	0	0	0.2	0.2	0.5	0.6	0.9	0.8	0.8	0.9	1	1.5	1.3	1.3	1.5	1.6	1.6	1.8	2
XZ009	申扎县	2019-12-03 12:00:00	-4	-4.2	-4.1	-3.8	-3.2	-2.8	-2.4	-2.1	-1.8	-1.3	-1.3	-1	-0.5	0	0	0.2	0.1	0.5	0.6	0.9	0.8	0.8	0.8	1	1.5	1.3	1.3	1.5	1.6	1.6	1.8	2
XZ009	申扎县	2019-12-03 13:00:00	-3.1	-3.5	-3.5	-3.4	-3	-2.7	-2.4	-2.2	-1.8	-1.3	-1.3	-1	-0.6	0	0	0.2	0.1	0.5	0.6	0.9	0.8	0.8	0.8	1	1.5	1.3	1.3	1.5	1.6	1.6	1.8	2
XZ009	申扎县	2019-12-03 14:00:00	-3.2	-3.2	-3.2	-3.2	-2.8	-2.5	-2.2	-2	-1.7	-1.4	-1.4	-1	-0.6	0	0	0.2	0.1	0.5	0.6	0.8	0.8	0.8	0.8	1	1.5	1.3	1.3	1.5	1.6	1.6	1.8	2
XZ009	申扎县	2019-12-03 15:00:00	-3.1	-3.1	-3	-3	-2.6	-2.4	-2.1	-2	-1.7	-1.3	-1.3	-1	-0.7	0	0	0.2	0.1	0.5	0.6	0.9	0.8	0.8	0.8	1	1.5	1.3	1.3	1.5	1.6	1.6	1.7	2
XZ009	申扎县	2019-12-03 16:00:00	-3.2	-3	-3	-2.8	-2.4	-2.2	-2	-1.9	-1.7	-1.3	-1.3	-1	-0.7	0	0	0.1	0.1	0.5	0.6	0.8	0.8	0.8	0.8	1	1.4	1.3	1.3	1.5	1.6	1.6	1.8	2
XZ009	申扎县	2019-12-03 17:00:00	-3.5	-3.2	-2.9	-2.7	-2.4	-2.1	-2	-1.9	-1.6	-1.2	-1.2	-1	-0.6	0	0	0.1	0.1	0.5	0.6	0.8	0.8	0.8	0.8	0.9	1.4	1.3	1.3	1.5	1.6	1.6	1.7	1.9
XZ009	申扎县	2019-12-03 18:00:00	-4	-3.4	-3	-2.8	-2.4	-2	-1.9	-1.8	-1.5	-1.2	-1.2	-0.9	-0.7	0	0	0.1	0.1	0.5	0.6	0.8	0.8	0.8	0.8	0.9	1.4	1.3	1.3	1.5	1.6	1.5	1.7	1.9
XZ009	申扎县	2019-12-03 19:00:00	-4.5	-3.7	-3.2	-2.9	-2.4	-2.1	-1.9	-1.8	-1.5	-1.2	-1.2	-1	-0.7	0	0	0.1	0.1	0.5	0.6	0.8	0.8	0.8	0.8	0.9	1.4	1.3	1.3	1.5	1.6	1.6	1.7	1.9
XZ009	申扎县	2019-12-03 20:00:00	-5.2	-4.1	-3.5	-3.1	-2.5	-2.1	-1.9	-1.8	-1.5	-1.2	-1.2	-0.9	-0.6	0	0	0.1	0.1	0.4	0.6	0.8	0.8	0.8	0.8	0.9	1.4	1.3	1.3	1.5	1.6	1.5	1.7	1.9
XZ009	申扎县	2019-12-03 21:00:00	-5.7	-4.6	-3.9	-3.4	-2.7	-2.2	-1.9	-1.8	-1.5	-1.2	-1.2	-0.9	-0.7	-0.1	0	0.1	0.1	0.4	0.6	0.8	0.8	0.8	0.8	0.9	1.4	1.3	1.3	1.5	1.5	1.5	1.7	1.9
XZ009	申扎县	2019-12-03 22:00:00	-6	-4.9	-4.2	-3.5	-2.9	-2.4	-2	-1.9	-1.6	-1.2	-1.2	-1	-0.7	-0.1	0	0.1	0.1	0.4	0.6	0.8	0.8	0.8	0.8	0.9	1.4	1.3	1.3	1.4	1.5	1.5	1.7	1.9
XZ009	申扎县	2019-12-03 23:00:00	-6.3	-5.2	-4.5	-3.8	-3	-2.5	-2.2	-2	-1.6	-1.2	-1.2	-1	-0.6	-0.1	0	0.1	0.1	0.4	0.6	0.8	0.8	0.8	0.8	0.8	1.3	1.2	1.3	1.4	1.5	1.5	1.6	1.9
XZ009	申扎县	2019-12-04 00:00:00	-6.6	-5.5	-4.7	-4	-3.2	-2.7	-2.2	-2	-1.7	-1.3	-1.3	-1	-0.7	-0.1	0	0.1	0.1	0.4	0.5	0.8	0.7	0.8	0.8	0.8	1.3	1.2	1.3	1.4	1.5	1.5	1.6	1.9
XZ009	申扎县	2019-12-04 01:00:00	-7.2	-5.8	-4.9	-4.2	-3.4	-2.7	-2.4	-2.1	-1.7	-1.4	-1.4	-1	-0.7	-0.1	0	0.1	0.1	0.4	0.5	0.8	0.8	0.7	0.8	0.8	1.3	1.2	1.3	1.4	1.5	1.5	1.6	1.9
XZ009	申扎县	2019-12-04 02:00:00	-7.9	-6.3	-5.3	-4.5	-3.6	-2.9	-2.5	-2.2	-1.8	-1.4	-1.4	-1	-0.7	-0.2	0	0.1	0.1	0.4	0.5	0.8	0.7	0.7	0.7	0.8	1.3	1.2	1.2	1.4	1.5	1.5	1.6	1.9
XZ009	申扎县	2019-12-04 03:00:00	-8.6	-6.9	-5.7	-4.8	-3.9	-3.1	-2.6	-2.3	-1.9	-1.5	-1.5	-1.1	-0.7	-0.2	0	0.1	0.1	0.3	0.5	0.8	0.7	0.7	0.7	0.8	1.3	1.2	1.2	1.4	1.5	1.5	1.6	1.8
XZ009	申扎县	2019-12-04 04:00:00	-9.4	-7.5	-6.2	-5.2	-4.1	-3.3	-2.7	-2.4	-2	-1.5	-1.5	-1.2	-0.8	-0.2	0	0.1	0.1	0.3	0.5	0.8	0.7	0.7	0.7	0.8	1.3	1.2	1.2	1.4	1.5	1.5	1.6	1.8
XZ009	申扎县	2019-12-04 05:00:00	-9.9	-8	-6.7	-5.6	-4.4	-3.5	-2.9	-2.6	-2.1	-1.6	-1.6	-1.2	-0.9	-0.2	0	0	0	0.3	0.5	0.8	0.7	0.7	0.7	0.8	1.3	1.2	1.2	1.3	1.5	1.5	1.6	1.8
XZ009	申扎县	2019-12-04 06:00:00	-10.4	-8.5	-7.1	-6	-4.7	-3.8	-3.1	-2.7	-2.2	-1.7	-1.7	-1.3	-0.9	-0.2	0	0	0	0.3	0.5	0.7	0.6	0.7	0.7	0.8	1.3	1.2	1.2	1.3	1.5	1.5	1.6	1.8
XZ009	申扎县	2019-12-04 07:00:00	-10.5	-8.7	-7.4	-6.2	-5	-4	-3.4	-2.9	-2.3	-1.8	-1.8	-1.4	-0.9	-0.2	0	0	0	0.3	0.5	0.7	0.6	0.6	0.6	0.8	1.3	1.1	1.2	1.3	1.5	1.4	1.6	1.8
XZ009	申扎县	2019-12-04 08:00:00	-10.4	-8.9	-7.6	-6.5	-5.2	-4.2	-3.5	-3	-2.4	-1.9	-1.9	-1.4	-1	-0.3	-0.1	0	0	0.3	0.5	0.7	0.6	0.7	0.7	0.8	1.3	1.1	1.1	1.3	1.5	1.4	1.6	1.8
XZ009	申扎县	2019-12-04 09:00:00	-10.6	-9	-7.7	-6.7	-5.4	-4.4	-3.7	-3.2	-2.5	-2	-2	-1.5	-1	-0.3	-0.1	0	0	0.3	0.5	0.7	0.6	0.6	0.6	0.8	1.3	1.1	1.1	1.3	1.5	1.4	1.6	1.8
XZ009	申扎县	2019-12-04 10:00:00	-9.9	-8.9	-7.9	-6.8	-5.5	-4.6	-3.8	-3.3	-2.7	-2.1	-2.1	-1.6	-1.1	-0.4	-0.2	0	0	0.3	0.5	0.7	0.6	0.6	0.6	0.8	1.3	1.1	1.1	1.3	1.5	1.4	1.6	1.8
XZ009	申扎县	2019-12-04 11:00:00	-8.4	-8.1	-7.5	-6.7	-5.6	-4.7	-4	-3.4	-2.9	-2.2	-2.2	-1.7	-1.2	-0.4	-0.2	0	0	0.3	0.5	0.7	0.6	0.6	0.6	0.8	1.3	1.1	1.1	1.3	1.4	1.4	1.6	1.8
XZ009	申扎县	2019-12-04 12:00:00	-6.7	-7	-6.7	-6.3	-5.4	-4.6	-4	-3.5	-2.9	-2.3	-2.3	-1.8	-1.3	-0.4	-0.2	0	0	0.3	0.5	0.7	0.6	0.6	0.6	0.8	1.3	1.1	1.1	1.3	1.4	1.4	1.6	1.8
XZ009	申扎县	2019-12-04 13:00:00	-5.2	-5.8	-5.9	-5.6	-5	-4.4	-3.9	-3.5	-3	-2.4	-2.4	-1.9	-1.4	-0.5	-0.2	0	0	0.3	0.5	0.7	0.6	0.6	0.6	0.8	1.2	1.1	1.1	1.3	1.4	1.4	1.5	1.8
XZ009	申扎县	2019-12-04 14:00:00	-3.7	-4.5	-4.9	-4.9	-4.5	-4.1	-3.7	-3.4	-3	-2.4	-2.4	-1.9	-1.4	-0.5	-0.3	0	0	0.3	0.5	0.6	0.6	0.6	0.6	0.7	1.3	1.1	1.1	1.3	1.4	1.3	1.5	1.8
XZ009	申扎县	2019-12-04 15:00:00	-2.5	-3.4	-3.9	-4.2	-4	-3.7	-3.5	-3.3	-2.9	-2.4	-2.4	-1.9	-1.4	-0.6	-0.3	0	0	0.3	0.5	0.6	0.6	0.6	0.6	0.7	1.2	1.1	1.1	1.3	1.4	1.4	1.5	1.8
XZ009	申扎县	2019-12-04 16:00:00	-1.6	-2.5	-3.1	-3.4	-3.4	-3.3	-3.2	-3	-2.7	-2.3	-2.3	-1.9	-1.4	-0.6	-0.4	0	0	0.3	0.4	0.6	0.6	0.6	0.6	0.7	1.2	1.1	1.1	1.3	1.4	1.3	1.5	1.8
XZ009	申扎县	2019-12-04 17:00:00	-1.3	-2	-2.5	-2.9	-2.9	-2.9	-2.9	-2.8	-2.5	-2.2	-2.2	-1.9	-1.4	-0.6	-0.4	0	0	0.3	0.4	0.6	0.6	0.6	0.6	0.7	1.2	1.1	1.1	1.3	1.4	1.4	1.5	1.8
XZ009	申扎县	2019-12-04 18:00:00	-1.6	-1.9	-2.2	-2.5	-2.5	-2.5	-2.5	-2.6	-2.4	-2	-2	-1.7	-1.4	-0.7	-0.4	-0.1	0	0.2	0.4	0.6	0.6	0.6	0.6	0.7	1.2	1	1.1	1.3	1.4	1.3	1.5	1.8
XZ009	申扎县	2019-12-04 19:00:00	-2.9	-2.5	-2.4	-2.4	-2.3	-2.3	-2.4	-2.4	-2.2	-1.9	-1.9	-1.7	-1.3	-0.7	-0.4	-0.1	0	0.2	0.4	0.6	0.6	0.6	0.6	0.7	1.1	1.1	1.1	1.3	1.3	1.3	1.5	1.7
XZ009	申扎县	2019-12-04 20:00:00	-5	-3.7	-3.1	-2.8	-2.4	-2.2	-2.2	-2.2	-2	-1.8	-1.8	-1.5	-1.2	-0.6	-0.4	-0.1	0	0.2	0.3	0.6	0.6	0.5	0.6	0.7	1.1	1	1.1	1.2	1.3	1.3	1.5	1.7
XZ009	申扎县	2019-12-04 21:00:00	-6.6	-5	-4.1	-3.4	-2.8	-2.4	-2.2	-2.2	-2	-1.7	-1.7	-1.5	-1.2	-0.6	-0.4	-0.1	0	0.1	0.3	0.6	0.6	0.6	0.6	0.7	1.1	1	1.1	1.2	1.3	1.3	1.5	1.7
XZ009	申扎县	2019-12-04 22:00:00	-7.8	-6.1	-5	-4.2	-3.3	-2.7	-2.4	-2.3	-2	-1.7	-1.7	-1.5	-1.2	-0.6	-0.4	-0.1	0	0.2	0.3	0.6	0.5	0.6	0.6	0.6	1.1	1	1.1	1.2	1.3	1.3	1.5	1.7
XZ009	申扎县	2019-12-04 23:00:00	-8.7	-7	-5.8	-4.9	-3.8	-3.1	-2.7	-2.4	-2.1	-1.7	-1.7	-1.5	-1.2	-0.6	-0.4	-0.1	0	0.1	0.3	0.6	0.5	0.5	0.5	0.7	1.1	1	1.1	1.2	1.3	1.3	1.5	1.7
XZ009	申扎县	2019-12-05 00:00:00	-9.3	-7.6	-6.4	-5.4	-4.3	-3.5	-2.9	-2.7	-2.3	-1.9	-1.9	-1.5	-1.2	-0.6	-0.4	-0.2	0	0.1	0.3	0.6	0.5	0.5	0.5	0.6	1.1	1	1	1.2	1.3	1.3	1.5	1.6
XZ009	申扎县	2019-12-05 01:00:00	-10	-8.2	-7	-5.9	-4.7	-3.9	-3.2	-2.9	-2.4	-2	-2	-1.6	-1.3	-0.7	-0.4	-0.2	0	0.1	0.3	0.6	0.5	0.5	0.5	0.6	1.1	1	1	1.2	1.3	1.3	1.5	1.6
XZ009	申扎县	2019-12-05 02:00:00	-10.7	-8.9	-7.5	-6.4	-5.1	-4.2	-3.5	-3.1	-2.6	-2.1	-2.1	-1.7	-1.4	-0.7	-0.5	-0.2	0	0.1	0.3	0.6	0.5	0.5	0.5	0.6	1.1	1	1	1.1	1.3	1.3	1.5	1.6
XZ009	申扎县	2019-12-05 03:00:00	-11.4	-9.4	-8	-6.8	-5.5	-4.5	-3.8	-3.4	-2.9	-2.3	-2.3	-1.9	-1.4	-0.7	-0.5	-0.2	-0.1	0.1	0.3	0.6	0.5	0.5	0.5	0.6	1.1	1	1	1.1	1.3	1.3	1.5	1.6
XZ009	申扎县	2019-12-05 04:00:00	-12	-10	-8.5	-7.3	-5.9	-4.9	-4.1	-3.6	-3	-2.4	-2.4	-2	-1.5	-0.7	-0.5	-0.2	-0.1	0.1	0.3	0.5	0.5	0.5	0.5	0.6	1.1	1	1	1.1	1.3	1.3	1.5	1.6
XZ009	申扎县	2019-12-05 05:00:00	-12.5	-10.5	-9	-7.7	-6.3	-5.2	-4.4	-3.8	-3.2	-2.5	-2.5	-2.1	-1.6	-0.8	-0.5	-0.2	-0.1	0.1	0.3	0.5	0.5	0.5	0.5	0.6	1.1	1	1	1.1	1.3	1.2	1.4	1.6
XZ009	申扎县	2019-12-05 06:00:00	-13	-11	-9.4	-8.1	-6.7	-5.5	-4.6	-4	-3.4	-2.7	-2.7	-2.2	-1.7	-0.9	-0.6	-0.3	-0.2	0.1	0.3	0.5	0.5	0.5	0.5	0.6	1.1	1	1	1.1	1.3	1.2	1.4	1.6
XZ009	申扎县	2019-12-05 07:00:00	-13.3	-11.4	-9.9	-8.5	-7	-5.8	-4.9	-4.2	-3.5	-2.9	-2.9	-2.4	-1.8	-0.9	-0.6	-0.3	-0.2	0	0.3	0.5	0.5	0.5	0.5	0.6	1.1	1	1	1.1	1.3	1.3	1.4	1.6
XZ009	申扎县	2019-12-05 08:00:00	-13.5	-11.6	-10.1	-8.8	-7.3	-6	-5.1	-4.5	-3.7	-3	-3	-2.4	-1.9	-1	-0.7	-0.4	-0.2	0	0.3	0.5	0.5	0.5	0.5	0.6	1.1	1	1	1.1	1.3	1.2	1.4	1.6
XZ009	申扎县	2019-12-05 09:00:00	-13.9	-11.9	-10.4	-9	-7.5	-6.3	-5.4	-4.7	-3.9	-3.2	-3.2	-2.6	-2	-1	-0.7	-0.4	-0.2	0	0.3	0.5	0.5	0.5	0.5	0.6	1.1	1	1	1.1	1.2	1.2	1.4	1.6
XZ009	申扎县	2019-12-05 10:00:00	-12.8	-11.9	-10.6	-9.3	-7.8	-6.6	-5.6	-4.9	-4.1	-3.4	-3.4	-2.7	-2.1	-1	-0.8	-0.4	-0.3	0	0.3	0.5	0.5	0.5	0.5	0.5	1	0.9	1	1.1	1.2	1.2	1.4	1.6
XZ009	申扎县	2019-12-05 11:00:00	-9.7	-10.2	-9.8	-9	-7.8	-6.7	-5.7	-5.1	-4.3	-3.5	-3.5	-2.9	-2.2	-1.2	-0.8	-0.5	-0.3	0	0.2	0.5	0.5	0.4	0.5	0.5	1	0.9	1	1.1	1.2	1.2	1.3	1.6
XZ009	申扎县	2019-12-05 12:00:00	-5.8	-7.5	-8	-7.9	-7.2	-6.4	-5.7	-5.2	-4.4	-3.7	-3.7	-3	-2.4	-1.2	-0.9	-0.5	-0.3	0	0.2	0.5	0.4	0.5	0.5	0.5	1	0.9	1	1.1	1.2	1.1	1.3	1.6
XZ009	申扎县	2019-12-05 13:00:00	-2.2	-4.7	-5.9	-6.4	-6.2	-5.8	-5.4	-5	-4.4	-3.7	-3.7	-3.1	-2.4	-1.3	-1	-0.5	-0.4	0	0.2	0.5	0.4	0.4	0.5	0.5	1	0.9	1	1.1	1.2	1.2	1.3	1.6
XZ009	申扎县	2019-12-05 14:00:00	0.1	-2.4	-3.9	-4.7	-5	-5	-4.9	-4.7	-4.2	-3.6	-3.6	-3.1	-2.5	-1.4	-1	-0.6	-0.4	0	0.2	0.5	0.4	0.4	0.4	0.5	1	0.9	1	1.1	1.2	1.1	1.3	1.5
XZ009	申扎县	2019-12-05 15:00:00	1.8	-0.9	-2.4	-3.4	-3.8	-4.1	-4.2	-4.2	-3.9	-3.4	-3.4	-3	-2.5	-1.4	-1.1	-0.7	-0.4	0	0.1	0.4	0.4	0.4	0.4	0.5	1	0.9	0.9	1.1	1.1	1.1	1.3	1.5
XZ009	申扎县	2019-12-05 16:00:00	2.3	0	-1.4	-2.4	-2.9	-3.3	-3.5	-3.7	-3.5	-3.2	-3.2	-2.9	-2.4	-1.4	-1.1	-0.7	-0.5	0	0.1	0.5	0.4	0.4	0.4	0.5	1	0.9	0.9	1.1	1.1	1.1	1.3	1.5
XZ009	申扎县	2019-12-05 17:00:00	2	0.1	-0.9	-1.7	-2.2	-2.7	-3	-3.2	-3.1	-2.9	-2.9	-2.6	-2.2	-1.4	-1.1	-0.7	-0.5	0	0.1	0.5	0.4	0.4	0.4	0.5	1	0.9	0.9	1	1.1	1.1	1.3	1.5
XZ009	申扎县	2019-12-05 18:00:00	1.3	0.1	-0.5	-1.3	-1.7	-2.2	-2.5	-2.8	-2.8	-2.6	-2.6	-2.4	-2.1	-1.4	-1.1	-0.7	-0.5	0	0.1	0.4	0.4	0.4	0.4	0.5	1	0.8	0.9	1	1.1	1.1	1.3	1.5
XZ009	申扎县	2019-12-05 19:00:00	0	0	-0.5	-1.1	-1.4	-1.9	-2.2	-2.4	-2.5	-2.4	-2.4	-2.2	-1.9	-1.3	-1	-0.7	-0.5	-0.1	0.1	0.4	0.3	0.3	0.4	0.5	1	0.8	0.9	1	1.1	1.1	1.3	1.5
XZ009	申扎县	2019-12-05 20:00:00	-1.9	-0.9	-0.9	-1.1	-1.3	-1.6	-1.9	-2.2	-2.2	-2.1	-2.1	-2	-1.8	-1.2	-1	-0.7	-0.5	-0.1	0.1	0.4	0.3	0.3	0.3	0.5	1	0.8	0.8	1	1.1	1.1	1.3	1.5
XZ009	申扎县	2019-12-05 21:00:00	-3.4	-2	-1.5	-1.4	-1.4	-1.5	-1.7	-2	-2	-1.9	-1.9	-1.8	-1.7	-1.2	-1	-0.7	-0.5	-0.1	0	0.4	0.3	0.3	0.3	0.5	0.9	0.8	0.8	1	1.1	1.1	1.3	1.5
XZ009	申扎县	2019-12-05 22:00:00	-4.5	-3	-2.4	-2	-1.7	-1.7	-1.7	-1.9	-1.9	-1.8	-1.8	-1.7	-1.5	-1.1	-0.9	-0.7	-0.5	-0.1	0	0.3	0.3	0.3	0.3	0.5	1	0.8	0.8	1	1.1	1.1	1.3	1.5
XZ009	申扎县	2019-12-05 23:00:00	-5.5	-4	-3.2	-2.6	-2.1	-1.9	-1.9	-1.9	-1.9	-1.7	-1.7	-1.6	-1.4	-1	-0.9	-0.6	-0.5	-0.1	0	0.3	0.3	0.3	0.3	0.4	0.9	0.8	0.8	1	1.1	1.1	1.3	1.5
XZ009	申扎县	2019-12-06 00:00:00	-6.5	-4.9	-3.9	-3.3	-2.6	-2.2	-2	-2	-1.9	-1.7	-1.7	-1.5	-1.4	-1	-0.9	-0.6	-0.5	-0.1	0	0.3	0.3	0.3	0.3	0.5	0.9	0.8	0.8	1	1.1	1.1	1.3	1.5
XZ009	申扎县	2019-12-06 01:00:00	-7.4	-5.7	-4.7	-3.9	-3.1	-2.5	-2.3	-2.2	-2	-1.7	-1.7	-1.5	-1.3	-0.9	-0.8	-0.6	-0.5	-0.1	0	0.3	0.3	0.3	0.3	0.4	0.9	0.8	0.8	1	1.1	1	1.2	1.5
XZ009	申扎县	2019-12-06 02:00:00	-8	-6.4	-5.3	-4.4	-3.5	-3	-2.5	-2.4	-2.1	-1.8	-1.8	-1.5	-1.4	-0.9	-0.8	-0.5	-0.5	-0.1	0	0.3	0.3	0.3	0.3	0.4	0.9	0.8	0.8	1	1.1	1	1.2	1.5
XZ009	申扎县	2019-12-06 03:00:00	-8.7	-6.9	-5.9	-5	-4	-3.3	-2.8	-2.5	-2.2	-1.9	-1.9	-1.7	-1.4	-0.9	-0.8	-0.5	-0.5	-0.1	0	0.3	0.3	0.3	0.3	0.4	0.9	0.8	0.8	1	1.1	1	1.2	1.5
XZ009	申扎县	2019-12-06 04:00:00	-9.5	-7.6	-6.5	-5.5	-4.4	-3.7	-3.1	-2.8	-2.4	-2	-2	-1.7	-1.5	-0.9	-0.8	-0.5	-0.5	-0.1	0	0.3	0.3	0.3	0.3	0.4	0.9	0.7	0.8	0.9	1	1	1.2	1.4
XZ009	申扎县	2019-12-06 05:00:00	-10.2	-8.3	-7	-6	-4.9	-4	-3.4	-3	-2.6	-2.2	-2.2	-1.9	-1.5	-0.9	-0.8	-0.5	-0.5	-0.1	0	0.3	0.3	0.3	0.3	0.3	0.9	0.8	0.8	1	1	1	1.2	1.4
XZ009	申扎县	2019-12-06 06:00:00	-10.8	-8.9	-7.5	-6.5	-5.3	-4.4	-3.7	-3.3	-2.9	-2.4	-2.4	-2	-1.6	-1	-0.9	-0.5	-0.5	-0.1	0	0.3	0.3	0.3	0.3	0.4	0.9	0.7	0.8	0.9	1	1	1.1	1.4
XZ009	申扎县	2019-12-06 07:00:00	-11.2	-9.4	-8	-7	-5.7	-4.7	-4	-3.5	-3	-2.5	-2.5	-2.1	-1.7	-1	-0.9	-0.6	-0.5	-0.1	0	0.3	0.3	0.3	0.3	0.4	0.9	0.8	0.8	0.9	1	1	1.1	1.4
XZ009	申扎县	2019-12-06 08:00:00	-11.5	-9.7	-8.5	-7.4	-6.1	-5	-4.3	-3.8	-3.2	-2.7	-2.7	-2.2	-1.9	-1.1	-0.9	-0.7	-0.5	-0.1	0	0.3	0.2	0.3	0.3	0.3	0.8	0.7	0.8	0.9	1	1	1.1	1.4
XZ009	申扎县	2019-12-06 09:00:00	-11.9	-10.2	-8.9	-7.7	-6.4	-5.4	-4.6	-4.1	-3.5	-2.9	-2.9	-2.4	-2	-1.2	-1	-0.7	-0.6	-0.2	0	0.3	0.2	0.3	0.3	0.3	0.8	0.7	0.8	0.9	1	1	1.1	1.4
XZ009	申扎县	2019-12-06 10:00:00	-10.7	-10	-9	-8	-6.7	-5.7	-4.9	-4.3	-3.7	-3	-3	-2.6	-2.1	-1.3	-1	-0.7	-0.6	-0.2	0	0.2	0.2	0.2	0.3	0.3	0.8	0.7	0.8	0.9	1	1	1.1	1.4
XZ009	申扎县	2019-12-06 11:00:00	-7.3	-8.3	-8.2	-7.7	-6.7	-5.8	-5	-4.5	-3.9	-3.2	-3.2	-2.8	-2.3	-1.4	-1.1	-0.8	-0.7	-0.2	0	0.2	0.2	0.2	0.3	0.3	0.8	0.7	0.7	0.9	1	1	1.1	1.4
XZ009	申扎县	2019-12-06 12:00:00	-3.9	-5.7	-6.4	-6.5	-6.1	-5.5	-5	-4.6	-4	-3.4	-3.4	-2.9	-2.4	-1.4	-1.2	-0.8	-0.7	-0.2	0	0.2	0.2	0.2	0.2	0.3	0.8	0.7	0.7	0.9	1	1	1.1	1.3
XZ009	申扎县	2019-12-06 13:00:00	-1.2	-3.5	-4.5	-5.2	-5.1	-5	-4.7	-4.4	-4	-3.4	-3.4	-3	-2.4	-1.5	-1.2	-0.9	-0.7	-0.2	0	0.1	0.2	0.2	0.3	0.3	0.8	0.7	0.7	0.9	1	1	1.1	1.3
XZ009	申扎县	2019-12-06 14:00:00	0.4	-1.8	-3	-3.8	-4	-4.2	-4.2	-4.2	-3.8	-3.4	-3.4	-2.9	-2.5	-1.5	-1.3	-0.9	-0.7	-0.3	0	0.1	0.1	0.2	0.2	0.3	0.8	0.7	0.7	0.8	1	1	1.1	1.3
XZ009	申扎县	2019-12-06 15:00:00	1.8	-0.6	-1.9	-2.7	-3.1	-3.5	-3.6	-3.7	-3.5	-3.2	-3.2	-2.8	-2.4	-1.6	-1.3	-0.9	-0.8	-0.3	0	0.1	0.2	0.2	0.2	0.3	0.8	0.6	0.7	0.9	1	1	1.1	1.3
XZ009	申扎县	2019-12-06 16:00:00	2.3	0	-1.1	-1.9	-2.4	-2.8	-3.1	-3.3	-3.2	-2.9	-2.9	-2.7	-2.4	-1.6	-1.4	-1	-0.8	-0.4	0	0.1	0.1	0.2	0.2	0.3	0.8	0.6	0.7	0.8	1	1	1.1	1.3
XZ009	申扎县	2019-12-06 17:00:00	2.3	0.3	-0.6	-1.4	-1.9	-2.3	-2.6	-2.9	-2.9	-2.7	-2.7	-2.5	-2.2	-1.5	-1.3	-1	-0.9	-0.4	0	0.1	0.1	0.2	0.2	0.3	0.8	0.6	0.7	0.8	1	1	1.1	1.3
XZ009	申扎县	2019-12-06 18:00:00	1.6	0.3	-0.4	-1	-1.5	-1.9	-2.2	-2.5	-2.5	-2.4	-2.4	-2.2	-2	-1.5	-1.3	-1	-0.9	-0.4	0	0.1	0.1	0.1	0.2	0.3	0.8	0.6	0.6	0.8	1	0.9	1.1	1.3
XZ009	申扎县	2019-12-06 19:00:00	0.1	0	-0.3	-0.9	-1.2	-1.6	-1.9	-2.2	-2.3	-2.2	-2.2	-2	-1.9	-1.4	-1.2	-1	-0.9	-0.4	-0.1	0.1	0.1	0.2	0.2	0.3	0.8	0.6	0.6	0.8	1	0.9	1.1	1.3
XZ009	申扎县	2019-12-06 20:00:00	-1.7	-0.6	-0.5	-0.9	-1.1	-1.4	-1.7	-2	-2	-2	-2	-1.9	-1.8	-1.4	-1.2	-0.9	-0.9	-0.4	-0.1	0.1	0.1	0.1	0.1	0.3	0.8	0.6	0.7	0.8	1	0.9	1.1	1.3
XZ009	申扎县	2019-12-06 21:00:00	-2.7	-1.5	-1.1	-1.1	-1.1	-1.3	-1.6	-1.8	-1.9	-1.8	-1.8	-1.7	-1.6	-1.2	-1.1	-0.9	-0.8	-0.4	-0.1	0.1	0.1	0.1	0.2	0.3	0.8	0.6	0.6	0.8	0.9	0.9	1.1	1.3
XZ009	申扎县	2019-12-06 22:00:00	-3.9	-2.5	-1.8	-1.5	-1.4	-1.4	-1.5	-1.7	-1.7	-1.7	-1.7	-1.6	-1.5	-1.2	-1.1	-0.9	-0.8	-0.4	-0.1	0	0.1	0.1	0.1	0.3	0.7	0.6	0.6	0.8	0.9	0.9	1	1.3
XZ009	申扎县	2019-12-06 23:00:00	-5.1	-3.5	-2.7	-2.2	-1.7	-1.5	-1.6	-1.7	-1.7	-1.6	-1.6	-1.5	-1.4	-1.1	-1	-0.8	-0.7	-0.4	-0.1	0	0.1	0.1	0.1	0.3	0.8	0.6	0.6	0.8	0.9	0.8	1.1	1.3
XZ009	申扎县	2019-12-07 00:00:00	-6	-4.4	-3.5	-2.9	-2.2	-1.9	-1.8	-1.8	-1.7	-1.5	-1.5	-1.5	-1.4	-1	-1	-0.7	-0.7	-0.4	-0.1	0.1	0.1	0.1	0.1	0.3	0.8	0.6	0.6	0.8	0.9	0.9	1	1.3
XZ009	申扎县	2019-12-07 01:00:00	-6.7	-5.1	-4.1	-3.4	-2.7	-2.2	-2	-1.9	-1.8	-1.6	-1.6	-1.5	-1.3	-1	-0.9	-0.7	-0.7	-0.4	-0.1	0.1	0.1	0.1	0.1	0.2	0.7	0.6	0.6	0.8	0.9	0.8	1	1.3
XZ009	申扎县	2019-12-07 02:00:00	-7.3	-5.7	-4.7	-4	-3.2	-2.6	-2.3	-2.1	-1.9	-1.7	-1.7	-1.5	-1.3	-1	-0.9	-0.7	-0.7	-0.3	-0.1	0	0.1	0.1	0.1	0.3	0.8	0.6	0.6	0.8	0.9	0.8	1	1.3
XZ009	申扎县	2019-12-07 03:00:00	-8.1	-6.4	-5.3	-4.5	-3.6	-2.9	-2.5	-2.4	-2	-1.7	-1.7	-1.5	-1.4	-1	-0.9	-0.7	-0.7	-0.3	0	0.1	0.1	0.1	0.1	0.2	0.8	0.6	0.6	0.8	0.8	0.8	1	1.3
XZ009	申扎县	2019-12-07 04:00:00	-8.9	-7	-5.9	-5	-4	-3.3	-2.8	-2.5	-2.2	-1.9	-1.9	-1.7	-1.4	-1	-0.9	-0.7	-0.7	-0.3	0	0	0.1	0.1	0.1	0.2	0.7	0.6	0.6	0.8	0.9	0.8	1	1.2
XZ009	申扎县	2019-12-07 05:00:00	-9.2	-7.5	-6.4	-5.5	-4.4	-3.7	-3.1	-2.8	-2.4	-2	-2	-1.7	-1.5	-1	-0.9	-0.7	-0.7	-0.3	0	0	0.1	0.1	0.1	0.2	0.7	0.6	0.6	0.8	0.8	0.8	1	1.2
XZ009	申扎县	2019-12-07 06:00:00	-9.9	-8	-6.9	-5.9	-4.9	-4	-3.4	-3	-2.7	-2.2	-2.2	-1.9	-1.5	-1	-0.9	-0.7	-0.7	-0.3	0	0	0.1	0.1	0.1	0.2	0.7	0.6	0.6	0.8	0.8	0.8	1	1.2
XZ009	申扎县	2019-12-07 07:00:00	-10.5	-8.6	-7.4	-6.4	-5.2	-4.4	-3.7	-3.3	-2.9	-2.4	-2.4	-2	-1.7	-1.1	-0.9	-0.7	-0.7	-0.3	0	0	0.1	0.1	0.1	0.2	0.7	0.6	0.6	0.7	0.9	0.8	1	1.2
XZ009	申扎县	2019-12-07 08:00:00	-11.2	-9.2	-7.9	-6.9	-5.6	-4.7	-4	-3.5	-3	-2.5	-2.5	-2.2	-1.8	-1.2	-1	-0.7	-0.7	-0.4	-0.1	0	0.1	0.1	0.1	0.2	0.7	0.6	0.6	0.8	0.8	0.8	1	1.2
XZ009	申扎县	2019-12-07 09:00:00	-11.6	-9.7	-8.4	-7.3	-6	-5	-4.3	-3.8	-3.3	-2.7	-2.7	-2.3	-1.9	-1.2	-1	-0.8	-0.7	-0.4	-0.1	0	0	0.1	0.1	0.2	0.7	0.6	0.6	0.7	0.8	0.8	1	1.2
XZ009	申扎县	2019-12-07 10:00:00	-10.9	-9.8	-8.7	-7.7	-6.4	-5.4	-4.5	-4	-3.5	-2.9	-2.9	-2.5	-2	-1.3	-1.1	-0.9	-0.7	-0.4	-0.1	0	0	0.1	0.1	0.2	0.7	0.5	0.6	0.7	0.8	0.8	1	1.2
XZ009	申扎县	2019-12-07 11:00:00	-7.8	-8.4	-8.2	-7.5	-6.5	-5.5	-4.8	-4.3	-3.7	-3.1	-3.1	-2.6	-2.2	-1.4	-1.2	-0.9	-0.8	-0.4	-0.1	0	0	0.1	0.1	0.2	0.6	0.5	0.6	0.7	0.8	0.8	1	1.2
XZ009	申扎县	2019-12-07 12:00:00	-4.3	-6	-6.5	-6.5	-6	-5.4	-4.9	-4.4	-3.9	-3.2	-3.2	-2.8	-2.3	-1.5	-1.2	-0.9	-0.9	-0.4	-0.2	0	0	0.1	0.1	0.2	0.6	0.5	0.6	0.7	0.8	0.8	1	1.2
XZ009	申扎县	2019-12-07 13:00:00	-1.1	-3.5	-4.6	-5.2	-5.1	-4.9	-4.6	-4.3	-3.9	-3.4	-3.4	-2.9	-2.4	-1.6	-1.4	-1	-0.9	-0.4	-0.2	0	0	0.1	0.1	0.2	0.7	0.5	0.6	0.7	0.8	0.8	1	1.2
XZ009	申扎县	2019-12-07 14:00:00	1.1	-1.5	-2.9	-3.7	-4	-4.2	-4.1	-4	-3.7	-3.3	-3.3	-2.9	-2.5	-1.6	-1.4	-1	-0.9	-0.5	-0.2	0	0	0.1	0.1	0.2	0.7	0.5	0.5	0.7	0.8	0.8	1	1.2
XZ009	申扎县	2019-12-07 15:00:00	1.8	-0.5	-1.7	-2.6	-3	-3.4	-3.5	-3.6	-3.5	-3.1	-3.1	-2.8	-2.4	-1.7	-1.4	-1.1	-0.9	-0.5	-0.2	0	0	0	0.1	0.1	0.6	0.5	0.5	0.7	0.8	0.8	1	1.1
XZ009	申扎县	2019-12-07 16:00:00	2	0	-1	-1.9	-2.3	-2.7	-3	-3.2	-3.1	-2.9	-2.9	-2.7	-2.4	-1.7	-1.4	-1.1	-1	-0.5	-0.2	0	0	0	0.1	0.2	0.6	0.5	0.5	0.7	0.8	0.8	1	1.1
XZ009	申扎县	2019-12-07 17:00:00	2	0.3	-0.6	-1.4	-1.8	-2.2	-2.5	-2.8	-2.8	-2.7	-2.7	-2.5	-2.2	-1.6	-1.4	-1.1	-1	-0.5	-0.2	0	0	0	0.1	0.1	0.6	0.5	0.5	0.6	0.8	0.8	1	1.1
XZ009	申扎县	2019-12-07 18:00:00	1.4	0.3	-0.4	-1	-1.4	-1.9	-2.2	-2.5	-2.5	-2.4	-2.4	-2.3	-2	-1.5	-1.4	-1.1	-1	-0.5	-0.2	0	0	0	0.1	0.1	0.6	0.5	0.5	0.7	0.8	0.8	0.9	1.1
XZ009	申扎县	2019-12-07 19:00:00	0	0	-0.4	-0.9	-1.2	-1.5	-1.9	-2.2	-2.2	-2.2	-2.2	-2.1	-1.9	-1.5	-1.4	-1.1	-1	-0.5	-0.3	0	0	0	0	0.1	0.6	0.5	0.5	0.7	0.8	0.8	0.9	1.1
XZ009	申扎县	2019-12-07 20:00:00	-1.6	-0.7	-0.7	-0.9	-1	-1.4	-1.7	-2	-2	-2	-2	-1.9	-1.8	-1.4	-1.3	-1	-1	-0.5	-0.3	0	0	0	0	0.1	0.6	0.5	0.5	0.6	0.8	0.8	0.9	1.1
XZ009	申扎县	2019-12-07 21:00:00	-3	-1.7	-1.2	-1.2	-1.2	-1.4	-1.6	-1.9	-1.9	-1.9	-1.9	-1.8	-1.7	-1.4	-1.2	-1	-0.9	-0.5	-0.3	0	0	0	0	0.1	0.6	0.5	0.5	0.6	0.8	0.8	0.9	1.1
XZ009	申扎县	2019-12-07 22:00:00	-4.3	-2.7	-2	-1.7	-1.4	-1.4	-1.5	-1.7	-1.7	-1.7	-1.7	-1.7	-1.5	-1.2	-1.2	-1	-0.9	-0.5	-0.3	0	0	0	0	0.1	0.6	0.5	0.5	0.6	0.8	0.7	0.9	1.1
XZ009	申扎县	2019-12-07 23:00:00	-5.3	-3.7	-2.9	-2.4	-1.9	-1.7	-1.7	-1.7	-1.7	-1.6	-1.6	-1.5	-1.5	-1.2	-1.1	-0.9	-0.9	-0.5	-0.3	0	0	0	0	0.1	0.6	0.5	0.5	0.6	0.8	0.7	0.9	1.1
XZ009	申扎县	2019-12-08 00:00:00	-6	-4.5	-3.5	-2.9	-2.4	-2	-1.9	-1.9	-1.7	-1.6	-1.6	-1.5	-1.4	-1.1	-1	-0.9	-0.9	-0.5	-0.3	0	0	0	0	0.1	0.6	0.5	0.5	0.6	0.7	0.7	0.9	1.1
XZ009	申扎县	2019-12-08 01:00:00	-6.8	-5.2	-4.2	-3.5	-2.8	-2.4	-2.1	-2	-1.9	-1.7	-1.7	-1.5	-1.4	-1	-1	-0.9	-0.9	-0.5	-0.3	0	0	0	0	0.1	0.6	0.5	0.5	0.6	0.7	0.7	0.9	1.1
XZ009	申扎县	2019-12-08 02:00:00	-7.5	-5.9	-4.8	-4	-3.2	-2.7	-2.4	-2.2	-2	-1.7	-1.7	-1.5	-1.4	-1.1	-1	-0.8	-0.9	-0.5	-0.2	0	0	0	0	0.1	0.6	0.5	0.5	0.6	0.7	0.7	0.9	1.1
XZ009	申扎县	2019-12-08 03:00:00	-8.2	-6.4	-5.4	-4.6	-3.7	-3	-2.6	-2.4	-2.1	-1.9	-1.9	-1.7	-1.4	-1.1	-1	-0.8	-0.8	-0.4	-0.2	0	0	0	0	0.1	0.6	0.5	0.5	0.6	0.8	0.7	0.9	1.1
XZ009	申扎县	2019-12-08 04:00:00	-9	-7.1	-6	-5.1	-4.1	-3.4	-2.9	-2.7	-2.3	-2	-2	-1.7	-1.5	-1.1	-1	-0.8	-0.8	-0.4	-0.2	0	0	0	0	0.1	0.6	0.5	0.5	0.6	0.7	0.7	0.9	1.1
XZ009	申扎县	2019-12-08 05:00:00	-9.7	-7.7	-6.5	-5.5	-4.5	-3.7	-3.2	-2.9	-2.5	-2.1	-2.1	-1.9	-1.5	-1.1	-1	-0.8	-0.8	-0.4	-0.2	0	0	0	0	0.1	0.6	0.5	0.5	0.6	0.7	0.7	0.8	1.1
XZ009	申扎县	2019-12-08 06:00:00	-10.5	-8.4	-7.1	-6.1	-5	-4.1	-3.5	-3.2	-2.7	-2.3	-2.3	-2	-1.7	-1.2	-1	-0.8	-0.8	-0.4	-0.2	0	0	0	0	0.1	0.6	0.5	0.5	0.6	0.7	0.6	0.9	1.1
XZ009	申扎县	2019-12-08 07:00:00	-11.1	-9	-7.7	-6.6	-5.4	-4.5	-3.8	-3.4	-2.9	-2.5	-2.5	-2.1	-1.8	-1.2	-1	-0.9	-0.8	-0.5	-0.2	0	0	0	0	0.1	0.6	0.5	0.5	0.6	0.7	0.7	0.9	1.1
XZ009	申扎县	2019-12-08 08:00:00	-11.6	-9.5	-8.2	-7.1	-5.9	-4.9	-4.2	-3.7	-3.2	-2.7	-2.7	-2.3	-1.9	-1.3	-1.2	-0.9	-0.9	-0.5	-0.2	0	0	0	0	0.1	0.6	0.5	0.5	0.6	0.7	0.6	0.8	1.1
XZ009	申扎县	2019-12-08 09:00:00	-12.2	-10	-8.7	-7.5	-6.2	-5.2	-4.4	-4	-3.4	-2.9	-2.9	-2.4	-2	-1.4	-1.2	-0.9	-0.9	-0.5	-0.2	0	0	0	0	0.1	0.6	0.4	0.5	0.6	0.7	0.7	0.8	1
XZ009	申扎县	2019-12-08 10:00:00	-11.4	-10.2	-9	-8	-6.6	-5.5	-4.7	-4.2	-3.7	-3	-3	-2.6	-2.2	-1.5	-1.2	-1	-0.9	-0.5	-0.3	0	0	0	0	0.1	0.6	0.5	0.5	0.6	0.7	0.7	0.8	1.1
XZ009	申扎县	2019-12-08 11:00:00	-8.2	-8.7	-8.4	-7.8	-6.7	-5.8	-5	-4.5	-3.9	-3.2	-3.2	-2.8	-2.3	-1.5	-1.4	-1	-1	-0.5	-0.3	0	0	0	0	0.1	0.5	0.4	0.5	0.6	0.7	0.6	0.8	1.1
XZ009	申扎县	2019-12-08 12:00:00	-4.5	-6.4	-6.9	-6.9	-6.2	-5.6	-5	-4.6	-4	-3.4	-3.4	-2.9	-2.5	-1.7	-1.4	-1.1	-1	-0.6	-0.4	0	0	0	0	0.1	0.6	0.4	0.5	0.6	0.7	0.6	0.8	1.1
XZ009	申扎县	2019-12-08 13:00:00	-1.3	-3.8	-4.9	-5.4	-5.3	-5.1	-4.8	-4.5	-4	-3.5	-3.5	-3	-2.5	-1.7	-1.5	-1.2	-1	-0.6	-0.4	0	0	0	0	0.1	0.6	0.4	0.5	0.6	0.7	0.6	0.8	1
XZ009	申扎县	2019-12-08 14:00:00	0.8	-1.8	-3.1	-3.9	-4.2	-4.4	-4.3	-4.2	-3.9	-3.5	-3.5	-3	-2.6	-1.8	-1.5	-1.2	-1	-0.7	-0.4	0	0	0	0	0.1	0.5	0.4	0.4	0.6	0.6	0.6	0.8	1
XZ009	申扎县	2019-12-08 15:00:00	1.8	-0.6	-1.9	-2.8	-3.2	-3.5	-3.7	-3.8	-3.6	-3.3	-3.3	-3	-2.6	-1.8	-1.5	-1.2	-1.1	-0.7	-0.4	-0.1	0	0	0	0.1	0.5	0.5	0.5	0.6	0.7	0.6	0.8	1
XZ009	申扎县	2019-12-08 16:00:00	1.8	0	-1.2	-2	-2.5	-2.9	-3.2	-3.4	-3.3	-3	-3	-2.8	-2.5	-1.8	-1.6	-1.2	-1.1	-0.7	-0.4	-0.1	0	0	0	0	0.5	0.4	0.4	0.6	0.6	0.6	0.8	1
XZ009	申扎县	2019-12-08 17:00:00	1.7	0.1	-0.7	-1.5	-1.9	-2.4	-2.7	-3	-3	-2.8	-2.8	-2.6	-2.4	-1.8	-1.5	-1.2	-1.2	-0.7	-0.4	-0.1	-0.1	0	0	0.1	0.5	0.4	0.4	0.6	0.6	0.6	0.8	1
XZ009	申扎县	2019-12-08 18:00:00	1.1	0	-0.5	-1.2	-1.5	-2	-2.4	-2.6	-2.7	-2.5	-2.5	-2.4	-2.2	-1.7	-1.5	-1.3	-1.2	-0.7	-0.4	-0.2	-0.1	0	0	0	0.5	0.4	0.4	0.6	0.6	0.6	0.8	1
XZ009	申扎县	2019-12-08 19:00:00	-0.2	-0.2	-0.5	-1	-1.3	-1.7	-2	-2.4	-2.4	-2.3	-2.3	-2.2	-2	-1.7	-1.5	-1.2	-1.2	-0.7	-0.5	-0.2	-0.1	0	0	0	0.5	0.4	0.4	0.6	0.6	0.6	0.8	1
XZ009	申扎县	2019-12-08 20:00:00	-1.7	-0.9	-0.9	-1.1	-1.2	-1.5	-1.9	-2.1	-2.2	-2.1	-2.1	-2	-1.9	-1.5	-1.4	-1.2	-1.2	-0.7	-0.5	-0.2	-0.1	0	0	0	0.5	0.4	0.4	0.5	0.6	0.6	0.8	1
XZ009	申扎县	2019-12-08 21:00:00	-3.4	-2	-1.5	-1.4	-1.4	-1.5	-1.7	-1.9	-2	-2	-2	-1.9	-1.8	-1.5	-1.4	-1.2	-1.1	-0.7	-0.5	-0.2	-0.1	0	0	0	0.5	0.4	0.4	0.5	0.6	0.6	0.8	1
XZ009	申扎县	2019-12-08 22:00:00	-4.9	-3.1	-2.4	-2	-1.7	-1.6	-1.7	-1.9	-1.9	-1.9	-1.9	-1.8	-1.7	-1.4	-1.4	-1.1	-1.1	-0.7	-0.5	-0.2	-0.1	0	0	0	0.5	0.4	0.4	0.5	0.6	0.6	0.8	1
XZ009	申扎县	2019-12-08 23:00:00	-6	-4.2	-3.3	-2.7	-2.2	-1.9	-1.9	-1.9	-1.9	-1.8	-1.8	-1.7	-1.6	-1.3	-1.2	-1	-1	-0.7	-0.5	-0.2	-0.1	0	0	0	0.5	0.3	0.4	0.5	0.6	0.6	0.8	1
XZ009	申扎县	2019-12-09 00:00:00	-6.9	-5.1	-4.1	-3.4	-2.7	-2.3	-2.1	-2.1	-1.9	-1.8	-1.8	-1.7	-1.5	-1.3	-1.2	-1	-1	-0.7	-0.4	-0.2	-0.1	0	0	0	0.5	0.3	0.4	0.5	0.6	0.6	0.8	1
XZ009	申扎县	2019-12-09 01:00:00	-7.8	-5.9	-4.9	-4	-3.2	-2.7	-2.4	-2.2	-2	-1.9	-1.9	-1.7	-1.5	-1.2	-1.2	-1	-1	-0.7	-0.4	-0.1	-0.1	0	0	0	0.5	0.3	0.4	0.5	0.6	0.6	0.8	1
XZ009	申扎县	2019-12-09 02:00:00	-8.5	-6.5	-5.5	-4.7	-3.7	-3	-2.7	-2.5	-2.2	-2	-2	-1.7	-1.6	-1.2	-1.2	-1	-1	-0.7	-0.4	-0.2	-0.1	0	0	0	0.5	0.3	0.4	0.5	0.6	0.6	0.8	1
XZ009	申扎县	2019-12-09 03:00:00	-9.1	-7.2	-6.1	-5.2	-4.2	-3.5	-3	-2.7	-2.4	-2	-2	-1.9	-1.6	-1.2	-1.1	-1	-1	-0.6	-0.4	-0.1	-0.1	0	0	0	0.5	0.3	0.4	0.5	0.6	0.6	0.8	1
XZ009	申扎县	2019-12-09 04:00:00	-9.7	-7.8	-6.7	-5.7	-4.6	-3.9	-3.3	-3	-2.6	-2.2	-2.2	-2	-1.7	-1.2	-1.2	-1	-1	-0.6	-0.4	-0.1	-0.1	0	0	0	0.5	0.3	0.3	0.5	0.6	0.6	0.8	1
XZ009	申扎县	2019-12-09 05:00:00	-10.2	-8.4	-7.2	-6.2	-5.1	-4.2	-3.6	-3.2	-2.9	-2.4	-2.4	-2.1	-1.8	-1.3	-1.2	-1	-1	-0.6	-0.4	-0.1	-0.1	0	0	0	0.5	0.3	0.3	0.5	0.6	0.6	0.7	1
XZ009	申扎县	2019-12-09 06:00:00	-10.6	-8.8	-7.6	-6.6	-5.5	-4.6	-3.9	-3.5	-3	-2.6	-2.6	-2.2	-1.9	-1.4	-1.2	-1	-1	-0.6	-0.4	-0.1	-0.1	0	0	0	0.5	0.3	0.3	0.5	0.6	0.6	0.7	1
XZ009	申扎县	2019-12-09 07:00:00	-11.1	-9.2	-8	-7	-5.9	-4.9	-4.2	-3.8	-3.3	-2.7	-2.7	-2.4	-2	-1.4	-1.3	-1	-1	-0.6	-0.4	-0.2	-0.1	-0.1	0	0	0.5	0.3	0.3	0.5	0.6	0.6	0.7	1
XZ009	申扎县	2019-12-09 08:00:00	-11.7	-9.7	-8.5	-7.4	-6.2	-5.2	-4.5	-4	-3.5	-3	-3	-2.5	-2.2	-1.5	-1.4	-1	-1	-0.7	-0.4	-0.2	-0.2	-0.1	0	0	0.5	0.3	0.3	0.5	0.6	0.5	0.7	1
XZ009	申扎县	2019-12-09 09:00:00	-12.4	-10.3	-9	-7.9	-6.5	-5.5	-4.8	-4.3	-3.7	-3.2	-3.2	-2.7	-2.3	-1.5	-1.4	-1.2	-1.1	-0.7	-0.5	-0.2	-0.2	-0.1	0	0	0.5	0.3	0.3	0.5	0.6	0.5	0.7	1
XZ009	申扎县	2019-12-09 10:00:00	-11.6	-10.4	-9.4	-8.2	-6.9	-5.9	-5	-4.5	-3.9	-3.4	-3.4	-2.9	-2.4	-1.7	-1.5	-1.2	-1.1	-0.7	-0.5	-0.2	-0.2	-0.1	0	0	0.5	0.3	0.3	0.5	0.6	0.5	0.7	0.9
XZ009	申扎县	2019-12-09 11:00:00	-8.6	-9	-8.7	-8.1	-7	-6.1	-5.3	-4.8	-4.2	-3.5	-3.5	-3	-2.6	-1.8	-1.5	-1.2	-1.2	-0.7	-0.5	-0.2	-0.2	-0.1	0	0	0.5	0.3	0.3	0.5	0.6	0.5	0.7	0.9
XZ009	申扎县	2019-12-09 12:00:00	-5	-6.7	-7.2	-7.2	-6.5	-5.9	-5.4	-4.9	-4.4	-3.7	-3.7	-3.2	-2.7	-1.9	-1.6	-1.3	-1.2	-0.8	-0.5	-0.2	-0.2	-0.1	0	0	0.5	0.3	0.3	0.5	0.6	0.5	0.7	1
XZ009	申扎县	2019-12-09 13:00:00	-2	-4.2	-5.3	-5.7	-5.7	-5.4	-5.1	-4.8	-4.4	-3.8	-3.8	-3.3	-2.9	-2	-1.7	-1.4	-1.2	-0.8	-0.5	-0.2	-0.2	-0.1	0	0	0.5	0.3	0.3	0.5	0.6	0.5	0.7	0.9
XZ009	申扎县	2019-12-09 14:00:00	-0.4	-2.6	-3.7	-4.4	-4.6	-4.7	-4.6	-4.5	-4.2	-3.7	-3.7	-3.3	-2.9	-2	-1.7	-1.4	-1.3	-0.9	-0.5	-0.2	-0.2	-0.2	0	0	0.5	0.3	0.3	0.5	0.6	0.5	0.7	1
XZ009	申扎县	2019-12-09 15:00:00	0.7	-1.4	-2.5	-3.3	-3.7	-3.9	-4	-4.1	-3.9	-3.5	-3.5	-3.2	-2.9	-2	-1.8	-1.4	-1.3	-0.9	-0.6	-0.2	-0.2	-0.2	0	0	0.4	0.3	0.3	0.5	0.6	0.5	0.7	1
XZ009	申扎县	2019-12-09 16:00:00	1.3	-0.5	-1.7	-2.4	-2.9	-3.2	-3.5	-3.7	-3.6	-3.4	-3.4	-3.1	-2.7	-2	-1.8	-1.5	-1.4	-0.9	-0.6	-0.3	-0.2	-0.2	-0.1	0	0.4	0.3	0.3	0.5	0.6	0.5	0.7	0.9
XZ009	申扎县	2019-12-09 17:00:00	1.4	-0.1	-1.1	-1.9	-2.3	-2.7	-3	-3.3	-3.2	-3	-3	-2.9	-2.6	-2	-1.8	-1.5	-1.4	-0.9	-0.6	-0.3	-0.2	-0.2	-0.1	0	0.4	0.3	0.3	0.5	0.5	0.5	0.6	0.9
XZ009	申扎县	2019-12-09 18:00:00	0.8	0	-0.8	-1.5	-1.9	-2.3	-2.6	-2.9	-2.9	-2.8	-2.8	-2.7	-2.5	-1.9	-1.8	-1.5	-1.4	-0.9	-0.7	-0.3	-0.3	-0.2	-0.1	0	0.4	0.3	0.3	0.5	0.5	0.5	0.6	0.9
XZ009	申扎县	2019-12-09 19:00:00	-0.5	-0.5	-0.8	-1.3	-1.5	-2	-2.3	-2.6	-2.7	-2.5	-2.5	-2.5	-2.3	-1.9	-1.7	-1.5	-1.4	-0.9	-0.7	-0.4	-0.3	-0.2	-0.1	0	0.4	0.3	0.3	0.5	0.5	0.5	0.6	0.9
XZ009	申扎县	2019-12-09 20:00:00	-2.5	-1.4	-1.2	-1.4	-1.5	-1.8	-2	-2.4	-2.4	-2.4	-2.4	-2.3	-2.2	-1.8	-1.7	-1.4	-1.4	-0.9	-0.7	-0.4	-0.3	-0.2	-0.2	0	0.4	0.3	0.3	0.5	0.5	0.5	0.6	0.9
XZ009	申扎县	2019-12-09 21:00:00	-4.1	-2.7	-2.1	-1.9	-1.7	-1.8	-2	-2.2	-2.2	-2.2	-2.2	-2.2	-2	-1.7	-1.6	-1.4	-1.3	-0.9	-0.7	-0.4	-0.3	-0.2	-0.2	0	0.4	0.3	0.3	0.4	0.5	0.5	0.6	0.9
XZ009	申扎县	2019-12-09 22:00:00	-4.9	-3.5	-2.9	-2.5	-2.1	-2	-2	-2.2	-2.2	-2	-2	-2	-1.9	-1.6	-1.5	-1.3	-1.3	-0.9	-0.7	-0.4	-0.3	-0.2	-0.2	0	0.4	0.3	0.3	0.4	0.5	0.5	0.6	0.9
XZ009	申扎县	2019-12-09 23:00:00	-6.2	-4.5	-3.7	-3.2	-2.5	-2.3	-2.2	-2.2	-2.2	-2	-2	-1.9	-1.9	-1.5	-1.5	-1.3	-1.2	-0.9	-0.7	-0.4	-0.3	-0.2	-0.2	0	0.4	0.3	0.3	0.4	0.5	0.5	0.6	0.8
XZ009	申扎县	2019-12-10 00:00:00	-6.9	-5.3	-4.4	-3.8	-3	-2.7	-2.4	-2.4	-2.2	-2	-2	-2	-1.8	-1.5	-1.4	-1.2	-1.2	-0.9	-0.7	-0.3	-0.3	-0.3	-0.2	0	0.3	0.2	0.3	0.4	0.5	0.5	0.6	0.9
XZ009	申扎县	2019-12-10 01:00:00	-6.8	-5.7	-4.9	-4.2	-3.5	-3	-2.7	-2.6	-2.4	-2.1	-2.1	-2	-1.8	-1.5	-1.4	-1.2	-1.2	-0.9	-0.6	-0.4	-0.4	-0.3	-0.2	0	0.3	0.2	0.3	0.4	0.5	0.5	0.6	0.8
XZ009	申扎县	2019-12-10 02:00:00	-6.9	-5.7	-5.1	-4.5	-3.8	-3.3	-2.9	-2.8	-2.5	-2.2	-2.2	-2	-1.8	-1.4	-1.4	-1.2	-1.2	-0.8	-0.6	-0.3	-0.3	-0.3	-0.2	0	0.3	0.2	0.2	0.4	0.5	0.5	0.6	0.8
XZ009	申扎县	2019-12-10 03:00:00	-7.4	-6.1	-5.4	-4.8	-4	-3.5	-3.2	-2.9	-2.7	-2.3	-2.3	-2.1	-1.9	-1.4	-1.4	-1.2	-1.2	-0.8	-0.6	-0.3	-0.3	-0.3	-0.2	0	0.3	0.2	0.3	0.4	0.5	0.5	0.6	0.8
XZ009	申扎县	2019-12-10 04:00:00	-8	-6.6	-5.8	-5.1	-4.3	-3.7	-3.3	-3.1	-2.8	-2.4	-2.4	-2.2	-1.9	-1.5	-1.4	-1.2	-1.2	-0.8	-0.6	-0.3	-0.3	-0.3	-0.2	0	0.3	0.2	0.3	0.4	0.5	0.5	0.6	0.8
XZ009	申扎县	2019-12-10 05:00:00	-8.9	-7.2	-6.3	-5.5	-4.6	-4	-3.5	-3.3	-2.9	-2.5	-2.5	-2.3	-2	-1.5	-1.4	-1.2	-1.2	-0.8	-0.6	-0.3	-0.3	-0.3	-0.2	0	0.3	0.2	0.2	0.4	0.5	0.5	0.6	0.8
XZ009	申扎县	2019-12-10 06:00:00	-9.1	-7.6	-6.7	-5.9	-5	-4.3	-3.7	-3.5	-3	-2.7	-2.7	-2.4	-2	-1.5	-1.4	-1.2	-1.2	-0.9	-0.6	-0.3	-0.3	-0.3	-0.2	0	0.3	0.2	0.2	0.4	0.5	0.5	0.6	0.8
XZ009	申扎县	2019-12-10 07:00:00	-10	-8.2	-7.2	-6.3	-5.3	-4.5	-4	-3.7	-3.2	-2.8	-2.8	-2.5	-2.2	-1.6	-1.5	-1.2	-1.2	-0.9	-0.6	-0.4	-0.3	-0.3	-0.2	0	0.3	0.2	0.2	0.4	0.5	0.5	0.6	0.8
XZ009	申扎县	2019-12-10 08:00:00	-10.6	-8.8	-7.7	-6.7	-5.7	-4.9	-4.2	-3.9	-3.4	-2.9	-2.9	-2.5	-2.2	-1.7	-1.5	-1.2	-1.2	-0.9	-0.6	-0.4	-0.3	-0.3	-0.2	0	0.3	0.2	0.2	0.4	0.5	0.5	0.6	0.8
XZ009	申扎县	2019-12-10 09:00:00	-11.2	-9.3	-8.2	-7.2	-6	-5.2	-4.5	-4.1	-3.6	-3.1	-3.1	-2.7	-2.4	-1.7	-1.5	-1.3	-1.2	-0.9	-0.7	-0.4	-0.4	-0.3	-0.2	0	0.3	0.1	0.2	0.4	0.5	0.4	0.6	0.8
XZ009	申扎县	2019-12-10 10:00:00	-10.4	-9.4	-8.5	-7.5	-6.4	-5.4	-4.7	-4.3	-3.8	-3.3	-3.3	-2.9	-2.5	-1.8	-1.6	-1.4	-1.3	-0.9	-0.7	-0.4	-0.4	-0.3	-0.2	0	0.3	0.2	0.2	0.4	0.5	0.4	0.6	0.8
XZ009	申扎县	2019-12-10 11:00:00	-7.4	-8	-7.9	-7.4	-6.5	-5.6	-5	-4.5	-4	-3.4	-3.4	-3	-2.6	-1.9	-1.7	-1.4	-1.4	-0.9	-0.7	-0.4	-0.4	-0.3	-0.2	-0.1	0.3	0.1	0.2	0.3	0.5	0.4	0.6	0.8
XZ009	申扎县	2019-12-10 12:00:00	-3.7	-5.7	-6.4	-6.4	-6	-5.5	-5	-4.7	-4.1	-3.6	-3.6	-3.2	-2.7	-2	-1.7	-1.4	-1.4	-1	-0.7	-0.4	-0.4	-0.3	-0.2	-0.1	0.3	0.1	0.2	0.3	0.5	0.4	0.6	0.8
XZ009	申扎县	2019-12-10 13:00:00	-0.4	-3.2	-4.4	-5	-5	-4.9	-4.7	-4.5	-4.1	-3.7	-3.7	-3.2	-2.8	-2	-1.8	-1.5	-1.4	-1	-0.7	-0.4	-0.4	-0.3	-0.2	-0.1	0.3	0.1	0.2	0.3	0.5	0.4	0.6	0.8
XZ009	申扎县	2019-12-10 14:00:00	0.4	-1.7	-2.9	-3.6	-3.9	-4.2	-4.2	-4.2	-3.9	-3.5	-3.5	-3.2	-2.8	-2.1	-1.9	-1.5	-1.4	-1	-0.7	-0.4	-0.4	-0.4	-0.2	-0.1	0.3	0.1	0.2	0.3	0.5	0.4	0.6	0.8
XZ009	申扎县	2019-12-10 15:00:00	1.1	-0.8	-1.9	-2.7	-3.1	-3.4	-3.7	-3.8	-3.7	-3.4	-3.4	-3.1	-2.8	-2.1	-1.9	-1.6	-1.5	-1	-0.7	-0.4	-0.4	-0.4	-0.3	-0.1	0.3	0.1	0.2	0.3	0.5	0.4	0.6	0.8
XZ009	申扎县	2019-12-10 16:00:00	0.8	-0.5	-1.4	-2	-2.5	-2.9	-3.2	-3.4	-3.4	-3.2	-3.2	-3	-2.7	-2.1	-1.9	-1.6	-1.5	-1	-0.8	-0.5	-0.4	-0.4	-0.3	-0.1	0.3	0.1	0.2	0.3	0.4	0.4	0.6	0.8
XZ009	申扎县	2019-12-10 17:00:00	1	-0.2	-1	-1.7	-2	-2.4	-2.7	-3	-3	-2.9	-2.9	-2.8	-2.5	-2	-1.9	-1.6	-1.5	-1	-0.8	-0.5	-0.4	-0.4	-0.3	-0.1	0.2	0.1	0.1	0.3	0.5	0.4	0.6	0.8
XZ009	申扎县	2019-12-10 18:00:00	0.6	-0.2	-0.8	-1.4	-1.7	-2.1	-2.4	-2.7	-2.7	-2.7	-2.7	-2.5	-2.4	-2	-1.9	-1.6	-1.5	-1	-0.8	-0.5	-0.5	-0.4	-0.3	-0.1	0.2	0.1	0.1	0.3	0.5	0.4	0.6	0.8
XZ009	申扎县	2019-12-10 19:00:00	-0.5	-0.5	-0.9	-1.2	-1.5	-1.9	-2.2	-2.5	-2.5	-2.5	-2.5	-2.4	-2.3	-1.9	-1.8	-1.5	-1.5	-1.1	-0.9	-0.5	-0.5	-0.4	-0.3	-0.2	0.2	0.1	0.1	0.3	0.4	0.4	0.5	0.8
XZ009	申扎县	2019-12-10 20:00:00	-1.6	-1.2	-1.2	-1.4	-1.4	-1.7	-2	-2.3	-2.3	-2.3	-2.3	-2.2	-2.1	-1.8	-1.7	-1.5	-1.5	-1	-0.8	-0.5	-0.5	-0.4	-0.4	-0.2	0.2	0.1	0.1	0.3	0.4	0.4	0.6	0.8
XZ009	申扎县	2019-12-10 21:00:00	-2.9	-2	-1.7	-1.6	-1.5	-1.7	-1.9	-2.1	-2.2	-2.1	-2.1	-2.1	-2	-1.7	-1.7	-1.4	-1.4	-1	-0.8	-0.5	-0.5	-0.4	-0.4	-0.2	0.2	0.1	0.1	0.3	0.4	0.4	0.5	0.8
XZ009	申扎县	2019-12-10 22:00:00	-3.7	-2.7	-2.3	-2	-1.8	-1.8	-1.9	-2.1	-2.1	-2	-2	-2	-1.9	-1.6	-1.6	-1.4	-1.4	-1	-0.8	-0.5	-0.5	-0.4	-0.4	-0.2	0.2	0.1	0.1	0.3	0.4	0.4	0.5	0.8
XZ009	申扎县	2019-12-10 23:00:00	-4.2	-3.3	-2.8	-2.5	-2.1	-2	-2	-2.1	-2	-2	-2	-1.9	-1.8	-1.5	-1.5	-1.4	-1.4	-1	-0.8	-0.5	-0.5	-0.4	-0.4	-0.2	0.2	0.1	0.1	0.3	0.4	0.4	0.5	0.8
XZ009	申扎县	2019-12-11 00:00:00	-4.4	-3.6	-3.2	-2.9	-2.4	-2.2	-2.1	-2.2	-2	-1.9	-1.9	-1.9	-1.7	-1.5	-1.5	-1.3	-1.3	-1	-0.7	-0.5	-0.5	-0.4	-0.4	-0.2	0.2	0.1	0.1	0.3	0.4	0.4	0.5	0.8
XZ009	申扎县	2019-12-11 01:00:00	-4.7	-3.9	-3.4	-3.1	-2.6	-2.4	-2.2	-2.2	-2.1	-2	-2	-1.9	-1.7	-1.5	-1.4	-1.2	-1.3	-0.9	-0.7	-0.4	-0.5	-0.4	-0.4	-0.2	0.1	0.1	0.1	0.3	0.4	0.3	0.5	0.8
XZ009	申扎县	2019-12-11 02:00:00	-5.7	-4.5	-3.9	-3.4	-2.9	-2.5	-2.4	-2.3	-2.2	-2	-2	-1.9	-1.7	-1.4	-1.4	-1.2	-1.2	-0.9	-0.7	-0.5	-0.5	-0.4	-0.4	-0.2	0.2	0.1	0.1	0.3	0.4	0.3	0.5	0.8
XZ009	申扎县	2019-12-11 03:00:00	-5.9	-4.9	-4.2	-3.8	-3.1	-2.7	-2.5	-2.4	-2.3	-2	-2	-1.9	-1.7	-1.4	-1.4	-1.2	-1.2	-0.9	-0.7	-0.4	-0.5	-0.4	-0.4	-0.2	0.1	0.1	0.1	0.3	0.4	0.3	0.5	0.8
XZ009	申扎县	2019-12-11 04:00:00	-5.6	-4.9	-4.4	-4	-3.4	-3	-2.7	-2.6	-2.4	-2.1	-2.1	-1.9	-1.7	-1.4	-1.4	-1.2	-1.2	-0.9	-0.7	-0.4	-0.4	-0.4	-0.4	-0.2	0.1	0.1	0.1	0.3	0.3	0.3	0.5	0.7
XZ009	申扎县	2019-12-11 05:00:00	-5.3	-4.8	-4.4	-4	-3.5	-3.1	-2.9	-2.7	-2.4	-2.2	-2.2	-2	-1.7	-1.4	-1.4	-1.2	-1.2	-0.9	-0.7	-0.4	-0.4	-0.4	-0.4	-0.2	0.1	0.1	0.1	0.3	0.4	0.3	0.5	0.7
XZ009	申扎县	2019-12-11 06:00:00	-5.4	-4.9	-4.4	-4.1	-3.5	-3.2	-2.9	-2.8	-2.5	-2.2	-2.2	-2	-1.8	-1.4	-1.4	-1.2	-1.2	-0.9	-0.7	-0.4	-0.4	-0.4	-0.4	-0.2	0.1	0.1	0.1	0.3	0.3	0.3	0.5	0.7
XZ009	申扎县	2019-12-11 07:00:00	-5.4	-4.8	-4.5	-4.2	-3.6	-3.2	-3	-2.9	-2.6	-2.3	-2.3	-2.1	-1.9	-1.4	-1.4	-1.2	-1.2	-0.9	-0.7	-0.4	-0.4	-0.4	-0.4	-0.2	0.1	0.1	0.1	0.2	0.4	0.3	0.5	0.7
XZ009	申扎县	2019-12-11 08:00:00	-5.5	-4.9	-4.5	-4.2	-3.7	-3.3	-3	-2.9	-2.7	-2.4	-2.4	-2.2	-1.9	-1.5	-1.4	-1.2	-1.2	-0.9	-0.7	-0.4	-0.4	-0.4	-0.4	-0.2	0.1	0.1	0.1	0.3	0.3	0.3	0.5	0.7
XZ009	申扎县	2019-12-11 09:00:00	-5.7	-5	-4.6	-4.2	-3.7	-3.4	-3.1	-3	-2.7	-2.4	-2.4	-2.2	-1.9	-1.5	-1.4	-1.2	-1.2	-0.9	-0.7	-0.4	-0.4	-0.4	-0.4	-0.2	0.1	0	0.1	0.3	0.3	0.3	0.5	0.7
XZ009	申扎县	2019-12-11 10:00:00	-5.9	-5.2	-4.7	-4.4	-3.8	-3.4	-3.2	-3	-2.7	-2.4	-2.4	-2.2	-2	-1.5	-1.4	-1.2	-1.2	-0.9	-0.7	-0.4	-0.4	-0.4	-0.4	-0.2	0.1	0.1	0.1	0.2	0.3	0.3	0.5	0.7
XZ009	申扎县	2019-12-11 11:00:00	-5.4	-5	-4.7	-4.4	-3.9	-3.5	-3.2	-3	-2.8	-2.5	-2.5	-2.2	-2	-1.5	-1.4	-1.2	-1.2	-0.9	-0.7	-0.4	-0.4	-0.4	-0.4	-0.2	0.1	0	0.1	0.3	0.3	0.3	0.5	0.7
XZ009	申扎县	2019-12-11 12:00:00	-4.9	-4.7	-4.5	-4.4	-3.9	-3.5	-3.2	-3.1	-2.9	-2.5	-2.5	-2.3	-2	-1.5	-1.5	-1.2	-1.2	-0.9	-0.7	-0.4	-0.4	-0.4	-0.4	-0.2	0.1	0	0.1	0.2	0.3	0.3	0.5	0.7
XZ009	申扎县	2019-12-11 13:00:00	-3.6	-4.2	-4.2	-4.1	-3.7	-3.4	-3.2	-3.1	-2.9	-2.5	-2.5	-2.4	-2	-1.5	-1.5	-1.3	-1.3	-0.9	-0.7	-0.4	-0.4	-0.4	-0.4	-0.2	0.1	0.1	0.1	0.2	0.3	0.3	0.5	0.7
XZ009	申扎县	2019-12-11 14:00:00	-2.7	-3.3	-3.5	-3.7	-3.5	-3.3	-3.2	-3.1	-2.9	-2.5	-2.5	-2.4	-2	-1.6	-1.5	-1.3	-1.2	-0.9	-0.7	-0.4	-0.4	-0.4	-0.4	-0.2	0.1	0	0.1	0.2	0.3	0.3	0.5	0.7
XZ009	申扎县	2019-12-11 15:00:00	-1.9	-2.7	-3	-3.2	-3.1	-3	-3	-3	-2.8	-2.5	-2.5	-2.4	-2.1	-1.6	-1.5	-1.3	-1.3	-0.9	-0.7	-0.4	-0.4	-0.4	-0.4	-0.2	0.1	0	0.1	0.2	0.3	0.3	0.5	0.7
XZ009	申扎县	2019-12-11 16:00:00	-2.5	-2.7	-2.8	-2.9	-2.8	-2.8	-2.9	-2.9	-2.7	-2.5	-2.5	-2.3	-2.1	-1.6	-1.5	-1.3	-1.3	-0.9	-0.7	-0.5	-0.4	-0.4	-0.4	-0.2	0.1	0	0.1	0.2	0.3	0.3	0.5	0.7
XZ009	申扎县	2019-12-11 17:00:00	-1.7	-2.3	-2.5	-2.7	-2.7	-2.7	-2.7	-2.7	-2.6	-2.4	-2.4	-2.2	-2	-1.6	-1.5	-1.3	-1.3	-0.9	-0.7	-0.5	-0.5	-0.4	-0.4	-0.2	0.1	0	0.1	0.2	0.3	0.3	0.5	0.6
XZ009	申扎县	2019-12-11 18:00:00	-1.7	-2.1	-2.4	-2.5	-2.5	-2.5	-2.5	-2.7	-2.5	-2.4	-2.4	-2.2	-2	-1.6	-1.5	-1.3	-1.3	-0.9	-0.7	-0.5	-0.5	-0.4	-0.4	-0.2	0.1	0	0.1	0.2	0.3	0.3	0.5	0.7
XZ009	申扎县	2019-12-11 19:00:00	-2.9	-2.4	-2.4	-2.4	-2.3	-2.4	-2.4	-2.5	-2.4	-2.2	-2.2	-2.1	-1.9	-1.6	-1.5	-1.3	-1.3	-0.9	-0.7	-0.5	-0.5	-0.4	-0.4	-0.2	0.1	0	0.1	0.2	0.3	0.3	0.5	0.6
XZ009	申扎县	2019-12-11 20:00:00	-4.7	-3.4	-3	-2.7	-2.4	-2.3	-2.4	-2.4	-2.3	-2.2	-2.2	-2.1	-1.9	-1.5	-1.5	-1.3	-1.3	-0.9	-0.7	-0.5	-0.5	-0.5	-0.4	-0.2	0.1	0	0.1	0.2	0.3	0.3	0.5	0.6
XZ009	申扎县	2019-12-11 21:00:00	-6	-4.5	-3.8	-3.3	-2.8	-2.5	-2.4	-2.4	-2.3	-2.1	-2.1	-2	-1.9	-1.5	-1.5	-1.3	-1.3	-0.9	-0.7	-0.5	-0.5	-0.4	-0.4	-0.2	0.1	0	0.1	0.2	0.3	0.3	0.5	0.6
XZ009	申扎县	2019-12-11 22:00:00	-6.4	-5.1	-4.4	-3.9	-3.2	-2.8	-2.5	-2.5	-2.4	-2.2	-2.2	-2	-1.8	-1.5	-1.4	-1.2	-1.3	-0.9	-0.7	-0.5	-0.5	-0.4	-0.4	-0.3	0.1	0	0.1	0.2	0.3	0.3	0.5	0.6
XZ009	申扎县	2019-12-11 23:00:00	-7	-5.6	-4.9	-4.3	-3.5	-3	-2.8	-2.7	-2.4	-2.2	-2.2	-2	-1.9	-1.5	-1.4	-1.2	-1.2	-0.9	-0.7	-0.5	-0.5	-0.5	-0.4	-0.3	0.1	0	0	0.2	0.3	0.3	0.5	0.6
XZ009	申扎县	2019-12-12 00:00:00	-7.6	-6.2	-5.4	-4.7	-3.9	-3.3	-3	-2.9	-2.5	-2.2	-2.2	-2.1	-1.9	-1.5	-1.4	-1.2	-1.3	-0.9	-0.7	-0.5	-0.5	-0.4	-0.4	-0.3	0.1	0	0	0.2	0.3	0.3	0.5	0.6
XZ009	申扎县	2019-12-12 01:00:00	-8.3	-6.7	-5.8	-5.1	-4.2	-3.6	-3.2	-3	-2.7	-2.4	-2.4	-2.2	-1.9	-1.5	-1.4	-1.2	-1.2	-0.9	-0.7	-0.4	-0.5	-0.4	-0.4	-0.2	0.1	0	0	0.2	0.3	0.3	0.5	0.6
XZ009	申扎县	2019-12-12 02:00:00	-8.9	-7.2	-6.3	-5.4	-4.5	-3.9	-3.4	-3.2	-2.8	-2.5	-2.5	-2.2	-2	-1.5	-1.4	-1.2	-1.2	-0.9	-0.7	-0.4	-0.5	-0.4	-0.4	-0.3	0.1	0	0	0.2	0.3	0.3	0.4	0.6
XZ009	申扎县	2019-12-12 03:00:00	-9.1	-7.6	-6.7	-5.9	-4.9	-4.2	-3.7	-3.3	-3	-2.6	-2.6	-2.3	-2	-1.5	-1.4	-1.3	-1.2	-0.9	-0.7	-0.5	-0.5	-0.4	-0.4	-0.3	0.1	0	0	0.1	0.3	0.3	0.4	0.6
XZ009	申扎县	2019-12-12 04:00:00	-9.3	-7.9	-7	-6.2	-5.1	-4.4	-3.9	-3.5	-3.2	-2.7	-2.7	-2.4	-2.1	-1.6	-1.5	-1.3	-1.2	-0.9	-0.7	-0.4	-0.5	-0.5	-0.4	-0.2	0.1	0	0	0.1	0.3	0.3	0.4	0.6
XZ009	申扎县	2019-12-12 05:00:00	-9.3	-8	-7.2	-6.4	-5.4	-4.6	-4	-3.7	-3.3	-2.9	-2.9	-2.5	-2.2	-1.7	-1.5	-1.3	-1.3	-0.9	-0.7	-0.5	-0.5	-0.4	-0.4	-0.3	0.1	0	0	0.1	0.3	0.3	0.4	0.6
XZ009	申扎县	2019-12-12 06:00:00	-9.7	-8.3	-7.4	-6.5	-5.6	-4.8	-4.3	-3.9	-3.5	-3	-3	-2.7	-2.3	-1.7	-1.6	-1.4	-1.4	-1	-0.7	-0.5	-0.5	-0.4	-0.4	-0.3	0.1	0	0	0.1	0.3	0.3	0.4	0.6
XZ009	申扎县	2019-12-12 07:00:00	-10.2	-8.6	-7.7	-6.9	-5.8	-5	-4.4	-4.1	-3.6	-3.1	-3.1	-2.8	-2.4	-1.8	-1.6	-1.4	-1.4	-1	-0.8	-0.5	-0.5	-0.4	-0.4	-0.3	0.1	0	0	0.1	0.3	0.3	0.5	0.6
XZ009	申扎县	2019-12-12 08:00:00	-10.5	-9	-8	-7.1	-6	-5.2	-4.7	-4.2	-3.8	-3.3	-3.3	-2.9	-2.5	-1.9	-1.7	-1.4	-1.4	-1	-0.8	-0.5	-0.5	-0.5	-0.4	-0.3	0.1	0	0	0.1	0.3	0.3	0.4	0.6
XZ009	申扎县	2019-12-12 09:00:00	-10.5	-9.1	-8.2	-7.4	-6.3	-5.5	-4.8	-4.4	-3.9	-3.4	-3.4	-3	-2.6	-1.9	-1.8	-1.5	-1.4	-1	-0.8	-0.5	-0.5	-0.5	-0.4	-0.3	0	0	0	0.1	0.3	0.3	0.4	0.6
XZ009	申扎县	2019-12-12 10:00:00	-9.7	-8.9	-8.2	-7.5	-6.4	-5.6	-5	-4.6	-4.1	-3.5	-3.5	-3.2	-2.7	-2	-1.8	-1.5	-1.5	-1	-0.9	-0.5	-0.5	-0.5	-0.4	-0.3	0.1	0	0	0.1	0.3	0.2	0.4	0.6
XZ009	申扎县	2019-12-12 11:00:00	-8.1	-8	-7.8	-7.2	-6.4	-5.7	-5.1	-4.7	-4.2	-3.7	-3.7	-3.3	-2.9	-2.1	-1.9	-1.6	-1.5	-1.1	-0.9	-0.6	-0.5	-0.5	-0.4	-0.3	0.1	0	0	0.1	0.3	0.2	0.4	0.6
XZ009	申扎县	2019-12-12 12:00:00	-5.9	-6.8	-7	-6.7	-6.1	-5.6	-5.1	-4.8	-4.3	-3.8	-3.8	-3.4	-2.9	-2.2	-1.9	-1.7	-1.5	-1.1	-0.9	-0.5	-0.5	-0.5	-0.5	-0.3	0	0	0	0.1	0.3	0.2	0.4	0.6
XZ009	申扎县	2019-12-12 13:00:00	-3	-4.9	-5.6	-5.9	-5.6	-5.3	-5	-4.7	-4.3	-3.9	-3.9	-3.4	-3	-2.2	-2	-1.7	-1.5	-1.2	-0.9	-0.6	-0.5	-0.5	-0.5	-0.3	0	0	0	0.1	0.3	0.2	0.4	0.6
XZ009	申扎县	2019-12-12 14:00:00	-1.3	-3.2	-4.1	-4.7	-4.7	-4.7	-4.7	-4.5	-4.2	-3.8	-3.8	-3.5	-3	-2.3	-2	-1.7	-1.6	-1.2	-0.9	-0.6	-0.6	-0.5	-0.5	-0.4	0	0	0	0.1	0.3	0.2	0.4	0.6
XZ009	申扎县	2019-12-12 15:00:00	0.2	-1.7	-2.9	-3.6	-3.9	-4.1	-4.2	-4.2	-4	-3.7	-3.7	-3.4	-3	-2.3	-2	-1.7	-1.6	-1.2	-0.9	-0.6	-0.6	-0.5	-0.5	-0.4	0	0	0	0.1	0.3	0.2	0.4	0.6
XZ009	申扎县	2019-12-12 16:00:00	0	-1.3	-2.1	-2.8	-3.2	-3.5	-3.7	-3.9	-3.7	-3.5	-3.5	-3.2	-2.9	-2.3	-2	-1.7	-1.7	-1.2	-1	-0.6	-0.6	-0.5	-0.5	-0.4	0	0	0	0.1	0.2	0.2	0.4	0.6
XZ009	申扎县	2019-12-12 17:00:00	-0.5	-1.3	-1.8	-2.4	-2.7	-3	-3.3	-3.5	-3.4	-3.2	-3.2	-3.1	-2.9	-2.2	-2	-1.8	-1.7	-1.2	-1	-0.7	-0.6	-0.5	-0.5	-0.4	0	0	0	0.1	0.3	0.2	0.4	0.6
XZ009	申扎县	2019-12-12 18:00:00	-1	-1.5	-1.8	-2.2	-2.4	-2.7	-2.9	-3.2	-3.2	-3	-3	-2.9	-2.7	-2.2	-2	-1.8	-1.7	-1.3	-1	-0.7	-0.7	-0.6	-0.5	-0.4	0	0	0	0.1	0.3	0.2	0.4	0.6
XZ009	申扎县	2019-12-12 19:00:00	-1.7	-1.8	-2	-2.2	-2.3	-2.5	-2.7	-2.9	-2.9	-2.9	-2.9	-2.7	-2.5	-2.1	-2	-1.7	-1.7	-1.3	-1	-0.7	-0.7	-0.6	-0.5	-0.4	0	0	0	0.1	0.3	0.2	0.4	0.6
XZ009	申扎县	2019-12-12 20:00:00	-2.3	-2.2	-2.2	-2.3	-2.3	-2.4	-2.5	-2.8	-2.8	-2.7	-2.7	-2.6	-2.4	-2	-1.9	-1.7	-1.7	-1.3	-1	-0.7	-0.7	-0.6	-0.5	-0.4	0	0	0	0.1	0.2	0.2	0.4	0.6
XZ009	申扎县	2019-12-12 21:00:00	-3	-2.6	-2.5	-2.5	-2.4	-2.4	-2.5	-2.7	-2.7	-2.5	-2.5	-2.5	-2.4	-2	-1.9	-1.7	-1.7	-1.2	-1	-0.7	-0.7	-0.6	-0.5	-0.4	0	0	0	0.1	0.2	0.2	0.4	0.6
XZ009	申扎县	2019-12-12 22:00:00	-3.8	-3.2	-2.9	-2.7	-2.5	-2.4	-2.5	-2.6	-2.5	-2.4	-2.4	-2.4	-2.2	-1.9	-1.9	-1.6	-1.6	-1.2	-1	-0.7	-0.7	-0.7	-0.5	-0.4	0	0	0	0.1	0.2	0.2	0.3	0.6
XZ009	申扎县	2019-12-12 23:00:00	-4.6	-3.7	-3.4	-3	-2.7	-2.5	-2.5	-2.6	-2.5	-2.4	-2.4	-2.3	-2.2	-1.9	-1.8	-1.6	-1.6	-1.2	-1	-0.7	-0.7	-0.6	-0.6	-0.4	0	0	0	0.1	0.2	0.1	0.3	0.6
XZ009	申扎县	2019-12-13 00:00:00	-5.4	-4.4	-3.8	-3.4	-3	-2.7	-2.6	-2.6	-2.5	-2.4	-2.4	-2.2	-2.1	-1.8	-1.7	-1.5	-1.5	-1.2	-1	-0.7	-0.7	-0.7	-0.6	-0.4	0	0	0	0.1	0.2	0.2	0.3	0.6
XZ009	申扎县	2019-12-13 01:00:00	-6.2	-5	-4.4	-3.9	-3.3	-3	-2.8	-2.7	-2.5	-2.4	-2.4	-2.2	-2.1	-1.8	-1.7	-1.5	-1.5	-1.2	-1	-0.7	-0.7	-0.7	-0.6	-0.4	0	0	0	0.1	0.2	0.1	0.3	0.6
XZ009	申扎县	2019-12-13 02:00:00	-6.3	-5.4	-4.8	-4.2	-3.6	-3.2	-2.9	-2.9	-2.6	-2.4	-2.4	-2.3	-2	-1.7	-1.7	-1.5	-1.5	-1.2	-1	-0.7	-0.7	-0.7	-0.6	-0.4	0	0	0	0.1	0.2	0.1	0.3	0.6
XZ009	申扎县	2019-12-13 03:00:00	-5.7	-5.2	-4.9	-4.4	-3.8	-3.4	-3.1	-3	-2.7	-2.5	-2.5	-2.3	-2.1	-1.7	-1.7	-1.5	-1.5	-1.1	-0.9	-0.7	-0.7	-0.6	-0.5	-0.4	0	0	0	0.1	0.2	0.1	0.3	0.6
XZ009	申扎县	2019-12-13 04:00:00	-5.7	-5.3	-4.9	-4.5	-3.9	-3.5	-3.2	-3.1	-2.9	-2.5	-2.5	-2.4	-2.1	-1.7	-1.7	-1.5	-1.5	-1.1	-0.9	-0.7	-0.7	-0.6	-0.6	-0.4	0	0	0	0.1	0.2	0.1	0.3	0.5
XZ009	申扎县	2019-12-13 05:00:00	-6	-5.4	-5	-4.6	-4	-3.6	-3.4	-3.2	-2.9	-2.6	-2.6	-2.4	-2.2	-1.7	-1.7	-1.5	-1.5	-1.1	-0.9	-0.7	-0.7	-0.7	-0.6	-0.4	0	0	0	0	0.2	0.1	0.3	0.5
XZ009	申扎县	2019-12-13 06:00:00	-6.4	-5.6	-5.2	-4.8	-4.2	-3.7	-3.4	-3.3	-3	-2.7	-2.7	-2.5	-2.2	-1.8	-1.7	-1.5	-1.5	-1.1	-0.9	-0.7	-0.7	-0.6	-0.5	-0.4	0	0	0	0.1	0.2	0.1	0.3	0.5
XZ009	申扎县	2019-12-13 07:00:00	-6.7	-5.9	-5.4	-4.9	-4.3	-3.9	-3.5	-3.4	-3.1	-2.8	-2.8	-2.5	-2.2	-1.8	-1.7	-1.5	-1.5	-1.1	-0.9	-0.7	-0.7	-0.6	-0.6	-0.4	0	0	0	0.1	0.1	0.1	0.3	0.5
XZ009	申扎县	2019-12-13 08:00:00	-7.4	-6.3	-5.7	-5.2	-4.5	-4	-3.7	-3.4	-3.2	-2.9	-2.9	-2.5	-2.3	-1.8	-1.7	-1.5	-1.5	-1.1	-0.9	-0.7	-0.7	-0.6	-0.6	-0.4	0	0	0	0	0.2	0.1	0.3	0.5
XZ009	申扎县	2019-12-13 09:00:00	-7.2	-6.4	-5.9	-5.4	-4.7	-4.1	-3.8	-3.5	-3.2	-2.9	-2.9	-2.6	-2.4	-1.9	-1.7	-1.5	-1.5	-1.2	-0.9	-0.7	-0.7	-0.7	-0.6	-0.4	0	0	0	0	0.1	0.1	0.3	0.5
XZ009	申扎县	2019-12-13 10:00:00	-7.4	-6.6	-6.1	-5.5	-4.8	-4.3	-3.9	-3.7	-3.4	-3	-3	-2.7	-2.4	-1.9	-1.8	-1.5	-1.5	-1.2	-0.9	-0.7	-0.7	-0.6	-0.6	-0.5	0	0	0	0	0.1	0.1	0.3	0.5
XZ009	申扎县	2019-12-13 11:00:00	-6.3	-6.2	-6	-5.6	-4.9	-4.4	-4	-3.8	-3.4	-3	-3	-2.8	-2.5	-1.9	-1.8	-1.5	-1.5	-1.2	-1	-0.7	-0.7	-0.7	-0.6	-0.4	0	0	0	0.1	0.1	0.1	0.3	0.5
XZ009	申扎县	2019-12-13 12:00:00	-4.3	-5.2	-5.3	-5.2	-4.8	-4.4	-4	-3.9	-3.5	-3.2	-3.2	-2.9	-2.5	-2	-1.9	-1.6	-1.5	-1.2	-1	-0.7	-0.7	-0.7	-0.6	-0.5	0	0	0	0	0.1	0.1	0.3	0.5
XZ009	申扎县	2019-12-13 13:00:00	-1.9	-3.6	-4.2	-4.5	-4.3	-4.1	-3.9	-3.9	-3.5	-3.2	-3.2	-2.9	-2.6	-2	-1.9	-1.6	-1.6	-1.2	-1	-0.7	-0.7	-0.7	-0.6	-0.5	0	0	0	0	0.1	0.1	0.3	0.5
XZ009	申扎县	2019-12-13 14:00:00	0.1	-1.9	-2.9	-3.5	-3.6	-3.7	-3.7	-3.7	-3.5	-3.2	-3.2	-2.9	-2.6	-2	-1.9	-1.7	-1.6	-1.2	-1	-0.7	-0.7	-0.7	-0.6	-0.5	0	0	0	0	0.1	0.1	0.3	0.5
XZ009	申扎县	2019-12-13 15:00:00	0.9	-1	-1.9	-2.6	-2.9	-3.2	-3.3	-3.4	-3.3	-3	-3	-2.9	-2.6	-2	-1.9	-1.7	-1.6	-1.2	-1	-0.7	-0.7	-0.7	-0.6	-0.5	0	0	0	0	0.1	0.1	0.3	0.5
XZ009	申扎县	2019-12-13 16:00:00	1.2	-0.4	-1.3	-1.9	-2.3	-2.7	-2.9	-3.1	-3	-2.9	-2.9	-2.7	-2.5	-2	-1.9	-1.7	-1.7	-1.2	-1	-0.7	-0.7	-0.7	-0.6	-0.5	0	0	0	0	0.1	0.1	0.3	0.5
XZ009	申扎县	2019-12-13 17:00:00	0.1	-0.4	-1	-1.5	-1.9	-2.2	-2.5	-2.8	-2.8	-2.7	-2.7	-2.6	-2.4	-2	-1.9	-1.7	-1.7	-1.3	-1	-0.7	-0.7	-0.7	-0.6	-0.5	0	0	0	0	0.1	0.1	0.3	0.5
XZ009	申扎县	2019-12-13 18:00:00	-0.4	-0.7	-1	-1.4	-1.6	-2	-2.3	-2.5	-2.6	-2.5	-2.5	-2.5	-2.3	-1.9	-1.9	-1.7	-1.7	-1.2	-1	-0.7	-0.7	-0.7	-0.7	-0.5	0	0	0	0	0.1	0.1	0.3	0.5
XZ009	申扎县	2019-12-13 19:00:00	-1.4	-1.2	-1.2	-1.4	-1.5	-1.8	-2	-2.3	-2.4	-2.3	-2.3	-2.3	-2.2	-1.9	-1.8	-1.6	-1.6	-1.3	-1	-0.7	-0.7	-0.7	-0.7	-0.5	0	0	0	0	0.1	0.1	0.3	0.5
XZ009	申扎县	2019-12-13 20:00:00	-2.3	-1.8	-1.6	-1.7	-1.6	-1.7	-1.9	-2.2	-2.2	-2.2	-2.2	-2.2	-2	-1.9	-1.8	-1.6	-1.6	-1.2	-1	-0.7	-0.7	-0.7	-0.7	-0.5	0	0	0	0	0.1	0.1	0.3	0.5
XZ009	申扎县	2019-12-13 21:00:00	-2.9	-2.3	-2	-1.9	-1.8	-1.8	-1.9	-2.1	-2.2	-2.1	-2.1	-2	-2	-1.7	-1.7	-1.5	-1.5	-1.2	-1	-0.7	-0.7	-0.7	-0.7	-0.5	0	0	0	0	0.1	0.1	0.3	0.5
XZ009	申扎县	2019-12-13 22:00:00	-3.4	-2.7	-2.4	-2.2	-2	-1.9	-2	-2.1	-2.1	-2	-2	-2	-1.9	-1.7	-1.7	-1.5	-1.5	-1.2	-1	-0.7	-0.7	-0.7	-0.7	-0.5	0	0	0	0	0.1	0.1	0.3	0.5
XZ009	申扎县	2019-12-14 02:00:00	-4.7	-4	-3.6	-3.3	-2.8	-2.5	-2.4	-2.4	-2.2	-2	-2	-1.9	-1.8	-1.5	-1.5	-1.4	-1.4	-1.1	-0.9	-0.7	-0.7	-0.7	-0.6	-0.5	0	0	0	0	0.1	0.1	0.3	0.5
XZ009	申扎县	2019-12-14 03:00:00	-5.5	-4.4	-3.9	-3.5	-3	-2.7	-2.5	-2.5	-2.3	-2	-2	-1.9	-1.8	-1.5	-1.5	-1.4	-1.4	-1.1	-0.9	-0.7	-0.7	-0.7	-0.6	-0.5	0	0	0	0	0.1	0.1	0.3	0.5
XZ009	申扎县	2019-12-14 04:00:00	-6	-4.9	-4.4	-3.8	-3.2	-2.9	-2.6	-2.5	-2.4	-2.1	-2.1	-2	-1.8	-1.5	-1.5	-1.3	-1.4	-1	-0.9	-0.7	-0.7	-0.7	-0.6	-0.5	0	0	0	0	0.1	0.1	0.3	0.5
XZ009	申扎县	2019-12-14 05:00:00	-6.5	-5.4	-4.7	-4.2	-3.5	-3	-2.8	-2.7	-2.4	-2.2	-2.2	-2	-1.9	-1.5	-1.5	-1.3	-1.4	-1	-0.9	-0.6	-0.7	-0.7	-0.6	-0.5	0	0	0	0	0.1	0.1	0.3	0.5
XZ009	申扎县	2019-12-14 06:00:00	-6.5	-5.5	-5	-4.5	-3.8	-3.3	-2.9	-2.8	-2.5	-2.2	-2.2	-2	-1.9	-1.5	-1.5	-1.3	-1.4	-1	-0.9	-0.6	-0.7	-0.6	-0.6	-0.5	0	0	0	0	0.1	0.1	0.3	0.5
XZ009	申扎县	2019-12-14 07:00:00	-6.4	-5.7	-5.2	-4.7	-3.9	-3.4	-3.1	-2.9	-2.7	-2.4	-2.4	-2.1	-1.9	-1.5	-1.5	-1.3	-1.4	-1	-0.9	-0.6	-0.6	-0.7	-0.6	-0.5	0	0	0	0	0.1	0.1	0.3	0.5
XZ009	申扎县	2019-12-14 08:00:00	-6.1	-5.5	-5.2	-4.7	-4	-3.6	-3.2	-3	-2.7	-2.5	-2.5	-2.2	-2	-1.5	-1.5	-1.3	-1.4	-1	-0.9	-0.6	-0.6	-0.6	-0.6	-0.5	0	0	0	0	0.1	0.1	0.2	0.5
XZ009	申扎县	2019-12-14 09:00:00	-6.2	-5.5	-5.2	-4.7	-4.1	-3.7	-3.4	-3.2	-2.9	-2.5	-2.5	-2.3	-2	-1.6	-1.5	-1.4	-1.4	-1	-0.9	-0.6	-0.6	-0.6	-0.6	-0.5	0	0	0	0	0.1	0.1	0.3	0.5
XZ009	申扎县	2019-12-14 10:00:00	-5.9	-5.5	-5.2	-4.8	-4.2	-3.7	-3.4	-3.2	-3	-2.6	-2.6	-2.4	-2.1	-1.7	-1.5	-1.4	-1.4	-1	-0.9	-0.6	-0.7	-0.6	-0.6	-0.5	0	0	0	0	0.1	0	0.2	0.5
XZ009	申扎县	2019-12-14 11:00:00	-4.3	-4.7	-4.8	-4.6	-4.1	-3.7	-3.5	-3.4	-3	-2.7	-2.7	-2.4	-2.2	-1.7	-1.6	-1.4	-1.4	-1	-0.9	-0.6	-0.7	-0.7	-0.6	-0.5	0	0	0	0	0.1	0.1	0.3	0.5
XZ009	申扎县	2019-12-14 12:00:00	-3.2	-3.9	-4.1	-4.2	-3.9	-3.7	-3.4	-3.3	-3	-2.7	-2.7	-2.5	-2.2	-1.7	-1.6	-1.4	-1.4	-1.1	-0.9	-0.6	-0.7	-0.6	-0.6	-0.5	0	0	0	0	0.1	0.1	0.2	0.5
XZ009	申扎县	2019-12-14 13:00:00	-1.2	-2.6	-3.2	-3.5	-3.4	-3.4	-3.3	-3.2	-3	-2.7	-2.7	-2.5	-2.2	-1.7	-1.7	-1.4	-1.4	-1.1	-0.9	-0.7	-0.7	-0.6	-0.6	-0.5	0	0	0	0	0.1	0	0.3	0.5
XZ009	申扎县	2019-12-14 14:00:00	-0.7	-1.9	-2.4	-2.8	-2.9	-3	-3	-3.1	-2.9	-2.7	-2.7	-2.5	-2.2	-1.8	-1.7	-1.5	-1.4	-1.1	-0.9	-0.7	-0.7	-0.7	-0.6	-0.5	0	0	0	0	0.1	0.1	0.2	0.5
XZ009	申扎县	2019-12-14 15:00:00	-0.5	-1.4	-1.9	-2.3	-2.5	-2.6	-2.7	-2.9	-2.8	-2.6	-2.6	-2.4	-2.2	-1.8	-1.7	-1.5	-1.5	-1.1	-0.9	-0.7	-0.7	-0.7	-0.6	-0.5	0	0	0	0	0.1	0	0.2	0.5
XZ009	申扎县	2019-12-14 16:00:00	-1	-1.4	-1.7	-2	-2.1	-2.3	-2.5	-2.6	-2.6	-2.5	-2.5	-2.3	-2.2	-1.8	-1.7	-1.5	-1.5	-1.1	-0.9	-0.6	-0.7	-0.7	-0.6	-0.5	0	-0.1	0	0	0.1	0.1	0.2	0.5
XZ009	申扎县	2019-12-14 17:00:00	-2	-1.8	-1.8	-2	-2	-2.1	-2.3	-2.5	-2.5	-2.3	-2.3	-2.2	-2.1	-1.7	-1.7	-1.5	-1.5	-1.1	-0.9	-0.7	-0.7	-0.7	-0.6	-0.5	0	0	0	0	0.1	0.1	0.2	0.5
XZ009	申扎县	2019-12-14 18:00:00	-2	-2	-2	-2	-1.9	-2	-2.2	-2.3	-2.3	-2.2	-2.2	-2.1	-2	-1.7	-1.7	-1.5	-1.5	-1.1	-0.9	-0.7	-0.7	-0.7	-0.7	-0.5	0	0	0	0	0.1	0	0.2	0.5
XZ009	申扎县	2019-12-14 19:00:00	-2.7	-2.3	-2.2	-2.1	-2	-2	-2.1	-2.2	-2.2	-2.1	-2.1	-2	-1.9	-1.7	-1.6	-1.5	-1.5	-1.1	-0.9	-0.7	-0.7	-0.7	-0.6	-0.5	0	-0.1	0	0	0.1	0	0.2	0.5
XZ009	申扎县	2019-12-14 20:00:00	-3.2	-2.7	-2.5	-2.4	-2.1	-2	-2	-2.2	-2.2	-2	-2	-2	-1.9	-1.6	-1.6	-1.4	-1.4	-1.1	-0.9	-0.7	-0.7	-0.7	-0.7	-0.5	0	-0.1	0	0	0.1	0	0.2	0.4
XZ009	申扎县	2019-12-14 21:00:00	-3.7	-3	-2.7	-2.5	-2.2	-2.1	-2.1	-2.2	-2.1	-2	-2	-1.9	-1.8	-1.5	-1.5	-1.4	-1.4	-1.1	-0.9	-0.7	-0.7	-0.7	-0.6	-0.5	0	-0.1	0	0	0.1	0	0.2	0.5
XZ009	申扎县	2019-12-14 22:00:00	-4.2	-3.4	-3	-2.8	-2.4	-2.2	-2.2	-2.2	-2.1	-2	-2	-1.9	-1.8	-1.5	-1.5	-1.4	-1.4	-1.1	-0.9	-0.7	-0.7	-0.7	-0.6	-0.5	0	-0.1	0	0	0.1	0	0.2	0.5
XZ009	申扎县	2019-12-14 23:00:00	-4.5	-3.7	-3.4	-3	-2.6	-2.4	-2.2	-2.2	-2.2	-2	-2	-1.9	-1.7	-1.5	-1.5	-1.3	-1.4	-1.1	-0.9	-0.7	-0.7	-0.7	-0.7	-0.5	0	-0.1	0	0	0.1	0	0.2	0.5
XZ009	申扎县	2019-12-15 00:00:00	-4.7	-4	-3.6	-3.3	-2.7	-2.5	-2.4	-2.4	-2.2	-2	-2	-1.9	-1.7	-1.5	-1.5	-1.3	-1.4	-1	-0.9	-0.6	-0.7	-0.7	-0.7	-0.5	0	-0.1	0	0	0.1	0	0.2	0.4
XZ009	申扎县	2019-12-15 01:00:00	-5.1	-4.3	-3.9	-3.5	-2.9	-2.6	-2.4	-2.4	-2.2	-2	-2	-1.9	-1.8	-1.5	-1.4	-1.3	-1.4	-1	-0.9	-0.7	-0.7	-0.7	-0.6	-0.5	0	-0.1	0	0	0.1	0	0.2	0.5
XZ009	申扎县	2019-12-15 02:00:00	-5.6	-4.7	-4.1	-3.7	-3.1	-2.8	-2.5	-2.5	-2.3	-2	-2	-1.9	-1.8	-1.5	-1.5	-1.3	-1.4	-1	-0.9	-0.6	-0.7	-0.7	-0.6	-0.5	0	0	0	0	0.1	0	0.2	0.5
XZ009	申扎县	2019-12-15 03:00:00	-6.2	-5	-4.5	-4	-3.4	-2.9	-2.7	-2.6	-2.4	-2.2	-2.2	-2	-1.8	-1.5	-1.4	-1.3	-1.3	-1	-0.8	-0.6	-0.7	-0.7	-0.6	-0.5	0	-0.1	0	0	0.1	0	0.2	0.4
XZ009	申扎县	2019-12-15 04:00:00	-6.9	-5.6	-4.9	-4.3	-3.6	-3.1	-2.9	-2.7	-2.5	-2.2	-2.2	-2	-1.8	-1.5	-1.4	-1.2	-1.3	-1	-0.9	-0.6	-0.6	-0.6	-0.6	-0.5	0	-0.1	0	0	0.1	0	0.2	0.4
XZ009	申扎县	2019-12-15 05:00:00	-7.3	-6	-5.3	-4.7	-3.9	-3.4	-3	-2.9	-2.5	-2.3	-2.3	-2	-1.9	-1.5	-1.5	-1.3	-1.4	-1	-0.8	-0.6	-0.6	-0.6	-0.6	-0.5	0	-0.1	0	0	0.1	0	0.2	0.4
XZ009	申扎县	2019-12-15 06:00:00	-7.6	-6.4	-5.7	-5	-4.2	-3.6	-3.2	-3	-2.7	-2.4	-2.4	-2.2	-1.9	-1.5	-1.5	-1.3	-1.3	-1	-0.8	-0.6	-0.7	-0.7	-0.6	-0.5	0	-0.1	0	0	0.1	0	0.2	0.4
XZ009	申扎县	2019-12-15 07:00:00	-7.9	-6.7	-6	-5.3	-4.4	-3.8	-3.4	-3.2	-2.9	-2.5	-2.5	-2.2	-2	-1.5	-1.5	-1.3	-1.4	-1	-0.9	-0.6	-0.6	-0.6	-0.6	-0.5	0	-0.1	0	0	0.1	0	0.2	0.4
XZ009	申扎县	2019-12-15 08:00:00	-8.1	-7	-6.2	-5.5	-4.7	-4	-3.5	-3.4	-3	-2.6	-2.6	-2.4	-2	-1.6	-1.5	-1.4	-1.4	-1	-0.9	-0.6	-0.6	-0.6	-0.6	-0.5	0	-0.1	0	0	0.1	0	0.2	0.4
XZ009	申扎县	2019-12-15 09:00:00	-8.3	-7.2	-6.5	-5.8	-4.9	-4.2	-3.8	-3.5	-3.1	-2.7	-2.7	-2.5	-2.2	-1.7	-1.6	-1.4	-1.4	-1	-0.9	-0.6	-0.7	-0.6	-0.6	-0.5	0	-0.1	0	0	0.1	0	0.2	0.4
XZ009	申扎县	2019-12-15 10:00:00	-7.8	-7.2	-6.6	-5.9	-5	-4.4	-3.9	-3.6	-3.3	-2.9	-2.9	-2.5	-2.3	-1.7	-1.6	-1.4	-1.4	-1	-0.9	-0.6	-0.6	-0.6	-0.6	-0.5	0	0	0	0	0.1	0	0.2	0.4
XZ009	申扎县	2019-12-15 11:00:00	-6.4	-6.5	-6.3	-5.9	-5.1	-4.5	-4	-3.8	-3.4	-3	-3	-2.7	-2.4	-1.8	-1.7	-1.4	-1.4	-1	-0.9	-0.6	-0.7	-0.7	-0.6	-0.5	0	-0.1	0	0	0.1	0	0.2	0.4
XZ009	申扎县	2019-12-15 12:00:00	-4.5	-5.3	-5.5	-5.4	-4.9	-4.5	-4.1	-3.9	-3.5	-3.1	-3.1	-2.8	-2.4	-1.9	-1.7	-1.5	-1.5	-1.1	-0.9	-0.7	-0.7	-0.7	-0.6	-0.5	0	-0.1	0	0	0.1	0	0.2	0.4
XZ009	申扎县	2019-12-15 13:00:00	-2.7	-4.2	-4.6	-4.7	-4.5	-4.2	-4	-3.9	-3.5	-3.2	-3.2	-2.9	-2.5	-1.9	-1.8	-1.5	-1.5	-1.2	-0.9	-0.7	-0.7	-0.7	-0.7	-0.5	0	-0.1	0	0	0.1	0	0.2	0.4
XZ009	申扎县	2019-12-15 14:00:00	-1.2	-2.8	-3.5	-3.9	-3.9	-3.9	-3.8	-3.7	-3.5	-3.1	-3.1	-2.9	-2.5	-2	-1.9	-1.6	-1.5	-1.2	-1	-0.7	-0.7	-0.7	-0.7	-0.5	0	-0.1	0	0	0.1	0	0.2	0.4
XZ009	申扎县	2019-12-15 15:00:00	-0.8	-2	-2.6	-3.1	-3.2	-3.4	-3.4	-3.5	-3.4	-3	-3	-2.8	-2.5	-2	-1.9	-1.6	-1.6	-1.2	-1	-0.7	-0.7	-0.7	-0.7	-0.5	0	-0.1	0	0	0	0	0.1	0.4
XZ009	申扎县	2019-12-15 16:00:00	-0.7	-1.5	-2	-2.5	-2.7	-2.9	-3.1	-3.2	-3.1	-2.9	-2.9	-2.7	-2.5	-2	-1.9	-1.6	-1.6	-1.2	-1	-0.7	-0.7	-0.7	-0.7	-0.5	0	-0.1	0	0	0.1	0	0.2	0.4
XZ009	申扎县	2019-12-15 17:00:00	-1.7	-1.8	-2	-2.3	-2.4	-2.6	-2.8	-2.9	-2.9	-2.8	-2.8	-2.6	-2.4	-2	-1.9	-1.7	-1.6	-1.2	-1	-0.7	-0.7	-0.7	-0.7	-0.5	0	-0.1	0	0	0.1	0	0.1	0.4
XZ009	申扎县	2019-12-15 18:00:00	-2.3	-2.2	-2.2	-2.3	-2.3	-2.4	-2.6	-2.7	-2.7	-2.6	-2.6	-2.5	-2.4	-2	-1.9	-1.7	-1.6	-1.3	-1	-0.7	-0.8	-0.7	-0.7	-0.5	0	-0.1	0	0	0.1	0	0.2	0.4
XZ009	申扎县	2019-12-15 19:00:00	-3.1	-2.6	-2.5	-2.5	-2.4	-2.4	-2.5	-2.7	-2.6	-2.5	-2.5	-2.4	-2.2	-1.9	-1.9	-1.6	-1.6	-1.3	-1	-0.8	-0.8	-0.7	-0.7	-0.5	0	-0.1	-0.1	0	0	0	0.1	0.4
XZ009	申扎县	2019-12-15 20:00:00	-3.9	-3.2	-2.9	-2.7	-2.5	-2.4	-2.4	-2.5	-2.5	-2.4	-2.4	-2.3	-2.2	-1.9	-1.8	-1.6	-1.6	-1.3	-1	-0.7	-0.8	-0.7	-0.7	-0.5	0	-0.2	-0.1	0	0	0	0.2	0.4
XZ009	申扎县	2019-12-15 21:00:00	-4.6	-3.7	-3.3	-3	-2.7	-2.5	-2.5	-2.5	-2.5	-2.4	-2.4	-2.2	-2.1	-1.8	-1.7	-1.5	-1.5	-1.2	-1	-0.8	-0.8	-0.7	-0.7	-0.5	0	-0.1	0	0	0	0	0.1	0.4
XZ009	申扎县	2019-12-15 22:00:00	-5	-4.1	-3.7	-3.3	-2.9	-2.6	-2.5	-2.5	-2.5	-2.3	-2.3	-2.2	-2	-1.7	-1.7	-1.5	-1.5	-1.2	-1	-0.8	-0.8	-0.7	-0.7	-0.6	0	-0.1	-0.1	0	0.1	0	0.2	0.4
XZ009	申扎县	2019-12-15 23:00:00	-5.4	-4.5	-4	-3.5	-3	-2.8	-2.7	-2.6	-2.5	-2.3	-2.3	-2.2	-2	-1.7	-1.7	-1.5	-1.5	-1.2	-1	-0.7	-0.8	-0.7	-0.7	-0.6	0	-0.2	-0.1	0	0	0	0.1	0.4
XZ009	申扎县	2019-12-16 00:00:00	-5.7	-4.7	-4.2	-3.8	-3.2	-2.9	-2.7	-2.7	-2.5	-2.3	-2.3	-2.2	-2	-1.7	-1.7	-1.5	-1.5	-1.2	-1	-0.7	-0.8	-0.7	-0.7	-0.6	0	-0.2	0	0	0	0	0.1	0.4
XZ009	申扎县	2019-12-16 01:00:00	-6.1	-5	-4.4	-4	-3.4	-3	-2.9	-2.8	-2.6	-2.4	-2.4	-2.2	-2	-1.7	-1.7	-1.5	-1.5	-1.2	-1	-0.7	-0.8	-0.7	-0.7	-0.5	0	-0.2	-0.1	0	0	0	0.1	0.3
XZ009	申扎县	2019-12-16 02:00:00	-6.7	-5.4	-4.7	-4.2	-3.6	-3.2	-3	-2.9	-2.7	-2.4	-2.4	-2.2	-2	-1.7	-1.6	-1.5	-1.5	-1.2	-1	-0.7	-0.7	-0.7	-0.7	-0.6	0	-0.2	-0.1	0	0	0	0.1	0.4
XZ009	申扎县	2019-12-16 03:00:00	-7.5	-6	-5.2	-4.6	-3.9	-3.4	-3.1	-3	-2.7	-2.5	-2.5	-2.3	-2	-1.7	-1.7	-1.5	-1.5	-1.2	-1	-0.7	-0.8	-0.7	-0.7	-0.6	0	-0.2	-0.1	0	0	0	0.1	0.3
XZ009	申扎县	2019-12-16 04:00:00	-8.6	-6.7	-5.7	-5	-4.1	-3.6	-3.2	-3.1	-2.8	-2.5	-2.5	-2.3	-2.1	-1.7	-1.7	-1.5	-1.5	-1.2	-1	-0.7	-0.7	-0.7	-0.7	-0.6	0	-0.2	-0.1	0	0	0	0.1	0.3
XZ009	申扎县	2019-12-16 05:00:00	-9.1	-7.2	-6.2	-5.4	-4.5	-3.9	-3.4	-3.2	-2.9	-2.6	-2.6	-2.4	-2.2	-1.7	-1.7	-1.5	-1.5	-1.2	-1	-0.7	-0.8	-0.7	-0.7	-0.5	0	-0.2	-0.1	0	0	0	0.1	0.3
XZ009	申扎县	2019-12-16 06:00:00	-9.7	-7.7	-6.7	-5.8	-4.8	-4.1	-3.7	-3.4	-3.1	-2.7	-2.7	-2.5	-2.2	-1.7	-1.7	-1.5	-1.5	-1.2	-1	-0.7	-0.7	-0.7	-0.7	-0.6	0	-0.2	-0.1	0	0	0	0.1	0.4
XZ009	申扎县	2019-12-16 07:00:00	-10.3	-8.3	-7.2	-6.2	-5.2	-4.4	-3.9	-3.6	-3.2	-2.9	-2.9	-2.5	-2.3	-1.8	-1.7	-1.5	-1.5	-1.2	-1	-0.7	-0.7	-0.7	-0.7	-0.6	0	-0.2	-0.1	0	0	0	0.1	0.4
XZ009	申扎县	2019-12-16 08:00:00	-10.7	-8.7	-7.6	-6.6	-5.5	-4.7	-4.2	-3.8	-3.4	-3	-3	-2.7	-2.4	-1.9	-1.7	-1.5	-1.5	-1.2	-1	-0.7	-0.7	-0.7	-0.7	-0.6	0	-0.2	-0.1	0	0	0	0.1	0.4
XZ009	申扎县	2019-12-16 09:00:00	-11.5	-9.2	-8	-7	-5.8	-5	-4.4	-4	-3.6	-3.1	-3.1	-2.8	-2.5	-1.9	-1.8	-1.6	-1.5	-1.2	-1	-0.7	-0.8	-0.8	-0.7	-0.6	0	-0.2	-0.1	0	0	0	0.1	0.3
XZ009	申扎县	2019-12-16 10:00:00	-11.2	-9.5	-8.4	-7.4	-6.2	-5.3	-4.6	-4.2	-3.8	-3.3	-3.3	-2.9	-2.6	-2	-1.9	-1.6	-1.6	-1.2	-1	-0.8	-0.8	-0.8	-0.7	-0.6	-0.1	-0.2	-0.1	0	0	0	0.1	0.4
XZ009	申扎县	2019-12-16 11:00:00	-8.8	-8.7	-8.2	-7.4	-6.4	-5.5	-4.9	-4.5	-4	-3.4	-3.4	-3	-2.7	-2	-1.9	-1.7	-1.6	-1.2	-1	-0.8	-0.8	-0.7	-0.7	-0.6	0	-0.2	-0.1	0	0	0	0.1	0.3
XZ009	申扎县	2019-12-16 12:00:00	-6.4	-7.2	-7.3	-7	-6.2	-5.5	-5	-4.6	-4.1	-3.6	-3.6	-3.2	-2.9	-2.2	-2	-1.7	-1.7	-1.3	-1	-0.8	-0.8	-0.8	-0.7	-0.6	0	-0.2	-0.1	0	0	0	0.1	0.3
XZ009	申扎县	2019-12-16 13:00:00	-4.2	-5.5	-6	-6.1	-5.7	-5.3	-4.9	-4.7	-4.2	-3.7	-3.7	-3.4	-2.9	-2.2	-2	-1.8	-1.7	-1.4	-1.1	-0.8	-0.8	-0.8	-0.7	-0.6	0	-0.2	-0.1	0	0	0	0.1	0.4
XZ009	申扎县	2019-12-16 14:00:00	-2.9	-4.2	-4.9	-5.2	-5	-4.9	-4.7	-4.5	-4.2	-3.8	-3.8	-3.4	-3	-2.3	-2.1	-1.8	-1.7	-1.4	-1.1	-0.8	-0.9	-0.8	-0.7	-0.6	-0.1	-0.2	-0.1	0	0	0	0.1	0.3
XZ009	申扎县	2019-12-16 15:00:00	-2	-3.4	-4	-4.4	-4.5	-4.5	-4.4	-4.4	-4.1	-3.7	-3.7	-3.4	-3	-2.4	-2.2	-1.9	-1.8	-1.4	-1.1	-0.9	-0.9	-0.8	-0.7	-0.6	0	-0.2	-0.2	0	0	0	0.1	0.3
XZ009	申扎县	2019-12-16 16:00:00	-1.5	-2.7	-3.3	-3.8	-3.9	-4	-4	-4.1	-3.9	-3.6	-3.6	-3.4	-3	-2.4	-2.2	-1.9	-1.8	-1.4	-1.2	-0.9	-0.9	-0.8	-0.8	-0.6	0	-0.2	-0.2	0	0	0	0.1	0.3
XZ009	申扎县	2019-12-16 17:00:00	-1.4	-2.3	-2.8	-3.2	-3.4	-3.5	-3.7	-3.8	-3.7	-3.5	-3.5	-3.2	-3	-2.4	-2.2	-1.9	-1.9	-1.4	-1.2	-0.9	-0.9	-0.8	-0.8	-0.7	-0.1	-0.2	-0.2	0	0	0	0.1	0.3
XZ009	申扎县	2019-12-16 18:00:00	-2	-2.4	-2.6	-2.9	-3	-3.2	-3.4	-3.5	-3.5	-3.3	-3.3	-3.1	-2.9	-2.4	-2.2	-1.9	-1.9	-1.5	-1.2	-0.9	-0.9	-0.9	-0.8	-0.7	-0.1	-0.2	-0.2	0	0	0	0.1	0.3
XZ009	申扎县	2019-12-16 19:00:00	-3.6	-3	-2.9	-2.9	-2.9	-3	-3.2	-3.4	-3.3	-3.1	-3.1	-3	-2.8	-2.3	-2.2	-1.9	-1.9	-1.5	-1.2	-0.9	-0.9	-0.9	-0.8	-0.7	-0.1	-0.2	-0.2	0	0	0	0.1	0.3
XZ009	申扎县	2019-12-16 20:00:00	-5.7	-4.2	-3.7	-3.4	-3.1	-3	-3.1	-3.2	-3.1	-3	-3	-2.9	-2.7	-2.3	-2.1	-1.9	-1.9	-1.5	-1.2	-0.9	-0.9	-0.9	-0.8	-0.7	-0.1	-0.2	-0.2	0	0	0	0.1	0.3
XZ009	申扎县	2019-12-16 21:00:00	-7.3	-5.5	-4.6	-4.1	-3.5	-3.2	-3.2	-3.2	-3.1	-2.9	-2.9	-2.8	-2.6	-2.2	-2.1	-1.9	-1.9	-1.5	-1.2	-0.9	-1	-0.9	-0.8	-0.7	-0.1	-0.2	-0.2	0	0	0	0.1	0.3
XZ009	申扎县	2019-12-16 22:00:00	-8.5	-6.5	-5.5	-4.8	-4	-3.6	-3.4	-3.3	-3.1	-2.9	-2.9	-2.7	-2.5	-2.2	-2	-1.9	-1.9	-1.5	-1.2	-1	-0.9	-0.9	-0.9	-0.7	-0.1	-0.2	-0.2	0	0	0	0.1	0.3
XZ009	申扎县	2019-12-16 23:00:00	-9.4	-7.3	-6.3	-5.4	-4.5	-4	-3.6	-3.5	-3.2	-2.9	-2.9	-2.7	-2.5	-2.2	-2	-1.8	-1.9	-1.4	-1.2	-1	-0.9	-0.9	-0.9	-0.7	-0.2	-0.2	-0.2	0	0	0	0.1	0.3
XZ009	申扎县	2019-12-17 00:00:00	-9.9	-8	-6.9	-6	-5	-4.4	-3.9	-3.7	-3.4	-3	-3	-2.8	-2.5	-2.2	-2	-1.8	-1.8	-1.4	-1.2	-0.9	-0.9	-0.9	-0.9	-0.7	-0.2	-0.2	-0.2	0	0	0	0.1	0.3
XZ009	申扎县	2019-12-17 01:00:00	-10.8	-8.7	-7.5	-6.5	-5.5	-4.7	-4.2	-3.9	-3.5	-3.2	-3.2	-2.9	-2.6	-2.2	-2	-1.8	-1.8	-1.4	-1.2	-1	-1	-0.9	-0.9	-0.7	-0.2	-0.2	-0.2	0	0	0	0.1	0.3
XZ009	申扎县	2019-12-17 02:00:00	-11.4	-9.4	-8.1	-7	-5.9	-5	-4.5	-4.2	-3.7	-3.3	-3.3	-3	-2.7	-2.2	-2	-1.8	-1.8	-1.4	-1.2	-1	-1	-0.9	-0.9	-0.7	-0.2	-0.2	-0.2	0	0	0	0.1	0.3
XZ009	申扎县	2019-12-17 03:00:00	-12	-9.9	-8.6	-7.5	-6.3	-5.4	-4.8	-4.4	-3.9	-3.5	-3.5	-3.1	-2.8	-2.2	-2.1	-1.9	-1.8	-1.5	-1.2	-1	-1	-0.9	-0.9	-0.7	-0.2	-0.2	-0.2	0	0	0	0.1	0.3
XZ009	申扎县	2019-12-17 04:00:00	-11.7	-10	-8.9	-7.9	-6.7	-5.7	-5	-4.7	-4.2	-3.7	-3.7	-3.3	-2.9	-2.3	-2.1	-1.9	-1.9	-1.5	-1.2	-1	-1	-0.9	-0.9	-0.7	-0.2	-0.2	-0.2	0	0	0	0.1	0.3
XZ009	申扎县	2019-12-17 05:00:00	-12.2	-10.4	-9.2	-8.2	-7	-6	-5.4	-4.9	-4.4	-3.9	-3.9	-3.4	-3	-2.4	-2.2	-1.9	-1.9	-1.5	-1.2	-0.9	-1	-0.9	-0.9	-0.7	-0.2	-0.3	-0.2	0	0	0	0.1	0.3
XZ009	申扎县	2019-12-17 06:00:00	-12.6	-10.8	-9.6	-8.5	-7.2	-6.3	-5.6	-5.1	-4.6	-4	-4	-3.6	-3.2	-2.4	-2.2	-2	-1.9	-1.5	-1.2	-1	-1	-0.9	-0.9	-0.7	-0.2	-0.3	-0.2	0	0	0	0.1	0.3
XZ009	申扎县	2019-12-17 07:00:00	-12.9	-11	-9.9	-8.8	-7.5	-6.5	-5.8	-5.4	-4.7	-4.2	-4.2	-3.7	-3.2	-2.5	-2.3	-2	-2	-1.5	-1.3	-1	-1	-0.9	-0.9	-0.7	-0.2	-0.3	-0.2	0	0	0	0.1	0.3
XZ009	申扎县	2019-12-17 08:00:00	-13.7	-11.6	-10.3	-9.1	-7.9	-6.8	-6	-5.5	-4.9	-4.3	-4.3	-3.9	-3.4	-2.5	-2.4	-2	-2	-1.5	-1.3	-1	-1	-1	-0.9	-0.7	-0.2	-0.3	-0.2	0	0	0	0.1	0.3
XZ009	申扎县	2019-12-17 09:00:00	-14.2	-12	-10.7	-9.5	-8.2	-7.1	-6.3	-5.8	-5.1	-4.5	-4.5	-4	-3.5	-2.7	-2.4	-2.1	-2	-1.6	-1.4	-1	-1	-1	-0.9	-0.7	-0.2	-0.3	-0.2	0	0	0	0.1	0.3
XZ009	申扎县	2019-12-17 10:00:00	-13.7	-12.2	-11	-9.8	-8.5	-7.4	-6.5	-6	-5.3	-4.7	-4.7	-4.2	-3.7	-2.7	-2.5	-2.2	-2	-1.7	-1.4	-1	-1	-1	-0.9	-0.7	-0.2	-0.3	-0.2	0	0	0	0.1	0.3
XZ009	申扎县	2019-12-17 11:00:00	-10.8	-10.9	-10.5	-9.7	-8.5	-7.5	-6.7	-6.2	-5.5	-4.9	-4.9	-4.3	-3.8	-2.9	-2.5	-2.2	-2.1	-1.7	-1.4	-1.1	-1	-1	-0.9	-0.8	-0.2	-0.3	-0.2	0	0	0	0.1	0.3
XZ009	申扎县	2019-12-17 12:00:00	-7.8	-9	-9.2	-8.9	-8.2	-7.4	-6.8	-6.3	-5.7	-5	-5	-4.4	-3.9	-2.9	-2.7	-2.3	-2.1	-1.7	-1.4	-1.1	-1.1	-1	-1	-0.8	-0.2	-0.3	-0.2	0	0	0	0.1	0.3
XZ009	申扎县	2019-12-17 13:00:00	-5.2	-6.9	-7.5	-7.7	-7.4	-7	-6.5	-6.2	-5.7	-5	-5	-4.5	-4	-3	-2.7	-2.4	-2.2	-1.7	-1.5	-1.2	-1.1	-1	-1	-0.8	-0.2	-0.3	-0.2	-0.1	0	0	0.1	0.3
XZ009	申扎县	2019-12-17 14:00:00	-4.5	-5.5	-6.1	-6.5	-6.5	-6.4	-6.2	-6	-5.5	-5	-5	-4.5	-4	-3.1	-2.8	-2.4	-2.3	-1.8	-1.5	-1.2	-1.2	-1	-1	-0.8	-0.2	-0.4	-0.2	0	0	0	0.1	0.3
XZ009	申扎县	2019-12-17 15:00:00	-3.9	-4.8	-5.4	-5.7	-5.7	-5.7	-5.7	-5.7	-5.4	-4.9	-4.9	-4.5	-4	-3.2	-2.9	-2.5	-2.3	-1.9	-1.5	-1.2	-1.2	-1	-1	-0.8	-0.2	-0.4	-0.3	0	0	0	0.1	0.3
XZ009	申扎县	2019-12-17 16:00:00	-3.1	-4.1	-4.7	-5	-5.1	-5.2	-5.3	-5.3	-5.1	-4.7	-4.7	-4.4	-4	-3.2	-2.9	-2.5	-2.4	-1.9	-1.6	-1.2	-1.2	-1.1	-1	-0.9	-0.3	-0.4	-0.3	-0.1	0	0	0	0.3
XZ009	申扎县	2019-12-17 17:00:00	-2.9	-3.6	-4	-4.5	-4.6	-4.7	-4.9	-5	-4.8	-4.5	-4.5	-4.2	-3.9	-3.2	-2.9	-2.5	-2.4	-1.9	-1.6	-1.3	-1.2	-1.1	-1	-0.9	-0.3	-0.4	-0.3	-0.1	0	0	0	0.3
XZ009	申扎县	2019-12-17 18:00:00	-3.4	-3.6	-3.9	-4.2	-4.2	-4.4	-4.5	-4.7	-4.5	-4.3	-4.3	-4.1	-3.8	-3.1	-2.9	-2.6	-2.4	-2	-1.7	-1.3	-1.2	-1.2	-1	-0.9	-0.3	-0.4	-0.3	-0.1	0	0	0	0.3
XZ009	申扎县	2019-12-17 19:00:00	-4.8	-4.2	-4	-4.1	-4	-4.2	-4.2	-4.4	-4.3	-4.1	-4.1	-3.9	-3.7	-3	-2.9	-2.5	-2.4	-2	-1.7	-1.4	-1.3	-1.2	-1	-0.9	-0.3	-0.4	-0.3	-0.1	0	0	0	0.3
XZ009	申扎县	2019-12-17 20:00:00	-6.9	-5.4	-4.9	-4.5	-4.2	-4.1	-4.1	-4.2	-4.1	-3.9	-3.9	-3.7	-3.5	-3	-2.8	-2.5	-2.4	-2	-1.7	-1.4	-1.3	-1.2	-1.1	-0.9	-0.4	-0.4	-0.3	-0.1	0	0	0	0.3
XZ009	申扎县	2019-12-17 21:00:00	-8.5	-6.7	-5.8	-5.2	-4.6	-4.3	-4.2	-4.2	-4	-3.8	-3.8	-3.7	-3.4	-2.9	-2.8	-2.5	-2.4	-2	-1.7	-1.4	-1.3	-1.2	-1.1	-0.9	-0.4	-0.4	-0.4	-0.1	0	0	0	0.3
XZ009	申扎县	2019-12-17 22:00:00	-9.6	-7.7	-6.7	-5.9	-5.1	-4.7	-4.4	-4.3	-4	-3.8	-3.8	-3.6	-3.4	-2.9	-2.7	-2.5	-2.4	-2	-1.7	-1.4	-1.4	-1.2	-1.2	-0.9	-0.4	-0.4	-0.4	-0.1	0	0	0	0.2
XZ009	申扎县	2019-12-17 23:00:00	-10.6	-8.5	-7.4	-6.5	-5.7	-5	-4.6	-4.4	-4.2	-3.9	-3.9	-3.6	-3.4	-2.9	-2.7	-2.5	-2.4	-2	-1.7	-1.4	-1.4	-1.2	-1.2	-1	-0.4	-0.4	-0.4	-0.2	0	0	0	0.2
XZ009	申扎县	2019-12-18 00:00:00	-11.4	-9.3	-8.1	-7.2	-6.1	-5.4	-4.9	-4.7	-4.3	-3.9	-3.9	-3.7	-3.4	-2.8	-2.7	-2.5	-2.4	-1.9	-1.7	-1.4	-1.4	-1.3	-1.2	-1	-0.4	-0.4	-0.4	-0.2	0	0	0	0.2
XZ009	申扎县	2019-12-18 01:00:00	-12.1	-10	-8.7	-7.7	-6.6	-5.8	-5.2	-4.9	-4.5	-4	-4	-3.7	-3.4	-2.9	-2.7	-2.4	-2.4	-2	-1.7	-1.4	-1.4	-1.3	-1.2	-1	-0.4	-0.5	-0.4	-0.2	0	0	0	0.2
XZ009	申扎县	2019-12-18 02:00:00	-12.7	-10.6	-9.3	-8.2	-7	-6.2	-5.5	-5.2	-4.7	-4.2	-4.2	-3.9	-3.5	-2.9	-2.7	-2.4	-2.4	-2	-1.7	-1.4	-1.4	-1.3	-1.2	-1	-0.4	-0.5	-0.4	-0.2	0	0	0	0.2
XZ009	申扎县	2019-12-18 03:00:00	-13	-11	-9.8	-8.7	-7.5	-6.5	-5.8	-5.4	-4.9	-4.4	-4.4	-4	-3.6	-2.9	-2.7	-2.5	-2.4	-2	-1.7	-1.4	-1.4	-1.3	-1.2	-1	-0.4	-0.5	-0.4	-0.2	0	0	0	0.2
XZ009	申扎县	2019-12-18 04:00:00	-12.5	-11.1	-10	-9	-7.8	-6.8	-6.1	-5.7	-5.1	-4.5	-4.5	-4.2	-3.7	-3	-2.8	-2.5	-2.4	-2	-1.7	-1.4	-1.4	-1.3	-1.2	-1	-0.4	-0.5	-0.4	-0.2	0	0	0	0.2
XZ009	申扎县	2019-12-18 05:00:00	-12.5	-11.1	-10.1	-9.2	-8	-7	-6.4	-5.9	-5.4	-4.7	-4.7	-4.3	-3.9	-3.1	-2.9	-2.5	-2.5	-2	-1.7	-1.5	-1.4	-1.3	-1.2	-1	-0.4	-0.5	-0.4	-0.2	0	0	0	0.2
XZ009	申扎县	2019-12-18 06:00:00	-12.9	-11.3	-10.3	-9.4	-8.2	-7.2	-6.5	-6.1	-5.5	-4.9	-4.9	-4.5	-4	-3.2	-2.9	-2.6	-2.5	-2	-1.8	-1.4	-1.4	-1.3	-1.2	-1	-0.5	-0.5	-0.4	-0.2	0	0	0	0.2
XZ009	申扎县	2019-12-18 07:00:00	-13.5	-11.7	-10.6	-9.6	-8.4	-7.5	-6.8	-6.3	-5.7	-5	-5	-4.6	-4.1	-3.2	-3	-2.7	-2.5	-2	-1.8	-1.5	-1.4	-1.4	-1.2	-1	-0.5	-0.5	-0.4	-0.2	0	0	0	0.2
XZ009	申扎县	2019-12-18 08:00:00	-14.2	-12.2	-11	-9.9	-8.7	-7.7	-7	-6.5	-5.9	-5.2	-5.2	-4.7	-4.2	-3.4	-3	-2.7	-2.6	-2.2	-1.8	-1.5	-1.4	-1.4	-1.2	-1	-0.5	-0.5	-0.4	-0.2	0	0	0	0.2
XZ009	申扎县	2019-12-18 09:00:00	-14.6	-12.7	-11.4	-10.3	-9	-8	-7.2	-6.7	-6	-5.4	-5.4	-4.9	-4.4	-3.4	-3.1	-2.8	-2.6	-2.2	-1.9	-1.5	-1.5	-1.4	-1.3	-1.1	-0.5	-0.5	-0.4	-0.2	0	-0.1	0	0.2
XZ009	申扎县	2019-12-18 10:00:00	-14.1	-12.8	-11.7	-10.5	-9.2	-8.2	-7.4	-6.9	-6.2	-5.5	-5.5	-5	-4.5	-3.5	-3.2	-2.8	-2.7	-2.2	-1.9	-1.5	-1.5	-1.4	-1.3	-1.1	-0.5	-0.5	-0.5	-0.2	-0.1	-0.1	0	0.1
XZ009	申扎县	2019-12-19 10:00:00	-9	-8.5	-7.9	-7.4	-6.5	-5.9	-5.5	-5.2	-4.9	-4.5	-4.5	-4.2	-3.8	-3.2	-3	-2.7	-2.7	-2.3	-2	-1.8	-1.7	-1.7	-1.6	-1.4	-0.8	-0.9	-0.7	-0.5	-0.4	-0.4	-0.1	0
XZ009	申扎县	2019-12-19 11:00:00	-6.9	-7.5	-7.5	-7.2	-6.5	-6	-5.6	-5.4	-5	-4.5	-4.5	-4.2	-3.9	-3.2	-3.1	-2.8	-2.7	-2.4	-2	-1.7	-1.7	-1.7	-1.6	-1.4	-0.8	-0.9	-0.7	-0.5	-0.4	-0.4	-0.1	0
XZ009	申扎县	2019-12-19 12:00:00	-4.5	-6	-6.4	-6.5	-6.2	-5.9	-5.6	-5.4	-5	-4.6	-4.6	-4.3	-3.9	-3.3	-3.1	-2.9	-2.8	-2.4	-2.1	-1.8	-1.7	-1.7	-1.5	-1.4	-0.8	-0.9	-0.7	-0.5	-0.4	-0.4	-0.1	0
XZ009	申扎县	2019-12-19 13:00:00	-2.4	-4.3	-5.1	-5.5	-5.5	-5.5	-5.4	-5.3	-5	-4.6	-4.6	-4.4	-4	-3.4	-3.2	-2.9	-2.8	-2.4	-2.1	-1.8	-1.8	-1.7	-1.6	-1.4	-0.8	-0.9	-0.8	-0.5	-0.4	-0.4	-0.1	0
XZ009	申扎县	2019-12-19 14:00:00	-0.7	-2.9	-3.9	-4.5	-4.7	-4.9	-5	-5	-4.9	-4.5	-4.5	-4.3	-4	-3.4	-3.2	-2.9	-2.8	-2.4	-2.1	-1.9	-1.8	-1.7	-1.6	-1.4	-0.8	-0.9	-0.8	-0.5	-0.4	-0.4	-0.1	0
XZ009	申扎县	2019-12-19 15:00:00	0.1	-1.9	-2.9	-3.6	-4	-4.3	-4.5	-4.7	-4.6	-4.4	-4.4	-4.2	-3.9	-3.4	-3.2	-2.9	-2.9	-2.4	-2.2	-1.8	-1.8	-1.7	-1.6	-1.4	-0.9	-0.9	-0.8	-0.5	-0.4	-0.4	-0.2	0
XZ009	申扎县	2019-12-19 16:00:00	1	-0.9	-2	-2.9	-3.3	-3.7	-4	-4.4	-4.3	-4.2	-4.2	-4	-3.8	-3.3	-3.2	-2.9	-2.9	-2.4	-2.2	-1.9	-1.8	-1.7	-1.6	-1.4	-0.9	-0.9	-0.8	-0.5	-0.4	-0.4	-0.2	0
XZ009	申扎县	2019-12-19 17:00:00	1.1	-0.5	-1.5	-2.3	-2.8	-3.2	-3.6	-4	-4	-3.9	-3.9	-3.9	-3.7	-3.2	-3.2	-2.9	-2.9	-2.4	-2.2	-1.9	-1.8	-1.7	-1.6	-1.4	-0.9	-0.9	-0.8	-0.5	-0.4	-0.4	-0.2	0
XZ009	申扎县	2019-12-19 18:00:00	0.6	-0.4	-1.2	-1.9	-2.4	-2.8	-3.2	-3.6	-3.7	-3.7	-3.7	-3.6	-3.5	-3.2	-3	-2.8	-2.8	-2.4	-2.2	-1.9	-1.9	-1.7	-1.7	-1.5	-0.9	-0.9	-0.8	-0.5	-0.4	-0.4	-0.2	0
XZ009	申扎县	2019-12-19 19:00:00	-0.4	-0.8	-1.2	-1.7	-2.1	-2.5	-2.9	-3.3	-3.4	-3.4	-3.4	-3.4	-3.4	-3.1	-3	-2.8	-2.8	-2.4	-2.2	-1.9	-1.8	-1.7	-1.7	-1.5	-0.9	-0.9	-0.8	-0.6	-0.4	-0.4	-0.2	0
XZ009	申扎县	2019-12-19 20:00:00	-2.3	-1.7	-1.7	-1.9	-2	-2.4	-2.7	-3	-3.2	-3.2	-3.2	-3.2	-3.2	-3	-2.9	-2.7	-2.7	-2.4	-2.1	-1.8	-1.8	-1.7	-1.7	-1.5	-0.9	-0.9	-0.9	-0.6	-0.4	-0.4	-0.2	0
XZ009	申扎县	2019-12-19 21:00:00	-3.9	-2.8	-2.4	-2.4	-2.2	-2.4	-2.7	-2.9	-3	-3	-3	-3	-3	-2.9	-2.8	-2.7	-2.7	-2.3	-2.1	-1.8	-1.8	-1.7	-1.6	-1.5	-0.9	-0.9	-0.9	-0.6	-0.4	-0.4	-0.2	0
XZ009	申扎县	2019-12-19 22:00:00	-4.9	-3.7	-3.2	-2.9	-2.6	-2.6	-2.7	-2.9	-3	-2.9	-2.9	-2.9	-2.9	-2.7	-2.7	-2.6	-2.6	-2.3	-2	-1.8	-1.8	-1.7	-1.6	-1.5	-0.9	-0.9	-0.9	-0.6	-0.4	-0.4	-0.2	0
XZ009	申扎县	2019-12-19 23:00:00	-5.4	-4.4	-3.8	-3.4	-3	-2.8	-2.9	-3	-2.9	-2.9	-2.9	-2.9	-2.8	-2.7	-2.7	-2.5	-2.5	-2.2	-2	-1.7	-1.7	-1.7	-1.6	-1.5	-0.9	-0.9	-0.9	-0.6	-0.5	-0.5	-0.2	0
XZ009	申扎县	2019-12-20 00:00:00	-5.5	-4.7	-4.3	-3.9	-3.4	-3.1	-3	-3	-3	-2.9	-2.9	-2.9	-2.8	-2.6	-2.5	-2.4	-2.5	-2.2	-2	-1.7	-1.7	-1.7	-1.6	-1.5	-0.9	-0.9	-0.9	-0.6	-0.5	-0.4	-0.2	0
XZ009	申扎县	2019-12-20 01:00:00	-5.7	-4.9	-4.5	-4.2	-3.6	-3.4	-3.2	-3.2	-3.1	-2.9	-2.9	-2.9	-2.7	-2.5	-2.5	-2.4	-2.4	-2.1	-1.9	-1.7	-1.7	-1.7	-1.6	-1.4	-0.9	-1	-0.9	-0.6	-0.5	-0.4	-0.2	0
XZ009	申扎县	2019-12-20 02:00:00	-6	-5.2	-4.8	-4.4	-3.9	-3.5	-3.4	-3.4	-3.2	-3	-3	-2.9	-2.7	-2.5	-2.5	-2.4	-2.4	-2.1	-1.9	-1.7	-1.7	-1.6	-1.5	-1.4	-0.9	-0.9	-0.9	-0.7	-0.5	-0.5	-0.2	0
XZ009	申扎县	2019-12-20 03:00:00	-6.4	-5.5	-5.1	-4.7	-4.1	-3.7	-3.5	-3.5	-3.2	-3	-3	-2.9	-2.8	-2.5	-2.5	-2.3	-2.4	-2	-1.9	-1.6	-1.6	-1.6	-1.5	-1.4	-0.9	-1	-0.9	-0.7	-0.5	-0.4	-0.2	0
XZ009	申扎县	2019-12-20 04:00:00	-6.6	-5.7	-5.3	-4.9	-4.3	-3.9	-3.7	-3.6	-3.4	-3.1	-3.1	-2.9	-2.8	-2.5	-2.4	-2.3	-2.4	-2	-1.9	-1.6	-1.6	-1.6	-1.5	-1.4	-0.8	-0.9	-0.9	-0.6	-0.5	-0.5	-0.3	0
XZ009	申扎县	2019-12-20 05:00:00	-7	-6.1	-5.5	-5.1	-4.5	-4.1	-3.9	-3.7	-3.5	-3.2	-3.2	-3	-2.9	-2.5	-2.4	-2.3	-2.4	-2	-1.8	-1.5	-1.6	-1.5	-1.5	-1.4	-0.9	-0.9	-0.9	-0.7	-0.5	-0.5	-0.2	0
XZ009	申扎县	2019-12-20 06:00:00	-7	-6.2	-5.8	-5.4	-4.7	-4.3	-4	-3.9	-3.5	-3.3	-3.3	-3.1	-2.9	-2.5	-2.4	-2.3	-2.3	-2	-1.8	-1.5	-1.6	-1.5	-1.5	-1.4	-0.8	-0.9	-0.9	-0.7	-0.5	-0.5	-0.2	0
XZ009	申扎县	2019-12-20 07:00:00	-7.5	-6.5	-6	-5.5	-4.9	-4.4	-4.1	-4	-3.7	-3.4	-3.4	-3.2	-2.9	-2.5	-2.5	-2.3	-2.3	-2	-1.8	-1.5	-1.5	-1.5	-1.5	-1.4	-0.8	-0.9	-0.9	-0.7	-0.5	-0.5	-0.3	0
XZ009	申扎县	2019-12-20 08:00:00	-7.5	-6.7	-6.2	-5.7	-5	-4.6	-4.3	-4.1	-3.8	-3.5	-3.5	-3.2	-3	-2.5	-2.5	-2.3	-2.3	-2	-1.8	-1.5	-1.5	-1.5	-1.5	-1.4	-0.8	-0.9	-0.8	-0.7	-0.5	-0.5	-0.3	0
XZ009	申扎县	2019-12-20 09:00:00	-7.5	-6.8	-6.4	-5.9	-5.2	-4.7	-4.4	-4.2	-3.9	-3.5	-3.5	-3.4	-3	-2.6	-2.5	-2.4	-2.3	-2	-1.8	-1.5	-1.5	-1.5	-1.5	-1.4	-0.8	-0.9	-0.9	-0.6	-0.5	-0.5	-0.3	0
XZ009	申扎县	2019-12-20 10:00:00	-7	-6.8	-6.4	-6	-5.4	-4.9	-4.5	-4.4	-4	-3.7	-3.7	-3.4	-3.1	-2.7	-2.5	-2.4	-2.4	-2	-1.8	-1.5	-1.5	-1.5	-1.5	-1.4	-0.8	-0.9	-0.9	-0.6	-0.5	-0.5	-0.3	0
XZ009	申扎县	2019-12-20 12:00:00	-3.1	-4.4	-4.9	-5.1	-4.9	-4.7	-4.5	-4.4	-4.2	-3.8	-3.8	-3.5	-3.2	-2.7	-2.6	-2.4	-2.4	-2	-1.8	-1.5	-1.5	-1.5	-1.5	-1.4	-0.8	-0.9	-0.9	-0.6	-0.5	-0.5	-0.3	0
XZ009	申扎县	2019-12-20 13:00:00	-0.9	-3	-3.8	-4.3	-4.3	-4.3	-4.3	-4.3	-4.1	-3.8	-3.8	-3.5	-3.3	-2.8	-2.7	-2.4	-2.4	-2	-1.8	-1.5	-1.5	-1.5	-1.5	-1.4	-0.8	-0.9	-0.9	-0.7	-0.5	-0.5	-0.3	0
XZ009	申扎县	2019-12-20 15:00:00	1.3	-0.9	-1.9	-2.6	-2.9	-3.3	-3.5	-3.8	-3.7	-3.5	-3.5	-3.4	-3.2	-2.8	-2.7	-2.5	-2.5	-2	-1.9	-1.6	-1.5	-1.5	-1.5	-1.4	-0.8	-0.9	-0.9	-0.7	-0.5	-0.5	-0.3	0
XZ009	申扎县	2019-12-20 16:00:00	1.8	-0.2	-1.2	-2	-2.4	-2.8	-3.2	-3.5	-3.4	-3.4	-3.4	-3.3	-3.2	-2.7	-2.7	-2.4	-2.5	-2.1	-1.9	-1.6	-1.6	-1.5	-1.5	-1.4	-0.8	-0.9	-0.9	-0.6	-0.5	-0.5	-0.3	0
XZ009	申扎县	2019-12-20 18:00:00	0.8	0	-0.7	-1.3	-1.7	-2.1	-2.5	-2.8	-2.9	-2.9	-2.9	-2.9	-2.9	-2.6	-2.6	-2.4	-2.4	-2	-1.9	-1.6	-1.6	-1.6	-1.5	-1.4	-0.8	-0.9	-0.9	-0.7	-0.5	-0.5	-0.3	0
XZ009	申扎县	2019-12-20 19:00:00	-0.4	-0.5	-0.8	-1.2	-1.5	-1.9	-2.2	-2.6	-2.7	-2.8	-2.8	-2.8	-2.7	-2.5	-2.5	-2.4	-2.4	-2	-1.9	-1.6	-1.6	-1.5	-1.5	-1.4	-0.8	-0.9	-0.9	-0.7	-0.5	-0.5	-0.3	0
XZ009	申扎县	2019-12-20 21:00:00	-2.4	-1.8	-1.6	-1.6	-1.6	-1.7	-2	-2.4	-2.4	-2.4	-2.4	-2.5	-2.5	-2.4	-2.4	-2.2	-2.3	-2	-1.8	-1.5	-1.5	-1.5	-1.5	-1.4	-0.8	-0.9	-0.9	-0.7	-0.5	-0.5	-0.3	0
XZ009	申扎县	2019-12-20 22:00:00	-2.9	-2.3	-2	-2	-1.8	-1.9	-2	-2.3	-2.4	-2.4	-2.4	-2.4	-2.4	-2.2	-2.3	-2.2	-2.2	-1.9	-1.7	-1.5	-1.5	-1.5	-1.5	-1.4	-0.8	-0.9	-0.9	-0.7	-0.5	-0.5	-0.3	0
XZ009	申扎县	2019-12-21 00:00:00	-4.6	-3.5	-3	-2.7	-2.4	-2.2	-2.2	-2.4	-2.3	-2.3	-2.3	-2.3	-2.2	-2.2	-2.2	-2	-2.2	-1.9	-1.7	-1.4	-1.5	-1.5	-1.5	-1.4	-0.8	-0.9	-0.9	-0.7	-0.5	-0.5	-0.4	-0.1
XZ009	申扎县	2019-12-21 01:00:00	-4.7	-3.9	-3.4	-3.1	-2.7	-2.5	-2.4	-2.5	-2.4	-2.3	-2.3	-2.3	-2.2	-2.1	-2.1	-2	-2.1	-1.8	-1.7	-1.4	-1.5	-1.5	-1.4	-1.4	-0.8	-0.9	-0.9	-0.7	-0.5	-0.5	-0.3	-0.1
XZ009	申扎县	2019-12-21 02:00:00	-5.3	-4.4	-3.8	-3.4	-2.9	-2.7	-2.5	-2.5	-2.5	-2.4	-2.4	-2.3	-2.2	-2	-2	-2	-2	-1.7	-1.6	-1.4	-1.5	-1.4	-1.4	-1.3	-0.8	-0.9	-0.9	-0.7	-0.5	-0.5	-0.3	-0.1
XZ009	申扎县	2019-12-21 03:00:00	-6	-4.9	-4.2	-3.8	-3.2	-2.9	-2.7	-2.7	-2.5	-2.4	-2.4	-2.3	-2.2	-2	-2	-1.9	-2	-1.7	-1.6	-1.4	-1.4	-1.4	-1.4	-1.3	-0.8	-0.9	-0.8	-0.7	-0.5	-0.5	-0.4	0
XZ009	申扎县	2019-12-21 04:00:00	-6.3	-5.2	-4.6	-4.2	-3.5	-3.2	-2.9	-2.9	-2.7	-2.5	-2.5	-2.4	-2.2	-2	-2	-1.9	-2	-1.7	-1.5	-1.4	-1.4	-1.4	-1.4	-1.3	-0.7	-0.9	-0.9	-0.7	-0.5	-0.5	-0.4	0
XZ009	申扎县	2019-12-21 05:00:00	-6.8	-5.5	-4.9	-4.4	-3.8	-3.4	-3.1	-3	-2.8	-2.6	-2.6	-2.4	-2.3	-2	-2	-1.9	-2	-1.7	-1.5	-1.3	-1.4	-1.4	-1.4	-1.3	-0.7	-0.9	-0.8	-0.7	-0.5	-0.5	-0.4	0
XZ009	申扎县	2019-12-21 06:00:00	-6.9	-5.9	-5.3	-4.7	-4	-3.6	-3.3	-3.2	-2.9	-2.7	-2.7	-2.5	-2.4	-2	-2	-1.9	-2	-1.7	-1.5	-1.3	-1.4	-1.4	-1.4	-1.2	-0.7	-0.9	-0.8	-0.7	-0.5	-0.5	-0.3	0
XZ009	申扎县	2019-12-21 07:00:00	-7	-6	-5.5	-5	-4.3	-3.9	-3.5	-3.4	-3.1	-2.8	-2.8	-2.6	-2.4	-2.1	-2	-1.9	-2	-1.7	-1.5	-1.3	-1.4	-1.4	-1.4	-1.2	-0.7	-0.9	-0.8	-0.6	-0.5	-0.5	-0.4	-0.1
XZ009	申扎县	2019-12-21 08:00:00	-7.1	-6.2	-5.7	-5.2	-4.5	-4	-3.7	-3.5	-3.2	-2.9	-2.9	-2.7	-2.5	-2.1	-2	-1.9	-2	-1.7	-1.5	-1.3	-1.4	-1.4	-1.4	-1.2	-0.7	-0.9	-0.8	-0.6	-0.5	-0.5	-0.4	-0.1
XZ009	申扎县	2019-12-21 09:00:00	-7.5	-6.6	-6	-5.5	-4.8	-4.3	-3.9	-3.7	-3.4	-3.1	-3.1	-2.9	-2.6	-2.2	-2.1	-1.9	-2	-1.7	-1.5	-1.3	-1.4	-1.3	-1.3	-1.2	-0.7	-0.9	-0.8	-0.6	-0.5	-0.5	-0.4	-0.1
XZ009	申扎县	2019-12-21 10:00:00	-7.2	-6.5	-6	-5.5	-4.9	-4.4	-4	-3.8	-3.5	-3.1	-3.1	-2.9	-2.6	-2.2	-2.1	-2	-2	-1.7	-1.5	-1.2	-1.3	-1.4	-1.3	-1.2	-0.7	-0.8	-0.8	-0.6	-0.5	-0.5	-0.4	-0.1
XZ009	申扎县	2019-12-21 11:00:00	-5.2	-5.8	-5.8	-5.5	-4.9	-4.5	-4.1	-3.9	-3.6	-3.2	-3.2	-3	-2.7	-2.2	-2.2	-2	-2	-1.7	-1.5	-1.3	-1.3	-1.4	-1.3	-1.2	-0.7	-0.8	-0.8	-0.6	-0.5	-0.5	-0.3	0
XZ009	申扎县	2019-12-21 12:00:00	-3	-4.4	-4.9	-4.9	-4.7	-4.4	-4.1	-4	-3.7	-3.3	-3.3	-3.1	-2.8	-2.3	-2.2	-2	-2	-1.7	-1.5	-1.3	-1.4	-1.4	-1.3	-1.2	-0.7	-0.8	-0.8	-0.6	-0.5	-0.5	-0.3	-0.1
XZ009	申扎县	2019-12-21 13:00:00	-1.1	-3	-3.7	-4.1	-4	-4	-4	-3.9	-3.7	-3.4	-3.4	-3.1	-2.9	-2.4	-2.2	-2	-2.1	-1.7	-1.5	-1.3	-1.4	-1.4	-1.3	-1.2	-0.7	-0.8	-0.8	-0.6	-0.5	-0.5	-0.3	-0.1
XZ009	申扎县	2019-12-21 14:00:00	0.1	-1.7	-2.7	-3.2	-3.4	-3.5	-3.6	-3.7	-3.5	-3.3	-3.3	-3.1	-2.9	-2.4	-2.3	-2.1	-2.1	-1.7	-1.5	-1.3	-1.4	-1.4	-1.3	-1.2	-0.7	-0.8	-0.8	-0.6	-0.5	-0.5	-0.3	0
XZ009	申扎县	2019-12-21 15:00:00	1.2	-0.8	-1.8	-2.5	-2.7	-3	-3.3	-3.4	-3.4	-3.2	-3.2	-3	-2.9	-2.4	-2.4	-2.1	-2.1	-1.8	-1.6	-1.4	-1.4	-1.4	-1.4	-1.2	-0.7	-0.9	-0.8	-0.6	-0.5	-0.5	-0.3	-0.1
XZ009	申扎县	2019-12-21 16:00:00	1.8	-0.1	-1.2	-1.9	-2.2	-2.6	-2.9	-3.2	-3.2	-3	-3	-2.9	-2.7	-2.4	-2.3	-2.2	-2.1	-1.8	-1.6	-1.4	-1.4	-1.4	-1.4	-1.2	-0.7	-0.8	-0.8	-0.6	-0.5	-0.5	-0.4	0
XZ009	申扎县	2019-12-21 17:00:00	2	0	-0.7	-1.4	-1.8	-2.2	-2.5	-2.9	-2.9	-2.9	-2.9	-2.8	-2.7	-2.4	-2.3	-2.1	-2.1	-1.8	-1.6	-1.4	-1.4	-1.4	-1.4	-1.2	-0.7	-0.9	-0.8	-0.6	-0.5	-0.5	-0.4	0
XZ009	申扎县	2019-12-21 18:00:00	1.4	0.1	-0.5	-1.1	-1.5	-1.9	-2.3	-2.6	-2.7	-2.7	-2.7	-2.6	-2.5	-2.3	-2.3	-2.1	-2.1	-1.8	-1.6	-1.4	-1.4	-1.4	-1.4	-1.2	-0.7	-0.9	-0.8	-0.6	-0.5	-0.5	-0.4	-0.1
XZ009	申扎县	2019-12-21 19:00:00	0.1	0	-0.5	-1	-1.3	-1.6	-2	-2.4	-2.5	-2.5	-2.5	-2.5	-2.4	-2.2	-2.2	-2	-2.1	-1.8	-1.6	-1.4	-1.4	-1.4	-1.4	-1.2	-0.7	-0.9	-0.8	-0.6	-0.5	-0.5	-0.3	-0.1
XZ009	申扎县	2019-12-21 20:00:00	-1.5	-0.9	-0.8	-1	-1.2	-1.5	-1.9	-2.2	-2.3	-2.3	-2.3	-2.3	-2.4	-2.2	-2.2	-2	-2.1	-1.8	-1.6	-1.4	-1.4	-1.4	-1.4	-1.2	-0.7	-0.9	-0.8	-0.6	-0.5	-0.5	-0.4	-0.1
XZ009	申扎县	2019-12-21 21:00:00	-2.7	-1.6	-1.4	-1.4	-1.3	-1.5	-1.7	-2	-2.2	-2.2	-2.2	-2.2	-2.2	-2.1	-2.1	-2	-2	-1.7	-1.5	-1.4	-1.4	-1.4	-1.4	-1.2	-0.7	-0.9	-0.8	-0.6	-0.5	-0.5	-0.4	0
XZ009	申扎县	2019-12-21 22:00:00	-4.1	-2.7	-2	-1.8	-1.6	-1.6	-1.7	-2	-2	-2.1	-2.1	-2.1	-2.1	-2	-2	-1.9	-2	-1.7	-1.5	-1.3	-1.4	-1.4	-1.4	-1.2	-0.7	-0.9	-0.8	-0.6	-0.5	-0.5	-0.4	-0.1
XZ009	申扎县	2019-12-21 23:00:00	-5.1	-3.5	-2.8	-2.4	-2	-1.9	-1.9	-2	-2	-2	-2	-2	-2	-1.9	-2	-1.9	-2	-1.7	-1.5	-1.3	-1.4	-1.4	-1.4	-1.2	-0.7	-0.9	-0.8	-0.6	-0.5	-0.5	-0.3	-0.1
XZ009	申扎县	2019-12-22 00:00:00	-5.7	-4.2	-3.4	-2.9	-2.4	-2.2	-2	-2.2	-2.1	-2	-2	-2	-2	-1.9	-1.9	-1.9	-1.9	-1.7	-1.5	-1.3	-1.4	-1.4	-1.4	-1.2	-0.7	-0.9	-0.8	-0.6	-0.5	-0.5	-0.4	-0.1
XZ009	申扎县	2019-12-22 01:00:00	-6.4	-4.8	-4	-3.4	-2.9	-2.5	-2.3	-2.3	-2.2	-2.1	-2.1	-2	-2	-1.9	-1.9	-1.8	-1.9	-1.6	-1.5	-1.2	-1.3	-1.3	-1.3	-1.2	-0.7	-0.8	-0.8	-0.6	-0.5	-0.5	-0.3	0
XZ009	申扎县	2019-12-22 02:00:00	-6.7	-5.3	-4.5	-3.9	-3.2	-2.8	-2.5	-2.5	-2.4	-2.2	-2.2	-2.1	-2	-1.9	-1.9	-1.7	-1.9	-1.5	-1.4	-1.2	-1.3	-1.3	-1.3	-1.2	-0.7	-0.8	-0.7	-0.6	-0.5	-0.5	-0.4	-0.1
XZ009	申扎县	2019-12-22 03:00:00	-7.3	-5.8	-5	-4.3	-3.6	-3.1	-2.9	-2.7	-2.5	-2.3	-2.3	-2.2	-2	-1.9	-1.9	-1.7	-1.9	-1.5	-1.4	-1.2	-1.3	-1.3	-1.3	-1.2	-0.7	-0.9	-0.8	-0.6	-0.5	-0.5	-0.4	-0.1
XZ009	申扎县	2019-12-22 04:00:00	-8.2	-6.4	-5.5	-4.7	-4	-3.4	-3.1	-2.9	-2.7	-2.4	-2.4	-2.2	-2.1	-1.9	-1.9	-1.7	-1.8	-1.5	-1.4	-1.2	-1.2	-1.2	-1.3	-1.2	-0.7	-0.8	-0.8	-0.6	-0.5	-0.5	-0.4	-0.1
XZ009	申扎县	2019-12-22 05:00:00	-9.2	-7.1	-6	-5.2	-4.4	-3.7	-3.4	-3.2	-2.9	-2.5	-2.5	-2.4	-2.2	-1.9	-1.9	-1.7	-1.8	-1.5	-1.4	-1.2	-1.2	-1.2	-1.3	-1.2	-0.7	-0.8	-0.8	-0.6	-0.5	-0.5	-0.4	-0.1
XZ009	申扎县	2019-12-22 06:00:00	-10	-7.8	-6.7	-5.8	-4.8	-4.1	-3.6	-3.4	-3	-2.7	-2.7	-2.5	-2.2	-1.9	-1.9	-1.7	-1.8	-1.5	-1.4	-1.2	-1.2	-1.2	-1.2	-1.2	-0.6	-0.8	-0.8	-0.6	-0.5	-0.5	-0.4	-0.1
XZ009	申扎县	2019-12-22 07:00:00	-10.5	-8.4	-7.2	-6.3	-5.2	-4.5	-3.9	-3.6	-3.3	-2.9	-2.9	-2.6	-2.4	-2	-1.9	-1.8	-1.8	-1.5	-1.4	-1.1	-1.2	-1.2	-1.2	-1.2	-0.6	-0.8	-0.7	-0.6	-0.5	-0.5	-0.4	-0.1
XZ009	申扎县	2019-12-22 08:00:00	-11	-8.9	-7.7	-6.8	-5.7	-4.9	-4.2	-3.9	-3.5	-3	-3	-2.8	-2.5	-2	-2	-1.8	-1.9	-1.5	-1.4	-1.2	-1.2	-1.2	-1.2	-1.2	-0.7	-0.8	-0.7	-0.6	-0.5	-0.5	-0.4	-0.1
XZ009	申扎县	2019-12-22 09:00:00	-11.5	-9.4	-8.2	-7.2	-6	-5.2	-4.5	-4.2	-3.7	-3.2	-3.2	-2.9	-2.6	-2.1	-2	-1.9	-1.9	-1.5	-1.4	-1.2	-1.2	-1.2	-1.2	-1.1	-0.7	-0.8	-0.7	-0.6	-0.5	-0.5	-0.4	-0.1
XZ009	申扎县	2019-12-22 10:00:00	-11	-9.7	-8.5	-7.6	-6.4	-5.5	-4.9	-4.4	-3.9	-3.5	-3.5	-3.1	-2.8	-2.2	-2.1	-1.9	-1.9	-1.5	-1.4	-1.2	-1.2	-1.2	-1.2	-1.1	-0.6	-0.8	-0.7	-0.5	-0.5	-0.5	-0.4	-0.1
XZ009	申扎县	2019-12-22 11:00:00	-8.3	-8.5	-8.2	-7.5	-6.6	-5.7	-5.1	-4.7	-4.2	-3.7	-3.7	-3.3	-2.9	-2.3	-2.2	-2	-2	-1.6	-1.4	-1.2	-1.2	-1.2	-1.2	-1.1	-0.6	-0.7	-0.7	-0.5	-0.5	-0.5	-0.4	0
XZ009	申扎县	2019-12-22 12:00:00	-5.4	-6.7	-7	-6.9	-6.3	-5.7	-5.2	-4.9	-4.4	-3.9	-3.9	-3.5	-3	-2.4	-2.2	-2	-2	-1.7	-1.5	-1.2	-1.2	-1.2	-1.2	-1.1	-0.6	-0.7	-0.7	-0.6	-0.5	-0.5	-0.4	-0.1
XZ009	申扎县	2019-12-22 13:00:00	-2.9	-4.8	-5.5	-5.8	-5.6	-5.4	-5	-4.9	-4.4	-4	-4	-3.5	-3.2	-2.5	-2.4	-2.1	-2	-1.7	-1.5	-1.2	-1.3	-1.2	-1.2	-1.1	-0.6	-0.8	-0.7	-0.6	-0.5	-0.5	-0.4	-0.1
XZ009	申扎县	2019-12-22 14:00:00	-1	-3.2	-4.1	-4.6	-4.7	-4.7	-4.7	-4.6	-4.4	-4	-4	-3.6	-3.3	-2.6	-2.4	-2.2	-2.1	-1.7	-1.5	-1.3	-1.3	-1.3	-1.2	-1.2	-0.6	-0.7	-0.7	-0.6	-0.5	-0.5	-0.3	-0.1
XZ009	申扎县	2019-12-22 15:00:00	0	-1.9	-2.9	-3.6	-3.9	-4.1	-4.2	-4.3	-4.1	-3.9	-3.9	-3.6	-3.3	-2.7	-2.5	-2.2	-2.2	-1.8	-1.6	-1.3	-1.4	-1.3	-1.3	-1.2	-0.7	-0.8	-0.7	-0.6	-0.5	-0.5	-0.3	-0.1
XZ009	申扎县	2019-12-22 16:00:00	0.5	-1.2	-2.1	-2.8	-3.2	-3.5	-3.8	-3.9	-3.9	-3.7	-3.7	-3.5	-3.2	-2.7	-2.5	-2.3	-2.2	-1.9	-1.6	-1.4	-1.4	-1.3	-1.3	-1.2	-0.7	-0.8	-0.7	-0.6	-0.5	-0.5	-0.4	-0.1
XZ009	申扎县	2019-12-22 17:00:00	0.3	-0.9	-1.7	-2.3	-2.6	-3	-3.3	-3.5	-3.5	-3.4	-3.4	-3.3	-3.1	-2.7	-2.5	-2.3	-2.2	-1.9	-1.7	-1.4	-1.4	-1.4	-1.4	-1.2	-0.7	-0.8	-0.7	-0.6	-0.5	-0.5	-0.3	-0.1
XZ009	申扎县	2019-12-22 18:00:00	-0.2	-0.9	-1.5	-2	-2.2	-2.7	-3	-3.2	-3.3	-3.2	-3.2	-3.1	-3	-2.6	-2.5	-2.3	-2.3	-1.9	-1.7	-1.4	-1.4	-1.4	-1.4	-1.2	-0.7	-0.8	-0.8	-0.6	-0.5	-0.5	-0.3	-0.1
XZ009	申扎县	2019-12-22 19:00:00	-1.6	-1.5	-1.6	-1.9	-2.1	-2.4	-2.7	-3	-3	-3	-3	-3	-2.9	-2.5	-2.5	-2.3	-2.2	-1.9	-1.7	-1.4	-1.5	-1.4	-1.4	-1.2	-0.7	-0.8	-0.8	-0.6	-0.5	-0.5	-0.4	-0.1
XZ009	申扎县	2019-12-22 20:00:00	-3.6	-2.5	-2.2	-2.2	-2.2	-2.3	-2.5	-2.8	-2.9	-2.9	-2.9	-2.8	-2.7	-2.5	-2.4	-2.2	-2.3	-1.9	-1.7	-1.4	-1.5	-1.4	-1.4	-1.3	-0.7	-0.9	-0.8	-0.6	-0.5	-0.5	-0.3	-0.1
XZ009	申扎县	2019-12-22 21:00:00	-5.4	-3.7	-3.1	-2.8	-2.5	-2.4	-2.5	-2.7	-2.8	-2.7	-2.7	-2.7	-2.6	-2.4	-2.4	-2.2	-2.2	-1.9	-1.7	-1.4	-1.5	-1.4	-1.4	-1.3	-0.7	-0.9	-0.8	-0.6	-0.5	-0.5	-0.4	-0.1
XZ009	申扎县	2019-12-22 22:00:00	-7.1	-5	-4.1	-3.5	-3	-2.7	-2.7	-2.8	-2.7	-2.7	-2.7	-2.6	-2.5	-2.4	-2.3	-2.2	-2.2	-1.9	-1.7	-1.4	-1.4	-1.4	-1.4	-1.3	-0.7	-0.9	-0.8	-0.7	-0.5	-0.5	-0.4	-0.1
XZ009	申扎县	2019-12-22 23:00:00	-8.2	-6	-5	-4.3	-3.5	-3.2	-3	-2.9	-2.8	-2.7	-2.7	-2.6	-2.5	-2.3	-2.3	-2.1	-2.2	-1.9	-1.7	-1.4	-1.4	-1.4	-1.4	-1.3	-0.7	-0.9	-0.8	-0.7	-0.5	-0.5	-0.4	-0.1
XZ009	申扎县	2019-12-23 00:00:00	-9.1	-6.9	-5.8	-5	-4.1	-3.6	-3.3	-3.2	-3	-2.7	-2.7	-2.6	-2.5	-2.2	-2.2	-2.1	-2.2	-1.8	-1.7	-1.4	-1.4	-1.4	-1.4	-1.3	-0.7	-0.9	-0.9	-0.7	-0.5	-0.5	-0.4	-0.2
XZ009	申扎县	2019-12-23 01:00:00	-9.9	-7.6	-6.5	-5.6	-4.7	-4	-3.6	-3.4	-3.2	-2.9	-2.9	-2.7	-2.5	-2.2	-2.2	-2	-2.1	-1.8	-1.6	-1.4	-1.4	-1.4	-1.4	-1.3	-0.7	-0.9	-0.9	-0.7	-0.5	-0.5	-0.4	-0.1
XZ009	申扎县	2019-12-23 02:00:00	-10.4	-8.2	-7.1	-6.2	-5.2	-4.5	-4	-3.7	-3.4	-3	-3	-2.9	-2.6	-2.3	-2.2	-2	-2.1	-1.8	-1.6	-1.4	-1.4	-1.4	-1.4	-1.3	-0.7	-0.9	-0.9	-0.7	-0.5	-0.5	-0.4	-0.2
XZ009	申扎县	2019-12-23 03:00:00	-11.1	-8.9	-7.7	-6.7	-5.6	-4.9	-4.3	-4	-3.6	-3.2	-3.2	-3	-2.7	-2.3	-2.2	-2	-2.1	-1.8	-1.6	-1.4	-1.4	-1.4	-1.4	-1.3	-0.7	-0.9	-0.8	-0.7	-0.5	-0.5	-0.4	-0.1
XZ009	申扎县	2019-12-23 04:00:00	-11.9	-9.5	-8.2	-7.2	-6.1	-5.2	-4.6	-4.3	-3.9	-3.4	-3.4	-3.1	-2.8	-2.4	-2.3	-2.1	-2.1	-1.8	-1.6	-1.4	-1.4	-1.4	-1.4	-1.2	-0.7	-0.9	-0.9	-0.7	-0.5	-0.5	-0.4	-0.1
XZ009	申扎县	2019-12-23 05:00:00	-12.1	-10	-8.8	-7.7	-6.5	-5.6	-5	-4.5	-4	-3.6	-3.6	-3.3	-3	-2.4	-2.4	-2.1	-2.1	-1.8	-1.6	-1.4	-1.4	-1.4	-1.4	-1.2	-0.7	-0.9	-0.9	-0.7	-0.5	-0.5	-0.4	-0.2
XZ009	申扎县	2019-12-23 06:00:00	-12.4	-10.4	-9.2	-8.1	-6.9	-6	-5.3	-4.9	-4.4	-3.9	-3.9	-3.5	-3.1	-2.5	-2.4	-2.2	-2.2	-1.8	-1.6	-1.4	-1.4	-1.4	-1.4	-1.3	-0.7	-0.9	-0.9	-0.7	-0.5	-0.5	-0.4	-0.1
XZ009	申扎县	2019-12-23 07:00:00	-13	-10.9	-9.6	-8.5	-7.3	-6.3	-5.5	-5.1	-4.6	-4	-4	-3.7	-3.2	-2.6	-2.5	-2.2	-2.2	-1.9	-1.7	-1.4	-1.4	-1.4	-1.4	-1.3	-0.7	-0.9	-0.9	-0.7	-0.5	-0.5	-0.4	-0.2
XZ009	申扎县	2019-12-23 08:00:00	-13.5	-11.3	-10	-8.9	-7.7	-6.7	-5.9	-5.4	-4.9	-4.3	-4.3	-3.9	-3.4	-2.7	-2.5	-2.3	-2.3	-1.9	-1.7	-1.4	-1.5	-1.4	-1.4	-1.3	-0.7	-0.9	-0.9	-0.7	-0.5	-0.6	-0.4	-0.2
XZ009	申扎县	2019-12-23 09:00:00	-14.1	-11.8	-10.5	-9.4	-8	-7	-6.2	-5.7	-5	-4.5	-4.5	-4	-3.6	-2.9	-2.6	-2.4	-2.3	-2	-1.7	-1.4	-1.5	-1.4	-1.4	-1.3	-0.7	-0.9	-0.9	-0.7	-0.5	-0.6	-0.4	-0.2
XZ009	申扎县	2019-12-23 10:00:00	-13.9	-12.2	-10.9	-9.7	-8.4	-7.3	-6.5	-5.9	-5.3	-4.7	-4.7	-4.2	-3.7	-3	-2.7	-2.5	-2.4	-2	-1.8	-1.5	-1.5	-1.5	-1.4	-1.3	-0.8	-0.9	-0.9	-0.7	-0.5	-0.6	-0.4	-0.2
XZ009	申扎县	2019-12-23 11:00:00	-10.8	-11	-10.5	-9.7	-8.5	-7.5	-6.7	-6.2	-5.5	-4.9	-4.9	-4.4	-3.9	-3	-2.9	-2.5	-2.4	-2	-1.9	-1.5	-1.5	-1.5	-1.5	-1.3	-0.8	-0.9	-0.9	-0.7	-0.5	-0.6	-0.4	-0.2
XZ009	申扎县	2019-12-23 12:00:00	-6.9	-8.7	-9	-8.9	-8.2	-7.5	-6.9	-6.4	-5.7	-5.1	-5.1	-4.6	-4.1	-3.2	-3	-2.6	-2.5	-2.1	-1.9	-1.5	-1.5	-1.5	-1.5	-1.4	-0.8	-0.9	-0.9	-0.7	-0.5	-0.6	-0.4	-0.2
XZ009	申扎县	2019-12-23 14:00:00	-1.7	-4.2	-5.4	-6	-6.2	-6.2	-6.2	-6	-5.7	-5.2	-5.2	-4.8	-4.3	-3.5	-3.2	-2.9	-2.7	-2.3	-2	-1.7	-1.7	-1.6	-1.5	-1.4	-0.9	-1	-0.9	-0.7	-0.6	-0.6	-0.4	-0.2
XZ009	申扎县	2019-12-23 15:00:00	-0.2	-2.8	-4	-4.8	-5.2	-5.5	-5.6	-5.6	-5.4	-5	-5	-4.7	-4.3	-3.5	-3.2	-2.9	-2.8	-2.4	-2	-1.7	-1.7	-1.6	-1.6	-1.4	-0.9	-0.9	-0.9	-0.7	-0.5	-0.6	-0.4	-0.2
XZ009	申扎县	2019-12-23 16:00:00	0.1	-1.8	-3	-3.8	-4.3	-4.7	-5	-5.2	-5	-4.8	-4.8	-4.6	-4.2	-3.5	-3.3	-3	-2.9	-2.4	-2.1	-1.8	-1.8	-1.7	-1.6	-1.4	-0.9	-1	-0.9	-0.7	-0.6	-0.6	-0.4	-0.2
XZ009	申扎县	2019-12-23 17:00:00	0.2	-1.4	-2.3	-3.1	-3.6	-4	-4.4	-4.7	-4.7	-4.5	-4.5	-4.4	-4.1	-3.5	-3.3	-3	-2.9	-2.5	-2.2	-1.9	-1.8	-1.7	-1.7	-1.5	-0.9	-1	-0.9	-0.7	-0.6	-0.6	-0.4	-0.2
XZ009	申扎县	2019-12-23 18:00:00	-0.3	-1.3	-2	-2.7	-3.1	-3.5	-4	-4.3	-4.4	-4.2	-4.2	-4.1	-3.9	-3.5	-3.3	-3	-2.9	-2.5	-2.2	-1.9	-1.8	-1.7	-1.7	-1.5	-0.9	-1	-0.9	-0.7	-0.6	-0.6	-0.4	-0.2
XZ009	申扎县	2019-12-23 19:00:00	-1.9	-1.9	-2.2	-2.6	-2.9	-3.2	-3.6	-3.9	-4	-4	-4	-3.9	-3.8	-3.4	-3.2	-3	-2.9	-2.5	-2.2	-1.9	-1.9	-1.8	-1.7	-1.5	-0.9	-1	-1	-0.7	-0.6	-0.6	-0.4	-0.2
XZ009	申扎县	2019-12-23 20:00:00	-4.4	-3.2	-2.9	-2.9	-2.9	-3.1	-3.4	-3.7	-3.8	-3.7	-3.7	-3.7	-3.6	-3.2	-3.2	-2.9	-2.9	-2.5	-2.2	-1.9	-1.9	-1.8	-1.7	-1.5	-1	-1	-1	-0.7	-0.6	-0.7	-0.4	-0.2
XZ009	申扎县	2019-12-23 21:00:00	-6.4	-4.7	-4	-3.7	-3.3	-3.3	-3.4	-3.6	-3.6	-3.5	-3.5	-3.5	-3.4	-3.2	-3.1	-2.9	-2.9	-2.5	-2.2	-1.9	-1.9	-1.8	-1.7	-1.5	-1	-1	-1	-0.8	-0.6	-0.6	-0.4	-0.2
XZ009	申扎县	2019-12-23 22:00:00	-8	-5.9	-5	-4.4	-3.9	-3.6	-3.5	-3.7	-3.6	-3.5	-3.5	-3.4	-3.4	-3	-3	-2.8	-2.8	-2.4	-2.2	-1.9	-1.9	-1.8	-1.7	-1.5	-1	-1	-1	-0.8	-0.6	-0.7	-0.5	-0.2
XZ009	申扎县	2019-12-23 23:00:00	-9.2	-7	-5.9	-5.2	-4.5	-4	-3.9	-3.8	-3.7	-3.5	-3.5	-3.4	-3.3	-3	-2.9	-2.7	-2.7	-2.4	-2.2	-1.9	-1.9	-1.8	-1.7	-1.6	-1	-1.1	-1	-0.8	-0.7	-0.7	-0.5	-0.2
XZ009	申扎县	2019-12-24 00:00:00	-9.9	-7.8	-6.7	-5.9	-5	-4.5	-4.2	-4	-3.8	-3.5	-3.5	-3.4	-3.2	-2.9	-2.9	-2.7	-2.7	-2.4	-2.2	-1.9	-1.9	-1.8	-1.7	-1.6	-1	-1	-1	-0.8	-0.7	-0.7	-0.5	-0.2
XZ009	申扎县	2019-12-24 01:00:00	-10.7	-8.5	-7.4	-6.5	-5.5	-4.9	-4.5	-4.3	-4	-3.7	-3.7	-3.5	-3.3	-2.9	-2.9	-2.7	-2.7	-2.4	-2.2	-1.9	-1.9	-1.8	-1.7	-1.6	-1	-1.1	-1	-0.8	-0.7	-0.7	-0.5	-0.2
XZ009	申扎县	2019-12-24 02:00:00	-11.4	-9.2	-8	-7.1	-6	-5.4	-4.9	-4.5	-4.2	-3.9	-3.9	-3.6	-3.4	-2.9	-2.9	-2.7	-2.7	-2.3	-2.1	-1.9	-1.8	-1.8	-1.7	-1.5	-1	-1.1	-1	-0.9	-0.7	-0.7	-0.5	-0.2
XZ009	申扎县	2019-12-24 03:00:00	-11.9	-9.7	-8.5	-7.6	-6.5	-5.7	-5.2	-4.9	-4.4	-4	-4	-3.7	-3.5	-3	-2.9	-2.7	-2.7	-2.3	-2.1	-1.9	-1.9	-1.8	-1.7	-1.5	-1	-1.1	-1	-0.9	-0.7	-0.7	-0.5	-0.2
XZ009	申扎县	2019-12-24 04:00:00	-11.4	-9.8	-8.9	-8	-6.9	-6.1	-5.5	-5.1	-4.7	-4.2	-4.2	-3.9	-3.5	-3	-2.9	-2.7	-2.7	-2.3	-2.1	-1.9	-1.8	-1.8	-1.7	-1.5	-1	-1.1	-1	-0.9	-0.7	-0.7	-0.5	-0.2
XZ009	申扎县	2019-12-24 05:00:00	-11.9	-10	-9.1	-8.2	-7.2	-6.4	-5.7	-5.4	-4.9	-4.4	-4.4	-4	-3.7	-3	-2.9	-2.7	-2.7	-2.3	-2.1	-1.8	-1.8	-1.8	-1.7	-1.6	-1	-1.1	-1	-0.9	-0.7	-0.7	-0.5	-0.2
XZ009	申扎县	2019-12-24 06:00:00	-12.6	-10.5	-9.5	-8.5	-7.5	-6.6	-6	-5.5	-5.1	-4.6	-4.6	-4.2	-3.9	-3.2	-3	-2.7	-2.7	-2.4	-2.1	-1.9	-1.8	-1.8	-1.7	-1.5	-1	-1.1	-1	-0.9	-0.7	-0.7	-0.5	-0.2
XZ009	申扎县	2019-12-24 07:00:00	-13.2	-11.1	-9.9	-8.9	-7.8	-6.9	-6.2	-5.8	-5.3	-4.7	-4.7	-4.4	-4	-3.3	-3.1	-2.8	-2.7	-2.4	-2.1	-1.9	-1.9	-1.8	-1.7	-1.6	-1	-1.1	-1	-0.9	-0.7	-0.7	-0.5	-0.2
XZ009	申扎县	2019-12-24 08:00:00	-13.4	-11.5	-10.4	-9.4	-8.1	-7.2	-6.5	-6	-5.5	-4.9	-4.9	-4.5	-4.1	-3.4	-3.2	-2.9	-2.8	-2.4	-2.2	-1.9	-1.9	-1.8	-1.7	-1.6	-1	-1.1	-1	-0.9	-0.7	-0.7	-0.5	-0.2
XZ009	申扎县	2019-12-24 09:00:00	-13.4	-11.7	-10.6	-9.6	-8.4	-7.5	-6.7	-6.3	-5.7	-5.1	-5.1	-4.7	-4.2	-3.5	-3.2	-3	-2.9	-2.5	-2.2	-1.9	-1.9	-1.8	-1.7	-1.6	-1	-1.1	-1	-0.9	-0.7	-0.7	-0.5	-0.3
XZ009	申扎县	2019-12-24 10:00:00	-13	-11.7	-10.7	-9.8	-8.7	-7.7	-7	-6.5	-5.9	-5.3	-5.3	-4.9	-4.4	-3.5	-3.4	-3	-2.9	-2.5	-2.2	-2	-1.9	-1.9	-1.8	-1.6	-1	-1.2	-1	-0.9	-0.7	-0.7	-0.5	-0.2
XZ009	申扎县	2019-12-24 11:00:00	-10.4	-10.5	-10.2	-9.7	-8.7	-7.9	-7.2	-6.7	-6.1	-5.5	-5.5	-5	-4.5	-3.7	-3.4	-3.1	-3	-2.5	-2.3	-2	-1.9	-1.9	-1.8	-1.6	-1	-1.2	-1	-0.9	-0.7	-0.7	-0.5	-0.3
XZ009	申扎县	2019-12-24 12:00:00	-6.6	-8.5	-9	-8.9	-8.3	-7.7	-7.2	-6.7	-6.2	-5.6	-5.6	-5.2	-4.7	-3.8	-3.5	-3.2	-3	-2.6	-2.4	-2	-2	-1.9	-1.8	-1.7	-1	-1.2	-1.1	-0.9	-0.7	-0.7	-0.5	-0.3
XZ009	申扎县	2019-12-24 13:00:00	-3.5	-6	-7	-7.5	-7.4	-7.2	-6.9	-6.7	-6.2	-5.7	-5.7	-5.2	-4.8	-3.9	-3.6	-3.2	-3.1	-2.7	-2.4	-2	-2	-1.9	-1.9	-1.7	-1.1	-1.2	-1.1	-0.9	-0.7	-0.8	-0.5	-0.3
XZ009	申扎县	2019-12-24 14:00:00	-1.9	-4.3	-5.4	-6.1	-6.4	-6.5	-6.4	-6.4	-6	-5.6	-5.6	-5.2	-4.8	-3.9	-3.7	-3.3	-3.2	-2.7	-2.4	-2.1	-2	-2	-1.9	-1.7	-1.1	-1.2	-1.1	-0.9	-0.7	-0.8	-0.5	-0.3
XZ009	申扎县	2019-12-24 15:00:00	-0.9	-3.1	-4.2	-5	-5.4	-5.7	-5.9	-5.9	-5.8	-5.5	-5.5	-5.2	-4.7	-4	-3.7	-3.4	-3.2	-2.7	-2.5	-2.1	-2	-2	-1.9	-1.7	-1.1	-1.2	-1.1	-0.9	-0.8	-0.8	-0.5	-0.3
XZ009	申扎县	2019-12-24 16:00:00	-0.1	-2.2	-3.3	-4.1	-4.5	-5	-5.3	-5.5	-5.4	-5.2	-5.2	-5	-4.7	-4	-3.7	-3.4	-3.2	-2.8	-2.5	-2.2	-2.1	-2	-1.9	-1.7	-1.1	-1.2	-1.1	-0.9	-0.8	-0.8	-0.5	-0.4
XZ009	申扎县	2019-12-24 17:00:00	-0.2	-1.7	-2.7	-3.4	-3.9	-4.4	-4.7	-5	-5	-4.9	-4.9	-4.7	-4.5	-3.9	-3.7	-3.4	-3.3	-2.9	-2.5	-2.2	-2.1	-2	-1.9	-1.7	-1.2	-1.2	-1.2	-0.9	-0.8	-0.8	-0.6	-0.3
XZ009	申扎县	2019-12-24 18:00:00	-0.9	-1.8	-2.4	-3	-3.4	-3.9	-4.3	-4.6	-4.7	-4.5	-4.5	-4.5	-4.3	-3.9	-3.7	-3.4	-3.3	-2.9	-2.5	-2.2	-2.2	-2	-2	-1.8	-1.2	-1.3	-1.2	-1	-0.8	-0.8	-0.6	-0.3
XZ009	申扎县	2019-12-24 19:00:00	-2.4	-2.4	-2.6	-3	-3.2	-3.5	-3.9	-4.3	-4.4	-4.3	-4.3	-4.2	-4.1	-3.7	-3.6	-3.4	-3.2	-2.9	-2.5	-2.2	-2.2	-2.1	-2	-1.8	-1.2	-1.2	-1.2	-1	-0.8	-0.8	-0.6	-0.3
XZ009	申扎县	2019-12-24 20:00:00	-4.8	-3.7	-3.3	-3.3	-3.3	-3.5	-3.7	-4	-4.1	-4.1	-4.1	-4	-3.9	-3.6	-3.5	-3.3	-3.2	-2.8	-2.5	-2.2	-2.2	-2.1	-2	-1.8	-1.2	-1.3	-1.2	-1	-0.8	-0.8	-0.6	-0.4
XZ009	申扎县	2019-12-24 21:00:00	-7	-5.2	-4.4	-4	-3.7	-3.7	-3.7	-3.9	-4	-3.9	-3.9	-3.9	-3.8	-3.5	-3.4	-3.2	-3.2	-2.8	-2.5	-2.2	-2.2	-2.1	-2	-1.9	-1.2	-1.3	-1.2	-1	-0.8	-0.8	-0.6	-0.4
XZ009	申扎县	2019-12-24 22:00:00	-8.4	-6.4	-5.4	-4.8	-4.2	-4	-3.9	-4	-3.9	-3.8	-3.8	-3.8	-3.7	-3.4	-3.4	-3.1	-3.1	-2.7	-2.5	-2.2	-2.2	-2.1	-2	-1.9	-1.2	-1.3	-1.2	-1	-0.9	-0.9	-0.7	-0.4
XZ009	申扎县	2019-12-24 23:00:00	-9.5	-7.4	-6.3	-5.6	-4.9	-4.4	-4.2	-4.2	-4	-3.9	-3.9	-3.7	-3.6	-3.3	-3.3	-3	-3	-2.7	-2.5	-2.2	-2.2	-2.1	-2	-1.9	-1.2	-1.3	-1.2	-1	-0.9	-0.9	-0.6	-0.4
XZ009	申扎县	2019-12-25 00:00:00	-9.7	-7.9	-7	-6.2	-5.4	-4.9	-4.5	-4.4	-4.2	-3.9	-3.9	-3.7	-3.6	-3.3	-3.2	-3	-3	-2.7	-2.4	-2.2	-2.2	-2.1	-2	-1.9	-1.2	-1.4	-1.2	-1	-0.9	-0.9	-0.7	-0.4
XZ009	申扎县	2019-12-25 01:00:00	-9.7	-8.2	-7.4	-6.7	-5.9	-5.2	-4.9	-4.7	-4.4	-4	-4	-3.9	-3.6	-3.2	-3.2	-3	-3	-2.6	-2.4	-2.2	-2.2	-2	-2	-1.9	-1.3	-1.4	-1.2	-1	-0.9	-0.9	-0.7	-0.4
XZ009	申扎县	2019-12-25 02:00:00	-9.9	-8.5	-7.7	-7	-6.2	-5.5	-5.1	-4.9	-4.5	-4.2	-4.2	-3.9	-3.7	-3.2	-3.2	-3	-3	-2.6	-2.4	-2.1	-2.1	-2	-2	-1.9	-1.2	-1.4	-1.3	-1	-0.9	-0.9	-0.7	-0.4
XZ009	申扎县	2019-12-25 03:00:00	-10	-8.7	-7.9	-7.3	-6.4	-5.8	-5.4	-5	-4.7	-4.3	-4.3	-4	-3.8	-3.3	-3.2	-3	-3	-2.6	-2.4	-2.1	-2.1	-2	-2	-1.9	-1.3	-1.4	-1.2	-1	-0.9	-0.9	-0.7	-0.4
XZ009	申扎县	2019-12-25 04:00:00	-10.1	-8.9	-8.2	-7.5	-6.7	-6	-5.5	-5.3	-4.9	-4.4	-4.4	-4.2	-3.9	-3.4	-3.2	-3	-3	-2.6	-2.4	-2.1	-2.1	-2	-2	-1.8	-1.2	-1.4	-1.3	-1	-0.9	-0.9	-0.7	-0.4
XZ009	申扎县	2019-12-25 05:00:00	-10.5	-9.2	-8.4	-7.7	-6.9	-6.2	-5.7	-5.5	-5	-4.6	-4.6	-4.3	-4	-3.4	-3.2	-3	-3	-2.6	-2.4	-2.1	-2.1	-2	-2	-1.9	-1.3	-1.4	-1.3	-1	-0.9	-0.9	-0.7	-0.4
XZ009	申扎县	2019-12-25 06:00:00	-11.7	-9.9	-8.9	-8.1	-7.2	-6.4	-5.9	-5.6	-5.2	-4.7	-4.7	-4.4	-4	-3.4	-3.3	-3	-3	-2.6	-2.4	-2.1	-2.1	-2	-2	-1.9	-1.2	-1.4	-1.3	-1	-0.9	-0.9	-0.7	-0.4
XZ009	申扎县	2019-12-25 07:00:00	-11.7	-10.2	-9.3	-8.5	-7.5	-6.7	-6.2	-5.8	-5.4	-4.9	-4.9	-4.5	-4.2	-3.5	-3.4	-3	-3	-2.7	-2.4	-2.1	-2.1	-2	-2	-1.9	-1.2	-1.4	-1.2	-1	-0.9	-0.9	-0.7	-0.4
XZ009	申扎县	2019-12-25 08:00:00	-11.9	-10.4	-9.5	-8.7	-7.7	-7	-6.4	-6	-5.5	-5	-5	-4.7	-4.3	-3.6	-3.4	-3.2	-3	-2.7	-2.4	-2.1	-2.1	-2.1	-2	-1.9	-1.3	-1.4	-1.3	-1.1	-0.9	-0.9	-0.7	-0.4
XZ009	申扎县	2019-12-25 09:00:00	-12.3	-10.7	-9.9	-9	-8	-7.2	-6.6	-6.2	-5.7	-5.2	-5.2	-4.8	-4.4	-3.7	-3.5	-3.2	-3.1	-2.7	-2.5	-2.2	-2.2	-2.1	-2	-1.9	-1.3	-1.4	-1.3	-1.1	-0.9	-0.9	-0.7	-0.4
XZ009	申扎县	2019-12-25 10:00:00	-12.6	-11.2	-10.2	-9.3	-8.2	-7.4	-6.8	-6.4	-5.9	-5.4	-5.4	-4.9	-4.5	-3.7	-3.5	-3.2	-3.2	-2.8	-2.5	-2.2	-2.2	-2.1	-2	-1.9	-1.3	-1.4	-1.3	-1.1	-0.9	-0.9	-0.7	-0.5
XZ009	申扎县	2019-12-25 11:00:00	-9.8	-10.2	-9.9	-9.4	-8.4	-7.6	-7	-6.5	-6.1	-5.5	-5.5	-5	-4.7	-3.9	-3.6	-3.3	-3.2	-2.8	-2.5	-2.2	-2.2	-2.1	-2	-1.9	-1.3	-1.4	-1.3	-1.1	-0.9	-0.9	-0.7	-0.5
XZ009	申扎县	2019-12-25 12:00:00	-6.1	-8.1	-8.6	-8.6	-8.1	-7.5	-7	-6.7	-6.2	-5.6	-5.6	-5.2	-4.7	-3.9	-3.7	-3.4	-3.3	-2.9	-2.6	-2.2	-2.2	-2.2	-2	-1.9	-1.3	-1.4	-1.3	-1.1	-0.9	-0.9	-0.7	-0.4
XZ009	申扎县	2019-12-25 13:00:00	-3.4	-5.9	-6.9	-7.4	-7.2	-7.1	-6.9	-6.6	-6.2	-5.7	-5.7	-5.3	-4.9	-4	-3.8	-3.4	-3.3	-2.9	-2.6	-2.3	-2.2	-2.2	-2.1	-1.9	-1.3	-1.4	-1.3	-1.1	-1	-0.9	-0.7	-0.5
XZ009	申扎县	2019-12-25 14:00:00	-1.5	-4	-5.2	-5.9	-6.2	-6.4	-6.4	-6.4	-6	-5.7	-5.7	-5.3	-4.9	-4	-3.9	-3.5	-3.4	-2.9	-2.7	-2.4	-2.3	-2.2	-2.1	-1.9	-1.4	-1.4	-1.4	-1.1	-1	-0.9	-0.7	-0.5
XZ009	申扎县	2019-12-25 15:00:00	-0.4	-2.7	-3.9	-4.8	-5.2	-5.6	-5.8	-5.9	-5.7	-5.5	-5.5	-5.2	-4.9	-4.1	-3.9	-3.5	-3.4	-3	-2.7	-2.4	-2.3	-2.2	-2.1	-1.9	-1.4	-1.4	-1.3	-1.1	-1	-1	-0.7	-0.5
XZ009	申扎县	2019-12-25 16:00:00	0	-1.9	-3	-3.9	-4.4	-4.9	-5.2	-5.4	-5.4	-5.2	-5.2	-5	-4.7	-4	-3.9	-3.5	-3.5	-3	-2.7	-2.4	-2.4	-2.2	-2.2	-2	-1.4	-1.4	-1.4	-1.1	-1	-1	-0.7	-0.5
XZ009	申扎县	2019-12-25 17:00:00	0.1	-1.4	-2.4	-3.2	-3.7	-4.2	-4.7	-5	-5	-4.9	-4.9	-4.8	-4.5	-4	-3.9	-3.5	-3.5	-3	-2.7	-2.4	-2.4	-2.3	-2.2	-2	-1.4	-1.5	-1.4	-1.2	-1	-1	-0.8	-0.5
XZ009	申扎县	2019-12-25 18:00:00	-0.5	-1.5	-2.2	-2.8	-3.2	-3.7	-4.2	-4.5	-4.7	-4.6	-4.6	-4.5	-4.4	-4	-3.8	-3.5	-3.5	-3	-2.8	-2.4	-2.4	-2.3	-2.2	-2	-1.4	-1.5	-1.4	-1.2	-1	-1	-0.8	-0.5
XZ009	申扎县	2019-12-25 19:00:00	-2.4	-2.2	-2.4	-2.8	-3	-3.4	-3.9	-4.2	-4.3	-4.3	-4.3	-4.3	-4.2	-3.9	-3.7	-3.5	-3.4	-3	-2.7	-2.4	-2.4	-2.3	-2.2	-2	-1.4	-1.5	-1.4	-1.2	-1	-1	-0.8	-0.5
XZ009	申扎县	2019-12-25 20:00:00	-4.8	-3.6	-3.2	-3.2	-3.2	-3.4	-3.7	-4	-4.1	-4.1	-4.1	-4.1	-4	-3.7	-3.6	-3.4	-3.4	-3	-2.7	-2.4	-2.4	-2.3	-2.2	-2	-1.4	-1.5	-1.4	-1.2	-1	-1	-0.8	-0.5
XZ009	申扎县	2019-12-25 21:00:00	-6.1	-4.7	-4.1	-3.9	-3.5	-3.5	-3.7	-3.9	-3.9	-3.9	-3.9	-3.9	-3.9	-3.6	-3.5	-3.4	-3.4	-3	-2.7	-2.4	-2.4	-2.3	-2.2	-2	-1.4	-1.5	-1.4	-1.2	-1	-1	-0.8	-0.5
XZ009	申扎县	2019-12-25 22:00:00	-7	-5.5	-4.9	-4.5	-4	-3.8	-3.8	-3.9	-3.9	-3.9	-3.9	-3.8	-3.7	-3.5	-3.5	-3.3	-3.3	-2.9	-2.7	-2.4	-2.4	-2.3	-2.2	-2	-1.5	-1.5	-1.4	-1.2	-1	-1	-0.8	-0.5
XZ009	申扎县	2019-12-25 23:00:00	-8	-6.4	-5.5	-5	-4.5	-4.2	-4	-4	-4	-3.8	-3.8	-3.7	-3.7	-3.4	-3.4	-3.2	-3.2	-2.9	-2.7	-2.4	-2.4	-2.3	-2.2	-2	-1.5	-1.5	-1.4	-1.2	-1	-1	-0.8	-0.5
XZ009	申扎县	2019-12-26 00:00:00	-8.9	-7.1	-6.2	-5.6	-4.9	-4.5	-4.3	-4.2	-4	-3.9	-3.9	-3.7	-3.6	-3.4	-3.3	-3.2	-3.2	-2.8	-2.6	-2.4	-2.4	-2.3	-2.2	-2	-1.5	-1.5	-1.4	-1.2	-1	-1	-0.9	-0.5
XZ009	申扎县	2019-12-26 01:00:00	-9.2	-7.6	-6.7	-6.1	-5.4	-4.9	-4.5	-4.4	-4.2	-3.9	-3.9	-3.8	-3.6	-3.3	-3.2	-3.1	-3.1	-2.8	-2.5	-2.3	-2.3	-2.2	-2.2	-2	-1.5	-1.5	-1.4	-1.2	-1	-1	-0.8	-0.5
XZ009	申扎县	2019-12-26 02:00:00	-9.9	-8.1	-7.2	-6.5	-5.7	-5.2	-4.8	-4.7	-4.4	-4.1	-4.1	-3.9	-3.7	-3.3	-3.2	-3.1	-3.1	-2.7	-2.5	-2.3	-2.3	-2.3	-2.2	-2	-1.5	-1.5	-1.4	-1.2	-1	-1	-0.9	-0.5
XZ009	申扎县	2019-12-26 03:00:00	-10.7	-8.8	-7.7	-7	-6.1	-5.5	-5	-4.9	-4.5	-4.2	-4.2	-4	-3.7	-3.3	-3.2	-3	-3.1	-2.7	-2.5	-2.3	-2.3	-2.2	-2.2	-2	-1.5	-1.5	-1.4	-1.2	-1	-1	-0.9	-0.5
XZ009	申扎县	2019-12-26 04:00:00	-11.4	-9.4	-8.3	-7.5	-6.5	-5.9	-5.4	-5	-4.7	-4.4	-4.4	-4	-3.8	-3.4	-3.3	-3	-3.1	-2.7	-2.5	-2.2	-2.2	-2.2	-2.2	-2	-1.4	-1.5	-1.4	-1.2	-1.1	-1.1	-0.9	-0.5
XZ009	申扎县	2019-12-26 05:00:00	-11.9	-9.9	-8.8	-7.9	-6.9	-6.2	-5.6	-5.4	-4.9	-4.5	-4.5	-4.2	-3.9	-3.4	-3.3	-3.1	-3.1	-2.7	-2.5	-2.2	-2.2	-2.2	-2.2	-2	-1.4	-1.5	-1.4	-1.2	-1	-1	-0.9	-0.6
XZ009	申扎县	2019-12-26 06:00:00	-12.9	-10.6	-9.4	-8.4	-7.4	-6.5	-5.9	-5.5	-5.2	-4.7	-4.7	-4.4	-4	-3.5	-3.4	-3.1	-3.1	-2.7	-2.5	-2.2	-2.2	-2.2	-2.2	-2	-1.4	-1.5	-1.4	-1.2	-1	-1.1	-0.9	-0.5
XZ009	申扎县	2019-12-26 07:00:00	-13.7	-11.3	-10	-8.9	-7.8	-6.9	-6.2	-5.9	-5.4	-4.9	-4.9	-4.5	-4.2	-3.5	-3.4	-3.2	-3.1	-2.7	-2.5	-2.2	-2.2	-2.2	-2.2	-2	-1.4	-1.5	-1.4	-1.2	-1.1	-1.1	-0.9	-0.6
XZ009	申扎县	2019-12-26 08:00:00	-14.1	-11.7	-10.5	-9.4	-8.2	-7.2	-6.5	-6.1	-5.6	-5	-5	-4.7	-4.3	-3.6	-3.5	-3.2	-3.2	-2.8	-2.5	-2.3	-2.2	-2.2	-2.2	-2	-1.4	-1.5	-1.4	-1.2	-1.1	-1.1	-0.9	-0.6
XZ009	申扎县	2019-12-26 09:00:00	-14.4	-12.2	-11	-9.9	-8.6	-7.6	-6.9	-6.4	-5.9	-5.3	-5.3	-4.9	-4.5	-3.7	-3.5	-3.2	-3.2	-2.8	-2.5	-2.3	-2.3	-2.2	-2.2	-2	-1.4	-1.5	-1.5	-1.2	-1.1	-1.1	-0.9	-0.6
XZ009	申扎县	2019-12-26 10:00:00	-14	-12.4	-11.2	-10.2	-8.9	-7.9	-7.2	-6.7	-6.1	-5.5	-5.5	-5	-4.6	-3.8	-3.6	-3.3	-3.2	-2.9	-2.6	-2.3	-2.3	-2.2	-2.2	-2	-1.5	-1.5	-1.4	-1.2	-1.1	-1.1	-0.9	-0.6
XZ009	申扎县	2019-12-26 11:00:00	-11.2	-11.3	-10.9	-10.2	-9	-8.2	-7.4	-6.9	-6.3	-5.7	-5.7	-5.2	-4.8	-4	-3.7	-3.4	-3.3	-2.9	-2.6	-2.4	-2.3	-2.3	-2.2	-2	-1.5	-1.5	-1.4	-1.2	-1.1	-1.1	-0.9	-0.6
XZ009	申扎县	2019-12-26 12:00:00	-7.6	-9.2	-9.5	-9.4	-8.7	-8	-7.5	-7	-6.5	-5.9	-5.9	-5.4	-4.9	-4	-3.8	-3.5	-3.4	-3	-2.7	-2.4	-2.4	-2.3	-2.2	-2	-1.5	-1.5	-1.4	-1.2	-1.1	-1.1	-0.9	-0.6
XZ009	申扎县	2019-12-26 13:00:00	-5.4	-7.2	-7.9	-8.2	-8	-7.6	-7.3	-7	-6.5	-6	-6	-5.5	-5	-4.2	-3.9	-3.6	-3.5	-3	-2.7	-2.4	-2.4	-2.3	-2.2	-2	-1.5	-1.5	-1.5	-1.3	-1.1	-1.1	-0.9	-0.6
XZ009	申扎县	2019-12-26 14:00:00	-2.4	-5.2	-6.4	-6.9	-7	-7	-6.9	-6.8	-6.4	-5.9	-5.9	-5.5	-5.1	-4.2	-4	-3.7	-3.5	-3.1	-2.8	-2.5	-2.4	-2.3	-2.2	-2.1	-1.5	-1.5	-1.5	-1.3	-1.1	-1.1	-0.9	-0.6
XZ009	申扎县	2019-12-26 15:00:00	-0.2	-3.2	-4.7	-5.5	-6	-6.2	-6.4	-6.4	-6.2	-5.8	-5.8	-5.5	-5.1	-4.3	-4	-3.7	-3.6	-3.1	-2.9	-2.5	-2.4	-2.4	-2.3	-2.1	-1.5	-1.5	-1.5	-1.3	-1.1	-1.1	-0.9	-0.7
XZ009	申扎县	2019-12-26 16:00:00	-0.3	-2.3	-3.5	-4.4	-4.9	-5.4	-5.7	-5.9	-5.9	-5.6	-5.6	-5.4	-5	-4.3	-4	-3.7	-3.7	-3.2	-2.9	-2.5	-2.5	-2.4	-2.3	-2.1	-1.5	-1.5	-1.5	-1.3	-1.1	-1.1	-0.9	-0.6
XZ009	申扎县	2019-12-26 17:00:00	-0.9	-2.2	-3	-3.8	-4.3	-4.7	-5.1	-5.4	-5.4	-5.3	-5.3	-5.1	-4.9	-4.3	-4.1	-3.8	-3.7	-3.2	-2.9	-2.5	-2.5	-2.4	-2.4	-2.1	-1.5	-1.6	-1.5	-1.3	-1.1	-1.1	-0.9	-0.7
XZ009	申扎县	2019-12-26 18:00:00	-1.7	-2.4	-2.9	-3.5	-3.9	-4.3	-4.7	-5	-5	-5	-5	-4.9	-4.7	-4.2	-4	-3.7	-3.7	-3.2	-2.9	-2.6	-2.5	-2.4	-2.4	-2.2	-1.5	-1.6	-1.5	-1.3	-1.2	-1.1	-0.9	-0.6
XZ009	申扎县	2019-12-26 19:00:00	-3.5	-3.2	-3.2	-3.5	-3.7	-4	-4.4	-4.7	-4.7	-4.7	-4.7	-4.6	-4.5	-4.1	-4	-3.7	-3.7	-3.2	-2.9	-2.6	-2.5	-2.5	-2.4	-2.2	-1.5	-1.6	-1.5	-1.3	-1.2	-1.2	-0.9	-0.7
XZ009	申扎县	2019-12-26 20:00:00	-5.9	-4.5	-4.1	-4	-3.9	-4	-4.2	-4.5	-4.5	-4.5	-4.5	-4.4	-4.3	-4	-3.9	-3.7	-3.6	-3.2	-2.9	-2.6	-2.5	-2.5	-2.4	-2.2	-1.6	-1.6	-1.5	-1.3	-1.2	-1.2	-0.9	-0.7
XZ009	申扎县	2019-12-26 21:00:00	-7.1	-5.7	-5	-4.7	-4.3	-4.2	-4.2	-4.4	-4.4	-4.4	-4.4	-4.2	-4.2	-3.9	-3.8	-3.5	-3.5	-3.2	-2.9	-2.6	-2.5	-2.5	-2.4	-2.2	-1.6	-1.7	-1.5	-1.4	-1.2	-1.2	-0.9	-0.7
XZ009	申扎县	2019-12-26 22:00:00	-7.9	-6.4	-5.7	-5.3	-4.7	-4.5	-4.4	-4.5	-4.4	-4.2	-4.2	-4.2	-4.1	-3.8	-3.7	-3.5	-3.5	-3.1	-2.9	-2.6	-2.5	-2.5	-2.4	-2.2	-1.6	-1.7	-1.6	-1.4	-1.2	-1.2	-1	-0.7
XZ009	申扎县	2019-12-26 23:00:00	-8.5	-7	-6.3	-5.8	-5.2	-4.8	-4.6	-4.6	-4.5	-4.2	-4.2	-4.2	-4	-3.7	-3.7	-3.5	-3.5	-3.1	-2.9	-2.6	-2.5	-2.5	-2.4	-2.2	-1.6	-1.7	-1.6	-1.4	-1.2	-1.2	-1	-0.7
XZ009	申扎县	2019-12-27 00:00:00	-9.1	-7.5	-6.8	-6.2	-5.5	-5.1	-4.9	-4.7	-4.5	-4.3	-4.3	-4.2	-4	-3.7	-3.6	-3.4	-3.4	-3	-2.8	-2.5	-2.5	-2.5	-2.4	-2.2	-1.6	-1.7	-1.6	-1.4	-1.2	-1.2	-1	-0.7
XZ009	申扎县	2019-12-27 01:00:00	-9.7	-8.1	-7.2	-6.6	-5.9	-5.4	-5	-4.9	-4.7	-4.4	-4.4	-4.2	-4	-3.7	-3.5	-3.4	-3.4	-3	-2.8	-2.5	-2.5	-2.5	-2.4	-2.2	-1.6	-1.7	-1.6	-1.4	-1.2	-1.2	-1	-0.7
XZ009	申扎县	2019-12-27 02:00:00	-10.1	-8.5	-7.7	-7	-6.2	-5.7	-5.3	-5.1	-4.8	-4.5	-4.5	-4.3	-4	-3.7	-3.5	-3.4	-3.4	-3	-2.8	-2.5	-2.5	-2.5	-2.4	-2.2	-1.6	-1.7	-1.6	-1.4	-1.2	-1.2	-1	-0.7
XZ009	申扎县	2019-12-27 03:00:00	-10.4	-8.9	-8	-7.4	-6.5	-5.9	-5.5	-5.3	-5	-4.6	-4.6	-4.4	-4.1	-3.7	-3.5	-3.4	-3.4	-3	-2.7	-2.5	-2.5	-2.4	-2.4	-2.2	-1.6	-1.7	-1.6	-1.4	-1.2	-1.2	-1	-0.7
XZ009	申扎县	2019-12-27 04:00:00	-10.5	-9.1	-8.3	-7.6	-6.8	-6.2	-5.7	-5.5	-5.2	-4.7	-4.7	-4.5	-4.2	-3.7	-3.6	-3.4	-3.4	-3	-2.7	-2.5	-2.5	-2.4	-2.4	-2.2	-1.6	-1.7	-1.6	-1.4	-1.2	-1.2	-1	-0.7
XZ009	申扎县	2019-12-27 05:00:00	-10.7	-9.3	-8.5	-7.9	-7	-6.4	-5.9	-5.7	-5.3	-4.9	-4.9	-4.6	-4.3	-3.7	-3.6	-3.4	-3.4	-3	-2.7	-2.5	-2.5	-2.4	-2.4	-2.2	-1.7	-1.7	-1.6	-1.4	-1.2	-1.2	-1	-0.7
XZ009	申扎县	2019-12-27 06:00:00	-10.9	-9.5	-8.7	-8	-7.2	-6.6	-6.1	-5.8	-5.4	-5	-5	-4.7	-4.4	-3.8	-3.7	-3.4	-3.4	-3	-2.7	-2.5	-2.5	-2.4	-2.4	-2.2	-1.6	-1.7	-1.6	-1.4	-1.2	-1.2	-1	-0.7
XZ009	申扎县	2019-12-27 07:00:00	-11.2	-9.7	-8.9	-8.3	-7.4	-6.7	-6.2	-6	-5.5	-5.1	-5.1	-4.8	-4.5	-3.9	-3.7	-3.4	-3.4	-3	-2.8	-2.5	-2.5	-2.4	-2.4	-2.2	-1.7	-1.7	-1.6	-1.4	-1.2	-1.2	-1	-0.7
XZ009	申扎县	2019-12-27 08:00:00	-11.5	-10	-9.2	-8.5	-7.6	-6.9	-6.4	-6.1	-5.7	-5.2	-5.2	-4.9	-4.5	-3.9	-3.7	-3.5	-3.4	-3	-2.8	-2.5	-2.5	-2.4	-2.4	-2.2	-1.6	-1.7	-1.6	-1.4	-1.2	-1.2	-1	-0.7
XZ009	申扎县	2019-12-27 09:00:00	-11.7	-10.3	-9.4	-8.7	-7.8	-7.1	-6.5	-6.3	-5.9	-5.4	-5.4	-5	-4.6	-4	-3.8	-3.5	-3.5	-3	-2.8	-2.5	-2.5	-2.4	-2.4	-2.2	-1.6	-1.7	-1.6	-1.4	-1.2	-1.3	-1	-0.7
XZ009	申扎县	2019-12-27 10:00:00	-11.9	-10.5	-9.7	-8.9	-8	-7.3	-6.7	-6.4	-6	-5.5	-5.5	-5.1	-4.7	-4	-3.9	-3.5	-3.5	-3.1	-2.9	-2.5	-2.5	-2.4	-2.4	-2.2	-1.7	-1.7	-1.6	-1.4	-1.3	-1.2	-1	-0.7
XZ009	申扎县	2019-12-27 11:00:00	-11	-10.3	-9.7	-9	-8.1	-7.4	-6.9	-6.5	-6.1	-5.6	-5.6	-5.2	-4.9	-4.1	-3.9	-3.6	-3.5	-3.1	-2.9	-2.6	-2.5	-2.5	-2.4	-2.2	-1.7	-1.7	-1.6	-1.4	-1.2	-1.3	-1	-0.8
XZ009	申扎县	2019-12-27 12:00:00	-8.9	-9.2	-9.1	-8.7	-8	-7.5	-7	-6.7	-6.2	-5.7	-5.7	-5.3	-4.9	-4.2	-4	-3.7	-3.6	-3.2	-2.9	-2.6	-2.5	-2.5	-2.4	-2.2	-1.7	-1.7	-1.7	-1.4	-1.2	-1.3	-1	-0.7
XZ009	申扎县	2019-12-27 13:00:00	-6.3	-7.6	-8	-8	-7.6	-7.2	-6.9	-6.7	-6.2	-5.8	-5.8	-5.4	-5	-4.3	-4	-3.7	-3.6	-3.2	-2.9	-2.6	-2.6	-2.5	-2.4	-2.2	-1.7	-1.7	-1.7	-1.4	-1.2	-1.3	-1	-0.7
XZ009	申扎县	2019-12-27 14:00:00	-3.6	-5.7	-6.5	-6.9	-6.9	-6.8	-6.7	-6.5	-6.2	-5.8	-5.8	-5.4	-5	-4.3	-4.1	-3.8	-3.7	-3.2	-3	-2.7	-2.6	-2.5	-2.5	-2.3	-1.7	-1.8	-1.7	-1.4	-1.3	-1.3	-1	-0.7
XZ009	申扎县	2019-12-27 15:00:00	-1.6	-3.9	-5	-5.7	-6	-6.1	-6.2	-6.2	-6	-5.7	-5.7	-5.4	-5	-4.4	-4.1	-3.9	-3.7	-3.3	-3	-2.7	-2.6	-2.5	-2.5	-2.3	-1.7	-1.8	-1.7	-1.4	-1.3	-1.3	-1.1	-0.8
XZ009	申扎县	2019-12-27 16:00:00	-1.5	-2.9	-3.9	-4.6	-5	-5.4	-5.7	-5.9	-5.7	-5.5	-5.5	-5.3	-5	-4.4	-4.2	-3.9	-3.7	-3.3	-3	-2.7	-2.7	-2.5	-2.5	-2.3	-1.7	-1.8	-1.7	-1.5	-1.3	-1.3	-1	-0.8
XZ009	申扎县	2019-12-27 17:00:00	-3	-3.2	-3.5	-4	-4.4	-4.8	-5.1	-5.4	-5.4	-5.2	-5.2	-5.1	-4.9	-4.3	-4.1	-3.9	-3.8	-3.3	-3	-2.7	-2.7	-2.6	-2.5	-2.3	-1.7	-1.8	-1.7	-1.5	-1.3	-1.3	-1.1	-0.8
XZ009	申扎县	2019-12-27 18:00:00	-3.8	-3.7	-3.8	-4	-4.2	-4.4	-4.7	-5	-5	-5	-5	-4.9	-4.7	-4.2	-4.1	-3.9	-3.7	-3.4	-3	-2.7	-2.7	-2.6	-2.5	-2.4	-1.7	-1.8	-1.7	-1.5	-1.3	-1.3	-1.1	-0.8
XZ009	申扎县	2019-12-27 19:00:00	-5.6	-4.6	-4.3	-4.2	-4.2	-4.3	-4.5	-4.8	-4.8	-4.7	-4.7	-4.7	-4.5	-4.1	-4	-3.8	-3.7	-3.3	-3	-2.7	-2.7	-2.7	-2.5	-2.4	-1.7	-1.8	-1.7	-1.5	-1.3	-1.3	-1.1	-0.8
XZ009	申扎县	2019-12-27 20:00:00	-7.4	-5.8	-5.1	-4.8	-4.5	-4.4	-4.5	-4.7	-4.6	-4.5	-4.5	-4.5	-4.4	-4	-3.9	-3.7	-3.7	-3.3	-3	-2.8	-2.7	-2.6	-2.5	-2.4	-1.8	-1.9	-1.7	-1.5	-1.4	-1.3	-1.1	-0.8
XZ009	申扎县	2019-12-27 21:00:00	-8.5	-6.7	-5.9	-5.4	-4.9	-4.7	-4.6	-4.7	-4.5	-4.4	-4.4	-4.4	-4.2	-3.9	-3.9	-3.7	-3.7	-3.3	-3	-2.7	-2.7	-2.6	-2.5	-2.4	-1.8	-1.9	-1.7	-1.5	-1.4	-1.4	-1.1	-0.9
XZ009	申扎县	2019-12-27 22:00:00	-9.5	-7.6	-6.7	-6.1	-5.4	-5	-4.8	-4.8	-4.6	-4.4	-4.4	-4.3	-4.2	-3.9	-3.8	-3.6	-3.6	-3.2	-3	-2.7	-2.7	-2.6	-2.5	-2.4	-1.8	-1.9	-1.7	-1.5	-1.4	-1.4	-1.1	-0.9
XZ009	申扎县	2019-12-27 23:00:00	-10.4	-8.4	-7.4	-6.7	-5.9	-5.4	-5	-5	-4.7	-4.5	-4.5	-4.4	-4.2	-3.8	-3.7	-3.5	-3.5	-3.2	-3	-2.7	-2.7	-2.6	-2.5	-2.4	-1.7	-1.9	-1.7	-1.5	-1.4	-1.4	-1.1	-0.9
XZ009	申扎县	2019-12-28 00:00:00	-11.1	-9.1	-8	-7.3	-6.4	-5.7	-5.4	-5.2	-4.9	-4.6	-4.6	-4.4	-4.2	-3.8	-3.7	-3.5	-3.5	-3.2	-2.9	-2.7	-2.7	-2.6	-2.5	-2.4	-1.8	-1.9	-1.7	-1.5	-1.4	-1.4	-1.2	-0.9
XZ009	申扎县	2019-12-28 01:00:00	-11.4	-9.5	-8.5	-7.7	-6.8	-6.1	-5.7	-5.4	-5	-4.7	-4.7	-4.5	-4.2	-3.8	-3.7	-3.5	-3.5	-3.2	-2.9	-2.7	-2.7	-2.6	-2.5	-2.4	-1.8	-1.9	-1.7	-1.5	-1.4	-1.4	-1.1	-0.9
XZ009	申扎县	2019-12-28 02:00:00	-11.9	-10	-9	-8.2	-7.2	-6.4	-5.9	-5.6	-5.3	-4.9	-4.9	-4.6	-4.3	-3.8	-3.7	-3.5	-3.5	-3.2	-2.9	-2.7	-2.6	-2.6	-2.5	-2.4	-1.8	-1.9	-1.7	-1.5	-1.4	-1.4	-1.2	-0.9
XZ009	申扎县	2019-12-28 03:00:00	-12.1	-10.4	-9.4	-8.5	-7.5	-6.7	-6.2	-5.9	-5.5	-5	-5	-4.7	-4.4	-3.9	-3.8	-3.5	-3.5	-3.1	-2.9	-2.6	-2.6	-2.5	-2.5	-2.4	-1.8	-1.9	-1.7	-1.5	-1.4	-1.4	-1.2	-0.9
XZ009	申扎县	2019-12-28 04:00:00	-12.5	-10.7	-9.7	-8.9	-7.8	-7	-6.5	-6.1	-5.7	-5.2	-5.2	-4.9	-4.5	-3.9	-3.8	-3.5	-3.5	-3.2	-2.9	-2.6	-2.6	-2.5	-2.5	-2.4	-1.8	-1.9	-1.8	-1.5	-1.4	-1.4	-1.2	-0.9
XZ009	申扎县	2019-12-28 05:00:00	-12.7	-11	-10	-9.2	-8.1	-7.3	-6.7	-6.4	-5.9	-5.4	-5.4	-5	-4.7	-4	-3.9	-3.6	-3.5	-3.2	-2.9	-2.6	-2.6	-2.6	-2.5	-2.4	-1.8	-1.9	-1.7	-1.5	-1.4	-1.4	-1.2	-0.9
XZ009	申扎县	2019-12-28 06:00:00	-13	-11.3	-10.4	-9.4	-8.4	-7.5	-6.9	-6.5	-6	-5.5	-5.5	-5.1	-4.8	-4.1	-3.9	-3.6	-3.6	-3.2	-2.9	-2.7	-2.6	-2.6	-2.5	-2.4	-1.8	-1.9	-1.8	-1.5	-1.4	-1.4	-1.2	-0.9
XZ009	申扎县	2019-12-28 07:00:00	-13.4	-11.7	-10.6	-9.7	-8.6	-7.8	-7.2	-6.7	-6.2	-5.7	-5.7	-5.3	-4.9	-4.2	-4	-3.7	-3.6	-3.2	-3	-2.7	-2.7	-2.6	-2.5	-2.4	-1.8	-1.9	-1.8	-1.5	-1.4	-1.4	-1.2	-0.9
XZ009	申扎县	2019-12-28 08:00:00	-13.8	-12	-10.9	-10	-8.9	-8	-7.4	-6.9	-6.4	-5.9	-5.9	-5.4	-5	-4.3	-4	-3.7	-3.7	-3.2	-3	-2.7	-2.7	-2.6	-2.5	-2.4	-1.8	-1.9	-1.8	-1.5	-1.4	-1.4	-1.2	-0.9
XZ009	申扎县	2019-12-28 09:00:00	-14	-12.3	-11.2	-10.3	-9.2	-8.2	-7.6	-7.2	-6.6	-6	-6	-5.6	-5.2	-4.4	-4.2	-3.9	-3.7	-3.3	-3	-2.7	-2.7	-2.6	-2.5	-2.4	-1.8	-1.9	-1.8	-1.5	-1.4	-1.4	-1.2	-0.9
XZ009	申扎县	2019-12-28 10:00:00	-14	-12.6	-11.5	-10.5	-9.4	-8.5	-7.8	-7.4	-6.8	-6.2	-6.2	-5.7	-5.3	-4.4	-4.2	-3.9	-3.8	-3.4	-3	-2.8	-2.7	-2.7	-2.5	-2.4	-1.8	-1.9	-1.8	-1.5	-1.4	-1.4	-1.2	-0.9
XZ009	申扎县	2019-12-28 11:00:00	-11.5	-11.7	-11.2	-10.6	-9.5	-8.7	-8	-7.5	-7	-6.4	-6.4	-5.9	-5.4	-4.5	-4.3	-3.9	-3.9	-3.4	-3.1	-2.8	-2.7	-2.7	-2.6	-2.4	-1.8	-1.9	-1.8	-1.6	-1.4	-1.4	-1.2	-0.9
XZ009	申扎县	2019-12-28 12:00:00	-8.1	-9.7	-10	-9.9	-9.2	-8.6	-8	-7.7	-7.1	-6.5	-6.5	-6	-5.5	-4.6	-4.4	-4	-3.9	-3.4	-3.2	-2.8	-2.8	-2.7	-2.6	-2.4	-1.9	-1.9	-1.8	-1.6	-1.4	-1.4	-1.2	-0.9
XZ009	申扎县	2019-12-28 13:00:00	-4.7	-7.2	-8.2	-8.6	-8.4	-8.2	-7.9	-7.6	-7.1	-6.5	-6.5	-6.1	-5.6	-4.7	-4.5	-4.1	-4	-3.5	-3.2	-2.9	-2.8	-2.7	-2.7	-2.4	-1.9	-1.9	-1.8	-1.6	-1.4	-1.4	-1.2	-0.9
XZ009	申扎县	2019-12-28 14:00:00	-2.4	-5.2	-6.4	-7.2	-7.4	-7.4	-7.4	-7.3	-7	-6.5	-6.5	-6.1	-5.7	-4.8	-4.5	-4.2	-4	-3.5	-3.3	-2.9	-2.9	-2.7	-2.7	-2.4	-1.9	-1.9	-1.8	-1.6	-1.4	-1.5	-1.2	-0.9
XZ009	申扎县	2019-12-28 15:00:00	-0.7	-3.5	-4.8	-5.8	-6.2	-6.6	-6.8	-6.9	-6.7	-6.4	-6.4	-6	-5.6	-4.9	-4.5	-4.2	-4	-3.6	-3.3	-3	-2.9	-2.8	-2.7	-2.5	-1.9	-1.9	-1.9	-1.6	-1.4	-1.4	-1.2	-0.9
XZ009	申扎县	2019-12-28 16:00:00	-0.5	-2.6	-3.8	-4.7	-5.3	-5.8	-6.1	-6.4	-6.3	-6	-6	-5.9	-5.5	-4.9	-4.6	-4.2	-4.1	-3.7	-3.3	-3	-2.9	-2.8	-2.7	-2.5	-1.9	-1.9	-1.9	-1.6	-1.4	-1.4	-1.2	-0.9
XZ009	申扎县	2019-12-28 17:00:00	-0.4	-2.1	-3.2	-4	-4.5	-5.1	-5.5	-5.9	-5.9	-5.7	-5.7	-5.6	-5.4	-4.7	-4.5	-4.2	-4.2	-3.7	-3.4	-3	-2.9	-2.9	-2.7	-2.5	-1.9	-2	-1.9	-1.6	-1.5	-1.5	-1.2	-0.9
XZ009	申扎县	2019-12-28 18:00:00	-1	-2.1	-2.9	-3.5	-4	-4.5	-5	-5.4	-5.5	-5.4	-5.4	-5.4	-5.2	-4.7	-4.5	-4.2	-4.1	-3.7	-3.4	-3	-3	-2.9	-2.8	-2.5	-1.9	-2	-1.9	-1.7	-1.5	-1.5	-1.2	-0.9
XZ009	申扎县	2019-12-28 19:00:00	-2.7	-2.7	-3	-3.4	-3.8	-4.2	-4.6	-5	-5.1	-5.1	-5.1	-5	-4.9	-4.5	-4.4	-4.2	-4.1	-3.7	-3.4	-3	-3	-2.9	-2.8	-2.5	-2	-2	-1.9	-1.7	-1.5	-1.5	-1.2	-1
XZ009	申扎县	2019-12-28 20:00:00	-5.4	-4.2	-3.9	-3.9	-3.9	-4.1	-4.4	-4.7	-4.9	-4.8	-4.8	-4.8	-4.7	-4.4	-4.4	-4.1	-4	-3.7	-3.4	-3	-3	-2.9	-2.8	-2.6	-2	-2	-1.9	-1.7	-1.5	-1.5	-1.2	-1
XZ009	申扎县	2019-12-28 21:00:00	-7.3	-5.6	-4.9	-4.6	-4.3	-4.3	-4.4	-4.7	-4.7	-4.6	-4.6	-4.6	-4.5	-4.3	-4.2	-4	-4	-3.6	-3.4	-3	-3	-2.9	-2.8	-2.6	-2	-2	-1.9	-1.7	-1.5	-1.5	-1.2	-1
XZ009	申扎县	2019-12-28 22:00:00	-8.7	-6.8	-5.9	-5.4	-4.9	-4.6	-4.5	-4.7	-4.6	-4.5	-4.5	-4.5	-4.4	-4.2	-4.2	-3.9	-3.9	-3.5	-3.3	-3	-3	-2.9	-2.8	-2.6	-2	-2	-1.9	-1.7	-1.5	-1.5	-1.3	-1
XZ009	申扎县	2019-12-28 23:00:00	-9.9	-7.8	-6.8	-6.1	-5.4	-5	-4.9	-4.9	-4.7	-4.5	-4.5	-4.5	-4.4	-4.1	-4	-3.9	-3.9	-3.5	-3.3	-3	-3	-2.9	-2.8	-2.6	-2	-2	-1.9	-1.7	-1.5	-1.5	-1.3	-1
XZ009	申扎县	2019-12-29 00:00:00	-10.7	-8.6	-7.5	-6.8	-6	-5.4	-5.2	-5	-4.9	-4.6	-4.6	-4.5	-4.4	-4	-4	-3.8	-3.8	-3.4	-3.2	-3	-2.9	-2.9	-2.8	-2.6	-2	-2	-2	-1.7	-1.5	-1.5	-1.3	-1
XZ009	申扎县	2019-12-29 01:00:00	-11.4	-9.3	-8.2	-7.4	-6.5	-5.9	-5.5	-5.3	-5	-4.7	-4.7	-4.5	-4.4	-4	-3.9	-3.8	-3.8	-3.4	-3.2	-2.9	-2.9	-2.9	-2.8	-2.6	-2	-2.1	-2	-1.7	-1.5	-1.5	-1.3	-1
XZ009	申扎县	2019-12-29 02:00:00	-12	-9.9	-8.8	-7.9	-7	-6.3	-5.8	-5.5	-5.2	-4.9	-4.9	-4.7	-4.4	-4	-3.9	-3.7	-3.7	-3.4	-3.2	-2.9	-2.9	-2.9	-2.7	-2.6	-2	-2	-2	-1.7	-1.5	-1.5	-1.3	-1
XZ009	申扎县	2019-12-29 03:00:00	-12.6	-10.5	-9.3	-8.4	-7.4	-6.7	-6.1	-5.9	-5.5	-5.1	-5.1	-4.8	-4.5	-4	-3.9	-3.7	-3.7	-3.4	-3.2	-2.9	-2.9	-2.9	-2.8	-2.6	-2	-2	-2	-1.8	-1.5	-1.5	-1.3	-1
XZ009	申扎县	2019-12-29 04:00:00	-13	-10.9	-9.8	-8.9	-7.8	-7	-6.4	-6.1	-5.7	-5.2	-5.2	-4.9	-4.6	-4.1	-3.9	-3.7	-3.7	-3.4	-3.1	-2.9	-2.9	-2.8	-2.7	-2.5	-2	-2	-2	-1.7	-1.5	-1.5	-1.4	-1
XZ009	申扎县	2019-12-29 05:00:00	-13.5	-11.4	-10.2	-9.3	-8.2	-7.4	-6.7	-6.4	-5.9	-5.4	-5.4	-5.1	-4.7	-4.2	-4	-3.7	-3.7	-3.4	-3.1	-2.9	-2.9	-2.8	-2.7	-2.6	-2	-2	-2	-1.7	-1.6	-1.6	-1.4	-1
XZ009	申扎县	2019-12-29 06:00:00	-13.9	-11.9	-10.7	-9.7	-8.6	-7.7	-7	-6.6	-6.2	-5.6	-5.6	-5.3	-4.9	-4.2	-4	-3.8	-3.8	-3.4	-3.2	-2.9	-2.9	-2.8	-2.7	-2.5	-2	-2	-2	-1.7	-1.6	-1.6	-1.4	-1
XZ009	申扎县	2019-12-29 07:00:00	-14.5	-12.4	-11.1	-10.1	-8.9	-8	-7.3	-6.9	-6.4	-5.9	-5.9	-5.4	-5	-4.4	-4.2	-3.9	-3.8	-3.4	-3.2	-2.9	-2.9	-2.8	-2.7	-2.5	-2	-2	-2	-1.7	-1.6	-1.5	-1.4	-1
XZ009	申扎县	2019-12-29 08:00:00	-15.1	-12.9	-11.5	-10.5	-9.3	-8.3	-7.6	-7.2	-6.6	-6	-6	-5.6	-5.2	-4.4	-4.2	-3.9	-3.9	-3.4	-3.2	-2.9	-2.9	-2.8	-2.7	-2.5	-2	-2	-2	-1.8	-1.5	-1.6	-1.4	-1
XZ009	申扎县	2019-12-29 09:00:00	-15.5	-13.3	-12	-10.9	-9.6	-8.6	-7.9	-7.4	-6.8	-6.2	-6.2	-5.8	-5.4	-4.5	-4.3	-4	-3.9	-3.5	-3.2	-2.9	-2.9	-2.9	-2.8	-2.5	-2	-2	-2	-1.7	-1.6	-1.6	-1.4	-1
XZ009	申扎县	2019-12-29 10:00:00	-15.2	-13.5	-12.3	-11.2	-9.9	-8.9	-8.2	-7.6	-7	-6.4	-6.4	-6	-5.5	-4.7	-4.4	-4.1	-4	-3.5	-3.3	-3	-2.9	-2.9	-2.8	-2.6	-2	-2.1	-2	-1.7	-1.6	-1.6	-1.4	-1.1
XZ009	申扎县	2019-12-29 11:00:00	-12	-12.3	-11.9	-11.2	-10.1	-9.1	-8.4	-7.9	-7.3	-6.6	-6.6	-6.2	-5.6	-4.8	-4.5	-4.2	-4	-3.6	-3.4	-3	-3	-2.9	-2.8	-2.6	-2	-2.1	-2	-1.8	-1.6	-1.6	-1.4	-1.1
XZ009	申扎县	2019-12-29 12:00:00	-7.9	-10	-10.4	-10.4	-9.7	-9	-8.5	-8	-7.4	-6.8	-6.8	-6.3	-5.8	-4.9	-4.6	-4.2	-4.2	-3.7	-3.4	-3	-3	-2.9	-2.8	-2.6	-2	-2.1	-2	-1.8	-1.6	-1.6	-1.4	-1.1
XZ009	申扎县	2019-12-29 13:00:00	-4.2	-7.3	-8.4	-8.9	-8.8	-8.5	-8.2	-7.9	-7.4	-6.9	-6.9	-6.4	-5.9	-5	-4.7	-4.4	-4.2	-3.7	-3.4	-3.1	-3	-2.9	-2.9	-2.7	-2	-2.1	-2	-1.8	-1.6	-1.6	-1.4	-1.1
XZ009	申扎县	2019-12-29 14:00:00	-0.9	-4.7	-6.3	-7.2	-7.5	-7.7	-7.7	-7.6	-7.3	-6.8	-6.8	-6.4	-5.9	-5	-4.7	-4.4	-4.3	-3.8	-3.5	-3.1	-3	-3	-2.9	-2.7	-2	-2.1	-2	-1.8	-1.6	-1.6	-1.4	-1.1
XZ009	申扎县	2019-12-29 15:00:00	0.2	-2.8	-4.5	-5.6	-6.2	-6.7	-7	-7.1	-7	-6.6	-6.6	-6.3	-5.9	-5.1	-4.9	-4.5	-4.3	-3.9	-3.5	-3.2	-3.1	-3	-2.9	-2.7	-2.1	-2.2	-2	-1.8	-1.6	-1.6	-1.4	-1.1
XZ009	申扎县	2019-12-29 16:00:00	0.5	-1.9	-3.4	-4.5	-5.2	-5.8	-6.2	-6.5	-6.5	-6.3	-6.3	-6.1	-5.8	-5	-4.9	-4.5	-4.4	-3.9	-3.6	-3.2	-3.2	-3	-2.9	-2.7	-2.1	-2.2	-2	-1.8	-1.7	-1.6	-1.4	-1.1
XZ009	申扎县	2019-12-29 17:00:00	0.5	-1.4	-2.7	-3.7	-4.4	-5	-5.5	-5.9	-6	-5.9	-5.9	-5.8	-5.6	-5	-4.8	-4.5	-4.4	-3.9	-3.6	-3.2	-3.2	-3	-3	-2.7	-2.1	-2.2	-2.1	-1.9	-1.7	-1.6	-1.4	-1.1
XZ009	申扎县	2019-12-29 18:00:00	-0.1	-1.4	-2.4	-3.2	-3.9	-4.5	-5	-5.4	-5.5	-5.5	-5.5	-5.5	-5.4	-4.9	-4.7	-4.4	-4.4	-3.9	-3.6	-3.3	-3.2	-3.1	-3	-2.8	-2.2	-2.2	-2.1	-1.9	-1.7	-1.7	-1.4	-1.1
XZ009	申扎县	2019-12-29 19:00:00	-1.7	-2.1	-2.5	-3.1	-3.5	-4.1	-4.6	-5	-5.2	-5.2	-5.2	-5.2	-5.1	-4.7	-4.7	-4.4	-4.4	-3.9	-3.6	-3.3	-3.2	-3.1	-3	-2.8	-2.2	-2.2	-2.1	-1.9	-1.7	-1.7	-1.4	-1.1
XZ009	申扎县	2019-12-29 20:00:00	-4.5	-3.5	-3.3	-3.4	-3.6	-3.9	-4.3	-4.7	-4.9	-4.9	-4.9	-4.9	-4.9	-4.6	-4.5	-4.3	-4.3	-3.9	-3.6	-3.3	-3.2	-3.1	-3	-2.8	-2.2	-2.2	-2.1	-1.9	-1.7	-1.7	-1.4	-1.2
XZ009	申扎县	2019-12-29 21:00:00	-6.2	-4.9	-4.4	-4.1	-3.9	-4	-4.3	-4.6	-4.7	-4.7	-4.7	-4.7	-4.7	-4.5	-4.4	-4.2	-4.2	-3.8	-3.5	-3.2	-3.2	-3.1	-3	-2.8	-2.2	-2.2	-2.1	-1.9	-1.7	-1.7	-1.5	-1.2
XZ009	申扎县	2019-12-29 22:00:00	-7.1	-5.8	-5.2	-4.9	-4.4	-4.4	-4.4	-4.6	-4.6	-4.5	-4.5	-4.6	-4.5	-4.4	-4.3	-4.1	-4.2	-3.7	-3.5	-3.2	-3.2	-3.1	-3	-2.9	-2.2	-2.2	-2.2	-1.9	-1.7	-1.7	-1.5	-1.2
XZ009	申扎县	2019-12-29 23:00:00	-8.2	-6.6	-5.9	-5.4	-4.9	-4.7	-4.6	-4.7	-4.7	-4.5	-4.5	-4.5	-4.4	-4.2	-4.2	-4	-4.1	-3.7	-3.5	-3.2	-3.2	-3.1	-3	-2.8	-2.2	-2.2	-2.1	-1.9	-1.7	-1.7	-1.5	-1.2
XZ009	申扎县	2019-12-30 00:00:00	-9.4	-7.5	-6.7	-6	-5.4	-5	-4.9	-4.9	-4.7	-4.5	-4.5	-4.5	-4.4	-4.2	-4.1	-4	-4	-3.7	-3.4	-3.2	-3.2	-3.1	-3	-2.8	-2.2	-2.3	-2.2	-1.9	-1.7	-1.7	-1.5	-1.2
XZ009	申扎县	2019-12-30 01:00:00	-10.4	-8.4	-7.4	-6.7	-5.9	-5.4	-5.2	-5	-4.9	-4.7	-4.7	-4.5	-4.4	-4.1	-4	-3.9	-3.9	-3.6	-3.4	-3.1	-3.1	-3	-3	-2.8	-2.2	-2.2	-2.2	-1.9	-1.7	-1.7	-1.5	-1.2
XZ009	申扎县	2019-12-30 02:00:00	-11	-9	-8	-7.2	-6.4	-5.9	-5.5	-5.3	-5	-4.8	-4.8	-4.6	-4.4	-4.1	-4	-3.9	-3.9	-3.5	-3.4	-3.1	-3.1	-3	-3	-2.8	-2.2	-2.2	-2.2	-1.9	-1.7	-1.7	-1.5	-1.2
XZ009	申扎县	2019-12-30 03:00:00	-11.9	-9.7	-8.6	-7.8	-6.9	-6.2	-5.8	-5.6	-5.3	-4.9	-4.9	-4.7	-4.5	-4.1	-4	-3.9	-3.9	-3.5	-3.3	-3	-3	-3	-2.9	-2.8	-2.2	-2.3	-2.2	-1.9	-1.7	-1.7	-1.5	-1.2
XZ009	申扎县	2019-12-30 04:00:00	-12.4	-10.3	-9.2	-8.3	-7.3	-6.6	-6.1	-5.9	-5.5	-5.1	-5.1	-4.8	-4.6	-4.1	-4	-3.9	-3.9	-3.5	-3.3	-3	-3	-3	-2.9	-2.8	-2.2	-2.2	-2.2	-1.9	-1.7	-1.7	-1.5	-1.2
XZ009	申扎县	2019-12-30 05:00:00	-13.4	-11	-9.7	-8.8	-7.7	-7	-6.4	-6.1	-5.7	-5.3	-5.3	-5	-4.7	-4.2	-4	-3.9	-3.9	-3.5	-3.3	-3	-3	-3	-2.9	-2.7	-2.2	-2.2	-2.2	-1.9	-1.7	-1.7	-1.5	-1.2
XZ009	申扎县	2019-12-30 06:00:00	-13.7	-11.4	-10.2	-9.3	-8.2	-7.4	-6.7	-6.4	-5.9	-5.5	-5.5	-5.1	-4.8	-4.2	-4.1	-3.9	-3.9	-3.5	-3.3	-3	-3	-3	-2.9	-2.7	-2.2	-2.2	-2.2	-1.9	-1.7	-1.7	-1.5	-1.2
XZ009	申扎县	2019-12-30 07:00:00	-14.4	-12	-10.7	-9.7	-8.6	-7.7	-7	-6.7	-6.2	-5.7	-5.7	-5.3	-4.9	-4.3	-4.2	-3.9	-3.9	-3.5	-3.3	-3	-3	-2.9	-2.9	-2.7	-2.2	-2.2	-2.2	-1.9	-1.7	-1.7	-1.5	-1.2
XZ009	申扎县	2019-12-30 08:00:00	-15.1	-12.6	-11.2	-10.2	-9	-8	-7.4	-6.9	-6.4	-5.9	-5.9	-5.5	-5.1	-4.4	-4.2	-4	-3.9	-3.5	-3.3	-3	-3	-2.9	-2.9	-2.7	-2.2	-2.2	-2.1	-1.9	-1.7	-1.7	-1.5	-1.2
XZ009	申扎县	2019-12-30 09:00:00	-15.7	-13.2	-11.8	-10.7	-9.4	-8.4	-7.7	-7.2	-6.7	-6.1	-6.1	-5.7	-5.2	-4.5	-4.3	-4	-4	-3.5	-3.3	-3	-3	-3	-2.9	-2.7	-2.2	-2.2	-2.2	-1.9	-1.7	-1.8	-1.5	-1.2
XZ009	申扎县	2019-12-30 10:00:00	-15.2	-13.4	-12.2	-11.1	-9.8	-8.7	-8	-7.5	-6.9	-6.3	-6.3	-5.9	-5.4	-4.6	-4.4	-4.1	-4	-3.6	-3.4	-3	-3	-3	-2.9	-2.7	-2.2	-2.2	-2.2	-1.9	-1.7	-1.7	-1.5	-1.2
XZ009	申扎县	2019-12-30 11:00:00	-12	-12.2	-11.8	-11	-10	-9	-8.2	-7.8	-7.2	-6.5	-6.5	-6	-5.6	-4.7	-4.5	-4.2	-4.1	-3.7	-3.4	-3.1	-3	-3	-2.9	-2.7	-2.2	-2.2	-2.1	-1.9	-1.7	-1.7	-1.5	-1.2
XZ009	申扎县	2019-12-30 12:00:00	-8.3	-10.1	-10.5	-10.3	-9.6	-8.9	-8.4	-7.9	-7.4	-6.7	-6.7	-6.2	-5.7	-4.9	-4.6	-4.3	-4.2	-3.7	-3.5	-3.1	-3.1	-3	-3	-2.7	-2.2	-2.2	-2.2	-1.9	-1.7	-1.7	-1.5	-1.2
XZ009	申扎县	2019-12-30 13:00:00	-4.4	-7.4	-8.4	-8.9	-8.7	-8.5	-8.1	-7.9	-7.4	-6.8	-6.8	-6.4	-5.9	-5	-4.7	-4.4	-4.2	-3.8	-3.5	-3.2	-3.2	-3	-3	-2.8	-2.2	-2.2	-2.2	-1.9	-1.8	-1.8	-1.5	-1.2
XZ009	申扎县	2019-12-30 14:00:00	-1.5	-5.1	-6.5	-7.4	-7.6	-7.7	-7.7	-7.5	-7.2	-6.8	-6.8	-6.4	-5.9	-5	-4.8	-4.5	-4.3	-3.9	-3.5	-3.2	-3.2	-3.1	-3	-2.8	-2.2	-2.3	-2.2	-2	-1.8	-1.8	-1.5	-1.2
XZ009	申扎县	2019-12-30 15:00:00	-0.1	-3.2	-4.7	-5.8	-6.4	-6.7	-7	-7.1	-6.9	-6.6	-6.6	-6.3	-5.9	-5.1	-4.9	-4.5	-4.4	-3.9	-3.6	-3.3	-3.2	-3.1	-3	-2.9	-2.2	-2.3	-2.2	-2	-1.8	-1.8	-1.5	-1.3
XZ009	申扎县	2019-12-30 16:00:00	0.5	-2.1	-3.6	-4.7	-5.4	-5.9	-6.3	-6.5	-6.5	-6.3	-6.3	-6.1	-5.8	-5.1	-4.9	-4.5	-4.4	-4	-3.7	-3.4	-3.2	-3.2	-3	-2.9	-2.2	-2.3	-2.2	-2	-1.8	-1.8	-1.5	-1.3
XZ009	申扎县	2019-12-30 17:00:00	-0.4	-2	-3	-3.9	-4.5	-5.1	-5.7	-6	-6	-6	-6	-5.9	-5.6	-5	-4.9	-4.5	-4.5	-4	-3.7	-3.4	-3.3	-3.2	-3.1	-2.9	-2.3	-2.3	-2.2	-2	-1.8	-1.8	-1.5	-1.3
XZ009	申扎县	2019-12-30 18:00:00	-0.3	-1.9	-2.8	-3.5	-4.1	-4.7	-5.1	-5.5	-5.7	-5.6	-5.6	-5.5	-5.4	-5	-4.8	-4.5	-4.5	-4	-3.7	-3.4	-3.3	-3.2	-3.1	-2.9	-2.3	-2.4	-2.2	-2	-1.8	-1.8	-1.6	-1.3
XZ009	申扎县	2019-12-30 19:00:00	-2.3	-2.5	-2.9	-3.4	-3.8	-4.3	-4.7	-5.2	-5.3	-5.3	-5.3	-5.3	-5.2	-4.9	-4.7	-4.5	-4.4	-4	-3.7	-3.4	-3.3	-3.2	-3.1	-2.9	-2.3	-2.4	-2.2	-2	-1.8	-1.8	-1.5	-1.3
XZ009	申扎县	2019-12-30 20:00:00	-4.4	-3.7	-3.6	-3.7	-3.8	-4.2	-4.5	-4.9	-5	-5	-5	-5	-5	-4.7	-4.6	-4.4	-4.4	-4	-3.7	-3.4	-3.4	-3.2	-3.2	-2.9	-2.3	-2.4	-2.2	-2	-1.9	-1.9	-1.6	-1.3
XZ009	申扎县	2019-12-30 21:00:00	-5.8	-4.8	-4.4	-4.3	-4.1	-4.2	-4.4	-4.7	-4.8	-4.8	-4.8	-4.8	-4.8	-4.5	-4.5	-4.3	-4.3	-3.9	-3.7	-3.4	-3.3	-3.2	-3.2	-2.9	-2.4	-2.4	-2.3	-2	-1.9	-1.9	-1.6	-1.3
XZ009	申扎县	2019-12-30 22:00:00	-7.2	-5.9	-5.2	-4.9	-4.5	-4.5	-4.5	-4.7	-4.7	-4.7	-4.7	-4.7	-4.6	-4.4	-4.4	-4.2	-4.2	-3.9	-3.6	-3.4	-3.3	-3.2	-3.2	-2.9	-2.4	-2.4	-2.3	-2	-1.9	-1.9	-1.6	-1.3
XZ009	申扎县	2019-12-30 23:00:00	-8.4	-6.8	-6	-5.5	-5	-4.8	-4.7	-4.8	-4.7	-4.7	-4.7	-4.6	-4.5	-4.3	-4.3	-4.1	-4.2	-3.8	-3.6	-3.3	-3.3	-3.2	-3.1	-2.9	-2.4	-2.4	-2.3	-2	-1.9	-1.9	-1.6	-1.3
XZ009	申扎县	2019-12-31 00:00:00	-9.2	-7.5	-6.7	-6.2	-5.5	-5.2	-5	-5	-4.9	-4.7	-4.7	-4.6	-4.5	-4.2	-4.2	-4	-4.1	-3.7	-3.5	-3.3	-3.2	-3.2	-3.1	-2.9	-2.4	-2.4	-2.3	-2	-1.9	-1.9	-1.6	-1.4
XZ009	申扎县	2019-12-31 01:00:00	-10.2	-8.3	-7.4	-6.7	-6	-5.5	-5.2	-5.2	-5	-4.7	-4.7	-4.6	-4.5	-4.2	-4.2	-4	-4	-3.7	-3.5	-3.2	-3.2	-3.2	-3.1	-2.9	-2.4	-2.4	-2.3	-2	-1.9	-1.9	-1.6	-1.4
XZ009	申扎县	2019-12-31 02:00:00	-10.9	-8.9	-8	-7.3	-6.4	-5.9	-5.5	-5.4	-5.2	-4.9	-4.9	-4.7	-4.5	-4.2	-4.2	-4	-4	-3.7	-3.4	-3.2	-3.2	-3.2	-3.1	-2.9	-2.4	-2.4	-2.3	-2	-1.9	-1.9	-1.7	-1.4
XZ009	申扎县	2019-12-31 03:00:00	-11.6	-9.5	-8.5	-7.7	-6.9	-6.2	-5.9	-5.7	-5.4	-5	-5	-4.8	-4.5	-4.2	-4.1	-3.9	-4	-3.6	-3.4	-3.1	-3.2	-3.1	-3	-2.9	-2.3	-2.4	-2.3	-2	-1.9	-1.9	-1.7	-1.4
XZ009	申扎县	2019-12-31 04:00:00	-12.2	-10.2	-9.1	-8.2	-7.3	-6.6	-6.2	-5.9	-5.5	-5.2	-5.2	-4.9	-4.7	-4.2	-4.2	-3.9	-4	-3.6	-3.4	-3.2	-3.1	-3.1	-3	-2.9	-2.3	-2.4	-2.3	-2	-1.9	-1.9	-1.7	-1.4
XZ009	申扎县	2019-12-31 05:00:00	-12.5	-10.5	-9.5	-8.7	-7.7	-7	-6.5	-6.2	-5.7	-5.4	-5.4	-5	-4.7	-4.3	-4.2	-4	-4	-3.6	-3.4	-3.1	-3.1	-3.1	-3	-2.9	-2.3	-2.4	-2.3	-2	-1.9	-1.9	-1.7	-1.4
XZ009	申扎县	2019-12-31 06:00:00	-12.5	-10.7	-9.8	-9	-8	-7.3	-6.7	-6.4	-6	-5.5	-5.5	-5.2	-4.9	-4.4	-4.2	-4	-4	-3.6	-3.4	-3.1	-3.1	-3.1	-3	-2.9	-2.3	-2.4	-2.3	-2	-1.9	-1.9	-1.7	-1.4
XZ009	申扎县	2019-12-31 07:00:00	-12.3	-10.9	-10	-9.2	-8.3	-7.5	-7	-6.6	-6.2	-5.7	-5.7	-5.4	-5	-4.4	-4.2	-4	-4	-3.6	-3.4	-3.1	-3.1	-3.1	-3	-2.9	-2.3	-2.4	-2.2	-2	-1.9	-1.9	-1.7	-1.4
XZ009	申扎县	2019-12-31 08:00:00	-11.7	-10.7	-10	-9.4	-8.4	-7.7	-7.2	-6.8	-6.4	-5.9	-5.9	-5.5	-5.2	-4.5	-4.3	-4	-4	-3.7	-3.4	-3.1	-3.1	-3.1	-3	-2.9	-2.3	-2.4	-2.3	-2	-1.9	-1.9	-1.7	-1.4
XZ009	申扎县	2019-12-31 09:00:00	-11.5	-10.5	-10	-9.4	-8.5	-7.9	-7.3	-7	-6.5	-6	-6	-5.7	-5.3	-4.6	-4.4	-4.1	-4	-3.7	-3.4	-3.2	-3.1	-3.1	-3	-2.9	-2.3	-2.4	-2.3	-2	-1.9	-1.9	-1.7	-1.4
XZ009	申扎县	2019-12-31 10:00:00	-11.5	-10.6	-10	-9.4	-8.5	-7.9	-7.4	-7	-6.7	-6.2	-6.2	-5.8	-5.4	-4.7	-4.5	-4.2	-4.2	-3.7	-3.5	-3.2	-3.1	-3	-3	-2.9	-2.3	-2.4	-2.3	-2	-1.9	-1.9	-1.7	-1.4
XZ009	申扎县	2019-12-31 11:00:00	-9.9	-10	-9.7	-9.4	-8.6	-8	-7.5	-7.2	-6.7	-6.2	-6.2	-5.9	-5.4	-4.7	-4.5	-4.2	-4.2	-3.7	-3.5	-3.2	-3.2	-3.1	-3	-2.9	-2.3	-2.4	-2.3	-2	-1.9	-1.9	-1.7	-1.4
XZ009	申扎县	2019-12-31 12:00:00	-6.4	-8.3	-8.7	-8.7	-8.3	-7.9	-7.5	-7.2	-6.9	-6.3	-6.3	-6	-5.5	-4.8	-4.6	-4.3	-4.2	-3.8	-3.5	-3.2	-3.2	-3.1	-3	-2.9	-2.3	-2.4	-2.3	-2	-1.9	-1.9	-1.7	-1.4
XZ009	申扎县	2019-12-31 13:00:00	-3.5	-6	-7	-7.5	-7.5	-7.4	-7.2	-7.1	-6.8	-6.4	-6.4	-6	-5.6	-4.9	-4.7	-4.4	-4.3	-3.9	-3.5	-3.3	-3.2	-3.1	-3	-2.9	-2.3	-2.4	-2.3	-2	-1.9	-1.9	-1.7	-1.4
XZ009	申扎县	2019-12-31 14:00:00	-1.7	-4.3	-5.5	-6.2	-6.5	-6.7	-6.8	-6.9	-6.6	-6.3	-6.3	-6	-5.7	-4.9	-4.7	-4.4	-4.4	-3.9	-3.6	-3.3	-3.2	-3.2	-3.1	-2.9	-2.3	-2.4	-2.3	-2.1	-1.9	-1.9	-1.7	-1.4
XZ009	申扎县	2019-12-31 15:00:00	-0.7	-3.2	-4.4	-5.2	-5.6	-6	-6.2	-6.4	-6.4	-6.1	-6.1	-5.9	-5.6	-4.9	-4.7	-4.4	-4.4	-3.9	-3.7	-3.3	-3.3	-3.2	-3.1	-2.9	-2.3	-2.4	-2.3	-2.1	-1.9	-1.9	-1.7	-1.4
XZ009	申扎县	2019-12-31 16:00:00	-0.1	-2.4	-3.5	-4.4	-4.9	-5.3	-5.7	-6	-6	-5.9	-5.9	-5.7	-5.5	-4.9	-4.7	-4.5	-4.4	-4	-3.7	-3.4	-3.3	-3.2	-3.2	-3	-2.4	-2.4	-2.3	-2.1	-1.9	-1.9	-1.7	-1.4
XZ009	申扎县	2019-12-31 17:00:00	-0.2	-1.9	-2.9	-3.7	-4.2	-4.7	-5.2	-5.5	-5.6	-5.5	-5.5	-5.4	-5.3	-4.9	-4.7	-4.4	-4.4	-3.9	-3.7	-3.4	-3.3	-3.2	-3.2	-3	-2.4	-2.4	-2.4	-2.1	-1.9	-1.9	-1.7	-1.4
XZ009	申扎县	2019-12-31 18:00:00	-1.5	-2.2	-2.7	-3.4	-3.8	-4.3	-4.7	-5.1	-5.2	-5.2	-5.2	-5.2	-5.1	-4.7	-4.6	-4.4	-4.4	-4	-3.7	-3.4	-3.4	-3.3	-3.2	-3	-2.4	-2.4	-2.4	-2.1	-1.9	-1.9	-1.7	-1.4
XZ009	申扎县	2019-12-31 19:00:00	-3	-2.9	-3.1	-3.4	-3.6	-4	-4.4	-4.8	-4.9	-4.9	-4.9	-4.9	-4.9	-4.6	-4.5	-4.4	-4.3	-3.9	-3.7	-3.4	-3.4	-3.3	-3.2	-3	-2.4	-2.4	-2.4	-2.1	-1.9	-1.9	-1.7	-1.4
XZ009	申扎县	2019-12-31 20:00:00	-4.2	-3.7	-3.6	-3.7	-3.7	-4	-4.3	-4.6	-4.7	-4.7	-4.7	-4.7	-4.7	-4.5	-4.4	-4.3	-4.2	-3.9	-3.7	-3.4	-3.3	-3.3	-3.2	-3	-2.4	-2.4	-2.4	-2.1	-2	-1.9	-1.7	-1.4
XZ009	申扎县	2019-12-31 21:00:00	-5.1	-4.4	-4.2	-4.1	-4	-4	-4.2	-4.5	-4.5	-4.5	-4.5	-4.5	-4.5	-4.4	-4.4	-4.2	-4.2	-3.9	-3.6	-3.4	-3.3	-3.2	-3.2	-3	-2.4	-2.5	-2.4	-2.2	-2	-1.9	-1.7	-1.4
XZ009	申扎县	2019-12-31 22:00:00	-5.6	-5	-4.7	-4.5	-4.2	-4.2	-4.3	-4.5	-4.5	-4.4	-4.4	-4.5	-4.4	-4.2	-4.2	-4.1	-4.1	-3.8	-3.5	-3.3	-3.3	-3.2	-3.2	-3	-2.4	-2.5	-2.4	-2.2	-2	-2	-1.7	-1.4
XZ009	申扎县	2019-12-31 23:00:00	-6.6	-5.6	-5.1	-4.9	-4.5	-4.4	-4.4	-4.5	-4.5	-4.4	-4.4	-4.4	-4.4	-4.2	-4.2	-4	-4	-3.7	-3.5	-3.2	-3.2	-3.2	-3.2	-3	-2.4	-2.5	-2.4	-2.2	-2	-2	-1.7	-1.5
XZ009	申扎县	2020-01-01 00:00:00	-7	-6	-5.6	-5.2	-4.8	-4.6	-4.5	-4.6	-4.5	-4.4	-4.4	-4.4	-4.3	-4	-4.1	-3.9	-4	-3.7	-3.5	-3.2	-3.2	-3.2	-3.2	-3	-2.4	-2.5	-2.4	-2.2	-2	-2	-1.7	-1.4
XZ009	申扎县	2020-01-01 01:00:00	-7.7	-6.6	-6	-5.6	-5.1	-4.9	-4.7	-4.7	-4.6	-4.4	-4.4	-4.4	-4.2	-4	-4	-3.9	-3.9	-3.6	-3.4	-3.2	-3.2	-3.2	-3.1	-3	-2.4	-2.5	-2.4	-2.2	-2	-2	-1.7	-1.4
XZ009	申扎县	2020-01-01 02:00:00	-8.2	-7	-6.4	-6	-5.4	-5	-4.9	-4.9	-4.7	-4.5	-4.5	-4.4	-4.2	-4	-4	-3.9	-3.9	-3.5	-3.4	-3.2	-3.2	-3.1	-3.1	-3	-2.4	-2.4	-2.4	-2.2	-2	-2	-1.7	-1.4
XZ009	申扎县	2020-01-01 03:00:00	-9	-7.5	-6.9	-6.4	-5.7	-5.3	-5.1	-5	-4.8	-4.5	-4.5	-4.4	-4.3	-4	-4	-3.8	-3.9	-3.5	-3.4	-3.1	-3.1	-3.1	-3	-2.9	-2.4	-2.4	-2.4	-2.2	-2	-2	-1.7	-1.5
XZ009	申扎县	2020-01-01 04:00:00	-10	-8.3	-7.4	-6.8	-6.1	-5.6	-5.3	-5.2	-4.9	-4.7	-4.7	-4.5	-4.3	-4	-3.9	-3.8	-3.9	-3.5	-3.4	-3.1	-3.1	-3.1	-3	-2.9	-2.3	-2.4	-2.4	-2.2	-2	-2	-1.7	-1.4
XZ009	申扎县	2020-01-01 05:00:00	-10.5	-8.9	-8	-7.3	-6.5	-5.9	-5.5	-5.4	-5.1	-4.8	-4.8	-4.5	-4.4	-4	-4	-3.8	-3.8	-3.5	-3.3	-3	-3.1	-3	-3	-2.9	-2.3	-2.4	-2.4	-2.2	-2	-2	-1.7	-1.5
XZ009	申扎县	2020-01-01 06:00:00	-10.4	-9	-8.3	-7.7	-6.9	-6.2	-5.8	-5.6	-5.3	-4.9	-4.9	-4.7	-4.5	-4	-4	-3.8	-3.9	-3.5	-3.3	-3	-3	-3	-3	-2.9	-2.3	-2.4	-2.3	-2.1	-2	-2	-1.7	-1.5
XZ009	申扎县	2020-01-01 07:00:00	-10.6	-9.3	-8.5	-7.9	-7.1	-6.5	-6	-5.8	-5.5	-5.1	-5.1	-4.8	-4.5	-4.1	-4	-3.8	-3.8	-3.5	-3.3	-3	-3	-3	-3	-2.9	-2.3	-2.4	-2.3	-2.1	-2	-2	-1.7	-1.5
XZ009	申扎县	2020-01-01 08:00:00	-10.8	-9.5	-8.7	-8.1	-7.3	-6.7	-6.2	-6	-5.6	-5.2	-5.2	-4.9	-4.7	-4.1	-4	-3.8	-3.9	-3.5	-3.3	-3	-3	-3	-3	-2.9	-2.3	-2.4	-2.3	-2.1	-1.9	-1.9	-1.7	-1.4
XZ009	申扎县	2020-01-01 09:00:00	-11.2	-9.7	-9	-8.4	-7.5	-6.9	-6.4	-6.2	-5.8	-5.4	-5.4	-5	-4.7	-4.2	-4.1	-3.9	-3.9	-3.5	-3.3	-3	-3	-3	-3	-2.9	-2.3	-2.4	-2.3	-2.1	-1.9	-2	-1.7	-1.5
XZ009	申扎县	2020-01-01 10:00:00	-10.9	-9.9	-9.2	-8.5	-7.7	-7	-6.6	-6.3	-5.9	-5.5	-5.5	-5.2	-4.9	-4.3	-4.2	-3.9	-3.9	-3.5	-3.3	-3	-3	-3	-3	-2.8	-2.2	-2.4	-2.3	-2.1	-1.9	-1.9	-1.7	-1.5
XZ009	申扎县	2020-01-01 11:00:00	-9.2	-9.2	-9	-8.5	-7.8	-7.2	-6.7	-6.5	-6	-5.6	-5.6	-5.3	-4.9	-4.3	-4.2	-3.9	-3.9	-3.5	-3.3	-3	-3	-3	-3	-2.8	-2.3	-2.4	-2.3	-2.1	-1.9	-2	-1.7	-1.5
XZ009	申扎县	2020-01-01 12:00:00	-7.2	-8	-8.2	-8.1	-7.6	-7.2	-6.8	-6.5	-6.2	-5.7	-5.7	-5.4	-5	-4.4	-4.2	-4	-4	-3.6	-3.4	-3.1	-3	-3	-3	-2.9	-2.3	-2.4	-2.3	-2.1	-1.9	-2	-1.7	-1.5
XZ009	申扎县	2020-01-01 13:00:00	-4.4	-6.4	-7	-7.3	-7.1	-6.9	-6.7	-6.5	-6.2	-5.8	-5.8	-5.5	-5.1	-4.5	-4.4	-4	-4	-3.6	-3.4	-3.1	-3.1	-3	-3	-2.9	-2.2	-2.4	-2.3	-2.1	-1.9	-1.9	-1.7	-1.5
XZ009	申扎县	2020-01-01 14:00:00	-2.7	-4.8	-5.7	-6.2	-6.3	-6.4	-6.4	-6.4	-6.1	-5.7	-5.7	-5.5	-5.2	-4.5	-4.4	-4.1	-4	-3.7	-3.4	-3.1	-3.1	-3	-3	-2.9	-2.3	-2.4	-2.3	-2.1	-1.9	-2	-1.7	-1.5
XZ009	申扎县	2020-01-01 15:00:00	-2.5	-4	-4.8	-5.4	-5.5	-5.8	-5.9	-6	-5.9	-5.6	-5.6	-5.4	-5.2	-4.5	-4.4	-4.1	-4.1	-3.7	-3.4	-3.2	-3.1	-3.1	-3	-2.9	-2.3	-2.4	-2.3	-2.1	-1.9	-1.9	-1.7	-1.5
XZ009	申扎县	2020-01-01 16:00:00	-2.4	-3.6	-4.3	-4.8	-5	-5.3	-5.5	-5.7	-5.7	-5.5	-5.5	-5.3	-5	-4.5	-4.4	-4.2	-4.1	-3.7	-3.5	-3.2	-3.2	-3.1	-3	-2.9	-2.3	-2.4	-2.3	-2.1	-2	-2	-1.7	-1.4
XZ009	申扎县	2020-01-01 17:00:00	-2.9	-3.6	-4	-4.4	-4.6	-4.9	-5.2	-5.4	-5.4	-5.2	-5.2	-5.2	-5	-4.5	-4.4	-4.2	-4.1	-3.7	-3.5	-3.2	-3.2	-3.1	-3	-2.9	-2.3	-2.4	-2.3	-2.1	-1.9	-1.9	-1.7	-1.5
XZ009	申扎县	2020-01-01 18:00:00	-3.7	-3.9	-4.1	-4.4	-4.4	-4.6	-4.9	-5.1	-5.1	-5	-5	-5	-4.8	-4.5	-4.4	-4.1	-4.1	-3.7	-3.5	-3.2	-3.2	-3.2	-3.1	-2.9	-2.3	-2.4	-2.3	-2.1	-1.9	-2	-1.7	-1.5
XZ009	申扎县	2020-01-01 19:00:00	-4.4	-4.3	-4.3	-4.4	-4.4	-4.5	-4.7	-4.9	-4.9	-4.9	-4.9	-4.8	-4.7	-4.4	-4.3	-4.1	-4.1	-3.7	-3.5	-3.2	-3.2	-3.1	-3.1	-2.9	-2.4	-2.4	-2.4	-2.1	-1.9	-2	-1.7	-1.5
XZ009	申扎县	2020-01-01 20:00:00	-5.3	-4.8	-4.7	-4.6	-4.5	-4.5	-4.6	-4.8	-4.8	-4.7	-4.7	-4.7	-4.6	-4.3	-4.2	-4	-4	-3.7	-3.5	-3.2	-3.2	-3.1	-3.1	-2.9	-2.4	-2.4	-2.4	-2.1	-2	-2	-1.7	-1.5
XZ009	申扎县	2020-01-01 21:00:00	-6.2	-5.4	-5.1	-4.9	-4.7	-4.6	-4.6	-4.8	-4.7	-4.7	-4.7	-4.5	-4.5	-4.2	-4.2	-4	-4	-3.7	-3.4	-3.2	-3.2	-3.1	-3.1	-2.9	-2.4	-2.4	-2.4	-2.2	-2	-2	-1.8	-1.5
XZ009	申扎县	2020-01-01 22:00:00	-6.9	-6	-5.5	-5.3	-4.9	-4.7	-4.7	-4.8	-4.7	-4.5	-4.5	-4.5	-4.4	-4.2	-4.1	-4	-4	-3.6	-3.4	-3.2	-3.2	-3.1	-3.1	-2.9	-2.4	-2.4	-2.4	-2.1	-2	-2	-1.7	-1.5
XZ009	申扎县	2020-01-01 23:00:00	-7.4	-6.4	-5.9	-5.6	-5.2	-4.9	-4.8	-4.9	-4.7	-4.5	-4.5	-4.5	-4.4	-4.1	-4	-3.9	-3.9	-3.6	-3.4	-3.2	-3.2	-3.1	-3	-2.9	-2.3	-2.4	-2.4	-2.2	-2	-2	-1.8	-1.5
XZ009	申扎县	2020-01-02 00:00:00	-7.9	-6.9	-6.3	-5.9	-5.4	-5.1	-4.9	-5	-4.8	-4.6	-4.6	-4.5	-4.3	-4	-4	-3.9	-3.9	-3.5	-3.4	-3.1	-3.1	-3.1	-3	-2.9	-2.4	-2.4	-2.4	-2.2	-2	-2	-1.7	-1.5
XZ009	申扎县	2020-01-02 01:00:00	-8.5	-7.4	-6.7	-6.2	-5.7	-5.3	-5.1	-5.1	-4.9	-4.7	-4.7	-4.5	-4.4	-4	-4	-3.9	-3.9	-3.5	-3.4	-3.1	-3.1	-3.1	-3	-2.9	-2.4	-2.4	-2.4	-2.1	-2	-2	-1.7	-1.5
XZ009	申扎县	2020-01-02 02:00:00	-9.2	-7.8	-7.1	-6.6	-5.9	-5.5	-5.3	-5.2	-5	-4.7	-4.7	-4.5	-4.4	-4	-4	-3.8	-3.9	-3.5	-3.3	-3.1	-3.1	-3	-3	-2.9	-2.4	-2.4	-2.4	-2.2	-2	-2	-1.7	-1.5
XZ009	申扎县	2020-01-02 03:00:00	-9.8	-8.3	-7.5	-7	-6.3	-5.8	-5.5	-5.4	-5.1	-4.8	-4.8	-4.6	-4.4	-4	-4	-3.8	-3.9	-3.5	-3.3	-3	-3	-3	-3	-2.9	-2.3	-2.4	-2.3	-2.2	-2	-2	-1.8	-1.5
XZ009	申扎县	2020-01-02 04:00:00	-9.8	-8.6	-7.9	-7.3	-6.5	-6	-5.7	-5.5	-5.2	-4.9	-4.9	-4.7	-4.5	-4	-4	-3.8	-3.9	-3.5	-3.3	-3	-3	-3	-3	-2.9	-2.3	-2.4	-2.4	-2.2	-2	-2	-1.8	-1.5
XZ009	申扎县	2020-01-02 05:00:00	-9.9	-8.7	-8.1	-7.5	-6.8	-6.2	-5.9	-5.7	-5.4	-5	-5	-4.8	-4.5	-4.1	-4	-3.8	-3.8	-3.5	-3.3	-3	-3	-3	-3	-2.9	-2.3	-2.4	-2.4	-2.1	-2	-2	-1.8	-1.5
XZ009	申扎县	2020-01-02 06:00:00	-10.3	-9	-8.3	-7.7	-7	-6.4	-6	-5.9	-5.5	-5.1	-5.1	-4.9	-4.6	-4.1	-4	-3.9	-3.9	-3.5	-3.3	-3	-3	-3	-3	-2.9	-2.3	-2.4	-2.3	-2.1	-2	-2	-1.8	-1.5
XZ009	申扎县	2020-01-02 07:00:00	-10.9	-9.4	-8.6	-8	-7.2	-6.6	-6.2	-6	-5.7	-5.2	-5.2	-5	-4.7	-4.2	-4	-3.9	-3.9	-3.5	-3.3	-3	-3	-3	-3	-2.9	-2.2	-2.4	-2.3	-2.1	-2	-2	-1.8	-1.5
XZ009	申扎县	2020-01-02 08:00:00	-11.4	-9.9	-9	-8.3	-7.5	-6.9	-6.4	-6.2	-5.7	-5.4	-5.4	-5.1	-4.8	-4.2	-4.1	-3.9	-3.9	-3.5	-3.3	-3	-3	-3	-3	-2.9	-2.3	-2.4	-2.3	-2.1	-2	-2	-1.8	-1.5
XZ009	申扎县	2020-01-02 09:00:00	-12.5	-10.5	-9.5	-8.7	-7.7	-7	-6.6	-6.3	-5.9	-5.5	-5.5	-5.2	-4.9	-4.3	-4.2	-3.9	-3.9	-3.5	-3.3	-3	-3	-3	-3	-2.9	-2.2	-2.4	-2.3	-2.1	-2	-2	-1.8	-1.5
XZ009	申扎县	2020-01-02 10:00:00	-12.6	-11	-10	-9.1	-8.1	-7.4	-6.8	-6.5	-6	-5.6	-5.6	-5.3	-4.9	-4.4	-4.2	-4	-3.9	-3.5	-3.4	-3	-3	-3	-3	-2.9	-2.3	-2.4	-2.3	-2.1	-2	-2	-1.7	-1.5
XZ009	申扎县	2020-01-02 11:00:00	-10	-10.2	-9.8	-9.2	-8.3	-7.6	-7	-6.7	-6.2	-5.8	-5.8	-5.4	-5	-4.4	-4.3	-4	-4	-3.6	-3.4	-3	-3	-3	-3	-2.9	-2.3	-2.4	-2.3	-2.1	-2	-2	-1.8	-1.5
XZ009	申扎县	2020-01-02 12:00:00	-7.2	-8.5	-8.7	-8.7	-8.1	-7.6	-7.1	-6.9	-6.4	-5.9	-5.9	-5.5	-5.2	-4.5	-4.4	-4	-4	-3.7	-3.4	-3.1	-3.1	-3	-3	-2.9	-2.3	-2.4	-2.3	-2.1	-2	-2	-1.8	-1.5
XZ009	申扎县	2020-01-02 13:00:00	-5	-6.8	-7.4	-7.7	-7.5	-7.2	-7	-6.9	-6.5	-6	-6	-5.7	-5.3	-4.6	-4.4	-4.1	-4.1	-3.7	-3.4	-3.1	-3.1	-3.1	-3	-2.9	-2.3	-2.4	-2.3	-2.1	-2	-2	-1.7	-1.5
XZ009	申扎县	2020-01-02 14:00:00	-3.3	-5.2	-6.1	-6.7	-6.7	-6.7	-6.7	-6.6	-6.4	-6	-6	-5.7	-5.4	-4.7	-4.5	-4.2	-4.1	-3.7	-3.5	-3.2	-3.2	-3.1	-3	-2.9	-2.4	-2.4	-2.3	-2.1	-2	-2	-1.8	-1.5
XZ009	申扎县	2020-01-02 15:00:00	-3.8	-4.8	-5.4	-5.8	-6	-6.2	-6.2	-6.4	-6.2	-5.9	-5.9	-5.6	-5.3	-4.7	-4.5	-4.2	-4.2	-3.7	-3.5	-3.2	-3.2	-3.1	-3	-2.9	-2.3	-2.4	-2.4	-2.2	-2	-2	-1.8	-1.5
XZ009	申扎县	2020-01-02 16:00:00	-4.3	-4.9	-5.2	-5.5	-5.5	-5.7	-5.9	-6	-5.9	-5.7	-5.7	-5.5	-5.2	-4.7	-4.5	-4.3	-4.2	-3.8	-3.5	-3.2	-3.2	-3.2	-3.1	-2.9	-2.4	-2.4	-2.4	-2.1	-2	-2	-1.8	-1.5
XZ009	申扎县	2020-01-02 17:00:00	-5	-5	-5.2	-5.4	-5.4	-5.5	-5.6	-5.8	-5.7	-5.5	-5.5	-5.4	-5.2	-4.7	-4.5	-4.3	-4.2	-3.8	-3.5	-3.3	-3.2	-3.2	-3.1	-2.9	-2.4	-2.4	-2.4	-2.2	-2	-2	-1.8	-1.5
XZ009	申扎县	2020-01-02 18:00:00	-5.5	-5.4	-5.4	-5.4	-5.3	-5.4	-5.4	-5.6	-5.5	-5.4	-5.4	-5.2	-5	-4.6	-4.5	-4.3	-4.2	-3.9	-3.5	-3.3	-3.2	-3.2	-3.1	-2.9	-2.4	-2.4	-2.4	-2.2	-2	-2	-1.8	-1.5
XZ009	申扎县	2020-01-02 19:00:00	-6	-5.7	-5.5	-5.5	-5.3	-5.3	-5.4	-5.5	-5.4	-5.2	-5.2	-5.1	-5	-4.5	-4.4	-4.2	-4.2	-3.8	-3.6	-3.3	-3.3	-3.2	-3.2	-3	-2.4	-2.5	-2.4	-2.2	-2	-2	-1.8	-1.5
XZ009	申扎县	2020-01-02 20:00:00	-6.9	-6.2	-5.9	-5.7	-5.4	-5.3	-5.3	-5.4	-5.3	-5.2	-5.2	-5	-4.9	-4.5	-4.4	-4.2	-4.2	-3.8	-3.6	-3.3	-3.3	-3.2	-3.2	-3	-2.4	-2.5	-2.4	-2.2	-2	-2	-1.8	-1.5
XZ009	申扎县	2020-01-02 21:00:00	-7.8	-6.8	-6.4	-6	-5.6	-5.4	-5.4	-5.4	-5.2	-5.1	-5.1	-5	-4.8	-4.5	-4.4	-4.2	-4.2	-3.8	-3.5	-3.3	-3.3	-3.2	-3.2	-3	-2.4	-2.5	-2.4	-2.2	-2	-2	-1.8	-1.5
XZ009	申扎县	2020-01-02 22:00:00	-8.5	-7.4	-6.7	-6.4	-5.9	-5.6	-5.4	-5.4	-5.3	-5	-5	-4.9	-4.8	-4.4	-4.4	-4.1	-4.2	-3.8	-3.5	-3.3	-3.3	-3.2	-3.2	-3	-2.4	-2.5	-2.4	-2.2	-2	-2	-1.8	-1.5
XZ009	申扎县	2020-01-02 23:00:00	-9.4	-8	-7.2	-6.7	-6.1	-5.7	-5.5	-5.5	-5.4	-5.1	-5.1	-4.9	-4.7	-4.4	-4.3	-4.1	-4.1	-3.7	-3.5	-3.3	-3.2	-3.2	-3.2	-3	-2.4	-2.5	-2.4	-2.2	-2	-2	-1.9	-1.5
XZ009	申扎县	2020-01-03 00:00:00	-10.3	-8.6	-7.8	-7.2	-6.4	-6	-5.7	-5.7	-5.4	-5.1	-5.1	-4.9	-4.7	-4.4	-4.3	-4	-4.1	-3.7	-3.5	-3.2	-3.2	-3.2	-3.2	-3	-2.4	-2.5	-2.4	-2.2	-2	-2	-1.8	-1.5
XZ009	申扎县	2020-01-03 01:00:00	-10.9	-9.2	-8.4	-7.7	-6.9	-6.3	-5.9	-5.8	-5.5	-5.2	-5.2	-5	-4.8	-4.4	-4.3	-4	-4.1	-3.7	-3.5	-3.2	-3.2	-3.2	-3.2	-3	-2.4	-2.5	-2.4	-2.2	-2	-2	-1.9	-1.5
XZ009	申扎县	2020-01-03 02:00:00	-10.6	-9.4	-8.6	-8	-7.2	-6.5	-6.2	-6	-5.7	-5.3	-5.3	-5	-4.9	-4.4	-4.3	-4	-4	-3.7	-3.5	-3.2	-3.2	-3.2	-3.2	-3	-2.4	-2.5	-2.4	-2.2	-2	-2	-1.9	-1.5
XZ009	申扎县	2020-01-03 03:00:00	-10.4	-9.4	-8.7	-8.2	-7.4	-6.7	-6.4	-6.2	-5.8	-5.5	-5.5	-5.2	-4.9	-4.4	-4.3	-4.1	-4.1	-3.7	-3.5	-3.2	-3.2	-3.2	-3.2	-3	-2.4	-2.5	-2.4	-2.2	-2	-2	-1.9	-1.5
XZ009	申扎县	2020-01-03 04:00:00	-11.4	-9.8	-9	-8.4	-7.5	-6.9	-6.5	-6.3	-5.9	-5.5	-5.5	-5.3	-5	-4.4	-4.4	-4.1	-4.1	-3.7	-3.5	-3.2	-3.2	-3.2	-3.2	-3	-2.4	-2.5	-2.4	-2.2	-2	-2	-1.9	-1.6
XZ009	申扎县	2020-01-03 05:00:00	-12.2	-10.4	-9.4	-8.7	-7.8	-7.2	-6.7	-6.4	-6	-5.7	-5.7	-5.4	-5	-4.5	-4.4	-4.1	-4.1	-3.7	-3.5	-3.2	-3.2	-3.2	-3.2	-3	-2.4	-2.5	-2.4	-2.2	-2	-2	-1.9	-1.5
XZ009	申扎县	2020-01-03 06:00:00	-12.7	-10.9	-9.9	-9	-8.1	-7.4	-6.9	-6.6	-6.2	-5.8	-5.8	-5.5	-5.2	-4.5	-4.4	-4.2	-4.1	-3.7	-3.5	-3.2	-3.2	-3.2	-3.2	-3	-2.4	-2.5	-2.4	-2.2	-2	-2.1	-1.9	-1.6
XZ009	申扎县	2020-01-03 07:00:00	-13.2	-11.3	-10.3	-9.4	-8.4	-7.7	-7.1	-6.8	-6.4	-5.9	-5.9	-5.6	-5.2	-4.6	-4.5	-4.2	-4.2	-3.8	-3.5	-3.3	-3.2	-3.2	-3.2	-3	-2.4	-2.5	-2.4	-2.2	-2	-2.1	-1.9	-1.5
XZ009	申扎县	2020-01-03 08:00:00	-13.5	-11.7	-10.7	-9.8	-8.7	-7.9	-7.4	-7	-6.5	-6	-6	-5.7	-5.4	-4.7	-4.5	-4.2	-4.2	-3.8	-3.5	-3.3	-3.2	-3.2	-3.2	-3	-2.4	-2.5	-2.4	-2.2	-2	-2.1	-1.9	-1.6
XZ009	申扎县	2020-01-03 09:00:00	-13.7	-11.9	-10.9	-10	-9	-8.2	-7.5	-7.2	-6.7	-6.2	-6.2	-5.9	-5.5	-4.8	-4.5	-4.3	-4.2	-3.9	-3.6	-3.3	-3.3	-3.2	-3.2	-3	-2.4	-2.5	-2.4	-2.2	-2	-2	-1.9	-1.5
XZ009	申扎县	2020-01-03 10:00:00	-13.5	-12.1	-11.2	-10.3	-9.2	-8.4	-7.8	-7.4	-6.9	-6.4	-6.4	-6	-5.6	-4.9	-4.7	-4.4	-4.3	-3.9	-3.6	-3.4	-3.3	-3.2	-3.2	-3	-2.5	-2.5	-2.4	-2.2	-2	-2.1	-1.9	-1.6
XZ009	申扎县	2020-01-03 11:00:00	-11.7	-11.5	-11	-10.3	-9.4	-8.5	-8	-7.6	-7.1	-6.5	-6.5	-6.1	-5.7	-4.9	-4.7	-4.4	-4.4	-3.9	-3.7	-3.4	-3.3	-3.3	-3.2	-3	-2.4	-2.5	-2.5	-2.2	-2.1	-2.1	-1.9	-1.5
XZ009	申扎县	2020-01-03 12:00:00	-8.1	-9.7	-9.9	-9.8	-9.2	-8.5	-8	-7.7	-7.2	-6.7	-6.7	-6.3	-5.8	-5	-4.8	-4.5	-4.4	-4	-3.7	-3.4	-3.4	-3.3	-3.2	-3	-2.5	-2.5	-2.5	-2.2	-2.1	-2.1	-1.9	-1.5
XZ009	申扎县	2020-01-03 13:00:00	-5	-7.4	-8.3	-8.7	-8.4	-8.2	-7.9	-7.7	-7.2	-6.7	-6.7	-6.4	-5.9	-5.1	-4.9	-4.5	-4.5	-4	-3.7	-3.4	-3.4	-3.3	-3.2	-3	-2.5	-2.5	-2.5	-2.3	-2.1	-2.1	-1.9	-1.6
XZ009	申扎县	2020-01-03 14:00:00	-2.1	-5.1	-6.5	-7.2	-7.5	-7.5	-7.5	-7.4	-7.1	-6.7	-6.7	-6.4	-6	-5.2	-5	-4.7	-4.5	-4.1	-3.8	-3.5	-3.4	-3.4	-3.3	-3.1	-2.5	-2.5	-2.5	-2.3	-2.1	-2.1	-1.9	-1.6
XZ009	申扎县	2020-01-03 15:00:00	-1.4	-3.7	-5	-5.9	-6.4	-6.7	-6.9	-7	-6.9	-6.5	-6.5	-6.3	-5.9	-5.2	-5	-4.7	-4.5	-4.1	-3.9	-3.5	-3.5	-3.4	-3.3	-3.1	-2.5	-2.6	-2.5	-2.3	-2.1	-2.1	-1.9	-1.6
XZ009	申扎县	2020-01-03 16:00:00	-2.2	-3.6	-4.4	-5.2	-5.5	-6	-6.3	-6.5	-6.5	-6.3	-6.3	-6.1	-5.9	-5.2	-5	-4.7	-4.6	-4.2	-3.9	-3.5	-3.5	-3.4	-3.3	-3.1	-2.5	-2.6	-2.5	-2.3	-2.1	-2.1	-1.9	-1.6
XZ009	申扎县	2020-01-03 17:00:00	-2.4	-3.5	-4.2	-4.8	-5.1	-5.5	-5.9	-6.2	-6.2	-6	-6	-5.9	-5.7	-5.2	-5	-4.7	-4.6	-4.2	-3.9	-3.6	-3.5	-3.5	-3.4	-3.1	-2.5	-2.6	-2.5	-2.3	-2.1	-2.1	-1.9	-1.6
XZ009	申扎县	2020-01-03 18:00:00	-3.4	-3.9	-4.2	-4.6	-4.8	-5.2	-5.5	-5.8	-5.9	-5.7	-5.7	-5.7	-5.5	-5	-4.9	-4.7	-4.6	-4.2	-3.9	-3.6	-3.5	-3.5	-3.4	-3.2	-2.6	-2.6	-2.5	-2.3	-2.1	-2.2	-1.9	-1.7
XZ009	申扎县	2020-01-03 19:00:00	-4.4	-4.4	-4.5	-4.7	-4.7	-5	-5.2	-5.5	-5.5	-5.5	-5.5	-5.5	-5.4	-5	-4.9	-4.7	-4.6	-4.2	-3.9	-3.6	-3.5	-3.5	-3.4	-3.2	-2.6	-2.7	-2.5	-2.3	-2.2	-2.2	-1.9	-1.7
XZ009	申扎县	2020-01-03 20:00:00	-5.9	-5.2	-4.9	-4.9	-4.8	-4.9	-5.1	-5.4	-5.4	-5.3	-5.3	-5.3	-5.2	-4.9	-4.8	-4.5	-4.5	-4.2	-3.9	-3.6	-3.5	-3.5	-3.4	-3.2	-2.6	-2.7	-2.5	-2.4	-2.2	-2.2	-1.9	-1.7
XZ009	申扎县	2020-01-03 21:00:00	-7.2	-6.1	-5.6	-5.4	-5.1	-5	-5.1	-5.3	-5.3	-5.2	-5.2	-5.2	-5	-4.7	-4.7	-4.5	-4.5	-4.1	-3.9	-3.5	-3.5	-3.5	-3.4	-3.2	-2.6	-2.7	-2.5	-2.4	-2.2	-2.2	-1.9	-1.7
XZ009	申扎县	2020-01-03 22:00:00	-8.2	-6.9	-6.3	-5.9	-5.5	-5.2	-5.2	-5.3	-5.2	-5.1	-5.1	-5	-5	-4.7	-4.6	-4.4	-4.4	-4	-3.9	-3.5	-3.5	-3.5	-3.4	-3.2	-2.6	-2.7	-2.6	-2.4	-2.2	-2.2	-1.9	-1.7
XZ009	申扎县	2020-01-03 23:00:00	-8.5	-7.4	-6.8	-6.4	-5.9	-5.5	-5.4	-5.4	-5.3	-5.1	-5.1	-5	-4.9	-4.6	-4.5	-4.4	-4.4	-4	-3.8	-3.5	-3.5	-3.5	-3.4	-3.2	-2.7	-2.7	-2.6	-2.4	-2.2	-2.2	-2	-1.7
XZ009	申扎县	2020-01-04 00:00:00	-9.2	-7.9	-7.2	-6.7	-6.1	-5.8	-5.6	-5.5	-5.4	-5.2	-5.2	-5	-4.9	-4.5	-4.5	-4.3	-4.4	-4	-3.8	-3.5	-3.5	-3.5	-3.4	-3.2	-2.6	-2.7	-2.6	-2.4	-2.2	-2.2	-1.9	-1.7
XZ009	申扎县	2020-01-04 01:00:00	-9.4	-8.2	-7.6	-7.1	-6.4	-6	-5.8	-5.7	-5.5	-5.2	-5.2	-5.1	-4.9	-4.5	-4.5	-4.3	-4.3	-4	-3.7	-3.5	-3.5	-3.4	-3.4	-3.2	-2.6	-2.7	-2.6	-2.4	-2.2	-2.2	-2	-1.7
XZ009	申扎县	2020-01-04 02:00:00	-9.1	-8.3	-7.8	-7.4	-6.7	-6.2	-5.9	-5.8	-5.6	-5.3	-5.3	-5.1	-4.9	-4.5	-4.4	-4.2	-4.3	-3.9	-3.7	-3.5	-3.5	-3.4	-3.4	-3.2	-2.6	-2.7	-2.6	-2.4	-2.2	-2.2	-2	-1.7
XZ009	申扎县	2020-01-04 03:00:00	-9	-8.4	-7.9	-7.4	-6.9	-6.4	-6.1	-6	-5.7	-5.4	-5.4	-5.2	-4.9	-4.5	-4.5	-4.2	-4.2	-3.9	-3.7	-3.5	-3.5	-3.4	-3.4	-3.2	-2.6	-2.7	-2.6	-2.4	-2.2	-2.2	-2	-1.7
XZ009	申扎县	2020-01-04 04:00:00	-9.3	-8.4	-8	-7.5	-6.9	-6.5	-6.2	-6.1	-5.8	-5.5	-5.5	-5.2	-5	-4.5	-4.5	-4.2	-4.3	-3.9	-3.7	-3.4	-3.4	-3.4	-3.4	-3.2	-2.6	-2.7	-2.6	-2.4	-2.2	-2.2	-2	-1.7
XZ009	申扎县	2020-01-04 05:00:00	-9.4	-8.6	-8.1	-7.7	-7	-6.6	-6.3	-6.2	-5.9	-5.5	-5.5	-5.4	-5	-4.6	-4.5	-4.2	-4.3	-3.9	-3.7	-3.4	-3.4	-3.4	-3.4	-3.2	-2.6	-2.7	-2.6	-2.4	-2.2	-2.2	-2	-1.7
XZ009	申扎县	2020-01-04 06:00:00	-9.6	-8.7	-8.2	-7.8	-7.2	-6.7	-6.4	-6.3	-5.9	-5.6	-5.6	-5.4	-5.1	-4.6	-4.5	-4.2	-4.3	-3.9	-3.7	-3.4	-3.4	-3.4	-3.4	-3.2	-2.6	-2.7	-2.6	-2.4	-2.2	-2.2	-2	-1.7
XZ009	申扎县	2020-01-04 07:00:00	-10.5	-9.2	-8.5	-8	-7.3	-6.8	-6.5	-6.4	-6	-5.7	-5.7	-5.4	-5.2	-4.7	-4.5	-4.3	-4.3	-3.9	-3.7	-3.4	-3.4	-3.4	-3.4	-3.2	-2.6	-2.7	-2.6	-2.4	-2.2	-2.2	-2	-1.7
XZ009	申扎县	2020-01-04 08:00:00	-11.3	-9.8	-8.9	-8.3	-7.5	-7	-6.6	-6.5	-6.1	-5.7	-5.7	-5.5	-5.2	-4.7	-4.5	-4.3	-4.3	-3.9	-3.7	-3.4	-3.4	-3.4	-3.4	-3.2	-2.6	-2.7	-2.6	-2.4	-2.2	-2.2	-2	-1.7
XZ009	申扎县	2020-01-04 09:00:00	-11.8	-10.2	-9.4	-8.7	-7.9	-7.2	-6.8	-6.6	-6.2	-5.9	-5.9	-5.5	-5.3	-4.7	-4.5	-4.4	-4.3	-3.9	-3.7	-3.5	-3.4	-3.4	-3.4	-3.2	-2.6	-2.7	-2.6	-2.4	-2.2	-2.2	-2	-1.7
XZ009	申扎县	2020-01-04 10:00:00	-11.5	-10.5	-9.7	-9	-8.1	-7.5	-7	-6.7	-6.4	-5.9	-5.9	-5.7	-5.3	-4.7	-4.6	-4.4	-4.4	-4	-3.7	-3.4	-3.4	-3.4	-3.4	-3.2	-2.6	-2.7	-2.6	-2.4	-2.2	-2.2	-2	-1.7
XZ009	申扎县	2020-01-04 11:00:00	-9.4	-9.7	-9.5	-9	-8.2	-7.7	-7.2	-6.9	-6.5	-6	-6	-5.7	-5.4	-4.8	-4.7	-4.4	-4.4	-4	-3.7	-3.5	-3.5	-3.4	-3.4	-3.2	-2.5	-2.7	-2.6	-2.4	-2.2	-2.2	-2	-1.7
XZ009	申扎县	2020-01-04 12:00:00	-7	-8.2	-8.5	-8.5	-8	-7.6	-7.2	-7	-6.6	-6.2	-6.2	-5.9	-5.5	-4.9	-4.7	-4.4	-4.4	-4	-3.7	-3.4	-3.5	-3.4	-3.4	-3.2	-2.6	-2.7	-2.6	-2.4	-2.2	-2.2	-2	-1.7
XZ009	申扎县	2020-01-04 13:00:00	-5	-6.5	-7.2	-7.5	-7.5	-7.2	-7	-6.9	-6.6	-6.2	-6.2	-5.9	-5.6	-4.9	-4.7	-4.5	-4.4	-4	-3.8	-3.5	-3.5	-3.4	-3.4	-3.2	-2.6	-2.7	-2.6	-2.4	-2.2	-2.2	-2	-1.7
XZ009	申扎县	2020-01-04 14:00:00	-5	-6	-6.4	-6.7	-6.7	-6.7	-6.7	-6.7	-6.5	-6.2	-6.2	-5.9	-5.6	-5	-4.8	-4.5	-4.5	-4	-3.8	-3.5	-3.5	-3.4	-3.4	-3.2	-2.6	-2.7	-2.6	-2.4	-2.2	-2.2	-2	-1.7
XZ009	申扎县	2020-01-04 15:00:00	-5	-5.6	-6	-6.3	-6.3	-6.4	-6.4	-6.5	-6.4	-6.1	-6.1	-5.9	-5.6	-5	-4.9	-4.5	-4.5	-4.1	-3.8	-3.5	-3.5	-3.5	-3.4	-3.2	-2.6	-2.7	-2.6	-2.4	-2.2	-2.2	-2	-1.8
XZ009	申扎县	2020-01-04 16:00:00	-5.1	-5.5	-5.8	-6	-6	-6	-6.2	-6.3	-6.1	-5.9	-5.9	-5.8	-5.5	-5	-4.9	-4.5	-4.5	-4.1	-3.9	-3.5	-3.5	-3.5	-3.4	-3.2	-2.7	-2.7	-2.6	-2.4	-2.2	-2.2	-2	-1.8
XZ009	申扎县	2020-01-04 17:00:00	-5.7	-5.7	-5.8	-5.9	-5.8	-5.9	-5.9	-6.1	-6	-5.8	-5.8	-5.7	-5.4	-5	-4.8	-4.5	-4.5	-4.1	-3.9	-3.6	-3.5	-3.5	-3.4	-3.2	-2.7	-2.7	-2.7	-2.4	-2.2	-2.3	-2	-1.7
XZ009	申扎县	2020-01-04 18:00:00	-6.2	-6	-5.9	-5.9	-5.7	-5.7	-5.8	-5.9	-5.9	-5.7	-5.7	-5.5	-5.4	-4.9	-4.8	-4.5	-4.5	-4.1	-3.9	-3.6	-3.5	-3.5	-3.4	-3.2	-2.7	-2.7	-2.6	-2.4	-2.3	-2.3	-2	-1.7
XZ009	申扎县	2020-01-04 19:00:00	-6.7	-6.3	-6.1	-6	-5.7	-5.7	-5.7	-5.8	-5.7	-5.5	-5.5	-5.4	-5.3	-4.9	-4.7	-4.5	-4.5	-4.1	-3.9	-3.6	-3.5	-3.5	-3.4	-3.2	-2.7	-2.7	-2.7	-2.4	-2.3	-2.3	-2	-1.7
XZ009	申扎县	2020-01-04 20:00:00	-7.4	-6.7	-6.4	-6.2	-5.9	-5.7	-5.7	-5.7	-5.7	-5.5	-5.5	-5.4	-5.2	-4.8	-4.7	-4.5	-4.5	-4.1	-3.9	-3.6	-3.5	-3.5	-3.4	-3.3	-2.7	-2.7	-2.7	-2.5	-2.3	-2.3	-2	-1.7
XZ009	申扎县	2020-01-04 21:00:00	-7.7	-7	-6.7	-6.4	-6	-5.8	-5.7	-5.7	-5.6	-5.4	-5.4	-5.3	-5.1	-4.8	-4.7	-4.5	-4.5	-4	-3.9	-3.6	-3.5	-3.5	-3.4	-3.2	-2.7	-2.7	-2.7	-2.4	-2.3	-2.3	-2	-1.8
XZ009	申扎县	2020-01-04 22:00:00	-7.9	-7.2	-6.9	-6.5	-6.1	-5.9	-5.8	-5.8	-5.6	-5.4	-5.4	-5.3	-5.1	-4.7	-4.7	-4.4	-4.4	-4.1	-3.9	-3.5	-3.5	-3.5	-3.5	-3.3	-2.7	-2.7	-2.7	-2.5	-2.3	-2.3	-2	-1.7
XZ009	申扎县	2020-01-04 23:00:00	-8.2	-7.4	-7	-6.7	-6.2	-6	-5.8	-5.8	-5.6	-5.4	-5.4	-5.2	-5	-4.7	-4.6	-4.4	-4.4	-4	-3.9	-3.5	-3.5	-3.5	-3.4	-3.3	-2.7	-2.8	-2.7	-2.5	-2.3	-2.3	-2	-1.8
XZ009	申扎县	2020-01-05 00:00:00	-9	-7.9	-7.3	-6.9	-6.4	-6	-5.9	-5.9	-5.7	-5.4	-5.4	-5.2	-5	-4.7	-4.6	-4.4	-4.4	-4	-3.8	-3.5	-3.5	-3.5	-3.4	-3.2	-2.7	-2.7	-2.7	-2.5	-2.3	-2.3	-2.1	-1.8
XZ009	申扎县	2020-01-05 01:00:00	-9.4	-8.2	-7.6	-7.2	-6.5	-6.2	-6	-5.9	-5.7	-5.4	-5.4	-5.2	-5	-4.7	-4.5	-4.4	-4.4	-4	-3.8	-3.5	-3.5	-3.5	-3.4	-3.2	-2.7	-2.8	-2.7	-2.5	-2.3	-2.3	-2.1	-1.8
XZ009	申扎县	2020-01-05 02:00:00	-9.3	-8.4	-7.9	-7.4	-6.7	-6.4	-6.1	-6	-5.7	-5.5	-5.5	-5.3	-5.1	-4.6	-4.5	-4.4	-4.4	-4	-3.8	-3.5	-3.5	-3.5	-3.4	-3.2	-2.7	-2.8	-2.7	-2.5	-2.3	-2.3	-2.1	-1.8
XZ009	申扎县	2020-01-05 03:00:00	-9.2	-8.4	-7.9	-7.5	-6.9	-6.5	-6.2	-6.1	-5.9	-5.5	-5.5	-5.3	-5	-4.7	-4.5	-4.4	-4.4	-4	-3.8	-3.5	-3.5	-3.5	-3.4	-3.2	-2.7	-2.8	-2.7	-2.5	-2.3	-2.3	-2.1	-1.8
XZ009	申扎县	2020-01-05 04:00:00	-9.5	-8.5	-8	-7.6	-7	-6.5	-6.3	-6.2	-5.9	-5.6	-5.6	-5.4	-5.2	-4.7	-4.5	-4.4	-4.4	-4	-3.8	-3.5	-3.5	-3.5	-3.4	-3.2	-2.7	-2.7	-2.7	-2.5	-2.3	-2.3	-2.1	-1.8
XZ009	申扎县	2020-01-05 05:00:00	-9.7	-8.7	-8.2	-7.7	-7	-6.7	-6.4	-6.2	-5.9	-5.6	-5.6	-5.4	-5.2	-4.7	-4.5	-4.4	-4.4	-4	-3.7	-3.5	-3.5	-3.5	-3.4	-3.2	-2.7	-2.8	-2.7	-2.5	-2.3	-2.3	-2.1	-1.8
XZ009	申扎县	2020-01-05 06:00:00	-9.9	-8.9	-8.3	-7.8	-7.2	-6.7	-6.4	-6.3	-6	-5.7	-5.7	-5.4	-5.2	-4.7	-4.6	-4.4	-4.4	-4	-3.8	-3.5	-3.5	-3.4	-3.4	-3.2	-2.7	-2.7	-2.7	-2.5	-2.3	-2.3	-2.1	-1.8
XZ009	申扎县	2020-01-05 07:00:00	-10.4	-9	-8.4	-7.9	-7.3	-6.8	-6.5	-6.4	-6.1	-5.7	-5.7	-5.5	-5.2	-4.7	-4.6	-4.4	-4.4	-4	-3.8	-3.5	-3.5	-3.5	-3.4	-3.2	-2.7	-2.7	-2.7	-2.5	-2.3	-2.4	-2.1	-1.9
XZ009	申扎县	2020-01-05 08:00:00	-10.8	-9.4	-8.7	-8.2	-7.4	-6.9	-6.6	-6.5	-6.2	-5.8	-5.8	-5.5	-5.3	-4.7	-4.7	-4.4	-4.4	-4	-3.8	-3.5	-3.5	-3.5	-3.4	-3.2	-2.7	-2.8	-2.7	-2.5	-2.3	-2.4	-2.1	-1.8
XZ009	申扎县	2020-01-05 09:00:00	-11.2	-9.8	-9	-8.4	-7.6	-7.1	-6.7	-6.5	-6.2	-5.9	-5.9	-5.6	-5.3	-4.8	-4.7	-4.4	-4.4	-4	-3.8	-3.5	-3.5	-3.5	-3.4	-3.2	-2.7	-2.8	-2.7	-2.5	-2.3	-2.3	-2.1	-1.8
XZ009	申扎县	2020-01-05 10:00:00	-11	-9.9	-9.2	-8.5	-7.8	-7.2	-6.9	-6.6	-6.3	-5.9	-5.9	-5.7	-5.4	-4.8	-4.7	-4.4	-4.4	-4	-3.8	-3.5	-3.5	-3.5	-3.4	-3.2	-2.7	-2.8	-2.7	-2.5	-2.3	-2.3	-2.1	-1.8
XZ009	申扎县	2020-01-05 11:00:00	-10.4	-9.7	-9.2	-8.6	-7.9	-7.4	-7	-6.7	-6.4	-6	-6	-5.7	-5.4	-4.9	-4.7	-4.5	-4.4	-4	-3.9	-3.5	-3.5	-3.5	-3.4	-3.2	-2.7	-2.8	-2.7	-2.5	-2.3	-2.4	-2.1	-1.8
XZ009	申扎县	2020-01-05 12:00:00	-9.2	-9.2	-8.9	-8.5	-7.9	-7.4	-7	-6.9	-6.5	-6.1	-6.1	-5.8	-5.5	-4.9	-4.7	-4.5	-4.5	-4	-3.9	-3.5	-3.5	-3.5	-3.4	-3.3	-2.7	-2.8	-2.7	-2.5	-2.4	-2.4	-2.1	-1.9
XZ009	申扎县	2020-01-05 13:00:00	-7.9	-8.4	-8.4	-8.2	-7.7	-7.4	-7	-6.9	-6.5	-6.2	-6.2	-5.9	-5.5	-4.9	-4.8	-4.5	-4.5	-4.1	-3.9	-3.5	-3.5	-3.5	-3.4	-3.3	-2.7	-2.8	-2.7	-2.5	-2.3	-2.4	-2.1	-1.9
XZ009	申扎县	2020-01-05 14:00:00	-6.9	-7.5	-7.8	-7.8	-7.4	-7.2	-7	-6.9	-6.5	-6.2	-6.2	-5.9	-5.6	-5	-4.9	-4.5	-4.5	-4.2	-3.9	-3.6	-3.5	-3.5	-3.5	-3.3	-2.7	-2.8	-2.7	-2.5	-2.4	-2.4	-2.1	-1.9
XZ009	申扎县	2020-01-05 15:00:00	-6.2	-6.9	-7.2	-7.3	-7.1	-6.9	-6.8	-6.7	-6.5	-6.2	-6.2	-5.9	-5.6	-5	-4.9	-4.6	-4.5	-4.1	-3.9	-3.6	-3.6	-3.5	-3.5	-3.3	-2.7	-2.8	-2.7	-2.5	-2.4	-2.4	-2.1	-1.9
XZ009	申扎县	2020-01-05 16:00:00	-6.5	-6.7	-6.9	-7	-6.8	-6.7	-6.6	-6.6	-6.4	-6.1	-6.1	-5.9	-5.6	-5	-4.9	-4.6	-4.6	-4.2	-3.9	-3.6	-3.6	-3.5	-3.5	-3.3	-2.7	-2.8	-2.7	-2.5	-2.4	-2.4	-2.1	-1.9
XZ009	申扎县	2020-01-05 17:00:00	-7.4	-7	-6.9	-6.8	-6.6	-6.5	-6.4	-6.5	-6.3	-6	-6	-5.8	-5.5	-5	-4.9	-4.6	-4.6	-4.2	-3.9	-3.7	-3.6	-3.5	-3.5	-3.3	-2.7	-2.8	-2.7	-2.5	-2.4	-2.4	-2.1	-1.9
XZ009	申扎县	2020-01-05 18:00:00	-7.9	-7.2	-7	-6.9	-6.5	-6.4	-6.4	-6.4	-6.2	-5.9	-5.9	-5.7	-5.5	-5	-4.9	-4.6	-4.6	-4.2	-3.9	-3.7	-3.6	-3.5	-3.5	-3.3	-2.7	-2.8	-2.7	-2.5	-2.4	-2.4	-2.1	-1.9
XZ009	申扎县	2020-01-05 19:00:00	-8.6	-7.7	-7.2	-7	-6.6	-6.4	-6.3	-6.3	-6.1	-5.9	-5.9	-5.7	-5.5	-5	-4.9	-4.6	-4.6	-4.2	-3.9	-3.7	-3.6	-3.5	-3.5	-3.3	-2.7	-2.9	-2.7	-2.5	-2.4	-2.4	-2.2	-1.9
XZ009	申扎县	2020-01-05 20:00:00	-9.4	-8.1	-7.5	-7.2	-6.7	-6.4	-6.3	-6.2	-6	-5.9	-5.9	-5.7	-5.4	-5	-4.9	-4.6	-4.6	-4.2	-4	-3.7	-3.7	-3.6	-3.5	-3.4	-2.8	-2.9	-2.7	-2.5	-2.4	-2.4	-2.2	-1.9
XZ009	申扎县	2020-01-05 21:00:00	-9.8	-8.5	-7.9	-7.4	-6.9	-6.5	-6.3	-6.3	-6	-5.8	-5.8	-5.6	-5.4	-4.9	-4.8	-4.6	-4.5	-4.2	-3.9	-3.7	-3.6	-3.6	-3.5	-3.4	-2.8	-2.9	-2.7	-2.5	-2.4	-2.4	-2.2	-1.9
XZ009	申扎县	2020-01-05 22:00:00	-10.6	-9	-8.2	-7.7	-7	-6.7	-6.4	-6.3	-6.1	-5.8	-5.8	-5.6	-5.4	-5	-4.8	-4.6	-4.6	-4.2	-3.9	-3.7	-3.7	-3.6	-3.5	-3.4	-2.7	-2.9	-2.7	-2.5	-2.4	-2.4	-2.2	-1.9
XZ009	申扎县	2020-01-05 23:00:00	-11.2	-9.5	-8.7	-8	-7.3	-6.9	-6.5	-6.4	-6.2	-5.9	-5.9	-5.6	-5.4	-4.9	-4.8	-4.6	-4.5	-4.2	-3.9	-3.7	-3.6	-3.6	-3.5	-3.4	-2.8	-2.9	-2.7	-2.5	-2.4	-2.4	-2.2	-1.9
XZ009	申扎县	2020-01-06 00:00:00	-12.5	-10.3	-9.2	-8.4	-7.5	-7	-6.7	-6.5	-6.2	-5.9	-5.9	-5.7	-5.4	-4.9	-4.8	-4.5	-4.5	-4.2	-3.9	-3.7	-3.7	-3.6	-3.5	-3.4	-2.8	-2.9	-2.8	-2.5	-2.4	-2.4	-2.2	-1.9
XZ009	申扎县	2020-01-06 01:00:00	-13.5	-11	-9.8	-8.9	-7.9	-7.3	-6.9	-6.7	-6.3	-6	-6	-5.7	-5.4	-4.9	-4.8	-4.5	-4.5	-4.2	-3.9	-3.7	-3.6	-3.6	-3.5	-3.4	-2.8	-2.9	-2.7	-2.5	-2.4	-2.4	-2.2	-1.9
XZ009	申扎县	2020-01-06 02:00:00	-14.1	-11.7	-10.4	-9.4	-8.4	-7.6	-7.1	-6.9	-6.5	-6	-6	-5.8	-5.5	-5	-4.9	-4.6	-4.6	-4.2	-4	-3.7	-3.7	-3.6	-3.5	-3.4	-2.8	-2.9	-2.8	-2.6	-2.4	-2.4	-2.2	-1.9
XZ009	申扎县	2020-01-06 03:00:00	-14.2	-12	-10.7	-9.7	-8.7	-7.9	-7.4	-7	-6.7	-6.2	-6.2	-5.9	-5.6	-5	-4.8	-4.6	-4.6	-4.2	-4	-3.7	-3.6	-3.6	-3.5	-3.4	-2.8	-2.9	-2.8	-2.5	-2.4	-2.4	-2.2	-1.9
XZ009	申扎县	2020-01-06 04:00:00	-14.2	-12.2	-11	-10	-9	-8.2	-7.5	-7.2	-6.9	-6.4	-6.4	-6	-5.7	-5	-4.9	-4.6	-4.6	-4.2	-4	-3.7	-3.7	-3.6	-3.5	-3.4	-2.8	-2.9	-2.8	-2.5	-2.4	-2.4	-2.2	-1.9
XZ009	申扎县	2020-01-06 05:00:00	-14.2	-12.4	-11.2	-10.3	-9.2	-8.4	-7.8	-7.5	-7	-6.5	-6.5	-6.2	-5.8	-5.1	-4.9	-4.7	-4.6	-4.2	-4	-3.7	-3.7	-3.6	-3.5	-3.4	-2.8	-2.9	-2.8	-2.6	-2.4	-2.4	-2.2	-1.9
XZ009	申扎县	2020-01-06 06:00:00	-14.4	-12.5	-11.4	-10.5	-9.4	-8.6	-8	-7.7	-7.2	-6.7	-6.7	-6.3	-5.9	-5.2	-5	-4.7	-4.7	-4.3	-4	-3.7	-3.7	-3.6	-3.5	-3.4	-2.8	-2.9	-2.8	-2.6	-2.4	-2.4	-2.2	-1.9
XZ009	申扎县	2020-01-06 07:00:00	-14.7	-12.7	-11.6	-10.7	-9.6	-8.8	-8.2	-7.8	-7.3	-6.8	-6.8	-6.4	-6	-5.3	-5	-4.8	-4.7	-4.3	-4	-3.7	-3.7	-3.7	-3.6	-3.4	-2.8	-2.9	-2.8	-2.6	-2.4	-2.4	-2.2	-1.9
XZ009	申扎县	2020-01-06 08:00:00	-15.2	-13.1	-11.9	-10.9	-9.9	-9	-8.4	-8	-7.5	-6.9	-6.9	-6.5	-6.1	-5.4	-5.1	-4.9	-4.8	-4.3	-4	-3.8	-3.7	-3.7	-3.6	-3.4	-2.8	-2.9	-2.8	-2.6	-2.4	-2.4	-2.2	-1.9
XZ009	申扎县	2020-01-06 09:00:00	-15.9	-13.5	-12.2	-11.2	-10	-9.2	-8.5	-8.1	-7.6	-7	-7	-6.7	-6.2	-5.4	-5.2	-4.9	-4.8	-4.4	-4.1	-3.8	-3.7	-3.7	-3.6	-3.4	-2.9	-2.9	-2.8	-2.6	-2.4	-2.4	-2.2	-1.9
XZ009	申扎县	2020-01-06 10:00:00	-15.8	-13.8	-12.5	-11.5	-10.4	-9.4	-8.7	-8.3	-7.8	-7.2	-7.2	-6.8	-6.3	-5.5	-5.2	-5	-4.9	-4.4	-4.2	-3.8	-3.8	-3.7	-3.6	-3.4	-2.9	-2.9	-2.8	-2.6	-2.4	-2.4	-2.2	-1.9
XZ009	申扎县	2020-01-06 11:00:00	-13.2	-13	-12.4	-11.5	-10.5	-9.6	-8.9	-8.5	-7.9	-7.4	-7.4	-6.9	-6.4	-5.6	-5.4	-5	-4.9	-4.5	-4.2	-3.9	-3.8	-3.7	-3.7	-3.5	-2.9	-2.9	-2.8	-2.6	-2.5	-2.5	-2.2	-1.9
XZ009	申扎县	2020-01-06 12:00:00	-10	-11.3	-11.4	-11.1	-10.3	-9.6	-9	-8.6	-8.1	-7.5	-7.5	-7	-6.5	-5.7	-5.4	-5	-5	-4.5	-4.2	-3.9	-3.9	-3.8	-3.7	-3.5	-2.9	-2.9	-2.9	-2.6	-2.5	-2.5	-2.2	-1.9
XZ009	申扎县	2020-01-06 13:00:00	-6.8	-9.3	-10.1	-10.2	-9.8	-9.4	-8.9	-8.6	-8.2	-7.5	-7.5	-7.1	-6.7	-5.8	-5.5	-5.2	-5	-4.5	-4.3	-4	-3.9	-3.8	-3.7	-3.5	-2.9	-3	-2.9	-2.7	-2.5	-2.5	-2.2	-1.9
XZ009	申扎县	2020-01-06 14:00:00	-4	-7.2	-8.5	-9.1	-9	-8.9	-8.7	-8.5	-8	-7.6	-7.6	-7.2	-6.7	-5.9	-5.5	-5.2	-5.1	-4.6	-4.3	-4	-3.9	-3.8	-3.7	-3.5	-2.9	-3	-2.9	-2.7	-2.5	-2.5	-2.2	-1.9
XZ009	申扎县	2020-01-06 15:00:00	-3.7	-5.9	-7.1	-7.9	-8.2	-8.2	-8.2	-8.2	-7.9	-7.5	-7.5	-7.2	-6.7	-5.9	-5.6	-5.3	-5.2	-4.7	-4.4	-4	-3.9	-3.9	-3.7	-3.5	-2.9	-3	-2.9	-2.7	-2.5	-2.5	-2.2	-2
XZ009	申扎县	2020-01-06 16:00:00	-4.3	-5.7	-6.5	-7.2	-7.4	-7.7	-7.8	-7.9	-7.7	-7.4	-7.4	-7	-6.7	-5.9	-5.7	-5.4	-5.2	-4.7	-4.4	-4	-4	-3.9	-3.8	-3.6	-3	-3	-2.9	-2.7	-2.5	-2.5	-2.3	-2
XZ009	申扎县	2020-01-06 17:00:00	-4.8	-5.7	-6.3	-6.8	-7	-7.2	-7.4	-7.5	-7.4	-7.1	-7.1	-6.9	-6.6	-5.9	-5.7	-5.4	-5.2	-4.7	-4.4	-4.1	-4	-3.9	-3.8	-3.6	-3	-3	-2.9	-2.7	-2.5	-2.5	-2.3	-2
XZ009	申扎县	2020-01-06 18:00:00	-4.9	-5.7	-6.2	-6.5	-6.7	-6.9	-7	-7.2	-7.2	-6.9	-6.9	-6.7	-6.5	-5.9	-5.7	-5.4	-5.2	-4.8	-4.5	-4.1	-4	-3.9	-3.9	-3.6	-3	-3	-2.9	-2.7	-2.5	-2.5	-2.3	-2
XZ009	申扎县	2020-01-06 19:00:00	-5.7	-6	-6.2	-6.5	-6.5	-6.7	-6.8	-7	-6.9	-6.7	-6.7	-6.6	-6.4	-5.8	-5.6	-5.4	-5.2	-4.8	-4.5	-4.2	-4	-4	-3.9	-3.7	-3	-3	-3	-2.7	-2.5	-2.5	-2.3	-2
XZ009	申扎县	2020-01-06 20:00:00	-7.4	-6.7	-6.6	-6.6	-6.5	-6.5	-6.7	-6.8	-6.7	-6.5	-6.5	-6.4	-6.2	-5.7	-5.6	-5.3	-5.2	-4.8	-4.5	-4.2	-4.1	-4	-3.9	-3.7	-3	-3.1	-3	-2.7	-2.5	-2.5	-2.3	-2
XZ009	申扎县	2020-01-06 21:00:00	-8	-7.4	-7.1	-6.9	-6.7	-6.6	-6.6	-6.7	-6.6	-6.4	-6.4	-6.3	-6.1	-5.7	-5.5	-5.3	-5.2	-4.8	-4.5	-4.2	-4.1	-4	-3.9	-3.7	-3	-3.1	-3	-2.7	-2.5	-2.5	-2.4	-2
XZ009	申扎县	2020-01-06 22:00:00	-9.1	-8	-7.5	-7.2	-6.9	-6.7	-6.6	-6.7	-6.5	-6.4	-6.4	-6.2	-6	-5.6	-5.5	-5.2	-5.2	-4.7	-4.5	-4.2	-4.1	-4	-3.9	-3.7	-3	-3.2	-3	-2.8	-2.6	-2.6	-2.4	-2
XZ009	申扎县	2020-01-06 23:00:00	-10.3	-8.9	-8.1	-7.7	-7.2	-6.8	-6.7	-6.7	-6.5	-6.3	-6.3	-6.2	-6	-5.5	-5.4	-5.2	-5.2	-4.7	-4.5	-4.2	-4.1	-4	-3.9	-3.7	-3.1	-3.2	-3	-2.8	-2.6	-2.6	-2.4	-2
XZ009	申扎县	2020-01-07 00:00:00	-10.8	-9.4	-8.7	-8.1	-7.5	-7	-6.9	-6.8	-6.6	-6.3	-6.3	-6.2	-5.9	-5.5	-5.4	-5.2	-5.1	-4.7	-4.4	-4.2	-4.1	-4	-3.9	-3.7	-3.1	-3.2	-3	-2.8	-2.6	-2.6	-2.4	-2
XZ009	申扎县	2020-01-07 01:00:00	-11.4	-9.9	-9.1	-8.5	-7.8	-7.3	-7	-6.9	-6.7	-6.4	-6.4	-6.2	-5.9	-5.5	-5.4	-5.1	-5.1	-4.7	-4.5	-4.2	-4.1	-4	-3.9	-3.7	-3.1	-3.2	-3	-2.9	-2.6	-2.6	-2.4	-2.1
XZ009	申扎县	2020-01-07 02:00:00	-11.9	-10.4	-9.5	-8.9	-8.1	-7.5	-7.2	-7	-6.7	-6.4	-6.4	-6.2	-6	-5.5	-5.4	-5.1	-5.1	-4.7	-4.4	-4.2	-4.1	-4	-3.9	-3.7	-3.2	-3.2	-3	-2.9	-2.7	-2.6	-2.4	-2.1
XZ009	申扎县	2020-01-07 03:00:00	-11.5	-10.5	-9.7	-9.2	-8.4	-7.8	-7.4	-7.2	-6.9	-6.5	-6.5	-6.2	-6	-5.5	-5.4	-5.1	-5	-4.7	-4.4	-4.1	-4.1	-4	-3.9	-3.7	-3.1	-3.2	-3	-2.9	-2.7	-2.7	-2.4	-2.1
XZ009	申扎县	2020-01-07 04:00:00	-11.8	-10.5	-9.9	-9.3	-8.5	-7.9	-7.5	-7.4	-7	-6.6	-6.6	-6.4	-6	-5.5	-5.4	-5.1	-5	-4.7	-4.4	-4.1	-4.1	-4	-3.9	-3.7	-3.1	-3.2	-3.1	-2.9	-2.7	-2.6	-2.4	-2.1
XZ009	申扎县	2020-01-07 05:00:00	-12.7	-11	-10.2	-9.5	-8.7	-8.1	-7.7	-7.4	-7.1	-6.7	-6.7	-6.4	-6.1	-5.5	-5.4	-5.1	-5	-4.7	-4.4	-4.1	-4.1	-4	-3.9	-3.7	-3.1	-3.2	-3.1	-2.9	-2.7	-2.7	-2.4	-2.1
XZ009	申扎县	2020-01-07 06:00:00	-13	-11.4	-10.5	-9.8	-8.9	-8.3	-7.8	-7.5	-7.2	-6.8	-6.8	-6.5	-6.2	-5.5	-5.4	-5.1	-5.1	-4.7	-4.4	-4.1	-4.1	-4	-4	-3.7	-3.1	-3.2	-3.1	-2.9	-2.7	-2.7	-2.4	-2.1
XZ009	申扎县	2020-01-07 07:00:00	-13.2	-11.7	-10.8	-10	-9.2	-8.5	-8	-7.7	-7.4	-6.9	-6.9	-6.5	-6.2	-5.6	-5.4	-5.2	-5.1	-4.7	-4.4	-4.1	-4.1	-4	-4	-3.7	-3.2	-3.2	-3.1	-2.9	-2.7	-2.7	-2.4	-2.1
XZ009	申扎县	2020-01-07 08:00:00	-13	-11.8	-11	-10.3	-9.4	-8.7	-8.2	-7.9	-7.5	-7	-7	-6.7	-6.3	-5.7	-5.5	-5.2	-5.1	-4.7	-4.4	-4.2	-4.1	-4	-4	-3.7	-3.1	-3.2	-3.1	-2.9	-2.7	-2.7	-2.4	-2.1
XZ009	申扎县	2020-01-07 09:00:00	-12.9	-11.8	-11	-10.4	-9.5	-8.8	-8.3	-8	-7.6	-7.1	-7.1	-6.7	-6.4	-5.7	-5.5	-5.2	-5.2	-4.7	-4.5	-4.2	-4.1	-4	-4	-3.8	-3.2	-3.2	-3.1	-2.9	-2.7	-2.7	-2.4	-2.2
XZ009	申扎县	2020-01-07 10:00:00	-13	-11.9	-11.1	-10.4	-9.6	-8.9	-8.4	-8.1	-7.7	-7.2	-7.2	-6.9	-6.5	-5.7	-5.6	-5.3	-5.2	-4.7	-4.5	-4.2	-4.1	-4	-4	-3.8	-3.2	-3.2	-3.1	-2.9	-2.7	-2.7	-2.4	-2.2
XZ009	申扎县	2020-01-07 11:00:00	-10.5	-11	-10.9	-10.4	-9.6	-9	-8.5	-8.2	-7.8	-7.3	-7.3	-6.9	-6.5	-5.9	-5.6	-5.3	-5.2	-4.8	-4.5	-4.2	-4.1	-4.1	-4	-3.8	-3.2	-3.2	-3.1	-2.9	-2.7	-2.7	-2.5	-2.2
XZ009	申扎县	2020-01-07 12:00:00	-6.8	-8.9	-9.6	-9.7	-9.3	-8.9	-8.5	-8.3	-7.9	-7.4	-7.4	-7	-6.7	-5.9	-5.7	-5.4	-5.3	-4.9	-4.5	-4.2	-4.2	-4.1	-4	-3.8	-3.2	-3.2	-3.1	-2.9	-2.7	-2.7	-2.5	-2.2
XZ009	申扎县	2020-01-07 13:00:00	-3.6	-6.6	-7.9	-8.5	-8.5	-8.4	-8.3	-8.2	-7.9	-7.4	-7.4	-7.1	-6.7	-5.9	-5.7	-5.4	-5.3	-4.9	-4.6	-4.2	-4.2	-4.1	-4	-3.8	-3.2	-3.2	-3.1	-2.9	-2.7	-2.7	-2.5	-2.2
XZ009	申扎县	2020-01-07 14:00:00	-0.4	-4.2	-6	-7.1	-7.5	-7.7	-7.9	-7.9	-7.7	-7.3	-7.3	-7	-6.7	-6	-5.7	-5.4	-5.4	-4.9	-4.6	-4.3	-4.2	-4.1	-4	-3.8	-3.2	-3.3	-3.2	-2.9	-2.7	-2.7	-2.5	-2.2
XZ009	申扎县	2020-01-07 15:00:00	-1.2	-3.3	-4.7	-5.8	-6.4	-6.9	-7.2	-7.5	-7.4	-7.2	-7.2	-6.9	-6.7	-6	-5.8	-5.5	-5.4	-4.9	-4.6	-4.3	-4.2	-4.2	-4	-3.9	-3.2	-3.3	-3.2	-2.9	-2.7	-2.7	-2.5	-2.2
XZ009	申扎县	2020-01-07 16:00:00	-1.6	-3.5	-4.4	-5.2	-5.7	-6.2	-6.7	-7	-7	-6.9	-6.9	-6.7	-6.5	-5.9	-5.8	-5.5	-5.4	-4.9	-4.7	-4.3	-4.3	-4.2	-4.1	-3.9	-3.2	-3.3	-3.2	-3	-2.7	-2.7	-2.5	-2.2
XZ009	申扎县	2020-01-07 17:00:00	-2	-3.2	-4.1	-4.8	-5.3	-5.8	-6.2	-6.5	-6.6	-6.5	-6.5	-6.5	-6.3	-5.9	-5.7	-5.4	-5.4	-5	-4.7	-4.4	-4.3	-4.2	-4.1	-3.9	-3.2	-3.3	-3.2	-3	-2.7	-2.8	-2.5	-2.2
XZ009	申扎县	2020-01-07 18:00:00	-3	-3.7	-4.2	-4.7	-5	-5.4	-5.9	-6.2	-6.3	-6.3	-6.3	-6.2	-6.1	-5.7	-5.6	-5.4	-5.4	-4.9	-4.7	-4.4	-4.3	-4.2	-4.1	-3.9	-3.3	-3.4	-3.2	-3	-2.8	-2.7	-2.5	-2.2
XZ009	申扎县	2020-01-07 19:00:00	-4	-4.2	-4.4	-4.7	-4.9	-5.2	-5.6	-5.9	-6	-6	-6	-6	-5.9	-5.6	-5.5	-5.3	-5.3	-4.9	-4.6	-4.4	-4.3	-4.2	-4.1	-3.9	-3.3	-3.4	-3.2	-3	-2.8	-2.8	-2.5	-2.2
XZ009	申扎县	2020-01-07 20:00:00	-5.5	-5	-4.9	-5	-5	-5.2	-5.4	-5.7	-5.8	-5.8	-5.8	-5.8	-5.7	-5.5	-5.5	-5.2	-5.2	-4.9	-4.6	-4.3	-4.3	-4.2	-4.1	-3.9	-3.3	-3.4	-3.2	-3	-2.8	-2.8	-2.5	-2.2
XZ009	申扎县	2020-01-07 21:00:00	-6.9	-6	-5.6	-5.5	-5.2	-5.3	-5.4	-5.7	-5.7	-5.7	-5.7	-5.7	-5.6	-5.4	-5.4	-5.2	-5.2	-4.8	-4.6	-4.3	-4.3	-4.2	-4.1	-3.9	-3.3	-3.4	-3.2	-3	-2.8	-2.8	-2.5	-2.2
XZ009	申扎县	2020-01-07 22:00:00	-7.6	-6.7	-6.2	-5.9	-5.6	-5.5	-5.5	-5.7	-5.7	-5.5	-5.5	-5.5	-5.5	-5.3	-5.2	-5.1	-5.1	-4.7	-4.5	-4.2	-4.2	-4.2	-4.1	-3.9	-3.3	-3.4	-3.2	-3	-2.9	-2.8	-2.5	-2.2
XZ009	申扎县	2020-01-07 23:00:00	-8.7	-7.4	-6.8	-6.4	-5.9	-5.7	-5.7	-5.7	-5.7	-5.5	-5.5	-5.5	-5.4	-5.2	-5.2	-5	-5	-4.7	-4.5	-4.2	-4.2	-4.2	-4.1	-3.9	-3.3	-3.4	-3.2	-3	-2.9	-2.9	-2.5	-2.3
XZ009	申扎县	2020-01-08 00:00:00	-8.5	-7.7	-7.2	-6.8	-6.3	-6	-5.9	-5.9	-5.7	-5.6	-5.6	-5.5	-5.4	-5.1	-5.1	-5	-5	-4.7	-4.4	-4.2	-4.2	-4.1	-4	-3.9	-3.3	-3.4	-3.2	-3	-2.9	-2.8	-2.5	-2.3
XZ009	申扎县	2020-01-08 01:00:00	-8.7	-7.9	-7.4	-7	-6.5	-6.2	-6	-6	-5.9	-5.7	-5.7	-5.5	-5.4	-5.1	-5	-4.9	-4.9	-4.6	-4.4	-4.2	-4.1	-4.1	-4	-3.9	-3.3	-3.4	-3.2	-3	-2.8	-2.9	-2.6	-2.3
XZ009	申扎县	2020-01-08 02:00:00	-9	-8.2	-7.7	-7.3	-6.7	-6.4	-6.2	-6.2	-5.9	-5.7	-5.7	-5.5	-5.4	-5	-5	-4.9	-4.9	-4.5	-4.4	-4.1	-4.1	-4.1	-4	-3.9	-3.3	-3.4	-3.2	-3	-2.9	-2.9	-2.6	-2.3
XZ009	申扎县	2020-01-08 03:00:00	-9.5	-8.5	-8	-7.5	-7	-6.5	-6.3	-6.3	-6	-5.8	-5.8	-5.6	-5.4	-5	-5	-4.8	-4.9	-4.5	-4.4	-4	-4	-4	-4	-3.8	-3.2	-3.3	-3.2	-3	-2.8	-2.9	-2.6	-2.3
XZ009	申扎县	2020-01-08 04:00:00	-9.4	-8.7	-8.2	-7.8	-7.2	-6.8	-6.5	-6.4	-6.1	-5.9	-5.9	-5.7	-5.5	-5	-5	-4.9	-4.9	-4.5	-4.3	-4	-4	-4	-4	-3.8	-3.2	-3.3	-3.2	-3	-2.9	-2.8	-2.6	-2.3
XZ009	申扎县	2020-01-08 05:00:00	-9.3	-8.7	-8.2	-7.9	-7.3	-6.9	-6.6	-6.5	-6.2	-5.9	-5.9	-5.7	-5.5	-5.1	-5	-4.8	-4.9	-4.5	-4.3	-4	-4	-4	-4	-3.8	-3.2	-3.3	-3.2	-3	-2.9	-2.9	-2.6	-2.3
XZ009	申扎县	2020-01-08 06:00:00	-9.7	-8.9	-8.4	-8	-7.4	-7	-6.7	-6.6	-6.4	-6	-6	-5.8	-5.5	-5.1	-5	-4.9	-4.9	-4.5	-4.3	-4	-4	-4	-3.9	-3.8	-3.2	-3.3	-3.2	-3	-2.8	-2.9	-2.6	-2.3
XZ009	申扎县	2020-01-08 07:00:00	-10.1	-9.1	-8.5	-8.2	-7.5	-7.1	-6.8	-6.7	-6.4	-6.1	-6.1	-5.9	-5.6	-5.2	-5	-4.9	-4.9	-4.5	-4.3	-4	-4	-4	-3.9	-3.8	-3.2	-3.3	-3.2	-3	-2.8	-2.9	-2.6	-2.3
XZ009	申扎县	2020-01-08 08:00:00	-11	-9.7	-8.9	-8.4	-7.7	-7.2	-7	-6.8	-6.5	-6.2	-6.2	-5.9	-5.7	-5.2	-5.1	-4.9	-4.9	-4.5	-4.3	-4	-4	-4	-3.9	-3.8	-3.2	-3.3	-3.2	-3	-2.9	-2.9	-2.5	-2.3
XZ009	申扎县	2020-01-08 09:00:00	-11.9	-10.3	-9.4	-8.8	-8	-7.5	-7.1	-6.9	-6.6	-6.2	-6.2	-6	-5.7	-5.2	-5.1	-4.9	-4.9	-4.5	-4.3	-4	-4	-4	-3.9	-3.8	-3.2	-3.2	-3.2	-3	-2.8	-2.8	-2.6	-2.3
XZ009	申扎县	2020-01-08 10:00:00	-12.2	-10.7	-9.9	-9.2	-8.4	-7.7	-7.3	-7.1	-6.7	-6.4	-6.4	-6.1	-5.8	-5.2	-5.1	-4.9	-4.9	-4.5	-4.3	-4	-4	-4	-3.9	-3.7	-3.2	-3.3	-3.2	-3	-2.8	-2.8	-2.6	-2.3
XZ009	申扎县	2020-01-08 11:00:00	-10.5	-10.2	-9.8	-9.3	-8.5	-7.9	-7.5	-7.2	-6.9	-6.5	-6.5	-6.2	-5.9	-5.3	-5.2	-4.9	-4.9	-4.5	-4.3	-4	-4	-4	-3.9	-3.7	-3.2	-3.3	-3.2	-3	-2.8	-2.8	-2.6	-2.3
XZ009	申扎县	2020-01-08 12:00:00	-7.6	-8.9	-9.2	-9	-8.4	-8	-7.6	-7.4	-7	-6.6	-6.6	-6.3	-5.9	-5.4	-5.2	-5	-5	-4.5	-4.3	-4	-4	-4	-3.9	-3.7	-3.2	-3.3	-3.2	-3	-2.8	-2.8	-2.6	-2.3
XZ009	申扎县	2020-01-08 13:00:00	-4.9	-6.9	-7.7	-8	-7.9	-7.7	-7.5	-7.4	-7	-6.7	-6.7	-6.4	-6	-5.4	-5.2	-5	-5	-4.5	-4.4	-4	-4	-4	-3.9	-3.8	-3.2	-3.3	-3.2	-3	-2.8	-2.8	-2.6	-2.3
XZ009	申扎县	2020-01-08 14:00:00	-4.6	-5.9	-6.6	-7	-7.1	-7.2	-7.2	-7.2	-7	-6.6	-6.6	-6.4	-6.1	-5.5	-5.3	-5	-5	-4.6	-4.4	-4	-4	-4	-3.9	-3.7	-3.2	-3.2	-3.2	-3	-2.8	-2.8	-2.6	-2.3
XZ009	申扎县	2020-01-08 15:00:00	-2.9	-5	-5.9	-6.4	-6.5	-6.7	-6.8	-6.9	-6.8	-6.5	-6.5	-6.3	-6	-5.5	-5.4	-5.1	-5	-4.6	-4.4	-4.1	-4	-4	-4	-3.8	-3.2	-3.3	-3.2	-3	-2.8	-2.8	-2.6	-2.3
XZ009	申扎县	2020-01-08 16:00:00	-2.2	-4	-4.9	-5.6	-5.9	-6.2	-6.4	-6.6	-6.5	-6.4	-6.4	-6.2	-6	-5.5	-5.4	-5.1	-5	-4.7	-4.4	-4.1	-4.1	-4	-4	-3.8	-3.2	-3.3	-3.2	-3	-2.8	-2.9	-2.6	-2.3
XZ009	申扎县	2020-01-08 17:00:00	-2.5	-3.5	-4.3	-4.9	-5.2	-5.7	-6	-6.2	-6.2	-6.1	-6.1	-6	-5.9	-5.4	-5.4	-5	-5.1	-4.7	-4.4	-4.1	-4.1	-4	-4	-3.8	-3.2	-3.3	-3.2	-3	-2.8	-2.8	-2.6	-2.3
XZ009	申扎县	2020-01-08 18:00:00	-3.2	-3.8	-4.2	-4.7	-4.9	-5.2	-5.6	-5.9	-6	-5.9	-5.9	-5.9	-5.7	-5.4	-5.3	-5	-5	-4.7	-4.4	-4.1	-4.1	-4	-4	-3.8	-3.2	-3.3	-3.2	-3	-2.8	-2.9	-2.6	-2.3
XZ009	申扎县	2020-01-08 19:00:00	-4.2	-4.2	-4.4	-4.7	-4.8	-5	-5.3	-5.7	-5.7	-5.7	-5.7	-5.6	-5.5	-5.3	-5.2	-5	-5	-4.6	-4.4	-4.2	-4.1	-4	-4	-3.8	-3.2	-3.3	-3.2	-3	-2.9	-2.8	-2.6	-2.3
XZ009	申扎县	2020-01-08 20:00:00	-5.4	-4.9	-4.8	-4.9	-4.8	-5	-5.2	-5.5	-5.5	-5.5	-5.5	-5.5	-5.4	-5.2	-5.1	-4.9	-5	-4.6	-4.4	-4.1	-4.1	-4	-4	-3.8	-3.2	-3.3	-3.2	-3	-2.9	-2.9	-2.6	-2.3
XZ009	申扎县	2020-01-08 21:00:00	-6.4	-5.7	-5.4	-5.2	-5	-5	-5.1	-5.4	-5.4	-5.4	-5.4	-5.4	-5.3	-5	-5	-4.9	-4.9	-4.5	-4.4	-4.1	-4.1	-4	-4	-3.8	-3.2	-3.4	-3.2	-3	-2.8	-2.8	-2.6	-2.3
XZ009	申扎县	2020-01-08 22:00:00	-7.6	-6.4	-6	-5.7	-5.3	-5.2	-5.2	-5.4	-5.4	-5.2	-5.2	-5.2	-5.2	-5	-5	-4.8	-4.9	-4.5	-4.3	-4	-4	-4	-4	-3.8	-3.2	-3.3	-3.2	-3	-2.9	-2.9	-2.6	-2.3
XZ009	申扎县	2020-01-08 23:00:00	-8.4	-7.2	-6.5	-6.2	-5.7	-5.4	-5.4	-5.4	-5.4	-5.2	-5.2	-5.2	-5	-4.9	-4.9	-4.7	-4.8	-4.5	-4.3	-4	-4	-4	-4	-3.8	-3.2	-3.3	-3.2	-3	-2.9	-2.9	-2.6	-2.3
XZ009	申扎县	2020-01-09 00:00:00	-8.9	-7.6	-7	-6.5	-6	-5.7	-5.5	-5.5	-5.4	-5.3	-5.3	-5.2	-5.1	-4.9	-4.9	-4.7	-4.7	-4.4	-4.2	-4	-4	-4	-4	-3.8	-3.2	-3.3	-3.2	-3	-2.9	-2.9	-2.6	-2.3
XZ009	申扎县	2020-01-09 01:00:00	-9.4	-8.1	-7.5	-6.9	-6.4	-6	-5.8	-5.7	-5.5	-5.3	-5.3	-5.2	-5	-4.8	-4.8	-4.7	-4.7	-4.4	-4.2	-4	-4	-3.9	-3.9	-3.7	-3.2	-3.3	-3.2	-3	-2.9	-2.9	-2.6	-2.4
XZ009	申扎县	2020-01-09 02:00:00	-9.9	-8.5	-7.9	-7.3	-6.7	-6.2	-6	-5.9	-5.7	-5.4	-5.4	-5.3	-5.1	-4.8	-4.8	-4.6	-4.7	-4.4	-4.2	-3.9	-3.9	-3.9	-3.9	-3.7	-3.2	-3.3	-3.2	-3	-2.9	-2.9	-2.6	-2.3
XZ009	申扎县	2020-01-09 03:00:00	-10.2	-9	-8.2	-7.7	-7	-6.5	-6.2	-6	-5.8	-5.5	-5.5	-5.4	-5.2	-4.8	-4.8	-4.6	-4.7	-4.3	-4.2	-3.9	-3.9	-3.9	-3.9	-3.7	-3.2	-3.3	-3.2	-3	-2.8	-2.9	-2.6	-2.4
XZ009	申扎县	2020-01-09 04:00:00	-9.7	-8.9	-8.4	-7.9	-7.2	-6.7	-6.4	-6.2	-5.9	-5.6	-5.6	-5.4	-5.2	-4.8	-4.8	-4.6	-4.6	-4.3	-4.1	-3.9	-3.9	-3.9	-3.9	-3.7	-3.2	-3.3	-3.2	-3	-2.8	-2.9	-2.6	-2.3
XZ009	申扎县	2020-01-09 05:00:00	-10	-9	-8.5	-8	-7.4	-6.9	-6.5	-6.4	-6	-5.7	-5.7	-5.5	-5.3	-4.9	-4.8	-4.6	-4.7	-4.3	-4.1	-3.9	-3.9	-3.9	-3.9	-3.7	-3.1	-3.2	-3.2	-3	-2.8	-2.9	-2.6	-2.3
XZ009	申扎县	2020-01-09 06:00:00	-10.1	-9.2	-8.7	-8.2	-7.5	-7	-6.7	-6.5	-6.2	-5.9	-5.9	-5.6	-5.4	-4.9	-4.9	-4.7	-4.7	-4.3	-4.1	-3.9	-3.9	-3.9	-3.9	-3.7	-3.1	-3.2	-3.2	-3	-2.8	-2.8	-2.6	-2.3
XZ009	申扎县	2020-01-09 07:00:00	-10.5	-9.5	-8.9	-8.4	-7.7	-7.2	-6.8	-6.6	-6.4	-6	-6	-5.7	-5.4	-5	-4.9	-4.7	-4.7	-4.3	-4.1	-3.9	-3.9	-3.9	-3.9	-3.7	-3.1	-3.2	-3.2	-3	-2.8	-2.9	-2.6	-2.3
XZ009	申扎县	2020-01-09 08:00:00	-10.8	-9.7	-9	-8.5	-7.9	-7.3	-6.9	-6.7	-6.4	-6	-6	-5.8	-5.5	-5	-4.9	-4.7	-4.7	-4.3	-4.1	-3.9	-3.9	-3.9	-3.8	-3.7	-3.1	-3.2	-3.2	-2.9	-2.8	-2.8	-2.6	-2.3
XZ009	申扎县	2020-01-09 09:00:00	-11.4	-10	-9.4	-8.8	-8	-7.5	-7	-6.9	-6.5	-6.2	-6.2	-5.9	-5.6	-5	-4.9	-4.7	-4.7	-4.4	-4.1	-3.9	-3.9	-3.9	-3.8	-3.7	-3.1	-3.2	-3.2	-2.9	-2.8	-2.8	-2.6	-2.3
XZ009	申扎县	2020-01-09 10:00:00	-11.5	-10.4	-9.7	-9	-8.2	-7.7	-7.2	-7	-6.7	-6.3	-6.3	-6	-5.7	-5.1	-5	-4.7	-4.7	-4.4	-4.2	-3.9	-3.9	-3.9	-3.8	-3.7	-3.1	-3.2	-3.1	-3	-2.8	-2.8	-2.6	-2.3
XZ009	申扎县	2020-01-09 11:00:00	-9.6	-9.8	-9.5	-9.1	-8.4	-7.8	-7.4	-7.2	-6.8	-6.4	-6.4	-6	-5.7	-5.2	-5	-4.8	-4.8	-4.4	-4.2	-3.9	-3.9	-3.9	-3.8	-3.7	-3.1	-3.2	-3.1	-2.9	-2.8	-2.8	-2.6	-2.3
XZ009	申扎县	2020-01-09 12:00:00	-6.6	-8.2	-8.6	-8.6	-8.2	-7.8	-7.5	-7.2	-6.9	-6.5	-6.5	-6.2	-5.8	-5.2	-5.1	-4.9	-4.8	-4.4	-4.2	-3.9	-3.9	-3.9	-3.9	-3.7	-3.1	-3.2	-3.1	-2.9	-2.8	-2.8	-2.6	-2.3
XZ009	申扎县	2020-01-09 13:00:00	-4.7	-6.6	-7.4	-7.7	-7.6	-7.4	-7.3	-7.2	-6.9	-6.5	-6.5	-6.2	-5.9	-5.3	-5.2	-4.9	-4.9	-4.4	-4.2	-3.9	-3.9	-3.9	-3.9	-3.7	-3.1	-3.2	-3.1	-2.9	-2.8	-2.8	-2.5	-2.3
XZ009	申扎县	2020-01-09 14:00:00	-3.2	-5.2	-6.2	-6.7	-6.9	-6.9	-7	-7	-6.8	-6.5	-6.5	-6.2	-5.9	-5.4	-5.2	-4.9	-4.9	-4.5	-4.2	-4	-4	-3.9	-3.9	-3.7	-3.1	-3.2	-3.1	-2.9	-2.8	-2.8	-2.6	-2.3
XZ009	申扎县	2020-01-09 15:00:00	-2.5	-4.3	-5.2	-5.8	-6.1	-6.4	-6.5	-6.7	-6.5	-6.4	-6.4	-6.2	-5.9	-5.4	-5.2	-5	-4.9	-4.5	-4.3	-4	-4	-3.9	-3.9	-3.7	-3.1	-3.2	-3.1	-2.9	-2.8	-2.8	-2.6	-2.3
XZ009	申扎县	2020-01-09 16:00:00	-1.9	-3.6	-4.5	-5.2	-5.5	-5.8	-6.1	-6.4	-6.3	-6.2	-6.2	-6	-5.8	-5.4	-5.2	-5	-4.9	-4.5	-4.3	-4	-4	-3.9	-3.9	-3.7	-3.1	-3.2	-3.2	-3	-2.8	-2.8	-2.5	-2.3
XZ009	申扎县	2020-01-09 17:00:00	-2.3	-3.4	-4	-4.7	-5	-5.4	-5.7	-6	-6	-5.9	-5.9	-5.9	-5.7	-5.3	-5.2	-5	-4.9	-4.5	-4.3	-4	-4	-4	-3.9	-3.7	-3.1	-3.2	-3.2	-3	-2.8	-2.8	-2.6	-2.3
XZ009	申扎县	2020-01-09 18:00:00	-3.1	-3.7	-4	-4.4	-4.7	-5	-5.4	-5.7	-5.7	-5.7	-5.7	-5.7	-5.5	-5.2	-5.1	-4.9	-4.9	-4.5	-4.3	-4	-4	-3.9	-3.9	-3.7	-3.2	-3.2	-3.2	-3	-2.8	-2.8	-2.6	-2.3
XZ009	申扎县	2020-01-09 19:00:00	-4	-4	-4.2	-4.5	-4.6	-4.9	-5.1	-5.4	-5.5	-5.5	-5.5	-5.4	-5.4	-5.1	-5	-4.9	-4.9	-4.5	-4.3	-4	-4	-4	-3.9	-3.7	-3.2	-3.2	-3.2	-3	-2.8	-2.8	-2.6	-2.3
XZ009	申扎县	2020-01-09 20:00:00	-5.2	-4.8	-4.6	-4.7	-4.7	-4.8	-5	-5.3	-5.3	-5.3	-5.3	-5.3	-5.2	-5	-5	-4.9	-4.9	-4.5	-4.3	-4	-4	-4	-3.9	-3.7	-3.2	-3.2	-3.2	-3	-2.8	-2.8	-2.6	-2.3
XZ009	申扎县	2020-01-09 21:00:00	-6	-5.4	-5.2	-5	-4.9	-4.9	-5	-5.2	-5.2	-5.2	-5.2	-5.2	-5.1	-4.9	-4.9	-4.7	-4.8	-4.4	-4.3	-4	-4	-4	-3.9	-3.7	-3.2	-3.3	-3.2	-3	-2.9	-2.8	-2.6	-2.3
XZ009	申扎县	2020-01-09 22:00:00	-6.6	-5.9	-5.5	-5.4	-5.1	-5	-5	-5.2	-5.2	-5.1	-5.1	-5.1	-5	-4.9	-4.9	-4.7	-4.7	-4.4	-4.2	-3.9	-4	-4	-3.9	-3.7	-3.2	-3.3	-3.2	-3	-2.8	-2.9	-2.6	-2.3
XZ009	申扎县	2020-01-09 23:00:00	-6.7	-6.2	-5.9	-5.7	-5.3	-5.2	-5.1	-5.2	-5.2	-5	-5	-5	-4.9	-4.8	-4.7	-4.6	-4.7	-4.4	-4.2	-3.9	-4	-3.9	-3.9	-3.7	-3.2	-3.3	-3.2	-3	-2.9	-2.9	-2.6	-2.4
XZ009	申扎县	2020-01-10 00:00:00	-6.7	-6.3	-6	-5.9	-5.5	-5.3	-5.2	-5.3	-5.2	-5.1	-5.1	-5	-4.9	-4.7	-4.7	-4.5	-4.7	-4.3	-4.1	-3.9	-3.9	-3.9	-3.9	-3.7	-3.2	-3.3	-3.2	-3	-2.8	-2.9	-2.6	-2.3
XZ009	申扎县	2020-01-10 01:00:00	-7.2	-6.5	-6.2	-6	-5.6	-5.4	-5.4	-5.4	-5.3	-5.1	-5.1	-5	-4.9	-4.7	-4.7	-4.5	-4.6	-4.2	-4.1	-3.9	-3.9	-3.9	-3.9	-3.7	-3.2	-3.2	-3.2	-3	-2.8	-2.9	-2.6	-2.4
XZ009	申扎县	2020-01-10 02:00:00	-8.1	-7	-6.5	-6.2	-5.8	-5.5	-5.4	-5.4	-5.3	-5.1	-5.1	-5	-4.9	-4.7	-4.6	-4.5	-4.5	-4.2	-4	-3.9	-3.9	-3.9	-3.8	-3.7	-3.2	-3.2	-3.2	-3	-2.9	-2.9	-2.6	-2.4
XZ009	申扎县	2020-01-10 03:00:00	-8.9	-7.6	-7	-6.5	-6	-5.7	-5.5	-5.5	-5.4	-5.2	-5.2	-5	-4.9	-4.6	-4.6	-4.5	-4.5	-4.2	-4	-3.8	-3.8	-3.9	-3.8	-3.7	-3.1	-3.2	-3.2	-3	-2.8	-2.9	-2.6	-2.3
XZ009	申扎县	2020-01-10 04:00:00	-9.2	-8	-7.3	-6.9	-6.3	-5.9	-5.7	-5.6	-5.5	-5.2	-5.2	-5	-4.9	-4.6	-4.6	-4.4	-4.5	-4.2	-4	-3.8	-3.8	-3.8	-3.8	-3.6	-3.1	-3.2	-3.2	-3	-2.8	-2.8	-2.6	-2.4
XZ009	申扎县	2020-01-10 05:00:00	-9.5	-8.3	-7.6	-7.1	-6.5	-6.1	-5.9	-5.7	-5.5	-5.3	-5.3	-5.2	-5	-4.6	-4.6	-4.4	-4.5	-4.2	-4	-3.8	-3.8	-3.8	-3.8	-3.6	-3.1	-3.2	-3.1	-3	-2.8	-2.8	-2.6	-2.3
XZ009	申扎县	2020-01-10 06:00:00	-9.9	-8.6	-7.9	-7.4	-6.7	-6.3	-6	-5.9	-5.7	-5.4	-5.4	-5.2	-5	-4.7	-4.6	-4.4	-4.5	-4.2	-4	-3.7	-3.8	-3.8	-3.8	-3.6	-3.1	-3.2	-3.2	-3	-2.8	-2.8	-2.6	-2.3
XZ009	申扎县	2020-01-10 07:00:00	-10.5	-9	-8.2	-7.7	-7	-6.5	-6.2	-6	-5.8	-5.5	-5.5	-5.2	-5	-4.7	-4.6	-4.4	-4.5	-4.2	-4	-3.7	-3.7	-3.7	-3.7	-3.6	-3	-3.2	-3.1	-2.9	-2.8	-2.8	-2.5	-2.3
XZ009	申扎县	2020-01-10 08:00:00	-11.4	-9.6	-8.7	-8	-7.2	-6.7	-6.4	-6.2	-5.9	-5.5	-5.5	-5.4	-5.1	-4.7	-4.6	-4.4	-4.5	-4.2	-4	-3.7	-3.7	-3.7	-3.7	-3.6	-3	-3.2	-3.1	-2.9	-2.8	-2.8	-2.6	-2.3
XZ009	申扎县	2020-01-10 09:00:00	-12.1	-10.2	-9.2	-8.4	-7.6	-7	-6.6	-6.4	-6	-5.7	-5.7	-5.4	-5.2	-4.7	-4.7	-4.5	-4.5	-4.2	-4	-3.7	-3.7	-3.7	-3.7	-3.6	-3	-3.2	-3.1	-2.9	-2.8	-2.8	-2.6	-2.3
XZ009	申扎县	2020-01-10 10:00:00	-12.6	-10.8	-9.7	-8.9	-8	-7.3	-6.8	-6.5	-6.2	-5.9	-5.9	-5.5	-5.3	-4.8	-4.7	-4.5	-4.5	-4.2	-4	-3.7	-3.7	-3.7	-3.7	-3.6	-3	-3.2	-3.1	-2.9	-2.8	-2.8	-2.6	-2.3
XZ009	申扎县	2020-01-10 11:00:00	-10.7	-10.4	-9.8	-9.2	-8.2	-7.5	-7	-6.8	-6.4	-6	-6	-5.7	-5.4	-4.9	-4.7	-4.5	-4.5	-4.2	-4	-3.7	-3.8	-3.7	-3.7	-3.6	-3	-3.1	-3.1	-2.9	-2.8	-2.8	-2.6	-2.3
XZ009	申扎县	2020-01-10 12:00:00	-8.2	-9	-9	-8.8	-8.2	-7.6	-7.2	-7	-6.5	-6.1	-6.1	-5.8	-5.5	-4.9	-4.8	-4.5	-4.5	-4.2	-4	-3.8	-3.7	-3.7	-3.7	-3.6	-3	-3.2	-3.1	-2.9	-2.7	-2.8	-2.5	-2.3
XZ009	申扎县	2020-01-10 13:00:00	-5.5	-7.2	-7.7	-7.9	-7.7	-7.4	-7.1	-6.9	-6.6	-6.2	-6.2	-5.9	-5.6	-5	-4.9	-4.6	-4.6	-4.2	-4	-3.8	-3.8	-3.7	-3.7	-3.6	-3	-3.1	-3.1	-2.9	-2.7	-2.8	-2.5	-2.3
XZ009	申扎县	2020-01-10 14:00:00	-3.5	-5.5	-6.3	-6.8	-6.9	-6.9	-6.9	-6.8	-6.5	-6.2	-6.2	-6	-5.7	-5.1	-4.9	-4.7	-4.7	-4.3	-4	-3.8	-3.8	-3.7	-3.7	-3.6	-3	-3.2	-3.1	-2.9	-2.7	-2.8	-2.5	-2.3
XZ009	申扎县	2020-01-10 15:00:00	-1.8	-3.9	-5	-5.7	-6	-6.2	-6.4	-6.5	-6.4	-6.1	-6.1	-5.9	-5.7	-5.1	-5	-4.7	-4.7	-4.4	-4.1	-3.8	-3.8	-3.8	-3.7	-3.6	-3	-3.1	-3.1	-2.9	-2.7	-2.8	-2.6	-2.3
XZ009	申扎县	2020-01-10 16:00:00	-0.8	-2.8	-3.9	-4.7	-5.2	-5.5	-5.9	-6.1	-6.1	-5.9	-5.9	-5.8	-5.6	-5.1	-5	-4.7	-4.7	-4.4	-4.1	-3.8	-3.8	-3.8	-3.7	-3.6	-3	-3.2	-3	-2.9	-2.7	-2.8	-2.5	-2.3
XZ009	申扎县	2020-01-10 17:00:00	-0.2	-2	-3.1	-4	-4.4	-4.9	-5.4	-5.7	-5.7	-5.7	-5.7	-5.6	-5.5	-5	-5	-4.7	-4.7	-4.4	-4.1	-3.9	-3.9	-3.8	-3.8	-3.6	-3	-3.2	-3.1	-2.9	-2.7	-2.8	-2.5	-2.3
XZ009	申扎县	2020-01-10 18:00:00	-1	-2	-2.7	-3.4	-3.9	-4.4	-4.9	-5.3	-5.4	-5.4	-5.4	-5.4	-5.3	-5	-4.9	-4.7	-4.7	-4.4	-4.1	-3.9	-3.9	-3.8	-3.8	-3.6	-3	-3.2	-3.1	-2.9	-2.7	-2.7	-2.5	-2.3
XZ009	申扎县	2020-01-10 19:00:00	-2.6	-2.6	-2.9	-3.3	-3.6	-4	-4.5	-4.9	-5	-5.1	-5.1	-5.1	-5.1	-4.9	-4.9	-4.7	-4.7	-4.4	-4.1	-3.9	-3.9	-3.8	-3.8	-3.6	-3	-3.2	-3.1	-2.9	-2.7	-2.8	-2.5	-2.3
XZ009	申扎县	2020-01-10 20:00:00	-5.5	-4	-3.7	-3.7	-3.7	-4	-4.3	-4.7	-4.9	-4.9	-4.9	-4.9	-4.9	-4.7	-4.7	-4.6	-4.7	-4.3	-4.1	-3.9	-3.9	-3.9	-3.8	-3.6	-3.1	-3.2	-3.1	-2.9	-2.7	-2.8	-2.5	-2.3
XZ009	申扎县	2020-01-10 21:00:00	-7.9	-5.7	-4.9	-4.5	-4.2	-4.2	-4.3	-4.6	-4.7	-4.7	-4.7	-4.7	-4.7	-4.6	-4.7	-4.5	-4.6	-4.2	-4	-3.9	-3.9	-3.8	-3.8	-3.7	-3	-3.2	-3.1	-2.9	-2.7	-2.8	-2.5	-2.3
XZ009	申扎县	2020-01-10 22:00:00	-9.2	-7	-5.9	-5.4	-4.7	-4.5	-4.5	-4.7	-4.7	-4.7	-4.7	-4.7	-4.6	-4.5	-4.5	-4.4	-4.5	-4.2	-4	-3.8	-3.8	-3.8	-3.8	-3.6	-3	-3.2	-3.1	-2.9	-2.8	-2.8	-2.6	-2.3
XZ009	申扎县	2020-01-10 23:00:00	-10.4	-8	-6.9	-6.1	-5.4	-5	-4.9	-4.9	-4.8	-4.7	-4.7	-4.6	-4.6	-4.4	-4.5	-4.4	-4.5	-4.2	-4	-3.7	-3.8	-3.8	-3.7	-3.6	-3.1	-3.2	-3.1	-2.9	-2.7	-2.8	-2.5	-2.3
XZ009	申扎县	2020-01-11 00:00:00	-11.4	-9	-7.7	-6.9	-6	-5.5	-5.2	-5.1	-4.9	-4.7	-4.7	-4.7	-4.5	-4.4	-4.4	-4.3	-4.4	-4.1	-3.9	-3.7	-3.8	-3.7	-3.7	-3.6	-3	-3.2	-3.1	-2.9	-2.7	-2.8	-2.6	-2.3
XZ009	申扎县	2020-01-11 01:00:00	-12	-9.7	-8.4	-7.5	-6.6	-6	-5.5	-5.4	-5.2	-4.9	-4.9	-4.8	-4.6	-4.4	-4.4	-4.3	-4.4	-4	-3.9	-3.7	-3.7	-3.7	-3.7	-3.5	-3	-3.2	-3	-2.9	-2.7	-2.8	-2.5	-2.3
XZ009	申扎县	2020-01-11 02:00:00	-13.1	-10.5	-9.1	-8.1	-7.1	-6.4	-5.9	-5.7	-5.4	-5	-5	-4.9	-4.7	-4.4	-4.4	-4.2	-4.4	-4	-3.9	-3.6	-3.7	-3.7	-3.7	-3.5	-3	-3.1	-3.1	-2.9	-2.7	-2.8	-2.6	-2.3
XZ009	申扎县	2020-01-11 03:00:00	-13.7	-11.2	-9.7	-8.7	-7.6	-6.8	-6.3	-6	-5.7	-5.3	-5.3	-5	-4.8	-4.5	-4.4	-4.2	-4.3	-4	-3.9	-3.6	-3.7	-3.7	-3.7	-3.5	-3	-3.1	-3	-2.9	-2.7	-2.7	-2.5	-2.3
XZ009	申扎县	2020-01-11 04:00:00	-14.4	-11.9	-10.4	-9.3	-8.1	-7.2	-6.7	-6.3	-5.9	-5.5	-5.5	-5.2	-4.9	-4.5	-4.4	-4.3	-4.4	-4	-3.9	-3.6	-3.7	-3.6	-3.7	-3.5	-3	-3.1	-3	-2.9	-2.8	-2.8	-2.5	-2.3
XZ009	申扎县	2020-01-11 05:00:00	-15	-12.4	-10.9	-9.8	-8.5	-7.7	-7	-6.7	-6.2	-5.7	-5.7	-5.4	-5.1	-4.6	-4.5	-4.4	-4.4	-4	-3.9	-3.6	-3.6	-3.7	-3.7	-3.5	-3	-3.1	-3	-2.9	-2.7	-2.7	-2.5	-2.3
XZ009	申扎县	2020-01-11 06:00:00	-15.4	-12.9	-11.4	-10.3	-9	-8	-7.4	-7	-6.5	-6	-6	-5.6	-5.3	-4.7	-4.6	-4.4	-4.4	-4	-3.9	-3.6	-3.7	-3.7	-3.6	-3.5	-3	-3.1	-3	-2.9	-2.7	-2.7	-2.5	-2.3
XZ009	申扎县	2020-01-11 07:00:00	-16.2	-13.5	-11.9	-10.8	-9.5	-8.4	-7.7	-7.3	-6.7	-6.2	-6.2	-5.9	-5.4	-4.8	-4.7	-4.4	-4.4	-4	-3.9	-3.6	-3.7	-3.7	-3.6	-3.5	-3	-3.1	-3	-2.9	-2.7	-2.7	-2.5	-2.3
XZ009	申扎县	2020-01-11 08:00:00	-16.8	-14	-12.4	-11.2	-9.9	-8.8	-8	-7.5	-7	-6.4	-6.4	-6	-5.7	-4.9	-4.8	-4.5	-4.5	-4.1	-3.9	-3.6	-3.7	-3.7	-3.6	-3.5	-3	-3	-3	-2.9	-2.7	-2.7	-2.5	-2.3
XZ009	申扎县	2020-01-11 09:00:00	-17.2	-14.5	-12.9	-11.7	-10.3	-9.2	-8.4	-7.9	-7.3	-6.7	-6.7	-6.2	-5.8	-5	-4.9	-4.6	-4.5	-4.2	-3.9	-3.7	-3.7	-3.7	-3.6	-3.5	-3	-3.1	-3	-2.9	-2.7	-2.7	-2.5	-2.3
XZ009	申扎县	2020-01-11 10:00:00	-17	-14.8	-13.3	-12	-10.7	-9.5	-8.7	-8.2	-7.5	-6.9	-6.9	-6.5	-6	-5.2	-5	-4.7	-4.7	-4.2	-4	-3.7	-3.7	-3.7	-3.7	-3.5	-3	-3.1	-3	-2.9	-2.7	-2.7	-2.5	-2.3
XZ009	申扎县	2020-01-11 11:00:00	-13.5	-13.5	-13	-12.1	-10.9	-9.9	-9	-8.5	-7.9	-7.2	-7.2	-6.7	-6.2	-5.4	-5.1	-4.8	-4.7	-4.3	-4	-3.8	-3.7	-3.7	-3.7	-3.5	-3	-3.1	-3	-2.9	-2.7	-2.7	-2.5	-2.2
XZ009	申扎县	2020-01-11 12:00:00	-9.3	-11.1	-11.5	-11.3	-10.5	-9.8	-9.1	-8.6	-8	-7.4	-7.4	-6.9	-6.4	-5.5	-5.2	-4.9	-4.9	-4.4	-4.1	-3.8	-3.9	-3.7	-3.7	-3.5	-3	-3	-3	-2.9	-2.7	-2.7	-2.5	-2.2
XZ009	申扎县	2020-01-11 13:00:00	-5.2	-8.3	-9.4	-9.9	-9.7	-9.3	-8.9	-8.6	-8.1	-7.5	-7.5	-7	-6.5	-5.6	-5.4	-5	-4.9	-4.5	-4.2	-3.9	-3.9	-3.8	-3.7	-3.5	-3	-3.1	-3	-2.9	-2.7	-2.7	-2.5	-2.2
XZ009	申扎县	2020-01-11 14:00:00	-2.2	-5.7	-7.3	-8.2	-8.5	-8.5	-8.5	-8.4	-8	-7.5	-7.5	-7.1	-6.6	-5.7	-5.5	-5.1	-5	-4.5	-4.2	-4	-3.9	-3.9	-3.8	-3.6	-3	-3.1	-3	-2.9	-2.7	-2.7	-2.5	-2.3
XZ009	申扎县	2020-01-11 15:00:00	-1.3	-4.1	-5.6	-6.7	-7.2	-7.5	-7.8	-7.9	-7.7	-7.3	-7.3	-7	-6.6	-5.8	-5.5	-5.2	-5.1	-4.7	-4.3	-4	-4	-3.9	-3.9	-3.6	-3	-3.1	-3	-2.9	-2.7	-2.7	-2.5	-2.3
XZ009	申扎县	2020-01-11 16:00:00	-0.7	-3.2	-4.5	-5.5	-6.1	-6.7	-7	-7.3	-7.2	-7	-7	-6.8	-6.5	-5.9	-5.6	-5.2	-5.2	-4.7	-4.4	-4.1	-4	-4	-3.9	-3.7	-3.1	-3.2	-3.1	-2.9	-2.7	-2.8	-2.5	-2.3
XZ009	申扎县	2020-01-11 17:00:00	-0.7	-2.6	-3.8	-4.7	-5.4	-5.9	-6.4	-6.8	-6.8	-6.7	-6.7	-6.5	-6.4	-5.7	-5.6	-5.3	-5.2	-4.7	-4.5	-4.1	-4	-4	-3.9	-3.7	-3.1	-3.2	-3.1	-2.9	-2.7	-2.8	-2.5	-2.3
XZ009	申扎县	2020-01-11 18:00:00	-1.4	-2.6	-3.5	-4.2	-4.8	-5.4	-5.9	-6.3	-6.4	-6.4	-6.4	-6.3	-6.1	-5.7	-5.5	-5.3	-5.2	-4.8	-4.5	-4.2	-4.1	-4	-3.9	-3.7	-3.2	-3.2	-3.2	-2.9	-2.8	-2.8	-2.6	-2.3
XZ009	申扎县	2020-01-11 19:00:00	-2.7	-3.2	-3.6	-4.1	-4.5	-5	-5.4	-5.9	-6	-6	-6	-6	-5.9	-5.5	-5.5	-5.2	-5.2	-4.7	-4.5	-4.2	-4.2	-4	-4	-3.8	-3.2	-3.2	-3.2	-3	-2.8	-2.8	-2.6	-2.4
XZ009	申扎县	2020-01-11 20:00:00	-4.9	-4.3	-4.2	-4.4	-4.5	-4.8	-5.2	-5.5	-5.7	-5.7	-5.7	-5.7	-5.7	-5.4	-5.4	-5.1	-5.1	-4.7	-4.5	-4.2	-4.2	-4.1	-4	-3.8	-3.2	-3.3	-3.2	-3	-2.9	-2.9	-2.6	-2.3
XZ009	申扎县	2020-01-11 21:00:00	-6.7	-5.5	-5	-4.9	-4.8	-4.9	-5.1	-5.4	-5.5	-5.5	-5.5	-5.5	-5.5	-5.3	-5.2	-5	-5	-4.7	-4.5	-4.2	-4.2	-4	-4	-3.8	-3.2	-3.3	-3.2	-3	-2.9	-2.9	-2.6	-2.4
XZ009	申扎县	2020-01-11 22:00:00	-8.4	-6.7	-6	-5.6	-5.2	-5.2	-5.2	-5.4	-5.4	-5.4	-5.4	-5.4	-5.4	-5.2	-5.1	-5	-5	-4.7	-4.4	-4.2	-4.1	-4	-4	-3.9	-3.2	-3.3	-3.2	-3	-2.9	-2.9	-2.7	-2.4
XZ009	申扎县	2020-01-11 23:00:00	-9.7	-7.8	-6.9	-6.3	-5.7	-5.4	-5.4	-5.5	-5.4	-5.4	-5.4	-5.3	-5.2	-5	-5	-4.9	-4.9	-4.6	-4.4	-4.1	-4.1	-4	-4	-3.9	-3.2	-3.4	-3.2	-3	-2.9	-2.9	-2.7	-2.4
XZ009	申扎县	2020-01-12 00:00:00	-10.6	-8.6	-7.6	-7	-6.3	-5.9	-5.7	-5.7	-5.5	-5.4	-5.4	-5.3	-5.2	-5	-5	-4.8	-4.9	-4.5	-4.4	-4.1	-4.1	-4	-4	-3.9	-3.2	-3.4	-3.2	-3	-2.9	-2.9	-2.7	-2.4
XZ009	申扎县	2020-01-12 01:00:00	-11.3	-9.3	-8.2	-7.5	-6.7	-6.3	-6	-5.9	-5.7	-5.5	-5.5	-5.4	-5.2	-4.9	-4.9	-4.7	-4.8	-4.5	-4.3	-4	-4	-4	-4	-3.8	-3.3	-3.3	-3.3	-3	-2.9	-2.9	-2.7	-2.4
XZ009	申扎县	2020-01-12 02:00:00	-11.9	-9.9	-8.9	-8.1	-7.2	-6.7	-6.3	-6.2	-5.9	-5.6	-5.6	-5.4	-5.2	-4.9	-4.9	-4.7	-4.8	-4.4	-4.3	-4	-4	-4	-4	-3.8	-3.2	-3.4	-3.2	-3	-2.9	-2.9	-2.7	-2.4
XZ009	申扎县	2020-01-12 03:00:00	-12.3	-10.4	-9.3	-8.5	-7.7	-7	-6.6	-6.4	-6.1	-5.7	-5.7	-5.5	-5.3	-5	-4.9	-4.7	-4.7	-4.4	-4.2	-4	-4	-4	-3.9	-3.8	-3.2	-3.3	-3.2	-3	-2.9	-2.9	-2.7	-2.4
XZ009	申扎县	2020-01-12 04:00:00	-12.9	-10.9	-9.8	-9	-8	-7.4	-6.9	-6.7	-6.3	-5.9	-5.9	-5.7	-5.4	-5	-4.9	-4.7	-4.7	-4.4	-4.2	-4	-4	-4	-3.9	-3.8	-3.2	-3.3	-3.2	-3	-2.9	-2.9	-2.7	-2.4
XZ009	申扎县	2020-01-12 05:00:00	-13.4	-11.4	-10.2	-9.4	-8.4	-7.7	-7.2	-6.9	-6.5	-6.1	-6.1	-5.8	-5.5	-5	-5	-4.7	-4.8	-4.4	-4.2	-4	-4	-3.9	-4	-3.7	-3.2	-3.3	-3.2	-3	-2.9	-2.9	-2.7	-2.4
XZ009	申扎县	2020-01-12 06:00:00	-14.1	-11.9	-10.7	-9.8	-8.8	-8	-7.5	-7.1	-6.7	-6.3	-6.3	-6	-5.7	-5.1	-5	-4.8	-4.8	-4.4	-4.2	-4	-4	-3.9	-3.9	-3.7	-3.2	-3.3	-3.2	-3	-2.9	-2.9	-2.7	-2.4
XZ009	申扎县	2020-01-12 07:00:00	-14.6	-12.4	-11.2	-10.2	-9.2	-8.3	-7.7	-7.4	-6.9	-6.4	-6.4	-6.1	-5.7	-5.2	-5	-4.8	-4.8	-4.4	-4.2	-4	-4	-3.9	-3.9	-3.7	-3.2	-3.3	-3.2	-3	-2.9	-2.9	-2.7	-2.4
XZ009	申扎县	2020-01-12 08:00:00	-15	-12.9	-11.6	-10.7	-9.5	-8.7	-8	-7.6	-7.2	-6.7	-6.7	-6.2	-5.9	-5.3	-5.1	-4.9	-4.9	-4.5	-4.2	-4	-4	-3.9	-3.9	-3.7	-3.2	-3.3	-3.2	-3	-2.9	-2.9	-2.7	-2.4
XZ009	申扎县	2020-01-12 09:00:00	-15.5	-13.3	-12	-11	-9.8	-8.9	-8.3	-7.9	-7.4	-6.9	-6.9	-6.5	-6	-5.4	-5.2	-4.9	-4.9	-4.5	-4.2	-4	-4	-4	-3.9	-3.7	-3.2	-3.3	-3.2	-3	-2.9	-2.9	-2.7	-2.4
XZ009	申扎县	2020-01-12 10:00:00	-15.1	-13.5	-12.3	-11.4	-10.2	-9.2	-8.5	-8.1	-7.6	-7	-7	-6.6	-6.2	-5.5	-5.3	-5	-4.9	-4.5	-4.3	-4	-4	-4	-3.9	-3.7	-3.2	-3.3	-3.2	-3	-2.9	-2.9	-2.7	-2.4
XZ009	申扎县	2020-01-12 11:00:00	-11.9	-12.2	-11.9	-11.3	-10.3	-9.4	-8.7	-8.4	-7.8	-7.2	-7.2	-6.8	-6.4	-5.5	-5.4	-5	-5	-4.6	-4.4	-4	-4	-4	-3.9	-3.8	-3.2	-3.3	-3.2	-3	-2.9	-2.9	-2.7	-2.4
XZ009	申扎县	2020-01-12 12:00:00	-7.7	-9.9	-10.5	-10.5	-9.9	-9.4	-8.8	-8.5	-7.9	-7.4	-7.4	-6.9	-6.5	-5.7	-5.4	-5.2	-5.1	-4.7	-4.4	-4.1	-4.1	-4	-4	-3.8	-3.2	-3.3	-3.2	-3	-2.9	-2.9	-2.7	-2.4
XZ009	申扎县	2020-01-12 13:00:00	-3.4	-6.9	-8.4	-9	-9	-8.8	-8.6	-8.4	-8	-7.5	-7.5	-7	-6.6	-5.8	-5.5	-5.2	-5.2	-4.7	-4.5	-4.2	-4.1	-4	-4	-3.8	-3.2	-3.4	-3.2	-3	-2.9	-2.9	-2.7	-2.4
XZ009	申扎县	2020-01-12 14:00:00	0.1	-4.1	-6.1	-7.2	-7.7	-7.9	-8	-8	-7.8	-7.4	-7.4	-7	-6.7	-5.9	-5.7	-5.4	-5.2	-4.8	-4.5	-4.2	-4.2	-4	-4	-3.9	-3.2	-3.3	-3.2	-3	-2.9	-2.9	-2.7	-2.4
XZ009	申扎县	2020-01-12 15:00:00	1.9	-2	-4.2	-5.5	-6.3	-6.9	-7.3	-7.5	-7.4	-7.2	-7.2	-6.9	-6.6	-5.9	-5.7	-5.4	-5.3	-4.9	-4.5	-4.2	-4.2	-4.1	-4	-3.9	-3.3	-3.4	-3.3	-3	-2.9	-2.9	-2.7	-2.4
XZ009	申扎县	2020-01-12 16:00:00	1.7	-1.2	-3	-4.3	-5.2	-5.9	-6.5	-6.9	-7	-6.9	-6.9	-6.7	-6.5	-5.9	-5.7	-5.4	-5.3	-4.9	-4.6	-4.3	-4.2	-4.2	-4.1	-3.9	-3.3	-3.4	-3.3	-3.1	-2.9	-2.9	-2.7	-2.4
XZ009	申扎县	2020-01-12 17:00:00	0.6	-1.2	-2.5	-3.5	-4.4	-5.1	-5.8	-6.3	-6.4	-6.4	-6.4	-6.4	-6.2	-5.8	-5.7	-5.4	-5.4	-4.9	-4.6	-4.4	-4.3	-4.2	-4.1	-3.9	-3.3	-3.4	-3.3	-3.1	-2.9	-2.9	-2.7	-2.4
XZ009	申扎县	2020-01-12 18:00:00	-0.2	-1.5	-2.5	-3.3	-3.9	-4.6	-5.2	-5.7	-6	-6	-6	-6	-6	-5.7	-5.6	-5.4	-5.4	-4.9	-4.7	-4.4	-4.3	-4.2	-4.2	-3.9	-3.4	-3.4	-3.3	-3.1	-2.9	-2.9	-2.7	-2.4
XZ009	申扎县	2020-01-12 19:00:00	-0.7	-1.8	-2.5	-3.2	-3.7	-4.3	-4.9	-5.4	-5.5	-5.7	-5.7	-5.8	-5.7	-5.5	-5.5	-5.3	-5.3	-4.9	-4.7	-4.4	-4.3	-4.2	-4.2	-3.9	-3.4	-3.4	-3.4	-3.1	-2.9	-2.9	-2.7	-2.4
XZ009	申扎县	2020-01-12 20:00:00	-2.4	-2.5	-2.9	-3.3	-3.6	-4.1	-4.6	-5	-5.3	-5.4	-5.4	-5.5	-5.5	-5.4	-5.4	-5.2	-5.2	-4.9	-4.6	-4.4	-4.3	-4.2	-4.2	-4	-3.4	-3.5	-3.4	-3.1	-2.9	-3	-2.7	-2.4
XZ009	申扎县	2020-01-12 21:00:00	-4.1	-3.6	-3.5	-3.7	-3.8	-4.1	-4.5	-4.9	-5	-5.2	-5.2	-5.2	-5.3	-5.2	-5.2	-5	-5.1	-4.8	-4.5	-4.3	-4.3	-4.2	-4.2	-4	-3.4	-3.5	-3.4	-3.1	-3	-3	-2.8	-2.5
XZ009	申扎县	2020-01-12 22:00:00	-5.6	-4.7	-4.3	-4.2	-4.1	-4.2	-4.5	-4.8	-4.9	-5	-5	-5	-5.1	-5	-5.1	-4.9	-5	-4.7	-4.5	-4.2	-4.2	-4.2	-4.2	-4	-3.4	-3.5	-3.4	-3.2	-3	-3	-2.8	-2.5
XZ009	申扎县	2020-01-12 23:00:00	-6.9	-5.7	-5.1	-4.8	-4.5	-4.5	-4.6	-4.8	-4.9	-4.9	-4.9	-5	-5	-4.9	-5	-4.9	-4.9	-4.6	-4.5	-4.2	-4.2	-4.2	-4.1	-4	-3.4	-3.4	-3.4	-3.2	-3	-3	-2.8	-2.5
XZ009	申扎县	2020-01-13 00:00:00	-7.8	-6.5	-5.8	-5.4	-4.9	-4.8	-4.8	-4.9	-4.9	-4.9	-4.9	-4.9	-4.9	-4.8	-4.9	-4.7	-4.9	-4.5	-4.4	-4.2	-4.2	-4.2	-4.1	-3.9	-3.4	-3.4	-3.4	-3.2	-3	-3	-2.8	-2.5
XZ009	申扎县	2020-01-13 01:00:00	-8.5	-7.1	-6.4	-5.9	-5.4	-5.1	-5	-5.1	-5	-4.9	-4.9	-4.9	-4.9	-4.7	-4.8	-4.7	-4.8	-4.5	-4.3	-4.1	-4.1	-4.1	-4.1	-3.9	-3.4	-3.4	-3.4	-3.2	-3	-3	-2.8	-2.5
XZ009	申扎县	2020-01-13 02:00:00	-8.9	-7.5	-6.9	-6.4	-5.7	-5.4	-5.2	-5.2	-5.2	-5	-5	-4.9	-4.9	-4.7	-4.7	-4.6	-4.7	-4.4	-4.2	-4	-4	-4	-4	-3.9	-3.4	-3.4	-3.4	-3.2	-3	-3	-2.8	-2.5
XZ009	申扎县	2020-01-13 03:00:00	-9.4	-8	-7.3	-6.7	-6.1	-5.7	-5.5	-5.4	-5.3	-5.1	-5.1	-5	-4.9	-4.7	-4.7	-4.5	-4.7	-4.4	-4.2	-4	-4	-4	-4	-3.9	-3.4	-3.4	-3.4	-3.2	-3	-3	-2.8	-2.5
XZ009	申扎县	2020-01-13 04:00:00	-10	-8.5	-7.7	-7.1	-6.4	-6	-5.7	-5.7	-5.4	-5.2	-5.2	-5	-4.9	-4.7	-4.7	-4.5	-4.6	-4.3	-4.2	-4	-4	-4	-4	-3.9	-3.3	-3.4	-3.4	-3.2	-3	-3	-2.8	-2.5
XZ009	申扎县	2020-01-13 05:00:00	-10.7	-9	-8.2	-7.5	-6.8	-6.3	-6	-5.9	-5.6	-5.3	-5.3	-5.2	-5	-4.7	-4.7	-4.5	-4.6	-4.3	-4.1	-3.9	-4	-4	-3.9	-3.8	-3.3	-3.4	-3.3	-3.1	-3	-3	-2.8	-2.5
XZ009	申扎县	2020-01-13 06:00:00	-11.2	-9.5	-8.5	-7.9	-7.1	-6.6	-6.2	-6	-5.8	-5.5	-5.5	-5.3	-5	-4.7	-4.7	-4.5	-4.6	-4.3	-4.1	-3.9	-3.9	-3.9	-3.9	-3.8	-3.3	-3.4	-3.3	-3.1	-3	-3	-2.8	-2.5
XZ009	申扎县	2020-01-13 07:00:00	-11.5	-9.9	-8.9	-8.3	-7.5	-6.9	-6.5	-6.3	-6	-5.6	-5.6	-5.4	-5.2	-4.7	-4.7	-4.5	-4.6	-4.3	-4.1	-3.9	-3.9	-3.9	-3.9	-3.8	-3.2	-3.4	-3.3	-3.1	-3	-3	-2.7	-2.5
XZ009	申扎县	2020-01-13 08:00:00	-12	-10.2	-9.3	-8.6	-7.8	-7.2	-6.7	-6.5	-6.1	-5.8	-5.8	-5.5	-5.2	-4.8	-4.7	-4.5	-4.6	-4.3	-4.1	-3.9	-3.9	-3.9	-3.9	-3.7	-3.2	-3.3	-3.3	-3.1	-3	-3	-2.7	-2.5
XZ009	申扎县	2020-01-13 09:00:00	-12.4	-10.7	-9.7	-8.9	-8.1	-7.4	-6.9	-6.7	-6.4	-5.9	-5.9	-5.6	-5.4	-4.9	-4.8	-4.6	-4.6	-4.3	-4.1	-3.9	-3.9	-3.9	-3.9	-3.7	-3.2	-3.3	-3.2	-3.1	-2.9	-3	-2.7	-2.5
XZ009	申扎县	2020-01-13 10:00:00	-12.2	-10.9	-10	-9.3	-8.4	-7.7	-7.2	-6.9	-6.5	-6.1	-6.1	-5.8	-5.5	-5	-4.9	-4.7	-4.7	-4.3	-4.1	-3.9	-3.9	-3.9	-3.9	-3.7	-3.2	-3.3	-3.2	-3.1	-3	-3	-2.7	-2.5
XZ009	申扎县	2020-01-13 11:00:00	-8.9	-9.7	-9.5	-9.2	-8.5	-7.9	-7.4	-7.1	-6.7	-6.2	-6.2	-5.9	-5.6	-5	-4.9	-4.7	-4.7	-4.3	-4.1	-3.9	-3.9	-3.9	-3.9	-3.7	-3.2	-3.3	-3.2	-3.1	-2.9	-3	-2.7	-2.5
XZ009	申扎县	2020-01-13 12:00:00	-4.7	-7.4	-8.2	-8.4	-8	-7.7	-7.4	-7.2	-6.9	-6.4	-6.4	-6	-5.7	-5.2	-5	-4.7	-4.7	-4.4	-4.2	-3.9	-3.9	-3.9	-3.9	-3.7	-3.2	-3.3	-3.2	-3	-2.9	-3	-2.7	-2.5
XZ009	申扎县	2020-01-13 13:00:00	-0.9	-4.7	-6.3	-7	-7.2	-7.2	-7.1	-7.1	-6.8	-6.4	-6.4	-6.1	-5.8	-5.2	-5	-4.8	-4.8	-4.4	-4.2	-3.9	-3.9	-3.9	-3.9	-3.7	-3.2	-3.3	-3.2	-3	-2.9	-2.9	-2.7	-2.5
XZ009	申扎县	2020-01-13 14:00:00	2.5	-2.1	-4.2	-5.4	-5.9	-6.4	-6.6	-6.7	-6.6	-6.3	-6.3	-6.1	-5.9	-5.3	-5.1	-4.9	-4.9	-4.4	-4.2	-3.9	-3.9	-3.9	-3.9	-3.7	-3.2	-3.3	-3.2	-3	-2.9	-2.9	-2.7	-2.5
XZ009	申扎县	2020-01-13 15:00:00	5.3	0	-2.3	-3.8	-4.7	-5.4	-5.9	-6.2	-6.2	-6.1	-6.1	-6	-5.7	-5.2	-5.1	-4.9	-4.9	-4.5	-4.2	-4	-4	-3.9	-3.9	-3.7	-3.2	-3.3	-3.2	-3	-2.9	-2.9	-2.7	-2.5
XZ009	申扎县	2020-01-13 16:00:00	4.8	0.8	-1.2	-2.6	-3.6	-4.4	-5.1	-5.6	-5.8	-5.7	-5.7	-5.7	-5.6	-5.2	-5.1	-4.9	-4.9	-4.5	-4.3	-4	-4	-3.9	-3.9	-3.7	-3.2	-3.3	-3.2	-3	-2.9	-2.9	-2.7	-2.5
XZ009	申扎县	2020-01-13 17:00:00	2.9	0.5	-0.8	-2	-2.9	-3.7	-4.5	-5	-5.3	-5.4	-5.4	-5.4	-5.4	-5.1	-5	-4.9	-4.9	-4.5	-4.3	-4	-4	-4	-3.9	-3.8	-3.2	-3.4	-3.2	-3	-2.9	-3	-2.7	-2.5
XZ009	申扎县	2020-01-13 18:00:00	2.1	0.3	-0.7	-1.7	-2.5	-3.3	-3.9	-4.5	-4.8	-5	-5	-5.1	-5.1	-5	-5	-4.8	-4.9	-4.5	-4.3	-4	-4	-4	-3.9	-3.8	-3.2	-3.3	-3.2	-3	-2.9	-2.9	-2.7	-2.5
XZ009	申扎县	2020-01-13 19:00:00	1	0	-0.8	-1.6	-2.2	-2.9	-3.6	-4.2	-4.5	-4.7	-4.7	-4.8	-4.9	-4.9	-4.9	-4.7	-4.8	-4.5	-4.2	-4	-4	-4	-4	-3.8	-3.2	-3.3	-3.3	-3	-2.9	-2.9	-2.7	-2.5
XZ009	申扎县	2020-01-13 20:00:00	-0.9	-0.9	-1.2	-1.7	-2.2	-2.7	-3.4	-3.9	-4.2	-4.4	-4.4	-4.5	-4.6	-4.7	-4.7	-4.6	-4.7	-4.4	-4.2	-4	-4	-4	-3.9	-3.8	-3.2	-3.4	-3.3	-3	-2.9	-2.9	-2.7	-2.5
XZ009	申扎县	2020-01-13 21:00:00	-2.5	-1.9	-1.9	-2	-2.3	-2.7	-3.2	-3.7	-3.9	-4.2	-4.2	-4.4	-4.5	-4.5	-4.6	-4.5	-4.6	-4.3	-4.2	-3.9	-3.9	-3.9	-3.9	-3.8	-3.2	-3.4	-3.3	-3.1	-2.9	-2.9	-2.7	-2.5
XZ009	申扎县	2020-01-13 22:00:00	-4.4	-3.2	-2.7	-2.6	-2.6	-2.9	-3.2	-3.6	-3.9	-4	-4	-4.1	-4.2	-4.4	-4.4	-4.4	-4.5	-4.2	-4.1	-3.9	-3.9	-3.9	-3.9	-3.7	-3.2	-3.3	-3.2	-3	-2.9	-3	-2.7	-2.5
XZ009	申扎县	2020-01-13 23:00:00	-5.9	-4.3	-3.6	-3.4	-3.1	-3.1	-3.4	-3.7	-3.8	-3.9	-3.9	-4	-4.1	-4.2	-4.4	-4.3	-4.4	-4.2	-4	-3.8	-3.9	-3.9	-3.9	-3.7	-3.2	-3.4	-3.2	-3	-2.9	-3	-2.7	-2.5
XZ009	申扎县	2020-01-14 00:00:00	-7	-5.3	-4.5	-4	-3.6	-3.5	-3.5	-3.7	-3.8	-3.9	-3.9	-3.9	-4	-4.1	-4.2	-4.2	-4.3	-4	-3.9	-3.7	-3.8	-3.8	-3.8	-3.7	-3.2	-3.3	-3.2	-3	-2.9	-2.9	-2.7	-2.5
XZ009	申扎县	2020-01-14 01:00:00	-7.8	-6.1	-5.2	-4.7	-4.1	-3.9	-3.9	-4	-3.9	-3.9	-3.9	-3.9	-4	-4	-4.1	-4.1	-4.2	-4	-3.9	-3.7	-3.8	-3.8	-3.8	-3.7	-3.1	-3.3	-3.2	-3	-2.9	-2.9	-2.7	-2.5
XZ009	申扎县	2020-01-14 02:00:00	-8.5	-6.8	-5.9	-5.2	-4.6	-4.3	-4.1	-4.1	-4.1	-4	-4	-4	-4	-4	-4.1	-4	-4.2	-3.9	-3.8	-3.6	-3.7	-3.7	-3.7	-3.6	-3.1	-3.3	-3.2	-3	-2.9	-2.9	-2.7	-2.5
XZ009	申扎县	2020-01-14 03:00:00	-9	-7.3	-6.4	-5.8	-5.1	-4.7	-4.4	-4.4	-4.3	-4.1	-4.1	-4	-4	-4	-4	-3.9	-4.1	-3.9	-3.7	-3.5	-3.7	-3.7	-3.7	-3.6	-3.1	-3.2	-3.2	-3	-2.9	-2.9	-2.7	-2.5
XZ009	申扎县	2020-01-14 04:00:00	-9.6	-7.8	-6.9	-6.2	-5.5	-5	-4.7	-4.7	-4.5	-4.3	-4.3	-4.2	-4.1	-4	-4	-3.9	-4	-3.8	-3.7	-3.5	-3.6	-3.7	-3.7	-3.5	-3	-3.2	-3.2	-3	-2.9	-2.9	-2.7	-2.4
XZ009	申扎县	2020-01-14 05:00:00	-10	-8.2	-7.3	-6.6	-5.9	-5.4	-5	-4.9	-4.7	-4.4	-4.4	-4.3	-4.2	-4	-4	-3.9	-4	-3.8	-3.7	-3.5	-3.6	-3.6	-3.6	-3.5	-3	-3.2	-3.2	-3	-2.9	-2.9	-2.7	-2.4
XZ009	申扎县	2020-01-14 06:00:00	-10.2	-8.5	-7.7	-7	-6.2	-5.7	-5.3	-5.2	-4.9	-4.6	-4.6	-4.5	-4.3	-4	-4	-3.9	-4	-3.8	-3.7	-3.4	-3.5	-3.5	-3.6	-3.5	-3	-3.2	-3.1	-3	-2.9	-2.9	-2.7	-2.4
XZ009	申扎县	2020-01-14 07:00:00	-10.9	-9	-8	-7.4	-6.5	-6	-5.6	-5.4	-5.1	-4.8	-4.8	-4.6	-4.4	-4.1	-4	-3.9	-4	-3.8	-3.6	-3.4	-3.5	-3.5	-3.5	-3.5	-3	-3.2	-3.1	-2.9	-2.8	-2.9	-2.7	-2.4
XZ009	申扎县	2020-01-14 08:00:00	-11.2	-9.4	-8.4	-7.7	-6.9	-6.3	-5.9	-5.6	-5.3	-5	-5	-4.7	-4.5	-4.2	-4.1	-4	-4	-3.8	-3.6	-3.4	-3.5	-3.5	-3.5	-3.4	-2.9	-3.1	-3.1	-2.9	-2.8	-2.9	-2.7	-2.4
XZ009	申扎县	2020-01-14 09:00:00	-11.4	-9.7	-8.8	-8	-7.2	-6.6	-6.2	-5.9	-5.5	-5.1	-5.1	-4.9	-4.6	-4.2	-4.2	-4	-4.1	-3.8	-3.6	-3.4	-3.5	-3.5	-3.5	-3.4	-2.9	-3.1	-3	-2.9	-2.8	-2.9	-2.6	-2.4
XZ009	申扎县	2020-01-14 10:00:00	-11.1	-9.9	-9	-8.4	-7.5	-6.9	-6.4	-6.1	-5.7	-5.3	-5.3	-5	-4.7	-4.3	-4.2	-4	-4.1	-3.8	-3.6	-3.4	-3.5	-3.5	-3.5	-3.4	-2.9	-3.1	-3	-2.9	-2.8	-2.8	-2.6	-2.4
XZ009	申扎县	2020-01-14 11:00:00	-8.1	-8.8	-8.7	-8.3	-7.6	-7	-6.6	-6.3	-5.9	-5.5	-5.5	-5.2	-4.9	-4.4	-4.3	-4.1	-4.2	-3.9	-3.7	-3.4	-3.5	-3.5	-3.5	-3.4	-2.9	-3	-3	-2.9	-2.8	-2.8	-2.6	-2.4
XZ009	申扎县	2020-01-14 12:00:00	-5.1	-6.9	-7.5	-7.6	-7.2	-6.9	-6.6	-6.4	-6	-5.6	-5.6	-5.4	-5	-4.5	-4.4	-4.2	-4.2	-3.9	-3.7	-3.5	-3.5	-3.5	-3.5	-3.4	-2.9	-3	-3	-2.9	-2.7	-2.8	-2.6	-2.4
XZ009	申扎县	2020-01-14 13:00:00	-2.5	-5.1	-6.1	-6.5	-6.5	-6.5	-6.4	-6.4	-6	-5.7	-5.7	-5.5	-5.1	-4.6	-4.5	-4.2	-4.2	-3.9	-3.7	-3.5	-3.5	-3.5	-3.5	-3.4	-2.9	-3	-3	-2.9	-2.7	-2.8	-2.6	-2.4
XZ009	申扎县	2020-01-14 14:00:00	-0.3	-3.3	-4.7	-5.4	-5.7	-5.9	-6	-6.1	-5.9	-5.7	-5.7	-5.4	-5.2	-4.7	-4.5	-4.3	-4.3	-3.9	-3.7	-3.5	-3.5	-3.5	-3.5	-3.4	-2.9	-3	-3	-2.9	-2.7	-2.7	-2.6	-2.4
XZ009	申扎县	2020-01-14 15:00:00	0.9	-1.9	-3.4	-4.3	-4.7	-5.2	-5.5	-5.7	-5.7	-5.5	-5.5	-5.3	-5.1	-4.7	-4.5	-4.4	-4.4	-4	-3.8	-3.5	-3.5	-3.5	-3.5	-3.4	-2.9	-3	-3	-2.9	-2.7	-2.7	-2.6	-2.4
XZ009	申扎县	2020-01-14 16:00:00	1.6	-1	-2.4	-3.4	-3.9	-4.5	-4.9	-5.2	-5.3	-5.2	-5.2	-5.2	-5	-4.6	-4.6	-4.4	-4.4	-4	-3.8	-3.5	-3.6	-3.5	-3.5	-3.4	-2.9	-3	-3	-2.9	-2.7	-2.8	-2.6	-2.3
XZ009	申扎县	2020-01-14 17:00:00	1.8	-0.4	-1.8	-2.7	-3.3	-3.9	-4.4	-4.8	-5	-4.9	-4.9	-5	-4.9	-4.5	-4.5	-4.4	-4.4	-4	-3.8	-3.6	-3.6	-3.6	-3.5	-3.4	-2.9	-3	-3	-2.9	-2.7	-2.7	-2.5	-2.3
XZ009	申扎县	2020-01-14 18:00:00	1.4	-0.3	-1.4	-2.3	-2.8	-3.4	-3.9	-4.4	-4.6	-4.7	-4.7	-4.7	-4.7	-4.5	-4.5	-4.3	-4.4	-4	-3.8	-3.6	-3.6	-3.6	-3.6	-3.5	-2.9	-3	-3	-2.9	-2.7	-2.8	-2.5	-2.3
XZ009	申扎县	2020-01-14 19:00:00	0.1	-0.7	-1.4	-2	-2.5	-3	-3.6	-4.1	-4.3	-4.4	-4.4	-4.5	-4.5	-4.4	-4.4	-4.2	-4.4	-4	-3.8	-3.5	-3.6	-3.6	-3.6	-3.4	-2.9	-3	-3	-2.9	-2.7	-2.7	-2.5	-2.3
XZ009	申扎县	2020-01-14 20:00:00	-1.5	-1.5	-1.8	-2.2	-2.4	-2.9	-3.4	-3.8	-4	-4.2	-4.2	-4.2	-4.3	-4.2	-4.3	-4.2	-4.3	-4	-3.8	-3.5	-3.6	-3.6	-3.6	-3.5	-2.9	-3	-3	-2.9	-2.7	-2.8	-2.5	-2.4
XZ009	申扎县	2020-01-14 21:00:00	-3.4	-2.6	-2.4	-2.5	-2.6	-2.9	-3.2	-3.6	-3.9	-3.9	-3.9	-4	-4.1	-4.1	-4.2	-4.1	-4.2	-3.9	-3.7	-3.5	-3.6	-3.6	-3.5	-3.5	-2.9	-3	-3	-2.9	-2.7	-2.8	-2.5	-2.3
XZ009	申扎县	2020-01-14 22:00:00	-5.1	-3.8	-3.3	-3.1	-2.9	-3	-3.3	-3.6	-3.7	-3.8	-3.8	-3.9	-4	-4	-4.1	-4	-4.1	-3.9	-3.7	-3.5	-3.5	-3.5	-3.5	-3.4	-2.9	-3	-3	-2.9	-2.7	-2.8	-2.5	-2.3
XZ009	申扎县	2020-01-14 23:00:00	-6.7	-4.9	-4.1	-3.7	-3.4	-3.4	-3.4	-3.7	-3.7	-3.7	-3.7	-3.9	-3.9	-3.9	-4	-3.9	-4	-3.8	-3.7	-3.4	-3.5	-3.5	-3.5	-3.4	-2.9	-3	-3	-2.8	-2.7	-2.7	-2.5	-2.3
XZ009	申扎县	2020-01-15 00:00:00	-7.7	-5.8	-4.9	-4.4	-3.9	-3.7	-3.7	-3.8	-3.8	-3.8	-3.8	-3.8	-3.8	-3.8	-3.9	-3.9	-4	-3.7	-3.6	-3.4	-3.5	-3.5	-3.5	-3.4	-2.9	-3	-3	-2.9	-2.7	-2.8	-2.5	-2.3
XZ009	申扎县	2020-01-15 01:00:00	-8.1	-6.5	-5.6	-5	-4.4	-4.1	-4	-4	-3.9	-3.9	-3.9	-3.8	-3.8	-3.7	-3.9	-3.8	-3.9	-3.7	-3.5	-3.4	-3.4	-3.5	-3.5	-3.4	-2.9	-3	-3	-2.9	-2.7	-2.7	-2.5	-2.3
XZ009	申扎县	2020-01-15 02:00:00	-8.7	-7	-6	-5.5	-4.9	-4.5	-4.2	-4.2	-4.1	-4	-4	-3.9	-3.9	-3.7	-3.8	-3.7	-3.9	-3.6	-3.5	-3.3	-3.4	-3.4	-3.5	-3.4	-2.9	-3	-3	-2.8	-2.7	-2.7	-2.6	-2.3
XZ009	申扎县	2020-01-15 03:00:00	-8.9	-7.4	-6.5	-5.9	-5.2	-4.8	-4.5	-4.5	-4.3	-4	-4	-4	-3.9	-3.7	-3.8	-3.7	-3.9	-3.5	-3.5	-3.3	-3.4	-3.4	-3.4	-3.4	-2.9	-3	-3	-2.8	-2.7	-2.7	-2.5	-2.3
XZ009	申扎县	2020-01-15 04:00:00	-9	-7.7	-6.9	-6.3	-5.5	-5.1	-4.8	-4.7	-4.5	-4.2	-4.2	-4.1	-4	-3.8	-3.8	-3.7	-3.8	-3.5	-3.4	-3.2	-3.4	-3.4	-3.4	-3.3	-2.8	-3	-2.9	-2.8	-2.7	-2.7	-2.5	-2.3
XZ009	申扎县	2020-01-15 05:00:00	-9.2	-7.9	-7.1	-6.5	-5.9	-5.4	-5	-4.9	-4.7	-4.4	-4.4	-4.2	-4	-3.8	-3.8	-3.7	-3.9	-3.5	-3.4	-3.2	-3.3	-3.4	-3.4	-3.3	-2.8	-2.9	-2.9	-2.8	-2.7	-2.7	-2.5	-2.3
XZ009	申扎县	2020-01-15 06:00:00	-9.7	-8.2	-7.4	-6.9	-6.2	-5.7	-5.3	-5.2	-4.9	-4.5	-4.5	-4.4	-4.2	-3.9	-3.9	-3.7	-3.8	-3.5	-3.4	-3.2	-3.3	-3.3	-3.4	-3.3	-2.8	-2.9	-2.9	-2.8	-2.7	-2.7	-2.5	-2.2
XZ009	申扎县	2020-01-15 07:00:00	-10	-8.6	-7.7	-7.2	-6.4	-5.9	-5.5	-5.3	-5	-4.7	-4.7	-4.5	-4.2	-3.9	-3.9	-3.7	-3.8	-3.5	-3.4	-3.2	-3.3	-3.3	-3.4	-3.2	-2.7	-2.9	-2.9	-2.7	-2.6	-2.7	-2.5	-2.3
XZ009	申扎县	2020-01-15 08:00:00	-10.6	-8.9	-8	-7.4	-6.7	-6.2	-5.7	-5.5	-5.2	-4.9	-4.9	-4.6	-4.4	-4	-3.9	-3.8	-3.9	-3.5	-3.4	-3.2	-3.3	-3.3	-3.3	-3.2	-2.7	-2.9	-2.9	-2.7	-2.6	-2.7	-2.5	-2.2
XZ009	申扎县	2020-01-15 09:00:00	-11.5	-9.5	-8.5	-7.9	-7	-6.4	-6	-5.7	-5.4	-5	-5	-4.8	-4.5	-4	-4	-3.9	-3.9	-3.5	-3.4	-3.2	-3.2	-3.3	-3.3	-3.2	-2.7	-2.9	-2.9	-2.7	-2.6	-2.7	-2.5	-2.2
XZ009	申扎县	2020-01-15 10:00:00	-11.2	-9.9	-8.9	-8.2	-7.4	-6.7	-6.2	-5.9	-5.6	-5.2	-5.2	-4.9	-4.6	-4.1	-4	-3.9	-3.9	-3.6	-3.4	-3.2	-3.2	-3.3	-3.3	-3.2	-2.7	-2.9	-2.9	-2.7	-2.6	-2.7	-2.5	-2.2
XZ009	申扎县	2020-01-15 11:00:00	-8.8	-9	-8.7	-8.3	-7.5	-6.9	-6.5	-6.2	-5.8	-5.4	-5.4	-5	-4.7	-4.2	-4.1	-3.9	-4	-3.6	-3.4	-3.2	-3.3	-3.3	-3.3	-3.2	-2.7	-2.9	-2.9	-2.7	-2.6	-2.6	-2.5	-2.2
XZ009	申扎县	2020-01-15 12:00:00	-6.2	-7.4	-7.8	-7.7	-7.3	-6.9	-6.5	-6.3	-5.9	-5.5	-5.5	-5.2	-4.9	-4.3	-4.2	-4	-4	-3.7	-3.5	-3.2	-3.3	-3.3	-3.4	-3.2	-2.7	-2.9	-2.8	-2.7	-2.6	-2.7	-2.4	-2.2
XZ009	申扎县	2020-01-15 13:00:00	-3.4	-5.5	-6.4	-6.8	-6.7	-6.5	-6.4	-6.2	-6	-5.6	-5.6	-5.3	-5	-4.4	-4.3	-4	-4	-3.7	-3.5	-3.3	-3.3	-3.4	-3.4	-3.2	-2.7	-2.9	-2.9	-2.7	-2.6	-2.6	-2.5	-2.2
XZ009	申扎县	2020-01-15 14:00:00	-1	-3.7	-4.9	-5.6	-5.8	-5.9	-6	-6	-5.9	-5.5	-5.5	-5.3	-5	-4.5	-4.4	-4.1	-4.1	-3.8	-3.5	-3.3	-3.4	-3.4	-3.4	-3.2	-2.7	-2.9	-2.8	-2.7	-2.6	-2.6	-2.4	-2.2
XZ009	申扎县	2020-01-15 15:00:00	0.3	-2.2	-3.7	-4.5	-4.9	-5.2	-5.5	-5.7	-5.6	-5.4	-5.4	-5.2	-5	-4.5	-4.4	-4.2	-4.2	-3.8	-3.6	-3.4	-3.4	-3.4	-3.4	-3.2	-2.7	-2.9	-2.9	-2.7	-2.5	-2.6	-2.4	-2.2
XZ009	申扎县	2020-01-15 16:00:00	1.5	-1.2	-2.6	-3.5	-4	-4.5	-4.9	-5.2	-5.3	-5.2	-5.2	-5.1	-4.9	-4.5	-4.4	-4.2	-4.2	-3.9	-3.6	-3.4	-3.4	-3.4	-3.4	-3.2	-2.7	-2.9	-2.9	-2.7	-2.5	-2.6	-2.4	-2.2
XZ009	申扎县	2020-01-15 17:00:00	2.3	-0.3	-1.8	-2.7	-3.4	-3.9	-4.4	-4.8	-4.9	-4.9	-4.9	-4.9	-4.7	-4.5	-4.4	-4.2	-4.2	-3.9	-3.7	-3.4	-3.4	-3.4	-3.4	-3.3	-2.7	-2.9	-2.9	-2.7	-2.5	-2.6	-2.4	-2.2
XZ009	申扎县	2020-01-15 18:00:00	2	0	-1.3	-2.2	-2.7	-3.4	-3.9	-4.4	-4.5	-4.6	-4.6	-4.6	-4.6	-4.4	-4.3	-4.2	-4.2	-3.9	-3.7	-3.4	-3.4	-3.4	-3.4	-3.3	-2.7	-2.9	-2.9	-2.7	-2.5	-2.6	-2.4	-2.2
XZ009	申扎县	2020-01-15 19:00:00	0.6	-0.3	-1.1	-1.9	-2.4	-3	-3.5	-4	-4.2	-4.3	-4.3	-4.4	-4.4	-4.2	-4.2	-4.1	-4.2	-3.9	-3.7	-3.4	-3.4	-3.4	-3.4	-3.3	-2.8	-2.9	-2.9	-2.7	-2.6	-2.6	-2.4	-2.2
XZ009	申扎县	2020-01-15 20:00:00	-2.3	-1.6	-1.6	-2	-2.3	-2.7	-3.2	-3.7	-3.9	-4	-4	-4.1	-4.2	-4.1	-4.2	-4	-4.1	-3.8	-3.6	-3.4	-3.4	-3.5	-3.4	-3.3	-2.8	-2.9	-2.9	-2.7	-2.6	-2.6	-2.5	-2.2
XZ009	申扎县	2020-01-15 21:00:00	-4.9	-3.2	-2.7	-2.5	-2.5	-2.8	-3.2	-3.5	-3.7	-3.9	-3.9	-3.9	-4	-4	-4	-4	-4	-3.7	-3.6	-3.4	-3.4	-3.4	-3.4	-3.3	-2.8	-2.9	-2.9	-2.7	-2.6	-2.6	-2.5	-2.2
XZ009	申扎县	2020-01-15 22:00:00	-6.3	-4.5	-3.7	-3.4	-3	-3	-3.2	-3.5	-3.6	-3.7	-3.7	-3.8	-3.9	-3.9	-4	-3.9	-4	-3.7	-3.5	-3.4	-3.4	-3.4	-3.4	-3.3	-2.8	-2.9	-2.9	-2.7	-2.6	-2.6	-2.4	-2.2
XZ009	申扎县	2020-01-15 23:00:00	-7.5	-5.5	-4.6	-4.1	-3.6	-3.4	-3.4	-3.6	-3.7	-3.7	-3.7	-3.7	-3.7	-3.8	-3.9	-3.8	-3.9	-3.7	-3.5	-3.3	-3.4	-3.4	-3.4	-3.3	-2.7	-2.9	-2.9	-2.7	-2.6	-2.6	-2.4	-2.2
XZ009	申扎县	2020-01-16 00:00:00	-8.5	-6.4	-5.4	-4.8	-4.1	-3.9	-3.7	-3.8	-3.8	-3.7	-3.7	-3.7	-3.7	-3.7	-3.8	-3.7	-3.9	-3.6	-3.5	-3.3	-3.4	-3.4	-3.4	-3.2	-2.7	-2.9	-2.9	-2.7	-2.6	-2.6	-2.4	-2.2
XZ009	申扎县	2020-01-16 01:00:00	-9.4	-7.2	-6.1	-5.4	-4.7	-4.3	-4	-4	-3.9	-3.8	-3.8	-3.7	-3.7	-3.7	-3.7	-3.7	-3.8	-3.5	-3.4	-3.2	-3.3	-3.3	-3.4	-3.2	-2.7	-2.9	-2.9	-2.7	-2.6	-2.7	-2.4	-2.2
XZ009	申扎县	2020-01-16 02:00:00	-10	-7.9	-6.7	-6	-5.2	-4.7	-4.4	-4.3	-4.1	-3.9	-3.9	-3.9	-3.7	-3.7	-3.7	-3.6	-3.7	-3.5	-3.4	-3.2	-3.2	-3.3	-3.3	-3.2	-2.7	-2.9	-2.9	-2.7	-2.6	-2.6	-2.5	-2.2
XZ009	申扎县	2020-01-16 03:00:00	-10.7	-8.5	-7.3	-6.5	-5.7	-5.1	-4.7	-4.6	-4.4	-4.1	-4.1	-4	-3.9	-3.7	-3.7	-3.6	-3.7	-3.5	-3.4	-3.2	-3.2	-3.2	-3.3	-3.2	-2.7	-2.9	-2.9	-2.7	-2.5	-2.6	-2.4	-2.2
XZ009	申扎县	2020-01-16 04:00:00	-11.3	-9	-7.8	-7	-6.1	-5.5	-5.1	-4.9	-4.6	-4.3	-4.3	-4.1	-3.9	-3.7	-3.7	-3.6	-3.7	-3.4	-3.3	-3.1	-3.2	-3.2	-3.3	-3.2	-2.7	-2.9	-2.8	-2.7	-2.5	-2.6	-2.4	-2.2
XZ009	申扎县	2020-01-16 05:00:00	-11.9	-9.6	-8.4	-7.5	-6.5	-5.9	-5.4	-5.2	-4.9	-4.5	-4.5	-4.3	-4	-3.7	-3.7	-3.6	-3.7	-3.4	-3.3	-3.1	-3.2	-3.2	-3.2	-3.2	-2.7	-2.8	-2.8	-2.7	-2.5	-2.6	-2.4	-2.2
XZ009	申扎县	2020-01-16 06:00:00	-12.2	-10	-8.8	-7.9	-7	-6.3	-5.7	-5.5	-5	-4.7	-4.7	-4.4	-4.2	-3.9	-3.8	-3.7	-3.7	-3.4	-3.3	-3.1	-3.2	-3.2	-3.2	-3.1	-2.7	-2.8	-2.8	-2.7	-2.5	-2.6	-2.4	-2.2
XZ009	申扎县	2020-01-16 07:00:00	-12.4	-10.3	-9.2	-8.3	-7.3	-6.6	-6	-5.7	-5.4	-4.9	-4.9	-4.6	-4.4	-3.9	-3.9	-3.7	-3.7	-3.4	-3.3	-3.1	-3.2	-3.2	-3.2	-3.1	-2.6	-2.8	-2.8	-2.6	-2.5	-2.6	-2.4	-2.2
XZ009	申扎县	2020-01-16 08:00:00	-12.9	-10.7	-9.5	-8.7	-7.7	-6.9	-6.4	-6	-5.5	-5.1	-5.1	-4.8	-4.5	-4	-3.9	-3.7	-3.8	-3.5	-3.3	-3	-3.2	-3.2	-3.2	-3.1	-2.7	-2.8	-2.7	-2.6	-2.5	-2.6	-2.4	-2.2
XZ009	申扎县	2020-01-16 09:00:00	-13.1	-11	-9.9	-9	-8	-7.2	-6.6	-6.2	-5.8	-5.3	-5.3	-5	-4.7	-4.1	-4	-3.8	-3.8	-3.5	-3.3	-3.1	-3.2	-3.2	-3.2	-3.1	-2.6	-2.8	-2.7	-2.6	-2.5	-2.5	-2.4	-2.2
XZ009	申扎县	2020-01-16 10:00:00	-13	-11.3	-10.2	-9.3	-8.3	-7.5	-6.9	-6.5	-6	-5.5	-5.5	-5.2	-4.8	-4.2	-4.1	-3.9	-3.9	-3.5	-3.4	-3.2	-3.2	-3.2	-3.2	-3.1	-2.6	-2.8	-2.7	-2.6	-2.5	-2.5	-2.4	-2.2
XZ009	申扎县	2020-01-16 11:00:00	-9.7	-10.1	-9.8	-9.3	-8.4	-7.7	-7.1	-6.7	-6.2	-5.7	-5.7	-5.4	-5	-4.3	-4.2	-4	-4	-3.6	-3.4	-3.2	-3.2	-3.2	-3.2	-3.1	-2.6	-2.7	-2.7	-2.6	-2.5	-2.6	-2.4	-2.2
XZ009	申扎县	2020-01-16 12:00:00	-5.5	-7.8	-8.5	-8.5	-8	-7.6	-7.2	-6.9	-6.4	-5.9	-5.9	-5.5	-5.1	-4.4	-4.3	-4	-4	-3.7	-3.5	-3.2	-3.2	-3.2	-3.2	-3.2	-2.6	-2.8	-2.7	-2.6	-2.5	-2.5	-2.4	-2.2
XZ009	申扎县	2020-01-16 13:00:00	-1.5	-5.1	-6.5	-7.1	-7.2	-7.1	-6.9	-6.8	-6.4	-6	-6	-5.6	-5.2	-4.5	-4.4	-4.1	-4.1	-3.7	-3.5	-3.2	-3.2	-3.3	-3.3	-3.2	-2.6	-2.8	-2.7	-2.6	-2.5	-2.5	-2.4	-2.1
XZ009	申扎县	2020-01-16 14:00:00	1.5	-2.6	-4.5	-5.5	-6	-6.2	-6.4	-6.5	-6.2	-5.9	-5.9	-5.6	-5.3	-4.6	-4.5	-4.2	-4.2	-3.8	-3.5	-3.3	-3.3	-3.3	-3.3	-3.2	-2.7	-2.8	-2.7	-2.6	-2.5	-2.5	-2.4	-2.1
XZ009	申扎县	2020-01-16 15:00:00	3.6	-0.5	-2.7	-4	-4.7	-5.3	-5.7	-6	-5.9	-5.7	-5.7	-5.5	-5.2	-4.7	-4.5	-4.2	-4.2	-3.9	-3.6	-3.4	-3.4	-3.4	-3.3	-3.2	-2.7	-2.8	-2.7	-2.6	-2.5	-2.5	-2.4	-2.2
XZ009	申扎县	2020-01-16 16:00:00	3.3	0	-1.7	-2.9	-3.7	-4.4	-5	-5.4	-5.5	-5.4	-5.4	-5.3	-5.2	-4.7	-4.5	-4.3	-4.3	-3.9	-3.7	-3.4	-3.4	-3.4	-3.4	-3.2	-2.7	-2.8	-2.8	-2.6	-2.5	-2.5	-2.4	-2.1
XZ009	申扎县	2020-01-16 17:00:00	2.9	0.3	-1.2	-2.3	-3	-3.7	-4.4	-4.9	-5	-5	-5	-5	-4.9	-4.6	-4.5	-4.3	-4.3	-3.9	-3.7	-3.4	-3.4	-3.4	-3.4	-3.2	-2.7	-2.9	-2.8	-2.6	-2.5	-2.5	-2.4	-2.2
XZ009	申扎县	2020-01-16 18:00:00	1.9	0.1	-0.9	-1.9	-2.5	-3.2	-3.9	-4.4	-4.6	-4.7	-4.7	-4.7	-4.7	-4.5	-4.4	-4.2	-4.3	-3.9	-3.7	-3.4	-3.5	-3.4	-3.4	-3.2	-2.7	-2.9	-2.8	-2.6	-2.5	-2.5	-2.4	-2.1
XZ009	申扎县	2020-01-16 19:00:00	0.5	-0.2	-1	-1.7	-2.3	-2.9	-3.5	-4	-4.2	-4.4	-4.4	-4.5	-4.5	-4.4	-4.4	-4.2	-4.2	-3.9	-3.7	-3.5	-3.5	-3.4	-3.4	-3.3	-2.7	-2.9	-2.8	-2.7	-2.5	-2.5	-2.4	-2.2
XZ009	申扎县	2020-01-16 20:00:00	-0.9	-1	-1.4	-1.8	-2.2	-2.7	-3.2	-3.7	-3.9	-4.1	-4.1	-4.2	-4.2	-4.2	-4.2	-4.1	-4.2	-3.9	-3.7	-3.4	-3.4	-3.4	-3.4	-3.3	-2.7	-2.9	-2.8	-2.7	-2.5	-2.6	-2.4	-2.2
XZ009	申扎县	2020-01-16 21:00:00	-2.6	-2	-2	-2.2	-2.3	-2.7	-3	-3.5	-3.7	-3.9	-3.9	-4	-4.1	-4.1	-4.1	-4	-4.1	-3.8	-3.6	-3.4	-3.4	-3.4	-3.4	-3.3	-2.8	-2.9	-2.9	-2.7	-2.5	-2.6	-2.4	-2.2
XZ009	申扎县	2020-01-16 22:00:00	-4.4	-3.2	-2.7	-2.7	-2.6	-2.8	-3	-3.4	-3.6	-3.7	-3.7	-3.8	-3.9	-3.9	-4	-3.9	-4	-3.7	-3.6	-3.4	-3.4	-3.4	-3.4	-3.3	-2.7	-2.9	-2.9	-2.7	-2.5	-2.6	-2.4	-2.2
XZ009	申扎县	2020-01-16 23:00:00	-5.3	-4.1	-3.5	-3.2	-3	-3	-3.2	-3.4	-3.5	-3.6	-3.6	-3.7	-3.8	-3.8	-3.9	-3.9	-4	-3.7	-3.5	-3.4	-3.4	-3.4	-3.4	-3.3	-2.7	-2.9	-2.9	-2.7	-2.5	-2.6	-2.4	-2.2
XZ009	申扎县	2020-01-17 00:00:00	-5.2	-4.5	-4	-3.7	-3.4	-3.3	-3.4	-3.5	-3.6	-3.6	-3.6	-3.7	-3.7	-3.7	-3.8	-3.7	-3.9	-3.6	-3.5	-3.3	-3.4	-3.4	-3.4	-3.3	-2.8	-2.9	-2.9	-2.7	-2.5	-2.6	-2.4	-2.2
XZ009	申扎县	2020-01-17 01:00:00	-5.9	-4.9	-4.4	-4.1	-3.7	-3.5	-3.5	-3.7	-3.7	-3.6	-3.6	-3.7	-3.7	-3.7	-3.7	-3.7	-3.8	-3.5	-3.4	-3.2	-3.3	-3.4	-3.4	-3.2	-2.7	-2.9	-2.9	-2.7	-2.5	-2.6	-2.4	-2.2
XZ009	申扎县	2020-01-17 02:00:00	-6.7	-5.5	-4.9	-4.5	-4	-3.8	-3.7	-3.8	-3.7	-3.7	-3.7	-3.7	-3.7	-3.6	-3.7	-3.6	-3.7	-3.5	-3.4	-3.2	-3.3	-3.3	-3.3	-3.2	-2.7	-2.9	-2.8	-2.7	-2.5	-2.6	-2.4	-2.2
XZ009	申扎县	2020-01-17 03:00:00	-7.3	-6	-5.3	-4.9	-4.4	-4	-3.9	-4	-3.9	-3.7	-3.7	-3.7	-3.7	-3.6	-3.7	-3.5	-3.7	-3.4	-3.4	-3.2	-3.2	-3.2	-3.3	-3.2	-2.7	-2.9	-2.9	-2.7	-2.5	-2.6	-2.4	-2.2
XZ009	申扎县	2020-01-17 04:00:00	-7.5	-6.4	-5.7	-5.2	-4.7	-4.4	-4.2	-4.2	-4	-3.9	-3.9	-3.8	-3.7	-3.5	-3.6	-3.5	-3.7	-3.4	-3.3	-3.1	-3.2	-3.2	-3.2	-3.2	-2.7	-2.8	-2.8	-2.7	-2.5	-2.6	-2.4	-2.2
XZ009	申扎县	2020-01-17 05:00:00	-8.2	-6.8	-6	-5.5	-5	-4.6	-4.4	-4.4	-4.2	-4	-4	-3.9	-3.7	-3.6	-3.6	-3.5	-3.6	-3.4	-3.2	-3	-3.2	-3.2	-3.2	-3.1	-2.7	-2.8	-2.8	-2.7	-2.5	-2.5	-2.4	-2.2
XZ009	申扎县	2020-01-17 06:00:00	-9	-7.4	-6.5	-5.9	-5.3	-4.9	-4.6	-4.5	-4.3	-4	-4	-3.9	-3.8	-3.6	-3.7	-3.5	-3.6	-3.4	-3.2	-3	-3.1	-3.2	-3.2	-3.1	-2.7	-2.8	-2.8	-2.6	-2.5	-2.6	-2.4	-2.2
XZ009	申扎县	2020-01-17 07:00:00	-9.6	-7.9	-6.9	-6.4	-5.6	-5.1	-4.9	-4.7	-4.5	-4.2	-4.2	-4	-3.9	-3.7	-3.6	-3.5	-3.6	-3.4	-3.2	-3	-3.1	-3.1	-3.2	-3.1	-2.6	-2.8	-2.8	-2.6	-2.5	-2.5	-2.4	-2.2
XZ009	申扎县	2020-01-17 08:00:00	-10	-8.3	-7.4	-6.7	-6	-5.4	-5	-4.9	-4.7	-4.4	-4.4	-4.2	-4	-3.7	-3.7	-3.5	-3.6	-3.4	-3.2	-3	-3	-3.2	-3.2	-3.1	-2.6	-2.7	-2.7	-2.6	-2.5	-2.5	-2.4	-2.2
XZ009	申扎县	2020-01-17 09:00:00	-10.4	-8.7	-7.7	-7	-6.3	-5.7	-5.4	-5.2	-4.9	-4.5	-4.5	-4.3	-4.1	-3.7	-3.7	-3.5	-3.7	-3.4	-3.2	-3	-3.1	-3.1	-3.2	-3.1	-2.6	-2.7	-2.7	-2.6	-2.5	-2.5	-2.4	-2.2
XZ009	申扎县	2020-01-17 10:00:00	-9.8	-8.7	-7.9	-7.4	-6.5	-6	-5.6	-5.4	-5	-4.7	-4.7	-4.4	-4.2	-3.8	-3.7	-3.6	-3.7	-3.4	-3.2	-3	-3.1	-3.1	-3.2	-3	-2.5	-2.7	-2.7	-2.5	-2.5	-2.5	-2.4	-2.1
XZ009	申扎县	2020-01-17 11:00:00	-6.7	-7.5	-7.5	-7.3	-6.7	-6.2	-5.8	-5.5	-5.2	-4.8	-4.8	-4.5	-4.3	-3.9	-3.8	-3.7	-3.7	-3.4	-3.2	-3	-3.1	-3.1	-3.1	-3	-2.5	-2.7	-2.7	-2.5	-2.5	-2.5	-2.4	-2.1
XZ009	申扎县	2020-01-17 12:00:00	-3.9	-5.7	-6.4	-6.5	-6.3	-6	-5.8	-5.6	-5.3	-5	-5	-4.7	-4.4	-3.9	-3.9	-3.7	-3.7	-3.4	-3.2	-3	-3.1	-3.1	-3.1	-3	-2.5	-2.7	-2.7	-2.5	-2.4	-2.5	-2.4	-2.1
XZ009	申扎县	2020-01-17 13:00:00	-1.9	-4.2	-5.2	-5.6	-5.6	-5.6	-5.6	-5.5	-5.3	-5	-5	-4.8	-4.5	-4	-3.9	-3.8	-3.8	-3.4	-3.3	-3	-3.1	-3.1	-3.1	-3	-2.5	-2.7	-2.7	-2.5	-2.5	-2.5	-2.4	-2.1
XZ009	申扎县	2020-01-17 14:00:00	-0.4	-2.9	-4	-4.7	-4.9	-5.1	-5.2	-5.4	-5.2	-5	-5	-4.8	-4.5	-4.1	-4	-3.8	-3.8	-3.5	-3.3	-3.1	-3.1	-3.2	-3.2	-3	-2.5	-2.7	-2.7	-2.5	-2.4	-2.5	-2.3	-2
XZ009	申扎县	2020-01-17 15:00:00	0.6	-1.8	-3	-3.9	-4.2	-4.5	-4.8	-5	-4.9	-4.8	-4.8	-4.7	-4.5	-4.1	-4	-3.8	-3.9	-3.5	-3.4	-3.1	-3.2	-3.2	-3.2	-3	-2.5	-2.7	-2.7	-2.5	-2.4	-2.5	-2.3	-2.1
XZ009	申扎县	2020-01-17 16:00:00	1	-1	-2.3	-3.1	-3.5	-3.9	-4.4	-4.7	-4.7	-4.6	-4.6	-4.5	-4.4	-4.1	-4	-3.9	-3.9	-3.5	-3.4	-3.1	-3.2	-3.2	-3.2	-3.1	-2.5	-2.7	-2.7	-2.5	-2.4	-2.5	-2.3	-2.1
XZ009	申扎县	2020-01-17 17:00:00	0.4	-0.9	-1.9	-2.6	-3	-3.5	-3.9	-4.3	-4.4	-4.4	-4.4	-4.4	-4.3	-4	-4	-3.9	-3.9	-3.5	-3.4	-3.2	-3.2	-3.2	-3.2	-3	-2.6	-2.7	-2.7	-2.5	-2.4	-2.5	-2.3	-2.1
XZ009	申扎县	2020-01-17 18:00:00	0.5	-0.9	-1.7	-2.4	-2.7	-3.1	-3.5	-3.9	-4.1	-4.2	-4.2	-4.2	-4.2	-4	-4	-3.8	-3.9	-3.5	-3.4	-3.1	-3.2	-3.2	-3.2	-3	-2.5	-2.7	-2.7	-2.5	-2.4	-2.5	-2.3	-2
XZ009	申扎县	2020-01-17 19:00:00	-0.4	-1.1	-1.7	-2.2	-2.5	-2.9	-3.3	-3.7	-3.9	-3.9	-3.9	-4	-4	-3.9	-3.9	-3.8	-3.9	-3.5	-3.4	-3.1	-3.2	-3.2	-3.2	-3.1	-2.5	-2.7	-2.7	-2.5	-2.4	-2.5	-2.3	-2.1
XZ009	申扎县	2020-01-17 20:00:00	-1.8	-1.9	-2	-2.2	-2.4	-2.7	-3.1	-3.5	-3.7	-3.7	-3.7	-3.8	-3.9	-3.7	-3.8	-3.7	-3.8	-3.5	-3.4	-3.1	-3.2	-3.2	-3.2	-3.1	-2.6	-2.7	-2.7	-2.5	-2.4	-2.5	-2.3	-2.1
XZ009	申扎县	2020-01-17 21:00:00	-3.2	-2.7	-2.5	-2.5	-2.5	-2.7	-3	-3.4	-3.5	-3.6	-3.6	-3.7	-3.7	-3.7	-3.7	-3.6	-3.7	-3.5	-3.3	-3.1	-3.2	-3.2	-3.2	-3	-2.6	-2.7	-2.7	-2.5	-2.4	-2.5	-2.3	-2.1
XZ009	申扎县	2020-01-17 22:00:00	-4.2	-3.4	-3	-3	-2.8	-2.9	-3	-3.3	-3.4	-3.5	-3.5	-3.5	-3.5	-3.5	-3.7	-3.5	-3.7	-3.4	-3.3	-3.1	-3.1	-3.2	-3.2	-3	-2.6	-2.7	-2.7	-2.5	-2.5	-2.5	-2.3	-2
XZ009	申扎县	2020-01-17 23:00:00	-4.7	-4	-3.6	-3.4	-3.1	-3	-3.2	-3.4	-3.4	-3.4	-3.4	-3.5	-3.5	-3.5	-3.6	-3.5	-3.6	-3.4	-3.2	-3	-3.1	-3.1	-3.2	-3	-2.5	-2.7	-2.7	-2.5	-2.4	-2.5	-2.3	-2
XZ009	申扎县	2020-01-18 00:00:00	-5.2	-4.4	-4	-3.7	-3.4	-3.3	-3.3	-3.4	-3.4	-3.4	-3.4	-3.4	-3.4	-3.4	-3.5	-3.4	-3.5	-3.3	-3.2	-3	-3.1	-3.1	-3.2	-3	-2.5	-2.7	-2.7	-2.5	-2.4	-2.5	-2.4	-2.1
XZ009	申扎县	2020-01-18 01:00:00	-5.9	-4.9	-4.4	-4.1	-3.7	-3.5	-3.5	-3.5	-3.5	-3.4	-3.4	-3.4	-3.4	-3.4	-3.5	-3.4	-3.5	-3.3	-3.2	-3	-3	-3.1	-3.1	-3	-2.5	-2.7	-2.7	-2.5	-2.4	-2.5	-2.3	-2.1
XZ009	申扎县	2020-01-18 02:00:00	-7	-5.5	-4.9	-4.4	-4	-3.7	-3.6	-3.7	-3.6	-3.5	-3.5	-3.5	-3.4	-3.4	-3.4	-3.4	-3.5	-3.2	-3.1	-2.9	-3	-3	-3.1	-3	-2.5	-2.7	-2.7	-2.5	-2.4	-2.5	-2.3	-2
XZ009	申扎县	2020-01-18 03:00:00	-8.1	-6.4	-5.4	-4.9	-4.4	-4	-3.9	-3.9	-3.7	-3.6	-3.6	-3.5	-3.4	-3.4	-3.4	-3.3	-3.4	-3.2	-3.1	-2.9	-3	-3	-3	-3	-2.5	-2.7	-2.7	-2.5	-2.4	-2.5	-2.3	-2.1
XZ009	申扎县	2020-01-18 04:00:00	-7.5	-6.6	-5.9	-5.4	-4.7	-4.4	-4.1	-4	-3.9	-3.7	-3.7	-3.6	-3.5	-3.4	-3.4	-3.3	-3.4	-3.2	-3	-2.9	-2.9	-3	-3	-3	-2.5	-2.7	-2.6	-2.5	-2.4	-2.5	-2.3	-2.1
XZ009	申扎县	2020-01-18 05:00:00	-7.2	-6.4	-5.9	-5.5	-4.9	-4.5	-4.4	-4.2	-4	-3.8	-3.8	-3.7	-3.5	-3.4	-3.4	-3.3	-3.4	-3.2	-3	-2.9	-2.9	-3	-3	-2.9	-2.5	-2.7	-2.6	-2.5	-2.4	-2.4	-2.3	-2
XZ009	申扎县	2020-01-18 06:00:00	-7.5	-6.5	-6	-5.6	-5	-4.7	-4.5	-4.4	-4.2	-4	-4	-3.8	-3.6	-3.4	-3.4	-3.3	-3.4	-3.2	-3	-2.9	-2.9	-3	-3	-2.9	-2.4	-2.6	-2.6	-2.5	-2.4	-2.5	-2.3	-2
XZ009	申扎县	2020-01-18 07:00:00	-7.7	-6.7	-6.2	-5.8	-5.2	-4.9	-4.6	-4.5	-4.3	-4	-4	-3.9	-3.7	-3.5	-3.5	-3.3	-3.4	-3.1	-3	-2.9	-2.9	-2.9	-3	-2.9	-2.4	-2.6	-2.6	-2.5	-2.4	-2.5	-2.3	-2
XZ009	申扎县	2020-01-18 08:00:00	-8.5	-7.2	-6.4	-6	-5.4	-5	-4.8	-4.7	-4.4	-4.2	-4.2	-4	-3.8	-3.5	-3.5	-3.4	-3.4	-3.2	-3	-2.9	-2.9	-2.9	-3	-2.9	-2.4	-2.6	-2.6	-2.5	-2.4	-2.5	-2.3	-2
XZ009	申扎县	2020-01-18 09:00:00	-9.4	-7.8	-6.9	-6.3	-5.7	-5.2	-4.9	-4.8	-4.5	-4.2	-4.2	-4	-3.9	-3.5	-3.5	-3.4	-3.4	-3.2	-3	-2.8	-2.9	-2.9	-3	-2.9	-2.4	-2.6	-2.5	-2.4	-2.4	-2.4	-2.2	-2
XZ009	申扎县	2020-01-18 10:00:00	-9.2	-8	-7.2	-6.7	-6	-5.5	-5.1	-5	-4.7	-4.4	-4.4	-4.2	-3.9	-3.5	-3.5	-3.4	-3.5	-3.2	-3	-2.9	-2.9	-2.9	-3	-2.9	-2.4	-2.6	-2.6	-2.4	-2.4	-2.4	-2.2	-2
XZ009	申扎县	2020-01-18 11:00:00	-7.7	-7.5	-7.2	-6.8	-6.1	-5.7	-5.3	-5.2	-4.8	-4.5	-4.5	-4.3	-4	-3.7	-3.6	-3.4	-3.5	-3.2	-3	-2.8	-2.9	-2.9	-3	-2.9	-2.4	-2.6	-2.5	-2.4	-2.4	-2.4	-2.2	-2
XZ009	申扎县	2020-01-18 12:00:00	-5	-6.2	-6.5	-6.4	-6	-5.7	-5.4	-5.3	-5	-4.6	-4.6	-4.4	-4.1	-3.7	-3.7	-3.5	-3.5	-3.2	-3	-2.9	-2.9	-2.9	-3	-2.9	-2.4	-2.5	-2.5	-2.4	-2.4	-2.4	-2.2	-2
XZ009	申扎县	2020-01-18 13:00:00	-2.4	-4.4	-5.3	-5.6	-5.5	-5.4	-5.3	-5.2	-5	-4.7	-4.7	-4.4	-4.2	-3.8	-3.7	-3.5	-3.5	-3.2	-3.1	-2.9	-2.9	-2.9	-3	-2.9	-2.4	-2.6	-2.5	-2.4	-2.3	-2.4	-2.2	-2
XZ009	申扎县	2020-01-18 14:00:00	0	-2.7	-3.9	-4.5	-4.7	-4.9	-5	-5	-4.9	-4.7	-4.7	-4.5	-4.2	-3.8	-3.7	-3.5	-3.6	-3.3	-3.1	-2.9	-2.9	-3	-3	-2.9	-2.4	-2.5	-2.5	-2.4	-2.3	-2.4	-2.2	-2
XZ009	申扎县	2020-01-18 15:00:00	1.6	-1.2	-2.7	-3.5	-3.9	-4.2	-4.5	-4.7	-4.7	-4.5	-4.5	-4.4	-4.2	-3.9	-3.8	-3.6	-3.6	-3.3	-3.1	-2.9	-3	-3	-3	-2.9	-2.4	-2.6	-2.5	-2.4	-2.3	-2.4	-2.2	-2
XZ009	申扎县	2020-01-18 16:00:00	2	-0.3	-1.7	-2.6	-3.1	-3.6	-4	-4.4	-4.4	-4.4	-4.4	-4.3	-4.2	-3.9	-3.8	-3.6	-3.7	-3.4	-3.2	-2.9	-3	-3	-3	-2.9	-2.4	-2.5	-2.5	-2.4	-2.3	-2.4	-2.2	-2
XZ009	申扎县	2020-01-18 17:00:00	1.7	0	-1.3	-2	-2.5	-3	-3.5	-3.9	-4.1	-4	-4	-4.1	-4	-3.8	-3.7	-3.6	-3.7	-3.4	-3.2	-2.9	-3	-3	-3	-2.9	-2.4	-2.6	-2.5	-2.4	-2.3	-2.4	-2.2	-2
XZ009	申扎县	2020-01-18 18:00:00	0	-0.5	-1.2	-1.8	-2.2	-2.7	-3.2	-3.6	-3.8	-3.9	-3.9	-3.9	-3.9	-3.7	-3.7	-3.5	-3.7	-3.4	-3.2	-2.9	-3	-3	-3	-2.9	-2.4	-2.5	-2.5	-2.4	-2.3	-2.4	-2.2	-2
XZ009	申扎县	2020-01-18 19:00:00	-1.4	-1.3	-1.5	-1.9	-2	-2.5	-2.9	-3.3	-3.5	-3.6	-3.6	-3.7	-3.7	-3.6	-3.7	-3.5	-3.6	-3.3	-3.2	-2.9	-3	-3	-3	-2.9	-2.4	-2.6	-2.5	-2.4	-2.3	-2.4	-2.2	-2
XZ009	申扎县	2020-01-18 20:00:00	-3.1	-2.3	-2	-2.1	-2.2	-2.4	-2.8	-3.2	-3.3	-3.4	-3.4	-3.5	-3.5	-3.5	-3.6	-3.5	-3.5	-3.3	-3.2	-2.9	-3	-3	-3	-2.9	-2.4	-2.6	-2.5	-2.4	-2.4	-2.4	-2.2	-2
XZ009	申扎县	2020-01-18 21:00:00	-4.5	-3.3	-2.7	-2.6	-2.5	-2.5	-2.8	-3	-3.2	-3.3	-3.3	-3.4	-3.4	-3.4	-3.5	-3.4	-3.5	-3.2	-3.1	-2.9	-3	-3	-3	-2.9	-2.4	-2.5	-2.5	-2.4	-2.3	-2.4	-2.2	-2
XZ009	申扎县	2020-01-18 22:00:00	-5.6	-4.2	-3.5	-3.2	-2.9	-2.8	-2.9	-3.1	-3.2	-3.2	-3.2	-3.3	-3.4	-3.3	-3.4	-3.4	-3.5	-3.2	-3	-2.9	-2.9	-3	-3	-2.9	-2.4	-2.5	-2.5	-2.4	-2.4	-2.4	-2.2	-2
XZ009	申扎县	2020-01-18 23:00:00	-6.5	-4.9	-4.1	-3.7	-3.3	-3.1	-3.1	-3.2	-3.2	-3.2	-3.2	-3.2	-3.2	-3.2	-3.3	-3.2	-3.4	-3.2	-3	-2.8	-2.9	-3	-3	-2.9	-2.4	-2.6	-2.5	-2.4	-2.3	-2.4	-2.2	-2
XZ009	申扎县	2020-01-19 00:00:00	-7.5	-5.7	-4.8	-4.2	-3.7	-3.4	-3.3	-3.4	-3.3	-3.2	-3.2	-3.2	-3.2	-3.2	-3.3	-3.2	-3.4	-3.1	-3	-2.8	-2.9	-2.9	-3	-2.9	-2.4	-2.5	-2.5	-2.4	-2.3	-2.4	-2.2	-2
XZ009	申扎县	2020-01-19 01:00:00	-8.2	-6.4	-5.4	-4.8	-4.2	-3.8	-3.6	-3.6	-3.5	-3.4	-3.4	-3.3	-3.2	-3.2	-3.2	-3.2	-3.3	-3	-3	-2.7	-2.9	-2.9	-2.9	-2.9	-2.4	-2.5	-2.5	-2.4	-2.3	-2.4	-2.2	-2
XZ009	申扎县	2020-01-19 02:00:00	-9.2	-7.1	-6	-5.3	-4.5	-4.2	-3.9	-3.8	-3.7	-3.5	-3.5	-3.4	-3.3	-3.2	-3.2	-3.1	-3.3	-3	-2.9	-2.7	-2.9	-2.9	-2.9	-2.9	-2.4	-2.5	-2.5	-2.4	-2.3	-2.4	-2.2	-2
XZ009	申扎县	2020-01-19 03:00:00	-9.9	-7.8	-6.6	-5.9	-5	-4.5	-4.2	-4	-3.9	-3.6	-3.6	-3.5	-3.4	-3.2	-3.2	-3.1	-3.2	-3	-2.9	-2.7	-2.8	-2.9	-2.9	-2.8	-2.4	-2.5	-2.5	-2.4	-2.3	-2.4	-2.2	-2
XZ009	申扎县	2020-01-19 04:00:00	-9.5	-8	-7	-6.3	-5.5	-4.9	-4.5	-4.3	-4	-3.8	-3.8	-3.6	-3.4	-3.2	-3.2	-3.2	-3.2	-3	-2.9	-2.7	-2.8	-2.9	-2.9	-2.8	-2.4	-2.5	-2.5	-2.4	-2.3	-2.4	-2.2	-2
XZ009	申扎县	2020-01-19 05:00:00	-9.6	-8.1	-7.2	-6.5	-5.8	-5.2	-4.8	-4.6	-4.2	-4	-4	-3.7	-3.5	-3.3	-3.3	-3.2	-3.2	-3	-2.9	-2.7	-2.8	-2.8	-2.9	-2.8	-2.3	-2.5	-2.5	-2.4	-2.3	-2.4	-2.2	-2
XZ009	申扎县	2020-01-19 06:00:00	-10.2	-8.4	-7.5	-6.9	-6	-5.5	-5	-4.8	-4.5	-4.2	-4.2	-3.9	-3.7	-3.4	-3.3	-3.2	-3.3	-3	-2.9	-2.7	-2.8	-2.8	-2.9	-2.8	-2.3	-2.5	-2.5	-2.4	-2.3	-2.4	-2.2	-2
XZ009	申扎县	2020-01-19 07:00:00	-10.5	-8.7	-7.8	-7.1	-6.3	-5.7	-5.3	-5	-4.7	-4.3	-4.3	-4	-3.8	-3.4	-3.4	-3.2	-3.3	-3	-2.9	-2.7	-2.8	-2.8	-2.9	-2.8	-2.3	-2.5	-2.5	-2.4	-2.2	-2.4	-2.2	-1.9
XZ009	申扎县	2020-01-19 08:00:00	-11.6	-9.4	-8.2	-7.5	-6.6	-6	-5.5	-5.2	-4.9	-4.5	-4.5	-4.2	-3.9	-3.5	-3.5	-3.3	-3.4	-3	-2.9	-2.7	-2.7	-2.8	-2.9	-2.7	-2.3	-2.5	-2.5	-2.4	-2.2	-2.3	-2.2	-1.9
XZ009	申扎县	2020-01-19 09:00:00	-12.4	-10	-8.8	-7.9	-7	-6.3	-5.8	-5.5	-5.1	-4.7	-4.7	-4.4	-4	-3.6	-3.5	-3.3	-3.4	-3.1	-2.9	-2.7	-2.8	-2.8	-2.9	-2.7	-2.3	-2.5	-2.5	-2.4	-2.2	-2.4	-2.2	-1.9
XZ009	申扎县	2020-01-19 10:00:00	-12.4	-10.5	-9.3	-8.4	-7.4	-6.6	-6.1	-5.7	-5.3	-4.9	-4.9	-4.5	-4.2	-3.7	-3.6	-3.4	-3.4	-3.1	-3	-2.7	-2.8	-2.8	-2.9	-2.7	-2.3	-2.4	-2.4	-2.3	-2.2	-2.3	-2.2	-1.9
XZ009	申扎县	2020-01-19 11:00:00	-9.7	-9.6	-9.1	-8.5	-7.6	-6.9	-6.4	-6	-5.5	-5	-5	-4.7	-4.4	-3.8	-3.7	-3.5	-3.5	-3.2	-3	-2.7	-2.8	-2.9	-2.9	-2.8	-2.3	-2.4	-2.4	-2.3	-2.2	-2.3	-2.1	-1.9
XZ009	申扎县	2020-01-19 12:00:00	-5.9	-7.6	-8	-7.9	-7.4	-6.9	-6.4	-6.2	-5.7	-5.2	-5.2	-4.9	-4.5	-3.9	-3.8	-3.5	-3.5	-3.2	-3	-2.8	-2.9	-2.9	-2.9	-2.8	-2.3	-2.5	-2.5	-2.3	-2.2	-2.3	-2.1	-1.9
XZ009	申扎县	2020-01-19 13:00:00	-2.2	-5.1	-6.3	-6.7	-6.7	-6.5	-6.3	-6.1	-5.8	-5.4	-5.4	-5	-4.6	-4	-3.9	-3.6	-3.6	-3.2	-3	-2.8	-2.9	-2.9	-2.9	-2.8	-2.3	-2.5	-2.5	-2.3	-2.2	-2.3	-2.1	-1.9
XZ009	申扎县	2020-01-19 14:00:00	-1.3	-3.4	-4.6	-5.4	-5.6	-5.8	-5.9	-5.9	-5.7	-5.3	-5.3	-5	-4.7	-4.1	-3.9	-3.7	-3.7	-3.3	-3.1	-2.9	-2.9	-2.9	-2.9	-2.8	-2.3	-2.5	-2.4	-2.3	-2.2	-2.3	-2.1	-1.9
XZ009	申扎县	2020-01-19 15:00:00	-0.9	-2.7	-3.8	-4.5	-4.8	-5.1	-5.3	-5.5	-5.4	-5.2	-5.2	-5	-4.7	-4.1	-4	-3.8	-3.7	-3.4	-3.2	-2.9	-2.9	-2.9	-2.9	-2.9	-2.3	-2.5	-2.4	-2.4	-2.2	-2.3	-2.2	-1.9
XZ009	申扎县	2020-01-19 16:00:00	-1.2	-2.4	-3.2	-3.9	-4.2	-4.5	-4.9	-5.1	-5.1	-4.9	-4.9	-4.8	-4.6	-4.2	-4	-3.8	-3.8	-3.4	-3.2	-2.9	-3	-3	-3	-2.9	-2.4	-2.5	-2.5	-2.4	-2.2	-2.3	-2.1	-1.9
XZ009	申扎县	2020-01-19 17:00:00	-2.4	-2.8	-3.2	-3.5	-3.8	-4.1	-4.4	-4.7	-4.8	-4.7	-4.7	-4.6	-4.5	-4.1	-4	-3.8	-3.9	-3.4	-3.2	-3	-3	-3	-3	-2.9	-2.4	-2.5	-2.5	-2.4	-2.2	-2.3	-2.1	-1.9
XZ009	申扎县	2020-01-19 18:00:00	-3.7	-3.4	-3.4	-3.6	-3.7	-3.9	-4.2	-4.5	-4.5	-4.5	-4.5	-4.4	-4.4	-4	-4	-3.8	-3.8	-3.5	-3.3	-3	-3	-3	-3	-2.9	-2.4	-2.5	-2.5	-2.4	-2.2	-2.3	-2.1	-1.9
XZ009	申扎县	2020-01-19 19:00:00	-5.1	-4.2	-3.9	-3.9	-3.7	-3.9	-4	-4.3	-4.4	-4.3	-4.3	-4.3	-4.2	-4	-4	-3.8	-3.8	-3.5	-3.3	-3	-3	-3	-3	-2.9	-2.4	-2.5	-2.5	-2.4	-2.3	-2.3	-2.1	-1.9
XZ009	申扎县	2020-01-19 20:00:00	-6.3	-5	-4.5	-4.3	-4	-4	-4	-4.2	-4.2	-4.2	-4.2	-4.2	-4.1	-3.9	-3.9	-3.7	-3.8	-3.4	-3.3	-3	-3	-3	-3	-2.9	-2.4	-2.5	-2.5	-2.4	-2.3	-2.3	-2.1	-1.9
XZ009	申扎县	2020-01-19 21:00:00	-7	-5.7	-5	-4.7	-4.4	-4.2	-4.2	-4.3	-4.2	-4.1	-4.1	-4.1	-4	-3.8	-3.9	-3.7	-3.8	-3.4	-3.2	-3	-3	-3	-3.1	-2.9	-2.4	-2.6	-2.5	-2.4	-2.3	-2.3	-2.2	-1.9
XZ009	申扎县	2020-01-19 22:00:00	-7.5	-6.2	-5.5	-5.1	-4.6	-4.4	-4.3	-4.4	-4.2	-4.1	-4.1	-4	-4	-3.8	-3.8	-3.7	-3.7	-3.4	-3.2	-3	-3	-3	-3	-3	-2.4	-2.5	-2.5	-2.4	-2.3	-2.4	-2.2	-1.9
XZ009	申扎县	2020-01-19 23:00:00	-8	-6.6	-5.9	-5.5	-4.9	-4.6	-4.5	-4.5	-4.3	-4.2	-4.2	-4	-4	-3.7	-3.7	-3.6	-3.7	-3.4	-3.2	-3	-3	-3	-3	-2.9	-2.5	-2.6	-2.5	-2.4	-2.3	-2.4	-2.2	-1.9
XZ009	申扎县	2020-01-20 00:00:00	-8.4	-7	-6.2	-5.8	-5.2	-4.9	-4.6	-4.6	-4.4	-4.2	-4.2	-4.1	-4	-3.7	-3.7	-3.6	-3.7	-3.4	-3.2	-3	-3	-3	-3	-3	-2.4	-2.6	-2.5	-2.4	-2.3	-2.4	-2.2	-2
XZ009	申扎县	2020-01-20 01:00:00	-9.2	-7.5	-6.6	-6	-5.5	-5.1	-4.8	-4.7	-4.5	-4.3	-4.3	-4.2	-4	-3.7	-3.7	-3.6	-3.7	-3.4	-3.2	-3	-3	-3	-3	-2.9	-2.5	-2.6	-2.5	-2.4	-2.3	-2.4	-2.2	-1.9
XZ009	申扎县	2020-01-20 02:00:00	-9.9	-8.1	-7	-6.5	-5.8	-5.4	-5	-4.9	-4.7	-4.4	-4.4	-4.2	-4	-3.7	-3.7	-3.5	-3.7	-3.4	-3.2	-3	-3	-3	-3	-2.9	-2.4	-2.5	-2.5	-2.4	-2.3	-2.4	-2.2	-2
XZ009	申扎县	2020-01-20 03:00:00	-10.2	-8.5	-7.5	-6.9	-6.1	-5.6	-5.2	-5	-4.9	-4.5	-4.5	-4.4	-4.1	-3.8	-3.7	-3.6	-3.7	-3.4	-3.2	-3	-3	-3	-3	-2.9	-2.4	-2.6	-2.5	-2.4	-2.3	-2.4	-2.2	-2
XZ009	申扎县	2020-01-20 04:00:00	-10.6	-8.9	-7.9	-7.2	-6.4	-5.9	-5.5	-5.3	-5	-4.6	-4.6	-4.4	-4.2	-3.9	-3.7	-3.6	-3.7	-3.4	-3.2	-3	-3	-3	-3	-2.9	-2.4	-2.6	-2.5	-2.4	-2.3	-2.4	-2.2	-2
XZ009	申扎县	2020-01-20 05:00:00	-10.6	-9	-8.1	-7.5	-6.7	-6.1	-5.7	-5.5	-5.2	-4.8	-4.8	-4.5	-4.3	-3.9	-3.8	-3.6	-3.7	-3.4	-3.2	-3	-3	-3	-3	-2.9	-2.4	-2.5	-2.5	-2.4	-2.3	-2.4	-2.2	-2
XZ009	申扎县	2020-01-20 06:00:00	-11	-9.4	-8.4	-7.7	-6.9	-6.4	-5.9	-5.7	-5.3	-4.9	-4.9	-4.7	-4.4	-3.9	-3.9	-3.7	-3.7	-3.4	-3.2	-3	-3	-3	-3	-2.9	-2.4	-2.6	-2.5	-2.4	-2.3	-2.4	-2.2	-2
XZ009	申扎县	2020-01-20 07:00:00	-11.7	-9.7	-8.7	-8	-7.2	-6.5	-6.1	-5.8	-5.5	-5	-5	-4.8	-4.5	-4	-3.9	-3.7	-3.7	-3.4	-3.2	-3	-3	-3	-3	-2.9	-2.4	-2.6	-2.5	-2.4	-2.3	-2.4	-2.2	-2
XZ009	申扎县	2020-01-20 08:00:00	-12.7	-10.4	-9.2	-8.4	-7.5	-6.8	-6.3	-6	-5.6	-5.2	-5.2	-4.9	-4.6	-4	-4	-3.7	-3.7	-3.4	-3.2	-3	-3	-3	-3	-2.9	-2.4	-2.6	-2.5	-2.4	-2.3	-2.4	-2.2	-2
XZ009	申扎县	2020-01-20 09:00:00	-13.4	-11	-9.7	-8.9	-7.9	-7.1	-6.5	-6.2	-5.8	-5.4	-5.4	-5	-4.7	-4.1	-4	-3.8	-3.8	-3.4	-3.3	-3	-3	-3	-3	-3	-2.4	-2.6	-2.5	-2.4	-2.3	-2.4	-2.2	-2
XZ009	申扎县	2020-01-20 10:00:00	-13.5	-11.5	-10.2	-9.3	-8.2	-7.4	-6.9	-6.5	-6	-5.5	-5.5	-5.2	-4.8	-4.2	-4.1	-3.9	-3.9	-3.5	-3.3	-3	-3	-3.1	-3.1	-3	-2.5	-2.6	-2.6	-2.4	-2.3	-2.4	-2.2	-2
XZ009	申扎县	2020-01-20 11:00:00	-11.5	-10.9	-10.2	-9.5	-8.5	-7.7	-7	-6.7	-6.2	-5.7	-5.7	-5.4	-5	-4.3	-4.2	-3.9	-3.9	-3.5	-3.4	-3.1	-3.1	-3.1	-3.1	-3	-2.4	-2.6	-2.5	-2.4	-2.3	-2.4	-2.2	-2
XZ009	申扎县	2020-01-20 12:00:00	-8.9	-9.5	-9.4	-9	-8.4	-7.7	-7.2	-6.9	-6.4	-5.9	-5.9	-5.5	-5.1	-4.4	-4.2	-4	-4	-3.6	-3.4	-3.1	-3.2	-3.1	-3.1	-3	-2.5	-2.6	-2.5	-2.4	-2.3	-2.4	-2.2	-2
XZ009	申扎县	2020-01-20 13:00:00	-6.4	-7.7	-8.2	-8.2	-7.9	-7.5	-7.2	-6.9	-6.5	-6	-6	-5.6	-5.2	-4.5	-4.4	-4.1	-4	-3.7	-3.4	-3.2	-3.2	-3.2	-3.2	-3	-2.5	-2.6	-2.6	-2.4	-2.4	-2.4	-2.2	-2
XZ009	申扎县	2020-01-20 14:00:00	-4.5	-6.1	-6.9	-7.2	-7.1	-7	-6.9	-6.7	-6.4	-6	-6	-5.7	-5.3	-4.6	-4.4	-4.2	-4.1	-3.7	-3.5	-3.2	-3.2	-3.2	-3.2	-3	-2.5	-2.6	-2.6	-2.4	-2.4	-2.4	-2.2	-2
XZ009	申扎县	2020-01-20 15:00:00	-3	-4.9	-5.7	-6.2	-6.3	-6.4	-6.5	-6.5	-6.3	-5.9	-5.9	-5.7	-5.4	-4.7	-4.5	-4.2	-4.2	-3.8	-3.5	-3.2	-3.2	-3.2	-3.2	-3	-2.5	-2.7	-2.6	-2.5	-2.4	-2.4	-2.2	-2
XZ009	申扎县	2020-01-20 16:00:00	-2	-3.8	-4.7	-5.3	-5.5	-5.8	-6	-6.1	-6	-5.8	-5.8	-5.5	-5.3	-4.7	-4.5	-4.3	-4.2	-3.9	-3.6	-3.3	-3.3	-3.2	-3.2	-3.1	-2.5	-2.7	-2.7	-2.5	-2.4	-2.4	-2.2	-2
XZ009	申扎县	2020-01-20 17:00:00	-1.5	-3	-4	-4.6	-4.9	-5.2	-5.5	-5.7	-5.7	-5.5	-5.5	-5.4	-5.2	-4.7	-4.5	-4.3	-4.2	-3.9	-3.6	-3.4	-3.4	-3.3	-3.3	-3.1	-2.5	-2.7	-2.7	-2.5	-2.4	-2.4	-2.2	-2
XZ009	申扎县	2020-01-20 18:00:00	-1.9	-2.8	-3.5	-4	-4.4	-4.7	-5	-5.4	-5.4	-5.3	-5.3	-5.2	-5	-4.7	-4.5	-4.3	-4.3	-3.9	-3.7	-3.4	-3.4	-3.3	-3.3	-3.2	-2.6	-2.7	-2.7	-2.5	-2.4	-2.4	-2.2	-2
XZ009	申扎县	2020-01-20 19:00:00	-3.6	-3.4	-3.6	-3.9	-4	-4.4	-4.7	-5	-5.1	-5	-5	-5	-4.9	-4.6	-4.5	-4.3	-4.3	-3.9	-3.7	-3.4	-3.4	-3.4	-3.3	-3.2	-2.6	-2.7	-2.7	-2.5	-2.4	-2.4	-2.2	-2
XZ009	申扎县	2020-01-20 20:00:00	-5.7	-4.6	-4.2	-4.2	-4.1	-4.2	-4.5	-4.8	-4.9	-4.9	-4.9	-4.8	-4.7	-4.5	-4.4	-4.2	-4.2	-3.9	-3.7	-3.4	-3.4	-3.4	-3.4	-3.2	-2.7	-2.8	-2.7	-2.5	-2.4	-2.5	-2.3	-2
XZ009	申扎县	2020-01-20 21:00:00	-7.1	-5.7	-5	-4.7	-4.4	-4.4	-4.5	-4.7	-4.7	-4.7	-4.7	-4.7	-4.6	-4.4	-4.4	-4.2	-4.2	-3.9	-3.7	-3.4	-3.4	-3.4	-3.4	-3.2	-2.7	-2.8	-2.7	-2.5	-2.4	-2.5	-2.2	-2
XZ009	申扎县	2020-01-20 22:00:00	-8.4	-6.7	-5.8	-5.4	-4.9	-4.7	-4.6	-4.7	-4.7	-4.6	-4.6	-4.5	-4.5	-4.3	-4.3	-4.1	-4.2	-3.8	-3.7	-3.4	-3.4	-3.4	-3.4	-3.2	-2.7	-2.8	-2.7	-2.5	-2.4	-2.5	-2.3	-2
XZ009	申扎县	2020-01-20 23:00:00	-9.4	-7.5	-6.5	-5.9	-5.3	-5	-4.9	-4.9	-4.7	-4.6	-4.6	-4.5	-4.4	-4.2	-4.2	-4	-4.1	-3.8	-3.6	-3.4	-3.4	-3.4	-3.4	-3.2	-2.7	-2.8	-2.8	-2.6	-2.5	-2.5	-2.3	-2.1
XZ009	申扎县	2020-01-21 00:00:00	-9.5	-7.9	-7	-6.4	-5.8	-5.4	-5.1	-5	-4.9	-4.7	-4.7	-4.5	-4.4	-4.2	-4.2	-4	-4.1	-3.7	-3.6	-3.4	-3.4	-3.4	-3.4	-3.2	-2.7	-2.9	-2.8	-2.6	-2.5	-2.5	-2.4	-2
XZ009	申扎县	2020-01-21 01:00:00	-9.7	-8.2	-7.4	-6.8	-6.1	-5.6	-5.4	-5.2	-5	-4.8	-4.8	-4.6	-4.5	-4.2	-4.2	-4	-4	-3.7	-3.5	-3.4	-3.4	-3.4	-3.4	-3.2	-2.7	-2.8	-2.8	-2.6	-2.5	-2.5	-2.4	-2.1
XZ009	申扎县	2020-01-21 02:00:00	-10.1	-8.5	-7.6	-7.1	-6.4	-5.9	-5.5	-5.4	-5.2	-4.9	-4.9	-4.7	-4.5	-4.2	-4.1	-4	-4	-3.7	-3.5	-3.4	-3.4	-3.4	-3.4	-3.2	-2.7	-2.8	-2.8	-2.6	-2.5	-2.5	-2.4	-2.1
XZ009	申扎县	2020-01-21 03:00:00	-10.7	-9	-8	-7.4	-6.6	-6.1	-5.7	-5.6	-5.3	-5	-5	-4.8	-4.5	-4.2	-4.2	-4	-4	-3.7	-3.5	-3.3	-3.4	-3.4	-3.4	-3.2	-2.7	-2.9	-2.8	-2.6	-2.5	-2.5	-2.4	-2.1
XZ009	申扎县	2020-01-21 04:00:00	-10.8	-9.3	-8.4	-7.7	-6.9	-6.4	-6	-5.7	-5.4	-5.1	-5.1	-4.9	-4.7	-4.2	-4.2	-4	-4	-3.7	-3.5	-3.3	-3.4	-3.4	-3.4	-3.2	-2.7	-2.8	-2.8	-2.6	-2.5	-2.5	-2.4	-2.1
XZ009	申扎县	2020-01-21 05:00:00	-10.5	-9.3	-8.5	-7.9	-7.2	-6.5	-6.2	-5.9	-5.6	-5.2	-5.2	-5	-4.7	-4.3	-4.2	-4	-4	-3.7	-3.5	-3.3	-3.4	-3.4	-3.4	-3.2	-2.7	-2.9	-2.8	-2.6	-2.5	-2.5	-2.4	-2.1
XZ009	申扎县	2020-01-21 06:00:00	-10.8	-9.4	-8.6	-8.1	-7.3	-6.7	-6.3	-6.1	-5.7	-5.4	-5.4	-5.1	-4.8	-4.4	-4.3	-4	-4.1	-3.7	-3.5	-3.3	-3.4	-3.4	-3.4	-3.2	-2.7	-2.8	-2.8	-2.6	-2.5	-2.5	-2.4	-2.1
XZ009	申扎县	2020-01-21 07:00:00	-11	-9.7	-8.9	-8.3	-7.5	-6.9	-6.5	-6.2	-5.9	-5.5	-5.5	-5.2	-4.9	-4.4	-4.3	-4.1	-4.1	-3.8	-3.5	-3.3	-3.4	-3.4	-3.4	-3.2	-2.7	-2.9	-2.8	-2.6	-2.5	-2.5	-2.4	-2.1
XZ009	申扎县	2020-01-21 08:00:00	-11.2	-9.9	-9	-8.5	-7.7	-7	-6.6	-6.4	-6	-5.6	-5.6	-5.3	-5	-4.5	-4.4	-4.1	-4.2	-3.8	-3.6	-3.4	-3.4	-3.4	-3.4	-3.2	-2.7	-2.8	-2.8	-2.6	-2.5	-2.5	-2.4	-2.1
XZ009	申扎县	2020-01-21 09:00:00	-11.7	-10.2	-9.3	-8.7	-7.9	-7.2	-6.8	-6.5	-6.2	-5.7	-5.7	-5.4	-5.1	-4.5	-4.4	-4.2	-4.2	-3.8	-3.6	-3.4	-3.4	-3.4	-3.4	-3.2	-2.7	-2.8	-2.8	-2.6	-2.5	-2.5	-2.4	-2.1
XZ009	申扎县	2020-01-21 10:00:00	-12.4	-10.7	-9.7	-9	-8.1	-7.4	-7	-6.7	-6.3	-5.9	-5.9	-5.5	-5.2	-4.6	-4.5	-4.2	-4.2	-3.9	-3.7	-3.4	-3.4	-3.4	-3.4	-3.2	-2.7	-2.9	-2.8	-2.7	-2.5	-2.5	-2.4	-2.1
XZ009	申扎县	2020-01-21 11:00:00	-10.1	-10	-9.6	-9.1	-8.3	-7.6	-7.2	-6.9	-6.4	-6	-6	-5.7	-5.3	-4.7	-4.5	-4.3	-4.2	-3.9	-3.7	-3.4	-3.4	-3.4	-3.4	-3.3	-2.7	-2.9	-2.8	-2.6	-2.5	-2.5	-2.4	-2.1
XZ009	申扎县	2020-01-21 12:00:00	-7.5	-8.5	-8.7	-8.6	-8.1	-7.6	-7.2	-7	-6.5	-6.1	-6.1	-5.8	-5.4	-4.7	-4.6	-4.4	-4.3	-3.9	-3.7	-3.5	-3.4	-3.4	-3.4	-3.2	-2.7	-2.9	-2.8	-2.7	-2.5	-2.5	-2.4	-2.2
XZ009	申扎县	2020-01-21 13:00:00	-6.3	-7.3	-7.7	-7.9	-7.5	-7.3	-7.1	-6.9	-6.6	-6.2	-6.2	-5.9	-5.5	-4.8	-4.7	-4.4	-4.4	-4	-3.7	-3.5	-3.5	-3.5	-3.4	-3.3	-2.7	-2.9	-2.9	-2.7	-2.5	-2.6	-2.4	-2.1
XZ009	申扎县	2020-01-21 14:00:00	-3.8	-5.8	-6.7	-7	-7	-6.9	-6.8	-6.8	-6.5	-6.2	-6.2	-5.9	-5.5	-4.9	-4.7	-4.5	-4.4	-4	-3.8	-3.5	-3.5	-3.5	-3.4	-3.3	-2.8	-2.9	-2.9	-2.7	-2.5	-2.6	-2.4	-2.2
XZ009	申扎县	2020-01-21 15:00:00	-4.2	-5.2	-5.7	-6.2	-6.2	-6.4	-6.5	-6.5	-6.3	-6	-6	-5.8	-5.5	-4.9	-4.7	-4.5	-4.5	-4	-3.8	-3.5	-3.5	-3.5	-3.5	-3.3	-2.8	-2.9	-2.9	-2.7	-2.5	-2.6	-2.4	-2.2
XZ009	申扎县	2020-01-21 16:00:00	-3.6	-4.6	-5.2	-5.7	-5.8	-5.9	-6	-6.2	-6.1	-5.9	-5.9	-5.7	-5.4	-4.9	-4.8	-4.5	-4.5	-4.1	-3.9	-3.6	-3.6	-3.5	-3.5	-3.4	-2.8	-2.9	-2.9	-2.7	-2.5	-2.6	-2.4	-2.2
XZ009	申扎县	2020-01-21 17:00:00	-3.8	-4.5	-5	-5.3	-5.4	-5.5	-5.7	-5.9	-5.9	-5.7	-5.7	-5.5	-5.4	-4.9	-4.8	-4.5	-4.5	-4.2	-3.9	-3.7	-3.6	-3.5	-3.5	-3.4	-2.8	-2.9	-2.9	-2.7	-2.5	-2.6	-2.4	-2.2
XZ009	申扎县	2020-01-21 18:00:00	-4.2	-4.5	-4.9	-5.1	-5.1	-5.3	-5.5	-5.7	-5.7	-5.5	-5.5	-5.4	-5.2	-4.9	-4.7	-4.5	-4.5	-4.2	-3.9	-3.7	-3.6	-3.5	-3.5	-3.4	-2.9	-2.9	-2.9	-2.7	-2.6	-2.6	-2.4	-2.2
XZ009	申扎县	2020-01-21 19:00:00	-4.9	-4.9	-4.9	-5	-5	-5.1	-5.3	-5.5	-5.5	-5.4	-5.4	-5.3	-5.2	-4.8	-4.7	-4.5	-4.5	-4.2	-3.9	-3.7	-3.7	-3.6	-3.5	-3.4	-2.9	-3	-2.9	-2.7	-2.6	-2.6	-2.5	-2.2
XZ009	申扎县	2020-01-21 20:00:00	-6	-5.5	-5.2	-5.2	-5	-5	-5.2	-5.4	-5.3	-5.2	-5.2	-5.2	-5	-4.7	-4.7	-4.5	-4.5	-4.1	-3.9	-3.7	-3.7	-3.6	-3.6	-3.4	-2.9	-3	-2.9	-2.7	-2.6	-2.7	-2.5	-2.2
XZ009	申扎县	2020-01-21 21:00:00	-7.2	-6.2	-5.7	-5.5	-5.2	-5.1	-5.2	-5.3	-5.2	-5.1	-5.1	-5	-4.9	-4.7	-4.6	-4.4	-4.5	-4.1	-3.9	-3.7	-3.7	-3.6	-3.6	-3.4	-2.9	-3	-2.9	-2.7	-2.6	-2.7	-2.5	-2.2
XZ009	申扎县	2020-01-21 22:00:00	-8.6	-7	-6.4	-6	-5.5	-5.3	-5.2	-5.3	-5.2	-5	-5	-5	-4.9	-4.6	-4.5	-4.4	-4.4	-4	-3.9	-3.6	-3.7	-3.7	-3.6	-3.4	-2.9	-3	-3	-2.8	-2.7	-2.7	-2.5	-2.2
XZ009	申扎县	2020-01-21 23:00:00	-9.3	-7.8	-7	-6.5	-5.9	-5.5	-5.4	-5.4	-5.2	-5.1	-5.1	-5	-4.9	-4.5	-4.5	-4.4	-4.4	-4	-3.9	-3.6	-3.6	-3.6	-3.6	-3.5	-2.9	-3	-3	-2.8	-2.7	-2.7	-2.5	-2.2
XZ009	申扎县	2020-01-22 00:00:00	-9.5	-8.2	-7.4	-6.9	-6.2	-5.9	-5.6	-5.5	-5.4	-5.1	-5.1	-5	-4.8	-4.5	-4.5	-4.3	-4.4	-4	-3.9	-3.6	-3.6	-3.6	-3.6	-3.5	-2.9	-3	-3	-2.8	-2.7	-2.7	-2.5	-2.2
XZ009	申扎县	2020-01-22 01:00:00	-10.4	-8.7	-7.8	-7.3	-6.5	-6.1	-5.8	-5.7	-5.5	-5.2	-5.2	-5	-4.9	-4.5	-4.5	-4.3	-4.4	-4	-3.9	-3.5	-3.6	-3.6	-3.6	-3.4	-2.9	-3	-3	-2.8	-2.7	-2.7	-2.5	-2.2
XZ009	申扎县	2020-01-22 02:00:00	-10.5	-9.2	-8.2	-7.7	-6.9	-6.4	-6	-5.9	-5.6	-5.3	-5.3	-5.1	-4.9	-4.5	-4.5	-4.3	-4.4	-4	-3.8	-3.6	-3.6	-3.6	-3.6	-3.4	-2.9	-3	-3	-2.8	-2.7	-2.7	-2.5	-2.3
XZ009	申扎县	2020-01-22 03:00:00	-10.3	-9.1	-8.4	-7.9	-7.1	-6.6	-6.2	-6	-5.7	-5.4	-5.4	-5.2	-5	-4.5	-4.5	-4.3	-4.4	-4	-3.9	-3.6	-3.6	-3.6	-3.6	-3.4	-2.9	-3	-3	-2.8	-2.7	-2.7	-2.5	-2.3
XZ009	申扎县	2020-01-22 04:00:00	-10.6	-9.3	-8.5	-8	-7.3	-6.7	-6.4	-6.2	-5.9	-5.5	-5.5	-5.3	-5	-4.6	-4.5	-4.3	-4.4	-4	-3.8	-3.6	-3.6	-3.6	-3.6	-3.4	-2.9	-3	-3	-2.8	-2.7	-2.7	-2.5	-2.3
XZ009	申扎县	2020-01-22 05:00:00	-10.5	-9.5	-8.7	-8.2	-7.5	-6.9	-6.5	-6.4	-6	-5.7	-5.7	-5.4	-5.1	-4.7	-4.5	-4.4	-4.4	-4	-3.9	-3.6	-3.6	-3.6	-3.6	-3.4	-2.9	-3	-3	-2.8	-2.7	-2.7	-2.5	-2.3
XZ009	申扎县	2020-01-22 06:00:00	-10.7	-9.5	-8.9	-8.4	-7.6	-7	-6.7	-6.5	-6.1	-5.7	-5.7	-5.5	-5.2	-4.7	-4.6	-4.4	-4.4	-4	-3.8	-3.6	-3.6	-3.6	-3.6	-3.4	-2.9	-3	-3	-2.8	-2.7	-2.7	-2.5	-2.3
XZ009	申扎县	2020-01-22 07:00:00	-11.1	-9.9	-9	-8.5	-7.8	-7.2	-6.9	-6.6	-6.3	-5.9	-5.9	-5.6	-5.3	-4.7	-4.7	-4.4	-4.4	-4	-3.9	-3.6	-3.6	-3.6	-3.6	-3.4	-2.9	-3	-3	-2.8	-2.7	-2.7	-2.5	-2.3
XZ009	申扎县	2020-01-22 21:00:00	-7.5	-6	-5.3	-5	-4.8	-4.8	-4.9	-5.1	-5.2	-5.1	-5.1	-5.1	-5	-4.9	-4.9	-4.7	-4.7	-4.4	-4.2	-3.9	-3.9	-3.9	-3.9	-3.7	-3.1	-3.2	-3.2	-3	-2.8	-2.9	-2.7	-2.4
XZ009	申扎县	2020-01-22 22:00:00	-9.3	-7.3	-6.2	-5.7	-5.2	-5	-5	-5.2	-5.1	-5	-5	-5	-5	-4.8	-4.7	-4.6	-4.7	-4.3	-4.2	-3.9	-3.9	-3.9	-3.9	-3.7	-3.2	-3.2	-3.2	-3	-2.8	-2.9	-2.7	-2.4
XZ009	申扎县	2020-01-22 23:00:00	-10.5	-8.3	-7.1	-6.5	-5.8	-5.4	-5.3	-5.3	-5.2	-5	-5	-5	-4.9	-4.7	-4.7	-4.5	-4.6	-4.3	-4.1	-3.9	-3.9	-3.9	-3.8	-3.7	-3.1	-3.2	-3.2	-3	-2.9	-2.9	-2.7	-2.4
XZ009	申扎县	2020-01-23 00:00:00	-10.9	-8.9	-7.9	-7.2	-6.4	-5.9	-5.6	-5.5	-5.3	-5.1	-5.1	-5	-4.9	-4.6	-4.6	-4.5	-4.5	-4.2	-4	-3.8	-3.9	-3.9	-3.8	-3.7	-3.1	-3.2	-3.2	-3	-2.9	-2.9	-2.7	-2.4
XZ009	申扎县	2020-01-23 01:00:00	-11.1	-9.4	-8.3	-7.6	-6.8	-6.2	-5.9	-5.7	-5.5	-5.2	-5.2	-5	-4.9	-4.6	-4.6	-4.5	-4.5	-4.2	-4	-3.8	-3.9	-3.8	-3.8	-3.7	-3.1	-3.2	-3.2	-3	-2.9	-2.9	-2.7	-2.4
XZ009	申扎县	2020-01-23 02:00:00	-11.1	-9.6	-8.7	-8	-7.2	-6.6	-6.2	-6	-5.7	-5.4	-5.4	-5.2	-5	-4.6	-4.6	-4.5	-4.5	-4.2	-4	-3.8	-3.8	-3.8	-3.8	-3.7	-3.1	-3.2	-3.2	-3	-2.9	-2.9	-2.7	-2.4
XZ009	申扎县	2020-01-23 03:00:00	-11.7	-10	-9	-8.3	-7.5	-6.9	-6.4	-6.2	-5.9	-5.5	-5.5	-5.3	-5	-4.7	-4.6	-4.5	-4.5	-4.2	-4	-3.8	-3.8	-3.8	-3.8	-3.6	-3.1	-3.2	-3.2	-3	-2.9	-2.9	-2.7	-2.4
XZ009	申扎县	2020-01-23 04:00:00	-12.4	-10.5	-9.4	-8.7	-7.8	-7.1	-6.7	-6.4	-6.1	-5.7	-5.7	-5.4	-5.2	-4.7	-4.7	-4.5	-4.5	-4.2	-4	-3.7	-3.8	-3.8	-3.8	-3.7	-3.1	-3.2	-3.2	-3	-2.9	-2.9	-2.7	-2.4
XZ009	申扎县	2020-01-23 05:00:00	-12.8	-11	-9.9	-9	-8.1	-7.4	-6.9	-6.7	-6.3	-5.9	-5.9	-5.5	-5.3	-4.8	-4.7	-4.5	-4.5	-4.2	-4	-3.7	-3.8	-3.8	-3.7	-3.6	-3.1	-3.2	-3.2	-3	-2.9	-2.9	-2.7	-2.4
XZ009	申扎县	2020-01-23 06:00:00	-12.9	-11.2	-10.1	-9.4	-8.4	-7.7	-7.1	-6.9	-6.5	-6	-6	-5.7	-5.4	-4.9	-4.7	-4.5	-4.5	-4.2	-4	-3.7	-3.8	-3.8	-3.7	-3.6	-3.1	-3.2	-3.2	-3	-2.9	-2.9	-2.7	-2.4
XZ009	申扎县	2020-01-23 07:00:00	-13.1	-11.5	-10.4	-9.7	-8.7	-8	-7.4	-7.1	-6.7	-6.2	-6.2	-5.9	-5.5	-4.9	-4.8	-4.6	-4.6	-4.2	-4	-3.7	-3.8	-3.8	-3.8	-3.6	-3	-3.2	-3.2	-3	-2.9	-2.9	-2.7	-2.4
XZ009	申扎县	2020-01-23 08:00:00	-13.4	-11.7	-10.7	-9.9	-8.9	-8.2	-7.7	-7.3	-6.9	-6.4	-6.4	-6	-5.7	-5	-4.9	-4.6	-4.7	-4.2	-4	-3.8	-3.8	-3.8	-3.8	-3.6	-3.1	-3.2	-3.2	-3	-2.9	-2.9	-2.7	-2.4
XZ009	申扎县	2020-01-23 09:00:00	-14.1	-12.2	-11	-10.2	-9.2	-8.4	-7.8	-7.5	-7	-6.5	-6.5	-6.2	-5.8	-5.2	-5	-4.7	-4.7	-4.3	-4.1	-3.8	-3.9	-3.8	-3.8	-3.6	-3.1	-3.2	-3.2	-3	-2.9	-2.9	-2.7	-2.4
XZ009	申扎县	2020-01-23 10:00:00	-13.9	-12.4	-11.3	-10.5	-9.5	-8.7	-8	-7.7	-7.2	-6.7	-6.7	-6.4	-5.9	-5.2	-5	-4.8	-4.7	-4.4	-4.1	-3.8	-3.8	-3.8	-3.8	-3.6	-3.1	-3.2	-3.2	-3	-2.9	-2.9	-2.7	-2.4
XZ009	申扎县	2020-01-23 11:00:00	-11	-11.2	-10.9	-10.5	-9.5	-8.8	-8.2	-7.9	-7.4	-6.9	-6.9	-6.5	-6	-5.3	-5.1	-4.9	-4.8	-4.4	-4.2	-3.9	-3.9	-3.9	-3.8	-3.7	-3.1	-3.2	-3.2	-3	-2.9	-2.9	-2.7	-2.4
XZ009	申扎县	2020-01-23 12:00:00	-8.9	-9.8	-10	-9.9	-9.2	-8.7	-8.3	-8	-7.5	-7	-7	-6.6	-6.2	-5.4	-5.2	-4.9	-4.9	-4.5	-4.2	-3.9	-3.9	-3.9	-3.9	-3.7	-3.1	-3.2	-3.2	-3	-2.9	-2.9	-2.7	-2.5
XZ009	申扎县	2020-01-23 13:00:00	-6.4	-7.9	-8.6	-8.9	-8.7	-8.4	-8.1	-7.9	-7.5	-7	-7	-6.7	-6.3	-5.5	-5.3	-5	-4.9	-4.5	-4.3	-4	-3.9	-3.9	-3.9	-3.7	-3.2	-3.3	-3.2	-3	-2.9	-2.9	-2.7	-2.4
XZ009	申扎县	2020-01-23 14:00:00	-6.3	-7.2	-7.7	-7.9	-7.9	-7.9	-7.8	-7.7	-7.4	-7	-7	-6.7	-6.4	-5.6	-5.4	-5.1	-5	-4.6	-4.3	-4	-4	-3.9	-3.9	-3.7	-3.2	-3.2	-3.2	-3	-2.9	-2.9	-2.7	-2.5
XZ009	申扎县	2020-01-23 15:00:00	-5.7	-6.6	-7.1	-7.4	-7.4	-7.4	-7.4	-7.4	-7.2	-6.9	-6.9	-6.6	-6.3	-5.7	-5.4	-5.2	-5.1	-4.6	-4.4	-4	-4	-4	-3.9	-3.7	-3.2	-3.3	-3.2	-3	-2.9	-2.9	-2.7	-2.5
XZ009	申扎县	2020-01-23 16:00:00	-5	-5.9	-6.5	-6.8	-6.9	-7	-7	-7.2	-7	-6.7	-6.7	-6.5	-6.2	-5.6	-5.5	-5.2	-5.1	-4.7	-4.4	-4.1	-4.1	-4	-4	-3.8	-3.2	-3.3	-3.2	-3	-2.9	-2.9	-2.7	-2.5
XZ009	申扎县	2020-01-23 17:00:00	-5	-5.6	-6	-6.4	-6.4	-6.6	-6.7	-6.9	-6.8	-6.6	-6.6	-6.4	-6.2	-5.6	-5.5	-5.2	-5.1	-4.7	-4.4	-4.2	-4.1	-4	-4	-3.8	-3.2	-3.4	-3.3	-3	-2.9	-2.9	-2.7	-2.5
XZ009	申扎县	2020-01-23 18:00:00	-5.5	-5.7	-5.9	-6.1	-6.1	-6.2	-6.4	-6.6	-6.5	-6.4	-6.4	-6.2	-6	-5.5	-5.4	-5.2	-5.2	-4.7	-4.5	-4.2	-4.2	-4.1	-4	-3.9	-3.3	-3.4	-3.3	-3.1	-2.9	-3	-2.7	-2.5
XZ009	申扎县	2020-01-23 19:00:00	-6.8	-6.2	-6	-6.1	-6	-6	-6.2	-6.4	-6.4	-6.2	-6.2	-6.1	-5.9	-5.5	-5.4	-5.2	-5.2	-4.7	-4.5	-4.2	-4.2	-4.1	-4	-3.9	-3.3	-3.4	-3.3	-3.1	-2.9	-3	-2.8	-2.5
XZ009	申扎县	2020-01-23 20:00:00	-8.2	-7	-6.5	-6.4	-6.1	-6	-6.1	-6.2	-6.2	-6	-6	-6	-5.8	-5.4	-5.4	-5.1	-5.1	-4.7	-4.5	-4.2	-4.2	-4.1	-4	-3.9	-3.3	-3.4	-3.3	-3.1	-3	-3	-2.8	-2.5
XZ009	申扎县	2020-01-23 21:00:00	-9.6	-8	-7.3	-6.9	-6.4	-6.2	-6.1	-6.2	-6.1	-5.9	-5.9	-5.9	-5.7	-5.4	-5.3	-5.1	-5.1	-4.7	-4.5	-4.2	-4.2	-4.2	-4.1	-3.9	-3.3	-3.4	-3.4	-3.1	-3	-3	-2.8	-2.5
XZ009	申扎县	2020-01-23 22:00:00	-10.5	-8.8	-7.9	-7.4	-6.8	-6.4	-6.3	-6.3	-6.1	-5.9	-5.9	-5.8	-5.7	-5.3	-5.2	-5	-5	-4.7	-4.5	-4.2	-4.2	-4.2	-4.1	-3.9	-3.4	-3.4	-3.4	-3.2	-3	-3	-2.8	-2.5
XZ009	申扎县	2020-01-23 23:00:00	-11.2	-9.5	-8.5	-7.9	-7.2	-6.7	-6.4	-6.4	-6.2	-6	-6	-5.8	-5.6	-5.2	-5.2	-5	-5	-4.7	-4.4	-4.2	-4.2	-4.1	-4.1	-3.9	-3.4	-3.4	-3.4	-3.2	-3	-3	-2.8	-2.5
XZ009	申扎县	2020-01-24 00:00:00	-11.8	-10	-9	-8.3	-7.5	-7	-6.7	-6.5	-6.3	-6	-6	-5.9	-5.7	-5.3	-5.2	-5	-5	-4.7	-4.4	-4.2	-4.2	-4.1	-4.1	-3.9	-3.4	-3.4	-3.4	-3.2	-3	-3	-2.8	-2.5
XZ009	申扎县	2020-01-24 01:00:00	-13	-10.8	-9.5	-8.8	-7.9	-7.3	-6.9	-6.7	-6.5	-6.1	-6.1	-5.9	-5.7	-5.2	-5.2	-5	-5	-4.6	-4.4	-4.2	-4.2	-4.1	-4.1	-3.9	-3.4	-3.4	-3.4	-3.2	-3	-3	-2.9	-2.5
XZ009	申扎县	2020-01-24 02:00:00	-13.6	-11.4	-10.1	-9.3	-8.3	-7.7	-7.2	-6.9	-6.6	-6.2	-6.2	-6	-5.7	-5.3	-5.2	-5	-5	-4.6	-4.4	-4.1	-4.2	-4.1	-4.1	-3.9	-3.4	-3.5	-3.4	-3.2	-3	-3	-2.9	-2.5
XZ009	申扎县	2020-01-24 03:00:00	-13.6	-11.8	-10.5	-9.7	-8.7	-8	-7.5	-7.2	-6.8	-6.4	-6.4	-6.1	-5.8	-5.4	-5.2	-5	-5	-4.6	-4.4	-4.2	-4.2	-4.1	-4	-3.9	-3.4	-3.4	-3.4	-3.2	-3	-3	-2.9	-2.6
XZ009	申扎县	2020-01-24 04:00:00	-13.4	-11.7	-10.7	-10	-9	-8.2	-7.7	-7.4	-7	-6.5	-6.5	-6.2	-5.9	-5.4	-5.2	-5	-5	-4.7	-4.4	-4.2	-4.2	-4.1	-4.1	-3.9	-3.4	-3.5	-3.4	-3.2	-3	-3	-2.9	-2.6
XZ009	申扎县	2020-01-24 05:00:00	-13.7	-12	-10.9	-10.2	-9.2	-8.5	-7.9	-7.6	-7.2	-6.7	-6.7	-6.4	-6	-5.4	-5.3	-5	-5	-4.7	-4.4	-4.2	-4.2	-4.1	-4.1	-3.9	-3.4	-3.5	-3.4	-3.2	-3	-3	-2.9	-2.6
XZ009	申扎县	2020-01-24 06:00:00	-13.5	-12	-11.1	-10.4	-9.4	-8.7	-8.1	-7.8	-7.4	-6.9	-6.9	-6.5	-6.2	-5.5	-5.4	-5.1	-5.1	-4.7	-4.4	-4.2	-4.2	-4.1	-4.1	-3.9	-3.4	-3.5	-3.4	-3.2	-3	-3.1	-2.9	-2.6
XZ009	申扎县	2020-01-24 07:00:00	-13.8	-12.2	-11.2	-10.5	-9.5	-8.8	-8.3	-8	-7.5	-7	-7	-6.7	-6.3	-5.6	-5.4	-5.2	-5.1	-4.7	-4.5	-4.2	-4.2	-4.2	-4.1	-3.9	-3.4	-3.5	-3.4	-3.2	-3	-3.1	-2.9	-2.6
XZ009	申扎县	2020-01-24 08:00:00	-14.2	-12.5	-11.5	-10.7	-9.7	-9	-8.4	-8.1	-7.7	-7.2	-7.2	-6.8	-6.4	-5.7	-5.5	-5.2	-5.2	-4.8	-4.5	-4.2	-4.2	-4.2	-4.1	-3.9	-3.4	-3.5	-3.4	-3.2	-3	-3.1	-2.9	-2.6
XZ009	申扎县	2020-01-24 09:00:00	-14.9	-12.9	-11.7	-10.9	-9.9	-9.2	-8.6	-8.3	-7.7	-7.3	-7.3	-6.9	-6.5	-5.8	-5.6	-5.3	-5.2	-4.8	-4.5	-4.2	-4.2	-4.2	-4.1	-4	-3.4	-3.5	-3.4	-3.2	-3.1	-3.1	-2.9	-2.6
XZ009	申扎县	2020-01-24 10:00:00	-15	-13.4	-12.2	-11.3	-10.2	-9.4	-8.8	-8.4	-7.9	-7.4	-7.4	-7	-6.6	-5.9	-5.7	-5.4	-5.3	-4.9	-4.6	-4.3	-4.3	-4.2	-4.2	-4	-3.4	-3.5	-3.4	-3.2	-3.1	-3.1	-2.9	-2.6
XZ009	申扎县	2020-01-24 11:00:00	-12.9	-12.5	-12	-11.4	-10.4	-9.6	-9	-8.6	-8.1	-7.5	-7.5	-7.2	-6.7	-5.9	-5.7	-5.4	-5.4	-4.9	-4.7	-4.4	-4.3	-4.2	-4.2	-4	-3.4	-3.5	-3.5	-3.2	-3.1	-3.1	-2.9	-2.6
XZ009	申扎县	2020-01-24 12:00:00	-10.5	-11.1	-11.2	-10.9	-10.2	-9.6	-9	-8.7	-8.2	-7.7	-7.7	-7.3	-6.8	-6	-5.8	-5.5	-5.4	-4.9	-4.7	-4.4	-4.4	-4.3	-4.2	-4	-3.4	-3.5	-3.5	-3.3	-3.1	-3.1	-2.9	-2.7
XZ009	申扎县	2020-01-24 13:00:00	-8	-9.4	-9.9	-10	-9.6	-9.3	-8.9	-8.7	-8.3	-7.7	-7.7	-7.4	-6.9	-6.1	-5.9	-5.5	-5.5	-5	-4.7	-4.4	-4.4	-4.3	-4.2	-4	-3.5	-3.5	-3.5	-3.2	-3.1	-3.1	-2.9	-2.7
XZ009	申扎县	2020-01-24 14:00:00	-6.7	-8	-8.6	-8.9	-8.9	-8.7	-8.6	-8.5	-8.2	-7.7	-7.7	-7.4	-7	-6.2	-5.9	-5.6	-5.5	-5	-4.8	-4.4	-4.4	-4.4	-4.2	-4	-3.5	-3.5	-3.5	-3.3	-3.1	-3.2	-2.9	-2.7
XZ009	申扎县	2020-01-24 15:00:00	-5.5	-6.9	-7.6	-8	-8.1	-8.2	-8.2	-8.2	-8	-7.6	-7.6	-7.4	-7	-6.2	-6	-5.7	-5.5	-5.1	-4.8	-4.5	-4.5	-4.4	-4.3	-4.1	-3.5	-3.6	-3.5	-3.3	-3.1	-3.2	-2.9	-2.7
XZ009	申扎县	2020-01-24 16:00:00	-5.5	-6.5	-7	-7.4	-7.5	-7.7	-7.8	-7.9	-7.7	-7.5	-7.5	-7.2	-6.9	-6.2	-6	-5.7	-5.6	-5.2	-4.9	-4.5	-4.5	-4.4	-4.4	-4.1	-3.5	-3.6	-3.5	-3.3	-3.2	-3.2	-2.9	-2.7
XZ009	申扎县	2020-01-24 17:00:00	-4.5	-5.7	-6.4	-6.9	-7	-7.2	-7.4	-7.5	-7.4	-7.2	-7.2	-7	-6.8	-6.2	-6	-5.7	-5.6	-5.2	-4.9	-4.6	-4.5	-4.4	-4.4	-4.2	-3.5	-3.6	-3.5	-3.3	-3.2	-3.2	-3	-2.7
XZ009	申扎县	2020-01-24 18:00:00	-5.3	-5.5	-5.9	-6.3	-6.5	-6.7	-7	-7.2	-7.2	-7	-7	-6.9	-6.7	-6.2	-6	-5.7	-5.7	-5.2	-4.9	-4.6	-4.5	-4.5	-4.4	-4.2	-3.6	-3.7	-3.5	-3.4	-3.2	-3.2	-3	-2.7
XZ009	申扎县	2020-01-24 19:00:00	-7.4	-6.5	-6.3	-6.4	-6.3	-6.4	-6.7	-6.9	-6.9	-6.8	-6.8	-6.7	-6.5	-6	-5.9	-5.7	-5.6	-5.2	-4.9	-4.6	-4.6	-4.5	-4.4	-4.2	-3.6	-3.7	-3.6	-3.4	-3.2	-3.2	-3	-2.7
XZ009	申扎县	2020-01-24 20:00:00	-8.9	-7.5	-7	-6.7	-6.5	-6.5	-6.5	-6.7	-6.7	-6.5	-6.5	-6.5	-6.4	-6	-5.9	-5.6	-5.6	-5.2	-4.9	-4.7	-4.6	-4.5	-4.4	-4.2	-3.6	-3.7	-3.6	-3.4	-3.2	-3.2	-3	-2.7
XZ009	申扎县	2020-01-24 21:00:00	-10	-8.5	-7.7	-7.3	-6.9	-6.6	-6.6	-6.7	-6.6	-6.4	-6.4	-6.4	-6.2	-5.9	-5.8	-5.6	-5.5	-5.2	-4.9	-4.6	-4.5	-4.5	-4.5	-4.2	-3.7	-3.7	-3.6	-3.4	-3.2	-3.2	-3	-2.7
XZ009	申扎县	2020-01-24 22:00:00	-11	-9.3	-8.4	-7.9	-7.2	-6.9	-6.7	-6.8	-6.6	-6.4	-6.4	-6.3	-6.2	-5.8	-5.7	-5.5	-5.5	-5.1	-4.9	-4.6	-4.6	-4.5	-4.4	-4.2	-3.7	-3.7	-3.6	-3.4	-3.2	-3.2	-3	-2.7
XZ009	申扎县	2020-01-24 23:00:00	-12.4	-10.2	-9	-8.4	-7.7	-7.2	-6.9	-6.9	-6.7	-6.4	-6.4	-6.3	-6.1	-5.7	-5.7	-5.5	-5.5	-5.1	-4.9	-4.5	-4.5	-4.5	-4.4	-4.3	-3.7	-3.7	-3.6	-3.4	-3.3	-3.3	-3	-2.7
XZ009	申扎县	2020-01-25 00:00:00	-13.5	-11.2	-9.9	-9	-8.2	-7.5	-7.2	-7	-6.8	-6.5	-6.5	-6.3	-6.1	-5.7	-5.6	-5.4	-5.4	-5	-4.9	-4.5	-4.5	-4.5	-4.4	-4.2	-3.7	-3.7	-3.7	-3.4	-3.3	-3.3	-3	-2.7
XZ009	申扎县	2020-01-25 01:00:00	-14.1	-11.9	-10.5	-9.7	-8.7	-7.9	-7.5	-7.3	-7	-6.7	-6.7	-6.4	-6.2	-5.7	-5.6	-5.4	-5.4	-5	-4.8	-4.5	-4.5	-4.5	-4.4	-4.2	-3.7	-3.8	-3.7	-3.5	-3.3	-3.3	-3	-2.8
XZ009	申扎县	2020-01-25 02:00:00	-14.7	-12.4	-11	-10.1	-9.1	-8.4	-7.8	-7.5	-7.2	-6.8	-6.8	-6.5	-6.2	-5.7	-5.7	-5.4	-5.4	-5	-4.8	-4.5	-4.5	-4.5	-4.4	-4.2	-3.7	-3.7	-3.7	-3.4	-3.3	-3.3	-3.1	-2.8
XZ009	申扎县	2020-01-25 03:00:00	-15.7	-13.2	-11.7	-10.6	-9.5	-8.7	-8.1	-7.8	-7.4	-6.9	-6.9	-6.7	-6.4	-5.8	-5.7	-5.4	-5.4	-5	-4.8	-4.5	-4.5	-4.5	-4.4	-4.2	-3.7	-3.8	-3.7	-3.5	-3.3	-3.3	-3.1	-2.8
XZ009	申扎县	2020-01-25 04:00:00	-16.1	-13.7	-12.2	-11.2	-10	-9	-8.5	-8.1	-7.6	-7.1	-7.1	-6.8	-6.5	-5.9	-5.7	-5.4	-5.4	-5	-4.8	-4.5	-4.5	-4.5	-4.4	-4.2	-3.7	-3.7	-3.7	-3.5	-3.3	-3.3	-3.1	-2.8
XZ009	申扎县	2020-01-25 05:00:00	-16.4	-14	-12.6	-11.6	-10.4	-9.4	-8.7	-8.4	-7.9	-7.4	-7.4	-7	-6.6	-5.9	-5.8	-5.5	-5.5	-5	-4.8	-4.5	-4.5	-4.5	-4.4	-4.2	-3.7	-3.8	-3.7	-3.5	-3.3	-3.3	-3.1	-2.8
XZ009	申扎县	2020-01-25 06:00:00	-16.9	-14.5	-13	-11.9	-10.7	-9.8	-9	-8.6	-8.1	-7.5	-7.5	-7.2	-6.7	-6	-5.9	-5.5	-5.5	-5.1	-4.9	-4.5	-4.5	-4.5	-4.5	-4.2	-3.7	-3.7	-3.7	-3.5	-3.3	-3.3	-3.1	-2.8
XZ009	申扎县	2020-01-25 07:00:00	-17.2	-14.9	-13.4	-12.3	-11	-10	-9.4	-8.9	-8.3	-7.8	-7.8	-7.4	-6.9	-6.1	-5.9	-5.6	-5.6	-5.2	-4.9	-4.6	-4.5	-4.5	-4.5	-4.3	-3.7	-3.8	-3.7	-3.5	-3.3	-3.3	-3.1	-2.8
XZ009	申扎县	2020-01-25 08:00:00	-17.9	-15.4	-13.8	-12.7	-11.4	-10.4	-9.6	-9.1	-8.5	-7.9	-7.9	-7.5	-7	-6.2	-6	-5.7	-5.6	-5.2	-4.9	-4.7	-4.6	-4.5	-4.5	-4.3	-3.7	-3.7	-3.7	-3.5	-3.3	-3.4	-3.1	-2.9
XZ009	申扎县	2020-01-25 09:00:00	-18.4	-15.9	-14.2	-13	-11.7	-10.7	-9.9	-9.4	-8.8	-8.2	-8.2	-7.7	-7.2	-6.4	-6.1	-5.8	-5.7	-5.2	-5	-4.7	-4.6	-4.5	-4.5	-4.3	-3.7	-3.8	-3.7	-3.5	-3.4	-3.3	-3.2	-2.9
XZ009	申扎县	2020-01-25 10:00:00	-17.8	-16	-14.5	-13.4	-12	-10.9	-10.2	-9.6	-9	-8.4	-8.4	-7.9	-7.4	-6.5	-6.2	-5.9	-5.8	-5.3	-5	-4.7	-4.7	-4.6	-4.5	-4.3	-3.7	-3.8	-3.7	-3.5	-3.4	-3.4	-3.1	-2.9
XZ009	申扎县	2020-01-25 11:00:00	-14.7	-14.7	-14.2	-13.4	-12.2	-11.2	-10.4	-9.9	-9.2	-8.5	-8.5	-8	-7.5	-6.6	-6.3	-5.9	-5.9	-5.4	-5.1	-4.7	-4.7	-4.6	-4.5	-4.4	-3.7	-3.9	-3.7	-3.5	-3.4	-3.4	-3.1	-2.9
XZ009	申扎县	2020-01-25 12:00:00	-10.1	-12.2	-12.7	-12.5	-11.8	-11.1	-10.4	-10	-9.4	-8.7	-8.7	-8.2	-7.7	-6.7	-6.4	-6	-5.9	-5.4	-5.2	-4.8	-4.7	-4.7	-4.6	-4.4	-3.8	-3.9	-3.7	-3.5	-3.4	-3.4	-3.2	-2.9
XZ009	申扎县	2020-01-25 13:00:00	-5.7	-9.1	-10.5	-11	-10.9	-10.5	-10.2	-9.9	-9.4	-8.8	-8.8	-8.4	-7.8	-6.8	-6.5	-6.2	-6	-5.5	-5.2	-4.9	-4.8	-4.7	-4.6	-4.4	-3.8	-3.9	-3.7	-3.5	-3.4	-3.4	-3.2	-2.9
XZ009	申扎县	2020-01-25 14:00:00	-2.3	-6.2	-8.2	-9.2	-9.5	-9.7	-9.7	-9.6	-9.2	-8.8	-8.8	-8.4	-7.9	-6.9	-6.6	-6.2	-6.1	-5.6	-5.2	-4.9	-4.9	-4.7	-4.7	-4.4	-3.8	-3.9	-3.8	-3.6	-3.4	-3.4	-3.2	-2.9
XZ009	申扎县	2020-01-25 15:00:00	-1.1	-4.4	-6.3	-7.5	-8.2	-8.7	-8.9	-9	-8.9	-8.5	-8.5	-8.2	-7.8	-7	-6.7	-6.3	-6.2	-5.7	-5.3	-5	-4.9	-4.8	-4.7	-4.5	-3.9	-3.9	-3.8	-3.6	-3.4	-3.4	-3.2	-2.9
XZ009	申扎县	2020-01-25 16:00:00	-0.2	-3.3	-5.1	-6.3	-7	-7.7	-8.1	-8.4	-8.4	-8.2	-8.2	-8	-7.7	-6.9	-6.7	-6.4	-6.2	-5.7	-5.4	-5	-5	-4.9	-4.7	-4.5	-3.9	-3.9	-3.9	-3.6	-3.4	-3.4	-3.2	-2.9
XZ009	申扎县	2020-01-25 17:00:00	-0.3	-2.8	-4.3	-5.4	-6.1	-6.8	-7.4	-7.8	-7.9	-7.8	-7.8	-7.7	-7.5	-6.9	-6.7	-6.4	-6.2	-5.7	-5.4	-5.1	-5	-4.9	-4.8	-4.5	-3.9	-4	-3.9	-3.6	-3.4	-3.5	-3.2	-2.9
XZ009	申扎县	2020-01-25 18:00:00	-0.8	-2.5	-3.7	-4.7	-5.4	-6.1	-6.7	-7.2	-7.4	-7.4	-7.4	-7.4	-7.2	-6.7	-6.6	-6.3	-6.2	-5.7	-5.4	-5.1	-5	-4.9	-4.8	-4.6	-3.9	-4	-3.9	-3.7	-3.5	-3.5	-3.2	-2.9
XZ009	申扎县	2020-01-25 19:00:00	-2.3	-3	-3.8	-4.5	-5	-5.6	-6.2	-6.7	-6.9	-7	-7	-7	-6.9	-6.6	-6.5	-6.2	-6.2	-5.7	-5.4	-5.1	-5	-4.9	-4.9	-4.6	-4	-4	-3.9	-3.7	-3.5	-3.5	-3.2	-2.9
XZ009	申扎县	2020-01-25 20:00:00	-4.7	-4.3	-4.4	-4.7	-4.9	-5.4	-5.9	-6.4	-6.5	-6.6	-6.6	-6.7	-6.7	-6.4	-6.4	-6.1	-6.1	-5.7	-5.4	-5.1	-5	-5	-4.9	-4.6	-4	-4	-3.9	-3.7	-3.5	-3.5	-3.3	-3
XZ009	申扎县	2020-01-25 21:00:00	-7	-5.7	-5.3	-5.2	-5.2	-5.4	-5.7	-6.2	-6.2	-6.4	-6.4	-6.4	-6.4	-6.2	-6.2	-6	-6	-5.7	-5.4	-5.1	-5	-5	-4.9	-4.7	-4	-4	-4	-3.7	-3.5	-3.5	-3.3	-3
XZ009	申扎县	2020-01-25 22:00:00	-8.7	-7	-6.3	-6	-5.7	-5.7	-5.8	-6.1	-6.2	-6.2	-6.2	-6.2	-6.2	-6.1	-6	-5.9	-5.9	-5.5	-5.4	-5	-5	-5	-4.9	-4.7	-4	-4.1	-3.9	-3.7	-3.5	-3.5	-3.3	-3
XZ009	申扎县	2020-01-25 23:00:00	-9.7	-8	-7.1	-6.7	-6.2	-6	-6	-6.2	-6.2	-6.1	-6.1	-6.1	-6	-5.9	-5.9	-5.8	-5.9	-5.5	-5.3	-5	-5	-4.9	-4.9	-4.7	-4	-4.1	-4	-3.7	-3.5	-3.5	-3.3	-3
XZ009	申扎县	2020-01-26 00:00:00	-10.5	-8.8	-7.8	-7.3	-6.7	-6.4	-6.2	-6.3	-6.2	-6.1	-6.1	-6	-6	-5.9	-5.9	-5.7	-5.7	-5.4	-5.2	-4.9	-4.9	-4.9	-4.9	-4.7	-4	-4.1	-4	-3.7	-3.5	-3.5	-3.3	-3
XZ009	申扎县	2020-01-26 01:00:00	-10.8	-9.3	-8.4	-7.8	-7.1	-6.7	-6.5	-6.5	-6.4	-6.2	-6.2	-6.1	-6	-5.7	-5.7	-5.6	-5.7	-5.4	-5.1	-4.9	-4.9	-4.9	-4.8	-4.6	-4	-4.1	-4	-3.7	-3.6	-3.6	-3.4	-3
XZ009	申扎县	2020-01-26 02:00:00	-10.4	-9.4	-8.6	-8.1	-7.5	-7	-6.8	-6.7	-6.5	-6.2	-6.2	-6.2	-6	-5.7	-5.7	-5.5	-5.7	-5.3	-5.1	-4.9	-4.9	-4.8	-4.8	-4.6	-4	-4.1	-4	-3.8	-3.6	-3.6	-3.4	-3
XZ009	申扎县	2020-01-26 03:00:00	-10.4	-9.4	-8.7	-8.3	-7.7	-7.2	-7	-6.9	-6.6	-6.4	-6.4	-6.2	-6	-5.7	-5.7	-5.5	-5.5	-5.2	-5	-4.8	-4.8	-4.8	-4.7	-4.5	-4	-4.1	-4	-3.8	-3.6	-3.6	-3.4	-3.1
XZ009	申扎县	2020-01-26 04:00:00	-10.7	-9.5	-8.9	-8.4	-7.8	-7.4	-7.1	-7	-6.7	-6.5	-6.5	-6.3	-6.1	-5.7	-5.7	-5.5	-5.5	-5.2	-5	-4.8	-4.8	-4.7	-4.7	-4.5	-4	-4	-4	-3.7	-3.6	-3.6	-3.4	-3
XZ009	申扎县	2020-01-26 05:00:00	-10.4	-9.6	-9	-8.6	-8	-7.5	-7.3	-7.2	-6.9	-6.6	-6.6	-6.4	-6.2	-5.7	-5.7	-5.5	-5.5	-5.2	-5	-4.7	-4.7	-4.7	-4.7	-4.5	-4	-4	-4	-3.8	-3.6	-3.6	-3.4	-3
XZ009	申扎县	2020-01-26 06:00:00	-10.1	-9.5	-9	-8.7	-8	-7.7	-7.4	-7.3	-7	-6.7	-6.7	-6.4	-6.2	-5.8	-5.7	-5.5	-5.5	-5.2	-5	-4.7	-4.7	-4.7	-4.7	-4.5	-4	-4	-4	-3.8	-3.6	-3.6	-3.4	-3.1
XZ009	申扎县	2020-01-26 07:00:00	-10.8	-9.7	-9	-8.7	-8.1	-7.7	-7.4	-7.4	-7	-6.7	-6.7	-6.5	-6.2	-5.8	-5.7	-5.5	-5.5	-5.2	-5	-4.7	-4.7	-4.7	-4.7	-4.5	-3.9	-4	-3.9	-3.7	-3.5	-3.6	-3.4	-3.1
XZ009	申扎县	2020-01-26 08:00:00	-11.4	-10	-9.3	-8.9	-8.2	-7.9	-7.5	-7.4	-7.1	-6.8	-6.8	-6.5	-6.3	-5.9	-5.7	-5.5	-5.5	-5.2	-5	-4.7	-4.7	-4.7	-4.7	-4.5	-3.9	-4	-3.9	-3.7	-3.6	-3.6	-3.4	-3
XZ009	申扎县	2020-01-26 09:00:00	-12.4	-10.7	-9.7	-9.2	-8.5	-8	-7.7	-7.5	-7.2	-6.9	-6.9	-6.6	-6.4	-5.9	-5.8	-5.5	-5.5	-5.2	-5	-4.7	-4.7	-4.7	-4.7	-4.5	-3.9	-4	-3.9	-3.7	-3.6	-3.5	-3.4	-3.1
XZ009	申扎县	2020-01-26 10:00:00	-12.5	-11	-10.2	-9.5	-8.7	-8.2	-7.8	-7.6	-7.3	-6.9	-6.9	-6.7	-6.4	-5.9	-5.8	-5.5	-5.5	-5.2	-5	-4.7	-4.7	-4.7	-4.6	-4.5	-3.9	-4	-3.9	-3.7	-3.5	-3.6	-3.4	-3
XZ009	申扎县	2020-01-26 11:00:00	-11.2	-10.6	-10.1	-9.7	-8.9	-8.4	-8	-7.8	-7.5	-7	-7	-6.8	-6.5	-5.9	-5.8	-5.6	-5.5	-5.2	-5	-4.7	-4.7	-4.7	-4.7	-4.5	-3.9	-4	-3.9	-3.7	-3.6	-3.6	-3.4	-3.1
XZ009	申扎县	2020-01-26 12:00:00	-8.9	-9.6	-9.7	-9.4	-8.9	-8.4	-8.1	-7.9	-7.5	-7.2	-7.2	-6.9	-6.5	-6	-5.9	-5.6	-5.6	-5.2	-5	-4.7	-4.7	-4.7	-4.7	-4.5	-3.9	-4	-3.9	-3.7	-3.5	-3.6	-3.4	-3.1
XZ009	申扎县	2020-01-26 13:00:00	-6.2	-8	-8.7	-8.9	-8.5	-8.3	-8	-7.9	-7.6	-7.2	-7.2	-6.9	-6.6	-6	-5.9	-5.7	-5.7	-5.2	-5	-4.7	-4.7	-4.7	-4.7	-4.5	-3.9	-4	-3.9	-3.7	-3.5	-3.6	-3.4	-3.1
XZ009	申扎县	2020-01-26 14:00:00	-2.5	-5.9	-7.3	-7.9	-7.9	-7.9	-7.8	-7.8	-7.5	-7.2	-7.2	-7	-6.7	-6	-5.9	-5.7	-5.7	-5.3	-5	-4.7	-4.7	-4.7	-4.7	-4.5	-3.9	-4	-3.9	-3.7	-3.5	-3.6	-3.4	-3.1
XZ009	申扎县	2020-01-26 15:00:00	-0.7	-3.9	-5.5	-6.5	-6.9	-7.2	-7.4	-7.5	-7.4	-7.2	-7.2	-6.9	-6.7	-6.1	-6	-5.7	-5.7	-5.3	-5	-4.8	-4.7	-4.7	-4.7	-4.5	-3.9	-4	-3.9	-3.7	-3.5	-3.6	-3.4	-3.1
XZ009	申扎县	2020-01-26 16:00:00	0	-2.7	-4.4	-5.3	-5.9	-6.4	-6.8	-7.1	-7	-6.9	-6.9	-6.8	-6.6	-6.1	-6	-5.7	-5.7	-5.3	-5.1	-4.8	-4.8	-4.7	-4.7	-4.5	-3.9	-4	-3.9	-3.7	-3.5	-3.6	-3.4	-3
XZ009	申扎县	2020-01-26 17:00:00	0	-2.1	-3.5	-4.5	-5	-5.7	-6.2	-6.6	-6.7	-6.7	-6.7	-6.6	-6.5	-6	-6	-5.7	-5.7	-5.3	-5.1	-4.8	-4.8	-4.7	-4.7	-4.5	-3.9	-4	-4	-3.7	-3.6	-3.6	-3.4	-3.1
XZ009	申扎县	2020-01-26 18:00:00	-0.5	-2	-3.1	-3.9	-4.5	-5.1	-5.7	-6.1	-6.3	-6.4	-6.4	-6.3	-6.2	-6	-5.9	-5.7	-5.7	-5.3	-5.1	-4.8	-4.8	-4.7	-4.7	-4.5	-4	-4	-4	-3.7	-3.6	-3.6	-3.4	-3.1
XZ009	申扎县	2020-01-26 19:00:00	-2.1	-2.6	-3.2	-3.7	-4.2	-4.7	-5.2	-5.7	-5.9	-6	-6	-6	-6	-5.9	-5.8	-5.6	-5.7	-5.3	-5.1	-4.8	-4.8	-4.7	-4.7	-4.5	-4	-4	-4	-3.7	-3.6	-3.6	-3.4	-3.1
XZ009	申扎县	2020-01-26 20:00:00	-4.5	-3.8	-3.7	-4	-4.2	-4.5	-5	-5.4	-5.6	-5.7	-5.7	-5.8	-5.8	-5.7	-5.7	-5.5	-5.6	-5.2	-5	-4.8	-4.8	-4.7	-4.7	-4.5	-4	-4	-4	-3.8	-3.6	-3.6	-3.4	-3.1
XZ009	申扎县	2020-01-26 21:00:00	-6.7	-5.3	-4.7	-4.5	-4.5	-4.6	-4.9	-5.3	-5.4	-5.5	-5.5	-5.5	-5.6	-5.5	-5.5	-5.4	-5.5	-5.2	-5	-4.7	-4.8	-4.7	-4.7	-4.5	-4	-4	-4	-3.7	-3.6	-3.6	-3.4	-3.1
XZ009	申扎县	2020-01-26 22:00:00	-8.6	-6.7	-5.7	-5.3	-5	-4.9	-5	-5.2	-5.4	-5.4	-5.4	-5.4	-5.5	-5.4	-5.5	-5.4	-5.4	-5.1	-4.9	-4.7	-4.7	-4.7	-4.7	-4.5	-3.9	-4	-4	-3.7	-3.6	-3.6	-3.4	-3.1
XZ009	申扎县	2020-01-26 23:00:00	-9.7	-7.7	-6.7	-6.1	-5.5	-5.3	-5.3	-5.4	-5.4	-5.4	-5.4	-5.4	-5.4	-5.3	-5.4	-5.2	-5.4	-5	-4.9	-4.7	-4.7	-4.7	-4.7	-4.5	-3.9	-4	-4	-3.7	-3.6	-3.6	-3.4	-3.1
XZ009	申扎县	2020-01-27 00:00:00	-10.8	-8.7	-7.5	-6.8	-6.2	-5.7	-5.5	-5.6	-5.5	-5.4	-5.4	-5.4	-5.3	-5.2	-5.3	-5.2	-5.3	-5	-4.8	-4.6	-4.7	-4.6	-4.6	-4.5	-3.9	-4	-3.9	-3.7	-3.6	-3.6	-3.4	-3.2
XZ009	申扎县	2020-01-27 01:00:00	-11.5	-9.4	-8.2	-7.4	-6.7	-6.2	-5.9	-5.9	-5.7	-5.5	-5.5	-5.4	-5.4	-5.2	-5.2	-5.1	-5.2	-4.9	-4.7	-4.5	-4.6	-4.6	-4.6	-4.4	-3.9	-4	-3.9	-3.7	-3.6	-3.6	-3.4	-3.1
XZ009	申扎县	2020-01-27 02:00:00	-12	-9.9	-8.7	-8	-7.2	-6.6	-6.2	-6.2	-5.9	-5.7	-5.7	-5.5	-5.4	-5.2	-5.2	-5.1	-5.2	-4.9	-4.7	-4.5	-4.5	-4.5	-4.5	-4.4	-3.9	-4	-3.9	-3.7	-3.6	-3.6	-3.4	-3.1
XZ009	申扎县	2020-01-27 03:00:00	-12.7	-10.5	-9.2	-8.4	-7.6	-7	-6.6	-6.4	-6.1	-5.9	-5.9	-5.7	-5.5	-5.2	-5.2	-5	-5.2	-4.9	-4.7	-4.4	-4.5	-4.5	-4.5	-4.4	-3.9	-4	-3.9	-3.7	-3.6	-3.6	-3.4	-3.1
XZ009	申扎县	2020-01-27 04:00:00	-13.2	-11	-9.7	-8.9	-8	-7.4	-6.9	-6.7	-6.4	-6	-6	-5.8	-5.6	-5.2	-5.2	-5	-5.1	-4.8	-4.7	-4.4	-4.5	-4.5	-4.5	-4.4	-3.9	-4	-3.9	-3.7	-3.5	-3.6	-3.4	-3.1
XZ009	申扎县	2020-01-27 05:00:00	-13.7	-11.5	-10.2	-9.4	-8.4	-7.7	-7.2	-7	-6.6	-6.2	-6.2	-5.9	-5.7	-5.3	-5.2	-5.1	-5.1	-4.8	-4.7	-4.4	-4.5	-4.5	-4.5	-4.4	-3.9	-3.9	-3.9	-3.7	-3.5	-3.6	-3.4	-3.1
XZ009	申扎县	2020-01-27 06:00:00	-14.3	-12	-10.7	-9.8	-8.8	-8	-7.5	-7.2	-6.8	-6.4	-6.4	-6.1	-5.8	-5.4	-5.3	-5.1	-5.2	-4.8	-4.6	-4.4	-4.4	-4.5	-4.5	-4.4	-3.8	-3.9	-3.9	-3.7	-3.5	-3.6	-3.4	-3.1
XZ009	申扎县	2020-01-27 07:00:00	-14.7	-12.5	-11.1	-10.2	-9.2	-8.4	-7.8	-7.5	-7	-6.6	-6.6	-6.3	-6	-5.5	-5.4	-5.1	-5.2	-4.9	-4.7	-4.4	-4.5	-4.4	-4.4	-4.3	-3.8	-3.9	-3.9	-3.7	-3.5	-3.5	-3.4	-3.1
XZ009	申扎县	2020-01-27 08:00:00	-15.2	-12.9	-11.5	-10.6	-9.5	-8.7	-8.1	-7.7	-7.3	-6.8	-6.8	-6.5	-6.1	-5.5	-5.4	-5.2	-5.2	-4.9	-4.7	-4.4	-4.5	-4.4	-4.4	-4.3	-3.8	-3.9	-3.9	-3.7	-3.5	-3.5	-3.4	-3.1
XZ009	申扎县	2020-01-27 09:00:00	-15.7	-13.4	-12	-11	-9.9	-9	-8.4	-8	-7.5	-7	-7	-6.7	-6.3	-5.7	-5.5	-5.2	-5.3	-4.9	-4.7	-4.4	-4.5	-4.4	-4.4	-4.3	-3.8	-3.9	-3.9	-3.7	-3.5	-3.5	-3.4	-3
XZ009	申扎县	2020-01-27 10:00:00	-15.4	-13.7	-12.4	-11.4	-10.3	-9.4	-8.7	-8.2	-7.7	-7.2	-7.2	-6.8	-6.4	-5.7	-5.6	-5.4	-5.4	-4.9	-4.7	-4.5	-4.5	-4.5	-4.5	-4.3	-3.8	-3.9	-3.8	-3.7	-3.5	-3.5	-3.4	-3
XZ009	申扎县	2020-01-27 11:00:00	-12.3	-12.4	-12	-11.4	-10.4	-9.6	-8.9	-8.5	-8	-7.4	-7.4	-7	-6.6	-5.9	-5.7	-5.4	-5.4	-5	-4.7	-4.5	-4.5	-4.5	-4.4	-4.3	-3.7	-3.9	-3.8	-3.7	-3.5	-3.5	-3.4	-3
XZ009	申扎县	2020-01-27 12:00:00	-9.2	-10.5	-10.8	-10.7	-10.1	-9.5	-9	-8.7	-8.2	-7.6	-7.6	-7.2	-6.7	-6	-5.8	-5.5	-5.5	-5	-4.8	-4.5	-4.5	-4.5	-4.5	-4.3	-3.7	-3.9	-3.9	-3.7	-3.5	-3.5	-3.3	-3
XZ009	申扎县	2020-01-27 13:00:00	-6.4	-8.5	-9.4	-9.6	-9.4	-9.1	-8.8	-8.6	-8.2	-7.7	-7.7	-7.3	-6.9	-6.1	-5.9	-5.6	-5.5	-5.1	-4.9	-4.6	-4.5	-4.5	-4.5	-4.4	-3.8	-3.9	-3.8	-3.6	-3.5	-3.5	-3.4	-3
XZ009	申扎县	2020-01-27 14:00:00	-4.1	-6.5	-7.8	-8.4	-8.5	-8.5	-8.4	-8.4	-8	-7.7	-7.7	-7.4	-6.9	-6.2	-6	-5.7	-5.6	-5.2	-4.9	-4.6	-4.6	-4.5	-4.5	-4.4	-3.8	-3.9	-3.9	-3.6	-3.5	-3.5	-3.3	-3
XZ009	申扎县	2020-01-27 15:00:00	-2.4	-5	-6.4	-7.1	-7.5	-7.7	-7.9	-8	-7.9	-7.5	-7.5	-7.2	-6.9	-6.2	-6	-5.7	-5.7	-5.2	-5	-4.7	-4.7	-4.6	-4.5	-4.4	-3.8	-3.9	-3.9	-3.7	-3.5	-3.5	-3.4	-3
XZ009	申扎县	2020-01-27 16:00:00	-1.4	-3.9	-5.2	-6	-6.5	-7	-7.3	-7.5	-7.5	-7.3	-7.3	-7.1	-6.9	-6.2	-6	-5.8	-5.7	-5.3	-5	-4.7	-4.7	-4.6	-4.6	-4.4	-3.8	-3.9	-3.9	-3.7	-3.5	-3.5	-3.4	-3
XZ009	申扎县	2020-01-27 17:00:00	-1.3	-3.3	-4.5	-5.3	-5.8	-6.3	-6.7	-7	-7.1	-7	-7	-6.9	-6.7	-6.2	-6	-5.8	-5.7	-5.3	-5	-4.8	-4.7	-4.7	-4.6	-4.4	-3.9	-3.9	-3.9	-3.7	-3.5	-3.5	-3.4	-3.1
XZ009	申扎县	2020-01-27 18:00:00	-1.7	-3.2	-4.1	-4.9	-5.3	-5.7	-6.2	-6.6	-6.7	-6.7	-6.7	-6.6	-6.5	-6.1	-6	-5.8	-5.8	-5.4	-5	-4.8	-4.8	-4.7	-4.7	-4.4	-3.9	-4	-3.9	-3.7	-3.5	-3.5	-3.4	-3
XZ009	申扎县	2020-01-27 19:00:00	-2.7	-3.5	-4.1	-4.6	-4.9	-5.4	-5.8	-6.2	-6.4	-6.4	-6.4	-6.4	-6.3	-6	-5.9	-5.7	-5.7	-5.3	-5.1	-4.8	-4.8	-4.7	-4.7	-4.5	-3.9	-4	-3.9	-3.7	-3.5	-3.5	-3.4	-3.1
XZ009	申扎县	2020-01-27 20:00:00	-4.7	-4.4	-4.5	-4.7	-4.9	-5.2	-5.5	-5.9	-6	-6.1	-6.1	-6.1	-6.1	-5.9	-5.9	-5.7	-5.7	-5.3	-5.1	-4.8	-4.8	-4.7	-4.7	-4.5	-3.9	-4	-3.9	-3.7	-3.5	-3.6	-3.4	-3
XZ009	申扎县	2020-01-27 21:00:00	-6.9	-5.7	-5.2	-5.2	-5	-5.2	-5.5	-5.8	-5.9	-5.9	-5.9	-5.9	-5.9	-5.7	-5.7	-5.6	-5.6	-5.3	-5	-4.7	-4.7	-4.7	-4.7	-4.5	-3.9	-4	-3.9	-3.7	-3.5	-3.5	-3.4	-3.1
XZ009	申扎县	2020-01-27 22:00:00	-8.5	-6.9	-6.2	-5.9	-5.5	-5.4	-5.5	-5.7	-5.8	-5.8	-5.8	-5.8	-5.7	-5.6	-5.7	-5.5	-5.5	-5.2	-5	-4.7	-4.7	-4.7	-4.7	-4.5	-3.9	-4	-4	-3.7	-3.6	-3.6	-3.4	-3.1
XZ009	申扎县	2020-01-27 23:00:00	-9.7	-7.9	-7	-6.5	-6	-5.8	-5.7	-5.9	-5.8	-5.7	-5.7	-5.7	-5.7	-5.5	-5.5	-5.4	-5.4	-5.2	-4.9	-4.7	-4.7	-4.7	-4.7	-4.5	-3.9	-4	-4	-3.7	-3.5	-3.6	-3.4	-3.1
XZ009	申扎县	2020-01-28 00:00:00	-10.5	-8.7	-7.7	-7.2	-6.5	-6.2	-6	-6	-5.9	-5.7	-5.7	-5.7	-5.6	-5.4	-5.5	-5.3	-5.4	-5.1	-4.9	-4.7	-4.7	-4.7	-4.7	-4.5	-3.9	-4	-3.9	-3.7	-3.6	-3.6	-3.4	-3.1
XZ009	申扎县	2020-01-28 01:00:00	-10.7	-9.2	-8.2	-7.7	-7	-6.5	-6.3	-6.2	-6	-5.9	-5.9	-5.7	-5.6	-5.4	-5.4	-5.3	-5.4	-5	-4.9	-4.6	-4.7	-4.7	-4.6	-4.5	-3.9	-4	-4	-3.7	-3.6	-3.6	-3.4	-3.1
XZ009	申扎县	2020-01-28 02:00:00	-10.6	-9.4	-8.6	-8	-7.3	-6.9	-6.5	-6.4	-6.2	-6	-6	-5.8	-5.7	-5.4	-5.4	-5.2	-5.3	-5	-4.8	-4.5	-4.6	-4.6	-4.6	-4.4	-3.9	-4	-3.9	-3.7	-3.6	-3.6	-3.4	-3.1
XZ009	申扎县	2020-01-28 03:00:00	-10.5	-9.4	-8.7	-8.3	-7.6	-7.1	-6.8	-6.7	-6.4	-6.1	-6.1	-5.9	-5.7	-5.4	-5.4	-5.2	-5.3	-5	-4.8	-4.5	-4.6	-4.6	-4.6	-4.4	-3.9	-4	-3.9	-3.7	-3.6	-3.6	-3.4	-3.2
XZ009	申扎县	2020-01-28 04:00:00	-11.1	-9.7	-9	-8.5	-7.8	-7.3	-7	-6.9	-6.5	-6.2	-6.2	-6	-5.9	-5.4	-5.4	-5.2	-5.3	-5	-4.7	-4.5	-4.6	-4.5	-4.5	-4.4	-3.9	-4	-3.9	-3.7	-3.6	-3.7	-3.4	-3.2
XZ009	申扎县	2020-01-28 05:00:00	-11.2	-10	-9.3	-8.7	-8	-7.5	-7.2	-7	-6.7	-6.4	-6.4	-6.1	-5.9	-5.5	-5.4	-5.2	-5.3	-4.9	-4.7	-4.5	-4.5	-4.5	-4.5	-4.4	-3.9	-4	-3.9	-3.7	-3.6	-3.6	-3.4	-3.1
XZ009	申扎县	2020-01-28 06:00:00	-11.4	-10.2	-9.5	-9	-8.2	-7.7	-7.4	-7.1	-6.8	-6.5	-6.5	-6.2	-6	-5.5	-5.4	-5.2	-5.3	-4.9	-4.8	-4.5	-4.5	-4.5	-4.5	-4.4	-3.9	-4	-3.9	-3.7	-3.5	-3.6	-3.4	-3.1
XZ009	申扎县	2020-01-28 07:00:00	-12.1	-10.6	-9.7	-9.2	-8.4	-7.9	-7.5	-7.3	-7	-6.6	-6.6	-6.4	-6	-5.5	-5.5	-5.3	-5.3	-5	-4.8	-4.5	-4.5	-4.5	-4.5	-4.4	-3.9	-4	-3.9	-3.7	-3.6	-3.6	-3.4	-3.2
XZ009	申扎县	2020-01-28 08:00:00	-13.2	-11.3	-10.2	-9.5	-8.7	-8.1	-7.7	-7.5	-7.1	-6.7	-6.7	-6.4	-6.1	-5.6	-5.5	-5.3	-5.3	-5	-4.8	-4.5	-4.5	-4.5	-4.5	-4.4	-3.9	-4	-3.9	-3.7	-3.5	-3.6	-3.4	-3.1
XZ009	申扎县	2020-01-28 09:00:00	-13.9	-11.8	-10.7	-9.9	-9	-8.4	-7.9	-7.7	-7.2	-6.9	-6.9	-6.5	-6.2	-5.7	-5.6	-5.4	-5.4	-5	-4.8	-4.5	-4.5	-4.5	-4.5	-4.4	-3.8	-4	-3.9	-3.7	-3.5	-3.6	-3.4	-3.2
XZ009	申扎县	2020-01-28 10:00:00	-13.7	-12.2	-11.1	-10.3	-9.4	-8.7	-8.1	-7.9	-7.4	-7	-7	-6.7	-6.4	-5.8	-5.6	-5.4	-5.4	-5	-4.8	-4.5	-4.5	-4.5	-4.5	-4.4	-3.9	-4	-3.9	-3.7	-3.5	-3.6	-3.4	-3.1
XZ009	申扎县	2020-01-28 11:00:00	-10.2	-10.9	-10.7	-10.3	-9.5	-8.9	-8.4	-8	-7.6	-7.1	-7.1	-6.8	-6.5	-5.9	-5.7	-5.5	-5.4	-5	-4.9	-4.5	-4.6	-4.5	-4.5	-4.4	-3.8	-4	-3.9	-3.7	-3.5	-3.6	-3.4	-3.1
XZ009	申扎县	2020-01-28 12:00:00	-6.7	-8.7	-9.4	-9.5	-9.2	-8.7	-8.4	-8.2	-7.7	-7.3	-7.3	-6.9	-6.6	-5.9	-5.7	-5.5	-5.5	-5.1	-4.9	-4.6	-4.6	-4.6	-4.5	-4.4	-3.9	-4	-3.9	-3.7	-3.5	-3.5	-3.4	-3.1
XZ009	申扎县	2020-01-28 13:00:00	-5.2	-7.1	-8	-8.4	-8.4	-8.2	-8.2	-8	-7.7	-7.4	-7.4	-7	-6.7	-6	-5.9	-5.5	-5.5	-5.2	-4.9	-4.6	-4.6	-4.6	-4.5	-4.4	-3.9	-3.9	-3.9	-3.7	-3.5	-3.6	-3.4	-3.1
XZ009	申扎县	2020-01-28 14:00:00	-3.2	-5.6	-6.8	-7.4	-7.5	-7.7	-7.7	-7.8	-7.6	-7.3	-7.3	-7	-6.7	-6	-5.9	-5.7	-5.6	-5.2	-4.9	-4.7	-4.7	-4.6	-4.6	-4.4	-3.9	-4	-3.9	-3.7	-3.5	-3.6	-3.4	-3.1
XZ009	申扎县	2020-01-28 15:00:00	-1.5	-4.2	-5.5	-6.4	-6.7	-7	-7.2	-7.4	-7.3	-7.1	-7.1	-6.9	-6.7	-6.1	-5.9	-5.7	-5.7	-5.2	-5	-4.7	-4.7	-4.6	-4.6	-4.4	-3.9	-4	-3.9	-3.7	-3.5	-3.6	-3.4	-3.1
XZ009	申扎县	2020-01-28 16:00:00	0	-2.8	-4.4	-5.3	-5.9	-6.3	-6.7	-7	-7	-6.9	-6.9	-6.7	-6.5	-6.1	-5.9	-5.7	-5.7	-5.2	-5	-4.7	-4.7	-4.7	-4.6	-4.4	-3.9	-4	-3.9	-3.7	-3.5	-3.6	-3.4	-3.2
XZ009	申扎县	2020-01-28 17:00:00	0.4	-1.9	-3.4	-4.4	-5	-5.6	-6.1	-6.5	-6.6	-6.6	-6.6	-6.5	-6.4	-6	-5.9	-5.7	-5.7	-5.3	-5	-4.7	-4.7	-4.7	-4.6	-4.5	-3.9	-4	-3.9	-3.7	-3.6	-3.6	-3.4	-3.2
XZ009	申扎县	2020-01-28 18:00:00	0	-1.7	-2.9	-3.7	-4.4	-5	-5.5	-6	-6.2	-6.2	-6.2	-6.2	-6.2	-5.9	-5.9	-5.7	-5.7	-5.3	-5	-4.7	-4.7	-4.7	-4.7	-4.5	-3.9	-4	-3.9	-3.7	-3.6	-3.6	-3.4	-3.1
XZ009	申扎县	2020-01-28 19:00:00	-1.2	-2	-2.8	-3.5	-4	-4.5	-5.1	-5.6	-5.9	-5.9	-5.9	-6	-6	-5.8	-5.8	-5.6	-5.6	-5.2	-5	-4.7	-4.7	-4.7	-4.7	-4.5	-3.9	-4	-4	-3.7	-3.6	-3.6	-3.4	-3.2
XZ009	申扎县	2020-01-28 20:00:00	-3.7	-3.2	-3.3	-3.6	-3.9	-4.3	-4.8	-5.3	-5.5	-5.6	-5.6	-5.7	-5.7	-5.7	-5.7	-5.5	-5.5	-5.2	-5	-4.7	-4.7	-4.7	-4.7	-4.5	-3.9	-4	-4	-3.7	-3.6	-3.6	-3.4	-3.2
XZ009	申扎县	2020-01-28 21:00:00	-6.4	-4.9	-4.3	-4.2	-4.2	-4.4	-4.7	-5.1	-5.3	-5.4	-5.4	-5.5	-5.5	-5.5	-5.5	-5.4	-5.5	-5.2	-4.9	-4.7	-4.7	-4.7	-4.7	-4.5	-3.9	-4	-4	-3.8	-3.6	-3.6	-3.4	-3.2
XZ009	申扎县	2020-01-28 22:00:00	-7.6	-6	-5.3	-5	-4.6	-4.7	-4.8	-5.1	-5.2	-5.2	-5.2	-5.3	-5.4	-5.4	-5.4	-5.3	-5.4	-5	-4.9	-4.7	-4.7	-4.7	-4.7	-4.5	-3.9	-4	-4	-3.8	-3.6	-3.7	-3.4	-3.2
XZ009	申扎县	2020-01-28 23:00:00	-8.4	-6.8	-6	-5.6	-5.2	-5	-5	-5.2	-5.2	-5.2	-5.2	-5.2	-5.2	-5.2	-5.3	-5.2	-5.3	-5	-4.9	-4.6	-4.6	-4.6	-4.6	-4.5	-3.9	-4	-4	-3.7	-3.6	-3.6	-3.4	-3.2
XZ009	申扎县	2020-01-29 00:00:00	-9.4	-7.6	-6.7	-6.2	-5.6	-5.4	-5.2	-5.4	-5.3	-5.2	-5.2	-5.2	-5.2	-5.1	-5.2	-5.1	-5.2	-4.9	-4.8	-4.5	-4.6	-4.6	-4.6	-4.5	-3.9	-4	-4	-3.7	-3.6	-3.7	-3.4	-3.2
XZ009	申扎县	2020-01-29 01:00:00	-10.2	-8.4	-7.3	-6.7	-6.1	-5.7	-5.5	-5.5	-5.4	-5.3	-5.3	-5.2	-5.2	-5	-5.1	-5	-5.2	-4.9	-4.7	-4.5	-4.5	-4.5	-4.5	-4.4	-3.9	-4	-4	-3.7	-3.6	-3.7	-3.4	-3.2
XZ009	申扎县	2020-01-29 02:00:00	-10.7	-8.9	-7.9	-7.2	-6.5	-6.1	-5.8	-5.8	-5.6	-5.4	-5.4	-5.3	-5.2	-5	-5.1	-5	-5.1	-4.8	-4.7	-4.5	-4.5	-4.5	-4.5	-4.4	-3.9	-4	-3.9	-3.7	-3.6	-3.7	-3.4	-3.2
[truncated: 14,474 more rows]
