# Supplementary material for: Characteristics of water and heat change during the freezing-thawing process at an alpine steppe in seasonally frozen ground of the Northern Tibetan plateau
Source: Frontiers journal article supplement (doi:10.3389/fenvs.2024.1411704), 2024-06-20
Supplement: Table_2.XLSX [file Table_2.XLSX]

## Sheet: Sheet1
台站编号	台站名称	监测时间	监测深度(单位：cm)																监测深度(单位：cm)
			2.5cm	5cm	7.5cm	10cm	12.5cm	15cm	17.5cm	20cm	22.5cm	25cm	27.5cm	30cm	32.5cm	35cm	37.5cm	40cm	42.5cm	45cm	47.5cm	50cm	52.5cm	55cm	57.5cm	60cm	62.5cm	65cm	67.5cm	70cm	72.5cm	75cm	77.5cm	80cm
XZ009	申扎县	2019-11-01 16:00:00	3.2	3.3	1.1	1	3.4	6.2	11.1	7.8	7.9	9.8	10.1	11.3	12.2	10.9	17	16.6	15	16.5	14.8	16.8	14.8	15.2	20.2	15.9	13.6	13.3	15.3	11.2	15.5	18.6	17.1	25.7
XZ009	申扎县	2019-11-01 17:00:00	3.1	3.3	1.2	1	3.4	6.1	11	7.7	7.8	9.7	10	11.2	12.1	10.8	16.8	16.4	14.9	16.3	14.6	16.7	14.7	15.1	20.1	15.8	13.5	13.2	15.3	11.1	15.4	18.5	17	25.7
XZ009	申扎县	2019-11-01 18:00:00	3	3.3	1.2	0.9	3.4	5.9	10.8	7.5	7.6	9.6	9.8	11	11.8	10.5	16.4	15.9	14.5	15.8	14.3	16.5	14.4	14.9	19.8	15.6	13.2	12.9	15	10.9	15.1	18.2	16.8	25.6
XZ009	申扎县	2019-11-01 19:00:00	2.9	3.2	1.2	0.9	3.3	5.7	10.5	7.2	7.4	9.5	9.6	10.7	11.6	10.3	16	15.5	14.2	15.4	13.8	16.2	14.1	14.7	19.6	15.5	12.9	12.7	14.8	10.7	14.9	18.1	16.8	25.5
XZ009	申扎县	2019-11-01 20:00:00	2.8	3.2	1.2	0.9	3.3	5.6	10.3	7.1	7.3	9.3	9.5	10.5	11.4	10.1	15.8	15.2	13.9	15.1	13.5	16	13.9	14.5	19.4	15.3	12.7	12.4	14.6	10.5	14.7	17.9	16.7	25.4
XZ009	申扎县	2019-11-01 21:00:00	2.6	3.1	1.2	0.8	3.3	5.4	10.1	6.9	7.1	9.2	9.4	10.4	11.2	9.9	15.5	14.8	13.6	14.8	13.2	15.8	13.7	14.3	19.2	15.1	12.5	12.2	14.3	10.3	14.5	17.8	16.6	25.4
XZ009	申扎县	2019-11-01 22:00:00	2.5	3.1	1.2	0.8	3.2	5.3	9.9	6.8	7	9.1	9.2	10.3	11.1	9.8	15.3	14.6	13.4	14.4	13	15.6	13.5	14.2	19	15	12.3	12	14.1	10.2	14.4	17.7	16.5	25.3
XZ009	申扎县	2019-11-01 23:00:00	2.3	3	1.2	0.7	3.2	5.2	9.8	6.6	6.9	8.9	9.1	10.1	10.9	9.7	15	14.4	13.2	14.3	12.8	15.5	13.4	14	18.9	14.9	12.1	11.9	14	10	14.2	17.6	16.4	25.2
XZ009	申扎县	2019-11-02 00:00:00	2	3	1.2	0.7	3.2	5.1	9.7	6.5	6.8	8.8	9	10	10.8	9.5	14.8	14.1	13	14	12.6	15.3	13.2	13.9	18.7	14.8	12	11.7	13.8	9.8	14	17.4	16.3	25.2
XZ009	申扎县	2019-11-02 01:00:00	1.5	2.8	1.2	0.7	3.1	5	9.6	6.4	6.7	8.7	8.9	9.8	10.7	9.4	14.6	13.9	12.8	13.8	12.5	15.2	13.1	13.8	18.6	14.7	11.8	11.5	13.7	9.7	13.9	17.3	16.2	25.1
XZ009	申扎县	2019-11-02 02:00:00	0.6	2.5	1.1	0.7	3.1	4.8	9.4	6.3	6.6	8.6	8.8	9.7	10.6	9.3	14.4	13.7	12.7	13.7	12.4	15.1	13	13.7	18.4	14.6	11.7	11.4	13.5	9.6	13.7	17.2	16.2	25
XZ009	申扎县	2019-11-02 03:00:00	0.1	2.2	1	0.7	3	4.8	9.3	6.2	6.6	8.5	8.7	9.6	10.5	9.2	14.3	13.5	12.6	13.5	12.2	14.9	12.9	13.6	18.3	14.5	11.6	11.2	13.4	9.4	13.6	17.1	16.1	25
XZ009	申扎县	2019-11-02 04:00:00	0	1.7	0.9	0.7	3	4.7	9.2	6.1	6.5	8.5	8.6	9.6	10.4	9.1	14.2	13.4	12.4	13.4	12.2	14.8	12.8	13.5	18.2	14.4	11.4	11.1	13.2	9.3	13.5	17	16	24.9
XZ009	申扎县	2019-11-02 05:00:00	0	1.1	0.8	0.7	3	4.6	9.2	6	6.5	8.5	8.6	9.5	10.3	9.1	14.1	13.3	12.2	13.3	12.1	14.8	12.7	13.4	18.1	14.3	11.3	11	13.1	9.2	13.4	16.9	15.9	24.8
XZ009	申扎县	2019-11-02 06:00:00	0	0.6	0.7	0.7	2.9	4.6	9.1	6	6.4	8.4	8.5	9.4	10.2	9.1	14	13.2	12.2	13.2	12	14.7	12.6	13.4	18.1	14.3	11.3	10.9	13	9.1	13.3	16.8	15.8	24.7
XZ009	申扎县	2019-11-02 07:00:00	0	0.4	0.7	0.7	2.9	4.5	9.1	5.9	6.4	8.4	8.4	9.4	10.2	9	14	13.1	12.2	13.1	11.9	14.7	12.6	13.3	17.9	14.2	11.1	10.8	12.9	9	13.2	16.7	15.8	24.7
XZ009	申扎县	2019-11-02 08:00:00	0	0.3	0.5	0.7	2.9	4.5	9	5.9	6.4	8.4	8.4	9.4	10.1	8.9	13.9	13	12.1	13	11.9	14.7	12.5	13.2	17.9	14.1	11	10.7	12.8	8.9	13.1	16.6	15.6	24.6
XZ009	申扎县	2019-11-02 09:00:00	0	0.3	0.3	0.7	2.8	4.5	9	5.8	6.3	8.4	8.4	9.3	10.1	8.9	13.8	13	12	12.9	11.9	14.6	12.4	13.2	17.8	14.1	11	10.6	12.7	8.8	13	16.4	15.6	24.5
XZ009	申扎县	2019-11-02 10:00:00	0	0.3	0.2	0.6	2.8	4.4	8.9	5.7	6.3	8.3	8.3	9.2	10	8.9	13.7	12.9	11.9	12.9	11.9	14.5	12.4	13.1	17.7	14.1	10.9	10.5	12.6	8.7	12.9	16.4	15.5	24.5
XZ009	申扎县	2019-11-02 11:00:00	0	0.4	0.3	0.6	2.8	4.4	8.9	5.7	6.2	8.3	8.3	9.2	10	8.8	13.6	12.8	11.8	12.8	11.8	14.5	12.4	13.1	17.7	14	10.9	10.4	12.5	8.7	12.8	16.3	15.4	24.4
XZ009	申扎县	2019-11-02 12:00:00	0	0.5	0.3	0.6	2.8	4.3	8.8	5.7	6.2	8.2	8.3	9.2	9.9	8.7	13.6	12.7	11.7	12.7	11.7	14.4	12.3	13.1	17.6	13.9	10.8	10.4	12.4	8.6	12.8	16.2	15.4	24.4
XZ009	申扎县	2019-11-02 13:00:00	0.6	0.7	0.4	0.7	2.8	4.3	8.8	5.6	6.2	8.2	8.3	9.1	9.9	8.7	13.5	12.6	11.7	12.6	11.7	14.3	12.2	13	17.6	13.9	10.7	10.3	12.3	8.5	12.7	16.2	15.3	24.3
XZ009	申扎县	2019-11-02 14:00:00	2.9	0.9	0.7	0.7	2.9	4.2	8.7	5.6	6.1	8.2	8.2	9.1	9.9	8.7	13.5	12.6	11.6	12.6	11.6	14.3	12.2	12.9	17.5	13.8	10.7	10.3	12.3	8.5	12.6	16.1	15.3	24.2
XZ009	申扎县	2019-11-02 15:00:00	3.1	3.2	1.1	0.8	3	4.2	8.6	5.6	6	8.2	8.2	9	9.8	8.6	13.4	12.5	11.6	12.5	11.5	14.2	12.1	12.9	17.4	13.8	10.6	10.2	12.2	8.4	12.6	16	15.2	24.2
XZ009	申扎县	2019-11-02 16:00:00	3.1	3.4	1.5	0.9	3.1	4.3	8.6	5.6	6	8.1	8.2	9	9.7	8.6	13.3	12.5	11.5	12.4	11.5	14.1	12.1	12.8	17.4	13.7	10.5	10.1	12.1	8.3	12.5	16	15.2	24.1
XZ009	申扎县	2019-11-02 17:00:00	3	3.4	1.6	1.1	3.1	4.3	8.5	5.6	6	8.1	8.1	8.9	9.7	8.5	13.2	12.4	11.4	12.4	11.4	14.1	12	12.8	17.3	13.7	10.5	10.1	12	8.3	12.4	15.9	15.1	24.1
XZ009	申扎县	2019-11-02 18:00:00	2.8	3.3	1.6	1.2	3.2	4.4	8.5	5.7	6	8.1	8.1	8.9	9.7	8.5	13.2	12.3	11.4	12.3	11.4	14	12	12.7	17.2	13.6	10.4	10	12	8.2	12.4	15.9	15.1	24
XZ009	申扎县	2019-11-02 19:00:00	2.7	3.2	1.6	1.2	3.2	4.4	8.5	5.7	6	8.1	8.1	8.9	9.6	8.4	13.1	12.3	11.3	12.2	11.3	14	11.9	12.6	17.1	13.6	10.3	10	11.9	8.2	12.3	15.8	15	24
XZ009	申扎县	2019-11-02 20:00:00	2.5	3.2	1.6	1.1	3.1	4.4	8.4	5.7	6	8.1	8.1	8.9	9.6	8.4	13	12.2	11.3	12.1	11.2	14	11.9	12.6	17.1	13.5	10.3	9.9	11.8	8.1	12.3	15.8	15	23.9
XZ009	申扎县	2019-11-02 21:00:00	2.3	3.1	1.5	1.1	3.1	4.3	8.4	5.6	6	8	8.1	8.8	9.6	8.4	13	12.1	11.2	12.1	11.2	13.8	11.8	12.5	17	13.5	10.2	9.9	11.7	8	12.3	15.7	14.9	23.9
XZ009	申扎县	2019-11-02 22:00:00	2.2	3.1	1.5	1.1	3.1	4.3	8.4	5.6	5.9	8	8	8.8	9.5	8.3	12.9	12.1	11.1	12	11.2	13.8	11.8	12.5	17	13.4	10.2	9.8	11.6	8	12.2	15.7	14.9	23.9
XZ009	申扎县	2019-11-02 23:00:00	2.1	3	1.5	1	3.1	4.2	8.3	5.6	5.9	8	8	8.8	9.5	8.3	12.9	12	11.1	12	11.1	13.8	11.8	12.5	16.9	13.4	10.1	9.7	11.6	7.9	12.1	15.7	14.9	23.8
XZ009	申扎县	2019-11-03 00:00:00	2	3	1.5	1	3	4.2	8.3	5.5	5.9	8	8	8.8	9.5	8.3	12.9	12	11.1	11.9	11	13.8	11.7	12.4	16.8	13.3	10	9.7	11.5	7.9	12.1	15.6	14.8	23.8
XZ009	申扎县	2019-11-03 01:00:00	1.7	2.9	1.5	1	3	4.2	8.3	5.5	5.8	7.9	7.9	8.7	9.4	8.2	12.8	11.9	11	11.9	11	13.7	11.7	12.4	16.8	13.3	10	9.6	11.5	7.8	12	15.6	14.8	23.7
XZ009	申扎县	2019-11-03 02:00:00	1.5	2.8	1.5	1	3	4.1	8.2	5.4	5.8	7.9	7.9	8.7	9.4	8.2	12.7	11.9	10.9	11.8	10.9	13.7	11.7	12.4	16.8	13.3	9.9	9.6	11.4	7.8	12	15.5	14.7	23.7
XZ009	申扎县	2019-11-03 03:00:00	1	2.7	1.4	1	3	4.1	8.2	5.4	5.8	7.8	7.8	8.6	9.3	8.2	12.6	11.8	10.9	11.7	10.9	13.6	11.6	12.3	16.7	13.2	9.9	9.5	11.3	7.8	12	15.5	14.7	23.7
XZ009	申扎县	2019-11-03 04:00:00	0.5	2.4	1.3	1	3	4	8.2	5.3	5.7	7.8	7.8	8.5	9.3	8.1	12.6	11.8	10.9	11.7	10.9	13.6	11.6	12.3	16.7	13.2	9.8	9.5	11.3	7.7	11.9	15.4	14.7	23.7
XZ009	申扎县	2019-11-03 05:00:00	0.1	2.1	1.2	1	2.9	4	8.1	5.3	5.7	7.8	7.8	8.6	9.3	8.1	12.5	11.7	10.8	11.7	10.9	13.5	11.6	12.3	16.6	13.2	9.8	9.5	11.2	7.7	11.9	15.4	14.6	23.6
XZ009	申扎县	2019-11-03 06:00:00	0	1.7	1.1	1	2.9	4	8.1	5.3	5.7	7.7	7.7	8.5	9.2	8.1	12.5	11.7	10.8	11.6	10.8	13.5	11.5	12.2	16.6	13.1	9.7	9.4	11.2	7.6	11.8	15.4	14.6	23.6
XZ009	申扎县	2019-11-03 07:00:00	0	1.1	1	1	2.9	3.9	8.1	5.2	5.7	7.7	7.7	8.5	9.2	8.1	12.5	11.6	10.8	11.5	10.8	13.5	11.5	12.2	16.6	13.1	9.7	9.4	11.1	7.6	11.8	15.4	14.5	23.5
XZ009	申扎县	2019-11-03 08:00:00	0	0.7	1	1	2.8	3.9	8.1	5.2	5.7	7.7	7.6	8.5	9.2	8	12.4	11.6	10.7	11.5	10.8	13.5	11.5	12.2	16.5	13.1	9.7	9.3	11.1	7.6	11.8	15.3	14.5	23.5
XZ009	申扎县	2019-11-03 09:00:00	0	0.5	0.9	1	2.8	3.9	8.1	5.2	5.7	7.7	7.6	8.4	9.1	8	12.4	11.5	10.7	11.5	10.8	13.4	11.4	12.1	16.5	13	9.6	9.3	11	7.5	11.7	15.3	14.5	23.5
XZ009	申扎县	2019-11-03 10:00:00	0	0.5	0.8	1	2.8	3.9	8	5.2	5.7	7.7	7.6	8.4	9.1	8	12.4	11.5	10.6	11.5	10.9	13.4	11.4	12.1	16.5	13	9.7	9.2	11	7.5	11.7	15.3	14.5	23.5
XZ009	申扎县	2019-11-03 11:00:00	0	0.6	0.7	1	2.8	3.8	8	5.2	5.7	7.7	7.6	8.4	9.1	8	12.3	11.5	10.6	11.5	10.8	13.4	11.4	12.1	16.4	13	9.6	9.2	11	7.5	11.7	15.2	14.4	23.4
XZ009	申扎县	2019-11-03 12:00:00	0.3	0.8	0.9	1.1	2.8	3.8	8	5.1	5.6	7.7	7.6	8.4	9.1	8	12.3	11.4	10.6	11.5	10.8	13.5	11.4	12.1	16.4	13	9.6	9.2	10.9	7.4	11.6	15.2	14.4	23.4
XZ009	申扎县	2019-11-03 13:00:00	2.2	1.3	1.3	1.1	2.9	3.8	7.9	5.1	5.6	7.6	7.6	8.4	9	7.9	12.3	11.5	10.6	11.4	10.7	13.3	11.3	12.1	16.3	13	9.5	9.2	10.9	7.4	11.5	15.2	14.4	23.4
XZ009	申扎县	2019-11-03 14:00:00	2.5	3.1	1.5	1.1	3	3.8	7.8	5.1	5.5	7.6	7.6	8.3	9	7.9	12.2	11.4	10.5	11.4	10.7	13.3	11.3	12	16.3	12.9	9.5	9.1	10.8	7.3	11.6	15.1	14.3	23.3
XZ009	申扎县	2019-11-03 15:00:00	2.5	3.1	1.6	1.3	3	3.9	7.8	5.1	5.5	7.6	7.6	8.3	9	7.9	12.2	11.4	10.5	11.4	10.7	13.3	11.3	12	16.3	12.9	9.5	9.1	10.8	7.3	11.5	15.1	14.3	23.3
XZ009	申扎县	2019-11-03 16:00:00	2.5	3.1	1.7	1.5	3.1	4	7.8	5.1	5.6	7.6	7.6	8.3	9	7.9	12.2	11.3	10.5	11.4	10.7	13.3	11.3	11.9	16.3	12.9	9.5	9	10.7	7.3	11.5	15.1	14.3	23.3
XZ009	申扎县	2019-11-03 17:00:00	2.4	3.1	1.8	1.5	3.1	4.1	7.8	5.2	5.6	7.6	7.6	8.2	9	7.8	12.1	11.3	10.4	11.3	10.6	13.2	11.2	11.9	16.2	12.8	9.4	9	10.7	7.3	11.5	15	14.3	23.2
XZ009	申扎县	2019-11-03 18:00:00	2.3	3.1	1.8	1.5	3.1	4.1	7.8	5.2	5.6	7.6	7.5	8.2	8.9	7.8	12.1	11.3	10.4	11.3	10.6	13.2	11.2	11.9	16.2	12.8	9.4	9	10.7	7.2	11.5	15	14.2	23.2
XZ009	申扎县	2019-11-03 20:00:00	2.1	2.9	1.7	1.5	3.1	4	7.7	5.3	5.6	7.6	7.6	8.2	8.9	7.8	12.1	11.2	10.4	11.2	10.5	13.1	11.2	11.9	16.1	12.7	9.3	9	10.6	7.2	11.4	15	14.2	23.2
XZ009	申扎县	2019-11-03 21:00:00	2	2.9	1.7	1.5	3.1	4	7.7	5.3	5.6	7.6	7.5	8.2	8.9	7.8	12	11.2	10.3	11.2	10.5	13.1	11.2	11.8	16.1	12.7	9.3	8.9	10.5	7.1	11.4	15	14.2	23.1
XZ009	申扎县	2019-11-03 22:00:00	1.9	2.8	1.7	1.4	3.1	4	7.7	5.2	5.5	7.6	7.5	8.2	8.9	7.8	12	11.2	10.3	11.1	10.5	13.1	11.1	11.8	16.1	12.7	9.2	8.9	10.5	7.1	11.3	15	14.1	23.2
XZ009	申扎县	2019-11-03 23:00:00	1.8	2.8	1.7	1.4	3	3.9	7.7	5.2	5.5	7.6	7.5	8.2	8.9	7.8	12	11.1	10.3	11.1	10.4	13.1	11.1	11.8	16.1	12.7	9.2	8.9	10.5	7.1	11.3	14.9	14.1	23.1
XZ009	申扎县	2019-11-04 00:00:00	1.7	2.8	1.7	1.4	3	3.9	7.6	5.2	5.5	7.5	7.5	8.2	8.8	7.7	12	11.1	10.3	11.1	10.4	13.1	11.1	11.8	16	12.7	9.2	8.8	10.4	7.1	11.3	14.9	14.1	23.1
XZ009	申扎县	2019-11-04 01:00:00	1.6	2.7	1.7	1.4	3	3.9	7.6	5.1	5.5	7.5	7.5	8.1	8.8	7.7	11.9	11.1	10.3	11.1	10.4	13.1	11.1	11.8	16	12.6	9.1	8.8	10.4	7	11.2	14.9	14	23
XZ009	申扎县	2019-11-04 02:00:00	1.6	2.7	1.7	1.3	3	3.8	7.6	5.1	5.4	7.5	7.4	8.1	8.8	7.7	11.9	11.1	10.2	11.1	10.4	13	11.1	11.8	16	12.6	9.1	8.8	10.4	7	11.2	14.9	14	23
XZ009	申扎县	2019-11-04 03:00:00	1.5	2.7	1.7	1.3	3	3.8	7.6	5.1	5.4	7.5	7.4	8.1	8.8	7.7	11.9	11	10.2	11	10.4	13	11.1	11.8	15.9	12.6	9.2	8.7	10.3	7	11.2	14.8	14	23
XZ009	申扎县	2019-11-04 04:00:00	1.3	2.6	1.6	1.3	3	3.8	7.6	5.1	5.4	7.5	7.4	8.1	8.7	7.7	11.9	11	10.2	11	10.3	13	11	11.7	15.9	12.6	9.1	8.7	10.3	6.9	11.2	14.8	14	23
XZ009	申扎县	2019-11-04 05:00:00	1	2.5	1.6	1.3	2.9	3.7	7.6	5	5.4	7.4	7.4	8	8.7	7.7	11.8	11	10.2	11	10.3	13	11	11.7	15.9	12.5	9.1	8.7	10.3	6.9	11.2	14.8	14	23
XZ009	申扎县	2019-11-04 06:00:00	0.4	2.3	1.4	1.3	2.9	3.7	7.6	5	5.4	7.4	7.4	8	8.7	7.6	11.8	11	10.1	11	10.3	13	11	11.7	15.8	12.5	9	8.7	10.2	6.9	11.1	14.8	13.9	22.9
XZ009	申扎县	2019-11-04 07:00:00	0.1	2.1	1.3	1.3	2.9	3.7	7.5	5	5.4	7.4	7.3	8	8.7	7.6	11.7	10.9	10.1	10.9	10.2	12.9	11	11.7	15.9	12.5	9	8.7	10.2	6.9	11.2	14.8	13.9	22.9
XZ009	申扎县	2019-11-04 08:00:00	0	1.9	1.2	1.3	2.9	3.6	7.5	4.9	5.4	7.3	7.3	8	8.7	7.6	11.7	10.9	10.1	10.9	10.2	12.9	11	11.6	15.9	12.5	9	8.6	10.2	6.9	11.1	14.7	13.9	22.9
XZ009	申扎县	2019-11-04 09:00:00	0	1.8	1.2	1.3	2.9	3.6	7.5	4.9	5.3	7.3	7.3	8	8.6	7.6	11.7	10.9	10.1	10.8	10.2	12.9	11	11.6	15.8	12.5	9	8.6	10.2	6.8	11.1	14.7	13.9	22.9
XZ009	申扎县	2019-11-04 10:00:00	0	1.7	1.2	1.3	2.9	3.6	7.5	4.9	5.3	7.3	7.3	8	8.6	7.6	11.7	10.8	10	10.9	10.4	12.9	10.9	11.6	15.8	12.5	9	8.6	10.1	6.8	11.1	14.7	13.8	22.9
XZ009	申扎县	2019-11-04 11:00:00	0.2	1.8	1.3	1.3	2.9	3.6	7.5	4.9	5.3	7.3	7.3	7.9	8.6	7.5	11.7	10.8	10	10.8	10.3	12.9	10.9	11.6	15.7	12.4	9	8.6	10.1	6.8	11.1	14.7	13.8	22.8
XZ009	申扎县	2019-11-04 12:00:00	0.6	2	1.4	1.3	2.9	3.6	7.4	4.8	5.3	7.3	7.2	7.9	8.5	7.5	11.6	10.8	10	10.8	10.3	12.8	10.9	11.6	15.7	12.5	8.9	8.6	10.1	6.8	11	14.6	13.8	22.8
XZ009	申扎县	2019-11-04 13:00:00	1.4	2.3	1.6	1.3	2.9	3.6	7.4	4.9	5.2	7.3	7.2	7.9	8.6	7.5	11.6	10.8	10	10.8	10.3	12.8	10.9	11.6	15.7	12.4	8.9	8.5	10	6.8	11	14.6	13.8	22.8
XZ009	申扎县	2019-11-04 14:00:00	2	2.6	1.8	1.4	3	3.6	7.4	4.9	5.3	7.3	7.2	7.9	8.6	7.5	11.6	10.7	9.9	10.8	10.3	12.8	10.8	11.5	15.7	12.4	8.9	8.5	10	6.7	11	14.6	13.8	22.8
XZ009	申扎县	2019-11-04 15:00:00	2	2.7	1.8	1.6	3	3.6	7.3	4.9	5.3	7.2	7.2	7.9	8.5	7.5	11.6	10.7	9.9	10.8	10.2	12.8	10.8	11.5	15.6	12.4	8.9	8.5	10	6.7	11	14.6	13.8	22.8
XZ009	申扎县	2019-11-04 16:00:00	2	2.7	1.9	1.7	3	3.7	7.3	4.9	5.3	7.2	7.2	7.8	8.5	7.5	11.6	10.7	9.9	10.8	10.2	12.8	10.9	11.5	15.6	12.4	8.9	8.5	10	6.7	11	14.6	13.7	22.7
XZ009	申扎县	2019-11-04 17:00:00	2	2.7	1.9	1.7	3	3.8	7.3	4.9	5.3	7.2	7.2	7.8	8.5	7.5	11.5	10.7	9.9	10.8	10.2	12.8	10.8	11.5	15.6	12.3	8.8	8.4	10	6.7	11	14.6	13.7	22.7
XZ009	申扎县	2019-11-04 18:00:00	1.9	2.7	1.9	1.8	3	3.8	7.3	5	5.3	7.3	7.2	7.8	8.5	7.5	11.5	10.7	9.9	10.7	10.2	12.7	10.8	11.5	15.6	12.3	8.8	8.4	9.9	6.6	10.9	14.6	13.7	22.7
XZ009	申扎县	2019-11-04 19:00:00	1.8	2.7	1.8	1.8	3	3.8	7.3	5	5.3	7.3	7.2	7.8	8.5	7.4	11.5	10.7	9.9	10.7	10.1	12.7	10.8	11.4	15.5	12.3	8.8	8.4	9.9	6.6	10.9	14.5	13.7	22.7
XZ009	申扎县	2019-11-04 20:00:00	1.6	2.6	1.8	1.7	3	3.8	7.3	5	5.3	7.3	7.2	7.8	8.5	7.4	11.5	10.6	9.8	10.7	10.1	12.7	10.8	11.5	15.5	12.3	8.7	8.3	9.9	6.6	10.9	14.5	13.7	22.7
XZ009	申扎县	2019-11-04 21:00:00	1.5	2.6	1.8	1.7	3	3.7	7.3	5	5.3	7.3	7.2	7.8	8.5	7.4	11.5	10.6	9.8	10.6	10.1	12.7	10.7	11.4	15.5	12.3	8.7	8.3	9.8	6.6	10.9	14.5	13.7	22.6
XZ009	申扎县	2019-11-04 22:00:00	1.5	2.6	1.7	1.6	3	3.7	7.2	5	5.3	7.2	7.2	7.8	8.5	7.4	11.5	10.7	9.8	10.6	10.1	12.7	10.7	11.4	15.5	12.2	8.7	8.3	9.8	6.6	10.8	14.5	13.6	22.6
XZ009	申扎县	2019-11-04 23:00:00	1.4	2.5	1.7	1.6	3	3.7	7.2	4.9	5.3	7.2	7.2	7.8	8.4	7.4	11.5	10.6	9.8	10.6	10	12.7	10.7	11.4	15.5	12.2	8.7	8.3	9.8	6.5	10.8	14.5	13.6	22.6
XZ009	申扎县	2019-11-05 00:00:00	1.4	2.5	1.7	1.6	3	3.6	7.2	4.9	5.2	7.2	7.1	7.8	8.4	7.4	11.4	10.6	9.8	10.6	10	12.7	10.7	11.4	15.4	12.2	8.7	8.3	9.8	6.5	10.8	14.5	13.6	22.6
XZ009	申扎县	2019-11-05 01:00:00	1.3	2.5	1.7	1.6	2.9	3.6	7.2	4.9	5.2	7.2	7.1	7.8	8.4	7.4	11.4	10.5	9.8	10.6	10	12.6	10.7	11.4	15.4	12.2	8.6	8.3	9.7	6.5	10.8	14.5	13.6	22.6
XZ009	申扎县	2019-11-05 02:00:00	1.2	2.5	1.7	1.5	2.9	3.6	7.1	4.9	5.2	7.2	7.1	7.7	8.4	7.4	11.4	10.5	9.8	10.6	10.1	12.6	10.7	11.4	15.4	12.2	8.6	8.3	9.7	6.5	10.8	14.4	13.5	22.6
XZ009	申扎县	2019-11-05 03:00:00	1.1	2.4	1.7	1.5	2.9	3.6	7.2	4.8	5.2	7.2	7.1	7.7	8.4	7.4	11.4	10.5	9.7	10.6	10	12.6	10.7	11.4	15.4	12.2	8.6	8.2	9.7	6.5	10.8	14.5	13.6	22.6
XZ009	申扎县	2019-11-05 04:00:00	0.9	2.4	1.6	1.5	2.9	3.5	7.2	4.8	5.2	7.1	7.1	7.7	8.4	7.3	11.3	10.5	9.7	10.5	10	12.6	10.7	11.4	15.4	12.2	8.6	8.2	9.7	6.5	10.8	14.4	13.5	22.5
XZ009	申扎县	2019-11-05 05:00:00	0.5	2.2	1.5	1.5	2.9	3.5	7.2	4.8	5.2	7.1	7	7.7	8.4	7.3	11.3	10.4	9.7	10.5	10	12.6	10.7	11.3	15.4	12.2	8.6	8.2	9.7	6.5	10.8	14.4	13.5	22.5
XZ009	申扎县	2019-11-05 06:00:00	0.1	2	1.4	1.5	2.8	3.5	7.2	4.8	5.2	7.1	7	7.7	8.3	7.3	11.3	10.4	9.6	10.5	9.9	12.6	10.6	11.4	15.3	12.1	8.5	8.2	9.6	6.4	10.7	14.4	13.5	22.5
XZ009	申扎县	2019-11-05 07:00:00	0	1.8	1.2	1.5	2.8	3.5	7.2	4.8	5.2	7.1	7	7.7	8.3	7.3	11.3	10.4	9.7	10.4	9.9	12.5	10.6	11.3	15.3	12.1	8.5	8.2	9.6	6.4	10.7	14.4	13.5	22.5
XZ009	申扎县	2019-11-05 08:00:00	0	1.4	1.2	1.5	2.8	3.5	7.2	4.7	5.2	7.1	7	7.6	8.3	7.3	11.3	10.4	9.6	10.4	9.9	12.5	10.6	11.2	15.2	12.1	8.5	8.1	9.6	6.4	10.7	14.4	13.5	22.5
XZ009	申扎县	2019-11-05 09:00:00	0	0.9	1.2	1.4	2.8	3.4	7.2	4.7	5.2	7.1	7	7.6	8.3	7.3	11.3	10.4	9.6	10.4	9.9	12.5	10.6	11.3	15.3	12.1	8.5	8.1	9.6	6.4	10.7	14.4	13.5	22.5
XZ009	申扎县	2019-11-05 10:00:00	0	0.7	1.2	1.5	2.8	3.4	7.2	4.7	5.2	7.1	7	7.6	8.3	7.2	11.2	10.4	9.6	10.5	10	12.5	10.6	11.2	15.3	12	8.5	8.1	9.5	6.4	10.7	14.3	13.4	22.5
XZ009	申扎县	2019-11-05 11:00:00	0	0.8	1.2	1.5	2.8	3.4	7.2	4.7	5.1	7.1	7	7.6	8.3	7.2	11.2	10.3	9.6	10.4	10	12.5	10.5	11.2	15.2	12.1	8.5	8.1	9.5	6.4	10.6	14.3	13.4	22.4
XZ009	申扎县	2019-11-05 12:00:00	0.1	1	1.2	1.4	2.8	3.4	7.1	4.7	5.1	7	7	7.6	8.2	7.2	11.2	10.4	9.6	10.4	9.9	12.5	10.6	11.2	15.2	12	8.5	8.1	9.5	6.4	10.7	14.3	13.3	22.4
XZ009	申扎县	2019-11-05 13:00:00	0.6	1.4	1.4	1.5	2.8	3.4	7	4.6	5.1	7	7	7.6	8.2	7.2	11.2	10.3	9.6	10.4	10	12.5	10.6	11.2	15.2	12	8.5	8.1	9.5	6.3	10.7	14.3	13.4	22.4
XZ009	申扎县	2019-11-05 14:00:00	1.5	2.5	1.7	1.5	2.9	3.4	7	4.6	5.1	7	6.9	7.5	8.2	7.2	11.2	10.3	9.5	10.4	9.9	12.5	10.5	11.2	15.2	12	8.5	8.1	9.5	6.3	10.6	14.3	13.4	22.4
XZ009	申扎县	2019-11-05 15:00:00	1.6	2.6	1.7	1.7	2.9	3.4	7	4.6	5.1	7	6.9	7.6	8.2	7.2	11.2	10.3	9.5	10.4	9.9	12.4	10.5	11.2	15.2	12	8.4	8.1	9.4	6.3	10.6	14.2	13.4	22.4
XZ009	申扎县	2019-11-05 16:00:00	1.7	2.7	1.8	1.8	3	3.5	7	4.7	5.1	7	6.9	7.6	8.2	7.2	11.2	10.3	9.5	10.4	9.9	12.4	10.5	11.2	15.2	12	8.4	8	9.4	6.3	10.6	14.2	13.4	22.3
XZ009	申扎县	2019-11-05 17:00:00	1.7	2.7	1.8	1.9	3	3.6	7	4.7	5.1	7	6.9	7.6	8.2	7.2	11.2	10.3	9.5	10.4	9.9	12.4	10.5	11.1	15.1	12	8.4	8	9.4	6.3	10.6	14.2	13.4	22.3
XZ009	申扎县	2019-11-05 18:00:00	1.7	2.7	1.8	1.9	3	3.6	7	4.8	5.1	7	6.9	7.5	8.2	7.2	11.1	10.2	9.5	10.4	9.9	12.4	10.5	11.1	15.1	12	8.4	8	9.4	6.3	10.6	14.2	13.3	22.3
XZ009	申扎县	2019-11-05 19:00:00	1.6	2.6	1.8	1.9	3	3.6	6.9	4.8	5.1	7	6.9	7.5	8.2	7.2	11.1	10.2	9.5	10.3	9.8	12.4	10.5	11.1	15.2	11.9	8.4	8	9.4	6.3	10.6	14.2	13.3	22.3
XZ009	申扎县	2019-11-05 20:00:00	1.4	2.5	1.8	1.9	3	3.6	6.9	4.8	5.1	7	6.9	7.5	8.2	7.2	11.1	10.2	9.5	10.3	9.8	12.4	10.5	11.1	15.1	11.9	8.4	8	9.4	6.2	10.5	14.2	13.3	22.3
XZ009	申扎县	2019-11-05 21:00:00	1.2	2.5	1.7	1.8	2.9	3.6	6.9	4.8	5.1	7	6.9	7.5	8.2	7.2	11.1	10.2	9.5	10.2	9.8	12.4	10.5	11.1	15	11.9	8.3	7.9	9.4	6.2	10.5	14.2	13.3	22.3
XZ009	申扎县	2019-11-05 22:00:00	1.1	2.4	1.7	1.7	2.9	3.6	6.9	4.8	5.1	7	6.9	7.5	8.1	7.2	11.1	10.2	9.5	10.3	9.7	12.3	10.5	11.1	15.1	11.9	8.3	7.9	9.3	6.2	10.6	14.2	13.3	22.3
XZ009	申扎县	2019-11-05 23:00:00	0.8	2.3	1.6	1.7	2.9	3.5	6.9	4.8	5.1	7	6.9	7.5	8.1	7.2	11	10.1	9.4	10.3	9.7	12.3	10.4	11.1	15	11.9	8.3	7.9	9.3	6.2	10.5	14.2	13.3	22.3
XZ009	申扎县	2019-11-06 00:00:00	0.3	2.1	1.4	1.6	2.8	3.5	6.9	4.7	5.1	7	6.9	7.5	8.1	7.1	11	10.1	9.4	10.2	9.7	12.3	10.4	11.1	15	11.9	8.3	7.9	9.3	6.2	10.5	14.2	13.2	22.2
XZ009	申扎县	2019-11-06 01:00:00	0	1.9	1.3	1.6	2.8	3.4	7	4.7	5.1	7	6.9	7.5	8.1	7.1	11	10.1	9.4	10.2	9.7	12.3	10.4	11	15	11.9	8.2	7.9	9.3	6.2	10.5	14.2	13.2	22.3
XZ009	申扎县	2019-11-06 02:00:00	0	1.5	1.2	1.6	2.7	3.4	6.9	4.7	5	6.9	6.8	7.5	8.1	7.1	11	10.1	9.4	10.2	9.7	12.3	10.4	11	15	11.8	8.3	7.9	9.2	6.1	10.5	14.1	13.2	22.2
XZ009	申扎县	2019-11-06 03:00:00	0	0.9	1.1	1.5	2.7	3.4	6.9	4.6	5	6.9	6.8	7.5	8.1	7.1	11	10.1	9.4	10.2	9.7	12.3	10.3	11	15	11.8	8.2	7.9	9.2	6.1	10.5	14.2	13.2	22.2
XZ009	申扎县	2019-11-06 04:00:00	0	0.5	1.2	1.5	2.7	3.3	7	4.6	5	6.9	6.8	7.4	8.1	7.1	11	10.1	9.4	10.1	9.7	12.3	10.4	11	15	11.8	8.2	7.8	9.2	6.1	10.5	14.1	13.2	22.2
XZ009	申扎县	2019-11-06 05:00:00	0	0.4	1	1.6	2.7	3.4	7	4.6	5	6.9	6.8	7.4	8.1	7.1	11	10.1	9.4	10.1	9.7	12.2	10.4	11	14.9	11.8	8.2	7.8	9.2	6.1	10.4	14.1	13.2	22.2
XZ009	申扎县	2019-11-06 06:00:00	0	0.3	0.6	1.5	2.6	3.3	7	4.5	5	6.9	6.8	7.4	8	7.1	11	10	9.4	10.1	9.6	12.3	10.3	11	14.9	11.8	8.2	7.8	9.2	6.1	10.4	14.1	13.2	22.2
XZ009	申扎县	2019-11-06 07:00:00	0	0.2	0.4	1.4	2.6	3.3	7	4.6	5	6.9	6.8	7.4	8	7.1	10.9	10	9.4	10.1	9.7	12.2	10.3	11	14.9	11.8	8.2	7.8	9.2	6.1	10.4	14.1	13.2	22.2
XZ009	申扎县	2019-11-06 08:00:00	0	0.2	0.2	1.2	2.5	3.3	7	4.5	5	6.9	6.7	7.4	8	7.1	10.9	10	9.3	10.1	9.6	12.3	10.3	11	14.9	11.8	8.1	7.8	9.1	6.1	10.4	14.1	13.2	22.2
XZ009	申扎县	2019-11-06 09:00:00	0	0.2	0.2	1	2.5	3.3	7	4.5	5	6.9	6.7	7.4	8	7.1	10.9	10	9.3	10.1	9.7	12.2	10.3	10.9	14.9	11.7	8.2	7.7	9.1	6.1	10.4	14.1	13.1	22.1
XZ009	申扎县	2019-11-06 10:00:00	0	0.2	0.1	0.6	2.4	3.2	7	4.5	5	6.9	6.7	7.4	8	7	10.9	10	9.3	10.1	9.8	12.2	10.3	10.9	14.8	11.7	8.2	7.8	9.1	6	10.4	14.1	13.1	22.1
XZ009	申扎县	2019-11-06 11:00:00	0	0.3	0.2	0.4	2.4	3.2	7	4.5	5	6.9	6.7	7.4	7.9	7	10.9	10	9.3	10.1	9.7	12.2	10.3	11	14.9	11.7	8.2	7.7	9.1	6	10.3	14.1	13	22.1
XZ009	申扎县	2019-11-06 12:00:00	0	0.4	0.2	0.5	2.4	3.2	7	4.5	5	6.9	6.7	7.4	7.9	7	10.9	10	9.3	10.1	9.7	12.2	10.3	10.9	14.9	11.7	8.1	7.8	9.1	6	10.4	14	13.1	22.1
XZ009	申扎县	2019-11-06 13:00:00	0.8	0.6	0.4	0.6	2.5	3.2	7	4.5	5	6.8	6.7	7.3	7.9	7	10.9	10	9.3	10.1	9.7	12.2	10.3	10.9	14.8	11.7	8.1	7.7	9	6	10.3	14	13.1	22.1
XZ009	申扎县	2019-11-06 14:00:00	1.5	2.4	0.6	0.8	2.6	3.1	6.9	4.4	4.9	6.8	6.7	7.3	8	7	10.9	10	9.2	10.1	9.7	12.2	10.3	10.9	14.8	11.7	8.1	7.7	9.1	6	10.3	14	13.1	22.1
XZ009	申扎县	2019-11-06 15:00:00	1.6	2.7	1.6	1.2	2.7	3.1	6.8	4.4	4.9	6.8	6.7	7.3	7.9	7	10.9	10	9.3	10.1	9.7	12.2	10.3	10.9	14.8	11.7	8.1	7.7	9.1	6	10.3	14	13.1	22
XZ009	申扎县	2019-11-06 16:00:00	1.7	2.7	1.9	1.7	2.8	3.2	6.7	4.4	4.9	6.8	6.7	7.3	7.9	7	10.9	10	9.3	10.1	9.7	12.2	10.3	10.9	14.8	11.7	8.1	7.7	9.1	6	10.3	14	13.1	22
XZ009	申扎县	2019-11-06 17:00:00	1.7	2.8	2	1.9	2.8	3.4	6.7	4.5	4.9	6.9	6.7	7.3	7.9	7	10.9	10	9.2	10.1	9.7	12.2	10.3	10.9	14.8	11.7	8.1	7.7	9	6	10.3	14	13	22
XZ009	申扎县	2019-11-06 18:00:00	1.7	2.7	2	1.9	2.9	3.4	6.7	4.6	4.9	6.8	6.7	7.3	7.9	7	10.8	10	9.2	10.1	9.7	12.1	10.2	10.9	14.8	11.7	8.1	7.7	9	6	10.3	13.9	13	22
XZ009	申扎县	2019-11-06 19:00:00	1.6	2.7	2	1.9	2.9	3.5	6.6	4.6	4.9	6.9	6.7	7.3	7.9	7	10.8	10	9.2	10	9.6	12.1	10.2	10.9	14.7	11.7	8.1	7.7	9	6	10.3	13.9	13	22
XZ009	申扎县	2019-11-06 20:00:00	1.4	2.6	1.9	1.9	2.9	3.5	6.7	4.6	5	6.8	6.7	7.3	7.9	7	10.8	9.9	9.2	10	9.5	12.1	10.2	10.8	14.8	11.6	8.1	7.7	9	6	10.3	13.9	13	22
XZ009	申扎县	2019-11-06 21:00:00	1.2	2.5	1.8	1.8	2.8	3.4	6.6	4.6	5	6.8	6.7	7.3	7.9	7	10.8	9.9	9.2	10	9.5	12.1	10.2	10.8	14.7	11.6	8.1	7.7	9	5.9	10.3	13.9	13	22
XZ009	申扎县	2019-11-06 22:00:00	1.1	2.5	1.8	1.8	2.8	3.4	6.6	4.6	4.9	6.8	6.7	7.3	7.9	7	10.8	9.9	9.2	10	9.5	12.1	10.2	10.8	14.7	11.6	8	7.6	8.9	5.9	10.2	13.9	13	22
XZ009	申扎县	2019-11-06 23:00:00	0.9	2.4	1.7	1.7	2.8	3.3	6.7	4.6	4.9	6.8	6.7	7.3	7.9	7	10.8	10	9.2	10	9.5	12.1	10.2	10.8	14.7	11.6	8	7.6	8.9	5.9	10.3	13.9	13	22
XZ009	申扎县	2019-11-07 00:00:00	0.5	2.3	1.6	1.7	2.8	3.3	6.6	4.6	4.9	6.9	6.7	7.3	7.9	6.9	10.8	9.9	9.2	10	9.5	12.1	10.2	10.8	14.7	11.6	8	7.6	8.9	5.9	10.2	13.9	13	22
XZ009	申扎县	2019-11-07 01:00:00	0.1	2	1.4	1.6	2.7	3.3	6.7	4.5	4.9	6.8	6.7	7.3	7.9	6.9	10.8	9.9	9.1	9.9	9.5	12.1	10.2	10.8	14.7	11.6	8	7.6	8.9	5.9	10.2	13.9	13	22
XZ009	申扎县	2019-11-07 02:00:00	0	1.7	1.3	1.6	2.7	3.3	6.7	4.5	4.9	6.8	6.7	7.3	7.9	6.9	10.8	9.8	9.1	9.9	9.5	12	10.2	10.8	14.6	11.6	8	7.6	8.9	5.9	10.2	13.9	12.9	22
XZ009	申扎县	2019-11-07 03:00:00	0	1.2	1.2	1.6	2.6	3.2	6.7	4.5	4.9	6.8	6.7	7.3	7.9	6.9	10.8	9.8	9.2	9.9	9.5	12	10.2	10.8	14.6	11.5	8	7.6	8.9	5.9	10.2	13.9	12.9	21.9
XZ009	申扎县	2019-11-07 04:00:00	0	0.7	1.3	1.6	2.6	3.2	6.7	4.5	4.9	6.8	6.6	7.2	7.9	6.9	10.7	9.8	9.1	9.9	9.5	12	10.2	10.7	14.6	11.6	7.9	7.6	8.9	5.9	10.2	13.9	12.9	21.9
XZ009	申扎县	2019-11-07 05:00:00	0	0.5	1.2	1.6	2.6	3.2	6.7	4.5	4.9	6.8	6.6	7.2	7.8	6.9	10.7	9.8	9.1	9.9	9.4	12	10.1	10.7	14.6	11.5	7.9	7.6	8.8	5.9	10.2	13.9	12.9	21.9
XZ009	申扎县	2019-11-07 06:00:00	0	0.4	0.9	1.6	2.6	3.2	6.7	4.5	4.9	6.8	6.6	7.2	7.8	6.9	10.7	9.8	9.1	9.9	9.4	12	10.1	10.7	14.6	11.5	7.9	7.5	8.8	5.9	10.2	13.8	12.9	21.9
XZ009	申扎县	2019-11-07 07:00:00	0	0.3	0.6	1.5	2.5	3.1	6.7	4.4	4.9	6.8	6.6	7.2	7.8	6.9	10.7	9.8	9.1	9.9	9.4	12	10.1	10.7	14.6	11.5	7.9	7.5	8.8	5.9	10.2	13.9	12.9	21.9
XZ009	申扎县	2019-11-07 08:00:00	0	0.3	0.4	1.4	2.5	3.1	6.7	4.4	4.9	6.7	6.6	7.2	7.8	6.9	10.7	9.8	9.1	9.8	9.4	12	10.1	10.7	14.6	11.5	7.9	7.5	8.8	5.8	10.1	13.8	12.9	21.9
XZ009	申扎县	2019-11-07 09:00:00	0	0.3	0.3	1.3	2.5	3.1	6.8	4.4	4.9	6.7	6.6	7.2	7.8	6.9	10.7	9.7	9.1	9.8	9.4	12	10.1	10.7	14.5	11.5	7.9	7.5	8.8	5.8	10.1	13.9	12.9	21.9
XZ009	申扎县	2019-11-07 10:00:00	0	0.3	0.3	1.1	2.4	3.1	6.8	4.4	4.9	6.7	6.6	7.2	7.8	6.9	10.7	9.7	9	9.9	9.6	11.9	10.1	10.7	14.5	11.5	7.9	7.5	8.8	5.8	10.1	13.8	12.9	21.9
XZ009	申扎县	2019-11-07 11:00:00	0	0.4	0.3	1.1	2.4	3.1	6.7	4.3	4.9	6.7	6.6	7.2	7.8	6.9	10.6	9.7	9	9.8	9.5	12	10.1	10.7	14.5	11.5	7.9	7.5	8.8	5.8	10.1	13.8	12.8	21.9
XZ009	申扎县	2019-11-07 12:00:00	0.1	0.6	0.4	1.1	2.5	3.1	6.7	4.3	4.9	6.7	6.6	7.2	7.8	6.8	10.6	9.7	9	9.8	9.5	12	10.1	10.7	14.5	11.5	7.9	7.5	8.8	5.8	10.1	13.8	12.8	21.8
XZ009	申扎县	2019-11-07 13:00:00	1.4	1.1	0.6	1.1	2.5	3.1	6.6	4.3	4.8	6.7	6.6	7.1	7.8	6.8	10.7	9.7	9.1	9.9	9.5	12	10.1	10.7	14.5	11.5	7.9	7.5	8.8	5.8	10.1	13.8	12.8	21.8
XZ009	申扎县	2019-11-07 14:00:00	1.4	2.7	1.1	1.3	2.6	3	6.5	4.3	4.8	6.7	6.6	7.1	7.7	6.8	10.6	9.7	9	9.9	9.5	11.9	10.1	10.7	14.5	11.4	7.9	7.5	8.7	5.8	10.1	13.8	12.8	21.8
XZ009	申扎县	2019-11-07 15:00:00	1.5	2.6	1.9	1.5	2.7	3	6.4	4.3	4.8	6.6	6.5	7.1	7.7	6.8	10.6	9.7	9	9.9	9.5	11.9	10.1	10.6	14.5	11.4	7.9	7.5	8.8	5.8	10.1	13.8	12.8	21.8
XZ009	申扎县	2019-11-07 16:00:00	1.5	2.7	2	1.7	2.8	3.1	6.4	4.3	4.8	6.6	6.5	7.1	7.7	6.8	10.5	9.7	9	9.8	9.5	11.9	10.1	10.6	14.5	11.4	7.9	7.5	8.7	5.8	10.1	13.8	12.8	21.8
XZ009	申扎县	2019-11-07 17:00:00	1.5	2.7	2	1.8	2.8	3.2	6.4	4.4	4.8	6.7	6.6	7.1	7.7	6.8	10.6	9.7	9	9.8	9.4	11.9	10.1	10.6	14.5	11.4	7.9	7.5	8.7	5.8	10.1	13.8	12.8	21.8
XZ009	申扎县	2019-11-07 18:00:00	1.5	2.7	2	1.8	2.8	3.3	6.4	4.4	4.8	6.7	6.6	7.1	7.7	6.7	10.6	9.7	9	9.8	9.4	11.9	10	10.6	14.5	11.4	7.8	7.4	8.7	5.8	10.1	13.7	12.8	21.8
XZ009	申扎县	2019-11-07 19:00:00	1.4	2.6	2	1.9	2.8	3.3	6.4	4.5	4.8	6.7	6.6	7.1	7.7	6.8	10.6	9.7	8.9	9.8	9.4	11.9	10	10.6	14.5	11.4	7.8	7.4	8.7	5.8	10.1	13.7	12.8	21.7
XZ009	申扎县	2019-11-07 20:00:00	1.3	2.6	1.9	1.8	2.8	3.3	6.4	4.5	4.8	6.7	6.6	7.1	7.7	6.8	10.6	9.7	9	9.8	9.4	11.9	10	10.6	14.4	11.4	7.8	7.4	8.7	5.7	10	13.7	12.8	21.7
XZ009	申扎县	2019-11-07 23:00:00	1.1	2.4	1.8	1.8	2.8	3.3	6.4	4.5	4.8	6.7	6.6	7.1	7.7	6.8	10.5	9.7	9	9.7	9.3	11.8	10	10.6	14.4	11.4	7.8	7.4	8.7	5.7	10	13.7	12.8	21.7
XZ009	申扎县	2019-11-08 00:00:00	1	2.4	1.8	1.7	2.7	3.3	6.4	4.5	4.8	6.7	6.6	7.1	7.7	6.8	10.5	9.7	9	9.8	9.3	11.8	10	10.6	14.4	11.3	7.8	7.4	8.6	5.7	10	13.7	12.8	21.7
XZ009	申扎县	2019-11-08 01:00:00	1	2.4	1.8	1.7	2.7	3.2	6.4	4.4	4.8	6.7	6.5	7.1	7.7	6.8	10.5	9.6	8.9	9.8	9.3	11.8	10	10.6	14.4	11.3	7.8	7.4	8.6	5.7	10	13.7	12.7	21.7
XZ009	申扎县	2019-11-08 02:00:00	0.9	2.4	1.7	1.6	2.7	3.2	6.4	4.4	4.8	6.7	6.5	7.1	7.7	6.8	10.5	9.6	8.9	9.7	9.3	11.8	10	10.6	14.4	11.3	7.8	7.4	8.6	5.7	10	13.7	12.7	21.7
XZ009	申扎县	2019-11-08 03:00:00	0.7	2.3	1.7	1.6	2.7	3.1	6.4	4.4	4.8	6.6	6.5	7.1	7.7	6.8	10.5	9.6	9	9.7	9.3	11.8	10	10.6	14.4	11.3	7.7	7.4	8.6	5.7	10	13.6	12.7	21.7
XZ009	申扎县	2019-11-08 04:00:00	0.4	2.2	1.6	1.6	2.7	3.1	6.4	4.4	4.8	6.6	6.5	7.1	7.7	6.7	10.5	9.6	8.9	9.7	9.3	11.8	10	10.6	14.3	11.3	7.7	7.3	8.6	5.7	10	13.7	12.7	21.7
XZ009	申扎县	2019-11-08 05:00:00	0.1	2	1.4	1.6	2.7	3.1	6.4	4.3	4.8	6.6	6.5	7.1	7.7	6.8	10.5	9.6	8.9	9.7	9.3	11.8	10	10.6	14.3	11.3	7.7	7.3	8.6	5.7	10	13.6	12.7	21.7
XZ009	申扎县	2019-11-08 06:00:00	0	1.8	1.3	1.6	2.6	3.1	6.4	4.4	4.8	6.6	6.5	7.1	7.7	6.7	10.5	9.6	8.9	9.7	9.3	11.8	10	10.6	14.3	11.3	7.7	7.3	8.5	5.7	10	13.7	12.7	21.6
XZ009	申扎县	2019-11-08 07:00:00	0	1.5	1.3	1.5	2.6	3.1	6.4	4.4	4.8	6.6	6.5	7	7.7	6.7	10.5	9.6	8.9	9.7	9.3	11.8	10	10.5	14.3	11.3	7.7	7.4	8.5	5.7	9.9	13.7	12.7	21.7
XZ009	申扎县	2019-11-08 08:00:00	0	0.9	1.3	1.5	2.6	3.1	6.4	4.3	4.8	6.6	6.5	7.1	7.7	6.7	10.5	9.5	8.9	9.7	9.3	11.8	10	10.5	14.3	11.3	7.7	7.3	8.5	5.7	10	13.6	12.7	21.7
XZ009	申扎县	2019-11-08 09:00:00	0	0.6	1.3	1.6	2.6	3.1	6.5	4.3	4.8	6.6	6.5	7	7.6	6.7	10.5	9.5	8.9	9.7	9.3	11.8	10	10.5	14.3	11.3	7.7	7.3	8.5	5.6	10	13.6	12.7	21.6
XZ009	申扎县	2019-11-08 10:00:00	0	0.6	1.2	1.6	2.6	3	6.5	4.3	4.8	6.6	6.5	7	7.6	6.7	10.5	9.5	8.8	9.7	9.4	11.8	9.9	10.5	14.3	11.2	7.7	7.3	8.5	5.6	10	13.6	12.6	21.6
XZ009	申扎县	2019-11-08 11:00:00	0	0.7	1.1	1.6	2.6	3	6.4	4.3	4.8	6.6	6.4	7	7.6	6.7	10.4	9.5	8.9	9.7	9.3	11.8	9.9	10.5	14.3	11.3	7.7	7.3	8.5	5.6	9.9	13.6	12.7	21.6
XZ009	申扎县	2019-11-08 12:00:00	0.2	0.9	1.3	1.6	2.6	3	6.4	4.3	4.7	6.6	6.5	7	7.6	6.7	10.4	9.5	8.9	9.7	9.3	11.8	9.9	10.5	14.3	11.3	7.7	7.3	8.5	5.6	9.9	13.6	12.7	21.6
XZ009	申扎县	2019-11-08 13:00:00	1.2	1.9	1.6	1.6	2.7	3	6.3	4.3	4.7	6.6	6.4	7	7.6	6.7	10.4	9.5	8.9	9.7	9.3	11.8	9.9	10.5	14.2	11.2	7.7	7.3	8.5	5.6	9.9	13.6	12.6	21.6
XZ009	申扎县	2019-11-08 14:00:00	1.4	2.6	1.8	1.7	2.7	3	6.2	4.2	4.7	6.6	6.4	7	7.6	6.7	10.4	9.5	8.8	9.7	9.3	11.8	9.9	10.5	14.2	11.2	7.7	7.3	8.5	5.6	9.9	13.6	12.6	21.6
XZ009	申扎县	2019-11-08 15:00:00	1.5	2.7	1.9	1.9	2.8	3.2	6.2	4.3	4.7	6.6	6.4	7	7.6	6.7	10.4	9.5	8.8	9.7	9.3	11.7	9.9	10.5	14.2	11.2	7.7	7.3	8.5	5.6	9.9	13.6	12.6	21.6
XZ009	申扎县	2019-11-08 16:00:00	1.6	2.7	1.9	2	2.8	3.3	6.2	4.4	4.7	6.6	6.4	7	7.6	6.7	10.4	9.5	8.8	9.7	9.3	11.7	9.9	10.5	14.2	11.2	7.7	7.2	8.5	5.6	9.9	13.6	12.6	21.6
XZ009	申扎县	2019-11-08 17:00:00	1.6	2.7	2	2.1	2.9	3.4	6.2	4.4	4.8	6.6	6.5	7	7.6	6.7	10.4	9.5	8.8	9.7	9.3	11.7	9.9	10.4	14.2	11.2	7.7	7.3	8.5	5.6	9.9	13.6	12.6	21.5
XZ009	申扎县	2019-11-08 18:00:00	1.5	2.7	2	2.1	2.9	3.4	6.2	4.5	4.8	6.6	6.5	7	7.6	6.7	10.4	9.5	8.8	9.7	9.3	11.7	9.9	10.4	14.2	11.2	7.7	7.2	8.5	5.6	9.9	13.6	12.6	21.6
XZ009	申扎县	2019-11-08 19:00:00	1.4	2.6	1.9	2.1	2.8	3.4	6.2	4.5	4.8	6.6	6.5	7	7.6	6.7	10.4	9.5	8.8	9.6	9.2	11.7	9.9	10.4	14.2	11.2	7.6	7.2	8.4	5.6	9.9	13.6	12.6	21.6
XZ009	申扎县	2019-11-08 20:00:00	1.3	2.5	1.9	2	2.8	3.4	6.2	4.5	4.8	6.7	6.5	7	7.6	6.7	10.4	9.5	8.8	9.6	9.2	11.7	9.9	10.4	14.2	11.2	7.6	7.2	8.4	5.6	9.9	13.6	12.6	21.5
XZ009	申扎县	2019-11-08 21:00:00	1.2	2.5	1.9	2	2.8	3.4	6.2	4.5	4.8	6.7	6.5	7	7.6	6.7	10.4	9.5	8.8	9.6	9.2	11.7	9.9	10.4	14.2	11.2	7.6	7.2	8.4	5.6	9.9	13.5	12.6	21.5
XZ009	申扎县	2019-11-08 23:00:00	1.1	2.4	1.8	1.9	2.8	3.3	6.2	4.5	4.8	6.6	6.5	7.1	7.6	6.7	10.4	9.4	8.8	9.6	9.2	11.7	9.9	10.4	14.1	11.1	7.6	7.2	8.4	5.6	9.9	13.5	12.6	21.5
XZ009	申扎县	2019-11-09 00:00:00	1	2.3	1.7	1.9	2.7	3.3	6.2	4.5	4.8	6.6	6.5	7.1	7.6	6.7	10.4	9.5	8.8	9.6	9.2	11.7	9.9	10.4	14.1	11.2	7.6	7.2	8.4	5.6	9.8	13.5	12.6	21.5
XZ009	申扎县	2019-11-09 01:00:00	0.9	2.3	1.7	1.8	2.7	3.3	6.2	4.5	4.8	6.6	6.5	7	7.6	6.7	10.4	9.5	8.8	9.6	9.2	11.7	9.9	10.4	14.1	11.2	7.6	7.1	8.4	5.5	9.8	13.5	12.6	21.5
XZ009	申扎县	2019-11-09 02:00:00	0.9	2.3	1.7	1.8	2.7	3.2	6.2	4.4	4.8	6.6	6.5	7	7.6	6.7	10.4	9.5	8.8	9.6	9.2	11.7	9.9	10.4	14.1	11.2	7.6	7.2	8.4	5.6	9.8	13.5	12.5	21.5
XZ009	申扎县	2019-11-09 03:00:00	0.9	2.3	1.7	1.7	2.7	3.2	6.2	4.4	4.7	6.6	6.5	7	7.6	6.7	10.3	9.5	8.8	9.6	9.2	11.7	9.9	10.4	14.1	11.2	7.6	7.2	8.3	5.5	9.9	13.5	12.5	21.5
XZ009	申扎县	2019-11-09 04:00:00	0.8	2.2	1.7	1.7	2.7	3.1	6.2	4.4	4.7	6.6	6.4	7	7.6	6.7	10.3	9.4	8.8	9.6	9.2	11.7	9.9	10.4	14.1	11.1	7.6	7.2	8.3	5.5	9.8	13.5	12.5	21.5
XZ009	申扎县	2019-11-09 05:00:00	0.6	2.2	1.6	1.7	2.6	3.1	6.2	4.3	4.7	6.5	6.4	7	7.6	6.7	10.3	9.4	8.8	9.6	9.2	11.7	9.9	10.4	14.1	11.2	7.5	7.2	8.4	5.5	9.8	13.5	12.5	21.5
XZ009	申扎县	2019-11-09 06:00:00	0.2	2	1.5	1.7	2.6	3.1	6.2	4.3	4.7	6.5	6.4	7	7.6	6.7	10.3	9.4	8.8	9.6	9.1	11.7	9.8	10.4	14.1	11.1	7.5	7.2	8.3	5.5	9.8	13.5	12.5	21.5
XZ009	申扎县	2019-11-09 07:00:00	0.1	1.9	1.4	1.6	2.6	3	6.2	4.3	4.7	6.5	6.4	7	7.6	6.7	10.3	9.4	8.8	9.5	9.2	11.6	9.9	10.4	14.1	11.1	7.5	7.2	8.3	5.5	9.8	13.5	12.5	21.5
XZ009	申扎县	2019-11-09 08:00:00	0	1.7	1.3	1.6	2.6	3	6.2	4.3	4.7	6.5	6.4	6.9	7.5	6.6	10.3	9.4	8.7	9.5	9.2	11.7	9.9	10.4	14.1	11.1	7.5	7.1	8.3	5.5	9.8	13.5	12.5	21.5
XZ009	申扎县	2019-11-09 09:00:00	0	1.4	1.2	1.6	2.6	3	6.2	4.3	4.7	6.5	6.4	6.9	7.5	6.6	10.3	9.4	8.7	9.5	9.2	11.7	9.9	10.4	14.1	11.1	7.5	7.1	8.3	5.5	9.8	13.5	12.5	21.5
XZ009	申扎县	2019-11-09 10:00:00	0	1.2	1.3	1.6	2.6	3	6.2	4.3	4.7	6.5	6.4	6.9	7.5	6.6	10.3	9.4	8.7	9.6	9.3	11.6	9.8	10.4	14.1	11.1	7.6	7.1	8.3	5.5	9.8	13.5	12.5	21.4
XZ009	申扎县	2019-11-09 11:00:00	0	1.4	1.3	1.6	2.6	3	6.2	4.3	4.7	6.5	6.4	6.9	7.5	6.6	10.3	9.4	8.7	9.6	9.2	11.7	9.8	10.4	14.1	11.1	7.5	7.1	8.3	5.5	9.8	13.5	12.5	21.4
XZ009	申扎县	2019-11-09 12:00:00	0.5	1.8	1.5	1.6	2.6	3	6.1	4.2	4.7	6.5	6.4	6.9	7.5	6.6	10.3	9.4	8.7	9.6	9.2	11.7	9.8	10.4	14.1	11.1	7.5	7.1	8.3	5.5	9.7	13.5	12.5	21.4
XZ009	申扎县	2019-11-09 13:00:00	1.2	2.2	1.8	1.7	2.7	3	6.1	4.2	4.6	6.5	6.4	6.9	7.5	6.6	10.3	9.4	8.7	9.6	9.2	11.6	9.8	10.4	14	11.1	7.5	7.1	8.3	5.5	9.8	13.5	12.5	21.4
XZ009	申扎县	2019-11-09 14:00:00	1.3	2.3	1.9	1.9	2.7	3.1	6.1	4.2	4.7	6.5	6.4	6.9	7.5	6.6	10.3	9.3	8.7	9.5	9.3	11.6	9.8	10.4	14.1	11.1	7.5	7.1	8.3	5.5	9.8	13.4	12.5	21.4
XZ009	申扎县	2019-11-09 15:00:00	1.4	2.4	1.9	2	2.8	3.2	6	4.3	4.7	6.5	6.4	6.9	7.5	6.6	10.3	9.4	8.7	9.5	9.2	11.6	9.8	10.4	14	11.1	7.5	7.1	8.3	5.5	9.8	13.4	12.5	21.4
XZ009	申扎县	2019-11-09 16:00:00	1.5	2.5	2	2.1	2.8	3.3	6.1	4.4	4.7	6.5	6.4	6.9	7.5	6.6	10.3	9.4	8.7	9.5	9.2	11.6	9.8	10.4	14	11.1	7.5	7.1	8.3	5.5	9.7	13.4	12.5	21.3
XZ009	申扎县	2019-11-09 17:00:00	1.5	2.5	2	2.1	2.8	3.4	6.1	4.5	4.8	6.6	6.4	6.9	7.5	6.6	10.3	9.4	8.7	9.5	9.2	11.6	9.8	10.4	14	11	7.5	7.1	8.3	5.4	9.8	13.4	12.4	21.4
XZ009	申扎县	2019-11-09 18:00:00	1.4	2.5	2	2.2	2.8	3.4	6.1	4.5	4.8	6.6	6.4	6.9	7.5	6.6	10.3	9.4	8.7	9.5	9.2	11.6	9.8	10.4	14	11.1	7.5	7.1	8.3	5.4	9.8	13.4	12.4	21.4
XZ009	申扎县	2019-11-09 19:00:00	1.3	2.4	1.9	2.1	2.8	3.4	6.1	4.5	4.8	6.6	6.4	7	7.5	6.6	10.3	9.3	8.7	9.5	9.1	11.6	9.8	10.3	14	11.1	7.5	7.1	8.3	5.4	9.7	13.4	12.5	21.4
XZ009	申扎县	2019-11-09 20:00:00	1.1	2.3	1.9	2.1	2.8	3.5	6.1	4.6	4.8	6.6	6.4	7	7.5	6.6	10.2	9.4	8.7	9.5	9.1	11.6	9.8	10.3	14	11.1	7.5	7.1	8.2	5.4	9.7	13.4	12.4	21.4
XZ009	申扎县	2019-11-09 21:00:00	1	2.2	1.8	2	2.8	3.4	6.1	4.5	4.8	6.6	6.4	6.9	7.5	6.6	10.2	9.3	8.7	9.5	9.1	11.6	9.8	10.3	14	11	7.4	7.1	8.2	5.4	9.7	13.4	12.4	21.3
XZ009	申扎县	2019-11-09 22:00:00	0.9	2.2	1.7	1.9	2.8	3.3	6.1	4.5	4.8	6.6	6.4	7	7.5	6.6	10.2	9.3	8.7	9.5	9.1	11.6	9.8	10.3	14	11.1	7.4	7.1	8.2	5.4	9.7	13.4	12.4	21.3
XZ009	申扎县	2019-11-09 23:00:00	0.8	2.1	1.7	1.9	2.7	3.3	6.1	4.5	4.8	6.5	6.4	7	7.5	6.6	10.2	9.3	8.7	9.5	9.1	11.6	9.8	10.3	14	11	7.4	7.1	8.2	5.4	9.7	13.4	12.4	21.3
XZ009	申扎县	2019-11-10 00:00:00	0.7	2.1	1.7	1.8	2.7	3.2	6.1	4.4	4.7	6.6	6.4	6.9	7.5	6.6	10.2	9.3	8.7	9.5	9.1	11.6	9.8	10.3	13.9	11	7.4	7	8.2	5.4	9.7	13.4	12.4	21.3
XZ009	申扎县	2019-11-10 01:00:00	0.5	2	1.6	1.8	2.7	3.2	6.1	4.4	4.7	6.5	6.4	6.9	7.5	6.6	10.2	9.3	8.7	9.5	9.1	11.6	9.8	10.3	13.9	11	7.4	7	8.2	5.4	9.7	13.4	12.4	21.3
XZ009	申扎县	2019-11-10 02:00:00	0.1	1.9	1.4	1.7	2.6	3.1	6.1	4.4	4.7	6.5	6.4	6.9	7.5	6.6	10.2	9.3	8.7	9.5	9.1	11.6	9.8	10.3	13.9	11	7.4	7	8.2	5.4	9.7	13.4	12.4	21.3
XZ009	申扎县	2019-11-10 03:00:00	0	1.7	1.3	1.7	2.6	3.1	6.1	4.3	4.7	6.5	6.3	6.9	7.5	6.6	10.2	9.3	8.7	9.4	9.1	11.6	9.7	10.3	13.9	11	7.4	7	8.2	5.4	9.7	13.4	12.4	21.3
XZ009	申扎县	2019-11-10 04:00:00	0	1.4	1.2	1.6	2.6	3.1	6.1	4.3	4.7	6.5	6.3	6.9	7.5	6.6	10.2	9.3	8.7	9.4	9.1	11.6	9.7	10.3	14	11	7.4	7	8.2	5.4	9.7	13.3	12.4	21.3
XZ009	申扎县	2019-11-10 05:00:00	0	0.9	1.2	1.6	2.5	3	6.2	4.3	4.7	6.5	6.3	6.9	7.4	6.6	10.2	9.3	8.6	9.4	9.1	11.6	9.7	10.3	13.9	11	7.4	7	8.2	5.4	9.7	13.4	12.4	21.3
XZ009	申扎县	2019-11-10 06:00:00	0	0.5	1.2	1.6	2.5	3	6.2	4.2	4.7	6.4	6.3	6.9	7.4	6.6	10.2	9.3	8.6	9.4	9	11.6	9.7	10.3	13.9	11	7.4	7	8.2	5.4	9.7	13.4	12.4	21.3
XZ009	申扎县	2019-11-10 07:00:00	0	0.4	1.1	1.6	2.5	3	6.2	4.3	4.7	6.4	6.3	6.9	7.4	6.6	10.1	9.2	8.6	9.4	9	11.6	9.7	10.3	13.9	11	7.4	7	8.1	5.4	9.7	13.4	12.3	21.3
XZ009	申扎县	2019-11-10 08:00:00	0	0.3	0.8	1.6	2.4	3	6.2	4.2	4.7	6.4	6.3	6.8	7.4	6.6	10.1	9.2	8.6	9.4	9	11.6	9.7	10.3	13.9	11	7.3	7	8.1	5.4	9.7	13.4	12.4	21.3
XZ009	申扎县	2019-11-10 09:00:00	0	0.2	0.5	1.5	2.4	2.9	6.3	4.2	4.7	6.4	6.2	6.8	7.4	6.6	10.1	9.2	8.6	9.4	9	11.5	9.7	10.3	13.9	11	7.4	7	8.1	5.4	9.7	13.4	12.3	21.3
XZ009	申扎县	2019-11-10 10:00:00	0	0.3	0.4	1.4	2.4	2.9	6.3	4.2	4.7	6.4	6.3	6.8	7.4	6.5	10.1	9.2	8.6	9.4	9.1	11.5	9.7	10.2	13.9	11	7.4	7	8.1	5.4	9.7	13.3	12.3	21.3
XZ009	申扎县	2019-11-10 11:00:00	0	0.4	0.4	1.3	2.4	2.9	6.3	4.2	4.6	6.4	6.2	6.8	7.4	6.5	10.1	9.2	8.6	9.4	9.1	11.5	9.6	10.3	13.9	11	7.4	7	8.1	5.4	9.7	13.4	12.3	21.3
XZ009	申扎县	2019-11-10 12:00:00	0	0.6	0.5	1.3	2.4	2.9	6.2	4.2	4.6	6.4	6.2	6.8	7.4	6.5	10.1	9.2	8.6	9.4	9.1	11.6	9.7	10.3	13.9	11	7.4	7	8.1	5.3	9.7	13.4	12.3	21.2
XZ009	申扎县	2019-11-10 13:00:00	1	1.2	0.8	1.4	2.5	2.9	6.1	4.1	4.6	6.4	6.2	6.8	7.4	6.5	10.1	9.2	8.6	9.4	9.1	11.6	9.7	10.3	13.9	11	7.4	7	8.1	5.4	9.6	13.4	12.3	21.3
XZ009	申扎县	2019-11-10 14:00:00	1.1	2.3	1.5	1.5	2.6	2.9	6	4.1	4.6	6.3	6.2	6.8	7.4	6.5	10.1	9.2	8.6	9.4	9.1	11.5	9.7	10.3	13.9	11	7.4	6.9	8.1	5.3	9.7	13.3	12.3	21.3
XZ009	申扎县	2019-11-10 15:00:00	1.2	2.4	1.8	1.7	2.6	2.9	5.9	4.1	4.6	6.4	6.2	6.8	7.4	6.5	10.1	9.2	8.6	9.4	9.1	11.5	9.7	10.3	13.8	10.9	7.4	7	8.1	5.3	9.6	13.3	12.3	21.2
XZ009	申扎县	2019-11-10 16:00:00	1.3	2.4	1.9	1.8	2.7	3	5.9	4.2	4.6	6.4	6.2	6.8	7.4	6.5	10.1	9.2	8.6	9.4	9.1	11.5	9.7	10.2	13.9	10.9	7.4	6.9	8.1	5.3	9.6	13.3	12.3	21.2
XZ009	申扎县	2019-11-10 17:00:00	1.3	2.5	1.9	1.9	2.7	3.2	5.9	4.3	4.6	6.4	6.2	6.8	7.4	6.5	10.1	9.2	8.6	9.4	9.1	11.5	9.6	10.2	13.8	10.9	7.4	7	8.1	5.3	9.6	13.3	12.3	21.2
XZ009	申扎县	2019-11-10 18:00:00	1.3	2.5	1.9	2	2.7	3.2	5.9	4.3	4.6	6.4	6.3	6.8	7.4	6.5	10.1	9.2	8.6	9.4	9.1	11.5	9.7	10.2	13.8	10.9	7.3	6.9	8.1	5.3	9.6	13.3	12.3	21.2
XZ009	申扎县	2019-11-10 19:00:00	1.2	2.4	1.9	2	2.7	3.3	5.9	4.4	4.6	6.4	6.3	6.8	7.4	6.5	10.1	9.2	8.6	9.4	9	11.5	9.7	10.2	13.8	10.9	7.3	6.9	8.1	5.3	9.6	13.3	12.3	21.2
XZ009	申扎县	2019-11-10 20:00:00	1	2.3	1.8	2	2.7	3.2	6	4.3	4.7	6.4	6.3	6.8	7.4	6.5	10.1	9.2	8.6	9.3	9	11.4	9.6	10.2	13.8	10.9	7.3	6.9	8.1	5.3	9.6	13.3	12.3	21.2
XZ009	申扎县	2019-11-10 21:00:00	0.9	2.3	1.7	1.9	2.7	3.2	6	4.4	4.7	6.4	6.3	6.8	7.4	6.5	10.1	9.2	8.5	9.3	9	11.4	9.7	10.2	13.8	10.9	7.3	6.9	8.1	5.4	9.6	13.3	12.3	21.2
XZ009	申扎县	2019-11-10 22:00:00	0.8	2.2	1.7	1.8	2.7	3.2	6	4.4	4.6	6.4	6.3	6.8	7.4	6.5	10.1	9.2	8.5	9.3	9	11.4	9.6	10.2	13.8	10.9	7.3	6.9	8.1	5.3	9.6	13.3	12.3	21.2
XZ009	申扎县	2019-11-10 23:00:00	0.7	2.1	1.6	1.8	2.6	3.1	6	4.3	4.6	6.4	6.3	6.8	7.3	6.5	10	9.2	8.5	9.3	9	11.4	9.6	10.2	13.7	10.9	7.3	6.9	8	5.3	9.6	13.3	12.2	21.2
XZ009	申扎县	2019-11-11 00:00:00	0.5	2.1	1.6	1.7	2.6	3.1	6	4.3	4.6	6.4	6.3	6.8	7.3	6.5	10	9.2	8.5	9.3	8.9	11.4	9.6	10.2	13.7	10.9	7.3	6.9	8	5.3	9.6	13.3	12.3	21.2
XZ009	申扎县	2019-11-11 01:00:00	0.2	1.9	1.4	1.7	2.6	3	6	4.3	4.6	6.4	6.2	6.8	7.3	6.5	10	9.1	8.5	9.3	9	11.4	9.6	10.2	13.7	10.9	7.3	6.9	8	5.3	9.6	13.3	12.2	21.2
XZ009	申扎县	2019-11-11 02:00:00	0	1.7	1.3	1.6	2.5	3	6	4.3	4.6	6.4	6.2	6.8	7.3	6.5	10	9.1	8.5	9.3	8.9	11.4	9.6	10.2	13.7	10.9	7.2	6.9	8	5.3	9.6	13.3	12.2	21.2
XZ009	申扎县	2019-11-11 03:00:00	0	1.4	1.2	1.6	2.5	3	6	4.2	4.6	6.4	6.2	6.8	7.3	6.5	10	9.1	8.5	9.3	8.9	11.4	9.6	10.2	13.7	10.9	7.3	6.9	8	5.3	9.6	13.3	12.2	21.2
XZ009	申扎县	2019-11-11 04:00:00	0	0.9	1.2	1.5	2.5	2.9	6	4.2	4.6	6.3	6.2	6.8	7.3	6.5	10	9.1	8.5	9.3	8.9	11.4	9.6	10.2	13.7	10.9	7.2	6.9	8	5.3	9.6	13.2	12.2	21.2
XZ009	申扎县	2019-11-11 05:00:00	0	0.5	1.2	1.6	2.4	2.9	6	4.2	4.6	6.4	6.2	6.7	7.3	6.5	10	9.1	8.5	9.3	8.9	11.4	9.6	10.1	13.7	10.9	7.2	6.9	8	5.3	9.6	13.2	12.2	21.1
XZ009	申扎县	2019-11-11 06:00:00	0	0.4	1.1	1.6	2.4	2.9	6.1	4.2	4.6	6.3	6.2	6.7	7.3	6.4	10	9.1	8.5	9.3	8.9	11.4	9.6	10.2	13.7	10.8	7.2	6.8	8	5.3	9.6	13.2	12.2	21.1
XZ009	申扎县	2019-11-11 07:00:00	0	0.4	0.8	1.5	2.4	2.9	6.1	4.1	4.6	6.3	6.2	6.7	7.3	6.4	10	9	8.5	9.3	8.9	11.4	9.6	10.1	13.7	10.8	7.2	6.8	8	5.3	9.6	13.3	12.2	21.2
XZ009	申扎县	2019-11-11 08:00:00	0	0.3	0.6	1.5	2.4	2.9	6.1	4.1	4.6	6.3	6.1	6.7	7.3	6.4	10	9.1	8.5	9.2	8.9	11.4	9.6	10.1	13.7	10.8	7.2	6.8	7.9	5.3	9.6	13.3	12.2	21.1
XZ009	申扎县	2019-11-11 09:00:00	0	0.3	0.4	1.4	2.3	2.9	6.1	4.1	4.6	6.3	6.1	6.7	7.3	6.4	10	9.1	8.5	9.2	8.9	11.4	9.6	10.1	13.7	10.8	7.2	6.8	8	5.2	9.5	13.2	12.2	21.1
XZ009	申扎县	2019-11-11 10:00:00	0	0.3	0.3	1.3	2.3	2.8	6.2	4.1	4.6	6.3	6.1	6.7	7.2	6.4	10	9	8.4	9.3	9	11.3	9.6	10.1	13.7	10.8	7.2	6.8	7.9	5.2	9.6	13.2	12.2	21.1
XZ009	申扎县	2019-11-11 11:00:00	0	0.4	0.3	1.2	2.3	2.8	6.1	4.1	4.6	6.3	6.1	6.7	7.2	6.4	10	9	8.4	9.3	8.9	11.4	9.6	10.1	13.7	10.8	7.2	6.8	8	5.2	9.5	13.2	12.2	21.1
XZ009	申扎县	2019-11-11 12:00:00	0.1	0.6	0.4	1.2	2.3	2.8	6.1	4.1	4.5	6.3	6.1	6.7	7.2	6.4	10	9	8.4	9.2	9	11.4	9.6	10.1	13.7	10.8	7.2	6.8	8	5.2	9.5	13.2	12.2	21.1
XZ009	申扎县	2019-11-11 13:00:00	0.9	1.2	0.7	1.3	2.4	2.8	6	4.1	4.5	6.3	6.1	6.7	7.2	6.4	10	9.1	8.5	9.3	8.9	11.4	9.6	10.1	13.7	10.8	7.2	6.8	7.9	5.2	9.5	13.2	12.2	21.1
XZ009	申扎县	2019-11-11 14:00:00	1	2.4	1.3	1.4	2.5	2.8	5.8	4	4.5	6.2	6.1	6.7	7.2	6.4	10	9	8.4	9.3	8.9	11.3	9.6	10.1	13.6	10.8	7.2	6.8	8	5.2	9.5	13.2	12.2	21.1
XZ009	申扎县	2019-11-11 15:00:00	1.1	2.4	1.8	1.6	2.6	2.8	5.8	4	4.5	6.2	6.1	6.6	7.2	6.4	10	9	8.4	9.3	8.9	11.3	9.5	10.1	13.6	10.8	7.2	6.8	7.9	5.2	9.5	13.2	12.2	21.1
XZ009	申扎县	2019-11-11 16:00:00	1.2	2.5	1.8	1.8	2.6	3	5.8	4.1	4.5	6.2	6.1	6.7	7.2	6.4	10	9	8.4	9.3	8.9	11.3	9.6	10.1	13.6	10.8	7.2	6.8	7.9	5.2	9.5	13.2	12.2	21.1
XZ009	申扎县	2019-11-11 17:00:00	1.2	2.5	1.9	1.9	2.7	3.1	5.8	4.2	4.5	6.3	6.1	6.7	7.2	6.4	9.9	9	8.4	9.3	8.9	11.3	9.6	10.1	13.6	10.8	7.2	6.8	7.9	5.2	9.5	13.2	12.2	21.1
XZ009	申扎县	2019-11-11 18:00:00	1.2	2.5	1.9	1.9	2.7	3.1	5.8	4.2	4.6	6.3	6.1	6.6	7.2	6.4	9.9	9	8.4	9.2	8.9	11.3	9.5	10.1	13.6	10.8	7.2	6.8	7.9	5.2	9.5	13.2	12.1	21.1
XZ009	申扎县	2019-11-11 19:00:00	1.1	2.4	1.8	1.9	2.7	3.2	5.8	4.2	4.6	6.3	6.1	6.6	7.2	6.4	9.9	9	8.4	9.2	8.9	11.3	9.5	10.1	13.6	10.7	7.2	6.8	7.9	5.2	9.5	13.2	12.1	21.1
XZ009	申扎县	2019-11-11 20:00:00	1	2.3	1.7	1.9	2.7	3.1	5.8	4.3	4.6	6.3	6.2	6.7	7.2	6.4	9.9	9	8.4	9.2	8.9	11.3	9.5	10	13.6	10.7	7.1	6.8	7.9	5.2	9.5	13.2	12.1	21.1
XZ009	申扎县	2019-11-11 21:00:00	0.8	2.2	1.7	1.8	2.6	3.1	5.9	4.3	4.6	6.3	6.2	6.7	7.2	6.4	9.9	9	8.4	9.2	8.8	11.3	9.5	10	13.6	10.7	7.2	6.8	7.9	5.2	9.5	13.2	12.1	21
XZ009	申扎县	2019-11-11 22:00:00	0.7	2.2	1.6	1.8	2.6	3.1	5.8	4.3	4.6	6.3	6.2	6.7	7.2	6.4	9.9	9	8.4	9.2	8.8	11.3	9.5	10	13.6	10.7	7.1	6.8	7.9	5.2	9.5	13.2	12.1	21
XZ009	申扎县	2019-11-11 23:00:00	0.6	2.1	1.6	1.7	2.6	3	5.8	4.3	4.6	6.3	6.2	6.7	7.2	6.4	9.9	9	8.4	9.2	8.8	11.3	9.5	10.1	13.6	10.7	7.1	6.8	7.9	5.2	9.5	13.2	12.1	21
XZ009	申扎县	2019-11-12 00:00:00	0.6	2.1	1.6	1.6	2.6	3	5.8	4.2	4.5	6.3	6.2	6.7	7.2	6.4	9.9	9	8.4	9.2	8.8	11.3	9.5	10	13.6	10.7	7.1	6.8	7.9	5.2	9.5	13.2	12.1	21
XZ009	申扎县	2019-11-12 01:00:00	0.3	2	1.5	1.6	2.6	2.9	5.8	4.2	4.5	6.3	6.1	6.7	7.2	6.4	9.9	9	8.4	9.2	8.8	11.3	9.5	10	13.6	10.7	7.1	6.8	7.9	5.2	9.5	13.2	12.1	21
XZ009	申扎县	2019-11-12 02:00:00	0.1	1.8	1.3	1.6	2.5	2.9	5.8	4.2	4.5	6.3	6.1	6.7	7.2	6.4	9.9	9	8.4	9.2	8.8	11.3	9.5	10	13.5	10.7	7.1	6.8	7.9	5.2	9.5	13.1	12.1	21
XZ009	申扎县	2019-11-12 03:00:00	0	1.7	1.2	1.5	2.5	2.9	5.9	4.1	4.5	6.2	6.1	6.7	7.2	6.4	9.9	9	8.4	9.2	8.8	11.3	9.5	10	13.5	10.7	7.1	6.7	7.9	5.2	9.5	13.1	12.1	21
XZ009	申扎县	2019-11-12 04:00:00	0	1.5	1.2	1.5	2.5	2.9	5.8	4.1	4.5	6.2	6.1	6.6	7.2	6.4	9.9	9	8.4	9.2	8.8	11.3	9.5	10	13.5	10.7	7.1	6.7	7.8	5.2	9.5	13.1	12.1	21
XZ009	申扎县	2019-11-12 05:00:00	0	1.2	1.1	1.5	2.4	2.8	5.9	4.1	4.5	6.2	6.1	6.6	7.2	6.4	9.9	9	8.4	9.2	8.8	11.3	9.5	10	13.5	10.7	7.1	6.7	7.9	5.2	9.4	13.1	12.1	21
XZ009	申扎县	2019-11-12 06:00:00	0	0.8	1.2	1.5	2.4	2.8	5.9	4.1	4.5	6.2	6.1	6.6	7.2	6.3	9.9	9	8.4	9.1	8.8	11.2	9.5	10	13.5	10.7	7.1	6.7	7.9	5.2	9.4	13.1	12.1	21
XZ009	申扎县	2019-11-12 07:00:00	0	0.6	1.2	1.5	2.4	2.8	5.9	4.1	4.5	6.2	6.1	6.6	7.2	6.3	9.9	8.9	8.4	9.1	8.8	11.2	9.5	10	13.5	10.7	7.1	6.7	7.9	5.2	9.4	13.1	12.1	21
XZ009	申扎县	2019-11-12 08:00:00	0	0.5	1.1	1.5	2.4	2.8	5.9	4.1	4.5	6.2	6	6.6	7.2	6.3	9.9	8.9	8.3	9.1	8.8	11.2	9.5	10	13.5	10.7	7.1	6.7	7.8	5.2	9.4	13.1	12.1	21
XZ009	申扎县	2019-11-12 09:00:00	0	0.4	0.9	1.5	2.4	2.8	5.9	4.1	4.5	6.2	6	6.6	7.2	6.3	9.9	8.9	8.4	9.1	8.8	11.2	9.5	10	13.5	10.7	7.1	6.7	7.8	5.2	9.4	13.1	12	21
XZ009	申扎县	2019-11-12 10:00:00	0	0.5	0.7	1.5	2.4	2.8	6	4	4.5	6.2	6.1	6.6	7.1	6.3	9.8	8.9	8.3	9.2	8.9	11.2	9.4	10	13.5	10.7	7.1	6.7	7.8	5.1	9.4	13.1	12	21
XZ009	申扎县	2019-11-12 11:00:00	0	0.6	0.7	1.4	2.3	2.8	6	4	4.5	6.2	6	6.6	7.1	6.3	9.8	8.9	8.3	9.2	8.8	11.2	9.5	10	13.5	10.7	7.1	6.7	7.8	5.1	9.4	13.1	12	21
XZ009	申扎县	2019-11-12 12:00:00	0.1	0.7	0.8	1.4	2.4	2.7	5.9	4	4.5	6.2	6	6.6	7.1	6.3	9.8	8.9	8.3	9.2	8.8	11.2	9.5	10	13.5	10.7	7.1	6.7	7.8	5.1	9.4	13.1	12	21
XZ009	申扎县	2019-11-12 13:00:00	0.9	1.3	1.2	1.5	2.4	2.7	5.8	4	4.4	6.2	6	6.6	7.1	6.3	9.8	8.9	8.3	9.2	8.8	11.2	9.4	10	13.4	10.6	7.1	6.7	7.8	5.1	9.4	13	12	21
XZ009	申扎县	2019-11-12 15:00:00	1	2.3	1.6	1.7	2.5	2.8	5.6	4	4.4	6.2	6	6.5	7.1	6.3	9.8	8.9	8.3	9.1	8.8	11.2	9.4	10	13.5	10.6	7.1	6.7	7.8	5.1	9.4	13.1	12	21
XZ009	申扎县	2019-11-12 16:00:00	1.1	2.4	1.6	1.8	2.6	2.9	5.7	4	4.4	6.2	6	6.5	7.1	6.3	9.8	8.9	8.3	9.1	8.8	11.1	9.4	10	13.5	10.6	7.1	6.7	7.8	5.1	9.4	13.1	12	21
XZ009	申扎县	2019-11-12 17:00:00	1.1	2.4	1.7	1.9	2.6	3	5.7	4.1	4.5	6.2	6	6.6	7.1	6.3	9.8	8.9	8.3	9.2	8.8	11.2	9.4	10	13.5	10.6	7.1	6.7	7.8	5.1	9.4	13.1	12	21
XZ009	申扎县	2019-11-12 18:00:00	1	2.4	1.7	1.9	2.6	3	5.7	4.2	4.5	6.2	6	6.6	7.1	6.3	9.8	8.9	8.3	9.1	8.8	11.2	9.4	9.9	13.4	10.6	7.1	6.7	7.8	5.1	9.4	13.1	12	20.9
XZ009	申扎县	2019-11-12 19:00:00	1	2.3	1.7	1.9	2.6	3	5.7	4.2	4.5	6.2	6.1	6.6	7.1	6.3	9.8	8.9	8.3	9.1	8.7	11.2	9.4	9.9	13.4	10.6	7	6.7	7.8	5.1	9.4	13.1	12	20.9
XZ009	申扎县	2019-11-12 20:00:00	0.8	2.2	1.6	1.9	2.6	3.1	5.7	4.2	4.5	6.2	6.1	6.6	7.1	6.3	9.8	8.9	8.3	9.1	8.7	11.2	9.4	9.9	13.4	10.6	7.1	6.7	7.8	5.1	9.4	13.1	12	20.9
XZ009	申扎县	2019-11-12 21:00:00	0.7	2.1	1.5	1.8	2.6	3	5.7	4.2	4.5	6.2	6.1	6.6	7.1	6.3	9.8	8.9	8.3	9.1	8.7	11.1	9.5	9.9	13.4	10.6	7	6.7	7.7	5.1	9.4	13.1	12	20.9
XZ009	申扎县	2019-11-12 22:00:00	0.6	2	1.5	1.7	2.5	3	5.7	4.2	4.5	6.2	6.1	6.6	7.1	6.3	9.8	8.9	8.3	9.1	8.7	11.1	9.4	9.9	13.4	10.6	7	6.6	7.8	5.1	9.4	13	12	20.9
XZ009	申扎县	2019-11-12 23:00:00	0.5	2	1.5	1.7	2.5	2.9	5.7	4.2	4.5	6.2	6.1	6.6	7.1	6.3	9.8	8.9	8.3	9.1	8.7	11.1	9.4	9.9	13.4	10.6	7	6.7	7.7	5.1	9.4	13	12	20.9
XZ009	申扎县	2019-11-13 00:00:00	0.2	1.8	1.3	1.6	2.5	2.9	5.7	4.1	4.5	6.2	6.1	6.6	7.1	6.3	9.8	8.9	8.3	9.1	8.7	11.2	9.4	9.9	13.4	10.6	7	6.6	7.7	5.1	9.4	13	12	20.9
XZ009	申扎县	2019-11-13 01:00:00	0	1.7	1.2	1.5	2.4	2.9	5.7	4.1	4.5	6.2	6	6.6	7.1	6.3	9.8	8.9	8.3	9.1	8.7	11.1	9.4	9.8	13.4	10.6	7	6.6	7.7	5.1	9.4	13	12	20.9
XZ009	申扎县	2019-11-13 02:00:00	0	1.4	1.1	1.5	2.4	2.8	5.8	4.1	4.4	6.2	6	6.6	7.1	6.3	9.8	8.8	8.3	9.1	8.7	11.1	9.4	10	13.4	10.6	7	6.6	7.7	5.1	9.4	13.1	12	20.9
XZ009	申扎县	2019-11-13 03:00:00	0	0.9	1.1	1.5	2.4	2.8	5.8	4.1	4.5	6.2	6	6.6	7.1	6.3	9.8	8.8	8.3	9.1	8.7	11.1	9.4	9.8	13.4	10.5	7	6.6	7.7	5.1	9.4	13	12	20.9
XZ009	申扎县	2019-11-13 04:00:00	0	0.5	1.1	1.5	2.3	2.8	5.8	4	4.4	6.2	6	6.5	7.1	6.3	9.8	8.8	8.3	9	8.7	11.1	9.4	9.9	13.3	10.6	7	6.6	7.7	5.1	9.4	13	12	20.9
XZ009	申扎县	2019-11-13 05:00:00	0	0.3	1	1.5	2.3	2.8	5.8	4	4.4	6.1	6	6.5	7.1	6.3	9.8	8.8	8.3	9	8.6	11.1	9.4	9.9	13.3	10.6	7	6.6	7.7	5.1	9.3	13	11.9	20.9
XZ009	申扎县	2019-11-13 06:00:00	0	0.3	0.6	1.5	2.3	2.7	5.9	4	4.5	6.2	6	6.5	7.1	6.3	9.7	8.9	8.3	9	8.6	11.1	9.4	9.8	13.3	10.6	7	6.6	7.7	5.1	9.4	13	12	20.9
XZ009	申扎县	2019-11-13 07:00:00	0	0.2	0.4	1.3	2.3	2.7	5.9	4	4.4	6.1	6	6.5	7.1	6.3	9.7	8.8	8.3	9	8.7	11.1	9.4	9.9	13.3	10.6	7	6.6	7.7	5.1	9.3	13	11.9	20.9
XZ009	申扎县	2019-11-13 08:00:00	0	0.2	0.3	1.2	2.2	2.7	5.9	4	4.5	6.1	6	6.5	7.1	6.3	9.7	8.8	8.2	9	8.7	11.1	9.3	9.9	13.3	10.5	6.9	6.6	7.7	5.1	9.3	13	11.9	20.9
XZ009	申扎县	2019-11-13 09:00:00	0	0.2	0.2	1	2.2	2.7	6	4	4.4	6.1	6	6.5	7	6.3	9.7	8.8	8.3	9	8.6	11.1	9.3	9.8	13.3	10.5	6.9	6.6	7.7	5	9.3	13	11.9	20.9
XZ009	申扎县	2019-11-13 10:00:00	0	0.2	0.1	0.7	2.1	2.7	6	4	4.4	6.1	6	6.5	7	6.2	9.7	8.7	8.2	9	8.8	11.1	9.3	9.8	13.3	10.5	7	6.6	7.7	5	9.3	13	11.9	20.9
XZ009	申扎县	2019-11-13 11:00:00	0	0.2	0.2	0.5	2.1	2.7	6	3.9	4.4	6.1	5.9	6.5	7	6.2	9.7	8.7	8.2	9	8.7	11.1	9.3	9.8	13.3	10.5	7	6.6	7.7	5	9.3	13	11.9	20.8
XZ009	申扎县	2019-11-13 13:00:00	0.8	0.9	0.4	0.6	2.2	2.6	5.9	3.9	4.4	6.1	5.9	6.5	7	6.2	9.7	8.7	8.2	9	8.7	11.1	9.3	9.8	13.3	10.5	7	6.6	7.7	5	9.3	13	11.9	20.9
XZ009	申扎县	2019-11-13 14:00:00	0.9	2.4	0.7	0.9	2.3	2.6	5.7	3.9	4.4	6.1	5.9	6.5	7	6.2	9.7	8.8	8.2	9	8.7	11.1	9.3	9.8	13.3	10.5	7	6.6	7.7	5	9.3	13	11.9	20.9
XZ009	申扎县	2019-11-13 15:00:00	1	2.3	1.6	1.4	2.4	2.6	5.6	3.9	4.3	6.1	5.9	6.5	7	6.2	9.7	8.8	8.2	9	8.7	11.1	9.3	9.8	13.3	10.5	7	6.6	7.7	5	9.3	13	11.9	20.8
XZ009	申扎县	2019-11-13 16:00:00	1.1	2.3	1.7	1.7	2.5	2.7	5.5	3.9	4.4	6.1	5.9	6.4	7	6.2	9.7	8.8	8.2	9	8.7	11.1	9.3	9.8	13.3	10.5	7	6.6	7.7	5	9.3	13	11.9	20.8
XZ009	申扎县	2019-11-13 17:00:00	1.1	2.4	1.8	1.8	2.5	2.9	5.5	4	4.4	6.1	5.9	6.4	7	6.2	9.7	8.8	8.1	9.1	8.7	11.1	9.3	9.8	13.3	10.5	6.9	6.6	7.6	5	9.3	13	11.9	20.8
XZ009	申扎县	2019-11-13 18:00:00	1	2.4	1.7	1.8	2.5	2.9	5.6	4	4.4	6.1	6	6.4	7	6.2	9.7	8.8	8.2	9	8.7	11.1	9.3	9.8	13.3	10.5	6.9	6.6	7.6	5	9.3	13	11.9	20.8
XZ009	申扎县	2019-11-13 19:00:00	0.9	2.3	1.7	1.8	2.5	3	5.6	4.1	4.4	6.1	6	6.5	7	6.2	9.7	8.8	8.2	9.1	8.7	11	9.3	9.8	13.3	10.5	6.9	6.6	7.6	5	9.3	12.9	11.9	20.8
XZ009	申扎县	2019-11-13 20:00:00	0.8	2.2	1.7	1.8	2.5	3	5.6	4.1	4.4	6.1	6	6.5	7	6.2	9.7	8.8	8.2	9	8.6	11	9.3	9.8	13.2	10.5	6.9	6.6	7.6	5	9.3	13	11.9	20.8
XZ009	申扎县	2019-11-13 21:00:00	0.7	2.1	1.6	1.7	2.5	2.9	5.6	4.1	4.4	6.2	6	6.5	7	6.2	9.7	8.8	8.2	9	8.6	11	9.3	9.8	13.2	10.5	6.9	6.5	7.6	5	9.3	13	11.9	20.8
XZ009	申扎县	2019-11-13 22:00:00	0.6	2	1.6	1.7	2.5	2.9	5.6	4.1	4.4	6.2	6	6.5	7	6.2	9.7	8.8	8.2	9	8.6	11	9.3	9.8	13.2	10.5	6.9	6.5	7.6	5	9.3	13	11.9	20.8
XZ009	申扎县	2019-11-13 23:00:00	0.6	2	1.5	1.6	2.5	2.9	5.6	4.1	4.4	6.1	6	6.5	7	6.2	9.7	8.7	8.2	9	8.6	11	9.3	9.8	13.2	10.5	6.9	6.5	7.6	5	9.3	13	11.9	20.8
XZ009	申扎县	2019-11-14 00:00:00	0.4	1.9	1.5	1.6	2.4	2.8	5.6	4.1	4.4	6.1	6	6.5	7	6.2	9.7	8.7	8.2	8.9	8.6	11	9.3	9.8	13.2	10.4	6.9	6.5	7.6	5	9.3	12.9	11.9	20.8
XZ009	申扎县	2019-11-14 01:00:00	0.1	1.8	1.3	1.5	2.4	2.8	5.6	4	4.4	6.1	6	6.5	7	6.2	9.7	8.7	8.2	9	8.6	11	9.3	9.8	13.2	10.4	6.9	6.5	7.6	5	9.3	13	11.8	20.8
XZ009	申扎县	2019-11-14 02:00:00	0	1.6	1.2	1.5	2.4	2.8	5.6	4	4.4	6.1	5.9	6.5	7	6.2	9.7	8.7	8.2	9	8.6	11	9.3	9.8	13.2	10.4	6.9	6.5	7.6	5	9.2	12.9	11.8	20.8
XZ009	申扎县	2019-11-14 03:00:00	0	1.2	1.1	1.5	2.3	2.7	5.7	4	4.4	6.1	5.9	6.5	7	6.2	9.7	8.7	8.2	8.9	8.6	11	9.3	9.8	13.2	10.4	6.8	6.5	7.6	5	9.3	12.9	11.8	20.8
XZ009	申扎县	2019-11-14 04:00:00	0	0.7	1.1	1.4	2.3	2.7	5.6	4	4.4	6.1	5.9	6.5	7	6.2	9.6	8.7	8.2	8.9	8.6	11	9.3	9.8	13.2	10.4	6.9	6.5	7.6	5	9.3	12.9	11.8	20.8
XZ009	申扎县	2019-11-14 05:00:00	0	0.4	1.1	1.4	2.3	2.7	5.7	4	4.4	6.1	5.9	6.5	7	6.2	9.6	8.7	8.2	8.9	8.6	11	9.3	9.8	13.2	10.4	6.9	6.5	7.6	5	9.3	12.9	11.8	20.8
XZ009	申扎县	2019-11-14 06:00:00	0	0.3	0.8	1.4	2.2	2.7	5.7	4	4.4	6.1	5.9	6.4	7	6.2	9.6	8.7	8.1	8.9	8.6	11	9.3	9.8	13.2	10.4	6.9	6.5	7.6	5	9.2	12.9	11.8	20.8
XZ009	申扎县	2019-11-14 07:00:00	0	0.3	0.5	1.4	2.2	2.7	5.8	3.9	4.4	6.1	5.9	6.4	7	6.2	9.6	8.7	8.2	8.9	8.5	11	9.2	9.8	13.2	10.4	6.8	6.5	7.6	5	9.2	12.9	11.8	20.8
XZ009	申扎县	2019-11-14 08:00:00	0	0.2	0.3	1.2	2.2	2.6	5.8	3.9	4.4	6	5.9	6.4	7	6.2	9.6	8.7	8.1	8.9	8.5	11	9.2	9.7	13.2	10.4	6.8	6.5	7.5	5	9.2	12.9	11.8	20.8
XZ009	申扎县	2019-11-14 09:00:00	0	0.2	0.2	1.1	2.1	2.6	5.9	3.9	4.4	6	5.9	6.4	6.9	6.2	9.6	8.6	8.1	8.9	8.6	11	9.2	9.7	13.2	10.4	6.8	6.5	7.6	5	9.2	12.9	11.8	20.7
XZ009	申扎县	2019-11-14 10:00:00	0	0.2	0.2	0.9	2.1	2.6	5.9	3.9	4.4	6	5.9	6.4	6.9	6.2	9.6	8.7	8.1	8.9	8.7	11	9.2	9.7	13.1	10.4	6.8	6.5	7.5	4.9	9.2	12.9	11.8	20.8
XZ009	申扎县	2019-11-14 11:00:00	0	0.3	0.2	0.7	2.1	2.6	5.9	3.9	4.4	6	5.9	6.4	6.9	6.2	9.6	8.6	8.1	8.9	8.6	11	9.2	9.7	13.1	10.4	6.8	6.5	7.6	5	9.2	12.9	11.8	20.8
XZ009	申扎县	2019-11-14 12:00:00	0	0.5	0.3	0.7	2.1	2.6	5.8	3.9	4.4	6	5.9	6.4	6.9	6.1	9.6	8.6	8.1	8.9	8.6	11	9.2	9.7	13.1	10.4	6.9	6.5	7.5	4.9	9.2	12.9	11.8	20.7
XZ009	申扎县	2019-11-14 13:00:00	0.8	1	0.5	0.8	2.2	2.6	5.7	3.9	4.3	6	5.9	6.4	6.9	6.1	9.6	8.7	8.1	8.9	8.6	11	9.2	9.7	13.1	10.4	6.9	6.5	7.5	4.9	9.2	12.9	11.8	20.7
XZ009	申扎县	2019-11-14 14:00:00	0.8	2.3	0.9	1	2.3	2.6	5.6	3.8	4.3	6	5.8	6.4	6.9	6.2	9.6	8.7	8.1	8.9	8.6	11	9.2	9.7	13.2	10.4	6.9	6.5	7.5	4.9	9.2	12.9	11.8	20.7
XZ009	申扎县	2019-11-14 15:00:00	0.9	2.2	1.6	1.3	2.4	2.6	5.4	3.8	4.3	6	5.9	6.4	6.9	6.1	9.6	8.7	8.1	8.9	8.6	11	9.2	9.7	13.1	10.4	6.9	6.5	7.5	4.9	9.2	12.9	11.8	20.7
XZ009	申扎县	2019-11-14 16:00:00	0.9	2.2	1.7	1.5	2.4	2.6	5.4	3.8	4.3	6	5.9	6.4	6.9	6.2	9.6	8.7	8.1	8.9	8.6	11	9.2	9.7	13.1	10.4	6.9	6.5	7.5	4.9	9.2	12.9	11.8	20.7
XZ009	申扎县	2019-11-14 17:00:00	1	2.3	1.7	1.7	2.5	2.7	5.4	3.9	4.3	6	5.9	6.3	6.9	6.1	9.6	8.7	8.1	8.9	8.6	10.9	9.2	9.7	13.1	10.4	6.8	6.5	7.5	4.9	9.2	12.9	11.8	20.7
XZ009	申扎县	2019-11-14 18:00:00	0.9	2.2	1.7	1.7	2.5	2.8	5.4	3.9	4.3	6	5.9	6.4	6.9	6.1	9.6	8.6	8.1	8.9	8.6	10.9	9.2	9.7	13.2	10.4	6.8	6.5	7.5	4.9	9.2	12.8	11.8	20.7
XZ009	申扎县	2019-11-14 19:00:00	0.9	2.2	1.7	1.7	2.5	2.9	5.5	4	4.3	6	5.9	6.4	6.9	6.1	9.6	8.7	8.1	8.9	8.5	11	9.2	9.7	13.1	10.3	6.8	6.5	7.5	4.9	9.2	12.9	11.8	20.7
XZ009	申扎县	2019-11-14 20:00:00	0.8	2.2	1.6	1.7	2.5	2.9	5.5	4	4.3	6	5.9	6.4	6.9	6.1	9.6	8.6	8.1	8.9	8.5	10.9	9.2	9.7	13.1	10.3	6.8	6.5	7.5	4.9	9.2	12.8	11.8	20.7
XZ009	申扎县	2019-11-14 21:00:00	0.7	2.1	1.6	1.7	2.4	2.8	5.4	4	4.4	6	5.9	6.4	6.9	6.1	9.6	8.6	8.1	8.9	8.5	10.9	9.2	9.6	13.1	10.3	6.8	6.5	7.5	4.9	9.2	12.8	11.8	20.7
XZ009	申扎县	2019-11-14 22:00:00	0.6	2	1.6	1.6	2.4	2.8	5.5	4	4.4	6.1	5.9	6.4	7	6.1	9.6	8.6	8.1	8.9	8.5	10.9	9.2	9.6	13.1	10.3	6.8	6.5	7.5	4.9	9.2	12.8	11.7	20.7
XZ009	申扎县	2019-11-14 23:00:00	0.6	2	1.5	1.6	2.4	2.8	5.5	4	4.4	6	5.9	6.4	6.9	6.1	9.6	8.6	8.1	8.9	8.5	10.9	9.2	9.6	13.1	10.3	6.8	6.4	7.5	4.9	9.2	12.8	11.8	20.7
XZ009	申扎县	2019-11-15 00:00:00	0.6	2	1.5	1.6	2.4	2.8	5.5	4	4.3	6	5.9	6.4	6.9	6.1	9.6	8.6	8.1	8.9	8.5	10.9	9.2	9.6	13.1	10.3	6.8	6.4	7.5	4.9	9.2	12.8	11.8	20.7
XZ009	申扎县	2019-11-15 01:00:00	0.5	1.9	1.5	1.5	2.4	2.7	5.4	4	4.3	6	5.9	6.4	6.9	6.1	9.6	8.6	8	8.9	8.5	10.9	9.2	9.6	13.1	10.3	6.8	6.4	7.5	4.9	9.2	12.8	11.7	20.7
XZ009	申扎县	2019-11-15 02:00:00	0.4	1.9	1.5	1.5	2.4	2.7	5.4	4	4.3	6	5.9	6.4	6.9	6.1	9.6	8.6	8.1	8.9	8.5	10.9	9.2	9.6	13.1	10.3	6.8	6.4	7.5	4.9	9.2	12.8	11.7	20.7
XZ009	申扎县	2019-11-15 03:00:00	0.2	1.8	1.3	1.5	2.4	2.7	5.4	3.9	4.3	6	5.9	6.4	6.9	6.1	9.6	8.6	8.1	8.9	8.5	10.9	9.2	9.6	13.1	10.3	6.8	6.4	7.5	4.9	9.2	12.8	11.7	20.7
XZ009	申扎县	2019-11-15 04:00:00	0	1.7	1.2	1.4	2.3	2.7	5.4	3.9	4.3	6	5.9	6.4	6.9	6.1	9.6	8.6	8.1	8.9	8.5	10.9	9.2	9.6	13	10.3	6.8	6.4	7.5	4.9	9.2	12.8	11.7	20.7
XZ009	申扎县	2019-11-15 05:00:00	0	1.5	1.2	1.4	2.3	2.6	5.4	3.9	4.3	6	5.9	6.4	6.9	6.1	9.5	8.6	8.1	8.9	8.5	10.9	9.2	9.6	13	10.3	6.8	6.4	7.5	4.9	9.1	12.8	11.7	20.7
XZ009	申扎县	2019-11-15 06:00:00	0	1.4	1.1	1.4	2.3	2.6	5.5	3.9	4.3	6	5.8	6.3	6.9	6.1	9.6	8.6	8.1	8.8	8.5	10.9	9.2	9.6	13	10.3	6.8	6.4	7.5	4.9	9.2	12.7	11.7	20.7
XZ009	申扎县	2019-11-15 07:00:00	0	1.1	1.1	1.4	2.3	2.6	5.5	3.9	4.3	6	5.8	6.3	6.9	6.1	9.5	8.6	8.1	8.8	8.5	10.9	9.2	9.6	13	10.3	6.8	6.4	7.5	4.9	9.1	12.8	11.7	20.6
XZ009	申扎县	2019-11-15 08:00:00	0	0.8	1.1	1.4	2.3	2.6	5.5	3.9	4.3	6	5.8	6.3	6.9	6.1	9.5	8.6	8.1	8.8	8.5	10.8	9.1	9.6	13	10.3	6.7	6.4	7.5	4.9	9.2	12.8	11.7	20.6
XZ009	申扎县	2019-11-15 09:00:00	0	0.6	1.1	1.4	2.2	2.6	5.5	3.9	4.3	6	5.8	6.3	6.9	6.1	9.5	8.6	8.1	8.8	8.5	10.9	9.1	9.6	13	10.2	6.8	6.4	7.5	4.9	9.1	12.8	11.7	20.7
XZ009	申扎县	2019-11-15 10:00:00	0	0.6	1	1.4	2.3	2.6	5.5	3.8	4.3	6	5.8	6.3	6.9	6.1	9.5	8.6	8	8.9	8.5	10.9	9.1	9.6	13	10.3	6.7	6.4	7.5	4.9	9.1	12.8	11.7	20.6
XZ009	申扎县	2019-11-15 11:00:00	0	0.7	1	1.4	2.3	2.6	5.5	3.8	4.3	5.9	5.8	6.3	6.9	6.1	9.5	8.5	8	8.9	8.5	10.9	9.1	9.6	13	10.3	6.8	6.4	7.5	4.9	9.1	12.8	11.7	20.6
XZ009	申扎县	2019-11-15 12:00:00	0	0.8	1.1	1.4	2.3	2.6	5.5	3.8	4.3	6	5.8	6.3	6.9	6.1	9.5	8.5	8	8.9	8.6	10.9	9.1	9.6	13	10.3	6.8	6.4	7.4	4.9	9.1	12.8	11.7	20.6
XZ009	申扎县	2019-11-15 13:00:00	0.7	1.5	1.3	1.4	2.3	2.6	5.3	3.8	4.3	5.9	5.8	6.3	6.9	6.1	9.5	8.6	8	8.8	8.5	10.9	9.1	9.6	13	10.3	6.8	6.4	7.4	4.9	9.1	12.8	11.7	20.6
XZ009	申扎县	2019-11-15 14:00:00	0.8	2.1	1.5	1.5	2.4	2.6	5.3	3.8	4.3	6	5.8	6.3	6.9	6.1	9.5	8.6	8	8.9	8.5	10.9	9.1	9.6	13	10.3	6.8	6.4	7.5	4.9	9.1	12.7	11.7	20.6
XZ009	申扎县	2019-11-15 15:00:00	0.9	2.2	1.6	1.7	2.4	2.7	5.3	3.8	4.2	5.9	5.8	6.3	6.9	6.1	9.5	8.5	8	8.9	8.5	10.9	9.1	9.6	13	10.3	6.8	6.4	7.5	4.9	9.1	12.8	11.7	20.6
XZ009	申扎县	2019-11-15 16:00:00	0.9	2.2	1.6	1.8	2.5	2.8	5.3	3.9	4.3	5.9	5.8	6.3	6.9	6.1	9.5	8.6	8	8.9	8.5	10.8	9.1	9.6	13	10.3	6.8	6.4	7.4	4.9	9.1	12.8	11.7	20.6
XZ009	申扎县	2019-11-15 17:00:00	0.9	2.2	1.6	1.8	2.5	2.9	5.3	4	4.3	6	5.8	6.3	6.9	6.1	9.5	8.5	8	8.9	8.5	10.9	9.1	9.6	13	10.3	6.7	6.4	7.4	4.9	9.1	12.8	11.7	20.6
XZ009	申扎县	2019-11-15 18:00:00	0.9	2.2	1.6	1.9	2.5	2.9	5.4	4	4.3	6	5.8	6.3	6.9	6.1	9.5	8.5	8	8.8	8.5	10.8	9.1	9.6	13	10.3	6.8	6.4	7.4	4.8	9.1	12.8	11.7	20.6
XZ009	申扎县	2019-11-15 19:00:00	0.8	2.1	1.6	1.8	2.5	2.9	5.4	4	4.4	6	5.8	6.3	6.9	6.1	9.5	8.6	8	8.8	8.5	10.8	9.1	9.6	13	10.2	6.7	6.4	7.4	4.9	9.1	12.8	11.7	20.6
XZ009	申扎县	2019-11-15 20:00:00	0.7	2.1	1.5	1.8	2.5	2.9	5.4	4.1	4.4	6	5.9	6.4	6.9	6.1	9.5	8.5	8	8.8	8.5	10.8	9.1	9.6	13	10.3	6.7	6.3	7.4	4.9	9.1	12.8	11.7	20.6
XZ009	申扎县	2019-11-15 21:00:00	0.6	2	1.5	1.8	2.5	2.9	5.4	4.1	4.4	6	5.9	6.4	6.9	6.1	9.5	8.5	8	8.8	8.4	10.8	9.1	9.6	12.9	10.2	6.7	6.3	7.4	4.9	9.1	12.7	11.6	20.6
XZ009	申扎县	2019-11-15 22:00:00	0.5	1.9	1.5	1.7	2.4	2.9	5.4	4.1	4.4	6	5.9	6.4	6.9	6.1	9.5	8.5	8	8.8	8.4	10.8	9.1	9.5	13	10.2	6.7	6.4	7.4	4.9	9.1	12.7	11.6	20.6
XZ009	申扎县	2019-11-15 23:00:00	0.5	1.9	1.4	1.6	2.4	2.8	5.4	4	4.3	6	5.9	6.4	6.9	6.1	9.5	8.5	8	8.8	8.4	10.8	9.1	9.6	12.9	10.2	6.7	6.3	7.4	4.8	9.1	12.7	11.6	20.6
XZ009	申扎县	2019-11-16 00:00:00	0.3	1.8	1.4	1.6	2.4	2.8	5.4	4	4.3	6	5.9	6.4	6.9	6.1	9.5	8.5	8	8.8	8.4	10.8	9.1	9.6	12.9	10.2	6.7	6.3	7.4	4.8	9.1	12.7	11.6	20.6
XZ009	申扎县	2019-11-16 01:00:00	0.1	1.7	1.2	1.5	2.3	2.7	5.4	4	4.3	6	5.9	6.4	6.9	6.1	9.5	8.5	8	8.8	8.4	10.8	9.1	9.6	12.9	10.2	6.7	6.3	7.4	4.8	9.1	12.7	11.6	20.6
XZ009	申扎县	2019-11-16 02:00:00	0	1.5	1.1	1.5	2.3	2.7	5.4	4	4.3	6	5.8	6.3	6.9	6.1	9.5	8.5	8	8.8	8.4	10.8	9.1	9.5	12.9	10.2	6.7	6.3	7.4	4.8	9.1	12.7	11.6	20.6
XZ009	申扎县	2019-11-16 03:00:00	0	1.4	1.1	1.4	2.3	2.7	5.4	3.9	4.3	6	5.8	6.3	6.9	6.1	9.5	8.5	8	8.8	8.4	10.8	9.1	9.6	12.9	10.2	6.7	6.3	7.4	4.8	9.1	12.7	11.6	20.6
XZ009	申扎县	2019-11-16 04:00:00	0	1	1	1.4	2.3	2.6	5.4	3.9	4.3	6	5.8	6.3	6.9	6.1	9.5	8.5	8	8.8	8.4	10.8	9.1	9.5	12.9	10.2	6.7	6.3	7.4	4.8	9.1	12.7	11.6	20.6
XZ009	申扎县	2019-11-16 05:00:00	0	0.7	1	1.4	2.2	2.6	5.4	3.9	4.3	5.9	5.8	6.3	6.9	6.1	9.5	8.5	8	8.8	8.4	10.8	9.1	9.6	12.9	10.2	6.7	6.3	7.4	4.8	9.1	12.7	11.6	20.6
XZ009	申扎县	2019-11-16 06:00:00	0	0.5	1	1.4	2.2	2.6	5.4	3.9	4.3	5.9	5.8	6.3	6.8	6.1	9.5	8.5	8	8.8	8.4	10.8	9.1	9.6	12.9	10.2	6.7	6.3	7.4	4.8	9.1	12.7	11.6	20.6
XZ009	申扎县	2019-11-16 07:00:00	0	0.5	1	1.4	2.2	2.6	5.4	3.9	4.3	5.9	5.8	6.3	6.8	6.1	9.4	8.5	8	8.8	8.4	10.8	9.1	9.6	12.9	10.2	6.7	6.3	7.4	4.8	9.1	12.7	11.6	20.6
XZ009	申扎县	2019-11-16 08:00:00	0	0.4	0.8	1.4	2.2	2.6	5.5	3.8	4.3	5.9	5.8	6.3	6.8	6.1	9.4	8.5	8	8.8	8.4	10.8	9.1	9.5	12.9	10.2	6.7	6.3	7.4	4.8	9.1	12.7	11.5	20.5
XZ009	申扎县	2019-11-16 09:00:00	0	0.4	0.6	1.4	2.2	2.6	5.5	3.8	4.3	5.9	5.8	6.3	6.8	6.1	9.4	8.5	8	8.8	8.4	10.8	9.1	9.6	12.9	10.2	6.7	6.3	7.4	4.8	9	12.7	11.5	20.5
XZ009	申扎县	2019-11-16 10:00:00	0	0.4	0.4	1.3	2.2	2.5	5.6	3.8	4.3	5.9	5.8	6.3	6.8	6	9.4	8.5	7.9	8.8	8.5	10.8	9.1	9.5	12.9	10.2	6.7	6.3	7.4	4.8	9	12.7	11.6	20.5
XZ009	申扎县	2019-11-16 11:00:00	0	0.5	0.4	1.3	2.2	2.5	5.6	3.8	4.3	5.9	5.8	6.3	6.8	6	9.4	8.5	7.9	8.8	8.5	10.8	9.1	9.5	12.9	10.2	6.7	6.3	7.4	0	9	12.7	11.6	20.5
XZ009	申扎县	2019-11-16 12:00:00	0.1	0.7	0.5	1.3	2.2	2.5	5.5	3.8	4.3	5.9	5.7	6.3	6.8	6	9.4	8.4	7.9	8.8	8.4	10.8	9.1	9.6	12.9	10.2	6.7	6.3	7.4	4.8	9	12.7	11.6	20.5
XZ009	申扎县	2019-11-16 13:00:00	0.6	1.1	0.8	1.3	2.3	2.5	5.4	3.8	4.2	5.9	5.7	6.3	6.8	6.1	9.4	8.5	7.9	8.8	8.5	10.8	9.1	9.5	12.9	10.2	6.7	6.3	7.4	4.8	9.1	12.7	11.6	20.5
XZ009	申扎县	2019-11-16 14:00:00	0.7	2	1.3	1.3	2.3	2.5	5.2	3.8	4.2	5.9	5.7	6.2	6.8	6	9.4	8.5	7.9	8.8	8.4	10.8	9.1	9.5	12.9	10.2	6.7	6.3	7.4	4.8	9.1	12.7	11.6	20.5
XZ009	申扎县	2019-11-16 15:00:00	0.7	2	1.4	1.5	2.4	2.6	5.2	3.8	4.2	5.9	5.7	6.2	6.8	6	9.4	8.5	8	8.8	8.5	10.8	9.1	9.5	12.9	10.2	6.7	6.3	7.3	4.8	9.1	12.7	11.6	20.5
XZ009	申扎县	2019-11-16 16:00:00	0.7	2	1.5	1.6	2.4	2.6	5.2	3.8	4.2	5.9	5.7	6.2	6.8	6	9.4	8.5	7.9	8.8	8.5	10.8	9.1	9.5	12.9	10.2	6.7	6.3	7.4	4.8	9	12.7	11.6	20.5
XZ009	申扎县	2019-11-16 17:00:00	0.7	2	1.5	1.6	2.4	2.7	5.2	3.8	4.2	5.9	5.7	6.2	6.8	6	9.4	8.5	7.9	8.8	8.4	10.7	9	9.5	12.9	10.2	6.7	6.3	7.3	0	9	12.7	11.6	20.5
XZ009	申扎县	2019-11-16 18:00:00	0.7	2	1.5	1.6	2.4	2.7	5.3	3.9	4.2	5.8	5.7	6.2	6.8	6	9.4	8.4	7.9	8.8	8.4	10.7	9	9.5	12.8	10.1	6.7	6.3	7.3	4.8	9	12.7	11.6	20.5
XZ009	申扎县	2019-11-16 19:00:00	0.6	2	1.4	1.6	2.4	2.7	5.3	3.9	4.2	5.9	5.7	6.2	6.8	6	9.4	8.4	7.9	8.7	8.4	10.7	9	9.5	12.8	10.2	6.6	6.3	7.3	4.8	9	12.7	11.6	20.5
XZ009	申扎县	2019-11-16 20:00:00	0.5	1.9	1.4	1.6	2.4	2.7	5.3	3.9	4.2	5.9	5.7	6.2	6.8	6	9.4	8.4	7.9	8.7	8.4	10.7	9.1	9.5	12.9	10.2	6.6	6.3	7.3	4.8	9	12.7	11.5	20.5
XZ009	申扎县	2019-11-16 21:00:00	0.5	1.9	1.4	1.6	2.4	2.7	5.3	3.9	4.2	5.9	5.8	6.2	6.8	6	9.4	8.4	7.9	8.7	8.4	10.7	9	9.5	12.8	10.2	6.6	6.3	7.4	4.7	9	12.6	11.5	20.5
XZ009	申扎县	2019-11-16 22:00:00	0.4	1.8	1.3	1.5	2.4	2.7	5.3	3.9	4.3	5.9	5.7	6.3	6.8	6	9.4	8.4	7.9	8.7	8.4	10.7	9	9.5	12.8	10.1	6.6	6.3	7.4	4.8	9	12.7	11.6	20.5
XZ009	申扎县	2019-11-16 23:00:00	0.4	1.8	1.3	1.5	2.3	2.7	5.3	3.9	4.2	5.9	5.7	6.2	6.8	6	9.4	8.4	7.9	8.7	8.4	10.7	9	9.5	12.8	10.1	6.6	6.3	7.3	4.8	9	12.6	11.6	20.5
XZ009	申扎县	2019-11-17 00:00:00	0.3	1.8	1.3	1.4	2.3	2.6	5.3	3.9	4.2	5.9	5.7	6.3	6.8	6	9.4	8.4	7.9	8.7	8.4	10.7	9	9.5	12.8	10.2	6.6	6.3	7.3	4.8	9	12.6	11.5	20.5
XZ009	申扎县	2019-11-17 01:00:00	0.3	1.7	1.3	1.4	2.3	2.6	5.3	3.8	4.2	5.9	5.7	6.2	6.8	6	9.4	8.4	7.9	8.7	8.3	10.7	9	9.5	12.8	10.1	6.6	6.3	7.3	4.8	9	12.7	11.5	20.5
XZ009	申扎县	2019-11-17 02:00:00	0.1	1.6	1.2	1.4	2.3	2.6	5.3	3.8	4.2	5.9	5.7	6.2	6.8	6	9.4	8.4	7.9	8.7	8.3	10.7	9	9.5	12.8	10.1	6.6	6.2	7.3	4.8	9	12.7	11.5	20.5
XZ009	申扎县	2019-11-17 03:00:00	0	1.5	1.1	1.4	2.3	2.6	5.3	3.8	4.2	5.9	5.7	6.2	6.8	6	9.4	8.4	7.9	8.7	8.3	10.7	9	9.5	12.8	10.1	6.6	6.3	7.3	4.8	9	12.6	11.5	20.5
XZ009	申扎县	2019-11-17 04:00:00	0	1.3	1	1.4	2.3	2.6	5.3	3.8	4.2	5.9	5.7	6.2	6.8	6	9.4	8.4	7.9	8.7	8.3	10.7	9	9.4	12.8	10.1	6.6	6.2	7.3	4.8	9	12.6	11.5	20.5
XZ009	申扎县	2019-11-17 05:00:00	0	0.9	1	1.3	2.2	2.5	5.3	3.8	4.2	5.8	5.7	6.2	6.7	6	9.4	8.4	7.9	8.7	8.3	10.7	9	9.5	12.8	10.1	6.6	6.2	7.3	4.8	9	12.6	11.5	20.5
XZ009	申扎县	2019-11-17 06:00:00	0	0.6	1	1.4	2.2	2.5	5.3	3.8	4.2	5.9	5.7	6.2	6.7	6	9.4	8.4	7.9	8.7	8.3	10.7	9	9.4	12.7	10.1	6.6	6.2	7.3	4.8	9	12.7	11.5	20.4
XZ009	申扎县	2019-11-17 07:00:00	0	0.4	0.9	1.3	2.2	2.5	5.3	3.8	4.2	5.9	5.7	6.2	6.7	6	9.3	8.4	7.9	8.7	8.3	10.7	8.9	9.5	12.8	10.1	6.6	6.2	7.3	4.8	9	12.6	11.5	20.4
XZ009	申扎县	2019-11-17 08:00:00	0	0.3	0.7	1.3	2.2	2.5	5.4	3.8	4.2	5.9	5.7	6.2	6.7	6	9.4	8.3	7.9	8.7	8.3	10.7	9	9.4	12.7	10.1	6.6	6.2	7.3	4.8	9	12.6	11.5	20.5
XZ009	申扎县	2019-11-17 09:00:00	0	0.3	0.4	1.3	2.1	2.5	5.4	3.8	4.2	5.8	5.7	6.2	6.7	6	9.3	8.3	7.9	8.7	8.3	10.7	9	9.4	12.7	10.1	6.6	6.2	7.3	4.7	9	12.6	11.5	20.4
XZ009	申扎县	2019-11-17 10:00:00	0	0.3	0.3	1.2	2.1	2.5	5.5	3.7	4.2	5.8	5.7	6.2	6.7	6	9.3	8.3	7.9	8.7	8.4	10.6	9	9.4	12.7	10	6.6	6.2	7.3	4.7	9	12.6	11.5	20.4
XZ009	申扎县	2019-11-17 11:00:00	0	0.4	0.3	1.1	2.1	2.5	5.5	3.7	4.2	5.8	5.7	6.2	6.7	6	9.3	8.3	7.9	8.7	8.4	10.7	9	9.4	12.7	10.1	6.6	6.2	7.3	4.8	9	12.6	11.5	20.4
XZ009	申扎县	2019-11-17 12:00:00	0	0.6	0.4	1.1	2.1	2.5	5.4	3.7	4.2	5.8	5.7	6.2	6.7	6	9.3	8.4	7.9	8.7	8.4	10.6	9	9.4	12.7	10.1	6.6	6.2	7.3	4.7	9	12.6	11.5	20.4
XZ009	申扎县	2019-11-17 13:00:00	0.5	0.9	0.6	1.1	2.2	2.5	5.4	3.7	4.2	5.8	5.7	6.2	6.7	6	9.3	8.3	7.9	8.7	8.4	10.7	9	9.4	12.7	10	6.6	6.2	7.3	4.7	9	12.6	11.4	20.4
XZ009	申扎县	2019-11-17 14:00:00	0.6	2	0.9	1.2	2.3	2.4	5.2	3.7	4.1	5.8	5.7	6.1	6.7	5.9	9.3	8.4	7.8	8.7	8.4	10.7	9	9.4	12.7	10.1	6.6	6.2	7.3	4.8	9	12.6	11.5	20.4
XZ009	申扎县	2019-11-17 15:00:00	0.6	1.9	1.4	1.4	2.3	2.5	5.1	3.7	4.1	5.8	5.6	6.2	6.7	5.9	9.3	8.4	7.8	8.7	8.4	10.6	9	9.4	12.7	10.1	6.6	6.2	7.3	4.7	9	12.6	11.5	20.4
XZ009	申扎县	2019-11-17 16:00:00	0.7	2	1.5	1.5	2.3	2.6	5.1	3.7	4.2	5.8	5.7	6.2	6.7	5.9	9.3	8.4	7.8	8.7	8.4	10.6	9	9.4	12.7	10.1	6.6	6.2	7.3	4.7	9	12.6	11.5	20.4
XZ009	申扎县	2019-11-17 17:00:00	0.7	2	1.5	1.6	2.4	2.6	5.2	3.8	4.2	5.8	5.7	6.2	6.7	5.9	9.3	8.4	7.8	8.7	8.4	10.6	9	9.4	12.7	10.1	6.6	6.2	7.3	4.7	9	12.6	11.5	20.4
XZ009	申扎县	2019-11-17 18:00:00	0.7	2	1.5	1.6	2.4	2.7	5.2	3.8	4.2	5.8	5.7	6.2	6.7	5.9	9.3	8.4	7.8	8.7	8.3	10.6	9	9.4	12.7	10	6.6	6.2	7.2	4.7	8.9	12.6	11.5	20.4
XZ009	申扎县	2019-11-17 19:00:00	0.6	2	1.5	1.7	2.4	2.7	5.2	3.9	4.2	5.8	5.7	6.1	6.7	5.9	9.3	8.3	7.8	8.7	8.3	10.6	9	9.4	12.7	10	6.5	6.2	7.2	4.7	9	12.6	11.5	20.4
XZ009	申扎县	2019-11-17 20:00:00	0.5	1.9	1.4	1.6	2.4	2.7	5.2	3.9	4.2	5.8	5.7	6.2	6.7	5.9	9.3	8.3	7.8	8.6	8.3	10.6	9	9.4	12.7	10	6.5	6.2	7.2	4.7	9	12.6	11.5	20.4
XZ009	申扎县	2019-11-17 21:00:00	0.4	1.8	1.3	1.6	2.3	2.7	5.2	3.9	4.2	5.9	5.7	6.2	6.7	5.9	9.3	8.3	7.8	8.6	8.3	10.6	9	9.4	12.7	10	6.5	6.2	7.2	4.7	9	12.6	11.5	20.4
XZ009	申扎县	2019-11-17 22:00:00	0.2	1.7	1.2	1.5	2.3	2.6	5.2	3.9	4.2	5.9	5.7	6.2	6.7	5.9	9.3	8.3	7.8	8.7	8.3	10.6	8.9	9.3	12.7	10	6.5	6.2	7.2	4.7	8.9	12.6	11.5	20.4
XZ009	申扎县	2019-11-17 23:00:00	0	1.5	1.1	1.4	2.3	2.6	5.3	3.8	4.2	5.9	5.7	6.2	6.7	5.9	9.3	8.3	7.8	8.7	8.3	10.6	8.9	9.3	12.7	10	6.5	6.2	7.2	4.7	9	12.6	11.5	20.4
XZ009	申扎县	2019-11-18 00:00:00	0	1.2	1	1.4	2.2	2.6	5.3	3.8	4.2	5.8	5.7	6.2	6.7	5.9	9.3	8.3	7.8	8.6	8.3	10.6	8.9	9.4	12.7	10	6.5	6.2	7.2	4.7	8.9	12.6	11.5	20.4
XZ009	申扎县	2019-11-18 01:00:00	0	0.6	1	1.3	2.2	2.5	5.3	3.8	4.2	5.8	5.7	6.2	6.7	5.9	9.3	8.3	7.8	8.6	8.3	10.6	8.9	9.3	12.7	10	6.5	6.2	7.2	4.7	9	12.6	11.4	20.4
XZ009	申扎县	2019-11-18 02:00:00	0	0.4	0.9	1.3	2.1	2.5	5.3	3.8	4.2	5.8	5.7	6.2	6.7	5.9	9.3	8.3	7.8	8.6	8.3	10.6	8.9	9.3	12.6	10	6.5	6.2	7.2	4.7	8.9	12.6	11.4	20.4
XZ009	申扎县	2019-11-18 03:00:00	0	0.3	0.7	1.3	2.1	2.5	5.4	3.8	4.2	5.8	5.6	6.2	6.7	5.9	9.3	8.3	7.8	8.6	8.3	10.6	8.9	9.3	12.6	10	6.5	6.2	7.2	4.7	8.9	12.6	11.4	20.4
XZ009	申扎县	2019-11-18 04:00:00	0	0.2	0.4	1.2	2.1	2.5	5.4	3.8	4.2	5.8	5.6	6.2	6.7	5.9	9.3	8.3	7.8	8.6	8.2	10.6	8.9	9.3	12.6	10	6.5	6.1	7.2	4.7	8.9	12.6	11.4	20.4
XZ009	申扎县	2019-11-18 05:00:00	0	0.2	0.3	1.1	2	2.5	5.5	3.7	4.2	5.8	5.6	6.1	6.7	5.9	9.3	8.3	7.8	8.6	8.2	10.6	8.9	9.3	12.6	10	6.5	6.2	7.2	4.7	8.9	12.5	11.4	20.4
XZ009	申扎县	2019-11-18 06:00:00	0	0.1	0.2	0.9	2	2.4	5.5	3.7	4.2	5.8	5.6	6.1	6.6	5.9	9.3	8.3	7.8	8.6	8.2	10.6	8.9	9.3	12.6	10	6.5	6.1	7.1	4.7	8.9	12.6	11.4	20.4
XZ009	申扎县	2019-11-18 07:00:00	0	0.1	0.1	0.6	1.9	2.4	5.6	3.7	4.2	5.8	5.6	6.1	6.6	5.9	9.3	8.3	7.8	8.6	8.2	10.5	8.9	9.3	12.6	10	6.5	6.1	7.2	4.7	8.9	12.6	11.4	20.4
XZ009	申扎县	2019-11-18 08:00:00	0	0.1	0.1	0.3	1.9	2.4	5.6	3.7	4.2	5.8	5.6	6.1	6.6	5.9	9.2	8.2	7.8	8.5	8.2	10.6	8.9	9.3	12.6	10	6.5	6.1	7.2	4.7	8.9	12.5	11.4	20.4
XZ009	申扎县	2019-11-18 09:00:00	0	0	0	0.1	1.8	2.4	5.7	3.7	4.2	5.8	5.6	6.1	6.6	5.9	9.3	8.2	7.8	8.5	8.2	10.6	8.9	9.3	12.6	10	6.5	6.1	7.2	4.7	8.9	12.5	11.4	20.3
XZ009	申扎县	2019-11-18 10:00:00	0	0.1	0	0.1	1.5	2.4	5.7	3.7	4.2	5.8	5.6	6.1	6.6	5.9	9.2	8.2	7.8	8.6	8.3	10.6	8.9	9.3	12.6	9.9	6.5	6.1	7.1	4.7	8.9	12.5	11.4	20.3
XZ009	申扎县	2019-11-18 11:00:00	0	0.1	0	0.1	1.1	2.3	5.8	3.7	4.2	5.8	5.6	6.1	6.6	5.9	9.2	8.2	7.8	8.6	8.3	10.5	8.9	9.3	12.6	9.9	6.5	6.1	7.2	4.7	8.9	12.5	11.4	20.3
XZ009	申扎县	2019-11-18 12:00:00	0	0.2	0.1	0.1	1	2.3	5.8	3.6	4.1	5.8	5.6	6.1	6.6	5.9	9.3	8.2	7.8	8.6	8.3	10.6	8.9	9.3	12.6	9.9	6.5	6.1	7.2	4.7	8.9	12.6	11.4	20.3
XZ009	申扎县	2019-11-18 13:00:00	0.2	0.4	0.2	0.1	1	2.2	5.8	3.6	4.1	5.8	5.6	6.1	6.6	5.9	9.2	8.2	7.8	8.6	8.3	10.5	8.9	9.3	12.6	9.9	6.5	6.1	7.2	4.7	8.9	12.5	11.4	20.3
XZ009	申扎县	2019-11-18 14:00:00	0.6	1.2	0.3	0.2	1.1	2.2	5.8	3.6	4.1	5.8	5.6	6.1	6.6	5.9	9.2	8.2	7.8	8.6	8.3	10.5	8.9	9.3	12.6	10	6.5	6.1	7.2	4.7	8.9	12.5	11.4	20.3
XZ009	申扎县	2019-11-18 15:00:00	0.5	2.1	0.5	0.3	1.2	2.2	5.7	3.6	4.1	5.7	5.6	6.1	6.6	5.9	9.3	8.3	7.8	8.6	8.3	10.6	8.9	9.3	12.6	9.9	6.5	6.1	7.2	4.7	8.9	12.5	11.4	20.3
XZ009	申扎县	2019-11-18 16:00:00	0.6	2	1.4	0.4	1.4	2.2	5.5	3.6	4.1	5.7	5.6	6.1	6.6	5.9	9.3	8.3	7.8	8.6	8.3	10.5	8.9	9.3	12.6	10	6.5	6.1	7.2	4.7	8.9	12.5	11.4	20.3
XZ009	申扎县	2019-11-18 17:00:00	0.6	1.9	1.5	0.9	1.7	2.2	5.4	3.6	4	5.7	5.6	6.1	6.6	5.9	9.2	8.3	7.8	8.6	8.3	10.5	8.9	9.3	12.6	9.9	6.5	6.1	7.2	4.7	8.9	12.5	11.4	20.3
XZ009	申扎县	2019-11-18 18:00:00	0.6	2	1.4	1.4	2.1	2.2	5.2	3.6	4.1	5.7	5.6	6.1	6.6	5.9	9.2	8.3	7.8	8.6	8.3	10.5	8.9	9.2	12.5	9.9	6.5	6.1	7.2	4.7	8.9	12.5	11.4	20.3
XZ009	申扎县	2019-11-18 19:00:00	0.5	1.9	1.4	1.5	2.3	2.3	5	3.6	4	5.7	5.6	6	6.6	5.8	9.2	8.2	7.8	8.6	8.2	10.5	8.9	9.3	12.6	9.9	6.4	6.1	7.2	4.7	8.9	12.5	11.4	20.3
XZ009	申扎县	2019-11-18 20:00:00	0.4	1.8	1.3	1.4	2.3	2.3	5	3.6	4.1	5.7	5.5	6	6.6	5.8	9.2	8.3	7.8	8.6	8.2	10.5	8.9	9.3	12.6	9.9	6.5	6.1	7.2	4.7	8.9	12.5	11.4	20.3
XZ009	申扎县	2019-11-18 21:00:00	0.1	1.6	1.2	1.4	2.3	2.3	5	3.6	4.1	5.7	5.5	6	6.6	5.8	9.2	8.3	7.7	8.6	8.2	10.5	8.9	9.2	12.5	9.9	6.4	6.1	7.2	4.6	8.9	12.5	11.4	20.3
XZ009	申扎县	2019-11-18 22:00:00	0	1.3	1	1.3	2.2	2.3	5.1	3.6	4.1	5.7	5.5	6	6.6	5.8	9.2	8.2	7.7	8.5	8.2	10.5	8.9	9.2	12.5	9.9	6.5	6.1	7.1	4.6	8.8	12.5	11.4	20.3
XZ009	申扎县	2019-11-18 23:00:00	0	0.7	1	1.3	2.1	2.3	5.1	3.6	4.1	5.7	5.6	6	6.6	5.8	9.2	8.2	7.7	8.5	8.2	10.5	8.8	9.2	12.5	9.9	6.4	6.1	7.1	4.6	8.8	12.5	11.3	20.3
XZ009	申扎县	2019-11-19 00:00:00	0	0.4	1	1.4	2.1	2.3	5.2	3.6	4.1	5.7	5.6	6	6.6	5.8	9.2	8.2	7.7	8.5	8.1	10.5	8.8	9.2	12.5	9.9	6.4	6.1	7.1	4.7	8.8	12.5	11.3	20.3
XZ009	申扎县	2019-11-19 01:00:00	0	0.3	0.6	1.3	2.1	2.3	5.2	3.6	4.1	5.7	5.5	6	6.6	5.8	9.2	8.2	7.7	8.5	8.2	10.5	8.8	9.2	12.5	9.9	6.4	6.1	7.1	4.7	8.8	12.5	11.3	20.3
XZ009	申扎县	2019-11-19 02:00:00	0	0.3	0.4	1.2	2	2.3	5.3	3.6	4.1	5.7	5.5	6	6.6	5.8	9.2	8.2	7.7	8.5	8.2	10.5	8.8	9.2	12.5	9.9	6.4	6.1	7.1	4.6	8.8	12.5	11.3	20.3
XZ009	申扎县	2019-11-19 03:00:00	0	0.2	0.2	1.1	2	2.3	5.4	3.6	4.1	5.7	5.5	6	6.6	5.8	9.2	8.2	7.7	8.5	8.1	10.4	8.8	9.2	12.5	9.9	6.4	6.1	7.1	4.6	8.8	12.5	11.3	20.3
XZ009	申扎县	2019-11-19 04:00:00	0	0.2	0.2	0.8	1.9	2.3	5.5	3.6	4.1	5.7	5.5	6	6.5	5.8	9.2	8.2	7.7	8.5	8.2	10.4	8.8	9.2	12.5	9.9	6.4	6.1	7.1	4.6	8.8	12.4	11.3	20.3
XZ009	申扎县	2019-11-19 05:00:00	0	0.1	0.1	0.5	1.9	2.3	5.5	3.6	4.1	5.7	5.5	6	6.5	5.8	9.2	8.2	7.7	8.5	8.1	10.4	8.8	9.2	12.5	9.8	6.4	6	7.1	4.6	8.8	12.4	11.3	20.3
XZ009	申扎县	2019-11-19 06:00:00	0	0.1	0.1	0.2	1.8	2.3	5.6	3.6	4.1	5.7	5.5	6	6.6	5.8	9.2	8.2	7.7	8.5	8.1	10.4	8.8	9.2	12.5	9.9	6.4	6	7.1	4.6	8.8	12.4	11.3	20.3
XZ009	申扎县	2019-11-19 07:00:00	0	0	0	0.1	1.6	2.3	5.6	3.6	4.1	5.7	5.5	6	6.5	5.8	9.2	8.1	7.7	8.5	8.1	10.4	8.8	9.1	12.4	9.8	6.4	6	7.1	4.6	8.8	12.4	11.3	20.3
XZ009	申扎县	2019-11-19 08:00:00	0	0	0	0	1.2	2.2	5.7	3.6	4.1	5.7	5.5	6	6.5	5.8	9.2	8.1	7.7	8.5	8.1	10.5	8.8	9.1	12.4	9.8	6.4	6	7.1	4.6	8.8	12.4	11.3	20.2
XZ009	申扎县	2019-11-19 09:00:00	0	0	0	0	0.8	2.2	5.8	3.6	4.1	5.7	5.5	6	6.5	5.8	9.2	8.1	7.7	8.4	8.1	10.4	8.8	9.2	12.4	9.8	6.4	6	7.1	4.6	8.8	12.4	11.3	20.2
XZ009	申扎县	2019-11-19 10:00:00	0	0	0	0	0.6	2	5.8	3.6	4.1	5.7	5.5	6	6.5	5.8	9.2	8.1	7.7	8.5	8.2	10.4	8.8	9.1	12.4	9.8	6.4	6	7.1	4.6	8.8	12.4	11.3	20.2
XZ009	申扎县	2019-11-19 11:00:00	0	0.1	0	0	0.5	1.7	5.8	3.6	4.1	5.7	5.5	6	6.5	5.8	9.1	8.1	7.7	8.5	8.2	10.4	8.7	9.1	12.4	9.8	6.4	6	7.1	4.6	8.8	12.4	11.3	20.2
XZ009	申扎县	2019-11-19 12:00:00	0	0.2	0	0	0.6	1.3	5.7	3.7	4.1	5.7	5.5	6	6.5	5.8	9.1	8.1	7.7	8.5	8.2	10.5	8.8	9.2	12.4	9.9	6.4	6.1	7.1	4.6	8.8	12.4	11.3	20.2
XZ009	申扎县	2019-11-19 13:00:00	0	0.3	0.1	0	0.6	1.1	5.5	3.7	4	5.7	5.5	6	6.5	5.8	9.2	8.1	7.7	8.5	8.2	10.4	8.8	9.1	12.5	9.8	6.4	6	7.1	4.6	8.8	12.4	11.2	20.2
XZ009	申扎县	2019-11-19 14:00:00	0.5	0.7	0.2	0.1	0.7	1.1	5.4	3.7	4	5.7	5.5	6	6.5	5.8	9.2	8.1	7.7	8.5	8.2	10.4	8.8	9.2	12.4	9.8	6.4	6	7.1	4.6	8.8	12.4	11.3	20.2
XZ009	申扎县	2019-11-19 15:00:00	0.5	1.8	0.3	0.1	0.7	1.1	5.4	3.7	4	5.7	5.5	6	6.5	5.8	9.2	8.1	7.7	8.6	8.2	10.4	8.8	9.1	12.4	9.8	6.4	6	7.1	4.6	8.7	12.4	11.3	20.2
XZ009	申扎县	2019-11-19 16:00:00	0.6	2.2	0.8	0.2	0.8	1.2	5.4	3.7	3.9	5.7	5.5	6	6.5	5.8	9.2	8.2	7.7	8.5	8.2	10.4	8.8	9.2	12.4	9.8	6.4	6	7.1	4.6	8.8	12.4	11.2	20.2
XZ009	申扎县	2019-11-19 17:00:00	0.6	2	1.6	0.3	0.9	1.4	5.3	3.6	3.9	5.6	5.5	6	6.5	5.8	9.2	8.2	7.7	8.5	8.2	10.4	8.8	9.2	12.4	9.8	6.4	6.1	7.1	4.6	8.8	12.4	11.2	20.2
XZ009	申扎县	2019-11-19 18:00:00	0.6	1.9	1.6	0.7	1	1.5	5.3	3.6	3.9	5.6	5.5	6	6.5	5.8	9.1	8.2	7.7	8.5	8.2	10.4	8.8	9.1	12.5	9.8	6.4	6	7.1	4.6	8.8	12.4	11.3	20.2
XZ009	申扎县	2019-11-19 19:00:00	0.5	1.9	1.4	1.1	1.1	1.6	5.3	3.5	3.9	5.6	5.5	6	6.5	5.8	9.1	8.2	7.6	8.5	8.1	10.4	8.8	9.2	12.4	9.8	6.4	6	7	4.6	8.7	12.4	11.3	20.2
XZ009	申扎县	2019-11-19 20:00:00	0.3	1.8	1.4	1.1	1.2	1.7	5.2	3.5	3.9	5.6	5.5	5.9	6.5	5.8	9.1	8.2	7.7	8.5	8.1	10.4	8.8	9.1	12.4	9.8	6.4	6.1	7.1	4.6	8.8	12.4	11.2	20.2
XZ009	申扎县	2019-11-19 21:00:00	0	1.4	1.1	1.1	1.3	1.8	5.2	3.5	3.9	5.6	5.5	5.9	6.5	5.8	9.1	8.1	7.7	8.5	8.1	10.4	8.8	9.1	12.4	9.8	6.3	6.1	7.1	4.6	8.7	12.4	11.2	20.2
XZ009	申扎县	2019-11-19 22:00:00	0	0.8	1	1	1.3	1.9	5.1	3.5	3.9	5.6	5.4	5.9	6.5	5.7	9.1	8.1	7.7	8.5	8.1	10.4	8.7	9.1	12.4	9.8	6.3	6	7.1	4.6	8.8	12.4	11.2	20.2
XZ009	申扎县	2019-11-19 23:00:00	0	0.5	0.8	1	1.3	1.9	5.1	3.5	4	5.6	5.5	5.9	6.5	5.8	9.1	8.1	7.7	8.4	8.1	10.3	8.8	9.1	12.4	9.8	6.4	6	7.1	4.6	8.8	12.4	11.2	20.2
XZ009	申扎县	2019-11-20 00:00:00	0	0.4	0.5	0.9	1.3	2	5.2	3.5	4	5.6	5.5	5.9	6.5	5.8	9.1	8.1	7.6	8.4	8.1	10.3	8.7	9.1	12.4	9.8	6.4	6	7	4.6	8.7	12.3	11.2	20.2
XZ009	申扎县	2019-11-20 01:00:00	0	0.3	0.3	0.8	1.4	2	5.2	3.5	4	5.6	5.5	5.9	6.5	5.8	9.1	8.1	7.7	8.4	8.1	10.3	8.7	9.1	12.4	9.8	6.3	6	7	4.6	8.8	12.4	11.2	20.2
XZ009	申扎县	2019-11-20 02:00:00	0	0.2	0.2	0.5	1.4	2	5.3	3.5	4	5.6	5.5	6	6.5	5.7	9.1	8.1	7.7	8.4	8.1	10.3	8.7	9.1	12.3	9.7	6.3	6	7	4.6	8.7	12.4	11.2	20.2
XZ009	申扎县	2019-11-20 03:00:00	0	0.1	0.1	0.3	1.4	2.1	5.3	3.5	4	5.6	5.4	5.9	6.5	5.8	9.1	8.1	7.7	8.4	8.1	10.3	8.7	9	12.4	9.7	6.3	6	7	4.6	8.7	12.4	11.2	20.2
XZ009	申扎县	2019-11-20 04:00:00	0	0.1	0.1	0.2	1.3	2	5.4	3.5	4	5.6	5.4	6	6.5	5.8	9	8.1	7.7	8.4	8.1	10.3	8.7	9	12.4	9.7	6.3	6	7	4.6	8.7	12.4	11.2	20.2
XZ009	申扎县	2019-11-20 05:00:00	0	0.1	0	0.1	1	2	5.5	3.5	4	5.6	5.4	5.9	6.4	5.7	9.1	8.1	7.6	8.4	8	10.3	8.7	9	12.3	9.7	6.3	6	7	4.5	8.7	12.3	11.2	20.2
XZ009	申扎县	2019-11-20 06:00:00	0	0	0	0	0.8	1.9	5.6	3.5	4	5.6	5.5	6	6.4	5.8	9.1	8.1	7.6	8.4	8	10.3	8.7	9	12.3	9.7	6.3	6	7	4.6	8.7	12.3	11.2	20.2
XZ009	申扎县	2019-11-20 07:00:00	0	0	0	0	0.7	1.8	5.6	3.5	4	5.6	5.4	6	6.4	5.7	9.1	8.1	7.6	8.4	8	10.3	8.7	9	12.3	9.7	6.3	6	7	4.6	8.7	12.3	11.2	20.2
XZ009	申扎县	2019-11-20 08:00:00	0	0	0	0	0.6	1.4	5.6	3.6	4	5.6	5.4	6	6.4	5.7	9.1	8	7.6	8.4	8	10.3	8.7	9	12.3	9.7	6.3	6	7	4.5	8.7	12.3	11.2	20.2
XZ009	申扎县	2019-11-20 09:00:00	0	0	0	0	0.5	0.9	5.4	3.7	4	5.7	5.4	6	6.4	5.7	9.1	8	7.6	8.3	8	10.2	8.7	9	12.3	9.7	6.3	6	7	4.6	8.7	12.3	11.2	20.2
XZ009	申扎县	2019-11-20 10:00:00	0	0	0	0	0.4	0.5	5.1	3.8	4.1	5.6	5.4	6	6.4	5.7	9.1	8	7.6	8.4	8.2	10.3	8.7	9	12.3	9.7	6.3	6	7	4.5	8.7	12.3	11.2	20.1
XZ009	申扎县	2019-11-20 11:00:00	0	0.1	0	0	0.4	0.3	4.7	3.8	4.1	5.6	5.4	5.9	6.4	5.7	9.1	8	7.6	8.3	8.1	10.3	8.6	8.9	12.3	9.7	6.3	6	7	4.5	8.7	12.3	11.2	20.1
XZ009	申扎县	2019-11-20 12:00:00	0	0.2	0	0	0.4	0.3	4.2	3.7	4	5.6	5.4	5.9	6.4	5.7	9.1	8	7.6	8.3	8.1	10.3	8.7	9	12.3	9.7	6.3	6	7	4.5	8.7	12.3	11.1	20.1
XZ009	申扎县	2019-11-20 13:00:00	0.1	0.4	0.1	0	0.5	0.3	3.9	3.7	4	5.6	5.4	6	6.4	5.7	9.1	8	7.6	8.4	8.1	10.3	8.7	9	12.3	9.7	6.3	6	7	4.5	8.7	12.3	11.2	20.1
XZ009	申扎县	2019-11-20 14:00:00	0.6	0.8	0.2	0	0.5	0.4	3.7	3.6	3.9	5.6	5.4	5.9	6.4	5.7	9.1	8.1	7.6	8.4	8.1	10.3	8.7	9	12.3	9.7	6.3	6	7	4.5	8.7	12.3	11.2	20.1
XZ009	申扎县	2019-11-20 15:00:00	0.5	1.9	0.3	0.1	0.6	0.4	3.7	3.6	3.8	5.6	5.4	5.9	6.4	5.7	9.1	8	7.6	8.4	8.1	10.3	8.7	9	12.3	9.7	6.3	6	7	4.5	8.7	12.3	11.1	20.1
XZ009	申扎县	2019-11-20 16:00:00	0.6	2.3	0.8	0.2	0.7	0.4	3.7	3.5	3.8	5.6	5.4	5.9	6.4	5.7	9.1	8.1	7.6	8.4	8.1	10.3	8.7	9	12.4	9.7	6.3	6	7	4.5	8.7	12.3	11.1	20.1
XZ009	申扎县	2019-11-20 17:00:00	0.6	2.1	1.8	0.3	0.7	0.5	3.8	3.5	3.8	5.6	5.4	5.9	6.4	5.7	9.1	8.1	7.6	8.4	8.1	10.3	8.7	9	12.3	9.7	6.3	6	7	4.5	8.7	12.3	11.1	20.1
XZ009	申扎县	2019-11-20 18:00:00	0.5	2	1.7	0.6	0.8	0.5	3.9	3.5	3.8	5.6	5.4	5.9	6.4	5.7	9.1	8.1	7.6	8.4	8.1	10.3	8.7	9	12.3	9.7	6.3	6	7	4.5	8.7	12.3	11.1	20.1
XZ009	申扎县	2019-11-20 19:00:00	0.5	1.9	1.5	1	0.9	0.6	4	3.5	3.8	5.5	5.4	5.9	6.4	5.7	9.1	8.1	7.6	8.4	8.1	10.2	8.7	9	12.3	9.7	6.3	6	7	4.5	8.7	12.3	11.1	20.1
XZ009	申扎县	2019-11-20 20:00:00	0.4	1.9	1.4	1.1	1	0.6	4.2	3.5	3.8	5.5	5.4	5.9	6.4	5.7	9	8	7.6	8.4	8	10.2	8.7	9	12.3	9.7	6.3	6	7	4.5	8.7	12.3	11.1	20.1
XZ009	申扎县	2019-11-20 21:00:00	0.1	1.7	1.2	1	1.1	0.7	4.3	3.5	3.8	5.5	5.4	5.9	6.4	5.7	9	8	7.6	8.4	8.1	10.2	8.7	9	12.3	9.7	6.3	5.9	7	4.5	8.7	12.3	11.1	20.1
XZ009	申扎县	2019-11-20 22:00:00	0	1.3	1.1	0.9	1.1	0.8	4.5	3.4	3.8	5.5	5.4	5.9	6.4	5.7	9	8	7.6	8.4	8	10.2	8.7	9	12.3	9.7	6.3	6	7	4.5	8.7	12.3	11.1	20.1
XZ009	申扎县	2019-11-20 23:00:00	0	0.8	1.1	0.9	1.1	0.9	4.6	3.5	3.8	5.5	5.4	5.9	6.4	5.7	9	8	7.6	8.4	8	10.2	8.7	8.9	12.3	9.7	6.3	5.9	7	4.5	8.7	12.3	11.1	20.1
XZ009	申扎县	2019-11-21 00:00:00	0	0.6	0.8	0.9	1.1	0.9	4.7	3.4	3.8	5.5	5.4	5.9	6.4	5.7	9	8	7.6	8.4	8	10.2	8.7	9	12.3	9.7	6.3	5.9	7	4.5	8.7	12.3	11.1	20.1
XZ009	申扎县	2019-11-21 01:00:00	0	0.5	0.5	0.9	1.1	1	4.8	3.4	3.8	5.5	5.4	5.9	6.4	5.7	9	8	7.6	8.3	8	10.2	8.6	8.9	12.2	9.7	6.3	5.9	7	4.5	8.7	12.3	11.1	20.1
XZ009	申扎县	2019-11-21 02:00:00	0	0.4	0.3	0.7	1	1.1	4.9	3.4	3.8	5.5	5.4	5.9	6.4	5.7	9	8	7.6	8.3	8	10.2	8.6	8.9	12.2	9.7	6.3	5.9	7	4.5	8.7	12.2	11.1	20.1
XZ009	申扎县	2019-11-21 03:00:00	0	0.3	0.2	0.6	1	1.2	5	3.4	3.8	5.5	5.3	5.9	6.4	5.7	9	8	7.6	8.3	8	10.2	8.6	8.9	12.2	9.6	6.2	5.9	6.9	4.5	8.7	12.3	11.1	20.1
XZ009	申扎县	2019-11-21 04:00:00	0	0.2	0.2	0.4	1	1.3	5	3.4	3.8	5.5	5.4	5.9	6.4	5.7	9	8	7.6	8.3	8	10.2	8.6	8.9	12.2	9.6	6.2	5.9	7	4.5	8.7	12.3	11.1	20.1
XZ009	申扎县	2019-11-21 05:00:00	0	0.2	0.1	0.2	0.9	1.4	5.1	3.4	3.8	5.5	5.4	5.9	6.4	5.7	9	8	7.6	8.3	8	10.2	8.6	8.9	12.2	9.6	6.2	5.9	6.9	4.5	8.7	12.3	11.1	20.1
XZ009	申扎县	2019-11-21 06:00:00	0	0.1	0.1	0.1	0.8	1.4	5.1	3.4	3.9	5.5	5.3	5.9	6.4	5.7	9	8	7.6	8.3	8	10.2	8.6	8.9	12.2	9.7	6.2	5.9	6.9	4.5	8.7	12.3	11.1	20.1
XZ009	申扎县	2019-11-21 07:00:00	0	0.1	0	0.1	0.7	1.3	5.1	3.4	3.9	5.5	5.4	5.9	6.4	5.7	9	8	7.6	8.3	8	10.2	8.6	8.9	12.2	9.6	6.2	5.9	6.9	4.5	8.6	12.2	11.1	20.1
XZ009	申扎县	2019-11-21 08:00:00	0	0.1	0	0	0.6	1.1	5	3.4	3.8	5.5	5.4	5.9	6.4	5.7	9	7.9	7.5	8.3	8	10.2	8.6	8.9	12.2	9.6	6.2	5.9	6.9	4.5	8.6	12.3	11.1	20.1
XZ009	申扎县	2019-11-21 09:00:00	0	0.1	0	0	0.6	0.9	4.9	3.5	3.9	5.5	5.4	5.9	6.4	5.7	9	8	7.5	8.3	8	10.2	8.6	8.9	12.2	9.6	6.2	5.9	6.9	4.5	8.6	12.2	11.1	20.1
XZ009	申扎县	2019-11-21 10:00:00	0	0.1	0	0	0.5	0.6	4.7	3.5	3.9	5.5	5.4	5.9	6.4	5.7	9	7.9	7.5	8.3	8.1	10.2	8.6	8.9	12.2	9.6	6.2	6	6.9	4.5	8.6	12.3	11.1	20.1
XZ009	申扎县	2019-11-21 11:00:00	0	0.1	0	0	0.5	0.4	4.4	3.6	3.9	5.5	5.4	5.9	6.4	5.7	9	7.9	7.5	8.3	8.1	10.2	8.6	8.9	12.2	9.6	6.3	5.9	6.9	4.5	8.6	12.2	11.1	20.1
XZ009	申扎县	2019-11-21 12:00:00	0	0.2	0	0	0.5	0.4	4.1	3.6	3.9	5.5	5.3	5.9	6.4	5.7	9	7.9	7.5	8.3	8	10.2	8.6	8.9	12.2	9.6	6.2	5.9	6.9	4.5	8.6	12.3	11.1	20.1
XZ009	申扎县	2019-11-21 13:00:00	0	0.3	0.1	0	0.5	0.4	3.8	3.5	3.8	5.5	5.4	5.9	6.4	5.7	9	7.9	7.6	8.3	8.1	10.2	8.6	8.9	12.2	9.6	6.2	5.9	6.9	4.5	8.6	12.2	11.1	20.1
XZ009	申扎县	2019-11-21 14:00:00	0.4	0.6	0.2	0.1	0.6	0.4	3.7	3.5	3.8	5.5	5.4	5.9	6.4	5.7	9	8	7.5	8.3	8	10.2	8.6	8.9	12.2	9.6	6.2	5.9	6.9	4.5	8.6	12.2	11.1	20.1
XZ009	申扎县	2019-11-21 15:00:00	0.5	1.2	0.2	0.1	0.6	0.5	3.6	3.5	3.7	5.5	5.4	5.9	6.4	5.7	9	8	7.6	8.3	8.1	10.2	8.6	8.9	12.2	9.6	6.2	5.9	6.9	4.5	8.6	12.2	11.1	20.1
XZ009	申扎县	2019-11-21 16:00:00	0.4	2.2	0.4	0.2	0.7	0.5	3.6	3.4	3.7	5.5	5.4	5.9	6.4	5.7	9	8	7.6	8.3	8	10.2	8.6	8.9	12.2	9.6	6.2	5.9	6.9	4.5	8.6	12.2	11	20.1
XZ009	申扎县	2019-11-21 17:00:00	0.4	2.2	1	0.2	0.7	0.5	3.7	3.4	3.7	5.5	5.3	5.8	6.4	5.7	9	8	7.5	8.4	8.1	10.2	8.6	8.9	12.2	9.6	6.2	5.9	6.9	4.5	8.6	12.2	11.1	20
XZ009	申扎县	2019-11-21 18:00:00	0.4	2	1.5	0.3	0.8	0.6	3.7	3.4	3.7	5.5	5.3	5.8	6.4	5.6	9	8	7.6	8.4	8	10.2	8.6	8.9	12.2	9.6	6.2	5.9	6.9	4.5	8.6	12.2	11.1	20
XZ009	申扎县	2019-11-21 19:00:00	0.4	1.9	1.5	0.4	0.9	0.6	3.8	3.3	3.7	5.5	5.3	5.8	6.3	5.7	9	8	7.5	8.3	8	10.2	8.6	8.9	12.2	9.6	6.2	5.9	6.9	4.5	8.6	12.2	11	20
XZ009	申扎县	2019-11-21 20:00:00	0.1	1.7	1.2	0.4	0.9	0.7	3.9	3.3	3.7	5.5	5.3	5.8	6.3	5.6	9	8	7.5	8.3	8	10.1	8.6	8.9	12.2	9.6	6.2	5.9	6.9	4.5	8.6	12.2	11	20
XZ009	申扎县	2019-11-21 21:00:00	0	1.1	1	0.4	0.9	0.7	4.1	3.3	3.7	5.5	5.3	5.8	6.3	5.6	9	8	7.5	8.3	8	10.1	8.6	8.9	12.2	9.6	6.2	5.9	6.9	4.5	8.6	12.2	11	20
XZ009	申扎县	2019-11-21 22:00:00	0	0.6	0.8	0.4	0.9	0.8	4.2	3.4	3.7	5.5	5.3	5.8	6.3	5.6	8.9	7.9	7.5	8.3	7.9	10.1	8.6	8.9	12.1	9.6	6.2	5.9	6.9	4.5	8.6	12.2	11	20
XZ009	申扎县	2019-11-21 23:00:00	0	0.4	0.5	0.4	0.9	0.8	4.3	3.3	3.7	5.5	5.3	5.8	6.3	5.6	8.9	7.9	7.5	8.3	7.9	10.1	8.6	8.9	12.2	9.6	6.2	5.9	6.9	4.4	8.6	12.2	11	20
XZ009	申扎县	2019-11-22 00:00:00	0	0.4	0.3	0.4	0.9	0.9	4.4	3.3	3.7	5.5	5.3	5.8	6.3	5.6	8.9	7.9	7.5	8.3	7.9	10.1	8.6	8.9	12.1	9.6	6.2	5.9	6.9	4.5	8.6	12.2	11	20
XZ009	申扎县	2019-11-22 01:00:00	0	0.3	0.2	0.3	0.9	0.9	4.5	3.3	3.7	5.5	5.3	5.8	6.4	5.6	8.9	7.9	7.5	8.3	7.9	10.1	8.6	8.8	12.1	9.5	6.2	5.9	6.9	4.5	8.6	12.2	11	20
XZ009	申扎县	2019-11-22 02:00:00	0	0.2	0.1	0.2	0.8	1	4.5	3.3	3.7	5.5	5.3	5.8	6.3	5.6	8.9	7.9	7.5	8.3	7.9	10.1	8.6	8.9	12.1	9.5	6.2	5.9	6.9	4.5	8.6	12.2	11	20
XZ009	申扎县	2019-11-22 03:00:00	0	0.2	0.1	0.1	0.8	1	4.5	3.3	3.7	5.5	5.3	5.8	6.3	5.6	8.9	7.9	7.5	8.3	7.9	10.1	8.6	8.9	12.1	9.6	6.2	5.9	6.9	4.5	8.6	12.2	11.1	20
XZ009	申扎县	2019-11-22 04:00:00	0	0.2	0.1	0.1	0.7	1	4.6	3.3	3.7	5.5	5.3	5.8	6.3	5.6	8.9	7.9	7.5	8.3	8	10.1	8.6	8.8	12.1	9.6	6.2	5.9	6.9	4.5	8.6	12.2	11	20
XZ009	申扎县	2019-11-22 05:00:00	0	0.1	0	0.1	0.6	0.9	4.5	3.4	3.7	5.5	5.3	5.8	6.3	5.6	8.9	7.9	7.5	8.2	7.9	10.1	8.5	8.8	12.1	9.6	6.2	5.9	6.9	4.5	8.6	12.2	11	20
XZ009	申扎县	2019-11-22 06:00:00	0	0.1	0	0	0.6	0.7	4.5	3.4	3.8	5.4	5.3	5.8	6.4	5.6	8.9	7.9	7.5	8.2	7.9	10.1	8.6	8.8	12.1	9.5	6.2	5.9	6.9	4.5	8.6	12.2	11	20
XZ009	申扎县	2019-11-22 07:00:00	0	0.1	0	0	0.5	0.6	4.3	3.4	3.8	5.4	5.3	5.8	6.3	5.6	8.9	7.9	7.5	8.2	7.9	10.1	8.6	8.8	12.1	9.5	6.2	5.9	6.9	4.5	8.6	12.2	11	20
XZ009	申扎县	2019-11-22 08:00:00	0	0	0	0	0.5	0.5	4.1	3.4	3.8	5.5	5.3	5.8	6.3	5.6	8.9	7.9	7.5	8.2	7.9	10.1	8.5	8.8	12.1	9.5	6.2	5.9	6.9	4.5	8.6	12.2	11	20
XZ009	申扎县	2019-11-22 09:00:00	0	0	0	0	0.4	0.4	3.8	3.4	3.8	5.4	5.3	5.8	6.3	5.6	8.9	7.9	7.5	8.2	7.9	10.1	8.5	8.8	12.1	9.5	6.2	5.8	6.9	4.5	8.6	12.2	11	20
XZ009	申扎县	2019-11-22 10:00:00	0	0	0	0	0.4	0.3	3.2	3.3	3.7	5.4	5.3	5.8	6.3	5.6	8.9	7.9	7.5	8.2	8	10.1	8.5	8.8	12.1	9.5	6.2	5.9	6.9	4.4	8.6	12.1	11	20
XZ009	申扎县	2019-11-22 11:00:00	0	0.1	0	0	0.4	0.3	2.7	3.1	3.6	5.5	5.3	5.8	6.3	5.6	8.9	7.8	7.5	8.2	8	10.1	8.5	8.8	12.1	9.5	6.2	5.8	6.8	4.4	8.6	12.1	11	20
XZ009	申扎县	2019-11-22 12:00:00	0	0.2	0	0	0.4	0.3	2.3	3	3.5	5.4	5.3	5.8	6.3	5.6	8.9	7.8	7.5	8.2	8	10.1	8.5	8.8	12.1	9.5	6.2	5.8	6.9	4.4	8.6	12.1	10.9	20
XZ009	申扎县	2019-11-22 13:00:00	0	0.3	0.1	0	0.4	0.3	2.1	2.9	3.5	5.4	5.3	5.8	6.3	5.6	8.9	7.8	7.5	8.3	8	10.1	8.5	8.8	12.1	9.5	6.2	5.8	6.9	4.4	8.6	12.2	11	20
XZ009	申扎县	2019-11-22 14:00:00	0.4	0.6	0.1	0	0.5	0.4	2.1	2.8	3.5	5.4	5.3	5.8	6.3	5.6	8.9	7.9	7.5	8.2	8	10.1	8.5	8.8	12.1	9.5	6.2	5.8	6.9	4.4	8.6	12.1	11	20
XZ009	申扎县	2019-11-22 15:00:00	0.5	1.5	0.2	0.1	0.5	0.4	2	2.8	3.4	5.4	5.3	5.8	6.3	5.6	8.9	7.9	7.5	8.3	8	10.1	8.5	8.8	12.1	9.5	6.2	5.8	6.9	4.4	8.6	12.1	11	20
XZ009	申扎县	2019-11-22 16:00:00	0.4	2.3	0.4	0.1	0.6	0.4	2	2.8	3.4	5.4	5.3	5.8	6.3	5.6	8.9	7.9	7.5	8.3	8	10.1	8.5	8.8	12.1	9.5	6.2	5.9	6.8	4.4	8.5	12.1	10.9	20
XZ009	申扎县	2019-11-22 17:00:00	0.5	2.2	1.3	0.2	0.7	0.5	2	2.7	3.4	5.4	5.3	5.8	6.3	5.6	8.9	7.9	7.5	8.3	8	10.1	8.5	8.8	12.1	9.5	6.2	5.8	6.9	4.4	8.5	12.1	11	20
XZ009	申扎县	2019-11-22 18:00:00	0.5	2	1.6	0.4	0.7	0.5	2.1	2.7	3.4	5.4	5.3	5.8	6.3	5.6	8.9	7.9	7.5	8.3	8	10.1	8.5	8.8	12.1	9.5	6.2	5.8	6.9	4.4	8.6	12.1	11	20
XZ009	申扎县	2019-11-22 19:00:00	0.4	1.9	1.4	0.7	0.8	0.5	2.1	2.7	3.4	5.4	5.2	5.8	6.3	5.6	8.9	7.9	7.5	8.3	7.9	10.1	8.5	8.8	12.1	9.5	6.2	5.9	6.9	4.4	8.6	12.1	11	20
XZ009	申扎县	2019-11-22 20:00:00	0.3	1.8	1.3	0.9	0.9	0.6	2.1	2.8	3.4	5.4	5.3	5.8	6.3	5.6	8.9	7.9	7.5	8.2	7.9	10.1	8.5	8.8	12	9.5	6.2	5.8	6.8	4.4	8.5	12.1	11	20
XZ009	申扎县	2019-11-22 21:00:00	0	1.6	1.1	0.9	0.9	0.6	2.2	2.8	3.4	5.4	5.3	5.7	6.3	5.6	8.9	7.9	7.5	8.2	7.9	10	8.5	8.8	12	9.5	6.2	5.8	6.8	4.4	8.5	12.1	11	20
XZ009	申扎县	2019-11-22 22:00:00	0	1	1	0.8	0.9	0.6	2.4	2.8	3.4	5.4	5.3	5.8	6.3	5.6	8.9	7.9	7.4	8.2	7.9	10.1	8.5	8.8	12	9.5	6.2	5.8	6.8	4.4	8.5	12.1	11	20
XZ009	申扎县	2019-11-22 23:00:00	0	0.6	0.9	0.7	0.9	0.7	2.5	2.9	3.4	5.3	5.3	5.8	6.3	5.6	8.9	7.9	7.5	8.2	7.9	10	8.5	8.8	12	9.5	6.2	5.8	6.8	4.4	8.5	12.1	10.9	20
XZ009	申扎县	2019-11-23 00:00:00	0	0.5	0.7	0.7	0.9	0.7	2.7	2.9	3.4	5.3	5.3	5.7	6.2	5.6	8.9	7.9	7.5	8.2	7.9	10	8.5	8.7	12	9.5	6.1	5.8	6.8	4.4	8.5	12.1	11	20
XZ009	申扎县	2019-11-23 01:00:00	0	0.4	0.4	0.6	0.9	0.7	3	3	3.5	5.4	5.3	5.7	6.3	5.6	8.9	7.9	7.4	8.2	7.9	10	8.5	8.7	12	9.5	6.1	5.8	6.8	4.4	8.5	12.1	10.9	19.9
XZ009	申扎县	2019-11-23 02:00:00	0	0.3	0.3	0.5	0.9	0.7	3.3	3	3.5	5.3	5.2	5.7	6.3	5.6	8.9	7.8	7.5	8.2	7.9	10	8.5	8.7	12	9.5	6.1	5.8	6.8	4.4	8.5	12.1	10.9	19.9
XZ009	申扎县	2019-11-23 03:00:00	0	0.3	0.2	0.4	0.9	0.7	3.5	3	3.5	5.4	5.2	5.7	6.3	5.6	8.9	7.8	7.5	8.2	7.9	10	8.5	8.7	12	9.5	6.1	5.8	6.8	4.4	8.5	12.1	10.9	19.9
XZ009	申扎县	2019-11-23 04:00:00	0	0.2	0.1	0.2	0.8	0.7	3.8	3.1	3.6	5.3	5.2	5.7	6.2	5.6	8.9	7.8	7.5	8.2	7.9	10	8.5	8.7	12	9.4	6.1	5.8	6.9	4.4	8.5	12.1	10.9	20
XZ009	申扎县	2019-11-23 05:00:00	0	0.2	0.1	0.2	0.7	0.7	4	3.1	3.6	5.4	5.2	5.7	6.2	5.6	8.8	7.8	7.4	8.2	7.9	10	8.5	8.7	12	9.4	6.2	5.8	6.8	4.4	8.5	12.1	10.9	19.9
XZ009	申扎县	2019-11-23 06:00:00	0	0.1	0	0.1	0.6	0.7	4	3.1	3.6	5.3	5.2	5.7	6.2	5.6	8.8	7.8	7.5	8.2	7.9	10	8.5	8.7	12.1	9.5	6.1	5.8	6.8	4.4	8.5	12.1	10.9	19.9
XZ009	申扎县	2019-11-23 07:00:00	0	0.1	0	0.1	0.6	0.6	4	3.2	3.6	5.3	5.2	5.7	6.2	5.6	8.8	7.8	7.5	8.2	7.8	10	8.5	8.7	12	9.4	6.1	5.8	6.8	4.4	8.5	12	10.9	19.9
XZ009	申扎县	2019-11-23 08:00:00	0	0.1	0	0	0.5	0.5	3.8	3.2	3.6	5.4	5.2	5.7	6.2	5.5	8.8	7.8	7.5	8.2	7.8	10	8.5	8.7	12	9.4	6.1	5.8	6.8	4.4	8.5	12.1	10.9	19.9
XZ009	申扎县	2019-11-23 09:00:00	0	0.1	0	0	0.5	0.4	3.5	3.1	3.6	5.4	5.2	5.7	6.2	5.5	8.8	7.8	7.4	8.2	7.8	10	8.5	8.7	12	9.4	6.1	5.8	6.8	4.4	8.5	12.1	10.9	19.9
XZ009	申扎县	2019-11-23 10:00:00	0	0.1	0	0	0.5	0.4	3.2	3.1	3.6	5.3	5.2	5.7	6.2	5.5	8.8	7.8	7.4	8.2	8	10	8.5	8.7	12	9.4	6.1	5.8	6.8	4.4	8.5	12.1	10.9	19.9
XZ009	申扎县	2019-11-23 11:00:00	0	0.2	0	0	0.5	0.4	2.8	3	3.5	5.4	5.2	5.7	6.2	5.5	8.8	7.8	7.4	8.2	7.9	10	8.5	8.7	12	9.4	6.1	5.8	6.8	4.4	8.5	12.1	10.9	19.9
XZ009	申扎县	2019-11-23 12:00:00	0	0.3	0.1	0	0.5	0.4	2.4	2.9	3.4	5.4	5.2	5.7	6.2	5.5	8.9	7.8	7.4	8.2	7.9	10	8.5	8.7	12	9.4	6.1	5.8	6.8	4.4	8.5	12.1	10.9	19.9
XZ009	申扎县	2019-11-23 13:00:00	0.3	0.5	0.2	0.1	0.5	0.4	2.3	2.8	3.4	5.3	5.2	5.7	6.2	5.5	8.8	7.8	7.4	8.2	7.9	10	8.4	8.7	12	9.4	6.1	5.8	6.8	4.4	8.5	12.1	10.9	19.9
XZ009	申扎县	2019-11-23 14:00:00	0.4	1.3	0.2	0.1	0.6	0.5	2.2	2.8	3.4	5.3	5.2	5.7	6.2	5.5	8.9	7.8	7.4	8.2	7.9	10	8.5	8.7	12	9.4	6.1	5.8	6.8	4.4	8.5	12.1	10.9	19.9
XZ009	申扎县	2019-11-23 15:00:00	0.4	2.3	0.4	0.2	0.6	0.5	2.2	2.8	3.3	5.3	5.2	5.7	6.2	5.6	8.9	7.8	7.4	8.2	7.9	10	8.5	8.7	12	9.4	6.1	5.8	6.8	4.4	8.5	12.1	10.9	19.9
XZ009	申扎县	2019-11-23 16:00:00	0.5	2.1	1.6	0.3	0.7	0.5	2.2	2.8	3.3	5.3	5.2	5.7	6.2	5.6	8.8	7.8	7.4	8.2	7.9	10	8.5	8.7	12	9.4	6.1	5.8	6.8	4.4	8.5	12.1	10.9	19.9
XZ009	申扎县	2019-11-23 17:00:00	0.5	2	1.5	0.7	0.8	0.6	2.2	2.8	3.3	5.3	5.2	5.7	6.2	5.5	8.9	7.8	7.4	8.2	7.9	10	8.5	8.7	12	9.4	6.1	5.8	6.8	4.4	8.5	12.1	10.9	19.9
XZ009	申扎县	2019-11-23 18:00:00	0.5	2	1.3	1.2	0.9	0.6	2.2	2.8	3.3	5.3	5.2	5.7	6.2	5.6	8.9	7.8	7.4	8.2	7.9	10	8.5	8.7	12	9.4	6.1	5.8	6.8	4.4	8.5	12.1	10.9	19.9
XZ009	申扎县	2019-11-23 19:00:00	0.4	1.9	1.2	1.4	1.2	0.7	2.3	2.8	3.3	5.3	5.2	5.7	6.2	5.5	8.9	7.8	7.4	8.2	7.9	10	8.5	8.7	12	9.4	6.1	5.8	6.8	4.4	8.5	12.1	10.9	19.9
XZ009	申扎县	2019-11-23 20:00:00	0.4	1.9	1.2	1.4	1.4	0.7	2.4	2.8	3.4	5.3	5.2	5.7	6.2	5.5	8.9	7.8	7.4	8.2	7.9	10	8.5	8.7	12	9.4	6.1	5.8	6.8	4.4	8.5	12.1	10.9	19.9
XZ009	申扎县	2019-11-23 21:00:00	0.3	1.8	1.2	1.4	1.6	0.8	2.6	2.8	3.4	5.3	5.2	5.7	6.2	5.6	8.9	7.8	7.4	8.2	7.9	10	8.5	8.7	11.9	9.4	6.1	5.8	6.8	4.4	8.5	12.1	10.9	19.8
XZ009	申扎县	2019-11-23 22:00:00	0.3	1.8	1.2	1.4	1.7	0.8	2.8	2.8	3.4	5.3	5.2	5.7	6.2	5.5	8.9	7.8	7.4	8.2	7.8	10	8.5	8.7	11.9	9.4	6.1	5.8	6.8	4.4	8.5	12	10.9	19.9
XZ009	申扎县	2019-11-23 23:00:00	0.2	1.8	1.2	1.3	1.7	0.9	3.1	2.9	3.4	5.3	5.2	5.7	6.2	5.5	8.9	7.8	7.4	8.2	7.9	10	8.5	8.7	11.9	9.4	6.1	5.8	6.8	4.4	8.5	12	10.9	19.9
XZ009	申扎县	2019-11-24 00:00:00	0.2	1.7	1.2	1.3	1.6	0.9	3.4	2.9	3.4	5.3	5.2	5.7	6.2	5.5	8.9	7.8	7.4	8.2	7.9	10	8.5	8.7	11.9	9.4	6.1	5.8	6.8	4.4	8.5	12	10.9	19.9
XZ009	申扎县	2019-11-24 01:00:00	0.2	1.6	1.1	1.3	1.5	0.9	3.8	2.9	3.5	5.3	5.2	5.7	6.2	5.6	8.9	7.8	7.4	8.2	7.8	10	8.4	8.6	11.9	9.4	6.1	5.8	6.8	4.4	8.5	12	10.9	19.9
XZ009	申扎县	2019-11-24 02:00:00	0.1	1.5	1.1	1.3	1.5	1	4.1	2.9	3.5	5.3	5.2	5.7	6.2	5.5	8.9	7.8	7.4	8.2	7.9	10	8.5	8.7	11.9	9.4	6.1	5.8	6.8	4.4	8.5	12	10.9	19.9
XZ009	申扎县	2019-11-24 03:00:00	0.1	1.4	1.1	1.3	1.5	1	4.4	2.9	3.5	5.3	5.2	5.7	6.2	5.5	8.9	7.8	7.4	8.2	7.8	9.9	8.4	8.7	11.9	9.4	6.1	5.7	6.8	4.4	8.5	12	10.9	19.9
XZ009	申扎县	2019-11-24 04:00:00	0	1.2	1	1.2	1.5	1.1	4.6	2.9	3.5	5.3	5.2	5.7	6.2	5.6	8.8	7.8	7.4	8.2	7.8	10	8.4	8.7	11.9	9.4	6.1	5.7	6.8	4.4	8.5	12.1	10.8	19.9
XZ009	申扎县	2019-11-24 05:00:00	0	0.8	0.9	1.2	1.5	1.1	4.7	2.9	3.5	5.3	5.2	5.7	6.2	5.5	8.8	7.8	7.4	8.2	7.8	9.9	8.4	8.7	11.9	9.4	6.1	5.8	6.8	4.4	8.5	12	10.9	19.9
XZ009	申扎县	2019-11-24 06:00:00	0	0.6	0.8	1.2	1.4	1.2	4.8	2.9	3.5	5.3	5.2	5.7	6.2	5.5	8.8	7.8	7.4	8.2	7.8	9.9	8.4	8.7	11.9	9.4	6.1	5.8	6.8	4.4	8.5	12	10.8	19.9
XZ009	申扎县	2019-11-24 07:00:00	0	0.6	0.6	1.2	1.4	1.3	4.8	2.9	3.6	5.3	5.2	5.7	6.2	5.5	8.8	7.8	7.4	8.2	7.8	9.9	8.4	8.7	11.9	9.4	6.1	5.8	6.8	4.4	8.5	12	10.8	19.8
XZ009	申扎县	2019-11-24 08:00:00	0	0.5	0.4	1.1	1.4	1.4	4.9	2.9	3.6	5.3	5.2	5.7	6.2	5.6	8.8	7.8	7.4	8.2	7.8	9.9	8.4	8.7	11.9	9.4	6.1	5.7	6.8	4.4	8.5	12	10.9	19.8
XZ009	申扎县	2019-11-24 09:00:00	0	0.4	0.3	1	1.4	1.5	4.9	2.9	3.6	5.3	5.2	5.7	6.2	5.5	8.8	7.8	7.4	8.1	7.9	9.9	8.4	8.7	11.9	9.4	6.1	5.7	6.8	4.4	8.5	12	10.8	19.9
XZ009	申扎县	2019-11-24 10:00:00	0	0.4	0.2	0.7	1.3	1.6	4.8	2.9	3.6	5.3	5.2	5.7	6.2	5.5	8.8	7.8	7.3	8.2	7.9	9.9	8.4	8.7	11.9	9.3	6.1	5.7	6.7	4.3	8.5	12	10.8	19.8
XZ009	申扎县	2019-11-24 11:00:00	0	0.4	0.2	0.5	1.3	1.7	4.7	2.9	3.6	5.3	5.2	5.7	6.2	5.5	8.8	7.8	7.4	8.2	7.8	9.9	8.4	8.7	11.9	9.4	6.1	5.7	6.8	4.3	8.5	12	10.8	19.8
XZ009	申扎县	2019-11-24 12:00:00	0	0.5	0.3	0.5	1.3	1.8	4.5	2.9	3.6	5.3	5.2	5.7	6.2	5.5	8.8	7.8	7.4	8.2	7.9	10	8.4	8.7	11.9	9.4	6.1	5.7	6.7	4.4	8.5	12	10.8	19.8
XZ009	申扎县	2019-11-24 13:00:00	0.3	0.9	0.4	0.5	1.3	1.9	4.3	2.9	3.6	5.3	5.2	5.7	6.2	5.5	8.8	7.8	7.4	8.2	7.9	9.9	8.4	8.7	11.9	9.4	6.1	5.7	6.7	4.3	8.5	12	10.8	19.8
XZ009	申扎县	2019-11-24 14:00:00	0.3	1.9	0.5	0.5	1.4	2	4.2	2.9	3.6	5.3	5.2	5.7	6.2	5.5	8.8	7.8	7.4	8.2	7.9	10	8.5	8.7	11.9	9.4	6.1	5.8	6.7	4.3	8.4	12	10.8	19.8
XZ009	申扎县	2019-11-24 15:00:00	0.4	1.8	1.3	0.7	1.4	2.1	3.9	2.9	3.6	5.3	5.2	5.7	6.2	5.5	8.8	7.8	7.4	8.2	7.9	10	8.4	8.7	11.9	9.4	6.1	5.7	6.8	4.3	8.5	12	10.8	19.8
XZ009	申扎县	2019-11-24 16:00:00	0.4	1.9	1.3	1.3	1.6	2.2	3.7	2.9	3.6	5.3	5.2	5.7	6.2	5.5	8.8	7.8	7.4	8.2	7.9	9.9	8.4	8.6	11.9	9.3	6.1	5.7	6.8	4.4	8.5	12	10.8	19.8
XZ009	申扎县	2019-11-24 17:00:00	0.4	1.9	1.3	1.5	2.4	2.4	3.4	2.9	3.6	5.3	5.2	5.7	6.2	5.6	8.9	7.8	7.4	8.2	7.9	10	8.4	8.7	11.9	9.4	6.1	5.7	6.8	4.3	8.5	12	10.8	19.8
XZ009	申扎县	2019-11-24 18:00:00	0.4	1.9	1.3	1.6	2.8	2.8	3.3	3	3.7	5.3	5.2	5.7	6.2	5.5	8.8	7.8	7.4	8.2	7.9	10	8.5	8.8	11.9	9.4	6	5.8	6.7	4.3	8.4	12	10.8	19.8
XZ009	申扎县	2019-11-24 19:00:00	0.3	1.8	1.3	1.6	2.8	3	3.5	3.1	3.7	5.3	5.2	5.7	6.2	5.5	8.8	7.8	7.4	8.2	7.8	9.9	8.4	8.7	11.9	9.4	6.1	5.7	6.7	4.3	8.5	12	10.8	19.8
XZ009	申扎县	2019-11-24 20:00:00	0.2	1.7	1.3	1.6	2.7	3	3.6	3.1	3.8	5.3	5.2	5.7	6.2	5.5	8.8	7.8	7.4	8.2	7.8	10	8.4	8.7	11.9	9.3	6	5.7	6.7	4.4	8.5	12	10.8	19.8
XZ009	申扎县	2019-11-24 21:00:00	0.2	1.7	1.2	1.5	2.7	2.9	3.7	3.2	3.7	5.3	5.2	5.7	6.2	5.5	8.8	7.8	7.4	8.2	7.8	9.9	8.4	8.7	11.9	9.4	6	5.7	6.7	4.3	8.4	12	10.8	19.8
XZ009	申扎县	2019-11-24 22:00:00	0.1	1.6	1.2	1.4	2.6	2.9	3.8	3.2	3.8	5.3	5.2	5.7	6.3	5.6	8.8	7.8	7.4	8.2	7.8	9.9	8.4	8.7	11.9	9.4	6	5.7	6.7	4.3	8.4	12	10.8	19.8
XZ009	申扎县	2019-11-24 23:00:00	0	1.4	1	1.4	2.6	2.8	3.8	3.2	3.8	5.4	5.2	5.7	6.3	5.6	8.8	7.8	7.4	8.2	7.9	9.9	8.4	8.7	11.9	9.3	6	5.7	6.8	4.3	8.4	12	10.8	19.8
XZ009	申扎县	2019-11-25 00:00:00	0	1	1	1.4	2.5	2.8	3.8	3.2	3.8	5.3	5.2	5.7	6.3	5.6	8.8	7.8	7.4	8.2	7.8	9.9	8.4	8.6	11.9	9.4	6	5.7	6.7	4.3	8.4	12	10.8	19.8
XZ009	申扎县	2019-11-25 01:00:00	0	0.6	1	1.4	2.5	2.7	3.9	3.2	3.8	5.3	5.2	5.7	6.3	5.6	8.8	7.8	7.4	8.1	7.8	9.9	8.4	8.7	11.9	9.3	6	5.7	6.7	4.3	8.4	12	10.8	19.8
XZ009	申扎县	2019-11-25 02:00:00	0	0.4	0.9	1.4	2.4	2.7	4	3.2	3.8	5.3	5.2	5.7	6.3	5.6	8.8	7.8	7.4	8.1	7.8	10	8.4	8.7	11.9	9.3	6	5.7	6.7	4.3	8.4	12	10.8	19.8
XZ009	申扎县	2019-11-25 03:00:00	0	0.4	0.7	1.4	2.4	2.7	4	3.2	3.8	5.3	5.2	5.7	6.3	5.6	8.8	7.8	7.4	8.1	7.8	9.9	8.4	8.7	11.9	9.3	6	5.7	6.7	4.3	8.4	12	10.8	19.8
XZ009	申扎县	2019-11-25 04:00:00	0	0.4	0.4	1.3	2.4	2.6	4.1	3.2	3.8	5.3	5.2	5.7	6.2	5.6	8.8	7.8	7.4	8.1	7.8	10	8.4	8.7	11.9	9.4	6	5.7	6.7	4.3	8.4	12	10.8	19.8
XZ009	申扎县	2019-11-25 05:00:00	0	0.3	0.3	1.2	2.3	2.6	4.1	3.2	3.8	5.3	5.2	5.7	6.2	5.6	8.8	7.8	7.4	8.1	7.8	10	8.4	8.7	11.8	9.3	6	5.7	6.7	4.3	8.4	12	10.8	19.8
XZ009	申扎县	2019-11-25 06:00:00	0	0.3	0.3	1.1	2.3	2.6	4.2	3.2	3.8	5.3	5.2	5.7	6.2	5.6	8.8	7.8	7.4	8.1	7.8	9.9	8.4	8.7	11.8	9.4	6	5.7	6.7	4.3	8.4	12	10.8	19.8
XZ009	申扎县	2019-11-25 07:00:00	0	0.3	0.2	0.9	2.3	2.6	4.2	3.2	3.8	5.3	5.2	5.7	6.2	5.6	8.8	7.8	7.4	8.1	7.8	9.9	8.4	8.7	11.8	9.3	6	5.7	6.7	4.3	8.4	12	10.8	19.8
XZ009	申扎县	2019-11-25 08:00:00	0	0.3	0.2	0.7	2.2	2.5	4.3	3.2	3.8	5.3	5.2	5.7	6.2	5.5	8.8	7.8	7.4	8.1	7.8	10	8.4	8.7	11.9	9.3	6	5.7	6.7	4.3	8.4	12	10.8	19.8
XZ009	申扎县	2019-11-25 09:00:00	0	0.2	0.2	0.4	2.2	2.5	4.4	3.2	3.8	5.3	5.2	5.7	6.2	5.5	8.8	7.7	7.4	8.1	7.8	10	8.4	8.6	11.9	9.3	6	5.7	6.7	4.3	8.4	12	10.8	19.8
XZ009	申扎县	2019-11-25 10:00:00	0	0.2	0.1	0.3	2.1	2.5	4.5	3.2	3.8	5.3	5.2	5.7	6.2	5.5	8.8	7.7	7.3	8.2	7.9	10	8.4	8.7	11.8	9.3	6	5.7	6.7	4.3	8.4	12	10.8	19.8
XZ009	申扎县	2019-11-25 11:00:00	0	0.3	0.1	0.3	2	2.5	4.5	3.2	3.8	5.3	5.2	5.7	6.2	5.5	8.8	7.7	7.3	8.1	7.8	10	8.4	8.7	11.8	9.3	6	5.7	6.7	4.3	8.4	12	10.8	19.8
XZ009	申扎县	2019-11-25 12:00:00	0	0.4	0.2	0.3	1.9	2.5	4.5	3.2	3.8	5.3	5.2	5.7	6.2	5.5	8.8	7.7	7.3	8.2	7.8	9.9	8.4	8.7	11.8	9.3	6	5.7	6.7	4.3	8.4	12	10.8	19.8
XZ009	申扎县	2019-11-25 13:00:00	0.2	0.7	0.3	0.3	1.9	2.5	4.5	3.2	3.8	5.3	5.2	5.7	6.2	5.5	8.8	7.8	7.4	8.2	7.8	10	8.4	8.7	11.9	9.3	6	5.7	6.7	0	8.4	12	10.8	19.8
XZ009	申扎县	2019-11-25 14:00:00	0.3	1.6	0.4	0.4	1.9	2.4	4.4	3.2	3.8	5.3	5.2	5.7	6.2	5.5	8.8	7.7	7.3	8.2	7.8	10	8.4	8.6	11.9	9.3	6	5.7	6.7	4.3	8.4	12	10.8	19.8
XZ009	申扎县	2019-11-25 15:00:00	0.3	1.9	0.9	0.5	2	2.4	4.3	3.2	3.7	5.3	5.2	5.6	6.2	5.5	8.8	7.7	7.3	8.2	7.8	9.9	8.4	8.7	11.9	9.3	6	5.7	6.7	4.3	8.4	12	10.8	19.8
XZ009	申扎县	2019-11-25 16:00:00	0.3	1.7	1.3	0.7	2.1	2.4	4.2	3.2	3.7	5.3	5.2	5.7	6.2	5.5	8.8	7.7	7.3	8.2	7.8	10	8.4	8.6	11.8	9.3	6	5.7	6.7	4.3	8.4	12	10.8	19.8
XZ009	申扎县	2019-11-25 17:00:00	0.3	1.8	1.3	1.3	2.2	2.3	4.1	3.2	3.7	5.3	5.1	5.7	6.2	5.5	8.8	7.8	7.3	8.2	7.8	10	8.4	8.7	11.8	9.3	6	5.7	6.7	4.3	8.4	12	10.8	19.8
XZ009	申扎县	2019-11-25 18:00:00	0.3	1.7	1.2	1.5	2.3	2.4	4	3.2	3.7	5.3	5.2	5.6	6.2	5.5	8.8	7.8	7.3	8.2	7.8	9.9	8.4	8.7	11.8	9.3	6	5.7	6.7	4.3	8.4	12	10.8	19.7
XZ009	申扎县	2019-11-25 19:00:00	0.2	1.7	1.2	1.5	2.3	2.4	4	3.2	3.7	5.3	5.2	5.6	6.2	5.5	8.8	7.7	7.3	8.2	7.8	9.9	8.4	8.7	11.8	9.3	6	5.7	6.7	4.3	8.4	12	10.8	19.8
XZ009	申扎县	2019-11-25 20:00:00	0.1	1.6	1.2	1.5	2.3	2.4	4	3.2	3.7	5.3	5.2	5.7	6.2	5.5	8.8	7.8	7.3	8.1	7.8	9.9	8.4	8.7	11.8	9.3	6	5.7	6.7	4.3	8.4	12	10.8	19.7
XZ009	申扎县	2019-11-25 21:00:00	0	1.3	1.1	1.4	2.3	2.4	4	3.2	3.7	5.3	5.2	5.6	6.2	5.5	8.7	7.8	7.3	8.1	7.8	9.9	8.4	8.6	11.8	9.3	6	5.7	6.7	4.3	8.4	12	10.8	19.8
XZ009	申扎县	2019-11-25 22:00:00	0	1	1	1.4	2.3	2.4	4	3.2	3.8	5.3	5.2	5.7	6.2	5.5	8.7	7.7	7.3	8.1	7.8	9.9	8.4	8.6	11.8	9.3	6	5.7	6.7	4.3	8.4	12	10.8	19.8
XZ009	申扎县	2019-11-25 23:00:00	0	0.6	1	1.4	2.2	2.4	4.1	3.2	3.7	5.3	5.2	5.7	6.2	5.5	8.8	7.7	7.3	8.1	7.8	9.9	8.4	8.6	11.8	9.3	6	5.7	6.7	4.3	8.4	12	10.8	19.7
XZ009	申扎县	2019-11-26 00:00:00	0	0.5	0.9	1.4	2.2	2.4	4.1	3.2	3.8	5.3	5.2	5.7	6.2	5.5	8.8	7.7	7.3	8.1	7.8	9.9	8.4	8.6	11.8	9.3	6	5.7	6.7	4.3	8.4	12	10.8	19.7
XZ009	申扎县	2019-11-26 01:00:00	0	0.4	0.6	1.4	2.2	2.3	4.2	3.2	3.8	5.3	5.1	5.6	6.2	5.5	8.7	7.7	7.3	8.1	7.7	9.9	8.4	8.6	11.8	9.3	5.9	5.7	6.7	4.3	8.4	12	10.8	19.7
XZ009	申扎县	2019-11-26 02:00:00	0	0.3	0.4	1.3	2.1	2.3	4.2	3.2	3.8	5.3	5.2	5.6	6.2	5.5	8.7	7.7	7.3	8.1	7.7	9.9	8.4	8.6	11.8	9.3	6	5.7	6.7	4.3	8.4	12	10.8	19.7
XZ009	申扎县	2019-11-26 03:00:00	0	0.3	0.3	1.1	2.1	2.3	4.3	3.2	3.8	5.3	5.2	5.6	6.2	5.5	8.7	7.7	7.3	8.1	7.7	9.9	8.4	8.6	11.8	9.3	6	5.7	6.7	4.3	8.4	12	10.8	19.7
XZ009	申扎县	2019-11-26 04:00:00	0	0.2	0.2	0.9	2.1	2.3	4.3	3.2	3.8	5.3	5.2	5.6	6.2	5.5	8.7	7.7	7.3	8.1	7.7	9.9	8.4	8.6	11.8	9.3	6	5.7	6.7	4.3	8.4	11.9	10.8	19.7
XZ009	申扎县	2019-11-26 05:00:00	0	0.1	0.1	0.5	2	2.3	4.4	3.2	3.8	5.3	5.2	5.6	6.2	5.5	8.7	7.7	7.3	8.1	7.7	9.9	8.3	8.6	11.7	9.3	5.9	5.7	6.7	4.3	8.4	12	10.8	19.7
XZ009	申扎县	2019-11-26 06:00:00	0	0.1	0.1	0.3	1.9	2.3	4.5	3.2	3.8	5.3	5.2	5.7	6.2	5.5	8.7	7.7	7.2	8.1	7.7	9.9	8.4	8.6	11.7	9.3	6	5.7	6.7	4.3	8.4	12	10.7	19.7
XZ009	申扎县	2019-11-26 07:00:00	0	0.1	0.1	0.2	1.7	2.3	4.6	3.2	3.8	5.3	5.2	5.7	6.2	5.5	8.7	7.6	7.3	8.1	7.7	9.9	8.4	8.6	11.7	9.3	6	5.7	6.7	4.3	8.4	12	10.8	19.7
XZ009	申扎县	2019-11-26 08:00:00	0	0.1	0	0.1	1.3	2.2	4.7	3.2	3.8	5.4	5.2	5.7	6.1	5.5	8.7	7.7	7.3	8	7.7	9.9	8.4	8.6	11.7	9.3	5.9	5.7	6.6	4.3	8.4	11.9	10.7	19.7
XZ009	申扎县	2019-11-26 09:00:00	0	0.1	0	0.1	0.9	2.2	5	3.2	3.8	5.4	5.2	5.7	6.2	5.5	8.7	7.7	7.3	8	7.7	9.9	8.4	8.6	11.7	9.3	5.9	5.6	6.7	4.3	8.4	11.9	10.8	19.7
XZ009	申扎县	2019-11-26 10:00:00	0	0.1	0	0	0.7	2.1	5.2	3.2	3.8	5.3	5.1	5.7	6.1	5.5	8.7	7.6	7.3	8.1	7.8	9.9	8.3	8.6	11.7	9.2	6	5.7	6.7	4.3	8.4	11.9	10.7	19.7
XZ009	申扎县	2019-11-26 11:00:00	0	0.1	0	0	0.7	1.9	5.4	3.2	3.8	5.4	5.2	5.7	6.1	5.5	8.7	7.7	7.3	8.1	7.8	9.9	8.3	8.6	11.7	9.3	5.9	5.7	6.6	4.3	8.4	12	10.7	19.7
XZ009	申扎县	2019-11-26 12:00:00	0	0.2	0	0	0.7	1.6	5.4	3.3	3.7	5.4	5.2	5.7	6.1	5.5	8.7	7.6	7.3	8.1	7.8	9.9	8.3	8.6	11.7	9.3	6	5.6	6.6	4.3	8.4	11.9	10.7	19.7
XZ009	申扎县	2019-11-26 13:00:00	0	0.4	0.1	0.1	0.7	1.4	5.3	3.3	3.7	5.3	5.2	5.7	6.1	5.5	8.7	7.6	7.3	8.1	7.8	9.8	8.4	8.6	11.7	9.3	6	5.7	6.6	4.3	8.4	11.9	10.7	19.7
XZ009	申扎县	2019-11-26 14:00:00	0.2	0.6	0.2	0.1	0.7	1.3	5.2	3.3	3.7	5.3	5.2	5.7	6.1	5.5	8.7	7.6	7.3	8.1	7.8	9.9	8.3	8.6	11.7	9.2	6	5.7	6.7	4.3	8.4	11.9	10.7	19.7
XZ009	申扎县	2019-11-26 15:00:00	0.2	1.4	0.3	0.2	0.8	1.3	5.1	3.3	3.7	5.3	5.1	5.6	6.1	5.5	8.7	7.7	7.3	8.1	7.8	9.9	8.3	8.6	11.7	9.3	6	5.7	6.6	4.3	8.4	11.9	10.7	19.7
XZ009	申扎县	2019-11-26 16:00:00	0.2	1.7	0.4	0.2	0.8	1.3	5.1	3.3	3.7	5.3	5.2	5.6	6.1	5.5	8.7	7.7	7.3	8.1	7.8	9.8	8.3	8.6	11.7	9.3	6	5.7	6.6	4.3	8.4	11.9	10.7	19.7
XZ009	申扎县	2019-11-26 17:00:00	0.1	1.6	0.4	0.3	0.9	1.3	5	3.3	3.7	5.3	5.1	5.6	6.1	5.5	8.7	7.7	7.3	8.1	7.8	9.9	8.3	8.6	11.7	9.3	6	5.7	6.6	4.3	8.4	11.9	10.7	19.7
XZ009	申扎县	2019-11-26 18:00:00	0.1	1.6	0.5	0.3	0.9	1.4	5	3.3	3.7	5.3	5.1	5.6	6.1	5.5	8.7	7.7	7.3	8.1	7.8	9.9	8.3	8.6	11.7	9.2	6	5.7	6.6	4.3	8.4	11.9	10.7	19.7
XZ009	申扎县	2019-11-26 19:00:00	0.1	1.4	0.4	0.3	0.9	1.4	4.9	3.2	3.7	5.3	5.1	5.6	6.1	5.5	8.7	7.6	7.3	8.1	7.7	9.9	8.4	8.6	11.7	9.2	5.9	5.7	6.6	4.3	8.4	11.9	10.7	19.7
XZ009	申扎县	2019-11-26 20:00:00	0	1.1	0.4	0.3	1	1.5	4.9	3.2	3.7	5.3	5.1	5.6	6.1	5.4	8.7	7.6	7.3	8.1	7.7	9.8	8.3	8.6	11.7	9.3	6	5.7	6.6	4.3	8.4	11.9	10.7	19.7
XZ009	申扎县	2019-11-26 21:00:00	0	0.7	0.3	0.3	1	1.5	4.9	3.2	3.7	5.3	5.1	5.6	6.1	5.4	8.7	7.6	7.3	8.1	7.7	9.8	8.4	8.6	11.7	9.2	5.9	5.6	6.6	4.3	8.4	11.9	10.8	19.7
XZ009	申扎县	2019-11-26 22:00:00	0	0.5	0.3	0.3	1	1.6	4.8	3.2	3.7	5.2	5.1	5.6	6.1	5.4	8.7	7.6	7.3	8	7.7	9.8	8.3	8.6	11.7	9.2	5.9	5.6	6.6	4.3	8.4	11.9	10.7	19.7
XZ009	申扎县	2019-11-26 23:00:00	0	0.4	0.2	0.3	1	1.6	4.8	3.2	3.7	5.2	5.1	5.6	6.1	5.4	8.7	7.7	7.3	8	7.7	9.8	8.3	8.6	11.7	9.2	5.9	5.7	6.6	4.3	8.4	11.9	10.7	19.7
XZ009	申扎县	2019-11-27 00:00:00	0	0.3	0.2	0.2	0.9	1.6	4.8	3.2	3.7	5.2	5.1	5.6	6.1	5.4	8.7	7.6	7.3	8	7.7	9.8	8.3	8.6	11.7	9.2	5.9	5.6	6.6	4.3	8.4	11.9	10.7	19.7
XZ009	申扎县	2019-11-27 01:00:00	0	0.2	0.1	0.2	0.9	1.6	4.8	3.2	3.7	5.2	5.1	5.6	6.1	5.4	8.6	7.6	7.2	8	7.7	9.8	8.3	8.5	11.7	9.2	5.9	5.6	6.6	4.2	8.4	11.9	10.7	19.7
XZ009	申扎县	2019-11-27 02:00:00	0	0.2	0.1	0.1	0.8	1.6	4.9	3.2	3.7	5.2	5.1	5.6	6.1	5.4	8.6	7.6	7.2	8	7.7	9.8	8.3	8.5	11.7	9.2	5.9	5.6	6.6	4.2	8.4	11.9	10.7	19.7
XZ009	申扎县	2019-11-27 03:00:00	0	0.1	0	0.1	0.7	1.5	4.9	3.2	3.7	5.2	5.1	5.6	6.1	5.4	8.6	7.6	7.2	8	7.7	9.8	8.3	8.5	11.7	9.2	5.9	5.6	6.6	4.3	8.4	11.9	10.7	19.7
XZ009	申扎县	2019-11-27 04:00:00	0	0.1	0	0.1	0.7	1.3	4.9	3.2	3.7	5.3	5.1	5.6	6.1	5.4	8.6	7.6	7.2	8	7.7	9.8	8.3	8.5	11.7	9.2	5.9	5.6	6.6	4.3	8.4	11.9	10.7	19.7
XZ009	申扎县	2019-11-27 05:00:00	0	0.1	0	0	0.6	1.1	4.9	3.2	3.7	5.2	5.1	5.6	6.1	5.4	8.6	7.6	7.2	8	7.7	9.7	8.3	8.5	11.7	9.2	5.9	5.6	6.6	4.3	8.4	11.9	10.7	19.7
XZ009	申扎县	2019-11-27 06:00:00	0	0.1	0	0	0.5	0.7	4.7	3.3	3.7	5.3	5.1	5.6	6.1	5.4	8.6	7.6	7.2	8	7.7	9.8	8.3	8.5	11.7	9.2	5.9	5.6	6.6	4.3	8.4	11.9	10.7	19.7
XZ009	申扎县	2019-11-27 07:00:00	0	0	0	0	0.5	0.5	4.5	3.4	3.7	5.2	5.1	5.6	6.1	5.4	8.6	7.6	7.2	8	7.6	9.8	8.3	8.5	11.6	9.2	5.9	5.6	6.6	4.3	8.4	11.9	10.7	19.7
XZ009	申扎县	2019-11-27 08:00:00	0	0	0	0	0.4	0.3	4.2	3.4	3.7	5.3	5.1	5.6	6	5.4	8.6	7.5	7.2	8	7.6	9.8	8.3	8.5	11.6	9.2	5.9	5.6	6.6	4.3	8.3	11.9	10.7	19.7
XZ009	申扎县	2019-11-27 09:00:00	0	0	0	0	0.4	0.3	3.7	3.3	3.7	5.3	5.1	5.6	6	5.4	8.6	7.5	7.2	7.9	7.7	9.8	8.3	8.5	11.6	9.2	5.9	5.6	6.6	4.3	8.4	11.9	10.7	19.7
XZ009	申扎县	2019-11-27 10:00:00	0	0	0	0	0.4	0.2	3.1	3.2	3.6	5.2	5.1	5.6	6	5.4	8.5	7.6	7.2	8	7.8	9.7	8.3	8.5	11.6	9.2	5.9	5.6	6.6	4.2	8.4	11.9	10.7	19.7
XZ009	申扎县	2019-11-27 11:00:00	0	0.1	0	0	0.3	0.2	2.5	3.1	3.5	5.2	5.1	5.6	6	5.4	8.6	7.5	7.2	8	7.7	9.7	8.3	8.5	11.6	9.2	5.9	5.6	6.6	4.3	8.4	11.9	10.6	19.6
XZ009	申扎县	2019-11-27 12:00:00	0	0.1	0	0	0.3	0.2	2.2	2.9	3.4	5.2	5.1	5.6	6	5.4	8.6	7.5	7.2	8	7.7	9.8	8.3	8.5	11.6	9.2	5.9	5.6	6.6	4.2	8.4	11.9	10.7	19.6
XZ009	申扎县	2019-11-27 13:00:00	0	0.3	0	0	0.4	0.2	2.1	2.8	3.4	5.2	5.1	5.6	6	5.4	8.6	7.5	7.2	8	7.7	9.8	8.3	8.5	11.6	9.2	5.9	5.6	6.6	4.3	8.3	11.9	10.6	19.7
XZ009	申扎县	2019-11-27 14:00:00	0.1	0.5	0.1	0	0.4	0.3	2	2.6	3.4	5.2	5.1	5.6	6	5.4	8.6	7.5	7.2	8	7.7	9.8	8.3	8.5	11.7	9.2	5.9	5.6	6.6	4.3	8.3	11.9	10.7	19.7
XZ009	申扎县	2019-11-27 15:00:00	0.2	1.2	0.2	0.1	0.5	0.3	2	2.5	3.4	5.2	5.1	5.6	6	5.4	8.6	7.6	7.2	8	7.7	9.8	8.3	8.5	11.6	9.2	5.9	5.6	6.6	4.3	8.3	11.9	10.7	19.7
XZ009	申扎县	2019-11-27 16:00:00	0.2	1.8	0.3	0.1	0.5	0.3	2	2.5	3.3	5.2	5.1	5.6	6	5.4	8.6	7.6	7.2	8	7.7	9.7	8.3	8.5	11.6	9.2	5.9	5.6	6.6	4.2	8.3	11.9	10.7	19.7
XZ009	申扎县	2019-11-27 17:00:00	0.2	1.9	0.6	0.2	0.6	0.4	2	2.5	3.3	5.2	5.1	5.6	6	5.4	8.6	7.6	7.2	8	7.7	9.8	8.3	8.5	11.6	9.2	5.9	5.6	6.6	4.2	8.3	11.9	10.7	19.6
XZ009	申扎县	2019-11-27 18:00:00	0.2	1.7	1.1	0.3	0.6	0.4	2	2.5	3.3	5.2	5.1	5.6	6	5.4	8.6	7.6	7.2	8	7.7	9.8	8.3	8.5	11.6	9.2	5.9	5.6	6.6	4.2	8.3	11.9	10.6	19.6
XZ009	申扎县	2019-11-27 19:00:00	0.1	1.6	1.2	0.3	0.7	0.4	2	2.5	3.3	5.2	5.1	5.6	6	5.4	8.6	7.6	7.2	8	7.7	9.7	8.3	8.5	11.6	9.2	5.9	5.6	6.6	4.2	8.3	11.9	10.7	19.7
XZ009	申扎县	2019-11-27 20:00:00	0.1	1.5	1.1	0.4	0.7	0.4	2	2.5	3.2	5.2	5.1	5.5	6	5.4	8.6	7.6	7.2	8	7.6	9.7	8.3	8.5	11.6	9.1	5.9	5.6	6.6	4.2	8.3	11.9	10.7	19.6
XZ009	申扎县	2019-11-27 21:00:00	0	1.3	0.8	0.4	0.7	0.5	2	2.5	3.3	5.2	5	5.6	6	5.4	8.6	7.6	7.2	8	7.7	9.7	8.3	8.5	11.6	9.2	5.9	5.6	6.6	4.2	8.3	11.9	10.7	19.6
XZ009	申扎县	2019-11-27 22:00:00	0	0.9	0.7	0.4	0.7	0.5	2.1	2.5	3.2	5.2	5.1	5.6	6	5.4	8.5	7.6	7.2	8	7.7	9.7	8.3	8.5	11.6	9.2	5.9	5.6	6.6	4.3	8.3	11.9	10.6	19.6
XZ009	申扎县	2019-11-28 00:00:00	0	0.4	0.4	0.3	0.7	0.5	2.2	2.6	3.3	5.2	5.1	5.6	6	5.4	8.6	7.5	7.2	7.9	7.6	9.7	8.2	8.5	11.6	9.2	5.9	5.6	6.6	4.2	8.3	11.9	10.6	19.6
XZ009	申扎县	2019-11-28 01:00:00	0	0.3	0.2	0.3	0.7	0.5	2.3	2.6	3.3	5.2	5.1	5.5	6	5.4	8.6	7.5	7.2	7.9	7.6	9.7	8.3	8.4	11.6	9.1	5.9	5.6	6.6	4.2	8.3	11.9	10.6	19.7
XZ009	申扎县	2019-11-28 02:00:00	0	0.3	0.2	0.2	0.7	0.5	2.4	2.7	3.3	5.1	5	5.5	6	5.4	8.5	7.5	7.2	7.9	7.6	9.7	8.2	8.5	11.6	9.2	5.8	5.6	6.5	4.2	8.3	11.9	10.6	19.6
XZ009	申扎县	2019-11-28 03:00:00	0	0.2	0.1	0.2	0.7	0.5	2.5	2.7	3.3	5.2	5	5.5	6	5.4	8.6	7.5	7.2	7.9	7.6	9.7	8.2	8.4	11.6	9.1	5.8	5.6	6.6	4.2	8.3	11.9	10.6	19.6
XZ009	申扎县	2019-11-28 04:00:00	0	0.1	0.1	0.1	0.6	0.5	2.5	2.7	3.3	5.1	5	5.5	6	5.4	8.5	7.5	7.2	7.9	7.6	9.7	8.2	8.4	11.6	9.1	5.8	5.6	6.6	4.2	8.3	11.9	10.6	19.6
XZ009	申扎县	2019-11-28 05:00:00	0	0.1	0	0.1	0.5	0.4	2.6	2.7	3.3	5.1	5	5.5	6	5.3	8.6	7.5	7.2	7.9	7.6	9.7	8.2	8.4	11.6	9.1	5.8	5.6	6.6	4.2	8.3	11.8	10.6	19.6
XZ009	申扎县	2019-11-28 06:00:00	0	0.1	0	0	0.5	0.4	2.5	2.7	3.3	5.1	5	5.5	6	5.3	8.5	7.5	7.2	7.9	7.6	9.7	8.2	8.4	11.5	9.1	5.8	5.6	6.6	4.2	8.3	11.8	10.6	19.6
XZ009	申扎县	2019-11-28 08:00:00	0	0	0	0	0.4	0.3	2.2	2.6	3.3	5.1	5	5.5	6	5.4	8.5	7.4	7.2	7.9	7.6	9.7	8.2	8.4	11.5	9.1	5.8	5.5	6.5	4.2	8.3	11.8	10.6	19.6
XZ009	申扎县	2019-11-28 10:00:00	0	0	0	0	0.3	0.2	2	2.3	3.3	5.2	5	5.5	6	5.3	8.5	7.4	7.1	7.9	7.7	9.7	8.2	8.4	11.5	9.1	5.9	5.6	6.6	0	8.3	11.8	10.6	19.6
XZ009	申扎县	2019-12-01 10:00:00	0	0	0	0	0	0	0.4	0.5	0.9	1.7	2	4.3	6	5	8.2	7.2	6.9	7.7	7.4	9.4	8	8.1	11.3	8.8	5.7	5.4	6.4	4.1	8.1	11.6	10.4	19.4
XZ009	申扎县	2019-12-01 11:00:00	0	0	0	0	0	0	0.3	0.5	0.8	1.6	1.9	4.1	6.1	5	8.2	7.1	6.9	7.6	7.4	9.4	8	8.1	11.2	8.8	5.7	5.4	6.4	4.1	8.1	11.6	10.4	19.4
XZ009	申扎县	2019-12-01 12:00:00	0	0	0	0	0	0	0.3	0.4	0.8	1.5	1.8	3.8	6.2	5	8.2	7.2	6.9	7.7	7.4	9.3	8	8.1	11.2	8.8	5.7	5.4	6.4	4.1	8.1	11.6	10.4	19.4
XZ009	申扎县	2019-12-01 13:00:00	0	0.1	0	0	0.1	0	0.3	0.4	0.7	1.4	1.7	3.3	6.2	5.1	8.2	7.2	6.9	7.6	7.4	9.3	7.9	8.1	11.2	8.8	5.7	5.4	6.4	4.1	8.1	11.6	10.4	19.4
XZ009	申扎县	2019-12-01 14:00:00	0	0.1	0	0	0.1	0	0.3	0.4	0.7	1.4	1.6	2.8	6.1	5.1	8.2	7.2	6.9	7.7	7.4	9.4	8	8.1	11.2	8.8	5.7	5.4	6.4	4.1	8.1	11.6	10.4	19.4
XZ009	申扎县	2019-12-01 15:00:00	0	0.2	0	0	0.1	0	0.3	0.5	0.8	1.4	1.6	2.4	6	5.1	8.2	7.2	6.9	7.7	7.4	9.4	8	8.1	11.2	8.8	5.7	5.4	6.4	4.1	8.1	11.6	10.4	19.4
XZ009	申扎县	2019-12-01 16:00:00	0	0.4	0	0	0.1	0	0.4	0.5	0.8	1.4	1.6	2.2	5.8	5.2	8.2	7.2	6.9	7.7	7.4	9.4	8	8.1	11.3	8.8	5.6	5.4	6.4	4.1	8.1	11.6	10.4	19.4
XZ009	申扎县	2019-12-01 17:00:00	0	0.5	0	0	0.2	0	0.4	0.5	0.8	1.4	1.6	2	5.6	5.2	8.2	7.2	7	7.7	7.4	9.4	8	8.1	11.2	8.8	5.7	5.4	6.4	4.1	8.1	11.6	10.4	19.4
XZ009	申扎县	2019-12-01 18:00:00	0	0.6	0.1	0	0.2	0	0.4	0.6	0.8	1.4	1.6	2	5.4	5.2	8.3	7.2	6.9	7.7	7.4	9.4	8	8.1	11.2	8.8	5.7	5.4	6.4	4.1	8.1	11.6	10.4	19.4
XZ009	申扎县	2019-12-01 19:00:00	0	0.5	0.1	0	0.2	0	0.4	0.6	0.8	1.4	1.6	1.9	5.2	5.2	8.2	7.2	6.9	7.7	7.4	9.4	8	8.1	11.3	8.8	5.7	5.4	6.4	4.1	8.1	11.6	10.4	19.4
XZ009	申扎县	2019-12-01 20:00:00	0	0.3	0	0	0.2	0.1	0.5	0.6	0.8	1.4	1.6	1.9	5	5.2	8.2	7.2	6.9	7.7	7.3	9.3	7.9	8.1	11.2	8.8	5.7	5.4	6.4	4.1	8.1	11.6	10.4	19.4
XZ009	申扎县	2019-12-01 21:00:00	0	0.2	0	0	0.2	0.1	0.5	0.6	0.9	1.4	1.6	1.9	4.8	5.1	8.2	7.2	7	7.7	7.3	9.3	8	8.1	11.2	8.8	5.7	5.4	6.4	4.1	8.1	11.6	10.4	19.4
XZ009	申扎县	2019-12-01 22:00:00	0	0.1	0	0	0.2	0.1	0.5	0.7	0.9	1.4	1.6	2	4.7	5.1	8.2	7.2	6.9	7.6	7.3	9.3	8	8.1	11.2	8.8	5.7	5.4	6.4	4.1	8.1	11.6	10.4	19.4
XZ009	申扎县	2019-12-01 23:00:00	0	0.1	0	0	0.2	0.1	0.5	0.7	0.9	1.4	1.7	1.9	4.6	5	8.2	7.1	6.9	7.6	7.3	9.3	8	8.1	11.2	8.8	5.6	5.4	6.4	4.1	8.1	11.6	10.4	19.4
XZ009	申扎县	2019-12-02 00:00:00	0	0	0	0	0.2	0	0.5	0.7	0.9	1.4	1.7	2	4.5	5	8.2	7.1	6.9	7.6	7.3	9.3	7.9	8.1	11.2	8.8	5.6	5.4	6.4	4.1	8.1	11.6	10.4	19.4
XZ009	申扎县	2019-12-02 01:00:00	0	0	0	0	0.1	0	0.5	0.7	0.9	1.5	1.7	2	4.4	5	8.2	7.1	6.9	7.6	7.3	9.3	8	8	11.2	8.8	5.6	5.4	6.4	4.1	8.1	11.6	10.3	19.4
XZ009	申扎县	2019-12-02 02:00:00	0	0	0	0	0.1	0	0.5	0.6	0.9	1.4	1.6	2	4.3	4.9	8.2	7.1	6.9	7.6	7.3	9.3	7.9	8	11.2	8.8	5.6	5.4	6.4	4.1	8.2	11.6	10.3	19.3
XZ009	申扎县	2019-12-02 03:00:00	0	0	0	0	0.1	0	0.4	0.6	0.8	1.4	1.6	2	4.2	4.9	8.1	7.1	6.9	7.6	7.3	9.3	7.9	8	11.1	8.8	5.6	5.4	6.4	4.1	8.2	11.6	10.3	19.3
XZ009	申扎县	2019-12-02 04:00:00	0	0	0	0	0.1	0	0.4	0.6	0.8	1.4	1.6	1.9	4.1	4.8	8.1	7.1	6.9	7.6	7.3	9.3	7.9	8	11.1	8.8	5.6	5.4	6.4	4.1	8.1	11.6	10.3	19.4
XZ009	申扎县	2019-12-02 05:00:00	0	0	0	0	0.1	0	0.4	0.5	0.8	1.4	1.6	1.9	3.9	4.8	8.1	7	6.9	7.6	7.3	9.3	7.9	8	11.1	8.7	5.6	5.4	6.4	4.1	8.1	11.6	10.3	19.3
XZ009	申扎县	2019-12-02 06:00:00	0	0	0	0	0	0	0.3	0.5	0.7	1.3	1.5	1.9	3.8	4.7	8.1	7	6.9	7.6	7.3	9.3	7.9	8	11.1	8.8	5.6	5.3	6.4	4.1	8.1	11.6	10.3	19.3
XZ009	申扎县	2019-12-02 07:00:00	0	0	0	0	0	0	0.3	0.4	0.7	1.3	1.5	1.9	3.5	4.7	8.1	7	6.9	7.6	7.3	9.3	7.9	8	11.1	8.7	5.6	5.4	6.3	4.1	8.1	11.6	10.3	19.3
XZ009	申扎县	2019-12-02 08:00:00	0	0	0	0	0	0	0.3	0.4	0.7	1.3	1.4	1.8	3.3	4.6	8.1	7	6.8	7.6	7.2	9.2	7.9	8	11.1	8.8	5.6	5.3	6.3	4	8.1	11.6	10.4	19.3
XZ009	申扎县	2019-12-02 09:00:00	0	0	0	0	0	0	0.3	0.4	0.6	1.2	1.4	1.8	3	4.5	8.1	7	6.9	7.5	7.2	9.2	7.9	8	11.1	8.7	5.6	5.3	6.3	4.1	8.1	11.6	10.3	19.3
XZ009	申扎县	2019-12-02 10:00:00	0	0	0	0	0	0	0.3	0.3	0.6	1.2	1.3	1.8	2.8	4.5	8	6.9	6.8	7.6	7.3	9.2	7.9	8	11.1	8.7	5.6	5.3	6.3	4	8.1	11.6	10.3	19.3
XZ009	申扎县	2019-12-02 11:00:00	0	0	0	0	0	0	0.2	0.3	0.6	1.1	1.3	1.7	2.6	4.3	8	6.9	6.8	7.6	7.3	9.2	7.9	7.9	11.1	8.7	5.6	5.3	6.3	4	8	11.6	10.3	19.3
XZ009	申扎县	2019-12-02 12:00:00	0	0	0	0	0	0	0.2	0.3	0.6	1.1	1.2	1.7	2.5	4.1	7.9	6.9	6.8	7.6	7.3	9.2	7.9	8	11.1	8.7	5.6	5.3	6.3	4	8.1	11.6	10.3	19.3
XZ009	申扎县	2019-12-02 13:00:00	0	0	0	0	0	0	0.2	0.3	0.6	1	1.2	1.6	2.4	3.9	7.9	6.9	6.8	7.6	7.3	9.2	7.9	7.9	11.1	8.7	5.6	5.4	6.3	4	8.1	11.6	10.3	19.3
XZ009	申扎县	2019-12-02 14:00:00	0	0.1	0	0	0.1	0	0.2	0.3	0.6	1	1.1	1.6	2.3	3.7	7.8	7	6.8	7.6	7.3	9.3	7.9	8	11.1	8.7	5.6	5.3	6.3	4	8.1	11.6	10.3	19.3
XZ009	申扎县	2019-12-02 15:00:00	0	0.2	0	0	0.1	0	0.3	0.3	0.6	1	1.1	1.6	2.2	3.4	7.7	7	6.9	7.6	7.3	9.2	7.9	8	11.1	8.7	5.6	5.3	6.3	4	8	11.6	10.3	19.3
XZ009	申扎县	2019-12-02 16:00:00	0	0.3	0	0	0.1	0	0.3	0.4	0.6	1	1.1	1.5	2.2	3.1	7.6	7	6.8	7.6	7.3	9.2	7.9	7.9	11.1	8.7	5.6	5.3	6.4	4	8.1	11.5	10.3	19.3
XZ009	申扎县	2019-12-02 17:00:00	0	0.5	0	0	0.1	0	0.3	0.4	0.6	1.1	1.1	1.5	2.2	2.8	7.5	7.1	6.8	7.6	7.3	9.2	7.9	8	11.1	8.7	5.6	5.4	6.3	4	8.1	11.6	10.3	19.3
XZ009	申扎县	2019-12-02 18:00:00	0	0.5	0.1	0	0.2	0	0.3	0.4	0.6	1.1	1.1	1.5	2.2	2.7	7.3	7.1	6.8	7.6	7.3	9.2	7.9	8	11.1	8.7	5.6	5.3	6.3	4	8.1	11.6	10.3	19.3
XZ009	申扎县	2019-12-02 19:00:00	0	0.4	0	0	0.2	0	0.3	0.5	0.7	1.1	1.1	1.5	2.2	2.5	7.1	7.1	6.8	7.6	7.3	9.2	7.9	8	11.1	8.7	5.6	5.3	6.3	4	8.1	11.6	10.3	19.3
XZ009	申扎县	2019-12-02 20:00:00	0	0.3	0	0	0.2	0	0.4	0.5	0.7	1.1	1.1	1.5	2.2	2.5	7	7.1	6.8	7.6	7.3	9.2	7.9	8	11.1	8.7	5.6	5.3	6.3	4	8.1	11.6	10.3	19.3
XZ009	申扎县	2019-12-02 21:00:00	0	0.2	0	0	0.2	0	0.4	0.5	0.7	1.1	1.2	1.5	2.2	2.4	6.8	7.1	6.8	7.5	7.3	9.2	7.9	8	11.1	8.7	5.6	5.3	6.3	4	8.1	11.6	10.3	19.3
XZ009	申扎县	2019-12-02 22:00:00	0	0.1	0	0	0.2	0	0.4	0.5	0.7	1.2	1.2	1.5	2.2	2.4	6.7	7	6.7	7.5	7.3	9.2	7.9	8	11.1	8.7	5.6	5.3	6.3	4	8.1	11.5	10.3	19.3
XZ009	申扎县	2019-12-02 23:00:00	0	0.1	0	0	0.1	0	0.4	0.5	0.7	1.2	1.2	1.5	2.2	2.3	6.5	7	6.7	7.5	7.3	9.2	7.9	7.9	11	8.7	5.6	5.3	6.3	4	8.1	11.5	10.3	19.3
XZ009	申扎县	2019-12-03 00:00:00	0	0	0	0	0.1	0	0.4	0.5	0.7	1.2	1.2	1.5	2.2	2.3	6.4	6.9	6.7	7.5	7.2	9.2	7.9	7.9	11.1	8.7	5.6	5.3	6.3	4	8.1	11.5	10.3	19.3
XZ009	申扎县	2019-12-03 01:00:00	0	0	0	0	0.1	0	0.4	0.5	0.7	1.2	1.2	1.6	2.2	2.4	6.3	6.9	6.7	7.4	7.2	9.2	7.9	7.9	11.1	8.7	5.6	5.3	6.3	4	8.1	11.6	10.3	19.3
XZ009	申扎县	2019-12-03 02:00:00	0	0	0	0	0.1	0	0.4	0.5	0.7	1.2	1.2	1.5	2.2	2.3	6.2	6.9	6.7	7.4	7.2	9.2	7.9	7.9	11.1	8.7	5.5	5.3	6.3	4	8	11.6	10.2	19.3
XZ009	申扎县	2019-12-03 03:00:00	0	0	0	0	0.1	0	0.4	0.5	0.7	1.2	1.2	1.5	2.2	2.3	6.1	6.8	6.6	7.4	7.2	9.1	7.9	7.9	11	8.7	5.5	5.3	6.3	4	8.1	11.5	10.2	19.3
XZ009	申扎县	2019-12-03 04:00:00	0	0	0	0	0.1	0	0.3	0.5	0.7	1.1	1.2	1.5	2.1	2.3	6	6.8	6.6	7.4	7.2	9.1	7.8	7.9	11	8.7	5.5	5.3	6.3	4	8	11.5	10.2	19.3
XZ009	申扎县	2019-12-03 05:00:00	0	0	0	0	0.1	0	0.3	0.4	0.7	1.1	1.2	1.5	2.1	2.3	5.8	6.7	6.6	7.4	7.2	9.1	7.8	7.9	11	8.7	5.5	5.3	6.3	4	8	11.5	10.2	19.3
XZ009	申扎县	2019-12-03 06:00:00	0	0	0	0	0.1	0	0.3	0.4	0.6	1.1	1.1	1.5	2.1	2.2	5.7	6.7	6.6	7.4	7.2	9.1	7.8	7.9	11	8.7	5.5	5.3	6.3	4	8	11.5	10.2	19.3
XZ009	申扎县	2019-12-03 07:00:00	0	0	0	0	0	0	0.3	0.4	0.6	1.1	1.1	1.5	2.1	2.2	5.6	6.6	6.5	7.3	7.2	9.1	7.8	7.9	11	8.7	5.5	5.3	6.3	4	8	11.5	10.2	19.3
XZ009	申扎县	2019-12-03 08:00:00	0	0	0	0	0	0	0.3	0.4	0.6	1.1	1.1	1.5	2	2.2	5.4	6.6	6.5	7.3	7.2	9.1	7.8	7.9	11	8.6	5.5	5.3	6.3	4	8	11.5	10.2	19.3
XZ009	申扎县	2019-12-03 09:00:00	0	0	0	0	0	0	0.3	0.4	0.6	1.1	1.1	1.5	2	2.1	5.2	6.5	6.5	7.3	7.2	9.1	7.8	7.9	11	8.6	5.5	5.3	6.3	4	8	11.5	10.2	19.3
XZ009	申扎县	2019-12-03 10:00:00	0	0	0	0	0	0	0.3	0.3	0.6	1.1	1.1	1.4	2	2.1	5	6.4	6.4	7.3	7.2	9.1	7.8	7.9	11	8.6	5.5	5.3	6.3	4	8	11.5	10.2	19.3
XZ009	申扎县	2019-12-03 11:00:00	0	0	0	0	0	0	0.3	0.3	0.6	1	1	1.4	1.9	2.1	4.8	6.4	6.4	7.3	7.2	9.1	7.8	7.9	11	8.6	5.5	5.3	6.3	4	8	11.5	10.2	19.3
XZ009	申扎县	2019-12-03 12:00:00	0	0	0	0	0	0	0.3	0.3	0.6	1	1.1	1.4	1.9	2.1	4.5	6.3	6.3	7.3	7.3	9.1	7.8	7.9	11	8.6	5.5	5.3	6.3	4	8	11.5	10.2	19.3
XZ009	申扎县	2019-12-03 13:00:00	0	0	0	0	0	0	0.3	0.3	0.6	1	1	1.4	1.9	2	4.3	6.2	6.3	7.2	7.3	9.1	7.8	7.9	11	8.6	5.5	5.3	6.3	4	8	11.5	10.2	19.3
XZ009	申扎县	2019-12-03 14:00:00	0	0	0	0	0.1	0	0.3	0.3	0.6	1	1	1.3	1.8	2	4.1	6.1	6.3	7.2	7.2	9.1	7.8	7.8	11	8.6	5.5	5.3	6.3	4	8	11.5	10.2	19.3
XZ009	申扎县	2019-12-03 15:00:00	0	0	0	0	0.1	0	0.3	0.3	0.6	1	1	1.3	1.8	2	4	5.9	6.2	7.2	7.2	9.1	7.8	7.9	11	8.6	5.5	5.3	6.3	4	8	11.5	10.2	19.2
XZ009	申扎县	2019-12-03 16:00:00	0	0	0	0	0.1	0	0.3	0.3	0.6	1	1	1.3	1.8	2	3.8	5.8	6.2	7.2	7.2	9.1	7.8	7.8	11	8.5	5.5	5.3	6.3	4	8	11.5	10.2	19.2
XZ009	申扎县	2019-12-03 17:00:00	0	0	0	0	0.1	0	0.3	0.4	0.6	1	1	1.3	1.7	1.9	3.7	5.6	6.2	7.2	7.2	9	7.8	7.8	11	8.6	5.5	5.3	6.3	4	8	11.5	10.2	19.2
XZ009	申扎县	2019-12-03 18:00:00	0	0	0	0	0.1	0	0.3	0.4	0.6	1	1	1.3	1.7	1.9	3.6	5.4	6.2	7.1	7.2	9	7.8	7.8	11	8.6	5.5	5.3	6.3	4	8	11.5	10.2	19.2
XZ009	申扎县	2019-12-03 19:00:00	0	0	0	0	0.1	0	0.3	0.4	0.6	1	1	1.3	1.7	1.9	3.6	5.2	6.1	7.1	7.2	9	7.8	7.8	10.9	8.6	5.4	5.3	6.3	4	8	11.5	10.2	19.2
XZ009	申扎县	2019-12-03 20:00:00	0	0	0	0	0.1	0	0.3	0.4	0.6	1	1	1.3	1.7	1.9	3.5	4.9	6.1	7	7.2	9	7.8	7.8	10.9	8.6	5.5	5.3	6.3	4	8	11.5	10.2	19.2
XZ009	申扎县	2019-12-03 21:00:00	0	0	0	0	0.1	0	0.3	0.4	0.6	1	1	1.3	1.7	1.9	3.5	4.7	6.1	7	7.2	9	7.7	7.8	10.9	8.6	5.5	5.3	6.3	4	8	11.5	10.2	19.2
XZ009	申扎县	2019-12-03 22:00:00	0	0	0	0	0.1	0	0.3	0.4	0.6	1	1	1.3	1.7	1.8	3.5	4.4	6.1	7	7.2	9	7.7	7.8	11	8.6	5.5	5.3	6.3	4	8	11.5	10.2	19.2
XZ009	申扎县	2019-12-03 23:00:00	0	0	0	0	0	0	0.3	0.4	0.6	1	1	1.3	1.6	1.8	3.5	4.2	6.1	6.9	7.2	9	7.7	7.8	11	8.6	5.5	5.3	6.2	4	8	11.5	10.2	19.2
XZ009	申扎县	2019-12-04 00:00:00	0	0	0	0	0	0	0.3	0.3	0.6	1	1	1.3	1.6	1.8	3.5	3.9	6	6.8	7.2	9	7.7	7.8	10.9	8.5	5.5	5.3	6.2	4	8	11.4	10.2	19.2
XZ009	申扎县	2019-12-04 01:00:00	0	0	0	0	0	0	0.3	0.3	0.6	1	1	1.3	1.6	1.8	3.5	3.7	5.9	6.8	7.1	9	7.7	7.8	10.9	8.6	5.5	5.2	6.2	4	8	11.5	10.2	19.2
XZ009	申扎县	2019-12-04 02:00:00	0	0	0	0	0	0	0.3	0.3	0.6	1	1	1.3	1.6	1.8	3.5	3.5	5.9	6.8	7.1	8.9	7.7	7.7	10.9	8.5	5.5	5.2	6.2	4	8	11.5	10.2	19.2
XZ009	申扎县	2019-12-04 03:00:00	0	0	0	0	0	0	0.2	0.3	0.6	1	0.9	1.3	1.6	1.7	3.5	3.3	5.8	6.7	7.1	8.9	7.7	7.7	10.9	8.5	5.5	5.2	6.2	4	8	11.4	10.1	19.2
XZ009	申扎县	2019-12-04 04:00:00	0	0	0	0	0	0	0.2	0.3	0.5	1	0.9	1.3	1.6	1.7	3.5	3.1	5.7	6.7	7.1	8.9	7.7	7.7	10.9	8.5	5.4	5.3	6.2	4	8	11.4	10.1	19.2
XZ009	申扎县	2019-12-04 05:00:00	0	0	0	0	0	0	0.2	0.3	0.5	1	0.9	1.2	1.5	1.7	3.5	3	5.6	6.6	7.1	8.9	7.7	7.7	10.8	8.5	5.5	5.2	6.2	4	8	11.4	10.1	19.2
XZ009	申扎县	2019-12-04 06:00:00	0	0	0	0	0	0	0.2	0.2	0.5	0.9	0.9	1.2	1.5	1.7	3.5	2.9	5.4	6.6	7.1	8.9	7.7	7.7	10.9	8.5	5.4	5.2	6.2	4	8	11.4	10.1	19.2
XZ009	申扎县	2019-12-04 07:00:00	0	0	0	0	0	0	0.2	0.2	0.5	0.9	0.9	1.2	1.5	1.7	3.5	2.8	5.3	6.6	7.1	8.8	7.7	7.7	10.8	8.5	5.4	5.2	6.2	4	8	11.4	10.1	19.2
XZ009	申扎县	2019-12-04 08:00:00	0	0	0	0	0	0	0.2	0.2	0.5	0.9	0.8	1.2	1.5	1.7	3.4	2.7	5.2	6.6	7	8.9	7.7	7.7	10.8	8.5	5.4	5.2	6.3	4	8	11.4	10.1	19.2
XZ009	申扎县	2019-12-04 09:00:00	0	0	0	0	0	0	0.2	0.2	0.5	0.8	0.8	1.1	1.5	1.6	3.4	2.6	5	6.5	7	8.9	7.7	7.7	10.8	8.5	5.4	5.2	6.2	4	7.9	11.4	10.1	19.2
XZ009	申扎县	2019-12-04 10:00:00	0	0	0	0	0	0	0.1	0.2	0.4	0.8	0.8	1.1	1.4	1.6	3.4	2.6	4.8	6.6	7.1	8.9	7.7	7.7	10.8	8.5	5.5	5.2	6.2	4	7.9	11.4	10.1	19.2
XZ009	申扎县	2019-12-04 11:00:00	0	0	0	0	0	0	0.1	0.2	0.4	0.8	0.8	1.1	1.4	1.6	3.3	2.5	4.6	6.5	7.1	8.9	7.7	7.7	10.8	8.5	5.4	5.2	6.2	4	8	11.4	10.1	19.2
XZ009	申扎县	2019-12-04 12:00:00	0	0	0	0	0	0	0.1	0.1	0.4	0.8	0.7	1	1.4	1.6	3.3	2.5	4.3	6.5	7	8.8	7.7	7.7	10.8	8.5	5.4	5.2	6.2	4	7.9	11.4	10.1	19.2
XZ009	申扎县	2019-12-04 13:00:00	0	0	0	0	0	0	0.1	0.1	0.4	0.8	0.7	1	1.3	1.5	3.2	2.5	4.1	6.5	7	8.8	7.7	7.7	10.8	8.5	5.4	5.2	6.2	4	8	11.4	10.1	19.2
XZ009	申扎县	2019-12-04 14:00:00	0	0	0	0	0	0	0.1	0.2	0.4	0.8	0.7	1	1.3	1.5	3.2	2.4	3.8	6.4	7	8.8	7.7	7.7	10.8	8.5	5.4	5.2	6.2	3.9	8	11.4	10.1	19.2
XZ009	申扎县	2019-12-04 15:00:00	0	0	0	0	0	0	0.1	0.2	0.4	0.8	0.7	1	1.3	1.5	3.1	2.4	3.6	6.4	7	8.8	7.7	7.6	10.8	8.4	5.4	5.2	6.2	4	8	11.4	10.1	19.2
XZ009	申扎县	2019-12-04 16:00:00	0	0.1	0	0	0	0	0.2	0.2	0.4	0.8	0.7	1	1.3	1.5	3	2.4	3.4	6.3	6.9	8.8	7.7	7.7	10.8	8.5	5.4	5.2	6.2	3.9	8	11.4	10.1	19.2
XZ009	申扎县	2019-12-04 17:00:00	0	0.1	0	0	0	0	0.2	0.2	0.4	0.8	0.7	1	1.2	1.4	3	2.3	3.2	6.1	6.9	8.8	7.7	7.7	10.8	8.5	5.4	5.2	6.2	3.9	8	11.4	10.1	19.2
XZ009	申扎县	2019-12-04 18:00:00	0	0.1	0	0	0	0	0.2	0.2	0.5	0.8	0.7	1	1.2	1.4	3	2.3	3	5.9	6.9	8.8	7.7	7.7	10.8	8.4	5.4	5.2	6.2	4	8	11.3	10.1	19.2
XZ009	申扎县	2019-12-04 19:00:00	0	0.1	0	0	0	0	0.2	0.2	0.5	0.8	0.7	1	1.2	1.4	3	2.3	2.9	5.7	6.9	8.7	7.7	7.6	10.8	8.5	5.4	5.2	6.2	3.9	8	11.4	10.1	19.2
XZ009	申扎县	2019-12-04 20:00:00	0	0	0	0	0	0	0.2	0.2	0.5	0.8	0.7	1	1.3	1.4	2.9	2.3	2.8	5.4	6.9	8.7	7.6	7.6	10.8	8.5	5.4	5.2	6.2	3.9	8	11.4	10.1	19.1
XZ009	申扎县	2019-12-04 21:00:00	0	0	0	0	0	0	0.2	0.3	0.5	0.8	0.7	1	1.3	1.4	2.9	2.2	2.8	5.2	6.9	8.7	7.6	7.6	10.8	8.5	5.4	5.2	6.2	4	7.9	11.4	10.1	19.1
XZ009	申扎县	2019-12-04 22:00:00	0	0	0	0	0	0	0.2	0.2	0.5	0.8	0.7	1	1.2	1.4	2.9	2.2	2.7	5	6.9	8.7	7.6	7.6	10.7	8.5	5.4	5.2	6.2	3.9	8	11.4	10.1	19.1
XZ009	申扎县	2019-12-04 23:00:00	0	0	0	0	0	0	0.2	0.2	0.5	0.8	0.7	1	1.3	1.4	2.9	2.2	2.7	4.8	6.9	8.7	7.6	7.6	10.7	8.4	5.4	5.2	6.2	3.9	7.9	11.4	10.1	19.1
XZ009	申扎县	2019-12-05 00:00:00	0	0	0	0	0	0	0.2	0.2	0.5	0.8	0.7	1	1.2	1.4	2.9	2.2	2.7	4.6	6.9	8.7	7.6	7.6	10.7	8.4	5.4	5.2	6.2	3.9	7.9	11.4	10.1	19.1
XZ009	申扎县	2019-12-05 01:00:00	0	0	0	0	0	0	0.2	0.2	0.4	0.8	0.7	1	1.2	1.4	2.9	2.2	2.7	4.4	6.8	8.6	7.6	7.6	10.7	8.4	5.4	5.2	6.2	3.9	7.9	11.4	10.1	19.1
XZ009	申扎县	2019-12-05 02:00:00	0	0	0	0	0	0	0.2	0.2	0.4	0.8	0.7	1	1.2	1.4	2.9	2.1	2.6	4.2	6.7	8.6	7.6	7.6	10.7	8.4	5.4	5.2	6.2	3.9	7.9	11.4	10.1	19.1
XZ009	申扎县	2019-12-05 03:00:00	0	0	0	0	0	0	0.1	0.2	0.4	0.8	0.7	1	1.2	1.4	2.9	2.1	2.6	4.1	6.7	8.5	7.6	7.5	10.7	8.4	5.4	5.2	6.2	3.9	7.9	11.4	10	19.1
XZ009	申扎县	2019-12-05 04:00:00	0	0	0	0	0	0	0.1	0.1	0.4	0.7	0.7	0.9	1.2	1.4	2.9	2.1	2.6	4	6.5	8.5	7.5	7.6	10.7	8.4	5.4	5.2	6.2	3.9	7.9	11.4	10.1	19.1
XZ009	申扎县	2019-12-05 05:00:00	0	0	0	0	0	0	0.1	0.1	0.4	0.7	0.7	0.9	1.2	1.3	2.8	2.1	2.6	3.9	6.4	8.4	7.5	7.5	10.7	8.4	5.3	5.2	6.2	3.9	7.9	11.4	10	19.1
XZ009	申扎县	2019-12-05 06:00:00	0	0	0	0	0	0	0.1	0.1	0.4	0.7	0.6	0.9	1.1	1.3	2.8	2	2.6	3.8	6.3	8.4	7.5	7.5	10.6	8.4	5.4	5.2	6.1	3.9	7.9	11.4	10	19.1
XZ009	申扎县	2019-12-05 07:00:00	0	0	0	0	0	0	0.1	0.1	0.4	0.7	0.6	0.9	1.1	1.3	2.8	2	2.5	3.7	6.1	8.3	7.4	7.5	10.6	8.4	5.3	5.1	6.1	3.9	7.9	11.4	10	19
XZ009	申扎县	2019-12-05 08:00:00	0	0	0	0	0	0	0.1	0.1	0.3	0.7	0.6	0.8	1.1	1.3	2.7	2	2.5	3.6	5.8	8.2	7.4	7.5	10.6	8.4	5.3	5.1	6.2	3.9	7.9	11.3	10	19
XZ009	申扎县	2019-12-05 09:00:00	0	0	0	0	0	0	0.1	0.1	0.3	0.6	0.6	0.8	1.1	1.2	2.7	2	2.4	3.5	5.7	8.1	7.4	7.5	10.6	8.3	5.3	5.1	6.2	3.9	7.9	11.3	10.1	19
XZ009	申扎县	2019-12-05 10:00:00	0	0	0	0	0	0	0.1	0	0.3	0.6	0.6	0.8	1	1.2	2.7	1.9	2.4	3.5	5.5	8	7.3	7.5	10.6	8.4	5.4	5.1	6.1	3.9	7.9	11.3	10	19
XZ009	申扎县	2019-12-05 11:00:00	0	0	0	0	0	0	0.1	0	0.3	0.6	0.5	0.8	1	1.2	2.6	1.9	2.4	3.4	5.3	7.9	7.3	7.5	10.6	8.3	5.3	5.1	6.1	3.9	7.9	11.3	10	19
XZ009	申扎县	2019-12-05 12:00:00	0	0	0	0	0	0	0.1	0	0.3	0.6	0.5	0.7	1	1.1	2.6	1.8	2.3	3.3	5	7.8	7.3	7.5	10.6	8.4	5.3	5.1	6.1	3.9	7.9	11.3	10	19
XZ009	申扎县	2019-12-05 13:00:00	0	0	0	0	0	0	0.1	0	0.3	0.5	0.5	0.7	0.9	1.1	2.5	1.8	2.3	3.3	4.7	7.7	7.2	7.5	10.6	8.4	5.3	5.1	6.1	3.9	7.9	11.3	10	19
XZ009	申扎县	2019-12-05 14:00:00	0	0.1	0	0	0	0	0.1	0	0.3	0.5	0.5	0.7	0.9	1.1	2.5	1.8	2.2	3.2	4.5	7.5	7.2	7.5	10.6	8.4	5.3	5.1	6.1	3.9	7.9	11.3	10	19.1
XZ009	申扎县	2019-12-05 15:00:00	0	0.2	0	0	0	0	0.1	0.1	0.3	0.6	0.5	0.7	0.9	1.1	2.4	1.7	2.2	3.2	4.2	7.4	7.1	7.4	10.6	8.3	5.3	5.1	6.1	3.9	7.9	11.3	10	19
XZ009	申扎县	2019-12-05 16:00:00	0	0.3	0	0	0	0	0.1	0.1	0.3	0.6	0.5	0.7	0.9	1	2.4	1.7	2.1	3.1	4	7.2	7.1	7.4	10.6	8.3	5.3	5.1	6.1	3.9	7.9	11.3	10	19
XZ009	申扎县	2019-12-05 17:00:00	0	0.5	0	0	0	0	0.1	0.1	0.4	0.6	0.5	0.7	0.9	1	2.4	1.7	2.1	3	3.8	6.9	7	7.4	10.6	8.3	5.3	5.1	6.1	3.9	7.9	11.3	10	19.1
XZ009	申扎县	2019-12-05 18:00:00	0	0.6	0	0	0.1	0	0.2	0.2	0.4	0.7	0.6	0.7	0.9	1	2.4	1.7	2.1	3	3.6	6.8	7	7.4	10.6	8.3	5.3	5.1	6.1	3.9	7.9	11.3	10	19.1
XZ009	申扎县	2019-12-05 19:00:00	0	0.4	0	0	0.1	0	0.2	0.2	0.4	0.7	0.6	0.8	0.9	1	2.4	1.7	2	2.9	3.4	6.5	6.9	7.4	10.5	8.3	5.3	5.1	6.1	3.9	7.9	11.3	10	19.1
XZ009	申扎县	2019-12-05 20:00:00	0	0.3	0	0	0.1	0	0.2	0.2	0.4	0.7	0.6	0.8	0.9	1.1	2.4	1.6	2	2.9	3.3	6.2	6.9	7.4	10.6	8.3	5.3	5.1	6.1	3.9	7.9	11.3	10	19
XZ009	申扎县	2019-12-05 21:00:00	0	0.1	0	0	0.1	0	0.2	0.2	0.5	0.7	0.6	0.8	1	1.1	2.4	1.7	2	2.9	3.3	5.9	6.8	7.4	10.6	8.3	5.3	5.1	6.1	3.9	7.9	11.3	10	19
XZ009	申扎县	2019-12-05 22:00:00	0	0.1	0	0	0.1	0	0.2	0.3	0.5	0.7	0.6	0.8	1	1.1	2.4	1.6	2	2.9	3.2	5.7	6.7	7.4	10.6	8.3	5.3	5.1	6.1	3.9	7.9	11.3	10	19
XZ009	申扎县	2019-12-05 23:00:00	0	0	0	0	0.1	0	0.2	0.3	0.5	0.8	0.6	0.8	1	1.1	2.4	1.7	2	2.8	3.1	5.4	6.7	7.3	10.6	8.3	5.3	5.1	6.1	3.9	7.9	11.3	10	19
XZ009	申扎县	2019-12-06 00:00:00	0	0	0	0	0	0	0.2	0.3	0.5	0.8	0.7	0.8	1	1.1	2.4	1.7	2	2.8	3.1	5.2	6.6	7.3	10.6	8.3	5.3	5.1	6.1	3.9	7.9	11.3	10	19
XZ009	申扎县	2019-12-06 01:00:00	0	0	0	0	0	0	0.2	0.2	0.5	0.8	0.7	0.8	1	1.1	2.4	1.7	2	2.8	3	5	6.5	7.3	10.6	8.2	5.2	5.1	6.1	3.9	7.9	11.3	9.9	19
XZ009	申扎县	2019-12-06 02:00:00	0	0	0	0	0	0	0.2	0.2	0.4	0.8	0.6	0.8	1	1.1	2.4	1.7	2	2.8	3	4.8	6.4	7.3	10.5	8.2	5.2	5.1	6.1	3.9	7.9	11.3	10	19
XZ009	申扎县	2019-12-06 03:00:00	0	0	0	0	0	0	0.2	0.2	0.4	0.7	0.6	0.8	1	1.1	2.4	1.7	2	2.8	3	4.6	6.3	7.2	10.5	8.2	5.2	5.1	6.1	3.9	7.9	11.3	10	19
XZ009	申扎县	2019-12-06 04:00:00	0	0	0	0	0	0	0.2	0.2	0.4	0.7	0.6	0.8	1	1.1	2.4	1.7	2	2.8	3	4.5	6.2	7.2	10.5	8.2	5.2	5.1	6.1	3.9	7.9	11.3	10	19
XZ009	申扎县	2019-12-06 05:00:00	0	0	0	0	0	0	0.1	0.2	0.4	0.7	0.6	0.8	1	1.1	2.4	1.6	2	2.8	3	4.4	6.1	7.2	10.5	8.2	5.2	5.1	6.1	3.9	7.9	11.3	9.9	18.9
XZ009	申扎县	2019-12-06 06:00:00	0	0	0	0	0	0	0.1	0.1	0.4	0.7	0.6	0.8	1	1.1	2.4	1.7	2	2.8	2.9	4.3	6	7.2	10.5	8.2	5.2	5.1	6.1	3.8	7.9	11.3	10	18.9
XZ009	申扎县	2019-12-06 07:00:00	0	0	0	0	0	0	0.1	0.1	0.4	0.7	0.6	0.8	1	1.1	2.4	1.6	2	2.8	2.9	4.3	5.9	7.1	10.4	8.1	5.2	5.1	6.1	3.9	7.8	11.3	9.9	18.9
XZ009	申扎县	2019-12-06 08:00:00	0	0	0	0	0	0	0.1	0.1	0.4	0.6	0.6	0.8	0.9	1.1	2.4	1.6	2	2.8	2.9	4.2	5.8	7.1	10.4	8.1	5.2	5.1	6.1	3.8	7.9	11.3	9.9	18.9
XZ009	申扎县	2019-12-06 09:00:00	0	0	0	0	0	0	0.1	0.1	0.3	0.6	0.6	0.8	0.9	1.1	2.4	1.6	2	2.7	2.8	4.1	5.6	7	10.4	8.1	5.2	5.1	6	3.8	7.9	11.3	9.9	18.9
XZ009	申扎县	2019-12-06 10:00:00	0	0	0	0	0	0	0.1	0.1	0.3	0.6	0.5	0.7	0.9	1.1	2.3	1.6	1.9	2.8	2.8	4.1	5.5	6.9	10.4	8.1	5.2	5.1	6	3.8	7.8	11.3	9.9	18.9
XZ009	申扎县	2019-12-06 11:00:00	0	0	0	0	0	0	0.1	0.1	0.3	0.6	0.5	0.7	0.9	1	2.3	1.6	1.9	2.7	2.7	4	5.4	6.8	10.4	8.1	5.2	5.1	6	3.8	7.9	11.3	9.9	18.9
XZ009	申扎县	2019-12-06 12:00:00	0	0	0	0	0	0	0.1	0.1	0.3	0.6	0.5	0.7	0.9	1	2.3	1.6	1.9	2.7	2.8	4	5.2	6.8	10.3	8.1	5.2	5.1	6	3.8	7.9	11.3	9.9	18.9
XZ009	申扎县	2019-12-06 13:00:00	0	0	0	0	0	0	0.1	0.1	0.3	0.6	0.5	0.7	0.9	1	2.3	1.6	1.9	2.7	2.7	3.9	5.1	6.7	10.3	8.1	5.2	5	6	3.8	7.8	11.3	9.9	18.9
XZ009	申扎县	2019-12-06 14:00:00	0	0.1	0	0	0	0	0.1	0.1	0.3	0.6	0.5	0.7	0.9	1	2.3	1.5	1.8	2.7	2.7	3.9	5	6.7	10.2	8	5.1	5	6	3.8	7.9	11.3	9.9	18.9
XZ009	申扎县	2019-12-06 15:00:00	0	0.2	0	0	0	0	0.1	0.1	0.4	0.6	0.5	0.7	0.9	1	2.3	1.5	1.8	2.6	2.7	3.8	4.8	6.5	10.2	8	5.1	5	6	3.8	7.9	11.3	9.9	18.9
XZ009	申扎县	2019-12-06 16:00:00	0	0.4	0	0	0	0	0.1	0.1	0.4	0.6	0.5	0.7	0.9	1	2.2	1.5	1.8	2.6	2.6	3.7	4.7	6.4	10.2	8	5.1	5	6	3.8	7.9	11.2	9.9	18.9
XZ009	申扎县	2019-12-06 17:00:00	0	0.6	0	0	0.1	0	0.2	0.2	0.4	0.6	0.5	0.7	0.9	1	2.2	1.5	1.8	2.6	2.6	3.7	4.5	6.3	10.2	7.9	5.1	5	6	3.8	7.8	11.2	9.9	18.9
XZ009	申扎县	2019-12-06 18:00:00	0	0.8	0	0	0.1	0	0.2	0.2	0.4	0.7	0.6	0.7	0.9	1	2.2	1.5	1.7	2.5	2.6	3.7	4.4	6.2	10.2	7.9	5.1	5	6	3.8	7.9	11.3	9.9	18.9
XZ009	申扎县	2019-12-06 19:00:00	0	0.6	0	0	0.1	0	0.2	0.2	0.4	0.7	0.6	0.7	0.9	1	2.2	1.5	1.7	2.5	2.5	3.6	4.3	6.1	10.2	7.9	5.1	5	6	3.8	7.9	11.2	9.9	18.9
XZ009	申扎县	2019-12-06 20:00:00	0	0.3	0	0	0.1	0	0.2	0.2	0.4	0.7	0.6	0.8	0.9	1	2.2	1.5	1.7	2.5	2.5	3.6	4.2	5.9	10.1	7.9	5.1	5	6	3.8	7.9	11.2	9.9	18.9
XZ009	申扎县	2019-12-06 21:00:00	0	0.2	0	0	0.1	0	0.2	0.3	0.5	0.7	0.6	0.8	0.9	1	2.2	1.5	1.7	2.5	2.5	3.6	4.1	5.7	10.1	7.9	5	5	6	3.8	7.8	11.3	9.9	18.9
XZ009	申扎县	2019-12-06 22:00:00	0	0.1	0	0	0.1	0	0.2	0.3	0.5	0.8	0.6	0.8	0.9	1	2.2	1.5	1.7	2.5	2.5	3.6	4	5.6	10.1	7.8	5.1	5	6	3.8	7.8	11.3	9.9	18.8
XZ009	申扎县	2019-12-06 23:00:00	0	0	0	0	0.1	0	0.2	0.3	0.5	0.8	0.6	0.8	1	1	2.3	1.5	1.7	2.5	2.5	3.5	4	5.4	10.1	7.8	5	5	6	3.8	7.9	11.3	9.9	18.8
XZ009	申扎县	2019-12-07 00:00:00	0	0	0	0	0.1	0	0.2	0.3	0.5	0.8	0.7	0.8	1	1	2.3	1.5	1.7	2.5	2.5	3.6	3.9	5.2	10	7.7	5	4.9	6	3.8	7.9	11.2	9.9	18.8
XZ009	申扎县	2019-12-07 01:00:00	0	0	0	0	0	0	0.2	0.3	0.5	0.8	0.7	0.8	1	1.1	2.3	1.5	1.7	2.5	2.5	3.5	3.9	5.1	10	7.7	5	4.9	6	3.8	7.8	11.3	9.9	18.8
XZ009	申扎县	2019-12-07 02:00:00	0	0	0	0	0	0	0.2	0.2	0.5	0.8	0.7	0.8	1	1.1	2.3	1.5	1.8	2.5	2.4	3.5	3.8	4.9	9.9	7.7	5	5	6	3.8	7.8	11.2	9.9	18.8
XZ009	申扎县	2019-12-07 03:00:00	0	0	0	0	0	0	0.2	0.2	0.5	0.8	0.6	0.8	1	1.1	2.3	1.5	1.8	2.5	2.4	3.5	3.8	4.7	9.8	7.7	5	5	6	3.8	7.8	11.2	9.9	18.8
XZ009	申扎县	2019-12-07 04:00:00	0	0	0	0	0	0	0.2	0.2	0.4	0.7	0.6	0.8	1	1.1	2.3	1.5	1.8	2.5	2.4	3.5	3.8	4.6	9.8	7.6	5	4.9	6	3.8	7.8	11.3	9.9	18.8
XZ009	申扎县	2019-12-07 05:00:00	0	0	0	0	0	0	0.2	0.2	0.4	0.7	0.6	0.8	1	1.1	2.3	1.5	1.7	2.5	2.4	3.5	3.8	4.5	9.7	7.6	4.9	4.9	6	3.8	7.8	11.2	9.9	18.8
XZ009	申扎县	2019-12-07 06:00:00	0	0	0	0	0	0	0.2	0.2	0.4	0.7	0.6	0.8	1	1.1	2.3	1.5	1.8	2.5	2.4	3.5	3.8	4.4	9.6	7.6	4.9	4.9	6	3.8	7.8	11.2	9.9	18.8
XZ009	申扎县	2019-12-07 07:00:00	0	0	0	0	0	0	0.1	0.1	0.4	0.7	0.6	0.8	0.9	1	2.3	1.5	1.7	2.5	2.4	3.5	3.8	4.3	9.5	7.5	4.9	4.9	6	3.8	7.8	11.2	9.9	18.7
XZ009	申扎县	2019-12-07 08:00:00	0	0	0	0	0	0	0.1	0.1	0.4	0.7	0.6	0.8	0.9	1	2.3	1.5	1.8	2.5	2.4	3.5	3.8	4.1	9.4	7.5	4.9	4.9	5.9	3.8	7.8	11.2	9.9	18.7
XZ009	申扎县	2019-12-07 09:00:00	0	0	0	0	0	0	0.1	0.1	0.4	0.7	0.6	0.8	0.9	1	2.2	1.5	1.7	2.5	2.4	3.5	3.7	4	9.3	7.5	4.9	4.9	5.9	3.8	7.8	11.2	9.9	18.7
XZ009	申扎县	2019-12-07 10:00:00	0	0	0	0	0	0	0.1	0.1	0.4	0.6	0.6	0.8	0.9	1	2.2	1.5	1.7	2.6	2.4	3.5	3.7	4	9.3	7.4	4.9	4.9	5.9	3.8	7.8	11.2	9.8	18.7
XZ009	申扎县	2019-12-07 11:00:00	0	0	0	0	0	0	0.1	0.1	0.3	0.6	0.5	0.7	0.9	1	2.2	1.5	1.7	2.6	2.4	3.5	3.7	3.9	9.2	7.4	4.9	4.9	5.9	3.8	7.8	11.2	9.9	18.7
XZ009	申扎县	2019-12-07 12:00:00	0	0	0	0	0	0	0.1	0.1	0.3	0.6	0.5	0.7	0.9	1	2.2	1.4	1.7	2.6	2.4	3.5	3.7	3.8	9.1	7.4	4.9	4.9	5.9	3.8	7.8	11.2	9.9	18.7
XZ009	申扎县	2019-12-07 13:00:00	0	0	0	0	0	0	0.1	0.1	0.3	0.6	0.5	0.7	0.9	1	2.2	1.4	1.7	2.5	2.4	3.4	3.6	3.7	9	7.4	4.8	4.9	5.9	3.8	7.8	11.2	9.9	18.7
XZ009	申扎县	2019-12-07 14:00:00	0	0.1	0	0	0	0	0.1	0.1	0.3	0.6	0.5	0.7	0.9	1	2.2	1.4	1.7	2.5	2.3	3.4	3.6	3.6	8.9	7.3	4.8	4.9	5.9	3.8	7.8	11.2	9.9	18.7
XZ009	申扎县	2019-12-07 15:00:00	0	0.2	0	0	0	0	0.1	0.1	0.4	0.6	0.5	0.7	0.9	1	2.2	1.4	1.7	2.5	2.3	3.4	3.6	3.6	8.7	7.3	4.8	4.9	5.9	3.8	7.8	11.2	9.9	18.7
XZ009	申扎县	2019-12-07 16:00:00	0	0.3	0	0	0	0	0.1	0.1	0.4	0.6	0.5	0.7	0.9	1	2.2	1.4	1.6	2.5	2.3	3.3	3.6	3.5	8.6	7.3	4.8	4.8	5.9	3.8	7.8	11.2	9.9	18.7
XZ009	申扎县	2019-12-07 17:00:00	0	0.5	0	0	0.1	0	0.2	0.2	0.4	0.7	0.6	0.7	0.9	1	2.2	1.4	1.6	2.5	2.3	3.4	3.6	3.4	8.4	7.2	4.7	4.8	5.9	3.8	7.8	11.2	9.9	18.8
XZ009	申扎县	2019-12-07 18:00:00	0	0.6	0	0	0.1	0	0.2	0.2	0.4	0.7	0.6	0.7	0.9	1	2.2	1.4	1.6	2.4	2.2	3.3	3.5	3.3	8.3	7.2	4.7	4.8	5.9	3.8	7.8	11.2	9.9	18.8
XZ009	申扎县	2019-12-07 19:00:00	0	0.5	0	0	0.1	0	0.2	0.2	0.4	0.7	0.6	0.7	0.9	1	2.2	1.4	1.6	2.4	2.2	3.3	3.5	3.3	8.1	7.2	4.7	4.8	5.9	3.8	7.8	11.2	9.8	18.7
XZ009	申扎县	2019-12-07 20:00:00	0	0.3	0	0	0.1	0	0.2	0.2	0.5	0.7	0.6	0.8	0.9	1	2.2	1.4	1.6	2.4	2.2	3.3	3.5	3.2	7.9	7.2	4.6	4.8	5.8	3.7	7.8	11.2	9.9	18.7
XZ009	申扎县	2019-12-07 21:00:00	0	0.2	0	0	0.1	0	0.2	0.3	0.5	0.7	0.6	0.8	0.9	1	2.2	1.4	1.6	2.4	2.2	3.3	3.4	3.2	7.6	7.1	4.6	4.8	5.8	3.7	7.8	11.2	9.9	18.7
XZ009	申扎县	2019-12-07 22:00:00	0	0.1	0	0	0.1	0	0.2	0.3	0.5	0.7	0.6	0.8	0.9	1	2.2	1.4	1.6	2.4	2.2	3.3	3.4	3.1	7.4	7.1	4.6	4.8	5.9	3.7	7.8	11.2	9.8	18.7
XZ009	申扎县	2019-12-07 23:00:00	0	0	0	0	0.1	0	0.2	0.3	0.5	0.8	0.6	0.8	0.9	1	2.2	1.4	1.6	2.4	2.2	3.3	3.4	3.1	7.1	7	4.6	4.8	5.8	3.7	7.8	11.2	9.9	18.7
XZ009	申扎县	2019-12-08 00:00:00	0	0	0	0	0.1	0	0.2	0.3	0.5	0.8	0.6	0.8	0.9	1	2.2	1.4	1.6	2.4	2.2	3.2	3.4	3.1	6.8	7	4.5	4.8	5.8	3.7	7.8	11.2	9.8	18.7
XZ009	申扎县	2019-12-08 01:00:00	0	0	0	0	0	0	0.2	0.3	0.5	0.8	0.7	0.8	0.9	1	2.2	1.4	1.6	2.4	2.2	3.2	3.3	3	6.5	6.9	4.5	4.8	5.8	3.7	7.8	11.2	9.8	18.6
XZ009	申扎县	2019-12-08 02:00:00	0	0	0	0	0	0	0.2	0.2	0.5	0.8	0.6	0.8	1	1	2.2	1.4	1.6	2.4	2.2	3.2	3.3	3	6.3	6.8	4.5	4.7	5.8	3.7	7.8	11.2	9.8	18.6
XZ009	申扎县	2019-12-08 03:00:00	0	0	0	0	0	0	0.2	0.2	0.5	0.7	0.6	0.8	1	1	2.2	1.4	1.6	2.4	2.2	3.2	3.3	3	6.1	6.8	4.4	4.7	5.8	3.7	7.8	11.2	9.8	18.6
XZ009	申扎县	2019-12-08 04:00:00	0	0	0	0	0	0	0.2	0.2	0.4	0.7	0.6	0.8	0.9	1	2.2	1.4	1.6	2.4	2.2	3.2	3.3	3	5.8	6.7	4.4	4.7	5.8	3.7	7.8	11.2	9.8	18.6
XZ009	申扎县	2019-12-08 05:00:00	0	0	0	0	0	0	0.2	0.2	0.4	0.7	0.6	0.8	0.9	1	2.2	1.4	1.6	2.4	2.2	3.2	3.3	3	5.7	6.6	4.4	4.7	5.8	3.7	7.8	11.2	9.8	18.6
XZ009	申扎县	2019-12-08 06:00:00	0	0	0	0	0	0	0.2	0.1	0.4	0.7	0.6	0.8	0.9	1	2.2	1.4	1.6	2.4	2.2	3.2	3.3	3	5.5	6.5	4.3	4.7	5.8	3.7	7.8	11.2	9.8	18.6
XZ009	申扎县	2019-12-08 07:00:00	0	0	0	0	0	0	0.1	0.1	0.4	0.7	0.6	0.8	0.9	1	2.2	1.4	1.6	2.4	2.2	3.2	3.3	3	5.3	6.4	4.3	4.7	5.8	3.7	7.7	11.2	9.8	18.6
XZ009	申扎县	2019-12-08 08:00:00	0	0	0	0	0	0	0.1	0.1	0.4	0.7	0.6	0.8	0.9	1	2.2	1.4	1.6	2.4	2.2	3.2	3.3	3	5.2	6.4	4.3	4.7	5.8	3.7	7.7	11.2	9.8	18.5
XZ009	申扎县	2019-12-08 09:00:00	0	0	0	0	0	0	0.1	0.1	0.4	0.6	0.6	0.8	0.9	1	2.2	1.4	1.6	2.4	2.2	3.2	3.3	3	5.1	6.3	4.3	4.7	5.7	3.7	7.8	11.2	9.8	18.5
XZ009	申扎县	2019-12-08 10:00:00	0	0	0	0	0	0	0.1	0.1	0.3	0.6	0.6	0.7	0.9	1	2.2	1.4	1.6	2.5	2.2	3.2	3.2	3	5	6.2	4.3	4.7	5.7	3.7	7.8	11.2	9.8	18.5
XZ009	申扎县	2019-12-08 11:00:00	0	0	0	0	0	0	0.1	0.1	0.3	0.6	0.5	0.7	0.9	1	2.1	1.4	1.6	2.4	2.2	3.2	3.2	3	4.9	6.1	4.3	4.7	5.7	3.7	7.8	11.2	9.8	18.5
XZ009	申扎县	2019-12-08 12:00:00	0	0	0	0	0	0	0.1	0.1	0.3	0.6	0.5	0.7	0.9	1	2.1	1.4	1.6	2.4	2.2	3.2	3.2	3	4.8	6	4.3	4.6	5.7	3.7	7.7	11.2	9.8	18.5
XZ009	申扎县	2019-12-08 13:00:00	0	0	0	0	0	0	0.1	0.1	0.3	0.6	0.5	0.7	0.8	1	2.1	1.3	1.6	2.4	2.2	3.2	3.2	3	4.7	6	4.2	4.6	5.7	3.7	7.7	11.2	9.8	18.5
XZ009	申扎县	2019-12-08 14:00:00	0	0.1	0	0	0	0	0.1	0.1	0.3	0.6	0.5	0.7	0.8	0.9	2.1	1.3	1.5	2.4	2.1	3.2	3.1	3	4.6	5.9	4.2	4.6	5.7	3.7	7.8	11.2	9.8	18.5
XZ009	申扎县	2019-12-08 15:00:00	0	0.2	0	0	0	0	0.1	0.1	0.3	0.6	0.5	0.7	0.8	0.9	2.1	1.3	1.5	2.4	2.2	3.1	3.2	2.9	4.6	5.8	4.2	4.6	5.7	3.7	7.7	11.2	9.8	18.5
XZ009	申扎县	2019-12-08 16:00:00	0	0.3	0	0	0	0	0.1	0.1	0.4	0.6	0.5	0.7	0.8	0.9	2.1	1.3	1.5	2.4	2.1	3.1	3.1	2.9	4.5	5.7	4.2	4.6	5.7	3.7	7.7	11.2	9.8	18.6
XZ009	申扎县	2019-12-08 17:00:00	0	0.4	0	0	0.1	0	0.2	0.1	0.4	0.6	0.5	0.7	0.8	0.9	2.1	1.3	1.5	2.3	2.1	3.1	3.1	2.9	4.5	5.6	4.2	4.5	5.7	3.7	7.8	11.2	9.8	18.6
XZ009	申扎县	2019-12-08 18:00:00	0	0.4	0	0	0.1	0	0.2	0.2	0.4	0.6	0.6	0.7	0.8	0.9	2.1	1.3	1.5	2.3	2.1	3.1	3.1	2.9	4.4	5.4	4.2	4.6	5.7	3.7	7.7	11.1	9.8	18.6
XZ009	申扎县	2019-12-08 19:00:00	0	0.4	0	0	0.1	0	0.2	0.2	0.4	0.7	0.6	0.7	0.9	0.9	2.1	1.3	1.5	2.3	2.1	3.1	3.1	2.8	4.4	5.4	4.1	4.5	5.7	3.7	7.7	11.2	9.8	18.6
XZ009	申扎县	2019-12-08 20:00:00	0	0.2	0	0	0.1	0	0.2	0.2	0.4	0.7	0.6	0.7	0.9	0.9	2.1	1.3	1.5	2.3	2.1	3	3.1	2.8	4.3	5.2	4.1	4.5	5.7	3.7	7.7	11.2	9.8	18.5
XZ009	申扎县	2019-12-08 21:00:00	0	0.1	0	0	0.1	0	0.2	0.2	0.5	0.7	0.6	0.8	0.9	1	2.1	1.3	1.5	2.3	2	3	3.1	2.8	4.3	5.1	4.1	4.5	5.7	3.7	7.7	11.1	9.8	18.5
XZ009	申扎县	2019-12-08 22:00:00	0	0	0	0	0.1	0	0.2	0.3	0.5	0.7	0.6	0.8	0.9	1	2.1	1.3	1.5	2.3	2	3	3	2.8	4.2	4.9	4.1	4.5	5.6	3.7	7.7	11.1	9.8	18.5
XZ009	申扎县	2019-12-08 23:00:00	0	0	0	0	0.1	0	0.2	0.3	0.5	0.7	0.6	0.8	0.9	1	2.1	1.3	1.5	2.3	2	3	3	2.8	4.2	4.8	4.1	4.5	5.6	3.7	7.7	11.2	9.8	18.5
XZ009	申扎县	2019-12-09 00:00:00	0	0	0	0	0	0	0.2	0.2	0.5	0.7	0.6	0.8	0.9	1	2.1	1.3	1.5	2.3	2	3	3	2.8	4.2	4.6	4.1	4.5	5.6	3.7	7.7	11.1	9.8	18.5
XZ009	申扎县	2019-12-09 01:00:00	0	0	0	0	0	0	0.2	0.2	0.5	0.7	0.6	0.8	0.9	1	2.1	1.3	1.5	2.3	2	3	3	2.8	4.2	4.4	4	4.5	5.6	3.7	7.7	11.1	9.8	18.5
XZ009	申扎县	2019-12-09 02:00:00	0	0	0	0	0	0	0.2	0.2	0.4	0.7	0.6	0.8	0.9	1	2.1	1.3	1.5	2.3	2	3	3	2.8	4.1	4.3	4	4.5	5.6	3.7	7.7	11.1	9.8	18.5
XZ009	申扎县	2019-12-09 03:00:00	0	0	0	0	0	0	0.2	0.2	0.4	0.7	0.6	0.8	0.9	1	2.1	1.3	1.5	2.3	2	3	3	2.8	4.1	4.2	3.9	4.4	5.6	3.6	7.7	11.1	9.8	18.4
XZ009	申扎县	2019-12-09 04:00:00	0	0	0	0	0	0	0.2	0.2	0.4	0.7	0.6	0.8	0.9	1	2.1	1.3	1.5	2.3	2	3	3	2.8	4.1	4	3.9	4.4	5.6	3.7	7.7	11.1	9.8	18.4
XZ009	申扎县	2019-12-09 05:00:00	0	0	0	0	0	0	0.1	0.1	0.4	0.7	0.6	0.8	0.9	1	2.1	1.3	1.5	2.3	2	3	3	2.7	4.1	3.9	3.8	4.4	5.6	3.6	7.7	11.1	9.8	18.5
XZ009	申扎县	2019-12-09 06:00:00	0	0	0	0	0	0	0.1	0.1	0.4	0.7	0.6	0.7	0.9	1	2.1	1.3	1.5	2.3	2	3	3	2.7	4.1	3.8	3.8	4.4	5.6	3.6	7.7	11.2	9.8	18.4
XZ009	申扎县	2019-12-09 07:00:00	0	0	0	0	0	0	0.1	0.1	0.4	0.6	0.6	0.7	0.9	1	2.1	1.3	1.5	2.3	2	3	3	2.7	4.1	3.7	3.7	4.4	5.6	3.6	7.7	11.1	9.8	18.4
XZ009	申扎县	2019-12-09 08:00:00	0	0	0	0	0	0	0.1	0.1	0.4	0.6	0.5	0.7	0.9	1	2.1	1.3	1.5	2.3	2	3	3	2.7	4.1	3.6	3.7	4.4	5.5	3.6	7.7	11.1	9.8	18.4
XZ009	申扎县	2019-12-09 09:00:00	0	0	0	0	0	0	0.1	0.1	0.3	0.6	0.5	0.7	0.9	0.9	2.1	1.3	1.5	2.3	2	3	3	2.7	4	3.6	3.6	4.3	5.5	3.6	7.7	11.1	9.7	18.4
XZ009	申扎县	2019-12-09 10:00:00	0	0	0	0	0	0	0.1	0.1	0.3	0.6	0.5	0.7	0.8	0.9	2.1	1.3	1.5	2.3	2	3	3	2.7	4	3.5	3.6	4.4	5.5	3.6	7.7	11.1	9.7	18.4
XZ009	申扎县	2019-12-09 11:00:00	0	0	0	0	0	0	0.1	0	0.3	0.6	0.5	0.7	0.8	0.9	2.1	1.2	1.5	2.3	2	3	3	2.7	4	3.5	3.5	4.3	5.5	3.6	7.7	11.1	9.8	18.4
XZ009	申扎县	2019-12-09 12:00:00	0	0	0	0	0	0	0.1	0	0.3	0.5	0.5	0.7	0.8	0.9	2	1.2	1.5	2.3	2	2.9	3	2.7	4	3.4	3.5	4.3	5.5	3.6	7.7	11.1	9.8	18.4
XZ009	申扎县	2019-12-09 13:00:00	0	0	0	0	0	0	0.1	0	0.3	0.5	0.5	0.7	0.8	0.9	2	1.2	1.4	2.2	2	2.9	3	2.7	4	3.3	3.4	4.3	5.5	3.6	7.7	11.1	9.8	18.4
XZ009	申扎县	2019-12-09 14:00:00	0	0.1	0	0	0	0	0.1	0.1	0.3	0.5	0.5	0.6	0.8	0.9	2	1.2	1.4	2.2	2	2.9	3	2.7	4	3.3	3.3	4.3	5.5	3.6	7.7	11.1	9.8	18.4
XZ009	申扎县	2019-12-09 15:00:00	0	0.1	0	0	0	0	0.1	0.1	0.3	0.6	0.5	0.6	0.8	0.9	2	1.2	1.4	2.2	1.9	2.9	3	2.7	3.9	3.2	3.3	4.2	5.4	3.6	7.7	11.1	9.7	18.4
XZ009	申扎县	2019-12-09 16:00:00	0	0.2	0	0	0	0	0.1	0.1	0.4	0.6	0.5	0.6	0.8	0.9	2	1.2	1.4	2.2	1.9	2.9	2.9	2.6	3.9	3.2	3.2	4.2	5.4	3.6	7.7	11.1	9.8	18.4
XZ009	申扎县	2019-12-09 17:00:00	0	0.3	0	0	0	0	0.1	0.1	0.4	0.6	0.5	0.7	0.8	0.9	2	1.2	1.4	2.2	1.9	2.9	2.9	2.6	3.9	3.1	3.1	4.2	5.4	3.6	7.7	11.1	9.8	18.4
XZ009	申扎县	2019-12-09 18:00:00	0	0.3	0	0	0.1	0	0.2	0.2	0.4	0.6	0.5	0.7	0.8	0.9	2	1.2	1.4	2.1	1.9	2.9	2.9	2.6	3.9	3.1	3	4.2	5.4	3.6	7.7	11.1	9.7	18.4
XZ009	申扎县	2019-12-09 19:00:00	0	0.3	0	0	0.1	0	0.2	0.2	0.4	0.6	0.5	0.7	0.8	0.9	2	1.2	1.4	2.1	1.9	2.8	2.9	2.6	3.8	3.1	2.9	4.1	5.4	3.6	7.7	11.1	9.8	18.4
XZ009	申扎县	2019-12-09 20:00:00	0	0.2	0	0	0.1	0	0.2	0.2	0.4	0.7	0.6	0.7	0.8	0.9	2	1.2	1.4	2.1	1.9	2.8	2.9	2.6	3.8	3	2.8	4.1	5.4	3.6	7.7	11.1	9.7	18.4
XZ009	申扎县	2019-12-09 21:00:00	0	0.1	0	0	0.1	0	0.2	0.2	0.4	0.7	0.6	0.7	0.8	0.9	2	1.2	1.4	2.1	1.9	2.8	2.8	2.6	3.8	3	2.8	4.1	5.3	3.5	7.7	11.1	9.7	18.3
XZ009	申扎县	2019-12-09 22:00:00	0	0	0	0	0.1	0	0.2	0.2	0.4	0.7	0.6	0.7	0.8	0.9	2	1.2	1.4	2.1	1.9	2.8	2.9	2.5	3.7	3	2.6	4.1	5.3	3.5	7.7	11.1	9.8	18.3
XZ009	申扎县	2019-12-09 23:00:00	0	0	0	0	0	0	0.2	0.2	0.4	0.7	0.6	0.7	0.9	0.9	2	1.2	1.4	2.1	1.9	2.8	2.8	2.5	3.7	2.9	2.6	4.1	5.3	3.5	7.6	11.1	9.8	18.3
XZ009	申扎县	2019-12-10 00:00:00	0	0	0	0	0	0	0.2	0.2	0.4	0.7	0.6	0.7	0.9	0.9	2	1.2	1.4	2.1	1.9	2.8	2.8	2.5	3.7	2.9	2.5	4	5.3	3.5	7.6	11.1	9.7	18.3
XZ009	申扎县	2019-12-10 01:00:00	0	0	0	0	0	0	0.2	0.2	0.4	0.7	0.6	0.7	0.9	0.9	2	1.2	1.4	2.1	1.9	2.8	2.8	2.5	3.7	2.9	2.4	3.9	5.2	3.5	7.6	11.1	9.7	18.3
XZ009	申扎县	2019-12-10 02:00:00	0	0	0	0	0	0	0.2	0.2	0.4	0.7	0.6	0.7	0.9	0.9	2	1.2	1.4	2.1	1.9	2.8	2.8	2.5	3.6	2.9	2.3	3.9	5.2	3.5	7.6	11.1	9.7	18.3
XZ009	申扎县	2019-12-10 03:00:00	0	0	0	0	0	0	0.2	0.2	0.4	0.7	0.6	0.7	0.9	0.9	2	1.2	1.4	2.1	1.9	2.8	2.8	2.5	3.6	2.8	2.2	3.8	5.2	3.5	7.6	11.1	9.7	18.3
XZ009	申扎县	2019-12-10 04:00:00	0	0	0	0	0	0	0.2	0.2	0.4	0.7	0.6	0.7	0.9	0.9	2	1.2	1.4	2.1	1.9	2.8	2.8	2.5	3.6	2.8	2.1	3.8	5.2	3.5	7.6	11.1	9.7	18.3
XZ009	申扎县	2019-12-10 05:00:00	0	0	0	0	0	0	0.1	0.1	0.4	0.7	0.6	0.7	0.8	0.9	2	1.2	1.4	2.1	1.9	2.8	2.8	2.5	3.6	2.8	2	3.7	5.1	3.5	7.6	11.1	9.7	18.3
XZ009	申扎县	2019-12-10 06:00:00	0	0	0	0	0	0	0.1	0.1	0.4	0.7	0.6	0.7	0.8	0.9	2	1.2	1.4	2.1	1.9	2.8	2.8	2.5	3.6	2.8	1.9	3.7	5.1	3.5	7.6	11.1	9.7	18.3
XZ009	申扎县	2019-12-10 07:00:00	0	0	0	0	0	0	0.1	0.1	0.4	0.6	0.5	0.7	0.8	0.9	2	1.2	1.4	2.1	1.8	2.8	2.8	2.5	3.6	2.8	1.9	3.6	5.1	3.5	7.6	11.1	9.7	18.3
XZ009	申扎县	2019-12-10 08:00:00	0	0	0	0	0	0	0.1	0.1	0.4	0.6	0.5	0.7	0.8	0.9	2	1.2	1.4	2.1	1.9	2.8	2.8	2.5	3.6	2.8	1.9	3.6	5	3.5	7.6	11.1	9.7	18.2
XZ009	申扎县	2019-12-10 09:00:00	0	0	0	0	0	0	0.1	0.1	0.3	0.6	0.5	0.7	0.8	0.9	2	1.2	1.4	2.1	1.8	2.8	2.8	2.5	3.6	2.8	1.8	3.5	5.1	3.5	7.6	11.1	9.7	18.2
XZ009	申扎县	2019-12-10 10:00:00	0	0	0	0	0	0	0.1	0.1	0.3	0.6	0.5	0.7	0.8	0.9	2	1.2	1.4	2.1	1.8	2.7	2.8	2.5	3.6	2.8	1.8	3.5	5	3.4	7.6	11.1	9.7	18.2
XZ009	申扎县	2019-12-10 11:00:00	0	0	0	0	0	0	0.1	0.1	0.3	0.6	0.5	0.7	0.8	0.9	2	1.2	1.4	2.1	1.8	2.7	2.8	2.5	3.5	2.8	1.8	3.4	5	3.5	7.6	11.1	9.7	18.2
XZ009	申扎县	2019-12-10 12:00:00	0	0	0	0	0	0	0.1	0.1	0.3	0.6	0.5	0.7	0.8	0.9	2	1.2	1.4	2.1	1.8	2.7	2.7	2.5	3.5	2.7	1.7	3.3	5	3.4	7.6	11	9.7	18.2
XZ009	申扎县	2019-12-10 13:00:00	0	0	0	0	0	0	0.1	0.1	0.3	0.5	0.5	0.6	0.8	0.9	2	1.2	1.3	2.1	1.8	2.7	2.8	2.4	3.5	2.7	1.7	3.3	5	3.4	7.6	11.1	9.7	18.2
XZ009	申扎县	2019-12-10 14:00:00	0	0.1	0	0	0	0	0.1	0.1	0.3	0.6	0.5	0.6	0.8	0.9	2	1.1	1.3	2.1	1.8	2.7	2.7	2.4	3.5	2.7	1.7	3.2	4.9	3.4	7.6	11	9.7	18.2
XZ009	申扎县	2019-12-10 15:00:00	0	0.2	0	0	0	0	0.1	0.1	0.3	0.6	0.5	0.6	0.8	0.9	1.9	1.1	1.3	2.1	1.8	2.7	2.7	2.4	3.5	2.7	1.6	3.1	4.9	3.4	7.6	11.1	9.7	18.2
XZ009	申扎县	2019-12-10 16:00:00	0	0.2	0	0	0	0	0.1	0.1	0.4	0.6	0.5	0.6	0.8	0.9	1.9	1.1	1.3	2	1.8	2.7	2.7	2.4	3.5	2.7	1.7	3	4.9	3.4	7.6	11	9.7	18.3
XZ009	申扎县	2019-12-10 17:00:00	0	0.2	0	0	0.1	0	0.2	0.1	0.4	0.6	0.5	0.7	0.8	0.9	1.9	1.1	1.3	2	1.8	2.7	2.7	2.4	3.4	2.7	1.6	3	4.9	3.4	7.6	11.1	9.7	18.3
XZ009	申扎县	2019-12-10 18:00:00	0	0.3	0	0	0.1	0	0.2	0.2	0.4	0.6	0.5	0.7	0.8	0.9	1.9	1.1	1.3	2	1.8	2.6	2.7	2.4	3.4	2.6	1.6	2.9	4.8	3.4	7.6	11	9.7	18.2
XZ009	申扎县	2019-12-10 19:00:00	0	0.2	0	0	0.1	0	0.2	0.2	0.4	0.7	0.6	0.7	0.8	0.9	1.9	1.1	1.3	2	1.8	2.6	2.7	2.4	3.4	2.6	1.6	2.8	4.8	3.4	7.6	11	9.7	18.2
XZ009	申扎县	2019-12-10 20:00:00	0	0.2	0	0	0.1	0	0.2	0.2	0.4	0.7	0.6	0.7	0.8	0.9	2	1.1	1.3	2	1.8	2.6	2.7	2.4	3.4	2.6	1.6	2.7	4.8	3.4	7.5	11	9.7	18.2
XZ009	申扎县	2019-12-10 21:00:00	0	0.1	0	0	0.1	0	0.2	0.2	0.4	0.7	0.6	0.7	0.8	0.9	1.9	1.1	1.3	2	1.8	2.6	2.7	2.4	3.4	2.6	1.6	2.7	4.7	3.4	7.6	11	9.7	18.2
XZ009	申扎县	2019-12-10 22:00:00	0	0.1	0	0	0.1	0	0.2	0.2	0.5	0.7	0.6	0.7	0.8	0.9	2	1.1	1.3	2	1.7	2.6	2.6	2.3	3.4	2.6	1.6	2.6	4.7	3.4	7.6	11.1	9.7	18.2
XZ009	申扎县	2019-12-10 23:00:00	0	0	0	0	0.1	0	0.2	0.2	0.5	0.7	0.6	0.7	0.8	0.9	2	1.1	1.3	2	1.7	2.6	2.6	2.3	3.4	2.6	1.6	2.5	4.7	3.3	7.6	11	9.7	18.2
XZ009	申扎县	2019-12-11 00:00:00	0	0	0	0	0.1	0	0.2	0.2	0.5	0.7	0.6	0.7	0.9	0.9	2	1.1	1.3	2	1.8	2.6	2.6	2.3	3.4	2.6	1.5	2.5	4.6	3.3	7.6	11	9.7	18.2
XZ009	申扎县	2019-12-11 01:00:00	0	0	0	0	0	0	0.2	0.2	0.4	0.7	0.6	0.7	0.9	0.9	2	1.2	1.3	2	1.8	2.6	2.6	2.3	3.4	2.5	1.5	2.4	4.6	3.3	7.6	11	9.7	18.2
XZ009	申扎县	2019-12-11 02:00:00	0	0	0	0	0	0	0.2	0.2	0.4	0.7	0.6	0.7	0.9	0.9	2	1.2	1.3	2	1.8	2.6	2.6	2.3	3.4	2.5	1.5	2.3	4.6	3.3	7.6	11	9.7	18.2
XZ009	申扎县	2019-12-11 03:00:00	0	0	0	0	0	0	0.2	0.2	0.4	0.7	0.6	0.7	0.9	0.9	2	1.2	1.3	2	1.7	2.6	2.6	2.3	3.3	2.5	1.5	2.3	4.5	3.3	7.5	11	9.7	18.1
XZ009	申扎县	2019-12-11 04:00:00	0	0	0	0	0	0	0.2	0.2	0.4	0.7	0.6	0.7	0.9	0.9	2	1.2	1.3	2	1.8	2.6	2.6	2.3	3.4	2.5	1.5	2.2	4.5	3.3	7.5	11.1	9.7	18.1
XZ009	申扎县	2019-12-11 05:00:00	0	0	0	0	0	0	0.2	0.2	0.4	0.7	0.6	0.7	0.9	0.9	2	1.2	1.3	2	1.8	2.6	2.7	2.3	3.3	2.5	1.5	2.2	4.4	3.2	7.5	11	9.7	18.1
XZ009	申扎县	2019-12-11 06:00:00	0	0	0	0	0	0	0.2	0.2	0.4	0.7	0.6	0.7	0.9	0.9	2	1.2	1.3	2	1.8	2.6	2.7	2.3	3.4	2.5	1.5	2.2	4.4	3.2	7.5	11	9.6	18.1
XZ009	申扎县	2019-12-11 07:00:00	0	0	0	0	0	0	0.2	0.2	0.4	0.7	0.6	0.7	0.9	0.9	2	1.2	1.3	2	1.8	2.6	2.6	2.3	3.3	2.5	1.5	2.1	4.3	3.2	7.5	11	9.6	18.1
XZ009	申扎县	2019-12-11 08:00:00	0	0	0	0	0	0	0.2	0.2	0.4	0.7	0.6	0.7	0.8	0.9	2	1.2	1.3	2	1.8	2.6	2.6	2.3	3.3	2.5	1.5	2.1	4.3	3.2	7.5	11	9.6	18.1
XZ009	申扎县	2019-12-11 09:00:00	0	0	0	0	0	0	0.2	0.2	0.4	0.7	0.6	0.7	0.8	0.9	2	1.2	1.3	2	1.8	2.6	2.6	2.4	3.4	2.5	1.5	2.1	4.2	3.2	7.5	11	9.7	18.1
XZ009	申扎县	2019-12-11 10:00:00	0	0	0	0	0	0	0.2	0.2	0.4	0.7	0.6	0.7	0.8	0.9	2	1.2	1.3	2	1.8	2.6	2.6	2.3	3.3	2.5	1.5	2	4.1	3.2	7.5	11	9.6	18.1
XZ009	申扎县	2019-12-11 11:00:00	0	0	0	0	0	0	0.2	0.2	0.4	0.7	0.6	0.7	0.8	0.9	2	1.2	1.3	2	1.8	2.6	2.6	2.3	3.3	2.5	1.5	2	4.1	3.1	7.5	11	9.6	18.1
XZ009	申扎县	2019-12-11 12:00:00	0	0	0	0	0	0	0.2	0.1	0.4	0.7	0.6	0.7	0.8	0.9	2	1.2	1.3	2	1.8	2.6	2.6	2.3	3.3	2.5	1.5	2	4.1	3.1	7.5	11	9.6	18.1
XZ009	申扎县	2019-12-11 13:00:00	0	0	0	0	0	0	0.2	0.1	0.4	0.7	0.6	0.7	0.8	0.9	2	1.2	1.3	2	1.8	2.6	2.6	2.3	3.3	2.5	1.5	2	4	3.1	7.5	11	9.6	18.1
XZ009	申扎县	2019-12-11 14:00:00	0	0	0	0	0	0	0.2	0.1	0.4	0.7	0.6	0.7	0.8	0.9	2	1.2	1.3	2	1.8	2.6	2.6	2.3	3.3	2.5	1.5	2	3.9	3.1	7.5	10.9	9.6	18.1
XZ009	申扎县	2019-12-11 15:00:00	0	0	0	0	0	0	0.2	0.2	0.4	0.7	0.6	0.7	0.8	0.9	2	1.2	1.3	2	1.8	2.6	2.6	2.3	3.3	2.5	1.5	2	3.9	3.1	7.5	11	9.6	18.1
XZ009	申扎县	2019-12-11 16:00:00	0	0	0	0	0	0	0.2	0.2	0.4	0.7	0.6	0.7	0.8	0.9	2	1.2	1.3	2	1.8	2.6	2.6	2.3	3.3	2.5	1.5	2	3.9	3	7.5	11	9.7	18.1
XZ009	申扎县	2019-12-11 17:00:00	0	0.1	0	0	0	0	0.2	0.2	0.4	0.7	0.6	0.7	0.8	0.9	2	1.1	1.3	2	1.8	2.6	2.6	2.3	3.3	2.5	1.5	2	3.8	3	7.4	11	9.6	18.1
XZ009	申扎县	2019-12-11 18:00:00	0	0.1	0	0	0	0	0.2	0.2	0.4	0.7	0.6	0.7	0.8	0.9	2	1.2	1.3	2	1.7	2.6	2.6	2.3	3.3	2.4	1.5	1.9	3.8	3	7.4	11	9.6	18.1
XZ009	申扎县	2019-12-11 19:00:00	0	0.1	0	0	0	0	0.2	0.2	0.4	0.7	0.6	0.7	0.8	0.9	2	1.2	1.3	2	1.8	2.6	2.6	2.3	3.3	2.4	1.5	1.9	3.7	3	7.4	11	9.6	18.1
XZ009	申扎县	2019-12-11 20:00:00	0	0	0	0	0	0	0.2	0.2	0.4	0.7	0.6	0.7	0.9	0.9	2	1.2	1.3	2	1.8	2.6	2.6	2.3	3.3	2.4	1.5	1.9	3.7	3	7.4	11	9.6	18.1
XZ009	申扎县	2019-12-11 21:00:00	0	0	0	0	0	0	0.2	0.2	0.4	0.7	0.6	0.7	0.8	0.9	2	1.1	1.3	2	1.8	2.6	2.6	2.3	3.3	2.4	1.5	1.9	3.6	3	7.4	11	9.5	18
XZ009	申扎县	2019-12-11 22:00:00	0	0	0	0	0	0	0.2	0.2	0.4	0.7	0.6	0.7	0.8	0.9	2	1.2	1.3	2	1.7	2.6	2.6	2.3	3.3	2.4	1.5	1.9	3.6	2.9	7.4	11	9.6	18
XZ009	申扎县	2019-12-11 23:00:00	0	0	0	0	0	0	0.2	0.2	0.4	0.7	0.6	0.7	0.8	0.9	2	1.1	1.3	2	1.8	2.6	2.6	2.3	3.3	2.4	1.5	1.9	3.6	2.9	7.4	11	9.6	18
XZ009	申扎县	2019-12-12 00:00:00	0	0	0	0	0	0	0.2	0.2	0.4	0.7	0.6	0.7	0.8	0.9	2	1.2	1.3	2	1.8	2.6	2.6	2.3	3.3	2.4	1.5	1.9	3.5	2.9	7.4	11	9.6	18
XZ009	申扎县	2019-12-12 01:00:00	0	0	0	0	0	0	0.2	0.2	0.4	0.7	0.6	0.7	0.8	0.9	2	1.2	1.3	2	1.8	2.6	2.6	2.3	3.3	2.4	1.5	1.9	3.5	2.8	7.4	11	9.6	18
XZ009	申扎县	2019-12-12 02:00:00	0	0	0	0	0	0	0.2	0.1	0.4	0.7	0.6	0.7	0.8	0.9	2	1.2	1.3	2	1.7	2.6	2.6	2.3	3.3	2.4	1.5	1.9	3.5	2.8	7.3	10.9	9.6	18
XZ009	申扎县	2019-12-12 03:00:00	0	0	0	0	0	0	0.1	0.1	0.4	0.7	0.6	0.7	0.8	0.9	2	1.2	1.3	2	1.8	2.6	2.6	2.3	3.3	2.4	1.5	1.9	3.4	2.8	7.3	10.9	9.6	18
XZ009	申扎县	2019-12-12 04:00:00	0	0	0	0	0	0	0.1	0.1	0.4	0.6	0.6	0.7	0.8	0.9	2	1.2	1.3	2	1.7	2.6	2.6	2.3	3.3	2.4	1.4	1.8	3.4	2.8	7.3	10.9	9.6	18
XZ009	申扎县	2019-12-12 05:00:00	0	0	0	0	0	0	0.1	0.1	0.4	0.6	0.5	0.7	0.8	0.9	2	1.1	1.3	2	1.8	2.6	2.6	2.3	3.3	2.4	1.4	1.8	3.4	2.7	7.3	10.9	9.6	18
XZ009	申扎县	2019-12-12 06:00:00	0	0	0	0	0	0	0.1	0.1	0.4	0.6	0.5	0.7	0.8	0.9	1.9	1.1	1.3	2	1.8	2.6	2.6	2.3	3.3	2.4	1.4	1.8	3.3	2.7	7.3	10.9	9.5	18
XZ009	申扎县	2019-12-12 07:00:00	0	0	0	0	0	0	0.1	0.1	0.3	0.6	0.5	0.7	0.8	0.9	1.9	1.1	1.3	2	1.7	2.6	2.6	2.3	3.3	2.4	1.4	1.8	3.3	2.7	7.3	10.9	9.6	18
XZ009	申扎县	2019-12-12 08:00:00	0	0	0	0	0	0	0.1	0.1	0.3	0.6	0.5	0.7	0.8	0.9	1.9	1.1	1.3	2	1.7	2.6	2.6	2.3	3.3	2.4	1.4	1.8	3.3	2.7	7.2	10.9	9.6	17.9
XZ009	申扎县	2019-12-12 09:00:00	0	0	0	0	0	0	0.1	0.1	0.3	0.6	0.5	0.7	0.8	0.9	1.9	1.1	1.3	2	1.7	2.6	2.6	2.3	3.3	2.4	1.4	1.8	3.3	2.6	7.2	10.9	9.5	17.9
XZ009	申扎县	2019-12-12 10:00:00	0	0	0	0	0	0	0.1	0.1	0.3	0.6	0.5	0.6	0.8	0.9	1.9	1.1	1.3	2	1.7	2.6	2.6	2.3	3.2	2.4	1.4	1.8	3.2	2.6	7.2	10.9	9.5	17.9
XZ009	申扎县	2019-12-12 11:00:00	0	0	0	0	0	0	0.1	0	0.3	0.5	0.5	0.6	0.8	0.8	1.9	1.1	1.3	2	1.7	2.6	2.6	2.3	3.2	2.4	1.4	1.8	3.2	2.6	7.2	10.9	9.5	17.9
XZ009	申扎县	2019-12-12 12:00:00	0	0	0	0	0	0	0.1	0	0.3	0.5	0.5	0.6	0.8	0.8	1.9	1.1	1.3	2	1.7	2.5	2.5	2.2	3.2	2.4	1.4	1.8	3.2	2.6	7.2	10.9	9.5	17.9
XZ009	申扎县	2019-12-12 13:00:00	0	0	0	0	0	0	0.1	0	0.3	0.5	0.5	0.6	0.7	0.8	1.9	1.1	1.3	2	1.7	2.5	2.5	2.3	3.2	2.4	1.4	1.8	3.2	2.5	7.1	10.9	9.5	17.9
XZ009	申扎县	2019-12-12 14:00:00	0	0	0	0	0	0	0.1	0.1	0.3	0.5	0.5	0.6	0.7	0.8	1.9	1.1	1.2	1.9	1.7	2.5	2.5	2.2	3.2	2.3	1.4	1.8	3.2	2.5	7.1	10.9	9.5	17.9
XZ009	申扎县	2019-12-12 15:00:00	0	0.1	0	0	0	0	0.1	0.1	0.3	0.5	0.5	0.6	0.7	0.8	1.9	1.1	1.2	1.9	1.7	2.5	2.5	2.2	3.2	2.3	1.4	1.8	3.1	2.5	7.1	10.9	9.5	17.9
XZ009	申扎县	2019-12-12 16:00:00	0	0.1	0	0	0	0	0.1	0.1	0.3	0.6	0.5	0.6	0.7	0.8	1.9	1.1	1.2	1.9	1.7	2.5	2.5	2.2	3.2	2.3	1.4	1.8	3.1	2.5	7.1	10.9	9.5	17.9
XZ009	申扎县	2019-12-12 17:00:00	0	0.1	0	0	0	0	0.1	0.1	0.4	0.6	0.5	0.6	0.7	0.8	1.9	1	1.2	1.9	1.6	2.5	2.5	2.2	3.2	2.3	1.4	1.8	3.1	2.4	7.1	10.9	9.5	17.9
XZ009	申扎县	2019-12-12 18:00:00	0	0.1	0	0	0	0	0.2	0.1	0.4	0.6	0.5	0.6	0.7	0.8	1.9	1	1.2	1.9	1.6	2.5	2.5	2.2	3.1	2.3	1.4	1.8	3.1	2.4	7.1	10.9	9.5	17.9
XZ009	申扎县	2019-12-12 19:00:00	0	0.1	0	0	0	0	0.2	0.1	0.4	0.6	0.5	0.6	0.8	0.8	1.9	1.1	1.2	1.9	1.6	2.5	2.4	2.2	3.2	2.3	1.4	1.8	3	2.4	7	10.9	9.5	17.9
XZ009	申扎县	2019-12-12 20:00:00	0	0.1	0	0	0	0	0.2	0.2	0.4	0.6	0.5	0.7	0.8	0.8	1.9	1.1	1.2	1.9	1.6	2.4	2.4	2.2	3.1	2.3	1.4	1.7	3	2.4	7	10.8	9.5	17.9
XZ009	申扎县	2019-12-12 21:00:00	0	0.1	0	0	0	0	0.2	0.2	0.4	0.6	0.5	0.7	0.8	0.8	1.9	1.1	1.2	1.9	1.6	2.4	2.4	2.1	3.1	2.3	1.3	1.7	3	2.3	7	10.8	9.5	17.9
XZ009	申扎县	2019-12-12 22:00:00	0	0	0	0	0	0	0.2	0.2	0.4	0.7	0.5	0.7	0.8	0.8	1.9	1	1.2	1.9	1.6	2.4	2.4	2.1	3.1	2.3	1.3	1.7	3	2.3	7	10.8	9.5	17.9
XZ009	申扎县	2019-12-12 23:00:00	0	0	0	0	0	0	0.2	0.2	0.4	0.7	0.5	0.7	0.8	0.8	1.9	1.1	1.2	1.9	1.6	2.4	2.4	2.1	3.1	2.3	1.3	1.7	3	2.3	6.9	10.8	9.4	17.9
XZ009	申扎县	2019-12-13 00:00:00	0	0	0	0	0	0	0.2	0.2	0.4	0.7	0.6	0.7	0.8	0.8	1.9	1.1	1.2	1.9	1.6	2.4	2.4	2.1	3.1	2.2	1.3	1.7	2.9	2.3	6.9	10.8	9.5	17.8
XZ009	申扎县	2019-12-13 01:00:00	0	0	0	0	0	0	0.2	0.2	0.4	0.7	0.5	0.7	0.8	0.8	1.9	1.1	1.2	1.9	1.6	2.4	2.4	2.1	3.1	2.2	1.3	1.7	2.9	2.2	6.9	10.8	9.5	17.8
XZ009	申扎县	2019-12-13 02:00:00	0	0	0	0	0	0	0.2	0.2	0.4	0.7	0.5	0.7	0.8	0.9	1.9	1.1	1.2	1.9	1.6	2.4	2.4	2.1	3.1	2.2	1.3	1.7	2.9	2.2	6.9	10.8	9.5	17.8
XZ009	申扎县	2019-12-13 03:00:00	0	0	0	0	0	0	0.2	0.2	0.4	0.7	0.6	0.7	0.8	0.9	1.9	1.1	1.2	1.9	1.6	2.4	2.4	2.1	3.1	2.2	1.3	1.7	2.9	2.2	6.8	10.8	9.4	17.8
XZ009	申扎县	2019-12-13 04:00:00	0	0	0	0	0	0	0.2	0.1	0.4	0.6	0.5	0.7	0.8	0.9	1.9	1.1	1.2	1.9	1.6	2.4	2.4	2.1	3.1	2.2	1.3	1.7	2.9	2.2	6.8	10.8	9.4	17.8
XZ009	申扎县	2019-12-13 05:00:00	0	0	0	0	0	0	0.2	0.1	0.4	0.6	0.5	0.7	0.8	0.9	1.9	1.1	1.2	1.9	1.6	2.4	2.4	2.1	3.1	2.2	1.3	1.7	2.8	2.1	6.8	10.8	9.4	17.8
XZ009	申扎县	2019-12-13 06:00:00	0	0	0	0	0	0	0.1	0.1	0.4	0.6	0.5	0.7	0.8	0.8	1.9	1.1	1.2	1.9	1.6	2.5	2.4	2.1	3.1	2.2	1.3	1.7	2.8	2.1	6.8	10.8	9.4	17.8
XZ009	申扎县	2019-12-13 07:00:00	0	0	0	0	0	0	0.1	0.1	0.4	0.6	0.5	0.7	0.8	0.9	1.9	1.1	1.2	1.9	1.6	2.4	2.4	2.1	3.1	2.2	1.3	1.7	2.8	2.1	6.7	10.8	9.4	17.8
XZ009	申扎县	2019-12-13 08:00:00	0	0	0	0	0	0	0.1	0.1	0.4	0.6	0.5	0.7	0.8	0.8	1.9	1.1	1.2	1.9	1.6	2.4	2.4	2.1	3.1	2.2	1.3	1.7	2.8	2	6.7	10.7	9.4	17.8
XZ009	申扎县	2019-12-13 09:00:00	0	0	0	0	0	0	0.1	0.1	0.4	0.6	0.5	0.7	0.8	0.8	1.9	1.1	1.2	1.9	1.6	2.4	2.4	2.1	3.1	2.2	1.3	1.7	2.8	2	6.6	10.7	9.4	17.7
XZ009	申扎县	2019-12-13 10:00:00	0	0	0	0	0	0	0.1	0.1	0.4	0.6	0.5	0.7	0.8	0.8	1.9	1.1	1.2	1.9	1.6	2.4	2.4	2.1	3	2.2	1.3	1.7	2.8	2	6.6	10.7	9.4	17.7
XZ009	申扎县	2019-12-13 11:00:00	0	0	0	0	0	0	0.1	0.1	0.4	0.6	0.5	0.7	0.8	0.8	1.9	1.1	1.2	1.9	1.6	2.4	2.4	2.1	3.1	2.2	1.3	1.7	2.7	2	6.6	10.7	9.4	17.7
XZ009	申扎县	2019-12-13 12:00:00	0	0	0	0	0	0	0.1	0.1	0.4	0.6	0.5	0.6	0.8	0.8	1.9	1.1	1.2	1.9	1.6	2.4	2.4	2.1	3.1	2.2	1.3	1.7	2.7	2	6.6	10.7	9.4	17.7
XZ009	申扎县	2019-12-13 13:00:00	0	0	0	0	0	0	0.1	0.1	0.4	0.6	0.5	0.7	0.8	0.8	1.9	1.1	1.2	1.9	1.6	2.4	2.4	2.1	3	2.2	1.3	1.7	2.7	2	6.5	10.7	9.4	17.7
XZ009	申扎县	2019-12-13 14:00:00	0	0.1	0	0	0	0	0.1	0.1	0.4	0.6	0.5	0.6	0.8	0.8	1.9	1.1	1.2	1.9	1.6	2.4	2.4	2.1	3	2.2	1.3	1.6	2.7	1.9	6.5	10.7	9.4	17.7
XZ009	申扎县	2019-12-13 15:00:00	0	0.1	0	0	0	0	0.1	0.1	0.4	0.6	0.5	0.6	0.7	0.8	1.9	1.1	1.2	1.9	1.6	2.4	2.4	2.1	3	2.2	1.3	1.6	2.7	1.9	6.4	10.7	9.3	17.7
XZ009	申扎县	2019-12-13 16:00:00	0	0.2	0	0	0	0	0.2	0.1	0.4	0.6	0.5	0.6	0.8	0.8	1.9	1.1	1.2	1.9	1.6	2.4	2.4	2.1	3	2.2	1.3	1.6	2.7	1.9	6.4	10.6	9.3	17.7
XZ009	申扎县	2019-12-13 17:00:00	0	0.2	0	0	0.1	0	0.2	0.2	0.4	0.6	0.5	0.7	0.8	0.8	1.9	1.1	1.2	1.9	1.6	2.4	2.4	2.1	3	2.2	1.3	1.6	2.7	1.8	6.4	10.6	9.3	17.7
XZ009	申扎县	2019-12-13 18:00:00	0	0.2	0	0	0.1	0	0.2	0.2	0.4	0.6	0.5	0.7	0.8	0.8	1.9	1.1	1.2	1.9	1.6	2.4	2.4	2.1	3	2.2	1.3	1.6	2.7	1.8	6.4	10.6	9.3	17.7
XZ009	申扎县	2019-12-13 19:00:00	0	0.1	0	0	0.1	0	0.2	0.2	0.4	0.7	0.5	0.7	0.8	0.8	1.9	1.1	1.2	1.9	1.6	2.4	2.4	2.1	3	2.2	1.3	1.6	2.6	1.8	6.3	10.6	9.3	17.7
XZ009	申扎县	2019-12-13 20:00:00	0	0.1	0	0	0.1	0	0.2	0.2	0.5	0.7	0.6	0.7	0.8	0.8	1.9	1.1	1.2	1.9	1.6	2.4	2.4	2.1	3	2.2	1.3	1.6	2.6	1.8	6.3	10.6	9.3	17.6
XZ009	申扎县	2019-12-13 21:00:00	0	0.1	0	0	0.1	0	0.2	0.2	0.4	0.7	0.6	0.7	0.8	0.8	1.9	1.1	1.2	1.9	1.6	2.4	2.4	2.1	3	2.2	1.3	1.6	2.6	1.8	6.2	10.5	9.3	17.6
XZ009	申扎县	2019-12-13 22:00:00	0	0.1	0	0	0.1	0	0.2	0.2	0.4	0.7	0.6	0.7	0.8	0.9	1.9	1.1	1.2	1.9	1.6	2.4	2.4	2.1	3	2.2	1.3	1.6	2.6	1.7	6.2	10.5	9.3	17.6
XZ009	申扎县	2019-12-14 02:00:00	0	0	0	0	0	0	0.2	0.2	0.4	0.7	0.6	0.7	0.8	0.9	1.9	1.1	1.2	1.9	1.6	2.4	2.4	2.1	3	2.1	1.2	1.6	2.6	1.6	5.9	10.5	9.2	17.5
XZ009	申扎县	2019-12-14 03:00:00	0	0	0	0	0	0	0.2	0.2	0.4	0.7	0.6	0.7	0.8	0.9	1.9	1.1	1.2	1.9	1.6	2.4	2.4	2.1	3	2.1	1.2	1.6	2.6	1.6	5.9	10.5	9.2	17.5
XZ009	申扎县	2019-12-14 04:00:00	0	0	0	0	0	0	0.2	0.2	0.4	0.7	0.6	0.7	0.8	0.9	1.9	1.1	1.2	1.9	1.6	2.4	2.4	2.1	3	2.1	1.2	1.6	2.6	1.6	5.8	10.4	9.2	17.5
XZ009	申扎县	2019-12-14 05:00:00	0	0	0	0	0	0	0.2	0.2	0.4	0.7	0.6	0.7	0.8	0.9	1.9	1.1	1.2	1.9	1.6	2.4	2.4	2.1	3	2.1	1.2	1.6	2.6	1.6	5.7	10.4	9.2	17.5
XZ009	申扎县	2019-12-14 06:00:00	0	0	0	0	0	0	0.2	0.2	0.4	0.7	0.6	0.7	0.8	0.9	1.9	1.1	1.2	1.9	1.6	2.4	2.4	2.1	3	2.1	1.2	1.6	2.5	1.6	5.6	10.4	9.2	17.5
XZ009	申扎县	2019-12-14 07:00:00	0	0	0	0	0	0	0.2	0.2	0.4	0.7	0.6	0.7	0.8	0.9	1.9	1.1	1.2	1.9	1.6	2.4	2.4	2.1	3	2.2	1.2	1.6	2.5	1.6	5.6	10.3	9.1	17.4
XZ009	申扎县	2019-12-14 08:00:00	0	0	0	0	0	0	0.2	0.2	0.4	0.7	0.6	0.7	0.8	0.9	1.9	1.1	1.2	1.9	1.6	2.4	2.4	2.1	3	2.1	1.2	1.6	2.5	1.5	5.5	10.3	9.1	17.4
XZ009	申扎县	2019-12-14 09:00:00	0	0	0	0	0	0	0.2	0.1	0.4	0.7	0.6	0.7	0.8	0.9	1.9	1.1	1.2	1.9	1.6	2.4	2.4	2.1	3	2.1	1.2	1.6	2.5	1.5	5.4	10.3	9.1	17.4
XZ009	申扎县	2019-12-14 10:00:00	0	0	0	0	0	0	0.2	0.1	0.4	0.6	0.6	0.7	0.8	0.9	1.9	1.1	1.2	1.9	1.6	2.4	2.4	2.1	3	2.1	1.3	1.6	2.5	1.5	5.4	10.2	9.1	17.4
XZ009	申扎县	2019-12-14 11:00:00	0	0	0	0	0	0	0.1	0.1	0.4	0.6	0.5	0.7	0.8	0.9	1.9	1.1	1.2	1.9	1.6	2.4	2.4	2.1	3	2.1	1.2	1.6	2.5	1.5	5.3	10.2	9.1	17.4
XZ009	申扎县	2019-12-14 12:00:00	0	0	0	0	0	0	0.1	0.1	0.4	0.6	0.5	0.7	0.8	0.9	1.9	1.1	1.2	1.9	1.6	2.4	2.4	2.1	3	2.1	1.2	1.6	2.5	1.5	5.2	10.2	9	17.3
XZ009	申扎县	2019-12-14 13:00:00	0	0	0	0	0	0	0.1	0.1	0.4	0.6	0.5	0.7	0.8	0.9	1.9	1.1	1.2	1.9	1.6	2.4	2.4	2.1	3	2.1	1.2	1.6	2.5	1.5	5.2	10.1	9	17.3
XZ009	申扎县	2019-12-14 14:00:00	0	0.1	0	0	0	0	0.2	0.1	0.4	0.6	0.5	0.7	0.8	0.8	1.9	1.1	1.2	1.9	1.6	2.4	2.4	2.1	3	2.1	1.2	1.6	2.5	1.5	5.1	10.1	9	17.3
XZ009	申扎县	2019-12-14 15:00:00	0	0.1	0	0	0	0	0.2	0.2	0.4	0.6	0.5	0.7	0.8	0.8	1.9	1.1	1.2	1.9	1.6	2.4	2.4	2.1	3	2.1	1.2	1.6	2.5	1.5	5.1	10	9	17.3
XZ009	申扎县	2019-12-14 16:00:00	0	0.1	0	0	0	0	0.2	0.2	0.4	0.7	0.5	0.7	0.8	0.8	1.9	1.1	1.2	1.9	1.6	2.4	2.4	2.1	3	2.2	1.2	1.6	2.5	1.5	5	10	9	17.3
XZ009	申扎县	2019-12-14 17:00:00	0	0.1	0	0	0.1	0	0.2	0.2	0.4	0.7	0.6	0.7	0.8	0.8	1.9	1.1	1.2	1.9	1.6	2.4	2.4	2.1	3	2.1	1.2	1.6	2.5	1.5	5	10	8.9	17.3
XZ009	申扎县	2019-12-14 18:00:00	0	0.1	0	0	0.1	0	0.2	0.2	0.4	0.7	0.6	0.7	0.8	0.9	1.9	1.1	1.2	1.9	1.6	2.4	2.4	2.1	3	2.1	1.2	1.6	2.5	1.5	4.9	9.9	8.9	17.2
XZ009	申扎县	2019-12-14 19:00:00	0	0.1	0	0	0.1	0	0.2	0.2	0.4	0.7	0.6	0.7	0.8	0.9	1.9	1.1	1.2	1.9	1.6	2.4	2.4	2.1	3	2.1	1.2	1.6	2.5	1.5	4.8	9.9	8.9	17.2
XZ009	申扎县	2019-12-14 20:00:00	0	0	0	0	0.1	0	0.2	0.2	0.4	0.7	0.6	0.7	0.8	0.9	1.9	1.1	1.2	1.9	1.6	2.4	2.4	2.1	3	2.1	1.2	1.6	2.5	1.5	4.8	9.9	8.9	17.2
XZ009	申扎县	2019-12-14 21:00:00	0	0	0	0	0	0	0.2	0.2	0.4	0.7	0.6	0.7	0.8	0.9	1.9	1.1	1.2	1.9	1.6	2.4	2.4	2.1	3	2.1	1.2	1.6	2.5	1.5	4.7	9.8	8.8	17.2
XZ009	申扎县	2019-12-14 22:00:00	0	0	0	0	0	0	0.2	0.2	0.4	0.7	0.6	0.7	0.8	0.9	1.9	1.1	1.2	1.9	1.6	2.4	2.4	2.1	3	2.1	1.2	1.6	2.5	1.5	4.7	9.8	8.8	17.1
XZ009	申扎县	2019-12-14 23:00:00	0	0	0	0	0	0	0.2	0.2	0.4	0.7	0.6	0.7	0.8	0.9	1.9	1.1	1.2	1.9	1.6	2.4	2.4	2.1	3	2.1	1.2	1.6	2.5	1.4	4.6	9.7	8.8	17.1
XZ009	申扎县	2019-12-15 00:00:00	0	0	0	0	0	0	0.2	0.2	0.4	0.7	0.6	0.7	0.8	0.9	1.9	1.1	1.2	1.9	1.6	2.4	2.4	2.1	3	2.1	1.2	1.6	2.5	1.4	4.6	9.7	8.7	17.1
XZ009	申扎县	2019-12-15 01:00:00	0	0	0	0	0	0	0.2	0.2	0.4	0.7	0.6	0.7	0.8	0.9	1.9	1.1	1.2	1.9	1.6	2.4	2.4	2.1	3	2.1	1.3	1.6	2.4	1.4	4.6	9.6	8.7	17
XZ009	申扎县	2019-12-15 02:00:00	0	0	0	0	0	0	0.2	0.2	0.4	0.7	0.6	0.7	0.8	0.9	1.9	1.1	1.2	1.9	1.6	2.4	2.4	2.1	3	2.1	1.2	1.6	2.4	1.4	4.6	9.6	8.7	17
XZ009	申扎县	2019-12-15 03:00:00	0	0	0	0	0	0	0.2	0.2	0.4	0.7	0.6	0.7	0.8	0.9	1.9	1.1	1.2	1.9	1.6	2.4	2.4	2.1	3	2.1	1.2	1.6	2.4	1.4	4.5	9.6	8.7	17
XZ009	申扎县	2019-12-15 04:00:00	0	0	0	0	0	0	0.2	0.2	0.4	0.7	0.6	0.7	0.8	0.9	1.9	1.1	1.2	1.9	1.6	2.4	2.4	2.1	3	2.1	1.2	1.6	2.4	1.4	4.5	9.5	8.6	16.9
XZ009	申扎县	2019-12-15 05:00:00	0	0	0	0	0	0	0.2	0.2	0.4	0.7	0.6	0.7	0.8	0.9	1.9	1.1	1.2	1.9	1.6	2.4	2.4	2.1	3	2.1	1.2	1.6	2.4	1.4	4.5	9.4	8.6	16.9
XZ009	申扎县	2019-12-15 06:00:00	0	0	0	0	0	0	0.2	0.2	0.4	0.7	0.6	0.7	0.8	0.9	1.9	1.1	1.2	1.9	1.6	2.4	2.4	2.1	3	2.1	1.2	1.6	2.4	1.4	4.4	9.4	8.6	16.9
XZ009	申扎县	2019-12-15 07:00:00	0	0	0	0	0	0	0.2	0.1	0.4	0.7	0.6	0.7	0.8	0.9	1.9	1.1	1.2	1.9	1.6	2.4	2.4	2.1	3	2.1	1.2	1.6	2.4	1.4	4.4	9.3	8.5	16.8
XZ009	申扎县	2019-12-15 08:00:00	0	0	0	0	0	0	0.1	0.1	0.4	0.6	0.5	0.7	0.8	0.9	1.9	1.1	1.2	1.9	1.6	2.4	2.4	2.1	3	2.1	1.2	1.6	2.4	1.4	4.4	9.3	8.5	16.8
XZ009	申扎县	2019-12-15 09:00:00	0	0	0	0	0	0	0.1	0.1	0.4	0.6	0.5	0.7	0.8	0.9	1.9	1.1	1.2	1.9	1.6	2.4	2.4	2.1	3	2.1	1.2	1.6	2.4	1.4	4.4	9.2	8.5	16.7
XZ009	申扎县	2019-12-15 10:00:00	0	0	0	0	0	0	0.1	0.1	0.4	0.6	0.5	0.7	0.8	0.9	1.9	1.1	1.2	1.9	1.6	2.4	2.4	2.1	3	2.1	1.2	1.6	2.4	1.4	4.4	9.2	8.4	16.7
XZ009	申扎县	2019-12-15 11:00:00	0	0	0	0	0	0	0.1	0.1	0.4	0.6	0.5	0.7	0.8	0.8	1.9	1.1	1.2	1.9	1.6	2.4	2.4	2.1	3	2.1	1.2	1.6	2.4	1.4	4.4	9.1	8.4	16.7
XZ009	申扎县	2019-12-15 12:00:00	0	0	0	0	0	0	0.1	0.1	0.3	0.6	0.5	0.7	0.8	0.8	1.9	1.1	1.2	1.9	1.6	2.4	2.4	2.1	3	2.1	1.2	1.6	2.4	1.4	4.4	9.1	8.4	16.6
XZ009	申扎县	2019-12-15 13:00:00	0	0	0	0	0	0	0.1	0.1	0.3	0.6	0.5	0.7	0.8	0.8	1.9	1.1	1.2	1.9	1.6	2.4	2.3	2.1	3	2.1	1.2	1.6	2.4	1.4	4.3	9.1	8.3	16.6
XZ009	申扎县	2019-12-15 14:00:00	0	0	0	0	0	0	0.1	0.1	0.4	0.6	0.5	0.7	0.8	0.8	1.9	1.1	1.2	1.9	1.6	2.4	2.3	2.1	3	2.1	1.2	1.6	2.4	1.4	4.4	9	8.3	16.6
XZ009	申扎县	2019-12-15 15:00:00	0	0.1	0	0	0	0	0.1	0.1	0.4	0.6	0.5	0.7	0.8	0.8	1.9	1.1	1.2	1.9	1.6	2.4	2.3	2.1	3	2.1	1.2	1.6	2.4	1.4	4.3	8.9	8.3	16.5
XZ009	申扎县	2019-12-15 16:00:00	0	0.1	0	0	0	0	0.1	0.1	0.4	0.6	0.5	0.7	0.8	0.8	1.9	1.1	1.2	1.9	1.6	2.4	2.3	2.1	3	2.1	1.2	1.6	2.4	1.4	4.3	8.9	8.2	16.5
XZ009	申扎县	2019-12-15 17:00:00	0	0.1	0	0	0	0	0.2	0.1	0.4	0.6	0.5	0.7	0.8	0.8	1.9	1.1	1.2	1.8	1.6	2.4	2.3	2.1	3	2.1	1.2	1.6	2.4	1.4	4.3	8.8	8.2	16.5
XZ009	申扎县	2019-12-15 18:00:00	0	0.1	0	0	0	0	0.2	0.2	0.4	0.6	0.5	0.7	0.8	0.8	1.9	1.1	1.2	1.8	1.6	2.3	2.3	2	3	2.1	1.2	1.6	2.4	1.4	4.3	8.8	8.1	16.4
XZ009	申扎县	2019-12-15 19:00:00	0	0	0	0	0	0	0.2	0.2	0.4	0.6	0.5	0.7	0.8	0.8	1.9	1.1	1.2	1.8	1.6	2.4	2.3	2	2.9	2.1	1.2	1.6	2.4	1.3	4.3	8.7	8.1	16.4
XZ009	申扎县	2019-12-15 20:00:00	0	0	0	0	0	0	0.2	0.2	0.4	0.7	0.5	0.7	0.8	0.8	1.9	1.1	1.2	1.8	1.6	2.4	2.3	2	2.9	2.1	1.2	1.6	2.4	1.3	4.3	8.7	8.1	16.3
XZ009	申扎县	2019-12-15 21:00:00	0	0	0	0	0	0	0.2	0.2	0.4	0.7	0.6	0.7	0.8	0.8	1.9	1.1	1.2	1.8	1.6	2.4	2.3	2	2.9	2.1	1.2	1.6	2.4	1.3	4.3	8.6	8	16.3
XZ009	申扎县	2019-12-15 22:00:00	0	0	0	0	0	0	0.2	0.2	0.4	0.7	0.6	0.7	0.8	0.8	1.9	1.1	1.2	1.8	1.6	2.3	2.3	2	2.9	2.1	1.2	1.6	2.4	1.3	4.3	8.5	8	16.3
XZ009	申扎县	2019-12-15 23:00:00	0	0	0	0	0	0	0.2	0.2	0.4	0.7	0.6	0.7	0.8	0.8	1.9	1.1	1.2	1.8	1.6	2.4	2.3	2	2.9	2.1	1.2	1.6	2.4	1.3	4.2	8.5	8	16.2
XZ009	申扎县	2019-12-16 00:00:00	0	0	0	0	0	0	0.2	0.2	0.4	0.7	0.6	0.7	0.8	0.8	1.9	1.1	1.2	1.9	1.6	2.3	2.3	2	2.9	2.1	1.2	1.6	2.4	1.3	4.2	8.4	7.9	16.2
XZ009	申扎县	2019-12-16 01:00:00	0	0	0	0	0	0	0.2	0.2	0.4	0.7	0.6	0.7	0.8	0.8	1.9	1.1	1.2	1.9	1.6	2.4	2.3	2	2.9	2.1	1.2	1.6	2.3	1.3	4.2	8.4	7.9	16.1
XZ009	申扎县	2019-12-16 02:00:00	0	0	0	0	0	0	0.2	0.2	0.4	0.7	0.6	0.7	0.8	0.9	1.9	1.1	1.2	1.8	1.6	2.4	2.3	2	2.9	2.1	1.2	1.5	2.3	1.3	4.2	8.3	7.8	16.1
XZ009	申扎县	2019-12-16 03:00:00	0	0	0	0	0	0	0.2	0.2	0.4	0.7	0.5	0.7	0.8	0.8	1.9	1.1	1.2	1.9	1.6	2.4	2.3	2	2.9	2.1	1.2	1.5	2.3	1.3	4.2	8.2	7.8	16
XZ009	申扎县	2019-12-16 04:00:00	0	0	0	0	0	0	0.2	0.1	0.4	0.7	0.5	0.7	0.8	0.8	1.9	1.1	1.2	1.9	1.6	2.4	2.3	2	2.9	2.1	1.2	1.5	2.3	1.3	4.2	8.2	7.8	16
XZ009	申扎县	2019-12-16 05:00:00	0	0	0	0	0	0	0.1	0.1	0.4	0.6	0.5	0.7	0.8	0.8	1.9	1.1	1.2	1.8	1.6	2.4	2.3	2	2.9	2.1	1.2	1.5	2.3	1.3	4.2	8.1	7.7	15.9
XZ009	申扎县	2019-12-16 06:00:00	0	0	0	0	0	0	0.1	0.1	0.4	0.6	0.5	0.7	0.8	0.8	1.9	1.1	1.2	1.8	1.6	2.3	2.3	2	2.9	2.1	1.2	1.5	2.3	1.3	4.2	8	7.7	15.9
XZ009	申扎县	2019-12-16 07:00:00	0	0	0	0	0	0	0.1	0.1	0.4	0.6	0.5	0.7	0.8	0.8	1.9	1.1	1.2	1.8	1.6	2.4	2.3	2	2.9	2.1	1.2	1.5	2.3	1.3	4.2	7.9	7.6	15.8
XZ009	申扎县	2019-12-16 08:00:00	0	0	0	0	0	0	0.1	0.1	0.4	0.6	0.5	0.7	0.8	0.8	1.9	1.1	1.2	1.8	1.6	2.4	2.3	2	2.9	2.1	1.2	1.5	2.3	1.3	4.2	7.9	7.6	15.8
XZ009	申扎县	2019-12-16 09:00:00	0	0	0	0	0	0	0.1	0.1	0.3	0.6	0.5	0.7	0.8	0.8	1.9	1.1	1.2	1.8	1.6	2.4	2.3	2	2.9	2.1	1.2	1.5	2.3	1.2	4.1	7.8	7.5	15.7
XZ009	申扎县	2019-12-16 10:00:00	0	0	0	0	0	0	0.1	0.1	0.3	0.6	0.5	0.6	0.8	0.8	1.9	1	1.2	1.9	1.6	2.3	2.3	2	2.9	2.1	1.2	1.5	2.3	1.2	4.1	7.7	7.5	15.7
XZ009	申扎县	2019-12-16 11:00:00	0	0	0	0	0	0	0.1	0.1	0.3	0.6	0.5	0.6	0.7	0.8	1.9	1.1	1.2	1.8	1.6	2.3	2.3	2	2.9	2.1	1.2	1.5	2.3	1.2	4.1	7.6	7.4	15.6
XZ009	申扎县	2019-12-16 12:00:00	0	0	0	0	0	0	0.1	0	0.3	0.5	0.5	0.6	0.7	0.8	1.8	1	1.2	1.8	1.6	2.3	2.3	2	2.9	2.1	1.2	1.5	2.3	1.2	4.1	7.6	7.4	15.6
XZ009	申扎县	2019-12-16 13:00:00	0	0	0	0	0	0	0.1	0	0.3	0.5	0.5	0.6	0.7	0.8	1.8	1	1.2	1.8	1.6	2.3	2.3	2	2.9	2.1	1.2	1.5	2.3	1.2	4.1	7.5	7.3	15.5
XZ009	申扎县	2019-12-16 14:00:00	0	0	0	0	0	0	0.1	0.1	0.3	0.5	0.5	0.6	0.7	0.8	1.8	1	1.2	1.8	1.5	2.3	2.3	2	2.9	2	1.2	1.5	2.3	1.2	4.1	7.4	7.3	15.5
XZ009	申扎县	2019-12-16 15:00:00	0	0	0	0	0	0	0.1	0.1	0.3	0.5	0.5	0.6	0.7	0.8	1.8	1	1.2	1.8	1.5	2.3	2.2	2	2.9	2	1.2	1.5	2.3	1.2	4.1	7.4	7.2	15.5
XZ009	申扎县	2019-12-16 16:00:00	0	0	0	0	0	0	0.1	0.1	0.3	0.5	0.5	0.6	0.7	0.8	1.8	1	1.1	1.8	1.5	2.3	2.2	2	2.9	2	1.2	1.5	2.3	1.2	4.1	7.3	7.2	15.4
XZ009	申扎县	2019-12-16 17:00:00	0	0	0	0	0	0	0.1	0.1	0.3	0.5	0.5	0.6	0.7	0.8	1.8	1	1.1	1.8	1.5	2.3	2.2	2	2.8	2.1	1.2	1.5	2.3	1.2	4.1	7.2	7.1	15.3
XZ009	申扎县	2019-12-16 18:00:00	0	0	0	0	0	0	0.1	0.1	0.3	0.6	0.5	0.6	0.7	0.8	1.8	1	1.1	1.8	1.5	2.3	2.2	1.9	2.8	2	1.2	1.5	2.3	1.2	4.1	7.1	7.1	15.3
XZ009	申扎县	2019-12-16 19:00:00	0	0	0	0	0	0	0.1	0.1	0.4	0.6	0.5	0.6	0.7	0.8	1.8	1	1.1	1.7	1.5	2.3	2.2	1.9	2.8	2	1.2	1.5	2.2	1.2	4.1	7.1	7	15.2
XZ009	申扎县	2019-12-16 20:00:00	0	0	0	0	0	0	0.2	0.1	0.4	0.6	0.5	0.6	0.7	0.8	1.8	1	1.1	1.7	1.5	2.3	2.2	1.9	2.8	2	1.2	1.5	2.3	1.2	4.1	7	7	15.2
XZ009	申扎县	2019-12-16 21:00:00	0	0	0	0	0	0	0.1	0.1	0.4	0.6	0.5	0.6	0.7	0.8	1.8	1	1.1	1.7	1.5	2.2	2.2	1.9	2.8	2	1.2	1.5	2.3	1.2	4.1	7	7	15.1
XZ009	申扎县	2019-12-16 22:00:00	0	0	0	0	0	0	0.1	0.1	0.4	0.6	0.5	0.6	0.7	0.8	1.8	1	1.1	1.7	1.5	2.2	2.2	1.9	2.8	2	1.2	1.5	2.2	1.2	4.1	6.9	6.9	15.1
XZ009	申扎县	2019-12-16 23:00:00	0	0	0	0	0	0	0.1	0.1	0.4	0.6	0.5	0.6	0.7	0.8	1.8	1	1.1	1.7	1.5	2.2	2.2	1.9	2.8	2	1.1	1.5	2.2	1.2	4.1	6.8	6.9	15
XZ009	申扎县	2019-12-17 00:00:00	0	0	0	0	0	0	0.1	0.1	0.4	0.6	0.5	0.6	0.7	0.8	1.8	1	1.1	1.7	1.5	2.2	2.2	1.9	2.8	2	1.1	1.5	2.2	1.2	4.1	6.7	6.8	15
XZ009	申扎县	2019-12-17 01:00:00	0	0	0	0	0	0	0.1	0.1	0.3	0.6	0.5	0.6	0.7	0.8	1.8	1	1.1	1.7	1.5	2.2	2.2	1.9	2.8	2	1.1	1.4	2.2	1.2	4.1	6.7	6.7	14.9
XZ009	申扎县	2019-12-17 02:00:00	0	0	0	0	0	0	0.1	0.1	0.3	0.6	0.5	0.6	0.7	0.8	1.8	1	1.1	1.7	1.5	2.2	2.2	1.9	2.8	2	1.1	1.5	2.2	1.2	4.1	6.6	6.6	14.9
XZ009	申扎县	2019-12-17 03:00:00	0	0	0	0	0	0	0.1	0.1	0.3	0.6	0.5	0.6	0.7	0.8	1.8	1	1.1	1.7	1.5	2.2	2.2	1.9	2.8	2	1.1	1.4	2.2	1.1	4	6.5	6.5	14.8
XZ009	申扎县	2019-12-17 04:00:00	0	0	0	0	0	0	0.1	0	0.3	0.5	0.5	0.6	0.7	0.8	1.8	1	1.1	1.7	1.5	2.2	2.1	1.9	2.7	2	1.1	1.4	2.2	1.2	4	6.5	6.5	14.8
XZ009	申扎县	2019-12-17 05:00:00	0	0	0	0	0	0	0.1	0	0.3	0.5	0.5	0.6	0.7	0.8	1.8	1	1.1	1.7	1.5	2.2	2.2	1.9	2.7	2	1.1	1.4	2.2	1.1	4	6.4	6.5	14.7
XZ009	申扎县	2019-12-17 06:00:00	0	0	0	0	0	0	0.1	0	0.3	0.5	0.4	0.6	0.7	0.8	1.8	1	1.1	1.7	1.5	2.2	2.1	1.9	2.7	2	1.1	1.4	2.2	1.1	4	6.4	6.4	14.7
XZ009	申扎县	2019-12-17 07:00:00	0	0	0	0	0	0	0.1	0	0.3	0.5	0.4	0.6	0.7	0.8	1.8	1	1.1	1.7	1.5	2.2	2.2	1.9	2.7	2	1.1	1.4	2.2	1.1	4	6.3	6.4	14.6
XZ009	申扎县	2019-12-17 08:00:00	0	0	0	0	0	0	0	0	0.3	0.5	0.4	0.6	0.7	0.7	1.7	0.9	1.1	1.7	1.5	2.2	2.1	1.8	2.7	2	1.1	1.4	2.2	1.1	4	6.3	6.3	14.6
XZ009	申扎县	2019-12-17 09:00:00	0	0	0	0	0	0	0	0	0.2	0.4	0.4	0.6	0.6	0.7	1.7	0.9	1.1	1.6	1.4	2.2	2.1	1.8	2.7	1.9	1.1	1.4	2.2	1.1	4	6.2	6.2	14.5
XZ009	申扎县	2019-12-17 10:00:00	0	0	0	0	0	0	0	0	0.2	0.4	0.4	0.5	0.6	0.7	1.7	0.9	1.1	1.7	1.4	2.1	2.1	1.8	2.7	1.9	1.1	1.4	2.1	1.1	4	6.2	6.2	14.5
XZ009	申扎县	2019-12-17 11:00:00	0	0	0	0	0	0	0	0	0.2	0.4	0.4	0.5	0.6	0.7	1.7	0.9	1.1	1.6	1.4	2.1	2.1	1.8	2.7	1.9	1.1	1.4	2.1	1.1	4	6.1	6.1	14.4
XZ009	申扎县	2019-12-17 12:00:00	0	0	0	0	0	0	0	0	0.2	0.4	0.4	0.5	0.6	0.7	1.7	0.9	1	1.6	1.4	2.1	2.1	1.8	2.7	1.9	1.1	1.4	2.1	1.1	4	6.1	6	14.4
XZ009	申扎县	2019-12-17 13:00:00	0	0	0	0	0	0	0	0	0.2	0.4	0.4	0.5	0.6	0.7	1.7	0.9	1	1.6	1.4	2.1	2.1	1.8	2.7	1.9	1.1	1.4	2.1	1.1	3.9	6.1	6	14.3
XZ009	申扎县	2019-12-17 14:00:00	0	0	0	0	0	0	0	0	0.2	0.4	0.4	0.5	0.6	0.7	1.6	0.9	1	1.6	1.4	2.1	2.1	1.8	2.7	1.9	1.1	1.4	2.1	1.1	3.9	6	5.9	14.3
XZ009	申扎县	2019-12-17 15:00:00	0	0	0	0	0	0	0	0	0.2	0.4	0.4	0.5	0.6	0.6	1.6	0.9	1	1.6	1.4	2.1	2	1.8	2.6	1.9	1.1	1.4	2.1	1.1	3.9	6	5.9	14.3
XZ009	申扎县	2019-12-17 16:00:00	0	0	0	0	0	0	0.1	0	0.2	0.4	0.4	0.5	0.6	0.7	1.6	0.8	1	1.6	1.4	2.1	2	1.7	2.6	1.9	1.1	1.4	2.1	1.1	3.9	6	5.8	14.2
XZ009	申扎县	2019-12-17 17:00:00	0	0	0	0	0	0	0.1	0	0.3	0.4	0.4	0.5	0.6	0.7	1.6	0.8	1	1.5	1.3	2	2	1.7	2.6	1.9	1.1	1.3	2.1	1.1	3.9	5.9	5.7	14.2
XZ009	申扎县	2019-12-17 18:00:00	0	0	0	0	0	0	0.1	0	0.3	0.4	0.4	0.5	0.6	0.7	1.6	0.8	1	1.5	1.3	2	2	1.7	2.6	1.9	1	1.3	2.1	1	3.9	5.9	5.7	14.1
XZ009	申扎县	2019-12-17 19:00:00	0	0	0	0	0	0	0.1	0	0.3	0.4	0.4	0.5	0.6	0.7	1.6	0.8	1	1.5	1.3	2	2	1.7	2.6	1.8	1	1.3	2.1	1	3.9	5.9	5.6	14.1
XZ009	申扎县	2019-12-17 20:00:00	0	0	0	0	0	0	0.1	0.1	0.3	0.5	0.4	0.5	0.6	0.7	1.6	0.8	1	1.5	1.3	2	2	1.7	2.6	1.8	1	1.3	2.1	1	3.8	5.8	5.5	14
XZ009	申扎县	2019-12-17 21:00:00	0	0	0	0	0	0	0.1	0.1	0.3	0.5	0.4	0.5	0.6	0.7	1.6	0.8	1	1.5	1.3	2	2	1.7	2.5	1.8	1	1.3	2	1	3.8	5.8	5.4	13.9
XZ009	申扎县	2019-12-17 22:00:00	0	0	0	0	0	0	0.1	0.1	0.3	0.5	0.4	0.5	0.6	0.7	1.6	0.8	1	1.5	1.3	1.9	1.9	1.7	2.5	1.8	1	1.3	2	1	3.8	5.7	5.4	13.9
XZ009	申扎县	2019-12-17 23:00:00	0	0	0	0	0	0	0.1	0	0.3	0.5	0.4	0.5	0.6	0.7	1.6	0.8	1	1.5	1.3	2	1.9	1.6	2.5	1.8	1	1.3	2	1	3.8	5.7	5.3	13.8
XZ009	申扎县	2019-12-18 00:00:00	0	0	0	0	0	0	0.1	0	0.3	0.5	0.4	0.5	0.6	0.7	1.6	0.8	1	1.5	1.3	2	1.9	1.6	2.5	1.8	1	1.2	2	1	3.8	5.7	5.2	13.7
XZ009	申扎县	2019-12-18 01:00:00	0	0	0	0	0	0	0.1	0	0.3	0.5	0.4	0.5	0.6	0.7	1.6	0.8	1	1.5	1.3	2	1.9	1.6	2.5	1.8	1	1.2	2	1	3.8	5.6	5.1	13.7
XZ009	申扎县	2019-12-18 02:00:00	0	0	0	0	0	0	0.1	0	0.3	0.5	0.4	0.5	0.6	0.7	1.6	0.8	1	1.5	1.3	1.9	1.9	1.6	2.5	1.8	1	1.2	2	1	3.8	5.6	5.1	13.6
XZ009	申扎县	2019-12-18 03:00:00	0	0	0	0	0	0	0.1	0	0.3	0.4	0.4	0.5	0.6	0.7	1.6	0.8	1	1.5	1.3	1.9	1.9	1.6	2.4	1.7	1	1.2	1.9	1	3.7	5.6	5	13.6
XZ009	申扎县	2019-12-18 04:00:00	0	0	0	0	0	0	0	0	0.2	0.4	0.4	0.5	0.6	0.7	1.6	0.8	1	1.5	1.3	1.9	1.9	1.6	2.4	1.8	1	1.2	1.9	1	3.7	5.5	5	13.5
XZ009	申扎县	2019-12-18 05:00:00	0	0	0	0	0	0	0	0	0.2	0.4	0.4	0.5	0.6	0.7	1.6	0.8	1	1.5	1.3	1.9	1.9	1.6	2.4	1.7	0.9	1.2	1.9	1	3.7	5.5	4.9	13.4
XZ009	申扎县	2019-12-18 06:00:00	0	0	0	0	0	0	0	0	0.2	0.4	0.4	0.5	0.6	0.7	1.6	0.8	1	1.5	1.3	1.9	1.9	1.6	2.4	1.7	0.9	1.2	1.9	0.9	3.7	5.4	4.8	13.3
XZ009	申扎县	2019-12-18 07:00:00	0	0	0	0	0	0	0	0	0.2	0.4	0.4	0.5	0.6	0.6	1.6	0.8	0.9	1.5	1.3	1.9	1.9	1.6	2.4	1.7	0.9	1.2	1.9	0.9	3.7	5.4	4.8	13.3
XZ009	申扎县	2019-12-18 08:00:00	0	0	0	0	0	0	0	0	0.2	0.4	0.3	0.5	0.6	0.6	1.6	0.8	0.9	1.5	1.3	1.9	1.9	1.6	2.4	1.7	0.9	1.2	1.9	0.9	3.7	5.4	4.8	13.2
XZ009	申扎县	2019-12-18 09:00:00	0	0	0	0	0	0	0	0	0.2	0.3	0.3	0.5	0.5	0.6	1.6	0.8	0.9	1.4	1.3	1.9	1.9	1.6	2.4	1.7	0.9	1.2	1.9	0.9	3.6	5.3	4.7	13.1
XZ009	申扎县	2019-12-18 10:00:00	0	0	0	0	0	0	0	0	0.2	0.3	0.3	0.5	0.5	0.6	1.6	0.8	0.9	1.5	1.3	1.9	1.8	1.6	2.4	1.7	0.9	1.2	1.8	0.9	3.6	5.3	4.7	13
XZ009	申扎县	2019-12-19 10:00:00	0	0	0	0	0	0	0.1	0	0.2	0.4	0.4	0.5	0.6	0.6	1.5	0.7	0.9	1.4	1.2	1.7	1.7	1.4	2.2	1.5	0.8	0.9	1.5	0.6	3.3	4.4	3.9	11.3
XZ009	申扎县	2019-12-19 11:00:00	0	0	0	0	0	0	0	0	0.2	0.4	0.4	0.5	0.5	0.6	1.5	0.7	0.9	1.4	1.2	1.8	1.7	1.4	2.2	1.5	0.8	0.9	1.5	0.6	3.3	4.4	3.8	11.3
XZ009	申扎县	2019-12-19 12:00:00	0	0	0	0	0	0	0	0	0.2	0.4	0.4	0.5	0.5	0.6	1.5	0.7	0.9	1.3	1.2	1.7	1.7	1.4	2.2	1.5	0.8	0.9	1.5	0.6	3.3	4.4	3.8	11.2
XZ009	申扎县	2019-12-19 13:00:00	0	0	0	0	0	0	0.1	0	0.2	0.4	0.4	0.5	0.5	0.6	1.5	0.7	0.9	1.4	1.2	1.7	1.7	1.4	2.1	1.5	0.8	0.9	1.5	0.6	3.3	4.4	3.8	11.2
XZ009	申扎县	2019-12-19 14:00:00	0	0	0	0	0	0	0.1	0	0.3	0.4	0.4	0.5	0.5	0.6	1.5	0.7	0.9	1.4	1.2	1.7	1.7	1.4	2.2	1.5	0.7	0.9	1.5	0.6	3.3	4.4	3.8	11.2
XZ009	申扎县	2019-12-19 15:00:00	0	0.1	0	0	0	0	0.1	0	0.3	0.4	0.4	0.5	0.5	0.6	1.5	0.7	0.9	1.4	1.2	1.7	1.7	1.4	2.2	1.5	0.8	0.9	1.5	0.6	3.3	4.3	3.8	11.1
XZ009	申扎县	2019-12-19 16:00:00	0	0.1	0	0	0	0	0.1	0.1	0.3	0.4	0.4	0.5	0.5	0.6	1.5	0.7	0.9	1.4	1.2	1.7	1.7	1.4	2.2	1.5	0.8	0.9	1.5	0.6	3.3	4.3	3.8	11.1
XZ009	申扎县	2019-12-19 17:00:00	0	0.2	0	0	0	0	0.1	0.1	0.3	0.5	0.4	0.5	0.6	0.6	1.5	0.7	0.9	1.4	1.2	1.7	1.7	1.4	2.2	1.5	0.7	0.9	1.5	0.6	3.3	4.3	3.8	11.1
XZ009	申扎县	2019-12-19 18:00:00	0	0.2	0	0	0	0	0.1	0.1	0.3	0.5	0.4	0.5	0.6	0.6	1.5	0.7	0.9	1.4	1.2	1.7	1.7	1.4	2.1	1.5	0.7	0.9	1.5	0.6	3.2	4.3	3.7	11
XZ009	申扎县	2019-12-19 19:00:00	0	0.1	0	0	0	0	0.1	0.1	0.3	0.5	0.4	0.5	0.6	0.6	1.5	0.8	0.9	1.4	1.2	1.7	1.7	1.4	2.1	1.5	0.7	0.9	1.5	0.6	3.3	4.3	3.7	11
XZ009	申扎县	2019-12-19 20:00:00	0	0.1	0	0	0	0	0.2	0.1	0.3	0.5	0.4	0.5	0.6	0.6	1.6	0.8	0.9	1.4	1.2	1.7	1.7	1.4	2.1	1.5	0.7	0.9	1.4	0.6	3.2	4.2	3.7	11
XZ009	申扎县	2019-12-19 21:00:00	0	0	0	0	0	0	0.2	0.1	0.4	0.5	0.4	0.5	0.6	0.6	1.6	0.8	0.9	1.4	1.2	1.7	1.7	1.4	2.1	1.5	0.7	0.9	1.4	0.6	3.2	4.2	3.7	10.9
XZ009	申扎县	2019-12-19 22:00:00	0	0	0	0	0	0	0.2	0.1	0.4	0.6	0.5	0.5	0.6	0.7	1.6	0.8	0.9	1.4	1.2	1.7	1.7	1.4	2.1	1.5	0.7	0.9	1.4	0.6	3.2	4.2	3.7	10.9
XZ009	申扎县	2019-12-19 23:00:00	0	0	0	0	0	0	0.2	0.1	0.4	0.6	0.5	0.5	0.6	0.7	1.6	0.8	0.9	1.4	1.2	1.7	1.7	1.4	2.1	1.5	0.7	0.9	1.4	0.6	3.2	4.2	3.7	10.9
XZ009	申扎县	2019-12-20 00:00:00	0	0	0	0	0	0	0.2	0.1	0.4	0.6	0.5	0.6	0.6	0.7	1.6	0.8	0.9	1.4	1.2	1.7	1.7	1.4	2.1	1.5	0.7	0.9	1.4	0.5	3.2	4.2	3.6	10.8
XZ009	申扎县	2019-12-20 01:00:00	0	0	0	0	0	0	0.1	0.1	0.4	0.6	0.5	0.6	0.6	0.7	1.6	0.8	0.9	1.4	1.2	1.8	1.7	1.4	2.1	1.5	0.7	0.9	1.4	0.5	3.2	4.2	3.6	10.8
XZ009	申扎县	2019-12-20 02:00:00	0	0	0	0	0	0	0.1	0.1	0.4	0.6	0.5	0.6	0.6	0.7	1.6	0.8	0.9	1.4	1.2	1.8	1.7	1.4	2.1	1.5	0.7	0.9	1.4	0.5	3.2	4.1	3.6	10.8
XZ009	申扎县	2019-12-20 03:00:00	0	0	0	0	0	0	0.1	0.1	0.3	0.6	0.5	0.6	0.6	0.7	1.6	0.8	0.9	1.4	1.2	1.8	1.7	1.4	2.1	1.5	0.7	0.9	1.4	0.5	3.2	4.1	3.6	10.8
XZ009	申扎县	2019-12-20 04:00:00	0	0	0	0	0	0	0.1	0.1	0.3	0.5	0.4	0.6	0.6	0.7	1.6	0.8	0.9	1.4	1.2	1.8	1.7	1.4	2.1	1.5	0.7	0.9	1.4	0.5	3.1	4.1	3.6	10.7
XZ009	申扎县	2019-12-20 05:00:00	0	0	0	0	0	0	0.1	0.1	0.3	0.5	0.4	0.6	0.6	0.7	1.6	0.8	0.9	1.4	1.2	1.8	1.7	1.4	2.1	1.5	0.7	0.9	1.4	0.5	3.1	4.1	3.6	10.7
XZ009	申扎县	2019-12-20 06:00:00	0	0	0	0	0	0	0.1	0.1	0.3	0.5	0.4	0.6	0.6	0.7	1.6	0.8	0.9	1.4	1.2	1.8	1.7	1.4	2.2	1.5	0.7	0.9	1.4	0.5	3.1	4.1	3.6	10.7
XZ009	申扎县	2019-12-20 07:00:00	0	0	0	0	0	0	0.1	0.1	0.3	0.5	0.4	0.5	0.6	0.7	1.6	0.8	0.9	1.4	1.2	1.8	1.7	1.5	2.1	1.5	0.7	0.9	1.4	0.5	3.1	4	3.6	10.7
XZ009	申扎县	2019-12-20 08:00:00	0	0	0	0	0	0	0.1	0.1	0.3	0.5	0.4	0.5	0.6	0.7	1.6	0.8	0.9	1.4	1.2	1.8	1.7	1.4	2.1	1.5	0.7	0.9	1.4	0.5	3.1	4	3.6	10.7
XZ009	申扎县	2019-12-20 09:00:00	0	0	0	0	0	0	0.1	0.1	0.3	0.5	0.4	0.5	0.6	0.7	1.6	0.8	0.9	1.4	1.2	1.8	1.7	1.4	2.2	1.5	0.7	0.9	1.4	0.5	3.1	4	3.6	10.7
XZ009	申扎县	2019-12-20 10:00:00	0	0	0	0	0	0	0.1	0.1	0.3	0.5	0.4	0.5	0.6	0.7	1.6	0.8	0.9	1.4	1.2	1.8	1.7	1.4	2.1	1.5	0.7	0.9	1.4	0.5	3.1	4	3.6	10.6
XZ009	申扎县	2019-12-20 12:00:00	0	0	0	0	0	0	0.1	0.1	0.3	0.5	0.4	0.5	0.6	0.7	1.6	0.8	0.9	1.4	1.2	1.8	1.7	1.4	2.1	1.5	0.7	0.9	1.4	0.5	3.2	4	3.6	10.6
XZ009	申扎县	2019-12-20 13:00:00	0	0	0	0	0	0	0.1	0.1	0.3	0.5	0.4	0.5	0.6	0.7	1.6	0.8	0.9	1.4	1.2	1.8	1.7	1.4	2.2	1.5	0.7	0.9	1.4	0.5	3.1	4	3.6	10.6
XZ009	申扎县	2019-12-20 15:00:00	0	0.1	0	0	0	0	0.1	0.1	0.3	0.5	0.4	0.5	0.6	0.7	1.6	0.8	0.9	1.4	1.2	1.8	1.7	1.4	2.1	1.5	0.7	0.9	1.4	0.5	3.1	4	3.5	10.6
XZ009	申扎县	2019-12-20 16:00:00	0	0.2	0	0	0	0	0.1	0.1	0.3	0.5	0.4	0.5	0.6	0.7	1.6	0.8	0.9	1.4	1.2	1.8	1.7	1.4	2.2	1.5	0.7	0.9	1.4	0.5	3.1	4	3.5	10.6
XZ009	申扎县	2019-12-20 18:00:00	0	0.2	0	0	0.1	0	0.2	0.1	0.4	0.6	0.5	0.5	0.6	0.7	1.6	0.8	0.9	1.4	1.2	1.8	1.7	1.4	2.2	1.5	0.7	0.9	1.4	0.5	3.1	4	3.5	10.6
XZ009	申扎县	2019-12-20 19:00:00	0	0.2	0	0	0.1	0	0.2	0.2	0.4	0.6	0.5	0.6	0.6	0.7	1.6	0.8	0.9	1.4	1.2	1.8	1.7	1.4	2.1	1.5	0.7	0.9	1.4	0.5	3.1	4	3.5	10.6
XZ009	申扎县	2019-12-20 21:00:00	0	0.1	0	0	0.1	0	0.2	0.2	0.4	0.6	0.5	0.6	0.7	0.7	1.6	0.8	0.9	1.4	1.2	1.8	1.7	1.4	2.2	1.5	0.7	0.9	1.4	0.5	3.1	3.9	3.5	10.6
XZ009	申扎县	2019-12-20 22:00:00	0	0.1	0	0	0.1	0	0.2	0.2	0.4	0.6	0.5	0.6	0.7	0.7	1.6	0.8	0.9	1.4	1.2	1.8	1.7	1.4	2.2	1.5	0.7	0.9	1.4	0.5	3.1	4	3.5	10.5
XZ009	申扎县	2019-12-21 00:00:00	0	0	0	0	0	0	0.2	0.2	0.4	0.6	0.5	0.6	0.7	0.7	1.6	0.8	0.9	1.4	1.2	1.8	1.7	1.4	2.1	1.5	0.7	0.9	1.4	0.5	3.1	4	3.5	10.5
XZ009	申扎县	2019-12-21 01:00:00	0	0	0	0	0	0	0.2	0.2	0.4	0.6	0.5	0.6	0.7	0.7	1.6	0.8	0.9	1.4	1.2	1.8	1.7	1.4	2.2	1.5	0.7	0.9	1.4	0.5	3.1	4	3.5	10.5
XZ009	申扎县	2019-12-21 02:00:00	0	0	0	0	0	0	0.2	0.2	0.4	0.6	0.5	0.6	0.7	0.7	1.6	0.8	0.9	1.4	1.2	1.8	1.7	1.4	2.2	1.5	0.7	0.9	1.4	0.5	3.1	3.9	3.5	10.5
XZ009	申扎县	2019-12-21 03:00:00	0	0	0	0	0	0	0.2	0.2	0.4	0.6	0.5	0.6	0.7	0.7	1.6	0.8	0.9	1.4	1.2	1.8	1.7	1.5	2.2	1.5	0.7	0.9	1.4	0.5	3.1	3.9	3.5	10.5
XZ009	申扎县	2019-12-21 04:00:00	0	0	0	0	0	0	0.2	0.1	0.4	0.6	0.5	0.6	0.7	0.7	1.7	0.8	0.9	1.4	1.2	1.8	1.8	1.5	2.2	1.5	0.7	0.9	1.4	0.5	3.1	3.9	3.4	10.5
XZ009	申扎县	2019-12-21 05:00:00	0	0	0	0	0	0	0.1	0.1	0.4	0.6	0.5	0.6	0.7	0.7	1.6	0.8	0.9	1.4	1.2	1.8	1.7	1.5	2.2	1.5	0.7	0.9	1.4	0.5	3.1	3.9	3.5	10.5
XZ009	申扎县	2019-12-21 06:00:00	0	0	0	0	0	0	0.1	0.1	0.4	0.6	0.5	0.6	0.7	0.7	1.6	0.8	0.9	1.4	1.2	1.8	1.8	1.5	2.2	1.5	0.8	0.9	1.4	0.5	3.1	3.9	3.5	10.5
XZ009	申扎县	2019-12-21 07:00:00	0	0	0	0	0	0	0.1	0.1	0.4	0.6	0.5	0.6	0.7	0.7	1.7	0.9	0.9	1.4	1.2	1.8	1.7	1.5	2.2	1.5	0.8	0.9	1.4	0.5	3.1	3.9	3.5	10.5
XZ009	申扎县	2019-12-21 08:00:00	0	0	0	0	0	0	0.1	0.1	0.4	0.6	0.5	0.6	0.7	0.7	1.6	0.8	0.9	1.4	1.2	1.8	1.8	1.5	2.2	1.5	0.8	0.9	1.4	0.5	3.1	3.9	3.4	10.5
XZ009	申扎县	2019-12-21 09:00:00	0	0	0	0	0	0	0.1	0.1	0.3	0.6	0.5	0.6	0.7	0.7	1.6	0.8	0.9	1.4	1.2	1.9	1.8	1.5	2.2	1.5	0.8	0.9	1.4	0.5	3.1	3.9	3.5	10.4
XZ009	申扎县	2019-12-21 10:00:00	0	0	0	0	0	0	0.1	0.1	0.3	0.6	0.5	0.6	0.7	0.7	1.6	0.8	0.9	1.4	1.2	1.9	1.8	1.5	2.2	1.5	0.8	0.9	1.4	0.5	3.1	3.9	3.5	10.5
XZ009	申扎县	2019-12-21 11:00:00	0	0	0	0	0	0	0.1	0.1	0.3	0.5	0.5	0.6	0.7	0.7	1.6	0.8	0.9	1.4	1.2	1.8	1.8	1.5	2.2	1.5	0.8	0.9	1.4	0.5	3.1	3.9	3.5	10.4
XZ009	申扎县	2019-12-21 12:00:00	0	0	0	0	0	0	0.1	0.1	0.3	0.5	0.4	0.6	0.7	0.7	1.6	0.8	0.9	1.4	1.2	1.8	1.8	1.5	2.2	1.5	0.8	0.9	1.4	0.5	3.1	3.9	3.5	10.5
XZ009	申扎县	2019-12-21 13:00:00	0	0	0	0	0	0	0.1	0.1	0.3	0.5	0.4	0.6	0.7	0.7	1.6	0.8	0.9	1.4	1.2	1.8	1.8	1.5	2.2	1.5	0.7	0.9	1.4	0.5	3.1	3.9	3.5	10.4
XZ009	申扎县	2019-12-21 14:00:00	0	0.1	0	0	0	0	0.1	0.1	0.3	0.5	0.4	0.6	0.7	0.7	1.6	0.8	0.9	1.4	1.2	1.9	1.7	1.5	2.2	1.5	0.8	0.9	1.4	0.5	3.1	3.9	3.4	10.4
XZ009	申扎县	2019-12-21 15:00:00	0	0.1	0	0	0	0	0.1	0.1	0.3	0.5	0.5	0.6	0.7	0.7	1.6	0.8	0.9	1.4	1.2	1.8	1.8	1.5	2.2	1.5	0.8	0.9	1.4	0.5	3.1	3.9	3.5	10.4
XZ009	申扎县	2019-12-21 16:00:00	0	0.2	0	0	0	0	0.1	0.1	0.4	0.6	0.5	0.6	0.7	0.7	1.6	0.8	0.9	1.4	1.2	1.8	1.8	1.5	2.2	1.5	0.8	0.9	1.4	0.5	3.1	3.9	3.5	10.4
XZ009	申扎县	2019-12-21 17:00:00	0	0.3	0	0	0.1	0	0.2	0.2	0.4	0.6	0.5	0.6	0.7	0.7	1.6	0.8	0.9	1.4	1.2	1.8	1.8	1.5	2.2	1.5	0.8	0.9	1.4	0.5	3.1	3.9	3.5	10.4
XZ009	申扎县	2019-12-21 18:00:00	0	0.3	0	0	0.1	0	0.2	0.2	0.4	0.6	0.5	0.6	0.7	0.7	1.6	0.8	0.9	1.4	1.2	1.8	1.8	1.5	2.2	1.5	0.8	0.9	1.4	0.5	3.1	3.9	3.4	10.5
XZ009	申扎县	2019-12-21 19:00:00	0	0.2	0	0	0.1	0	0.2	0.2	0.4	0.6	0.5	0.6	0.7	0.7	1.6	0.8	0.9	1.4	1.2	1.8	1.8	1.5	2.2	1.5	0.8	0.9	1.4	0.5	3.1	3.9	3.5	10.5
XZ009	申扎县	2019-12-21 20:00:00	0	0.2	0	0	0.1	0	0.2	0.2	0.4	0.6	0.5	0.6	0.7	0.7	1.6	0.8	0.9	1.4	1.2	1.8	1.8	1.5	2.2	1.5	0.8	0.9	1.4	0.5	3.1	3.9	3.5	10.5
XZ009	申扎县	2019-12-21 21:00:00	0	0.1	0	0	0.1	0	0.2	0.2	0.4	0.7	0.5	0.6	0.7	0.7	1.7	0.8	0.9	1.4	1.2	1.9	1.8	1.5	2.2	1.5	0.8	0.9	1.4	0.5	3.1	3.9	3.5	10.4
XZ009	申扎县	2019-12-21 22:00:00	0	0	0	0	0.1	0	0.2	0.2	0.4	0.7	0.5	0.6	0.7	0.7	1.7	0.9	0.9	1.4	1.2	1.8	1.8	1.5	2.2	1.5	0.8	0.9	1.4	0.5	3.1	3.9	3.5	10.4
XZ009	申扎县	2019-12-21 23:00:00	0	0	0	0	0.1	0	0.2	0.2	0.4	0.7	0.5	0.6	0.7	0.7	1.7	0.9	0.9	1.4	1.2	1.9	1.8	1.5	2.2	1.5	0.8	0.9	1.4	0.5	3.1	3.9	3.4	10.4
XZ009	申扎县	2019-12-22 00:00:00	0	0	0	0	0	0	0.2	0.2	0.4	0.7	0.5	0.6	0.7	0.7	1.7	0.8	0.9	1.4	1.2	1.9	1.8	1.5	2.2	1.5	0.8	0.9	1.4	0.5	3.1	3.9	3.4	10.4
XZ009	申扎县	2019-12-22 01:00:00	0	0	0	0	0	0	0.2	0.2	0.4	0.7	0.5	0.6	0.7	0.7	1.7	0.9	0.9	1.5	1.2	1.9	1.8	1.5	2.2	1.5	0.7	0.9	1.4	0.5	3.1	3.9	3.4	10.4
XZ009	申扎县	2019-12-22 02:00:00	0	0	0	0	0	0	0.2	0.2	0.4	0.7	0.5	0.6	0.7	0.7	1.7	0.9	1	1.4	1.2	1.9	1.8	1.5	2.2	1.5	0.8	0.9	1.4	0.5	3.1	3.9	3.5	10.4
XZ009	申扎县	2019-12-22 03:00:00	0	0	0	0	0	0	0.2	0.2	0.4	0.6	0.5	0.6	0.7	0.7	1.7	0.9	1	1.4	1.2	1.9	1.8	1.5	2.2	1.5	0.7	0.9	1.4	0.5	3.1	3.9	3.4	10.4
XZ009	申扎县	2019-12-22 04:00:00	0	0	0	0	0	0	0.2	0.2	0.4	0.6	0.5	0.6	0.7	0.7	1.7	0.9	1	1.4	1.2	1.9	1.8	1.5	2.2	1.5	0.8	0.9	1.4	0.5	3.1	3.9	3.4	10.4
XZ009	申扎县	2019-12-22 05:00:00	0	0	0	0	0	0	0.1	0.1	0.4	0.6	0.5	0.6	0.7	0.7	1.7	0.9	1	1.4	1.2	1.9	1.8	1.5	2.2	1.5	0.8	0.9	1.4	0.5	3.1	3.9	3.4	10.4
XZ009	申扎县	2019-12-22 06:00:00	0	0	0	0	0	0	0.1	0.1	0.4	0.6	0.5	0.6	0.7	0.7	1.7	0.9	1	1.4	1.2	1.9	1.8	1.5	2.2	1.5	0.8	0.9	1.4	0.5	3.1	3.9	3.4	10.4
XZ009	申扎县	2019-12-22 07:00:00	0	0	0	0	0	0	0.1	0.1	0.4	0.6	0.5	0.6	0.7	0.7	1.7	0.9	1	1.4	1.3	1.9	1.8	1.5	2.2	1.5	0.8	0.9	1.4	0.5	3.1	3.9	3.4	10.4
XZ009	申扎县	2019-12-22 08:00:00	0	0	0	0	0	0	0.1	0.1	0.3	0.6	0.5	0.6	0.7	0.7	1.7	0.9	1	1.4	1.3	1.9	1.8	1.5	2.2	1.5	0.8	0.9	1.4	0.5	3.1	3.9	3.4	10.4
XZ009	申扎县	2019-12-22 09:00:00	0	0	0	0	0	0	0.1	0.1	0.3	0.5	0.5	0.6	0.7	0.7	1.7	0.9	1	1.4	1.2	1.9	1.8	1.5	2.2	1.5	0.8	0.9	1.4	0.5	3.1	3.9	3.4	10.4
XZ009	申扎县	2019-12-22 10:00:00	0	0	0	0	0	0	0.1	0.1	0.3	0.5	0.5	0.6	0.7	0.7	1.6	0.8	1	1.5	1.2	1.9	1.8	1.5	2.2	1.5	0.8	0.9	1.4	0.5	3.1	3.9	3.4	10.4
XZ009	申扎县	2019-12-22 11:00:00	0	0	0	0	0	0	0.1	0	0.3	0.5	0.4	0.6	0.6	0.7	1.6	0.8	1	1.5	1.2	1.9	1.8	1.5	2.2	1.5	0.8	0.9	1.4	0.5	3.1	3.9	3.4	10.4
XZ009	申扎县	2019-12-22 12:00:00	0	0	0	0	0	0	0.1	0	0.3	0.5	0.4	0.6	0.6	0.7	1.6	0.8	0.9	1.4	1.3	1.9	1.8	1.5	2.2	1.5	0.8	0.9	1.4	0.5	3.1	3.9	3.4	10.4
XZ009	申扎县	2019-12-22 13:00:00	0	0	0	0	0	0	0.1	0	0.3	0.5	0.4	0.5	0.6	0.7	1.6	0.8	0.9	1.4	1.2	1.9	1.8	1.5	2.2	1.5	0.8	0.9	1.4	0.5	3.1	3.9	3.4	10.4
XZ009	申扎县	2019-12-22 14:00:00	0	0	0	0	0	0	0.1	0	0.3	0.5	0.4	0.5	0.6	0.7	1.6	0.8	0.9	1.4	1.3	1.9	1.8	1.5	2.2	1.5	0.8	0.9	1.4	0.5	3.1	3.9	3.4	10.4
XZ009	申扎县	2019-12-22 15:00:00	0	0.1	0	0	0	0	0.1	0.1	0.3	0.5	0.4	0.5	0.6	0.7	1.6	0.8	0.9	1.4	1.2	1.9	1.8	1.5	2.2	1.5	0.8	0.9	1.4	0.5	3.1	3.9	3.4	10.4
XZ009	申扎县	2019-12-22 16:00:00	0	0.1	0	0	0	0	0.1	0.1	0.3	0.5	0.4	0.5	0.6	0.7	1.6	0.8	0.9	1.4	1.2	1.8	1.8	1.5	2.2	1.5	0.8	0.9	1.4	0.5	3.1	3.9	3.4	10.4
XZ009	申扎县	2019-12-22 17:00:00	0	0.1	0	0	0	0	0.1	0.1	0.3	0.5	0.4	0.5	0.6	0.7	1.6	0.8	0.9	1.4	1.2	1.8	1.8	1.5	2.2	1.5	0.8	0.9	1.4	0.5	3.1	3.9	3.4	10.4
XZ009	申扎县	2019-12-22 18:00:00	0	0.1	0	0	0	0	0.1	0.1	0.4	0.5	0.5	0.6	0.6	0.7	1.6	0.8	0.9	1.4	1.2	1.8	1.8	1.5	2.2	1.5	0.8	0.9	1.4	0.5	3.1	3.9	3.4	10.4
XZ009	申扎县	2019-12-22 19:00:00	0	0.1	0	0	0	0	0.2	0.1	0.4	0.6	0.5	0.6	0.6	0.7	1.6	0.8	0.9	1.4	1.2	1.8	1.8	1.5	2.2	1.5	0.8	0.9	1.4	0.5	3.1	3.9	3.4	10.4
XZ009	申扎县	2019-12-22 20:00:00	0	0	0	0	0	0	0.2	0.1	0.4	0.6	0.5	0.6	0.7	0.7	1.6	0.8	0.9	1.4	1.2	1.8	1.7	1.5	2.2	1.5	0.8	0.9	1.4	0.5	3.1	3.9	3.4	10.4
XZ009	申扎县	2019-12-22 21:00:00	0	0	0	0	0	0	0.2	0.2	0.4	0.6	0.5	0.6	0.7	0.7	1.6	0.8	0.9	1.4	1.2	1.8	1.7	1.5	2.2	1.5	0.8	0.9	1.4	0.5	3.1	3.9	3.4	10.4
XZ009	申扎县	2019-12-22 22:00:00	0	0	0	0	0	0	0.2	0.2	0.4	0.6	0.5	0.6	0.7	0.7	1.6	0.8	0.9	1.4	1.2	1.8	1.8	1.5	2.2	1.5	0.8	0.9	1.4	0.5	3.1	3.9	3.4	10.3
XZ009	申扎县	2019-12-22 23:00:00	0	0	0	0	0	0	0.2	0.1	0.4	0.6	0.5	0.6	0.7	0.7	1.6	0.8	0.9	1.4	1.2	1.8	1.7	1.5	2.2	1.5	0.7	0.9	1.4	0.5	3.1	3.9	3.4	10.4
XZ009	申扎县	2019-12-23 00:00:00	0	0	0	0	0	0	0.1	0.1	0.4	0.6	0.5	0.6	0.7	0.7	1.6	0.8	0.9	1.4	1.2	1.8	1.8	1.5	2.2	1.5	0.7	0.9	1.4	0.5	3.1	3.9	3.4	10.3
XZ009	申扎县	2019-12-23 01:00:00	0	0	0	0	0	0	0.1	0.1	0.4	0.6	0.5	0.6	0.7	0.7	1.6	0.8	0.9	1.4	1.2	1.8	1.8	1.5	2.1	1.5	0.8	0.9	1.4	0.5	3.1	3.9	3.4	10.3
XZ009	申扎县	2019-12-23 02:00:00	0	0	0	0	0	0	0.1	0.1	0.3	0.6	0.5	0.6	0.7	0.7	1.6	0.8	0.9	1.4	1.2	1.8	1.8	1.5	2.2	1.5	0.7	0.9	1.4	0.5	3.1	3.9	3.4	10.3
XZ009	申扎县	2019-12-23 03:00:00	0	0	0	0	0	0	0.1	0.1	0.3	0.5	0.5	0.6	0.7	0.7	1.6	0.8	0.9	1.4	1.2	1.8	1.8	1.5	2.2	1.5	0.7	0.9	1.4	0.5	3.1	3.9	3.4	10.3
XZ009	申扎县	2019-12-23 04:00:00	0	0	0	0	0	0	0.1	0.1	0.3	0.5	0.5	0.6	0.7	0.7	1.6	0.8	0.9	1.4	1.2	1.8	1.7	1.5	2.2	1.5	0.7	0.9	1.4	0.5	3.1	3.8	3.4	10.3
XZ009	申扎县	2019-12-23 05:00:00	0	0	0	0	0	0	0.1	0	0.3	0.5	0.4	0.6	0.6	0.7	1.6	0.8	0.9	1.4	1.2	1.8	1.7	1.5	2.2	1.5	0.7	0.9	1.4	0.5	3.1	3.8	3.4	10.3
XZ009	申扎县	2019-12-23 06:00:00	0	0	0	0	0	0	0.1	0	0.3	0.5	0.4	0.6	0.6	0.7	1.6	0.8	1	1.4	1.2	1.8	1.7	1.5	2.2	1.5	0.7	0.9	1.4	0.5	3.1	3.8	3.4	10.3
XZ009	申扎县	2019-12-23 07:00:00	0	0	0	0	0	0	0.1	0	0.3	0.5	0.4	0.5	0.6	0.7	1.6	0.8	0.9	1.4	1.2	1.8	1.8	1.5	2.2	1.5	0.7	0.9	1.4	0.5	3.1	3.8	3.4	10.3
XZ009	申扎县	2019-12-23 08:00:00	0	0	0	0	0	0	0	0	0.3	0.4	0.4	0.5	0.6	0.7	1.6	0.8	0.9	1.4	1.2	1.8	1.7	1.4	2.2	1.5	0.7	0.9	1.4	0.5	3.1	3.8	3.4	10.3
XZ009	申扎县	2019-12-23 09:00:00	0	0	0	0	0	0	0	0	0.2	0.4	0.4	0.5	0.6	0.7	1.6	0.8	0.9	1.4	1.2	1.8	1.7	1.4	2.2	1.5	0.7	0.9	1.4	0.5	3.1	3.8	3.4	10.3
XZ009	申扎县	2019-12-23 10:00:00	0	0	0	0	0	0	0	0	0.2	0.4	0.4	0.5	0.6	0.6	1.6	0.8	0.9	1.4	1.2	1.8	1.7	1.4	2.2	1.5	0.8	0.9	1.4	0.5	3.1	3.8	3.4	10.3
XZ009	申扎县	2019-12-23 11:00:00	0	0	0	0	0	0	0	0	0.2	0.4	0.4	0.5	0.6	0.6	1.6	0.8	0.9	1.4	1.2	1.8	1.7	1.4	2.1	1.5	0.8	0.9	1.4	0.5	3	3.8	3.3	10.3
XZ009	申扎县	2019-12-23 12:00:00	0	0	0	0	0	0	0	0	0.2	0.4	0.4	0.5	0.6	0.6	1.5	0.8	0.9	1.4	1.2	1.8	1.7	1.4	2.1	1.5	0.7	0.9	1.4	0.5	3	3.8	3.4	10.3
XZ009	申扎县	2019-12-23 14:00:00	0	0	0	0	0	0	0	0	0.2	0.4	0.3	0.5	0.5	0.6	1.5	0.8	0.9	1.4	1.2	1.8	1.7	1.4	2.1	1.5	0.7	0.9	1.4	0.5	3	3.8	3.3	10.3
XZ009	申扎县	2019-12-23 15:00:00	0	0	0	0	0	0	0	0	0.2	0.4	0.3	0.5	0.5	0.6	1.5	0.8	0.9	1.4	1.2	1.8	1.7	1.4	2.1	1.5	0.7	0.9	1.4	0.5	3	3.8	3.3	10.3
XZ009	申扎县	2019-12-23 16:00:00	0	0	0	0	0	0	0.1	0	0.2	0.4	0.4	0.5	0.5	0.6	1.5	0.7	0.9	1.3	1.2	1.7	1.7	1.4	2.1	1.5	0.7	0.9	1.4	0.5	3	3.8	3.3	10.2
XZ009	申扎县	2019-12-23 17:00:00	0	0.1	0	0	0	0	0.1	0	0.3	0.4	0.4	0.5	0.5	0.6	1.5	0.7	0.9	1.4	1.2	1.7	1.7	1.4	2.1	1.5	0.7	0.9	1.4	0.5	3	3.8	3.3	10.2
XZ009	申扎县	2019-12-23 18:00:00	0	0.1	0	0	0	0	0.1	0.1	0.3	0.4	0.4	0.5	0.6	0.6	1.5	0.7	0.8	1.3	1.2	1.7	1.7	1.4	2.1	1.5	0.7	0.9	1.4	0.5	3	3.8	3.3	10.2
XZ009	申扎县	2019-12-23 19:00:00	0	0	0	0	0	0	0.1	0.1	0.3	0.5	0.4	0.5	0.6	0.6	1.5	0.7	0.9	1.4	1.2	1.7	1.7	1.4	2.1	1.4	0.7	0.9	1.4	0.5	3	3.8	3.3	10.2
XZ009	申扎县	2019-12-23 20:00:00	0	0	0	0	0	0	0.1	0.1	0.3	0.5	0.4	0.5	0.6	0.6	1.5	0.7	0.9	1.3	1.2	1.7	1.7	1.4	2.1	1.4	0.7	0.8	1.4	0.5	3	3.8	3.3	10.2
XZ009	申扎县	2019-12-23 21:00:00	0	0	0	0	0	0	0.1	0.1	0.3	0.5	0.4	0.5	0.6	0.6	1.5	0.8	0.9	1.3	1.2	1.7	1.7	1.4	2.1	1.4	0.7	0.8	1.4	0.5	3	3.7	3.3	10.2
XZ009	申扎县	2019-12-23 22:00:00	0	0	0	0	0	0	0.1	0.1	0.3	0.5	0.4	0.5	0.6	0.6	1.5	0.8	0.9	1.3	1.2	1.7	1.7	1.4	2.1	1.4	0.7	0.8	1.3	0.5	2.9	3.7	3.3	10.2
XZ009	申扎县	2019-12-23 23:00:00	0	0	0	0	0	0	0.1	0.1	0.3	0.5	0.4	0.5	0.6	0.6	1.5	0.8	0.9	1.3	1.2	1.7	1.7	1.4	2.1	1.4	0.7	0.8	1.3	0.5	2.9	3.7	3.3	10.2
XZ009	申扎县	2019-12-24 00:00:00	0	0	0	0	0	0	0.1	0.1	0.3	0.5	0.4	0.5	0.6	0.6	1.5	0.8	0.9	1.3	1.2	1.7	1.7	1.4	2.1	1.4	0.7	0.8	1.3	0.5	2.9	3.7	3.3	10.1
XZ009	申扎县	2019-12-24 01:00:00	0	0	0	0	0	0	0.1	0.1	0.3	0.5	0.4	0.5	0.6	0.6	1.6	0.8	0.9	1.3	1.2	1.7	1.7	1.4	2	1.4	0.7	0.8	1.3	0.4	2.9	3.7	3.2	10.1
XZ009	申扎县	2019-12-24 02:00:00	0	0	0	0	0	0	0.1	0	0.3	0.5	0.4	0.5	0.6	0.6	1.5	0.8	0.9	1.3	1.2	1.7	1.7	1.4	2.1	1.4	0.7	0.8	1.3	0.4	2.9	3.7	3.2	10.1
XZ009	申扎县	2019-12-24 03:00:00	0	0	0	0	0	0	0.1	0	0.3	0.5	0.4	0.5	0.6	0.6	1.5	0.8	0.9	1.3	1.2	1.7	1.7	1.4	2.1	1.4	0.7	0.8	1.3	0.4	2.9	3.7	3.2	10.1
XZ009	申扎县	2019-12-24 04:00:00	0	0	0	0	0	0	0.1	0	0.3	0.5	0.4	0.5	0.6	0.6	1.5	0.8	0.9	1.3	1.2	1.7	1.7	1.4	2.1	1.4	0.7	0.8	1.3	0.4	2.9	3.6	3.2	10.1
XZ009	申扎县	2019-12-24 05:00:00	0	0	0	0	0	0	0	0	0.3	0.4	0.4	0.5	0.6	0.6	1.5	0.8	0.9	1.3	1.2	1.7	1.7	1.4	2.1	1.4	0.7	0.8	1.3	0.4	2.9	3.6	3.2	10.1
XZ009	申扎县	2019-12-24 06:00:00	0	0	0	0	0	0	0	0	0.2	0.4	0.4	0.5	0.6	0.6	1.5	0.8	0.9	1.3	1.2	1.7	1.7	1.4	2	1.4	0.7	0.8	1.3	0.4	2.9	3.6	3.2	10
XZ009	申扎县	2019-12-24 07:00:00	0	0	0	0	0	0	0	0	0.2	0.4	0.4	0.5	0.5	0.6	1.5	0.8	0.9	1.3	1.2	1.7	1.7	1.4	2	1.4	0.7	0.8	1.3	0.4	2.8	3.6	3.2	10
XZ009	申扎县	2019-12-24 08:00:00	0	0	0	0	0	0	0	0	0.2	0.4	0.4	0.5	0.5	0.6	1.5	0.7	0.9	1.3	1.2	1.7	1.7	1.4	2	1.4	0.7	0.8	1.3	0.4	2.8	3.6	3.2	10
XZ009	申扎县	2019-12-24 09:00:00	0	0	0	0	0	0	0	0	0.2	0.4	0.3	0.5	0.5	0.6	1.5	0.7	0.9	1.3	1.2	1.7	1.7	1.4	2	1.4	0.7	0.8	1.3	0.4	2.8	3.6	3.1	10
XZ009	申扎县	2019-12-24 10:00:00	0	0	0	0	0	0	0	0	0.2	0.4	0.3	0.5	0.5	0.6	1.5	0.7	0.8	1.3	1.1	1.7	1.6	1.4	2	1.4	0.7	0.8	1.3	0.4	2.8	3.6	3.1	10
XZ009	申扎县	2019-12-24 11:00:00	0	0	0	0	0	0	0	0	0.2	0.3	0.3	0.4	0.5	0.6	1.5	0.7	0.8	1.3	1.1	1.7	1.7	1.3	2	1.4	0.7	0.8	1.3	0.4	2.8	3.6	3.1	10
XZ009	申扎县	2019-12-24 12:00:00	0	0	0	0	0	0	0	0	0.2	0.3	0.3	0.4	0.5	0.6	1.5	0.7	0.8	1.3	1.1	1.7	1.6	1.3	2	1.4	0.7	0.8	1.3	0.4	2.8	3.6	3.1	10
XZ009	申扎县	2019-12-24 13:00:00	0	0	0	0	0	0	0	0	0.2	0.3	0.3	0.4	0.5	0.6	1.5	0.7	0.8	1.3	1.1	1.7	1.6	1.3	2	1.4	0.7	0.8	1.3	0.4	2.8	3.5	3.1	10
XZ009	申扎县	2019-12-24 14:00:00	0	0	0	0	0	0	0	0	0.2	0.3	0.3	0.4	0.5	0.6	1.5	0.7	0.8	1.3	1.1	1.6	1.6	1.3	2	1.4	0.7	0.8	1.3	0.4	2.8	3.6	3.1	9.9
XZ009	申扎县	2019-12-24 15:00:00	0	0	0	0	0	0	0	0	0.2	0.3	0.3	0.4	0.5	0.6	1.5	0.7	0.8	1.3	1.1	1.6	1.6	1.3	2	1.4	0.7	0.8	1.3	0.4	2.8	3.5	3.1	9.9
XZ009	申扎县	2019-12-24 16:00:00	0	0	0	0	0	0	0.1	0	0.2	0.4	0.3	0.4	0.5	0.6	1.5	0.7	0.8	1.3	1.1	1.6	1.6	1.3	2	1.3	0.7	0.8	1.3	0.4	2.8	3.5	3.1	9.9
XZ009	申扎县	2019-12-24 17:00:00	0	0.1	0	0	0	0	0.1	0	0.2	0.4	0.3	0.4	0.5	0.6	1.5	0.7	0.8	1.3	1.1	1.6	1.6	1.3	2	1.3	0.7	0.8	1.3	0.4	2.8	3.5	3.1	9.9
XZ009	申扎县	2019-12-24 18:00:00	0	0	0	0	0	0	0.1	0	0.3	0.4	0.4	0.5	0.5	0.6	1.5	0.7	0.8	1.3	1.1	1.6	1.6	1.3	2	1.3	0.6	0.8	1.2	0.4	2.8	3.5	3.1	9.9
XZ009	申扎县	2019-12-24 19:00:00	0	0	0	0	0	0	0.1	0.1	0.3	0.4	0.4	0.5	0.5	0.6	1.5	0.7	0.8	1.3	1.1	1.6	1.6	1.3	2	1.3	0.6	0.8	1.2	0.4	2.8	3.5	3.1	9.9
XZ009	申扎县	2019-12-24 20:00:00	0	0	0	0	0	0	0.1	0.1	0.3	0.5	0.4	0.5	0.5	0.6	1.5	0.7	0.8	1.3	1.1	1.6	1.6	1.3	2	1.3	0.6	0.8	1.2	0.4	2.8	3.5	3.1	9.9
XZ009	申扎县	2019-12-24 21:00:00	0	0	0	0	0	0	0.1	0.1	0.3	0.5	0.4	0.5	0.5	0.6	1.5	0.7	0.8	1.3	1.1	1.6	1.6	1.3	2	1.3	0.6	0.8	1.3	0.4	2.7	3.5	3	9.8
XZ009	申扎县	2019-12-24 22:00:00	0	0	0	0	0	0	0.1	0.1	0.3	0.5	0.4	0.5	0.5	0.6	1.5	0.7	0.8	1.2	1.1	1.6	1.6	1.3	1.9	1.3	0.6	0.7	1.2	0.4	2.7	3.4	3	9.8
XZ009	申扎县	2019-12-24 23:00:00	0	0	0	0	0	0	0.1	0.1	0.3	0.5	0.4	0.5	0.6	0.6	1.5	0.7	0.8	1.3	1.1	1.6	1.6	1.3	1.9	1.3	0.6	0.8	1.2	0.4	2.7	3.4	3	9.8
XZ009	申扎县	2019-12-25 00:00:00	0	0	0	0	0	0	0.1	0.1	0.3	0.5	0.4	0.5	0.6	0.6	1.5	0.7	0.8	1.3	1.1	1.6	1.6	1.3	1.9	1.3	0.6	0.7	1.2	0.4	2.7	3.4	3	9.8
XZ009	申扎县	2019-12-25 01:00:00	0	0	0	0	0	0	0.1	0	0.3	0.5	0.4	0.5	0.6	0.6	1.5	0.7	0.8	1.3	1.1	1.6	1.6	1.3	1.9	1.3	0.6	0.7	1.2	0.4	2.7	3.4	3	9.8
XZ009	申扎县	2019-12-25 02:00:00	0	0	0	0	0	0	0.1	0	0.3	0.4	0.4	0.5	0.6	0.6	1.5	0.7	0.8	1.3	1.1	1.6	1.6	1.3	1.9	1.3	0.6	0.7	1.2	0.4	2.7	3.4	3	9.7
XZ009	申扎县	2019-12-25 03:00:00	0	0	0	0	0	0	0.1	0	0.3	0.4	0.4	0.5	0.6	0.6	1.5	0.7	0.8	1.3	1.1	1.6	1.6	1.3	1.9	1.3	0.6	0.7	1.2	0.4	2.7	3.4	3	9.7
XZ009	申扎县	2019-12-25 04:00:00	0	0	0	0	0	0	0.1	0	0.3	0.4	0.4	0.5	0.5	0.6	1.5	0.7	0.8	1.3	1.1	1.6	1.6	1.3	1.9	1.3	0.6	0.7	1.2	0.4	2.7	3.4	2.9	9.7
XZ009	申扎县	2019-12-25 05:00:00	0	0	0	0	0	0	0	0	0.2	0.4	0.4	0.5	0.5	0.6	1.5	0.7	0.8	1.3	1.1	1.6	1.6	1.3	1.9	1.3	0.6	0.7	1.2	0.4	2.7	3.4	3	9.7
XZ009	申扎县	2019-12-25 06:00:00	0	0	0	0	0	0	0	0	0.2	0.4	0.4	0.5	0.5	0.6	1.5	0.7	0.8	1.3	1.1	1.6	1.6	1.3	1.9	1.3	0.6	0.7	1.2	0.4	2.7	3.4	2.9	9.7
XZ009	申扎县	2019-12-25 07:00:00	0	0	0	0	0	0	0	0	0.2	0.4	0.4	0.5	0.5	0.6	1.5	0.7	0.8	1.3	1.1	1.6	1.6	1.3	1.9	1.3	0.6	0.7	1.2	0.4	2.7	3.3	2.9	9.7
XZ009	申扎县	2019-12-25 08:00:00	0	0	0	0	0	0	0	0	0.2	0.4	0.3	0.5	0.5	0.6	1.5	0.7	0.8	1.2	1.1	1.6	1.6	1.3	1.9	1.3	0.6	0.7	1.2	0.4	2.7	3.3	2.9	9.7
XZ009	申扎县	2019-12-25 09:00:00	0	0	0	0	0	0	0	0	0.2	0.4	0.3	0.4	0.5	0.6	1.5	0.7	0.8	1.2	1.1	1.6	1.6	1.3	1.9	1.3	0.6	0.7	1.2	0.4	2.7	3.3	2.9	9.6
XZ009	申扎县	2019-12-25 10:00:00	0	0	0	0	0	0	0	0	0.2	0.4	0.3	0.4	0.5	0.6	1.5	0.7	0.8	1.3	1.1	1.6	1.6	1.3	1.9	1.3	0.6	0.7	1.2	0.3	2.7	3.3	2.9	9.6
XZ009	申扎县	2019-12-25 11:00:00	0	0	0	0	0	0	0	0	0.2	0.3	0.3	0.4	0.5	0.6	1.5	0.7	0.8	1.3	1.1	1.6	1.6	1.3	1.9	1.3	0.6	0.7	1.2	0.4	2.6	3.3	2.9	9.6
XZ009	申扎县	2019-12-25 12:00:00	0	0	0	0	0	0	0	0	0.2	0.3	0.3	0.4	0.5	0.6	1.4	0.7	0.8	1.2	1.1	1.6	1.5	1.2	1.9	1.3	0.6	0.7	1.2	0.3	2.6	3.3	2.9	9.6
XZ009	申扎县	2019-12-25 13:00:00	0	0	0	0	0	0	0	0	0.2	0.3	0.3	0.4	0.5	0.6	1.4	0.7	0.8	1.2	1.1	1.6	1.5	1.3	1.9	1.3	0.6	0.7	1.2	0.3	2.6	3.3	2.9	9.6
XZ009	申扎县	2019-12-25 14:00:00	0	0	0	0	0	0	0	0	0.2	0.3	0.3	0.4	0.5	0.6	1.4	0.7	0.8	1.2	1.1	1.6	1.5	1.2	1.9	1.3	0.6	0.7	1.2	0.3	2.6	3.3	2.9	9.6
XZ009	申扎县	2019-12-25 15:00:00	0	0	0	0	0	0	0	0	0.2	0.3	0.3	0.4	0.5	0.6	1.4	0.7	0.8	1.2	1.1	1.5	1.5	1.2	1.9	1.3	0.6	0.7	1.2	0.3	2.6	3.3	2.9	9.6
XZ009	申扎县	2019-12-25 16:00:00	0	0	0	0	0	0	0.1	0	0.2	0.4	0.3	0.4	0.5	0.6	1.4	0.7	0.8	1.2	1.1	1.6	1.5	1.2	1.9	1.3	0.6	0.7	1.2	0.3	2.6	3.3	2.9	9.6
XZ009	申扎县	2019-12-25 17:00:00	0	0.1	0	0	0	0	0.1	0	0.3	0.4	0.3	0.4	0.5	0.6	1.4	0.7	0.8	1.2	1.1	1.5	1.5	1.2	1.9	1.2	0.6	0.7	1.1	0.3	2.6	3.3	2.8	9.6
XZ009	申扎县	2019-12-25 18:00:00	0	0.1	0	0	0	0	0.1	0	0.3	0.4	0.4	0.4	0.5	0.6	1.4	0.7	0.8	1.2	1.1	1.5	1.5	1.2	1.9	1.3	0.6	0.7	1.2	0.3	2.6	3.3	2.8	9.5
XZ009	申扎县	2019-12-25 19:00:00	0	0	0	0	0	0	0.1	0.1	0.3	0.4	0.4	0.5	0.5	0.6	1.5	0.7	0.8	1.2	1.1	1.5	1.5	1.2	1.9	1.2	0.6	0.7	1.1	0.3	2.6	3.3	2.8	9.5
XZ009	申扎县	2019-12-25 20:00:00	0	0	0	0	0	0	0.1	0.1	0.3	0.5	0.4	0.5	0.5	0.6	1.5	0.7	0.8	1.2	1.1	1.5	1.5	1.2	1.9	1.2	0.6	0.7	1.1	0.3	2.6	3.2	2.8	9.5
XZ009	申扎县	2019-12-25 21:00:00	0	0	0	0	0	0	0.1	0.1	0.3	0.5	0.4	0.5	0.5	0.6	1.5	0.7	0.8	1.2	1.1	1.5	1.5	1.2	1.9	1.2	0.6	0.7	1.1	0.3	2.6	3.2	2.8	9.5
XZ009	申扎县	2019-12-25 22:00:00	0	0	0	0	0	0	0.1	0.1	0.3	0.5	0.4	0.5	0.5	0.6	1.5	0.7	0.8	1.2	1.1	1.5	1.5	1.2	1.9	1.2	0.6	0.7	1.1	0.3	2.6	3.2	2.8	9.5
XZ009	申扎县	2019-12-25 23:00:00	0	0	0	0	0	0	0.1	0.1	0.3	0.5	0.4	0.5	0.5	0.6	1.5	0.7	0.8	1.2	1.1	1.5	1.5	1.2	1.9	1.2	0.6	0.7	1.1	0.3	2.6	3.2	2.8	9.5
XZ009	申扎县	2019-12-26 00:00:00	0	0	0	0	0	0	0.1	0.1	0.3	0.5	0.4	0.5	0.5	0.6	1.5	0.7	0.8	1.2	1.1	1.5	1.5	1.2	1.9	1.2	0.6	0.7	1.1	0.3	2.6	3.2	2.8	9.4
XZ009	申扎县	2019-12-26 01:00:00	0	0	0	0	0	0	0.1	0.1	0.3	0.5	0.4	0.5	0.5	0.6	1.5	0.7	0.8	1.2	1.1	1.5	1.5	1.2	1.9	1.2	0.6	0.7	1.1	0.3	2.6	3.2	2.8	9.4
XZ009	申扎县	2019-12-26 02:00:00	0	0	0	0	0	0	0.1	0	0.3	0.5	0.4	0.5	0.6	0.6	1.5	0.7	0.8	1.2	1.1	1.6	1.5	1.2	1.9	1.2	0.6	0.7	1.1	0.3	2.6	3.2	2.8	9.4
XZ009	申扎县	2019-12-26 03:00:00	0	0	0	0	0	0	0.1	0	0.3	0.4	0.4	0.5	0.6	0.6	1.5	0.7	0.8	1.2	1.1	1.5	1.5	1.2	1.9	1.2	0.6	0.7	1.1	0.3	2.6	3.2	2.8	9.4
XZ009	申扎县	2019-12-26 04:00:00	0	0	0	0	0	0	0.1	0	0.3	0.4	0.4	0.5	0.5	0.6	1.5	0.7	0.8	1.2	1.1	1.6	1.5	1.2	1.9	1.2	0.6	0.7	1.1	0.3	2.6	3.2	2.7	9.4
XZ009	申扎县	2019-12-26 05:00:00	0	0	0	0	0	0	0.1	0	0.3	0.4	0.4	0.5	0.5	0.6	1.5	0.7	0.8	1.2	1.1	1.6	1.5	1.2	1.9	1.2	0.6	0.7	1.1	0.3	2.5	3.1	2.8	9.4
XZ009	申扎县	2019-12-26 06:00:00	0	0	0	0	0	0	0	0	0.3	0.4	0.4	0.5	0.5	0.6	1.5	0.7	0.8	1.2	1.1	1.6	1.5	1.2	1.9	1.2	0.6	0.7	1.1	0.3	2.5	3.2	2.7	9.4
XZ009	申扎县	2019-12-26 07:00:00	0	0	0	0	0	0	0	0	0.2	0.4	0.4	0.5	0.5	0.6	1.5	0.7	0.8	1.2	1.1	1.6	1.5	1.2	1.9	1.2	0.6	0.7	1.1	0.3	2.5	3.1	2.7	9.3
XZ009	申扎县	2019-12-26 08:00:00	0	0	0	0	0	0	0	0	0.2	0.4	0.3	0.4	0.5	0.6	1.5	0.7	0.8	1.2	1.1	1.6	1.5	1.2	1.9	1.2	0.6	0.7	1.1	0.3	2.5	3.1	2.7	9.3
XZ009	申扎县	2019-12-26 09:00:00	0	0	0	0	0	0	0	0	0.2	0.4	0.3	0.4	0.5	0.6	1.5	0.7	0.8	1.2	1.1	1.6	1.5	1.2	1.9	1.2	0.6	0.7	1.1	0.3	2.5	3.1	2.7	9.3
XZ009	申扎县	2019-12-26 10:00:00	0	0	0	0	0	0	0	0	0.2	0.3	0.3	0.4	0.5	0.6	1.4	0.7	0.8	1.2	1.1	1.5	1.5	1.2	1.8	1.2	0.6	0.7	1.1	0.3	2.5	3.1	2.7	9.3
XZ009	申扎县	2019-12-26 11:00:00	0	0	0	0	0	0	0	0	0.2	0.3	0.3	0.4	0.5	0.6	1.4	0.7	0.8	1.2	1.1	1.5	1.5	1.2	1.8	1.2	0.6	0.7	1.1	0.3	2.5	3.1	2.7	9.3
XZ009	申扎县	2019-12-26 12:00:00	0	0	0	0	0	0	0	0	0.2	0.3	0.3	0.4	0.5	0.6	1.4	0.7	0.8	1.2	1	1.5	1.5	1.2	1.8	1.2	0.6	0.7	1.1	0.3	2.5	3.1	2.7	9.3
XZ009	申扎县	2019-12-26 13:00:00	0	0	0	0	0	0	0	0	0.2	0.3	0.3	0.4	0.5	0.6	1.4	0.7	0.8	1.2	1.1	1.5	1.5	1.2	1.8	1.2	0.6	0.7	1.1	0.3	2.5	3.1	2.7	9.3
XZ009	申扎县	2019-12-26 14:00:00	0	0	0	0	0	0	0	0	0.2	0.3	0.3	0.4	0.5	0.5	1.4	0.7	0.8	1.2	1.1	1.5	1.5	1.2	1.8	1.2	0.6	0.7	1.1	0.3	2.5	3.1	2.7	9.3
XZ009	申扎县	2019-12-26 15:00:00	0	0	0	0	0	0	0	0	0.2	0.3	0.3	0.4	0.5	0.5	1.4	0.7	0.8	1.2	1	1.5	1.5	1.2	1.8	1.2	0.6	0.7	1.1	0.3	2.5	3.1	2.7	9.3
XZ009	申扎县	2019-12-26 16:00:00	0	0	0	0	0	0	0	0	0.2	0.3	0.3	0.4	0.5	0.5	1.4	0.7	0.7	1.2	1	1.5	1.5	1.2	1.8	1.2	0.6	0.7	1.1	0.3	2.5	3.1	2.7	9.3
XZ009	申扎县	2019-12-26 17:00:00	0	0	0	0	0	0	0.1	0	0.2	0.4	0.3	0.4	0.5	0.5	1.4	0.6	0.7	1.2	1	1.5	1.5	1.2	1.8	1.2	0.6	0.7	1.1	0.3	2.5	3.1	2.7	9.3
XZ009	申扎县	2019-12-26 18:00:00	0	0	0	0	0	0	0.1	0	0.2	0.4	0.3	0.4	0.5	0.5	1.4	0.7	0.7	1.2	1	1.5	1.5	1.2	1.8	1.2	0.6	0.7	1.1	0.3	2.5	3.1	2.7	9.3
XZ009	申扎县	2019-12-26 19:00:00	0	0	0	0	0	0	0.1	0	0.3	0.4	0.3	0.4	0.5	0.5	1.4	0.6	0.7	1.2	1	1.5	1.5	1.2	1.8	1.2	0.6	0.7	1.1	0.3	2.5	3.1	2.7	9.3
XZ009	申扎县	2019-12-26 20:00:00	0	0	0	0	0	0	0.1	0	0.3	0.4	0.4	0.4	0.5	0.6	1.4	0.7	0.7	1.2	1	1.5	1.5	1.2	1.8	1.2	0.5	0.7	1.1	0.3	2.5	3.1	2.7	9.2
XZ009	申扎县	2019-12-26 21:00:00	0	0	0	0	0	0	0.1	0	0.3	0.4	0.4	0.5	0.5	0.6	1.4	0.7	0.7	1.2	1	1.5	1.5	1.2	1.8	1.2	0.6	0.6	1.1	0.3	2.5	3.1	2.7	9.2
XZ009	申扎县	2019-12-26 22:00:00	0	0	0	0	0	0	0.1	0	0.3	0.4	0.4	0.5	0.5	0.6	1.4	0.7	0.8	1.2	1	1.5	1.5	1.2	1.8	1.2	0.5	0.6	1.1	0.3	2.5	3.1	2.7	9.2
XZ009	申扎县	2019-12-26 23:00:00	0	0	0	0	0	0	0.1	0	0.3	0.4	0.4	0.5	0.5	0.6	1.4	0.7	0.8	1.2	1	1.5	1.5	1.2	1.8	1.2	0.5	0.6	1.1	0.3	2.5	3	2.6	9.2
XZ009	申扎县	2019-12-27 00:00:00	0	0	0	0	0	0	0.1	0	0.3	0.4	0.4	0.5	0.5	0.6	1.4	0.7	0.8	1.2	1	1.5	1.5	1.2	1.8	1.2	0.5	0.6	1	0.3	2.5	3	2.6	9.2
XZ009	申扎县	2019-12-27 01:00:00	0	0	0	0	0	0	0.1	0	0.3	0.4	0.4	0.5	0.5	0.6	1.4	0.7	0.8	1.2	1	1.5	1.5	1.2	1.8	1.2	0.5	0.6	1.1	0.3	2.5	3	2.6	9.2
XZ009	申扎县	2019-12-27 02:00:00	0	0	0	0	0	0	0.1	0	0.3	0.4	0.4	0.5	0.5	0.6	1.4	0.7	0.8	1.2	1	1.5	1.5	1.2	1.8	1.2	0.5	0.6	1.1	0.3	2.5	3	2.6	9.2
XZ009	申扎县	2019-12-27 03:00:00	0	0	0	0	0	0	0.1	0	0.2	0.4	0.4	0.5	0.5	0.6	1.4	0.7	0.8	1.2	1	1.5	1.5	1.2	1.8	1.2	0.5	0.6	1.1	0.3	2.5	3	2.6	9.2
XZ009	申扎县	2019-12-27 04:00:00	0	0	0	0	0	0	0	0	0.2	0.4	0.4	0.5	0.5	0.6	1.4	0.7	0.8	1.2	1	1.5	1.5	1.2	1.8	1.2	0.5	0.6	1.1	0.3	2.4	3	2.6	9.2
XZ009	申扎县	2019-12-27 05:00:00	0	0	0	0	0	0	0	0	0.2	0.4	0.3	0.4	0.5	0.6	1.4	0.7	0.8	1.2	1	1.5	1.5	1.2	1.8	1.2	0.5	0.6	1.1	0.3	2.4	3	2.6	9.1
XZ009	申扎县	2019-12-27 06:00:00	0	0	0	0	0	0	0	0	0.2	0.4	0.3	0.4	0.5	0.6	1.4	0.7	0.8	1.2	1	1.5	1.5	1.2	1.8	1.2	0.5	0.6	1.1	0.3	2.4	3	2.6	9.1
XZ009	申扎县	2019-12-27 07:00:00	0	0	0	0	0	0	0	0	0.2	0.4	0.3	0.4	0.5	0.6	1.4	0.7	0.8	1.2	1	1.5	1.5	1.2	1.8	1.2	0.5	0.6	1.1	0.3	2.4	3	2.6	9.1
XZ009	申扎县	2019-12-27 08:00:00	0	0	0	0	0	0	0	0	0.2	0.4	0.3	0.4	0.5	0.6	1.4	0.7	0.8	1.2	1	1.5	1.5	1.2	1.8	1.2	0.5	0.6	1.1	0.3	2.4	3	2.6	9.1
XZ009	申扎县	2019-12-27 09:00:00	0	0	0	0	0	0	0	0	0.2	0.4	0.3	0.4	0.5	0.6	1.4	0.7	0.8	1.2	1	1.5	1.5	1.2	1.8	1.2	0.5	0.6	1.1	0.3	2.4	3	2.5	9.1
XZ009	申扎县	2019-12-27 10:00:00	0	0	0	0	0	0	0	0	0.2	0.3	0.3	0.4	0.5	0.5	1.4	0.7	0.8	1.2	1	1.5	1.5	1.2	1.8	1.2	0.5	0.6	1.1	0.3	2.4	3	2.5	9.1
XZ009	申扎县	2019-12-27 11:00:00	0	0	0	0	0	0	0	0	0.2	0.3	0.3	0.4	0.5	0.5	1.4	0.7	0.7	1.2	1	1.5	1.5	1.2	1.8	1.2	0.5	0.6	1	0.3	2.4	2.9	2.5	9.1
XZ009	申扎县	2019-12-27 12:00:00	0	0	0	0	0	0	0	0	0.2	0.3	0.3	0.4	0.5	0.5	1.4	0.7	0.7	1.2	1	1.5	1.4	1.2	1.8	1.2	0.5	0.6	1.1	0.3	2.4	2.9	2.5	9.1
XZ009	申扎县	2019-12-27 13:00:00	0	0	0	0	0	0	0	0	0.2	0.3	0.3	0.4	0.5	0.5	1.4	0.6	0.7	1.2	1	1.5	1.4	1.2	1.8	1.2	0.5	0.6	1.1	0.3	2.4	2.9	2.5	9.1
XZ009	申扎县	2019-12-27 14:00:00	0	0	0	0	0	0	0	0	0.2	0.3	0.3	0.4	0.5	0.5	1.4	0.6	0.7	1.2	1	1.5	1.4	1.1	1.8	1.2	0.5	0.6	1.1	0.3	2.4	2.9	2.5	9.1
XZ009	申扎县	2019-12-27 15:00:00	0	0	0	0	0	0	0	0	0.2	0.3	0.3	0.4	0.5	0.5	1.4	0.6	0.7	1.2	1	1.4	1.4	1.1	1.8	1.2	0.5	0.6	1	0.3	2.4	2.9	2.5	9
XZ009	申扎县	2019-12-27 16:00:00	0	0	0	0	0	0	0	0	0.2	0.3	0.3	0.4	0.5	0.5	1.4	0.6	0.7	1.2	1	1.4	1.4	1.1	1.8	1.1	0.5	0.6	1	0.3	2.4	2.9	2.5	9
XZ009	申扎县	2019-12-27 17:00:00	0	0	0	0	0	0	0.1	0	0.2	0.4	0.3	0.4	0.5	0.5	1.4	0.6	0.7	1.2	1	1.4	1.4	1.2	1.8	1.1	0.5	0.6	1	0.3	2.4	2.9	2.5	9
XZ009	申扎县	2019-12-27 18:00:00	0	0	0	0	0	0	0.1	0	0.2	0.4	0.3	0.4	0.5	0.5	1.4	0.6	0.7	1.2	1	1.4	1.4	1.1	1.8	1.1	0.5	0.6	1	0.3	2.4	2.9	2.5	9
XZ009	申扎县	2019-12-27 19:00:00	0	0	0	0	0	0	0.1	0	0.3	0.4	0.3	0.4	0.5	0.5	1.4	0.6	0.7	1.2	1	1.4	1.4	1.1	1.8	1.1	0.5	0.6	1	0.3	2.4	2.9	2.5	9
XZ009	申扎县	2019-12-27 20:00:00	0	0	0	0	0	0	0.1	0	0.3	0.4	0.4	0.4	0.5	0.5	1.4	0.6	0.7	1.1	1	1.4	1.4	1.1	1.8	1.1	0.5	0.6	1	0.3	2.4	2.9	2.5	9
XZ009	申扎县	2019-12-27 21:00:00	0	0	0	0	0	0	0.1	0	0.3	0.4	0.4	0.4	0.5	0.6	1.4	0.6	0.7	1.1	1	1.4	1.4	1.1	1.7	1.1	0.5	0.6	1	0.2	2.4	2.9	2.5	9
XZ009	申扎县	2019-12-27 22:00:00	0	0	0	0	0	0	0.1	0	0.3	0.4	0.4	0.5	0.5	0.6	1.4	0.6	0.7	1.2	1	1.4	1.4	1.1	1.7	1.1	0.5	0.6	1	0.2	2.4	2.9	2.5	9
XZ009	申扎县	2019-12-27 23:00:00	0	0	0	0	0	0	0.1	0	0.3	0.4	0.4	0.5	0.5	0.6	1.4	0.7	0.7	1.1	1	1.4	1.4	1.1	1.7	1.1	0.5	0.6	1	0.2	2.4	2.9	2.5	9
XZ009	申扎县	2019-12-28 00:00:00	0	0	0	0	0	0	0.1	0	0.3	0.4	0.4	0.5	0.5	0.6	1.4	0.7	0.7	1.1	1	1.4	1.4	1.1	1.8	1.1	0.5	0.6	1	0.2	2.4	2.9	2.5	8.9
XZ009	申扎县	2019-12-28 01:00:00	0	0	0	0	0	0	0	0	0.2	0.4	0.4	0.4	0.5	0.6	1.4	0.7	0.7	1.1	1	1.4	1.4	1.1	1.7	1.1	0.5	0.6	1	0.2	2.4	2.9	2.5	9
XZ009	申扎县	2019-12-28 02:00:00	0	0	0	0	0	0	0	0	0.2	0.4	0.3	0.4	0.5	0.6	1.4	0.7	0.7	1.2	1	1.4	1.4	1.1	1.7	1.1	0.5	0.6	1	0.2	2.4	2.9	2.5	8.9
XZ009	申扎县	2019-12-28 03:00:00	0	0	0	0	0	0	0	0	0.2	0.4	0.3	0.4	0.5	0.6	1.4	0.7	0.7	1.1	1	1.4	1.4	1.1	1.8	1.2	0.5	0.6	1	0.2	2.4	2.8	2.5	8.9
XZ009	申扎县	2019-12-28 04:00:00	0	0	0	0	0	0	0	0	0.2	0.4	0.3	0.4	0.5	0.6	1.4	0.6	0.7	1.2	1	1.5	1.4	1.1	1.7	1.1	0.5	0.6	1	0.2	2.4	2.8	2.5	8.9
XZ009	申扎县	2019-12-28 05:00:00	0	0	0	0	0	0	0	0	0.2	0.3	0.3	0.4	0.5	0.5	1.4	0.6	0.7	1.1	1	1.4	1.4	1.1	1.7	1.1	0.5	0.6	1	0.2	2.4	2.8	2.4	8.9
XZ009	申扎县	2019-12-28 06:00:00	0	0	0	0	0	0	0	0	0.2	0.3	0.3	0.4	0.5	0.5	1.4	0.6	0.7	1.1	1	1.4	1.4	1.1	1.7	1.1	0.5	0.6	1	0.2	2.4	2.8	2.5	8.9
XZ009	申扎县	2019-12-28 07:00:00	0	0	0	0	0	0	0	0	0.2	0.3	0.3	0.4	0.5	0.5	1.4	0.6	0.7	1.1	1	1.4	1.4	1.1	1.8	1.1	0.5	0.6	1	0.2	2.4	2.8	2.4	8.9
XZ009	申扎县	2019-12-28 08:00:00	0	0	0	0	0	0	0	0	0.2	0.3	0.3	0.4	0.5	0.5	1.4	0.6	0.7	1.1	1	1.4	1.4	1.1	1.7	1.1	0.5	0.6	1	0.2	2.4	2.8	2.4	8.9
XZ009	申扎县	2019-12-28 09:00:00	0	0	0	0	0	0	0	0	0.2	0.3	0.3	0.4	0.4	0.5	1.4	0.6	0.7	1.1	1	1.4	1.4	1.1	1.7	1.1	0.5	0.6	1	0.2	2.3	2.8	2.4	8.9
XZ009	申扎县	2019-12-28 10:00:00	0	0	0	0	0	0	0	0	0.1	0.3	0.3	0.4	0.4	0.5	1.4	0.6	0.7	1.2	1	1.4	1.4	1.1	1.7	1.1	0.5	0.6	1	0.2	2.3	2.8	2.4	8.9
XZ009	申扎县	2019-12-28 11:00:00	0	0	0	0	0	0	0	0	0.1	0.3	0.3	0.4	0.4	0.5	1.4	0.6	0.7	1.1	1	1.4	1.4	1.1	1.7	1.1	0.5	0.6	1	0.2	2.3	2.8	2.4	8.9
XZ009	申扎县	2019-12-28 12:00:00	0	0	0	0	0	0	0	0	0.1	0.3	0.3	0.4	0.4	0.5	1.4	0.6	0.7	1.1	1	1.4	1.4	1.1	1.7	1.1	0.5	0.6	1	0.2	2.4	2.8	2.4	8.9
XZ009	申扎县	2019-12-28 13:00:00	0	0	0	0	0	0	0	0	0.1	0.3	0.3	0.4	0.4	0.5	1.3	0.6	0.7	1.1	1	1.4	1.4	1.1	1.7	1.1	0.5	0.6	1	0.2	2.3	2.8	2.4	8.9
XZ009	申扎县	2019-12-28 14:00:00	0	0	0	0	0	0	0	0	0.1	0.3	0.3	0.4	0.4	0.5	1.4	0.6	0.7	1.1	1	1.4	1.4	1.1	1.7	1.1	0.5	0.6	1	0.2	2.3	2.8	2.4	8.8
XZ009	申扎县	2019-12-28 15:00:00	0	0	0	0	0	0	0	0	0.2	0.3	0.3	0.4	0.4	0.5	1.3	0.6	0.7	1.1	1	1.4	1.4	1.1	1.7	1.1	0.5	0.6	1	0.2	2.3	2.8	2.4	8.8
XZ009	申扎县	2019-12-28 16:00:00	0	0	0	0	0	0	0	0	0.2	0.3	0.3	0.4	0.4	0.5	1.3	0.6	0.7	1.1	1	1.4	1.4	1.1	1.7	1.1	0.5	0.6	1	0.2	2.4	2.8	2.4	8.8
XZ009	申扎县	2019-12-28 17:00:00	0	0	0	0	0	0	0	0	0.2	0.3	0.3	0.4	0.4	0.5	1.3	0.6	0.7	1.1	1	1.4	1.4	1.1	1.7	1.1	0.5	0.6	1	0.2	2.3	2.8	2.4	8.8
XZ009	申扎县	2019-12-28 18:00:00	0	0	0	0	0	0	0.1	0	0.2	0.3	0.3	0.4	0.4	0.5	1.4	0.6	0.7	1.1	1	1.4	1.4	1.1	1.7	1.1	0.5	0.6	1	0.2	2.3	2.8	2.4	8.8
XZ009	申扎县	2019-12-28 19:00:00	0	0	0	0	0	0	0.1	0	0.3	0.4	0.3	0.4	0.4	0.5	1.4	0.6	0.7	1.1	1	1.3	1.4	1.1	1.7	1.1	0.5	0.6	1	0.2	2.3	2.8	2.4	8.8
XZ009	申扎县	2019-12-28 20:00:00	0	0	0	0	0	0	0.1	0	0.3	0.4	0.3	0.4	0.5	0.5	1.4	0.6	0.7	1.1	1	1.3	1.4	1.1	1.7	1.1	0.5	0.6	1	0.2	2.3	2.8	2.4	8.8
XZ009	申扎县	2019-12-28 21:00:00	0	0	0	0	0	0	0.1	0	0.3	0.4	0.3	0.4	0.5	0.5	1.4	0.6	0.7	1.1	1	1.4	1.4	1.1	1.7	1.1	0.5	0.6	1	0.2	2.3	2.8	2.4	8.8
XZ009	申扎县	2019-12-28 22:00:00	0	0	0	0	0	0	0.1	0	0.3	0.4	0.3	0.4	0.5	0.5	1.4	0.6	0.7	1.1	1	1.4	1.4	1.1	1.7	1.1	0.5	0.6	1	0.2	2.3	2.8	2.4	8.8
XZ009	申扎县	2019-12-28 23:00:00	0	0	0	0	0	0	0.1	0	0.3	0.4	0.3	0.4	0.5	0.5	1.4	0.6	0.7	1.1	1	1.4	1.4	1.1	1.7	1.1	0.5	0.6	1	0.2	2.3	2.8	2.4	8.8
XZ009	申扎县	2019-12-29 00:00:00	0	0	0	0	0	0	0.1	0	0.3	0.4	0.3	0.4	0.5	0.5	1.4	0.6	0.7	1.1	1	1.4	1.4	1.1	1.7	1.1	0.5	0.6	1	0.2	2.3	2.7	2.3	8.7
XZ009	申扎县	2019-12-29 01:00:00	0	0	0	0	0	0	0	0	0.2	0.4	0.3	0.4	0.5	0.5	1.4	0.6	0.7	1.1	1	1.4	1.4	1.1	1.7	1.1	0.5	0.6	1	0.2	2.3	2.7	2.3	8.7
XZ009	申扎县	2019-12-29 02:00:00	0	0	0	0	0	0	0	0	0.2	0.4	0.3	0.4	0.5	0.5	1.4	0.6	0.7	1.1	1	1.4	1.4	1.1	1.7	1.1	0.5	0.6	1	0.2	2.3	2.7	2.3	8.8
XZ009	申扎县	2019-12-29 03:00:00	0	0	0	0	0	0	0	0	0.2	0.4	0.3	0.4	0.5	0.5	1.4	0.6	0.7	1.1	1	1.4	1.4	1.1	1.7	1.1	0.5	0.6	1	0.2	2.3	2.7	2.3	8.7
XZ009	申扎县	2019-12-29 04:00:00	0	0	0	0	0	0	0	0	0.2	0.4	0.3	0.4	0.5	0.5	1.4	0.6	0.7	1.1	1	1.4	1.4	1.1	1.7	1.1	0.5	0.6	1	0.2	2.3	2.7	2.3	8.7
XZ009	申扎县	2019-12-29 05:00:00	0	0	0	0	0	0	0	0	0.2	0.3	0.3	0.4	0.5	0.5	1.4	0.6	0.7	1.1	1	1.4	1.4	1.1	1.7	1.1	0.5	0.6	0.9	0.2	2.3	2.7	2.3	8.7
XZ009	申扎县	2019-12-29 06:00:00	0	0	0	0	0	0	0	0	0.2	0.3	0.3	0.4	0.4	0.5	1.4	0.6	0.7	1.1	1	1.4	1.4	1.1	1.7	1.1	0.5	0.6	1	0.2	2.3	2.7	2.3	8.7
XZ009	申扎县	2019-12-29 07:00:00	0	0	0	0	0	0	0	0	0.2	0.3	0.3	0.4	0.4	0.5	1.4	0.6	0.7	1.1	1	1.4	1.4	1.1	1.7	1.1	0.5	0.6	0.9	0.2	2.3	2.7	2.3	8.7
XZ009	申扎县	2019-12-29 08:00:00	0	0	0	0	0	0	0	0	0.2	0.3	0.3	0.4	0.4	0.5	1.4	0.6	0.7	1.1	1	1.4	1.4	1.1	1.7	1.1	0.5	0.6	1	0.2	2.3	2.7	2.3	8.7
XZ009	申扎县	2019-12-29 09:00:00	0	0	0	0	0	0	0	0	0.1	0.3	0.3	0.4	0.4	0.5	1.3	0.6	0.7	1.1	1	1.4	1.4	1.1	1.7	1.1	0.5	0.6	0.9	0.2	2.3	2.7	2.3	8.7
XZ009	申扎县	2019-12-29 10:00:00	0	0	0	0	0	0	0	0	0.1	0.3	0.3	0.4	0.4	0.5	1.3	0.6	0.7	1.1	1	1.3	1.3	1.1	1.6	1.1	0.5	0.6	0.9	0.2	2.3	2.7	2.3	8.7
XZ009	申扎县	2019-12-29 11:00:00	0	0	0	0	0	0	0	0	0.1	0.2	0.3	0.4	0.4	0.5	1.3	0.6	0.7	1.1	0.9	1.4	1.4	1.1	1.7	1.1	0.5	0.6	0.9	0.2	2.2	2.7	2.3	8.7
XZ009	申扎县	2019-12-29 12:00:00	0	0	0	0	0	0	0	0	0.1	0.2	0.3	0.4	0.4	0.5	1.3	0.6	0.7	1.1	0.9	1.3	1.3	1.1	1.7	1.1	0.5	0.6	1	0.2	2.3	2.7	2.3	8.7
XZ009	申扎县	2019-12-29 13:00:00	0	0	0	0	0	0	0	0	0.1	0.2	0.2	0.3	0.4	0.5	1.3	0.6	0.7	1.1	0.9	1.3	1.3	1	1.7	1.1	0.5	0.6	1	0.2	2.3	2.7	2.3	8.6
XZ009	申扎县	2019-12-29 14:00:00	0	0	0	0	0	0	0	0	0.1	0.2	0.2	0.3	0.4	0.5	1.3	0.6	0.7	1.1	0.9	1.3	1.4	1	1.6	1.1	0.5	0.6	0.9	0.2	2.3	2.7	2.3	8.6
XZ009	申扎县	2019-12-29 15:00:00	0	0	0	0	0	0	0	0	0.1	0.3	0.3	0.3	0.4	0.5	1.3	0.6	0.7	1.1	0.9	1.3	1.3	1	1.6	1.1	0.5	0.6	0.9	0.2	2.2	2.7	2.3	8.6
XZ009	申扎县	2019-12-29 16:00:00	0	0	0	0	0	0	0	0	0.2	0.3	0.3	0.3	0.4	0.5	1.3	0.6	0.7	1.1	0.9	1.3	1.3	1	1.6	1	0.5	0.6	0.9	0.2	2.3	2.7	2.3	8.6
XZ009	申扎县	2019-12-29 17:00:00	0	0	0	0	0	0	0	0	0.2	0.3	0.3	0.4	0.4	0.5	1.3	0.6	0.7	1.1	0.9	1.3	1.3	1	1.6	1	0.5	0.6	0.9	0.2	2.2	2.7	2.3	8.6
XZ009	申扎县	2019-12-29 18:00:00	0	0	0	0	0	0	0.1	0	0.2	0.3	0.3	0.4	0.4	0.5	1.3	0.6	0.6	1.1	0.9	1.3	1.3	1	1.6	1	0.5	0.6	0.9	0.2	2.3	2.7	2.3	8.6
XZ009	申扎县	2019-12-29 19:00:00	0	0	0	0	0	0	0.1	0	0.2	0.3	0.3	0.4	0.4	0.5	1.3	0.5	0.7	1.1	0.9	1.3	1.3	1	1.6	1	0.5	0.6	0.9	0.2	2.2	2.6	2.3	8.6
XZ009	申扎县	2019-12-29 20:00:00	0	0	0	0	0	0	0.1	0	0.3	0.4	0.3	0.4	0.4	0.5	1.3	0.6	0.7	1	0.9	1.3	1.3	1	1.6	1	0.5	0.6	0.9	0.2	2.2	2.6	2.2	8.6
XZ009	申扎县	2019-12-29 21:00:00	0	0	0	0	0	0	0.1	0	0.3	0.4	0.3	0.4	0.5	0.5	1.3	0.6	0.7	1.1	0.9	1.3	1.3	1	1.6	1	0.4	0.6	0.9	0.2	2.2	2.6	2.2	8.6
XZ009	申扎县	2019-12-29 22:00:00	0	0	0	0	0	0	0.1	0	0.3	0.4	0.3	0.4	0.5	0.5	1.3	0.6	0.7	1.1	0.9	1.3	1.3	1	1.6	1	0.5	0.6	0.9	0.2	2.2	2.6	2.2	8.6
XZ009	申扎县	2019-12-29 23:00:00	0	0	0	0	0	0	0.1	0	0.3	0.4	0.3	0.4	0.5	0.5	1.3	0.6	0.7	1.1	0.9	1.3	1.3	1	1.6	1	0.5	0.6	0.9	0.2	2.2	2.6	2.2	8.6
XZ009	申扎县	2019-12-30 00:00:00	0	0	0	0	0	0	0.1	0	0.3	0.4	0.3	0.4	0.5	0.5	1.3	0.6	0.7	1.1	0.9	1.3	1.3	1	1.6	1	0.5	0.6	0.9	0.2	2.2	2.6	2.2	8.6
XZ009	申扎县	2019-12-30 01:00:00	0	0	0	0	0	0	0.1	0	0.3	0.4	0.3	0.4	0.5	0.5	1.4	0.6	0.7	1.1	0.9	1.3	1.3	1	1.6	1	0.5	0.6	0.9	0.2	2.2	2.6	2.2	8.5
XZ009	申扎县	2019-12-30 02:00:00	0	0	0	0	0	0	0.1	0	0.2	0.4	0.3	0.4	0.5	0.5	1.4	0.6	0.7	1.1	0.9	1.3	1.3	1	1.6	1	0.5	0.6	0.9	0.2	2.2	2.6	2.2	8.5
XZ009	申扎县	2019-12-30 03:00:00	0	0	0	0	0	0	0	0	0.2	0.4	0.3	0.4	0.5	0.5	1.4	0.6	0.7	1.1	0.9	1.3	1.3	1	1.6	1	0.5	0.6	0.9	0.2	2.2	2.6	2.2	8.5
XZ009	申扎县	2019-12-30 04:00:00	0	0	0	0	0	0	0	0	0.2	0.4	0.3	0.4	0.5	0.5	1.4	0.6	0.7	1.1	0.9	1.3	1.3	1	1.6	1	0.5	0.6	0.9	0.2	2.2	2.6	2.2	8.5
XZ009	申扎县	2019-12-30 05:00:00	0	0	0	0	0	0	0	0	0.2	0.4	0.3	0.4	0.5	0.5	1.4	0.6	0.7	1.1	0.9	1.3	1.3	1	1.6	1	0.5	0.6	0.9	0.2	2.2	2.6	2.2	8.5
XZ009	申扎县	2019-12-30 06:00:00	0	0	0	0	0	0	0	0	0.2	0.3	0.3	0.4	0.4	0.5	1.4	0.6	0.7	1.1	0.9	1.3	1.3	1	1.6	1	0.5	0.6	0.9	0.2	2.2	2.6	2.2	8.5
XZ009	申扎县	2019-12-30 07:00:00	0	0	0	0	0	0	0	0	0.2	0.3	0.3	0.4	0.4	0.5	1.3	0.6	0.7	1.1	1	1.3	1.3	1	1.6	1	0.5	0.6	0.9	0.2	2.2	2.6	2.2	8.5
XZ009	申扎县	2019-12-30 08:00:00	0	0	0	0	0	0	0	0	0.2	0.3	0.3	0.4	0.4	0.5	1.3	0.6	0.7	1.1	0.9	1.3	1.3	1	1.6	1	0.5	0.6	0.9	0.2	2.2	2.6	2.2	8.5
XZ009	申扎县	2019-12-30 09:00:00	0	0	0	0	0	0	0	0	0.1	0.3	0.3	0.4	0.4	0.5	1.3	0.6	0.7	1.1	0.9	1.3	1.3	1	1.6	1	0.5	0.6	0.9	0.2	2.2	2.6	2.2	8.5
XZ009	申扎县	2019-12-30 10:00:00	0	0	0	0	0	0	0	0	0.1	0.3	0.3	0.4	0.4	0.5	1.3	0.6	0.7	1.1	0.9	1.3	1.3	1	1.6	1	0.4	0.6	0.9	0.2	2.2	2.6	2.2	8.5
XZ009	申扎县	2019-12-30 11:00:00	0	0	0	0	0	0	0	0	0.1	0.3	0.3	0.4	0.4	0.5	1.3	0.6	0.7	1.1	0.9	1.3	1.3	1	1.6	1	0.5	0.6	0.9	0.2	2.2	2.6	2.2	8.5
XZ009	申扎县	2019-12-30 12:00:00	0	0	0	0	0	0	0	0	0.1	0.2	0.3	0.4	0.4	0.5	1.3	0.6	0.7	1.1	0.9	1.3	1.3	1	1.6	1	0.5	0.6	0.9	0.2	2.2	2.5	2.2	8.5
XZ009	申扎县	2019-12-30 13:00:00	0	0	0	0	0	0	0	0	0.1	0.2	0.3	0.3	0.4	0.5	1.3	0.6	0.7	1.1	0.9	1.3	1.3	1	1.6	1	0.5	0.6	0.9	0.2	2.2	2.6	2.2	8.5
XZ009	申扎县	2019-12-30 14:00:00	0	0	0	0	0	0	0	0	0.1	0.2	0.2	0.3	0.4	0.5	1.3	0.6	0.6	1.1	0.9	1.3	1.3	1	1.6	1	0.4	0.6	0.9	0.2	2.2	2.6	2.2	8.5
XZ009	申扎县	2019-12-30 15:00:00	0	0	0	0	0	0	0	0	0.1	0.3	0.3	0.3	0.4	0.5	1.3	0.6	0.7	1.1	0.9	1.3	1.3	1	1.6	1	0.5	0.6	0.9	0.2	2.2	2.6	2.2	8.5
XZ009	申扎县	2019-12-30 16:00:00	0	0	0	0	0	0	0	0	0.2	0.3	0.3	0.3	0.4	0.5	1.3	0.6	0.6	1.1	0.9	1.3	1.3	1	1.6	1	0.4	0.6	0.9	0.2	2.2	2.5	2.2	8.5
XZ009	申扎县	2019-12-30 17:00:00	0	0	0	0	0	0	0	0	0.2	0.3	0.3	0.4	0.4	0.5	1.3	0.6	0.6	1	0.9	1.3	1.3	1	1.6	1	0.4	0.6	0.9	0.1	2.2	2.6	2.2	8.5
XZ009	申扎县	2019-12-30 18:00:00	0	0	0	0	0	0	0.1	0	0.2	0.3	0.3	0.4	0.4	0.5	1.3	0.6	0.6	1	0.9	1.3	1.3	1	1.6	1	0.4	0.6	0.9	0.1	2.2	2.5	2.1	8.5
XZ009	申扎县	2019-12-30 19:00:00	0	0	0	0	0	0	0.1	0	0.2	0.3	0.3	0.4	0.4	0.5	1.3	0.6	0.6	1	0.9	1.3	1.3	1	1.6	1	0.4	0.6	0.9	0.2	2.2	2.5	2.1	8.5
XZ009	申扎县	2019-12-30 20:00:00	0	0	0	0	0	0	0.1	0	0.3	0.4	0.3	0.4	0.4	0.5	1.3	0.6	0.6	1	0.9	1.3	1.3	1	1.6	1	0.4	0.5	0.9	0.1	2.2	2.5	2.2	8.4
XZ009	申扎县	2019-12-30 21:00:00	0	0	0	0	0	0	0.1	0	0.3	0.4	0.3	0.4	0.4	0.5	1.3	0.6	0.7	1	0.9	1.3	1.3	1	1.6	1	0.4	0.5	0.9	0.1	2.2	2.5	2.1	8.4
XZ009	申扎县	2019-12-30 22:00:00	0	0	0	0	0	0	0.1	0	0.3	0.4	0.3	0.4	0.4	0.5	1.3	0.6	0.7	1	0.9	1.3	1.3	1	1.6	1	0.4	0.6	0.9	0.1	2.2	2.5	2.1	8.4
XZ009	申扎县	2019-12-30 23:00:00	0	0	0	0	0	0	0.1	0	0.3	0.4	0.3	0.4	0.5	0.5	1.3	0.6	0.7	1	0.9	1.3	1.3	1	1.6	1	0.4	0.5	0.9	0.1	2.2	2.5	2.1	8.4
XZ009	申扎县	2019-12-31 00:00:00	0	0	0	0	0	0	0.1	0	0.3	0.4	0.3	0.4	0.5	0.5	1.3	0.6	0.7	1.1	0.9	1.3	1.3	1	1.6	1	0.4	0.5	0.9	0.1	2.2	2.5	2.1	8.4
XZ009	申扎县	2019-12-31 01:00:00	0	0	0	0	0	0	0.1	0	0.2	0.4	0.3	0.4	0.5	0.5	1.3	0.6	0.7	1	0.9	1.3	1.3	1	1.6	1	0.4	0.6	0.9	0.1	2.2	2.5	2.1	8.4
XZ009	申扎县	2019-12-31 02:00:00	0	0	0	0	0	0	0	0	0.2	0.4	0.3	0.4	0.5	0.5	1.3	0.6	0.7	1	0.9	1.3	1.3	1	1.6	1	0.4	0.5	0.9	0.1	2.2	2.5	2.1	8.4
XZ009	申扎县	2019-12-31 03:00:00	0	0	0	0	0	0	0	0	0.2	0.4	0.3	0.4	0.5	0.5	1.3	0.6	0.7	1.1	0.9	1.3	1.3	1	1.6	1	0.4	0.5	0.9	0.1	2.2	2.5	2.1	8.4
XZ009	申扎县	2019-12-31 04:00:00	0	0	0	0	0	0	0	0	0.2	0.4	0.3	0.4	0.5	0.5	1.3	0.6	0.7	1	0.9	1.3	1.3	1	1.6	1	0.4	0.5	0.9	0.1	2.1	2.5	2.1	8.4
XZ009	申扎县	2019-12-31 05:00:00	0	0	0	0	0	0	0	0	0.2	0.3	0.3	0.4	0.5	0.5	1.3	0.6	0.7	1.1	0.9	1.3	1.3	1	1.6	1	0.4	0.5	0.9	0.1	2.1	2.5	2.1	8.4
XZ009	申扎县	2019-12-31 06:00:00	0	0	0	0	0	0	0	0	0.2	0.3	0.3	0.4	0.4	0.5	1.3	0.6	0.7	1.1	0.9	1.3	1.3	1	1.6	1	0.4	0.5	0.9	0.1	2.2	2.5	2.1	8.4
XZ009	申扎县	2019-12-31 07:00:00	0	0	0	0	0	0	0	0	0.2	0.3	0.3	0.4	0.4	0.5	1.3	0.6	0.7	1	0.9	1.3	1.3	1	1.6	1	0.4	0.5	0.9	0.1	2.1	2.5	2.1	8.4
XZ009	申扎县	2019-12-31 08:00:00	0	0	0	0	0	0	0	0	0.2	0.3	0.3	0.4	0.4	0.5	1.3	0.6	0.7	1	0.9	1.3	1.3	1	1.6	1	0.4	0.5	0.9	0.1	2.1	2.5	2.1	8.4
XZ009	申扎县	2019-12-31 09:00:00	0	0	0	0	0	0	0	0	0.2	0.3	0.3	0.4	0.4	0.5	1.3	0.6	0.7	1	0.9	1.3	1.3	1	1.6	1	0.4	0.6	0.9	0.1	2.2	2.5	2.1	8.4
XZ009	申扎县	2019-12-31 10:00:00	0	0	0	0	0	0	0	0	0.2	0.3	0.3	0.4	0.4	0.5	1.3	0.6	0.7	1.1	0.9	1.3	1.3	1	1.6	1	0.4	0.5	0.9	0.1	2.1	2.5	2.1	8.4
XZ009	申扎县	2019-12-31 11:00:00	0	0	0	0	0	0	0	0	0.1	0.3	0.3	0.4	0.4	0.5	1.3	0.6	0.6	1.1	0.9	1.3	1.3	1	1.6	1	0.4	0.6	0.9	0.1	2.2	2.5	2.1	8.4
XZ009	申扎县	2019-12-31 12:00:00	0	0	0	0	0	0	0	0	0.1	0.3	0.3	0.4	0.4	0.5	1.3	0.6	0.7	1.1	0.9	1.3	1.3	1	1.6	1	0.4	0.5	0.9	0.1	2.1	2.5	2.1	8.4
XZ009	申扎县	2019-12-31 13:00:00	0	0	0	0	0	0	0	0	0.1	0.3	0.3	0.4	0.4	0.5	1.3	0.6	0.7	1	0.9	1.3	1.3	1	1.6	1	0.4	0.6	0.9	0.1	2.1	2.5	2.1	8.4
XZ009	申扎县	2019-12-31 14:00:00	0	0	0	0	0	0	0	0	0.2	0.3	0.3	0.4	0.4	0.5	1.3	0.6	0.7	1.1	0.9	1.3	1.3	1	1.6	1	0.4	0.6	0.9	0.1	2.1	2.5	2.1	8.4
XZ009	申扎县	2019-12-31 15:00:00	0	0	0	0	0	0	0	0	0.2	0.3	0.3	0.3	0.4	0.5	1.3	0.6	0.6	1	0.9	1.3	1.3	1	1.6	1	0.4	0.5	0.9	0.1	2.1	2.5	2.1	8.4
XZ009	申扎县	2019-12-31 16:00:00	0	0	0	0	0	0	0	0	0.2	0.3	0.3	0.4	0.4	0.5	1.3	0.6	0.6	1	0.9	1.3	1.3	1	1.6	1	0.4	0.5	0.9	0.1	2.2	2.5	2.1	8.4
XZ009	申扎县	2019-12-31 17:00:00	0	0	0	0	0	0	0.1	0	0.2	0.3	0.3	0.4	0.4	0.5	1.3	0.6	0.6	1	0.9	1.3	1.3	1	1.6	1	0.4	0.5	0.9	0.1	2.1	2.5	2.1	8.3
XZ009	申扎县	2019-12-31 18:00:00	0	0	0	0	0	0	0.1	0	0.2	0.3	0.3	0.4	0.4	0.5	1.3	0.6	0.6	1	0.9	1.2	1.3	1	1.6	1	0.4	0.5	0.9	0.1	2.2	2.5	2.1	8.3
XZ009	申扎县	2019-12-31 19:00:00	0	0	0	0	0	0	0.1	0	0.3	0.4	0.3	0.4	0.4	0.5	1.3	0.6	0.6	1	0.9	1.3	1.3	1	1.6	1	0.4	0.5	0.9	0.1	2.1	2.5	2.1	8.3
XZ009	申扎县	2019-12-31 20:00:00	0	0	0	0	0	0	0.1	0	0.3	0.4	0.3	0.4	0.4	0.5	1.3	0.6	0.6	1	0.9	1.3	1.3	1	1.6	1	0.4	0.5	0.9	0.1	2.1	2.5	2.1	8.3
XZ009	申扎县	2019-12-31 21:00:00	0	0	0	0	0	0	0.1	0	0.3	0.4	0.3	0.4	0.5	0.5	1.3	0.6	0.7	1	0.9	1.3	1.3	1	1.6	1	0.4	0.5	0.9	0.1	2.1	2.5	2.1	8.3
XZ009	申扎县	2019-12-31 22:00:00	0	0	0	0	0	0	0.1	0	0.3	0.4	0.3	0.4	0.5	0.5	1.3	0.6	0.7	1	0.9	1.3	1.3	1	1.6	1	0.4	0.5	0.9	0.1	2.1	2.5	2.1	8.3
XZ009	申扎县	2019-12-31 23:00:00	0	0	0	0	0	0	0.1	0	0.3	0.4	0.3	0.4	0.5	0.5	1.4	0.6	0.7	1	0.9	1.3	1.3	1	1.6	1	0.4	0.5	0.8	0.1	2.1	2.5	2.1	8.3
XZ009	申扎县	2020-01-01 00:00:00	0	0	0	0	0	0	0.1	0	0.3	0.4	0.3	0.4	0.5	0.5	1.4	0.6	0.7	1.1	0.9	1.3	1.3	1	1.6	1	0.4	0.5	0.9	0.1	2.1	2.5	2	8.3
XZ009	申扎县	2020-01-01 01:00:00	0	0	0	0	0	0	0.1	0	0.3	0.4	0.4	0.4	0.5	0.5	1.4	0.6	0.7	1	0.9	1.3	1.3	1	1.6	1	0.4	0.6	0.9	0.1	2.1	2.5	2	8.3
XZ009	申扎县	2020-01-01 02:00:00	0	0	0	0	0	0	0.1	0	0.3	0.4	0.3	0.4	0.5	0.5	1.4	0.6	0.7	1.1	0.9	1.3	1.3	1	1.6	1	0.4	0.5	0.9	0.1	2.1	2.5	2	8.3
XZ009	申扎县	2020-01-01 03:00:00	0	0	0	0	0	0	0.1	0	0.3	0.4	0.3	0.4	0.5	0.5	1.4	0.6	0.7	1.1	0.9	1.3	1.3	1	1.6	1	0.4	0.5	0.9	0.1	2.1	2.5	2	8.3
XZ009	申扎县	2020-01-01 04:00:00	0	0	0	0	0	0	0.1	0	0.3	0.4	0.3	0.4	0.5	0.5	1.4	0.6	0.7	1	0.9	1.3	1.3	1	1.6	1	0.4	0.5	0.9	0.1	2.1	2.4	2	8.3
XZ009	申扎县	2020-01-01 05:00:00	0	0	0	0	0	0	0	0	0.2	0.4	0.3	0.4	0.5	0.5	1.4	0.6	0.7	1.1	0.9	1.3	1.3	1	1.6	1	0.4	0.5	0.9	0.1	2.1	2.4	2	8.3
XZ009	申扎县	2020-01-01 06:00:00	0	0	0	0	0	0	0	0	0.2	0.4	0.3	0.4	0.5	0.5	1.4	0.6	0.7	1.1	0.9	1.3	1.3	1	1.6	1	0.4	0.5	0.9	0.1	2.1	2.4	2	8.3
XZ009	申扎县	2020-01-01 07:00:00	0	0	0	0	0	0	0	0	0.2	0.4	0.3	0.4	0.5	0.5	1.4	0.6	0.7	1.1	0.9	1.3	1.3	1	1.6	1	0.4	0.5	0.8	0.1	2.1	2.4	2	8.3
XZ009	申扎县	2020-01-01 08:00:00	0	0	0	0	0	0	0	0	0.2	0.4	0.3	0.4	0.5	0.5	1.4	0.6	0.7	1.1	0.9	1.3	1.3	1	1.6	1	0.4	0.5	0.9	0.1	2.1	2.4	2	8.3
XZ009	申扎县	2020-01-01 09:00:00	0	0	0	0	0	0	0	0	0.2	0.3	0.3	0.4	0.5	0.5	1.3	0.6	0.7	1.1	0.9	1.3	1.3	1	1.6	1	0.4	0.5	0.9	0.1	2.1	2.4	2	8.3
XZ009	申扎县	2020-01-01 10:00:00	0	0	0	0	0	0	0	0	0.2	0.3	0.3	0.4	0.4	0.5	1.3	0.6	0.7	1.1	0.9	1.3	1.3	1	1.6	1	0.4	0.5	0.9	0.1	2.1	2.4	2	8.3
XZ009	申扎县	2020-01-01 11:00:00	0	0	0	0	0	0	0	0	0.2	0.3	0.3	0.4	0.5	0.5	1.3	0.6	0.7	1.1	0.9	1.3	1.3	1	1.6	1	0.4	0.5	0.9	0.1	2.1	2.4	2	8.3
XZ009	申扎县	2020-01-01 12:00:00	0	0	0	0	0	0	0	0	0.2	0.3	0.3	0.4	0.4	0.5	1.3	0.6	0.7	1.1	0.9	1.3	1.3	1	1.6	1	0.4	0.6	0.9	0.1	2.1	2.4	2	8.3
XZ009	申扎县	2020-01-01 13:00:00	0	0	0	0	0	0	0	0	0.2	0.3	0.3	0.4	0.4	0.5	1.3	0.6	0.7	1.1	0.9	1.3	1.3	1	1.6	1	0.4	0.5	0.9	0.1	2.1	2.4	2	8.3
XZ009	申扎县	2020-01-01 14:00:00	0	0	0	0	0	0	0	0	0.2	0.3	0.3	0.4	0.4	0.5	1.3	0.6	0.7	1.1	0.9	1.3	1.3	1	1.6	1	0.4	0.6	0.9	0.1	2.1	2.4	2	8.3
XZ009	申扎县	2020-01-01 15:00:00	0	0	0	0	0	0	0	0	0.2	0.3	0.3	0.4	0.4	0.5	1.3	0.6	0.7	1.1	0.9	1.3	1.3	1	1.6	1	0.4	0.5	0.9	0.1	2.1	2.4	2	8.3
XZ009	申扎县	2020-01-01 16:00:00	0	0	0	0	0	0	0	0	0.2	0.3	0.3	0.4	0.4	0.5	1.3	0.6	0.7	1.1	0.9	1.3	1.3	1	1.6	1	0.4	0.5	0.9	0.1	2.1	2.4	2	8.3
XZ009	申扎县	2020-01-01 17:00:00	0	0	0	0	0	0	0.1	0	0.2	0.3	0.3	0.4	0.4	0.5	1.3	0.6	0.7	1.1	0.9	1.3	1.3	1	1.6	1	0.4	0.5	0.9	0.1	2.1	2.4	2	8.3
XZ009	申扎县	2020-01-01 18:00:00	0	0	0	0	0	0	0.1	0	0.2	0.4	0.3	0.4	0.4	0.5	1.3	0.6	0.7	1	0.9	1.3	1.3	1	1.6	1	0.4	0.5	0.9	0.1	2.1	2.4	2	8.3
XZ009	申扎县	2020-01-01 19:00:00	0	0	0	0	0	0	0.1	0	0.3	0.4	0.3	0.4	0.4	0.5	1.3	0.6	0.7	1	0.9	1.3	1.3	1	1.6	1	0.4	0.5	0.8	0.1	2.1	2.4	2	8.3
XZ009	申扎县	2020-01-01 20:00:00	0	0	0	0	0	0	0.1	0	0.3	0.4	0.3	0.4	0.5	0.5	1.3	0.6	0.7	1	0.9	1.3	1.3	1	1.6	1	0.4	0.5	0.9	0.1	2.1	2.4	2	8.3
XZ009	申扎县	2020-01-01 21:00:00	0	0	0	0	0	0	0.1	0	0.3	0.4	0.3	0.4	0.5	0.5	1.4	0.6	0.7	1.1	0.9	1.3	1.3	1	1.6	1	0.4	0.6	0.9	0.1	2.1	2.4	2	8.3
XZ009	申扎县	2020-01-01 22:00:00	0	0	0	0	0	0	0.1	0	0.3	0.4	0.3	0.4	0.5	0.5	1.4	0.6	0.7	1.1	0.9	1.3	1.3	1	1.6	1	0.4	0.5	0.9	0.1	2.1	2.4	2	8.3
XZ009	申扎县	2020-01-01 23:00:00	0	0	0	0	0	0	0.1	0	0.3	0.4	0.3	0.4	0.5	0.5	1.4	0.6	0.7	1.1	0.9	1.3	1.3	1	1.6	1	0.4	0.5	0.9	0.1	2.1	2.4	2	8.3
XZ009	申扎县	2020-01-02 00:00:00	0	0	0	0	0	0	0.1	0	0.3	0.4	0.3	0.4	0.5	0.5	1.4	0.6	0.7	1.1	0.9	1.3	1.3	1	1.6	1	0.4	0.5	0.9	0.1	2.1	2.4	2	8.3
XZ009	申扎县	2020-01-02 01:00:00	0	0	0	0	0	0	0.1	0	0.3	0.4	0.3	0.4	0.5	0.5	1.4	0.6	0.7	1.1	0.9	1.3	1.3	1	1.6	1	0.4	0.5	0.9	0.1	2.1	2.4	2	8.3
XZ009	申扎县	2020-01-02 02:00:00	0	0	0	0	0	0	0.1	0	0.3	0.4	0.3	0.4	0.5	0.5	1.4	0.6	0.7	1.1	0.9	1.3	1.3	1	1.6	1	0.4	0.5	0.9	0.1	2.1	2.4	2	8.2
XZ009	申扎县	2020-01-02 03:00:00	0	0	0	0	0	0	0	0	0.2	0.4	0.3	0.4	0.5	0.5	1.4	0.6	0.7	1.1	0.9	1.3	1.3	1	1.6	1	0.4	0.5	0.9	0.1	2.1	2.4	2	8.3
XZ009	申扎县	2020-01-02 04:00:00	0	0	0	0	0	0	0	0	0.2	0.4	0.3	0.4	0.5	0.5	1.4	0.6	0.7	1.1	0.9	1.3	1.3	1	1.6	1	0.4	0.5	0.9	0.1	2.1	2.4	2	8.3
XZ009	申扎县	2020-01-02 05:00:00	0	0	0	0	0	0	0	0	0.2	0.4	0.3	0.4	0.5	0.5	1.4	0.6	0.7	1.1	0.9	1.3	1.3	1	1.6	1	0.4	0.5	0.9	0.1	2.1	2.4	2	8.3
XZ009	申扎县	2020-01-02 06:00:00	0	0	0	0	0	0	0	0	0.2	0.4	0.3	0.4	0.5	0.5	1.4	0.6	0.7	1.1	0.9	1.3	1.3	1	1.6	1	0.4	0.5	0.9	0.1	2.1	2.4	2	8.3
XZ009	申扎县	2020-01-02 07:00:00	0	0	0	0	0	0	0	0	0.2	0.4	0.3	0.4	0.5	0.5	1.4	0.6	0.7	1.1	0.9	1.3	1.3	1	1.6	1	0.4	0.5	0.9	0.1	2.1	2.4	2	8.3
XZ009	申扎县	2020-01-02 08:00:00	0	0	0	0	0	0	0	0	0.2	0.3	0.3	0.4	0.5	0.5	1.4	0.6	0.7	1.1	0.9	1.3	1.3	1	1.6	1	0.4	0.5	0.9	0.1	2.1	2.4	2	8.3
XZ009	申扎县	2020-01-02 09:00:00	0	0	0	0	0	0	0	0	0.2	0.3	0.3	0.4	0.4	0.5	1.3	0.6	0.7	1	0.9	1.3	1.3	1	1.6	1	0.4	0.5	0.9	0.1	2.1	2.4	2	8.2
XZ009	申扎县	2020-01-02 10:00:00	0	0	0	0	0	0	0	0	0.2	0.3	0.3	0.4	0.4	0.5	1.3	0.6	0.7	1.1	0.9	1.3	1.3	1	1.6	1	0.4	0.6	0.9	0.1	2.1	2.4	2	8.3
XZ009	申扎县	2020-01-02 11:00:00	0	0	0	0	0	0	0	0	0.2	0.3	0.3	0.4	0.4	0.5	1.3	0.6	0.7	1.1	0.9	1.3	1.3	1	1.6	1	0.4	0.6	0.9	0.1	2.1	2.4	2	8.3
XZ009	申扎县	2020-01-02 12:00:00	0	0	0	0	0	0	0	0	0.2	0.3	0.3	0.4	0.4	0.5	1.3	0.6	0.7	1.1	0.9	1.3	1.3	1	1.6	1	0.4	0.6	0.9	0.1	2.1	2.4	2	8.3
XZ009	申扎县	2020-01-02 13:00:00	0	0	0	0	0	0	0	0	0.2	0.3	0.3	0.4	0.4	0.5	1.3	0.6	0.7	1.1	0.9	1.3	1.3	1	1.6	1	0.4	0.6	0.9	0.1	2.1	2.4	2	8.3
XZ009	申扎县	2020-01-02 14:00:00	0	0	0	0	0	0	0	0	0.2	0.3	0.3	0.4	0.4	0.5	1.3	0.6	0.7	1.1	0.9	1.3	1.3	1	1.6	1	0.4	0.6	0.9	0.1	2.1	2.4	2	8.3
XZ009	申扎县	2020-01-02 15:00:00	0	0	0	0	0	0	0	0	0.2	0.3	0.3	0.4	0.4	0.5	1.3	0.6	0.7	1.1	0.9	1.3	1.3	1	1.6	1	0.4	0.6	0.9	0.1	2.1	2.4	2	8.2
XZ009	申扎县	2020-01-02 16:00:00	0	0	0	0	0	0	0	0	0.2	0.3	0.3	0.4	0.4	0.5	1.3	0.6	0.7	1	0.9	1.3	1.3	1	1.6	1	0.4	0.5	0.9	0.1	2.1	2.4	2	8.2
XZ009	申扎县	2020-01-02 17:00:00	0	0	0	0	0	0	0	0	0.2	0.3	0.3	0.4	0.4	0.5	1.3	0.6	0.7	1	0.9	1.3	1.3	1	1.6	1	0.4	0.5	0.9	0.1	2.1	2.4	2	8.3
XZ009	申扎县	2020-01-02 18:00:00	0	0	0	0	0	0	0	0	0.2	0.3	0.3	0.4	0.4	0.5	1.3	0.6	0.7	1	0.9	1.3	1.3	1	1.6	1	0.4	0.5	0.9	0.1	2.1	2.4	2	8.2
XZ009	申扎县	2020-01-02 19:00:00	0	0	0	0	0	0	0	0	0.2	0.3	0.3	0.4	0.4	0.5	1.3	0.6	0.7	1	0.9	1.3	1.3	1	1.6	1	0.4	0.5	0.9	0.1	2.1	2.4	2	8.3
XZ009	申扎县	2020-01-02 20:00:00	0	0	0	0	0	0	0	0	0.2	0.4	0.3	0.4	0.4	0.5	1.3	0.6	0.7	1	0.9	1.3	1.3	1	1.6	1	0.4	0.5	0.9	0.1	2.1	2.4	2	8.2
XZ009	申扎县	2020-01-02 21:00:00	0	0	0	0	0	0	0	0	0.2	0.4	0.3	0.4	0.4	0.5	1.3	0.6	0.7	1	0.9	1.3	1.3	1	1.6	1	0.4	0.5	0.9	0.1	2.1	2.4	2	8.2
XZ009	申扎县	2020-01-02 22:00:00	0	0	0	0	0	0	0	0	0.2	0.4	0.3	0.4	0.4	0.5	1.3	0.6	0.7	1	0.9	1.3	1.3	1	1.6	1	0.4	0.5	0.9	0.1	2.1	2.4	2	8.2
XZ009	申扎县	2020-01-02 23:00:00	0	0	0	0	0	0	0	0	0.2	0.4	0.3	0.4	0.4	0.5	1.3	0.6	0.7	1	0.9	1.3	1.3	1	1.6	1	0.4	0.5	0.9	0.1	2.1	2.4	2	8.2
XZ009	申扎县	2020-01-03 00:00:00	0	0	0	0	0	0	0	0	0.2	0.4	0.3	0.4	0.4	0.5	1.3	0.6	0.7	1	0.9	1.3	1.3	1	1.6	1	0.4	0.5	0.8	0.1	2.1	2.4	2	8.2
XZ009	申扎县	2020-01-03 01:00:00	0	0	0	0	0	0	0	0	0.2	0.3	0.3	0.4	0.4	0.5	1.3	0.6	0.7	1	0.9	1.3	1.3	1	1.6	1	0.4	0.5	0.9	0.1	2.1	2.4	2	8.2
XZ009	申扎县	2020-01-03 02:00:00	0	0	0	0	0	0	0	0	0.2	0.3	0.3	0.4	0.4	0.5	1.3	0.6	0.7	1	0.9	1.3	1.3	1	1.6	1	0.4	0.5	0.9	0.1	2.1	2.4	2	8.2
XZ009	申扎县	2020-01-03 03:00:00	0	0	0	0	0	0	0	0	0.2	0.3	0.3	0.4	0.4	0.5	1.3	0.6	0.7	1	0.9	1.3	1.3	1	1.6	1	0.4	0.5	0.9	0.1	2.1	2.4	2	8.2
XZ009	申扎县	2020-01-03 04:00:00	0	0	0	0	0	0	0	0	0.2	0.3	0.3	0.4	0.4	0.5	1.3	0.6	0.7	1	0.9	1.3	1.3	1	1.6	1	0.4	0.5	0.9	0.1	2.1	2.4	2	8.2
XZ009	申扎县	2020-01-03 05:00:00	0	0	0	0	0	0	0	0	0.2	0.3	0.3	0.4	0.4	0.5	1.3	0.6	0.7	1	0.9	1.3	1.3	1	1.6	1	0.4	0.5	0.9	0.1	2.1	2.4	2	8.2
XZ009	申扎县	2020-01-03 06:00:00	0	0	0	0	0	0	0	0	0.2	0.3	0.3	0.4	0.4	0.5	1.3	0.6	0.7	1	0.9	1.3	1.3	1	1.6	1	0.4	0.5	0.9	0.1	2.1	2.4	2	8.2
XZ009	申扎县	2020-01-03 07:00:00	0	0	0	0	0	0	0	0	0.2	0.3	0.3	0.4	0.4	0.5	1.3	0.6	0.7	1	0.9	1.3	1.3	1	1.6	1	0.4	0.5	0.9	0.1	2.1	2.4	2	8.2
XZ009	申扎县	2020-01-03 08:00:00	0	0	0	0	0	0	0	0	0.2	0.3	0.3	0.4	0.4	0.5	1.3	0.6	0.7	1	0.9	1.3	1.3	1	1.6	1	0.4	0.5	0.9	0.1	2.1	2.4	2	8.2
XZ009	申扎县	2020-01-03 09:00:00	0	0	0	0	0	0	0	0	0.1	0.3	0.3	0.4	0.4	0.5	1.3	0.6	0.7	1	0.9	1.3	1.3	1	1.6	1	0.4	0.5	0.8	0.1	2.1	2.4	2	8.2
XZ009	申扎县	2020-01-03 10:00:00	0	0	0	0	0	0	0	0	0.1	0.3	0.3	0.4	0.4	0.5	1.3	0.6	0.6	1	0.9	1.3	1.3	1	1.6	1	0.4	0.5	0.9	0.1	2.1	2.4	2	8.2
XZ009	申扎县	2020-01-03 11:00:00	0	0	0	0	0	0	0	0	0.1	0.3	0.3	0.3	0.4	0.5	1.3	0.6	0.6	1	0.9	1.2	1.3	1	1.5	1	0.4	0.5	0.9	0.1	2.1	2.4	2	8.2
XZ009	申扎县	2020-01-03 12:00:00	0	0	0	0	0	0	0	0	0.1	0.2	0.3	0.3	0.4	0.5	1.3	0.5	0.6	1	0.9	1.3	1.3	1	1.5	1	0.4	0.5	0.9	0.1	2.1	2.4	2	8.2
XZ009	申扎县	2020-01-03 13:00:00	0	0	0	0	0	0	0	0	0.1	0.2	0.3	0.3	0.4	0.5	1.3	0.5	0.6	1	0.9	1.2	1.3	1	1.5	1	0.4	0.5	0.8	0.1	2.1	2.4	2	8.2
XZ009	申扎县	2020-01-03 14:00:00	0	0	0	0	0	0	0	0	0.1	0.2	0.2	0.3	0.4	0.5	1.3	0.5	0.6	1	0.9	1.2	1.3	1	1.5	1	0.4	0.5	0.8	0.1	2.1	2.4	2	8.2
XZ009	申扎县	2020-01-03 15:00:00	0	0	0	0	0	0	0	0	0.1	0.3	0.2	0.3	0.4	0.4	1.3	0.5	0.6	1	0.9	1.2	1.3	1	1.5	1	0.4	0.5	0.8	0.1	2.1	2.4	2	8.2
XZ009	申扎县	2020-01-03 16:00:00	0	0	0	0	0	0	0	0	0.2	0.3	0.3	0.3	0.4	0.5	1.3	0.5	0.6	1	0.9	1.2	1.3	1	1.5	0.9	0.4	0.5	0.8	0.1	2.1	2.4	2	8.2
XZ009	申扎县	2020-01-03 17:00:00	0	0	0	0	0	0	0	0	0.2	0.3	0.3	0.3	0.4	0.5	1.3	0.5	0.6	1	0.9	1.2	1.3	0.9	1.5	0.9	0.4	0.5	0.8	0.1	2.1	2.4	2	8.2
XZ009	申扎县	2020-01-03 18:00:00	0	0	0	0	0	0	0	0	0.2	0.3	0.3	0.4	0.4	0.5	1.3	0.5	0.6	1	0.9	1.2	1.3	0.9	1.5	0.9	0.4	0.5	0.8	0.1	2.1	2.4	1.9	8.2
XZ009	申扎县	2020-01-03 19:00:00	0	0	0	0	0	0	0	0	0.2	0.3	0.3	0.4	0.4	0.5	1.3	0.5	0.6	1	0.9	1.2	1.2	0.9	1.5	0.9	0.4	0.5	0.8	0.1	2.1	2.4	2	8.2
XZ009	申扎县	2020-01-03 20:00:00	0	0	0	0	0	0	0.1	0	0.2	0.3	0.3	0.4	0.4	0.5	1.3	0.5	0.6	1	0.9	1.2	1.3	0.9	1.5	0.9	0.4	0.5	0.8	0.1	2.1	2.4	1.9	8.2
XZ009	申扎县	2020-01-03 21:00:00	0	0	0	0	0	0	0.1	0	0.2	0.3	0.3	0.4	0.4	0.5	1.3	0.5	0.6	1	0.9	1.2	1.3	0.9	1.5	0.9	0.4	0.5	0.8	0.1	2.1	2.4	1.9	8.1
XZ009	申扎县	2020-01-03 22:00:00	0	0	0	0	0	0	0	0	0.2	0.4	0.3	0.4	0.4	0.5	1.3	0.5	0.6	1	0.9	1.2	1.3	0.9	1.5	0.9	0.4	0.5	0.8	0.1	2.1	2.3	1.9	8.1
XZ009	申扎县	2020-01-03 23:00:00	0	0	0	0	0	0	0.1	0	0.2	0.4	0.3	0.4	0.4	0.5	1.3	0.6	0.6	1	0.9	1.2	1.2	0.9	1.5	0.9	0.4	0.5	0.8	0.1	2.1	2.3	1.9	8.1
XZ009	申扎县	2020-01-04 00:00:00	0	0	0	0	0	0	0	0	0.2	0.4	0.3	0.4	0.4	0.5	1.3	0.6	0.6	1	0.9	1.2	1.3	0.9	1.5	0.9	0.4	0.5	0.8	0.1	2.1	2.3	1.9	8.1
XZ009	申扎县	2020-01-04 01:00:00	0	0	0	0	0	0	0	0	0.2	0.4	0.3	0.4	0.4	0.5	1.3	0.6	0.6	1	0.9	1.2	1.3	0.9	1.5	0.9	0.4	0.5	0.8	0.1	2.1	2.3	1.9	8.1
XZ009	申扎县	2020-01-04 02:00:00	0	0	0	0	0	0	0	0	0.2	0.3	0.3	0.4	0.4	0.5	1.3	0.6	0.6	1	0.9	1.2	1.3	0.9	1.5	0.9	0.4	0.5	0.8	0.1	2.1	2.3	1.9	8.1
XZ009	申扎县	2020-01-04 03:00:00	0	0	0	0	0	0	0	0	0.2	0.3	0.3	0.4	0.4	0.5	1.3	0.6	0.6	1	0.9	1.2	1.3	0.9	1.5	0.9	0.4	0.5	0.8	0.1	2.1	2.3	1.9	8.1
XZ009	申扎县	2020-01-04 04:00:00	0	0	0	0	0	0	0	0	0.2	0.3	0.3	0.4	0.4	0.5	1.3	0.6	0.6	1	0.9	1.2	1.3	0.9	1.5	0.9	0.4	0.5	0.8	0.1	2.1	2.3	1.9	8.1
XZ009	申扎县	2020-01-04 05:00:00	0	0	0	0	0	0	0	0	0.2	0.3	0.3	0.4	0.4	0.5	1.3	0.6	0.6	1	0.9	1.2	1.3	0.9	1.5	0.9	0.4	0.5	0.8	0.1	2	2.3	1.9	8.1
XZ009	申扎县	2020-01-04 06:00:00	0	0	0	0	0	0	0	0	0.2	0.3	0.3	0.4	0.4	0.5	1.3	0.5	0.6	1	0.9	1.2	1.3	0.9	1.5	0.9	0.4	0.5	0.8	0.1	2.1	2.3	1.9	8.1
XZ009	申扎县	2020-01-04 07:00:00	0	0	0	0	0	0	0	0	0.2	0.3	0.3	0.4	0.4	0.5	1.3	0.6	0.6	1	0.9	1.2	1.3	0.9	1.5	0.9	0.4	0.5	0.8	0.1	2.1	2.3	1.9	8.1
XZ009	申扎县	2020-01-04 08:00:00	0	0	0	0	0	0	0	0	0.2	0.3	0.3	0.4	0.4	0.5	1.3	0.6	0.6	1	0.9	1.2	1.3	0.9	1.5	0.9	0.4	0.5	0.8	0.1	2	2.3	1.9	8.1
XZ009	申扎县	2020-01-04 09:00:00	0	0	0	0	0	0	0	0	0.2	0.3	0.3	0.4	0.4	0.5	1.3	0.6	0.6	1	0.9	1.2	1.3	1	1.5	0.9	0.4	0.5	0.8	0.1	2.1	2.3	1.9	8.1
XZ009	申扎县	2020-01-04 10:00:00	0	0	0	0	0	0	0	0	0.2	0.3	0.3	0.4	0.4	0.5	1.3	0.6	0.6	1	0.9	1.2	1.2	0.9	1.5	0.9	0.4	0.5	0.8	0.1	2	2.3	1.9	8.1
XZ009	申扎县	2020-01-04 11:00:00	0	0	0	0	0	0	0	0	0.2	0.3	0.3	0.4	0.4	0.5	1.3	0.5	0.6	1	0.9	1.2	1.3	0.9	1.5	0.9	0.4	0.5	0.8	0.1	2	2.3	1.9	8.1
XZ009	申扎县	2020-01-04 12:00:00	0	0	0	0	0	0	0	0	0.1	0.3	0.3	0.3	0.4	0.5	1.3	0.6	0.6	1	0.9	1.2	1.3	0.9	1.5	0.9	0.4	0.5	0.8	0.1	2.1	2.3	1.9	8.1
XZ009	申扎县	2020-01-04 13:00:00	0	0	0	0	0	0	0	0	0.1	0.3	0.3	0.4	0.4	0.5	1.3	0.5	0.6	1	0.9	1.2	1.2	0.9	1.5	0.9	0.4	0.5	0.8	0.1	2.1	2.3	1.9	8.1
XZ009	申扎县	2020-01-04 14:00:00	0	0	0	0	0	0	0	0	0.2	0.3	0.3	0.4	0.4	0.5	1.3	0.5	0.6	1	0.9	1.2	1.2	0.9	1.5	0.9	0.4	0.5	0.8	0.1	2	2.3	1.9	8.1
XZ009	申扎县	2020-01-04 15:00:00	0	0	0	0	0	0	0	0	0.2	0.3	0.3	0.4	0.4	0.5	1.3	0.5	0.6	1	0.9	1.2	1.2	0.9	1.5	0.9	0.4	0.5	0.8	0.1	2	2.3	1.9	8.1
XZ009	申扎县	2020-01-04 16:00:00	0	0	0	0	0	0	0	0	0.2	0.3	0.3	0.4	0.4	0.5	1.3	0.5	0.6	1	0.9	1.2	1.2	0.9	1.5	0.9	0.4	0.5	0.8	0.1	2.1	2.3	1.9	8.1
XZ009	申扎县	2020-01-04 17:00:00	0	0	0	0	0	0	0	0	0.2	0.3	0.3	0.4	0.4	0.5	1.3	0.5	0.6	1	0.9	1.2	1.2	0.9	1.5	0.9	0.4	0.5	0.8	0.1	2	2.3	1.9	8.1
XZ009	申扎县	2020-01-04 18:00:00	0	0	0	0	0	0	0	0	0.2	0.3	0.3	0.4	0.4	0.5	1.3	0.5	0.6	1	0.9	1.2	1.2	0.9	1.5	0.9	0.4	0.5	0.8	0.1	2	2.3	1.9	8.1
XZ009	申扎县	2020-01-04 19:00:00	0	0	0	0	0	0	0	0	0.2	0.3	0.3	0.4	0.4	0.5	1.3	0.5	0.6	1	0.9	1.2	1.2	0.9	1.5	0.9	0.4	0.5	0.8	0.1	2	2.3	1.9	8.1
XZ009	申扎县	2020-01-04 20:00:00	0	0	0	0	0	0	0	0	0.2	0.3	0.3	0.4	0.4	0.5	1.3	0.5	0.6	1	0.9	1.2	1.2	0.9	1.5	0.9	0.4	0.5	0.8	0.1	2	2.3	1.9	8.1
XZ009	申扎县	2020-01-04 21:00:00	0	0	0	0	0	0	0	0	0.2	0.3	0.3	0.4	0.4	0.5	1.3	0.5	0.6	1	0.9	1.2	1.2	0.9	1.5	0.9	0.4	0.5	0.8	0.1	2	2.3	1.9	8.1
XZ009	申扎县	2020-01-04 22:00:00	0	0	0	0	0	0	0	0	0.2	0.3	0.3	0.4	0.4	0.5	1.3	0.5	0.6	1	0.9	1.2	1.2	0.9	1.5	0.9	0.4	0.5	0.8	0.1	2	2.3	1.9	8.1
XZ009	申扎县	2020-01-04 23:00:00	0	0	0	0	0	0	0	0	0.2	0.3	0.3	0.4	0.4	0.5	1.3	0.5	0.6	1	0.9	1.2	1.2	0.9	1.5	0.9	0.4	0.5	0.8	0.1	2	2.3	1.9	8.1
XZ009	申扎县	2020-01-05 00:00:00	0	0	0	0	0	0	0	0	0.2	0.3	0.3	0.4	0.4	0.5	1.3	0.5	0.6	1	0.9	1.2	1.2	0.9	1.5	0.9	0.4	0.5	0.8	0.1	2	2.3	1.9	8.1
XZ009	申扎县	2020-01-05 01:00:00	0	0	0	0	0	0	0	0	0.2	0.3	0.3	0.4	0.4	0.5	1.3	0.5	0.6	1	0.9	1.2	1.2	0.9	1.5	0.9	0.4	0.5	0.8	0.1	2	2.3	1.9	8
XZ009	申扎县	2020-01-05 02:00:00	0	0	0	0	0	0	0	0	0.2	0.3	0.3	0.4	0.4	0.5	1.3	0.6	0.6	1	0.9	1.2	1.2	0.9	1.5	0.9	0.4	0.5	0.8	0.1	2	2.3	1.9	8
XZ009	申扎县	2020-01-05 03:00:00	0	0	0	0	0	0	0	0	0.2	0.3	0.3	0.4	0.4	0.5	1.3	0.5	0.6	1	0.9	1.2	1.2	0.9	1.5	0.9	0.4	0.5	0.8	0.1	2	2.3	1.9	8
XZ009	申扎县	2020-01-05 04:00:00	0	0	0	0	0	0	0	0	0.2	0.3	0.3	0.4	0.4	0.5	1.3	0.6	0.6	1	0.9	1.2	1.3	0.9	1.5	0.9	0.4	0.5	0.8	0.1	2	2.3	1.9	8
XZ009	申扎县	2020-01-05 05:00:00	0	0	0	0	0	0	0	0	0.2	0.3	0.3	0.4	0.4	0.5	1.3	0.6	0.6	1	0.9	1.2	1.2	0.9	1.5	0.9	0.4	0.5	0.8	0.1	2	2.3	1.9	8
XZ009	申扎县	2020-01-05 06:00:00	0	0	0	0	0	0	0	0	0.2	0.3	0.3	0.4	0.4	0.5	1.3	0.6	0.6	1	0.9	1.2	1.3	0.9	1.5	0.9	0.4	0.5	0.8	0.1	2	2.3	1.9	8
XZ009	申扎县	2020-01-05 07:00:00	0	0	0	0	0	0	0	0	0.2	0.3	0.3	0.4	0.4	0.5	1.3	0.6	0.6	1	0.9	1.2	1.2	0.9	1.5	0.9	0.4	0.5	0.8	0.1	2	2.3	1.9	8
XZ009	申扎县	2020-01-05 08:00:00	0	0	0	0	0	0	0	0	0.2	0.3	0.3	0.4	0.4	0.5	1.3	0.5	0.6	1	0.9	1.2	1.2	0.9	1.5	0.9	0.4	0.5	0.8	0.1	2	2.3	1.9	8
XZ009	申扎县	2020-01-05 09:00:00	0	0	0	0	0	0	0	0	0.2	0.3	0.3	0.4	0.4	0.5	1.3	0.5	0.6	1	0.9	1.2	1.2	0.9	1.5	0.9	0.4	0.5	0.8	0.1	2	2.3	1.9	8
XZ009	申扎县	2020-01-05 10:00:00	0	0	0	0	0	0	0	0	0.2	0.3	0.3	0.4	0.4	0.5	1.3	0.5	0.6	1	0.9	1.2	1.2	0.9	1.5	0.9	0.4	0.5	0.8	0.1	2	2.3	1.9	8
XZ009	申扎县	2020-01-05 11:00:00	0	0	0	0	0	0	0	0	0.2	0.3	0.3	0.4	0.4	0.5	1.3	0.5	0.6	1	0.9	1.2	1.2	0.9	1.5	0.9	0.4	0.5	0.8	0.1	2	2.3	1.9	8
XZ009	申扎县	2020-01-05 12:00:00	0	0	0	0	0	0	0	0	0.2	0.3	0.3	0.4	0.4	0.5	1.3	0.5	0.6	1	0.9	1.2	1.2	0.9	1.5	0.9	0.4	0.5	0.8	0.1	2	2.3	1.9	8
XZ009	申扎县	2020-01-05 13:00:00	0	0	0	0	0	0	0	0	0.2	0.3	0.3	0.4	0.4	0.5	1.3	0.5	0.6	1	0.9	1.2	1.2	0.9	1.5	0.9	0.4	0.5	0.8	0.1	2	2.3	1.9	8
XZ009	申扎县	2020-01-05 14:00:00	0	0	0	0	0	0	0	0	0.2	0.3	0.3	0.4	0.4	0.5	1.3	0.5	0.6	1	0.9	1.2	1.2	0.9	1.5	0.9	0.4	0.5	0.8	0.1	2	2.3	1.8	8
XZ009	申扎县	2020-01-05 15:00:00	0	0	0	0	0	0	0	0	0.2	0.3	0.3	0.4	0.4	0.5	1.3	0.5	0.6	1	0.9	1.2	1.3	0.9	1.5	0.9	0.4	0.5	0.8	0.1	2	2.3	1.9	8
XZ009	申扎县	2020-01-05 16:00:00	0	0	0	0	0	0	0	0	0.2	0.3	0.3	0.3	0.4	0.5	1.3	0.5	0.6	1	0.9	1.2	1.2	0.9	1.5	0.9	0.4	0.5	0.8	0.1	2	2.3	1.8	8
XZ009	申扎县	2020-01-05 17:00:00	0	0	0	0	0	0	0	0	0.2	0.3	0.3	0.4	0.4	0.5	1.3	0.5	0.6	1	0.9	1.2	1.2	0.9	1.5	0.9	0.4	0.5	0.8	0.1	2	2.3	1.8	8
XZ009	申扎县	2020-01-05 18:00:00	0	0	0	0	0	0	0	0	0.2	0.3	0.3	0.4	0.4	0.4	1.3	0.5	0.6	1	0.9	1.2	1.2	0.9	1.5	0.9	0.4	0.5	0.8	0.1	2	2.3	1.8	8
XZ009	申扎县	2020-01-05 19:00:00	0	0	0	0	0	0	0	0	0.2	0.3	0.3	0.4	0.4	0.5	1.3	0.5	0.6	1	0.9	1.2	1.2	0.9	1.5	0.9	0.4	0.5	0.8	0.1	2	2.3	1.8	8
XZ009	申扎县	2020-01-05 20:00:00	0	0	0	0	0	0	0	0	0.2	0.3	0.3	0.4	0.4	0.5	1.3	0.5	0.6	1	0.9	1.2	1.2	0.9	1.5	0.9	0.4	0.5	0.8	0.1	2	2.3	1.8	8
XZ009	申扎县	2020-01-05 21:00:00	0	0	0	0	0	0	0	0	0.2	0.3	0.3	0.4	0.4	0.5	1.3	0.5	0.6	1	0.9	1.2	1.2	0.9	1.5	0.9	0.4	0.5	0.8	0.1	2	2.3	1.8	8
XZ009	申扎县	2020-01-05 22:00:00	0	0	0	0	0	0	0	0	0.2	0.3	0.3	0.4	0.4	0.5	1.3	0.5	0.6	1	0.9	1.2	1.2	0.9	1.5	0.9	0.4	0.5	0.8	0.1	2	2.3	1.8	8
XZ009	申扎县	2020-01-05 23:00:00	0	0	0	0	0	0	0	0	0.2	0.3	0.3	0.4	0.4	0.5	1.3	0.5	0.6	1	0.9	1.2	1.2	0.9	1.5	0.9	0.4	0.5	0.8	0.1	2	2.2	1.8	8
XZ009	申扎县	2020-01-06 00:00:00	0	0	0	0	0	0	0	0	0.2	0.3	0.3	0.4	0.4	0.5	1.3	0.5	0.6	1	0.9	1.2	1.2	0.9	1.5	0.9	0.4	0.5	0.8	0.1	2	2.3	1.8	8
XZ009	申扎县	2020-01-06 01:00:00	0	0	0	0	0	0	0	0	0.2	0.3	0.3	0.4	0.4	0.5	1.3	0.5	0.6	1	0.9	1.2	1.2	0.9	1.5	0.9	0.4	0.5	0.8	0.1	2	2.2	1.8	8
XZ009	申扎县	2020-01-06 02:00:00	0	0	0	0	0	0	0	0	0.2	0.3	0.3	0.4	0.4	0.5	1.3	0.5	0.6	1	0.9	1.2	1.2	0.9	1.5	0.9	0.4	0.5	0.8	0.1	2	2.2	1.8	8
XZ009	申扎县	2020-01-06 03:00:00	0	0	0	0	0	0	0	0	0.1	0.3	0.3	0.4	0.4	0.5	1.3	0.5	0.6	1	0.9	1.2	1.2	0.9	1.5	0.9	0.4	0.5	0.8	0.1	2	2.2	1.8	8
XZ009	申扎县	2020-01-06 04:00:00	0	0	0	0	0	0	0	0	0.1	0.3	0.3	0.4	0.4	0.5	1.3	0.5	0.6	1	0.9	1.2	1.2	0.9	1.5	0.9	0.4	0.5	0.8	0.1	2	2.2	1.8	8
XZ009	申扎县	2020-01-06 05:00:00	0	0	0	0	0	0	0	0	0.1	0.3	0.3	0.3	0.4	0.5	1.3	0.5	0.6	1	0.9	1.2	1.2	0.9	1.5	0.9	0.4	0.5	0.8	0.1	2	2.2	1.8	8
XZ009	申扎县	2020-01-06 06:00:00	0	0	0	0	0	0	0	0	0.1	0.2	0.2	0.3	0.4	0.4	1.3	0.5	0.6	1	0.9	1.2	1.2	0.9	1.5	0.9	0.4	0.5	0.8	0.1	2	2.2	1.8	8
XZ009	申扎县	2020-01-06 07:00:00	0	0	0	0	0	0	0	0	0.1	0.2	0.2	0.3	0.4	0.4	1.3	0.5	0.6	1	0.9	1.2	1.2	0.9	1.5	0.9	0.4	0.5	0.8	0.1	2	2.2	1.8	8
XZ009	申扎县	2020-01-06 08:00:00	0	0	0	0	0	0	0	0	0.1	0.2	0.2	0.3	0.4	0.4	1.3	0.5	0.6	1	0.9	1.2	1.2	0.9	1.5	0.9	0.4	0.5	0.8	0.1	2	2.2	1.8	8
XZ009	申扎县	2020-01-06 09:00:00	0	0	0	0	0	0	0	0	0.1	0.2	0.2	0.3	0.4	0.4	1.3	0.5	0.6	1	0.9	1.2	1.2	0.9	1.5	0.9	0.4	0.5	0.8	0.1	2	2.2	1.8	8
XZ009	申扎县	2020-01-06 10:00:00	0	0	0	0	0	0	0	0	0.1	0.2	0.2	0.3	0.4	0.4	1.2	0.5	0.6	1	0.8	1.1	1.2	0.9	1.5	0.9	0.4	0.5	0.8	0.1	2	2.2	1.8	8
XZ009	申扎县	2020-01-06 11:00:00	0	0	0	0	0	0	0	0	0.1	0.2	0.2	0.3	0.4	0.4	1.2	0.5	0.6	1	0.8	1.1	1.2	0.9	1.5	0.9	0.4	0.5	0.8	0.1	2	2.2	1.8	8
XZ009	申扎县	2020-01-06 12:00:00	0	0	0	0	0	0	0	0	0.1	0.2	0.2	0.3	0.3	0.4	1.2	0.5	0.6	1	0.8	1.1	1.2	0.9	1.4	0.9	0.4	0.5	0.8	0.1	2	2.2	1.8	8
XZ009	申扎县	2020-01-06 13:00:00	0	0	0	0	0	0	0	0	0.1	0.2	0.2	0.3	0.3	0.4	1.2	0.5	0.6	0.9	0.8	1.1	1.2	0.9	1.4	0.9	0.4	0.5	0.8	0.1	2	2.2	1.8	8
XZ009	申扎县	2020-01-06 14:00:00	0	0	0	0	0	0	0	0	0.1	0.2	0.2	0.3	0.3	0.4	1.2	0.5	0.6	1	0.8	1.1	1.2	0.9	1.4	0.9	0.4	0.5	0.8	0.1	2	2.2	1.8	8
XZ009	申扎县	2020-01-06 15:00:00	0	0	0	0	0	0	0	0	0.1	0.2	0.2	0.3	0.3	0.4	1.2	0.5	0.6	0.9	0.8	1.1	1.2	0.9	1.4	0.9	0.4	0.5	0.8	0.1	2	2.2	1.8	8
XZ009	申扎县	2020-01-06 16:00:00	0	0	0	0	0	0	0	0	0.1	0.2	0.2	0.3	0.3	0.4	1.2	0.5	0.6	0.9	0.8	1.1	1.2	0.9	1.4	0.9	0.4	0.5	0.8	0.1	2	2.2	1.8	7.9
XZ009	申扎县	2020-01-06 17:00:00	0	0	0	0	0	0	0	0	0.1	0.2	0.2	0.3	0.3	0.4	1.2	0.5	0.6	0.9	0.8	1.1	1.2	0.9	1.4	0.8	0.4	0.5	0.8	0.1	2	2.2	1.8	8
XZ009	申扎县	2020-01-06 18:00:00	0	0	0	0	0	0	0	0	0.1	0.2	0.2	0.3	0.3	0.4	1.2	0.5	0.6	0.9	0.8	1.1	1.2	0.8	1.4	0.9	0.4	0.5	0.8	0.1	2	2.2	1.8	7.9
XZ009	申扎县	2020-01-06 19:00:00	0	0	0	0	0	0	0	0	0.1	0.2	0.2	0.3	0.3	0.4	1.2	0.5	0.6	0.9	0.8	1.1	1.2	0.8	1.4	0.8	0.4	0.5	0.8	0.1	2	2.2	1.8	7.9
XZ009	申扎县	2020-01-06 20:00:00	0	0	0	0	0	0	0	0	0.1	0.2	0.2	0.3	0.3	0.4	1.2	0.5	0.6	0.9	0.8	1.1	1.2	0.8	1.4	0.8	0.4	0.5	0.8	0.1	1.9	2.2	1.8	8
XZ009	申扎县	2020-01-06 21:00:00	0	0	0	0	0	0	0	0	0.1	0.2	0.2	0.3	0.4	0.4	1.2	0.5	0.6	0.9	0.8	1.1	1.2	0.8	1.4	0.8	0.4	0.5	0.8	0.1	1.9	2.2	1.8	7.9
XZ009	申扎县	2020-01-06 22:00:00	0	0	0	0	0	0	0	0	0.2	0.3	0.2	0.3	0.4	0.4	1.2	0.5	0.6	0.9	0.8	1.1	1.2	0.8	1.4	0.8	0.4	0.5	0.8	0.1	1.9	2.2	1.8	7.9
XZ009	申扎县	2020-01-06 23:00:00	0	0	0	0	0	0	0	0	0.1	0.3	0.2	0.3	0.4	0.4	1.2	0.5	0.6	0.9	0.8	1.1	1.2	0.8	1.4	0.8	0.4	0.5	0.8	0.1	1.9	2.2	1.8	7.9
XZ009	申扎县	2020-01-07 00:00:00	0	0	0	0	0	0	0	0	0.2	0.3	0.2	0.3	0.4	0.4	1.2	0.5	0.6	0.9	0.8	1.1	1.2	0.8	1.4	0.8	0.4	0.5	0.8	0	1.9	2.2	1.8	7.9
XZ009	申扎县	2020-01-07 01:00:00	0	0	0	0	0	0	0	0	0.1	0.3	0.2	0.3	0.4	0.4	1.2	0.5	0.6	0.9	0.8	1.1	1.2	0.8	1.4	0.8	0.4	0.5	0.8	0	1.9	2.2	1.7	7.9
XZ009	申扎县	2020-01-07 02:00:00	0	0	0	0	0	0	0	0	0.1	0.2	0.2	0.3	0.4	0.4	1.2	0.5	0.6	0.9	0.8	1.1	1.2	0.8	1.4	0.8	0.4	0.5	0.7	0	1.9	2.2	1.7	7.9
XZ009	申扎县	2020-01-07 03:00:00	0	0	0	0	0	0	0	0	0.1	0.2	0.2	0.3	0.4	0.4	1.2	0.5	0.6	0.9	0.8	1.1	1.2	0.8	1.4	0.8	0.4	0.5	0.7	0	1.9	2.2	1.7	7.9
XZ009	申扎县	2020-01-07 04:00:00	0	0	0	0	0	0	0	0	0.1	0.2	0.2	0.3	0.4	0.4	1.2	0.5	0.6	0.9	0.8	1.1	1.2	0.8	1.4	0.8	0.4	0.5	0.7	0	1.9	2.2	1.7	7.9
XZ009	申扎县	2020-01-07 05:00:00	0	0	0	0	0	0	0	0	0.1	0.2	0.2	0.3	0.4	0.4	1.2	0.5	0.6	0.9	0.8	1.1	1.2	0.8	1.4	0.8	0.4	0.5	0.7	0	1.9	2.2	1.7	7.9
XZ009	申扎县	2020-01-07 06:00:00	0	0	0	0	0	0	0	0	0.1	0.2	0.2	0.3	0.4	0.4	1.2	0.5	0.6	0.9	0.8	1.1	1.1	0.8	1.4	0.8	0.4	0.5	0.7	0	1.9	2.2	1.7	7.9
XZ009	申扎县	2020-01-07 07:00:00	0	0	0	0	0	0	0	0	0.1	0.2	0.2	0.3	0.3	0.4	1.2	0.5	0.6	0.9	0.8	1.1	1.1	0.8	1.4	0.8	0.4	0.5	0.7	0	1.9	2.2	1.7	7.8
XZ009	申扎县	2020-01-07 08:00:00	0	0	0	0	0	0	0	0	0.1	0.2	0.2	0.3	0.4	0.4	1.2	0.5	0.6	0.9	0.8	1.1	1.2	0.8	1.4	0.8	0.4	0.5	0.7	0	1.9	2.1	1.7	7.8
XZ009	申扎县	2020-01-07 09:00:00	0	0	0	0	0	0	0	0	0.1	0.2	0.2	0.3	0.3	0.4	1.2	0.5	0.6	0.9	0.8	1.1	1.2	0.8	1.4	0.8	0.4	0.5	0.8	0	1.9	2.1	1.7	7.9
XZ009	申扎县	2020-01-07 10:00:00	0	0	0	0	0	0	0	0	0.1	0.2	0.2	0.3	0.3	0.4	1.2	0.5	0.6	0.9	0.8	1.1	1.1	0.8	1.4	0.8	0.4	0.5	0.7	0	1.9	2.1	1.7	7.9
XZ009	申扎县	2020-01-07 11:00:00	0	0	0	0	0	0	0	0	0.1	0.2	0.2	0.3	0.3	0.4	1.2	0.5	0.6	0.9	0.8	1.1	1.1	0.8	1.4	0.8	0.4	0.5	0.7	0	1.9	2.1	1.7	7.9
XZ009	申扎县	2020-01-07 12:00:00	0	0	0	0	0	0	0	0	0.1	0.2	0.2	0.3	0.3	0.4	1.2	0.5	0.6	0.9	0.8	1.1	1.1	0.8	1.4	0.8	0.4	0.5	0.7	0	1.9	2.1	1.7	7.8
XZ009	申扎县	2020-01-07 13:00:00	0	0	0	0	0	0	0	0	0.1	0.2	0.2	0.3	0.3	0.4	1.2	0.5	0.6	0.9	0.8	1.1	1.1	0.8	1.4	0.8	0.4	0.5	0.7	0	1.9	2.1	1.7	7.8
XZ009	申扎县	2020-01-07 14:00:00	0	0	0	0	0	0	0	0	0.1	0.2	0.2	0.3	0.3	0.4	1.2	0.5	0.6	0.9	0.8	1.1	1.1	0.8	1.4	0.8	0.4	0.5	0.7	0	1.9	2.1	1.7	7.8
XZ009	申扎县	2020-01-07 15:00:00	0	0	0	0	0	0	0	0	0.1	0.2	0.2	0.3	0.3	0.4	1.2	0.4	0.6	0.9	0.8	1.1	1.1	0.8	1.3	0.8	0.4	0.5	0.7	0	1.9	2.1	1.7	7.8
XZ009	申扎县	2020-01-07 16:00:00	0	0	0	0	0	0	0	0	0.1	0.2	0.2	0.3	0.3	0.4	1.2	0.5	0.6	0.9	0.8	1	1.1	0.8	1.4	0.8	0.4	0.5	0.7	0	1.9	2.1	1.7	7.8
XZ009	申扎县	2020-01-07 17:00:00	0	0	0	0	0	0	0	0	0.1	0.2	0.2	0.3	0.3	0.4	1.2	0.5	0.6	0.9	0.8	1	1.1	0.8	1.4	0.8	0.4	0.5	0.7	0	1.9	2.1	1.7	7.8
XZ009	申扎县	2020-01-07 18:00:00	0	0	0	0	0	0	0	0	0.2	0.3	0.2	0.3	0.3	0.4	1.2	0.5	0.5	0.9	0.8	1	1.1	0.8	1.4	0.8	0.4	0.5	0.7	0	1.9	2.1	1.7	7.8
XZ009	申扎县	2020-01-07 19:00:00	0	0	0	0	0	0	0	0	0.2	0.3	0.3	0.3	0.4	0.4	1.2	0.5	0.6	0.9	0.8	1	1.1	0.8	1.4	0.8	0.3	0.5	0.7	0	1.9	2.1	1.7	7.8
XZ009	申扎县	2020-01-07 20:00:00	0	0	0	0	0	0	0	0	0.2	0.3	0.3	0.3	0.4	0.4	1.2	0.5	0.6	0.9	0.8	1	1.1	0.8	1.4	0.8	0.3	0.5	0.7	0	1.9	2.1	1.7	7.8
XZ009	申扎县	2020-01-07 21:00:00	0	0	0	0	0	0	0	0	0.2	0.3	0.3	0.3	0.4	0.4	1.2	0.5	0.6	0.9	0.8	1	1.1	0.8	1.4	0.8	0.3	0.5	0.7	0	1.9	2.1	1.7	7.8
XZ009	申扎县	2020-01-07 22:00:00	0	0	0	0	0	0	0	0	0.2	0.3	0.3	0.3	0.4	0.4	1.2	0.5	0.6	0.9	0.8	1.1	1.1	0.8	1.4	0.8	0.3	0.5	0.7	0	1.9	2.1	1.7	7.8
XZ009	申扎县	2020-01-07 23:00:00	0	0	0	0	0	0	0	0	0.2	0.3	0.3	0.3	0.4	0.4	1.2	0.5	0.6	0.9	0.8	1.1	1.1	0.8	1.4	0.8	0.3	0.5	0.7	0	1.9	2.1	1.7	7.8
XZ009	申扎县	2020-01-08 00:00:00	0	0	0	0	0	0	0	0	0.2	0.3	0.3	0.4	0.4	0.4	1.2	0.5	0.6	0.9	0.8	1.1	1.1	0.8	1.4	0.8	0.3	0.5	0.7	0	1.9	2.1	1.7	7.8
XZ009	申扎县	2020-01-08 01:00:00	0	0	0	0	0	0	0	0	0.2	0.3	0.3	0.4	0.4	0.4	1.2	0.5	0.6	0.9	0.8	1.1	1.1	0.8	1.4	0.8	0.3	0.5	0.7	0	1.9	2.1	1.7	7.8
XZ009	申扎县	2020-01-08 02:00:00	0	0	0	0	0	0	0	0	0.2	0.3	0.3	0.4	0.4	0.4	1.2	0.5	0.6	0.9	0.8	1.1	1.1	0.8	1.4	0.8	0.3	0.5	0.7	0	1.9	2.1	1.7	7.8
XZ009	申扎县	2020-01-08 03:00:00	0	0	0	0	0	0	0	0	0.2	0.3	0.3	0.4	0.4	0.4	1.2	0.5	0.6	0.9	0.8	1.1	1.1	0.8	1.4	0.8	0.3	0.5	0.7	0	1.9	2.1	1.7	7.8
XZ009	申扎县	2020-01-08 04:00:00	0	0	0	0	0	0	0	0	0.2	0.3	0.3	0.3	0.4	0.4	1.2	0.5	0.6	0.9	0.8	1.1	1.1	0.8	1.4	0.8	0.3	0.5	0.7	0	1.9	2.1	1.7	7.8
XZ009	申扎县	2020-01-08 05:00:00	0	0	0	0	0	0	0	0	0.2	0.3	0.3	0.3	0.4	0.4	1.2	0.5	0.6	0.9	0.8	1.1	1.2	0.8	1.4	0.8	0.3	0.5	0.7	0	1.9	2.1	1.7	7.8
XZ009	申扎县	2020-01-08 06:00:00	0	0	0	0	0	0	0	0	0.2	0.3	0.3	0.3	0.4	0.4	1.2	0.5	0.6	0.9	0.8	1.1	1.2	0.8	1.4	0.8	0.3	0.5	0.7	0	1.9	2.1	1.7	7.8
XZ009	申扎县	2020-01-08 07:00:00	0	0	0	0	0	0	0	0	0.2	0.3	0.3	0.3	0.4	0.4	1.2	0.5	0.6	0.9	0.8	1.1	1.2	0.8	1.4	0.8	0.4	0.5	0.7	0	1.9	2.1	1.7	7.8
XZ009	申扎县	2020-01-08 08:00:00	0	0	0	0	0	0	0	0	0.2	0.3	0.3	0.3	0.4	0.4	1.2	0.5	0.6	0.9	0.8	1.1	1.1	0.8	1.4	0.8	0.4	0.5	0.7	0	1.9	2.1	1.7	7.8
XZ009	申扎县	2020-01-08 09:00:00	0	0	0	0	0	0	0	0	0.2	0.3	0.3	0.3	0.4	0.4	1.2	0.5	0.6	0.9	0.8	1.1	1.1	0.8	1.4	0.8	0.4	0.5	0.7	0	1.9	2.1	1.7	7.8
XZ009	申扎县	2020-01-08 10:00:00	0	0	0	0	0	0	0	0	0.1	0.3	0.2	0.3	0.4	0.4	1.2	0.5	0.6	0.9	0.8	1.1	1.1	0.8	1.4	0.8	0.4	0.5	0.7	0	1.9	2.1	1.7	7.8
XZ009	申扎县	2020-01-08 11:00:00	0	0	0	0	0	0	0	0	0.1	0.3	0.2	0.3	0.4	0.4	1.2	0.5	0.6	0.9	0.8	1.1	1.2	0.8	1.4	0.8	0.4	0.5	0.7	0	1.9	2.1	1.6	7.8
XZ009	申扎县	2020-01-08 12:00:00	0	0	0	0	0	0	0	0	0.1	0.2	0.2	0.3	0.4	0.4	1.2	0.5	0.6	0.9	0.8	1.1	1.1	0.8	1.4	0.8	0.4	0.5	0.7	0	1.9	2.1	1.7	7.8
XZ009	申扎县	2020-01-08 13:00:00	0	0	0	0	0	0	0	0	0.1	0.2	0.2	0.3	0.4	0.4	1.2	0.5	0.6	0.9	0.8	1.1	1.1	0.8	1.4	0.8	0.3	0.5	0.7	0	1.9	2.1	1.6	7.7
XZ009	申扎县	2020-01-08 14:00:00	0	0	0	0	0	0	0	0	0.1	0.2	0.2	0.3	0.4	0.4	1.2	0.5	0.6	0.9	0.8	1.1	1.1	0.8	1.4	0.8	0.4	0.5	0.7	0	1.9	2.1	1.6	7.8
XZ009	申扎县	2020-01-08 15:00:00	0	0	0	0	0	0	0	0	0.1	0.2	0.2	0.3	0.4	0.4	1.2	0.5	0.6	0.9	0.8	1.1	1.1	0.8	1.4	0.8	0.4	0.5	0.7	0	1.9	2.1	1.7	7.7
XZ009	申扎县	2020-01-08 16:00:00	0	0	0	0	0	0	0	0	0.2	0.3	0.2	0.3	0.4	0.4	1.2	0.5	0.6	0.9	0.8	1.1	1.1	0.8	1.4	0.8	0.4	0.5	0.7	0	1.9	2.1	1.6	7.7
XZ009	申扎县	2020-01-08 17:00:00	0	0	0	0	0	0	0	0	0.2	0.3	0.3	0.3	0.4	0.4	1.2	0.5	0.6	0.9	0.8	1.1	1.1	0.8	1.4	0.8	0.4	0.5	0.7	0	1.9	2.1	1.6	7.8
XZ009	申扎县	2020-01-08 18:00:00	0	0	0	0	0	0	0	0	0.2	0.3	0.3	0.3	0.4	0.4	1.2	0.5	0.6	0.9	0.8	1.1	1.1	0.8	1.4	0.8	0.4	0.5	0.7	0	1.9	2.1	1.7	7.8
XZ009	申扎县	2020-01-08 19:00:00	0	0	0	0	0	0	0	0	0.2	0.3	0.3	0.3	0.4	0.4	1.2	0.5	0.6	0.9	0.8	1.1	1.1	0.8	1.4	0.8	0.4	0.5	0.7	0	1.9	2.1	1.7	7.8
XZ009	申扎县	2020-01-08 20:00:00	0	0	0	0	0	0	0	0	0.2	0.3	0.3	0.4	0.4	0.4	1.2	0.5	0.6	0.9	0.8	1.1	1.1	0.8	1.4	0.8	0.3	0.5	0.7	0	1.9	2.1	1.7	7.8
XZ009	申扎县	2020-01-08 21:00:00	0	0	0	0	0	0	0	0	0.2	0.3	0.3	0.4	0.4	0.4	1.2	0.5	0.6	0.9	0.8	1.1	1.1	0.8	1.4	0.8	0.3	0.5	0.7	0	1.9	2.1	1.7	7.8
XZ009	申扎县	2020-01-08 22:00:00	0	0	0	0	0	0	0	0	0.2	0.3	0.3	0.4	0.4	0.4	1.2	0.5	0.6	0.9	0.8	1.1	1.1	0.8	1.4	0.8	0.3	0.5	0.7	0	1.9	2.1	1.6	7.8
XZ009	申扎县	2020-01-08 23:00:00	0	0	0	0	0	0	0	0	0.2	0.3	0.3	0.4	0.4	0.4	1.2	0.5	0.6	0.9	0.8	1.1	1.1	0.8	1.4	0.8	0.3	0.5	0.7	0	1.9	2.1	1.6	7.8
XZ009	申扎县	2020-01-09 00:00:00	0	0	0	0	0	0	0	0	0.2	0.3	0.3	0.4	0.4	0.4	1.3	0.5	0.6	0.9	0.8	1.1	1.1	0.8	1.4	0.8	0.4	0.5	0.7	0	1.9	2.1	1.6	7.8
XZ009	申扎县	2020-01-09 01:00:00	0	0	0	0	0	0	0	0	0.2	0.3	0.3	0.4	0.4	0.5	1.3	0.5	0.6	0.9	0.8	1.1	1.1	0.8	1.4	0.8	0.4	0.5	0.7	0	1.9	2.1	1.6	7.8
XZ009	申扎县	2020-01-09 02:00:00	0	0	0	0	0	0	0	0	0.2	0.3	0.3	0.4	0.4	0.5	1.3	0.5	0.6	0.9	0.8	1.1	1.2	0.8	1.4	0.8	0.4	0.5	0.7	0	1.9	2.1	1.6	7.8
XZ009	申扎县	2020-01-09 03:00:00	0	0	0	0	0	0	0	0	0.2	0.3	0.3	0.4	0.4	0.5	1.3	0.5	0.6	0.9	0.8	1.1	1.2	0.8	1.4	0.8	0.4	0.5	0.7	0	1.9	2.1	1.6	7.8
XZ009	申扎县	2020-01-09 04:00:00	0	0	0	0	0	0	0	0	0.2	0.3	0.3	0.4	0.4	0.5	1.3	0.5	0.6	0.9	0.8	1.1	1.2	0.8	1.4	0.8	0.4	0.5	0.7	0	1.9	2.1	1.6	7.8
XZ009	申扎县	2020-01-09 05:00:00	0	0	0	0	0	0	0	0	0.2	0.3	0.3	0.4	0.4	0.5	1.3	0.5	0.6	0.9	0.8	1.1	1.2	0.8	1.4	0.8	0.4	0.5	0.7	0	1.9	2.1	1.6	7.8
XZ009	申扎县	2020-01-09 06:00:00	0	0	0	0	0	0	0	0	0.2	0.3	0.3	0.4	0.4	0.4	1.3	0.5	0.6	0.9	0.8	1.1	1.2	0.8	1.4	0.8	0.4	0.5	0.7	0	1.9	2.1	1.7	7.7
XZ009	申扎县	2020-01-09 07:00:00	0	0	0	0	0	0	0	0	0.2	0.3	0.3	0.3	0.4	0.4	1.3	0.5	0.6	0.9	0.8	1.1	1.2	0.8	1.4	0.8	0.4	0.5	0.7	0	1.9	2.1	1.6	7.8
XZ009	申扎县	2020-01-09 08:00:00	0	0	0	0	0	0	0	0	0.2	0.3	0.3	0.3	0.4	0.4	1.3	0.5	0.6	0.9	0.8	1.1	1.2	0.8	1.4	0.8	0.4	0.5	0.7	0	1.9	2.1	1.7	7.8
XZ009	申扎县	2020-01-09 09:00:00	0	0	0	0	0	0	0	0	0.2	0.3	0.3	0.3	0.4	0.4	1.2	0.5	0.6	0.9	0.8	1.1	1.2	0.8	1.4	0.8	0.4	0.5	0.7	0	1.9	2.1	1.6	7.8
XZ009	申扎县	2020-01-09 10:00:00	0	0	0	0	0	0	0	0	0.1	0.3	0.3	0.3	0.4	0.4	1.2	0.5	0.6	0.9	0.8	1.1	1.1	0.8	1.4	0.8	0.4	0.5	0.7	0	1.9	2.1	1.6	7.8
XZ009	申扎县	2020-01-09 11:00:00	0	0	0	0	0	0	0	0	0.1	0.3	0.3	0.3	0.4	0.4	1.2	0.5	0.6	0.9	0.8	1.1	1.1	0.8	1.4	0.8	0.4	0.5	0.7	0	1.9	2.1	1.6	7.8
XZ009	申扎县	2020-01-09 12:00:00	0	0	0	0	0	0	0	0	0.1	0.2	0.2	0.3	0.4	0.4	1.2	0.5	0.6	0.9	0.8	1.1	1.2	0.8	1.4	0.8	0.4	0.5	0.7	0	1.9	2.1	1.6	7.8
XZ009	申扎县	2020-01-09 13:00:00	0	0	0	0	0	0	0	0	0.1	0.2	0.2	0.3	0.4	0.4	1.2	0.5	0.6	0.9	0.8	1.1	1.2	0.8	1.4	0.8	0.4	0.5	0.7	0	1.9	2.1	1.7	7.8
XZ009	申扎县	2020-01-09 14:00:00	0	0	0	0	0	0	0	0	0.1	0.3	0.2	0.3	0.4	0.4	1.2	0.5	0.6	0.9	0.8	1.1	1.1	0.8	1.4	0.8	0.4	0.5	0.7	0	1.9	2.1	1.6	7.8
XZ009	申扎县	2020-01-09 15:00:00	0	0	0	0	0	0	0	0	0.1	0.3	0.2	0.3	0.4	0.4	1.2	0.5	0.6	0.9	0.8	1.1	1.1	0.8	1.4	0.8	0.4	0.5	0.7	0	1.9	2.1	1.6	7.8
XZ009	申扎县	2020-01-09 16:00:00	0	0	0	0	0	0	0	0	0.2	0.3	0.3	0.3	0.4	0.4	1.2	0.5	0.6	0.9	0.8	1.1	1.2	0.8	1.4	0.8	0.4	0.5	0.7	0	1.9	2.1	1.7	7.8
XZ009	申扎县	2020-01-09 17:00:00	0	0	0	0	0	0	0	0	0.2	0.3	0.3	0.3	0.4	0.4	1.2	0.5	0.6	0.9	0.8	1.1	1.2	0.8	1.4	0.8	0.4	0.5	0.7	0	1.9	2.1	1.7	7.8
XZ009	申扎县	2020-01-09 18:00:00	0	0	0	0	0	0	0	0	0.2	0.3	0.3	0.3	0.4	0.4	1.2	0.5	0.6	0.9	0.8	1.1	1.1	0.8	1.4	0.8	0.3	0.5	0.7	0	1.9	2.1	1.6	7.8
XZ009	申扎县	2020-01-09 19:00:00	0	0	0	0	0	0	0	0	0.2	0.3	0.3	0.4	0.4	0.4	1.2	0.5	0.6	0.9	0.8	1.1	1.1	0.8	1.4	0.8	0.4	0.5	0.7	0	1.9	2.1	1.6	7.7
XZ009	申扎县	2020-01-09 20:00:00	0	0	0	0	0	0	0.1	0	0.2	0.3	0.3	0.4	0.4	0.4	1.2	0.5	0.6	0.9	0.8	1.1	1.1	0.8	1.4	0.8	0.4	0.5	0.7	0	1.9	2.1	1.7	7.8
XZ009	申扎县	2020-01-09 21:00:00	0	0	0	0	0	0	0.1	0	0.2	0.3	0.3	0.4	0.4	0.4	1.3	0.5	0.6	0.9	0.8	1.1	1.2	0.8	1.4	0.8	0.4	0.5	0.7	0	1.9	2.1	1.6	7.8
XZ009	申扎县	2020-01-09 22:00:00	0	0	0	0	0	0	0.1	0	0.2	0.3	0.3	0.4	0.4	0.5	1.2	0.5	0.6	0.9	0.8	1.1	1.1	0.8	1.4	0.8	0.4	0.5	0.7	0	1.9	2.1	1.6	7.8
XZ009	申扎县	2020-01-09 23:00:00	0	0	0	0	0	0	0.1	0	0.2	0.4	0.3	0.4	0.4	0.5	1.3	0.5	0.6	0.9	0.8	1.1	1.2	0.8	1.4	0.8	0.4	0.5	0.7	0	1.9	2.1	1.6	7.8
XZ009	申扎县	2020-01-10 00:00:00	0	0	0	0	0	0	0	0	0.2	0.3	0.3	0.4	0.4	0.5	1.3	0.5	0.6	0.9	0.8	1.1	1.2	0.8	1.4	0.8	0.3	0.5	0.7	0	1.9	2.1	1.6	7.7
XZ009	申扎县	2020-01-10 01:00:00	0	0	0	0	0	0	0	0	0.2	0.3	0.3	0.4	0.4	0.5	1.3	0.5	0.6	0.9	0.8	1.1	1.2	0.8	1.4	0.8	0.4	0.5	0.7	0	1.9	2.1	1.6	7.8
XZ009	申扎县	2020-01-10 02:00:00	0	0	0	0	0	0	0	0	0.2	0.3	0.3	0.4	0.4	0.5	1.3	0.5	0.6	0.9	0.8	1.1	1.2	0.8	1.4	0.8	0.4	0.5	0.7	0	1.9	2.1	1.6	7.7
XZ009	申扎县	2020-01-10 03:00:00	0	0	0	0	0	0	0	0	0.2	0.3	0.3	0.4	0.4	0.5	1.3	0.5	0.6	0.9	0.8	1.1	1.2	0.8	1.4	0.8	0.4	0.5	0.7	0	1.9	2.1	1.6	7.7
XZ009	申扎县	2020-01-10 04:00:00	0	0	0	0	0	0	0	0	0.2	0.3	0.3	0.4	0.4	0.5	1.3	0.5	0.6	0.9	0.8	1.1	1.2	0.8	1.4	0.8	0.4	0.5	0.7	0	1.9	2.1	1.6	7.7
XZ009	申扎县	2020-01-10 05:00:00	0	0	0	0	0	0	0	0	0.2	0.3	0.3	0.4	0.4	0.5	1.3	0.5	0.6	0.9	0.8	1.1	1.2	0.8	1.4	0.8	0.4	0.5	0.7	0	1.9	2.1	1.6	7.7
XZ009	申扎县	2020-01-10 06:00:00	0	0	0	0	0	0	0	0	0.2	0.3	0.3	0.4	0.4	0.5	1.3	0.5	0.6	0.9	0.8	1.1	1.2	0.9	1.4	0.8	0.4	0.5	0.7	0	1.9	2.1	1.6	7.7
XZ009	申扎县	2020-01-10 07:00:00	0	0	0	0	0	0	0	0	0.2	0.3	0.3	0.4	0.4	0.5	1.3	0.5	0.6	0.9	0.8	1.1	1.2	0.8	1.4	0.8	0.4	0.5	0.7	0	1.9	2.1	1.6	7.8
XZ009	申扎县	2020-01-10 08:00:00	0	0	0	0	0	0	0	0	0.2	0.3	0.3	0.4	0.4	0.5	1.3	0.5	0.6	0.9	0.8	1.1	1.2	0.9	1.4	0.8	0.4	0.5	0.7	0	1.9	2.1	1.6	7.8
XZ009	申扎县	2020-01-10 09:00:00	0	0	0	0	0	0	0	0	0.2	0.3	0.3	0.4	0.4	0.5	1.3	0.5	0.6	0.9	0.8	1.1	1.2	0.9	1.4	0.8	0.4	0.5	0.7	0	1.9	2.1	1.6	7.8
XZ009	申扎县	2020-01-10 10:00:00	0	0	0	0	0	0	0	0	0.2	0.3	0.3	0.4	0.4	0.5	1.3	0.5	0.6	1	0.8	1.1	1.2	0.8	1.4	0.8	0.4	0.5	0.7	0	1.9	2.1	1.6	7.8
XZ009	申扎县	2020-01-10 11:00:00	0	0	0	0	0	0	0	0	0.2	0.3	0.3	0.4	0.4	0.5	1.3	0.5	0.6	1	0.8	1.1	1.2	0.9	1.4	0.8	0.4	0.5	0.7	0	1.9	2.1	1.6	7.8
XZ009	申扎县	2020-01-10 12:00:00	0	0	0	0	0	0	0	0	0.1	0.3	0.3	0.3	0.4	0.4	1.2	0.5	0.6	1	0.8	1.1	1.2	0.9	1.4	0.8	0.4	0.5	0.7	0	1.9	2.1	1.6	7.8
XZ009	申扎县	2020-01-10 13:00:00	0	0	0	0	0	0	0	0	0.1	0.3	0.3	0.3	0.4	0.4	1.3	0.5	0.6	0.9	0.8	1.1	1.2	0.8	1.4	0.8	0.4	0.5	0.7	0	1.9	2.1	1.7	7.8
XZ009	申扎县	2020-01-10 14:00:00	0	0	0	0	0	0	0	0	0.2	0.3	0.3	0.3	0.4	0.4	1.3	0.5	0.6	0.9	0.8	1.1	1.2	0.8	1.4	0.8	0.4	0.5	0.7	0	1.9	2.1	1.7	7.8
XZ009	申扎县	2020-01-10 15:00:00	0	0	0	0	0	0	0	0	0.2	0.3	0.3	0.3	0.4	0.4	1.3	0.5	0.6	0.9	0.8	1.1	1.2	0.9	1.4	0.8	0.4	0.5	0.7	0	1.9	2.1	1.6	7.7
XZ009	申扎县	2020-01-10 16:00:00	0	0	0	0	0	0	0	0	0.2	0.3	0.3	0.3	0.4	0.4	1.2	0.5	0.6	1	0.8	1.1	1.2	0.8	1.4	0.8	0.4	0.5	0.7	0	1.9	2.1	1.7	7.8
XZ009	申扎县	2020-01-10 17:00:00	0	0	0	0	0	0	0	0	0.2	0.3	0.3	0.3	0.4	0.4	1.3	0.5	0.6	1	0.8	1.1	1.2	0.8	1.4	0.8	0.4	0.5	0.7	0	1.9	2.1	1.6	7.8
XZ009	申扎县	2020-01-10 18:00:00	0	0	0	0	0	0	0.1	0	0.2	0.3	0.3	0.4	0.4	0.4	1.3	0.5	0.6	0.9	0.8	1.1	1.2	0.8	1.4	0.8	0.4	0.5	0.7	0	1.9	2.1	1.7	7.8
XZ009	申扎县	2020-01-10 19:00:00	0	0	0	0	0	0	0.1	0	0.2	0.3	0.3	0.4	0.4	0.4	1.3	0.5	0.6	0.9	0.8	1.1	1.2	0.8	1.4	0.8	0.4	0.5	0.7	0	1.9	2.1	1.6	7.7
XZ009	申扎县	2020-01-10 20:00:00	0	0	0	0	0	0	0.1	0	0.3	0.4	0.3	0.4	0.4	0.5	1.3	0.5	0.6	0.9	0.8	1.1	1.2	0.8	1.4	0.8	0.4	0.5	0.7	0	1.9	2.1	1.7	7.8
XZ009	申扎县	2020-01-10 21:00:00	0	0	0	0	0	0	0.1	0	0.3	0.4	0.3	0.4	0.4	0.5	1.3	0.5	0.6	0.9	0.8	1.1	1.2	0.8	1.4	0.8	0.4	0.5	0.7	0	1.9	2.1	1.6	7.8
XZ009	申扎县	2020-01-10 22:00:00	0	0	0	0	0	0	0.1	0	0.3	0.4	0.3	0.4	0.4	0.5	1.3	0.5	0.6	0.9	0.8	1.1	1.2	0.8	1.4	0.8	0.4	0.5	0.7	0	1.9	2.1	1.7	7.7
XZ009	申扎县	2020-01-10 23:00:00	0	0	0	0	0	0	0.1	0	0.3	0.4	0.3	0.4	0.4	0.5	1.3	0.5	0.6	0.9	0.8	1.1	1.2	0.8	1.4	0.8	0.4	0.5	0.7	0	1.9	2.1	1.6	7.8
XZ009	申扎县	2020-01-11 00:00:00	0	0	0	0	0	0	0.1	0	0.2	0.4	0.3	0.4	0.4	0.5	1.3	0.5	0.6	0.9	0.8	1.1	1.2	0.8	1.4	0.8	0.4	0.5	0.7	0	1.9	2.1	1.6	7.8
XZ009	申扎县	2020-01-11 01:00:00	0	0	0	0	0	0	0	0	0.2	0.4	0.3	0.4	0.4	0.5	1.3	0.5	0.6	0.9	0.8	1.1	1.2	0.9	1.4	0.8	0.4	0.5	0.7	0	1.9	2.1	1.6	7.7
XZ009	申扎县	2020-01-11 02:00:00	0	0	0	0	0	0	0	0	0.2	0.4	0.3	0.4	0.4	0.5	1.3	0.5	0.6	0.9	0.8	1.1	1.2	0.9	1.4	0.8	0.4	0.5	0.7	0	1.9	2.1	1.7	7.7
XZ009	申扎县	2020-01-11 03:00:00	0	0	0	0	0	0	0	0	0.2	0.3	0.3	0.4	0.4	0.5	1.3	0.5	0.6	0.9	0.9	1.1	1.2	0.9	1.4	0.8	0.4	0.5	0.7	0	1.9	2.1	1.6	7.7
XZ009	申扎县	2020-01-11 04:00:00	0	0	0	0	0	0	0	0	0.2	0.3	0.3	0.4	0.4	0.5	1.3	0.5	0.6	0.9	0.8	1.1	1.2	0.9	1.4	0.8	0.4	0.5	0.7	0	1.9	2.1	1.6	7.7
XZ009	申扎县	2020-01-11 05:00:00	0	0	0	0	0	0	0	0	0.2	0.3	0.3	0.4	0.4	0.5	1.3	0.5	0.6	0.9	0.8	1.2	1.2	0.9	1.4	0.8	0.4	0.5	0.7	0	1.9	2.1	1.6	7.8
XZ009	申扎县	2020-01-11 06:00:00	0	0	0	0	0	0	0	0	0.2	0.3	0.3	0.4	0.4	0.5	1.3	0.5	0.6	0.9	0.8	1.2	1.2	0.9	1.4	0.8	0.4	0.5	0.7	0	1.9	2.1	1.6	7.7
XZ009	申扎县	2020-01-11 07:00:00	0	0	0	0	0	0	0	0	0.1	0.3	0.3	0.4	0.4	0.5	1.3	0.5	0.6	0.9	0.8	1.1	1.2	0.9	1.4	0.8	0.4	0.5	0.7	0	1.9	2.1	1.7	7.8
XZ009	申扎县	2020-01-11 08:00:00	0	0	0	0	0	0	0	0	0.1	0.3	0.2	0.3	0.4	0.4	1.3	0.5	0.6	0.9	0.8	1.2	1.2	0.9	1.4	0.8	0.4	0.5	0.7	0	1.9	2.1	1.6	7.8
XZ009	申扎县	2020-01-11 09:00:00	0	0	0	0	0	0	0	0	0.1	0.2	0.2	0.3	0.4	0.4	1.2	0.5	0.6	0.9	0.8	1.1	1.2	0.9	1.4	0.8	0.4	0.5	0.7	0	1.9	2.1	1.7	7.8
XZ009	申扎县	2020-01-11 10:00:00	0	0	0	0	0	0	0	0	0.1	0.2	0.2	0.3	0.4	0.4	1.2	0.5	0.6	0.9	0.8	1.1	1.2	0.9	1.4	0.8	0.4	0.5	0.7	0	1.9	2.1	1.6	7.8
XZ009	申扎县	2020-01-11 11:00:00	0	0	0	0	0	0	0	0	0.1	0.2	0.2	0.3	0.4	0.4	1.2	0.5	0.6	1	0.8	1.1	1.2	0.9	1.4	0.8	0.4	0.5	0.7	0	1.9	2.1	1.6	7.8
XZ009	申扎县	2020-01-11 12:00:00	0	0	0	0	0	0	0	0	0.1	0.2	0.2	0.3	0.3	0.4	1.2	0.5	0.6	0.9	0.8	1.1	1.2	0.8	1.4	0.8	0.4	0.5	0.7	0	1.9	2.1	1.7	7.8
XZ009	申扎县	2020-01-11 13:00:00	0	0	0	0	0	0	0	0	0.1	0.2	0.2	0.3	0.3	0.4	1.2	0.5	0.6	0.9	0.8	1.1	1.2	0.8	1.4	0.8	0.4	0.5	0.7	0	1.9	2.1	1.6	7.8
XZ009	申扎县	2020-01-11 14:00:00	0	0	0	0	0	0	0	0	0.1	0.2	0.2	0.3	0.3	0.4	1.2	0.5	0.6	0.9	0.8	1.1	1.2	0.8	1.4	0.8	0.4	0.5	0.7	0	1.9	2.1	1.7	7.8
XZ009	申扎县	2020-01-11 15:00:00	0	0	0	0	0	0	0	0	0.1	0.2	0.2	0.3	0.3	0.4	1.2	0.5	0.6	0.9	0.8	1.1	1.1	0.8	1.4	0.8	0.4	0.5	0.7	0	1.9	2.1	1.6	7.8
XZ009	申扎县	2020-01-11 16:00:00	0	0	0	0	0	0	0	0	0.1	0.2	0.2	0.3	0.3	0.4	1.2	0.5	0.6	0.9	0.8	1.1	1.1	0.8	1.4	0.8	0.4	0.5	0.7	0	1.9	2.1	1.7	7.8
XZ009	申扎县	2020-01-11 17:00:00	0	0	0	0	0	0	0	0	0.1	0.2	0.2	0.3	0.3	0.4	1.2	0.5	0.6	0.9	0.8	1.1	1.1	0.8	1.4	0.8	0.4	0.5	0.7	0	1.9	2.1	1.7	7.8
XZ009	申扎县	2020-01-11 18:00:00	0	0	0	0	0	0	0	0	0.2	0.3	0.2	0.3	0.4	0.4	1.2	0.5	0.6	0.9	0.8	1.1	1.1	0.8	1.4	0.8	0.4	0.5	0.7	0	1.9	2.1	1.6	7.8
XZ009	申扎县	2020-01-11 19:00:00	0	0	0	0	0	0	0	0	0.2	0.3	0.3	0.3	0.4	0.4	1.2	0.5	0.6	0.9	0.8	1.1	1.1	0.8	1.3	0.8	0.4	0.5	0.7	0	1.9	2.1	1.7	7.8
XZ009	申扎县	2020-01-11 20:00:00	0	0	0	0	0	0	0	0	0.2	0.3	0.3	0.3	0.4	0.4	1.2	0.5	0.6	0.9	0.8	1.1	1.1	0.8	1.4	0.8	0.4	0.5	0.7	0	1.9	2.1	1.6	7.7
XZ009	申扎县	2020-01-11 21:00:00	0	0	0	0	0	0	0	0	0.2	0.3	0.3	0.3	0.4	0.4	1.2	0.5	0.6	0.9	0.8	1.1	1.1	0.8	1.4	0.8	0.4	0.5	0.7	0	1.9	2.1	1.7	7.7
XZ009	申扎县	2020-01-11 22:00:00	0	0	0	0	0	0	0	0	0.2	0.3	0.3	0.4	0.4	0.4	1.2	0.5	0.6	0.9	0.8	1.1	1.1	0.8	1.4	0.8	0.4	0.5	0.7	0	1.9	2.1	1.6	7.7
XZ009	申扎县	2020-01-11 23:00:00	0	0	0	0	0	0	0	0	0.2	0.3	0.3	0.4	0.4	0.4	1.2	0.5	0.6	0.9	0.8	1.1	1.1	0.8	1.4	0.8	0.3	0.5	0.7	0	1.9	2.1	1.6	7.7
XZ009	申扎县	2020-01-12 00:00:00	0	0	0	0	0	0	0	0	0.2	0.3	0.3	0.4	0.4	0.4	1.2	0.5	0.6	0.9	0.8	1.1	1.1	0.8	1.4	0.8	0.3	0.5	0.7	0	1.9	2.1	1.6	7.7
XZ009	申扎县	2020-01-12 01:00:00	0	0	0	0	0	0	0	0	0.2	0.3	0.3	0.4	0.4	0.4	1.2	0.5	0.6	0.9	0.8	1.1	1.1	0.8	1.4	0.8	0.3	0.5	0.7	0	1.9	2.1	1.6	7.7
XZ009	申扎县	2020-01-12 02:00:00	0	0	0	0	0	0	0	0	0.2	0.3	0.3	0.4	0.4	0.4	1.2	0.5	0.6	0.9	0.8	1.1	1.1	0.8	1.4	0.8	0.3	0.5	0.7	0	1.9	2.1	1.6	7.7
XZ009	申扎县	2020-01-12 03:00:00	0	0	0	0	0	0	0	0	0.2	0.3	0.3	0.4	0.4	0.4	1.2	0.5	0.6	0.9	0.8	1.1	1.2	0.8	1.4	0.8	0.4	0.5	0.7	0	1.9	2.1	1.6	7.7
XZ009	申扎县	2020-01-12 04:00:00	0	0	0	0	0	0	0	0	0.2	0.3	0.3	0.3	0.4	0.4	1.2	0.5	0.6	0.9	0.8	1.1	1.1	0.8	1.4	0.8	0.3	0.5	0.7	0	1.9	2.1	1.6	7.7
XZ009	申扎县	2020-01-12 05:00:00	0	0	0	0	0	0	0	0	0.2	0.3	0.3	0.3	0.4	0.4	1.2	0.5	0.6	0.9	0.8	1.1	1.1	0.8	1.4	0.8	0.4	0.5	0.7	0	1.9	2.1	1.6	7.7
XZ009	申扎县	2020-01-12 06:00:00	0	0	0	0	0	0	0	0	0.1	0.3	0.3	0.3	0.4	0.4	1.2	0.5	0.6	0.9	0.8	1.1	1.2	0.8	1.4	0.8	0.3	0.5	0.7	0	1.9	2.1	1.6	7.7
XZ009	申扎县	2020-01-12 07:00:00	0	0	0	0	0	0	0	0	0.1	0.2	0.3	0.3	0.4	0.4	1.2	0.5	0.6	0.9	0.8	1.1	1.1	0.8	1.4	0.8	0.4	0.5	0.7	0	1.9	2.1	1.6	7.7
XZ009	申扎县	2020-01-12 08:00:00	0	0	0	0	0	0	0	0	0.1	0.2	0.2	0.3	0.4	0.4	1.2	0.5	0.6	0.9	0.8	1.1	1.1	0.8	1.4	0.8	0.3	0.5	0.7	0	1.9	2.1	1.6	7.7
XZ009	申扎县	2020-01-12 09:00:00	0	0	0	0	0	0	0	0	0.1	0.2	0.2	0.3	0.4	0.4	1.2	0.5	0.6	0.9	0.8	1.1	1.1	0.8	1.4	0.8	0.4	0.5	0.7	0	1.8	2.1	1.6	7.7
XZ009	申扎县	2020-01-12 10:00:00	0	0	0	0	0	0	0	0	0.1	0.2	0.2	0.3	0.4	0.4	1.2	0.5	0.6	0.9	0.8	1.1	1.1	0.8	1.4	0.8	0.4	0.5	0.7	0	1.9	2.1	1.6	7.7
XZ009	申扎县	2020-01-12 11:00:00	0	0	0	0	0	0	0	0	0.1	0.2	0.2	0.3	0.3	0.4	1.2	0.5	0.6	0.9	0.8	1.1	1.1	0.8	1.4	0.8	0.3	0.5	0.7	0	1.9	2.1	1.6	7.7
XZ009	申扎县	2020-01-12 12:00:00	0	0	0	0	0	0	0	0	0.1	0.2	0.2	0.3	0.3	0.4	1.2	0.5	0.6	0.9	0.8	1.1	1.1	0.8	1.4	0.8	0.4	0.5	0.7	0	1.9	2.1	1.6	7.7
XZ009	申扎县	2020-01-12 13:00:00	0	0	0	0	0	0	0	0	0.1	0.2	0.2	0.3	0.3	0.4	1.2	0.5	0.6	0.9	0.8	1.1	1.1	0.8	1.4	0.8	0.4	0.5	0.7	0	1.9	2.1	1.6	7.7
XZ009	申扎县	2020-01-12 14:00:00	0	0	0	0	0	0	0	0	0.1	0.2	0.2	0.3	0.3	0.4	1.2	0.5	0.6	0.9	0.8	1.1	1.1	0.8	1.4	0.8	0.3	0.5	0.7	0	1.9	2.1	1.6	7.7
XZ009	申扎县	2020-01-12 15:00:00	0	0	0	0	0	0	0	0	0.1	0.2	0.2	0.3	0.3	0.4	1.2	0.5	0.5	0.9	0.8	1.1	1.1	0.8	1.4	0.8	0.3	0.5	0.7	0	1.9	2.1	1.6	7.7
XZ009	申扎县	2020-01-12 16:00:00	0	0	0	0	0	0	0	0	0.1	0.2	0.2	0.3	0.3	0.4	1.2	0.5	0.5	0.9	0.8	1	1.1	0.8	1.4	0.8	0.3	0.5	0.7	0	1.9	2.1	1.6	7.7
XZ009	申扎县	2020-01-12 17:00:00	0	0	0	0	0	0	0	0	0.2	0.3	0.2	0.3	0.3	0.4	1.2	0.5	0.5	0.9	0.8	1	1.1	0.8	1.3	0.8	0.3	0.5	0.7	0	1.9	2.1	1.6	7.7
XZ009	申扎县	2020-01-12 18:00:00	0	0	0	0	0	0	0	0	0.2	0.3	0.3	0.3	0.4	0.4	1.2	0.5	0.5	0.9	0.8	1	1.1	0.8	1.3	0.8	0.3	0.5	0.7	0	1.9	2.1	1.6	7.7
XZ009	申扎县	2020-01-12 19:00:00	0	0	0	0	0	0	0.1	0	0.2	0.3	0.3	0.3	0.4	0.4	1.2	0.5	0.6	0.9	0.8	1	1.1	0.8	1.3	0.8	0.3	0.5	0.7	0	1.9	2.1	1.6	7.7
XZ009	申扎县	2020-01-12 20:00:00	0	0	0	0	0	0	0.1	0	0.2	0.3	0.3	0.3	0.4	0.4	1.2	0.5	0.6	0.9	0.8	1	1.1	0.8	1.3	0.8	0.3	0.5	0.7	0	1.8	2.1	1.6	7.7
XZ009	申扎县	2020-01-12 21:00:00	0	0	0	0	0	0	0.1	0	0.2	0.3	0.3	0.4	0.4	0.4	1.2	0.5	0.6	0.9	0.8	1.1	1.1	0.8	1.3	0.8	0.3	0.5	0.7	0	1.8	2.1	1.6	7.7
XZ009	申扎县	2020-01-12 22:00:00	0	0	0	0	0	0	0.1	0	0.3	0.4	0.3	0.4	0.4	0.4	1.2	0.5	0.6	0.9	0.8	1.1	1.1	0.8	1.3	0.8	0.3	0.5	0.7	0	1.8	2.1	1.6	7.7
XZ009	申扎县	2020-01-12 23:00:00	0	0	0	0	0	0	0.1	0	0.3	0.4	0.3	0.4	0.4	0.5	1.2	0.5	0.6	0.9	0.8	1.1	1.1	0.8	1.3	0.8	0.3	0.5	0.7	0	1.8	2	1.6	7.7
XZ009	申扎县	2020-01-13 00:00:00	0	0	0	0	0	0	0.1	0	0.3	0.4	0.3	0.4	0.4	0.5	1.2	0.5	0.6	0.9	0.8	1.1	1.1	0.8	1.3	0.8	0.3	0.5	0.7	0	1.8	2.1	1.6	7.7
XZ009	申扎县	2020-01-13 01:00:00	0	0	0	0	0	0	0.1	0	0.2	0.4	0.3	0.4	0.4	0.5	1.3	0.5	0.6	0.9	0.8	1.1	1.1	0.8	1.3	0.8	0.3	0.5	0.7	0	1.8	2	1.6	7.7
XZ009	申扎县	2020-01-13 02:00:00	0	0	0	0	0	0	0.1	0	0.2	0.4	0.3	0.4	0.4	0.5	1.3	0.5	0.6	0.9	0.8	1.1	1.1	0.8	1.3	0.8	0.3	0.5	0.7	0	1.8	2	1.6	7.7
XZ009	申扎县	2020-01-13 03:00:00	0	0	0	0	0	0	0.1	0	0.2	0.4	0.3	0.4	0.4	0.5	1.3	0.5	0.6	0.9	0.8	1.1	1.1	0.8	1.4	0.8	0.3	0.5	0.7	0	1.8	2	1.6	7.7
XZ009	申扎县	2020-01-13 04:00:00	0	0	0	0	0	0	0	0	0.2	0.3	0.3	0.4	0.4	0.5	1.3	0.5	0.6	0.9	0.8	1.1	1.1	0.8	1.4	0.8	0.3	0.5	0.7	0	1.8	2	1.6	7.7
XZ009	申扎县	2020-01-13 05:00:00	0	0	0	0	0	0	0	0	0.2	0.3	0.3	0.4	0.4	0.5	1.3	0.5	0.6	0.9	0.8	1.1	1.2	0.8	1.4	0.8	0.3	0.5	0.7	0	1.8	2	1.5	7.7
XZ009	申扎县	2020-01-13 06:00:00	0	0	0	0	0	0	0	0	0.2	0.3	0.3	0.4	0.4	0.5	1.3	0.5	0.6	0.9	0.8	1.1	1.2	0.8	1.4	0.8	0.3	0.5	0.7	0	1.8	2.1	1.6	7.7
XZ009	申扎县	2020-01-13 07:00:00	0	0	0	0	0	0	0	0	0.2	0.3	0.3	0.4	0.4	0.5	1.3	0.5	0.6	0.9	0.8	1.1	1.2	0.8	1.4	0.8	0.3	0.5	0.7	0	1.8	2	1.6	7.7
XZ009	申扎县	2020-01-13 08:00:00	0	0	0	0	0	0	0	0	0.2	0.3	0.3	0.4	0.4	0.4	1.3	0.5	0.6	0.9	0.8	1.1	1.2	0.8	1.4	0.8	0.3	0.5	0.7	0	1.8	2.1	1.6	7.7
XZ009	申扎县	2020-01-13 09:00:00	0	0	0	0	0	0	0	0	0.2	0.3	0.3	0.4	0.4	0.5	1.3	0.5	0.6	0.9	0.8	1.1	1.2	0.8	1.4	0.8	0.3	0.5	0.7	0	1.8	2	1.6	7.7
XZ009	申扎县	2020-01-13 10:00:00	0	0	0	0	0	0	0	0	0.2	0.3	0.3	0.4	0.4	0.4	1.2	0.5	0.6	0.9	0.8	1.1	1.1	0.8	1.4	0.8	0.3	0.5	0.7	0	1.8	2	1.6	7.7
XZ009	申扎县	2020-01-13 11:00:00	0	0	0	0	0	0	0	0	0.1	0.3	0.3	0.3	0.4	0.4	1.2	0.5	0.6	0.9	0.8	1.1	1.2	0.8	1.4	0.8	0.3	0.5	0.7	0	1.8	2	1.6	7.7
XZ009	申扎县	2020-01-13 12:00:00	0	0	0	0	0	0	0	0	0.1	0.3	0.3	0.3	0.4	0.4	1.2	0.5	0.6	0.9	0.8	1.1	1.1	0.8	1.4	0.8	0.3	0.5	0.7	0	1.8	2	1.6	7.7
XZ009	申扎县	2020-01-13 13:00:00	0	0	0	0	0	0	0	0	0.1	0.3	0.3	0.3	0.4	0.4	1.2	0.5	0.6	0.9	0.8	1.1	1.1	0.8	1.3	0.8	0.3	0.5	0.7	0	1.8	2.1	1.6	7.7
XZ009	申扎县	2020-01-13 14:00:00	0	0	0	0	0	0	0	0	0.2	0.3	0.3	0.3	0.4	0.4	1.2	0.5	0.6	0.9	0.8	1.1	1.2	0.8	1.4	0.8	0.3	0.5	0.7	0	1.8	2.1	1.6	7.7
XZ009	申扎县	2020-01-13 15:00:00	0	0.1	0	0	0	0	0	0	0.2	0.3	0.3	0.3	0.4	0.4	1.2	0.5	0.6	0.9	0.8	1.1	1.1	0.8	1.4	0.8	0.3	0.5	0.7	0	1.8	2	1.6	7.7
XZ009	申扎县	2020-01-13 16:00:00	0	0.1	0	0	0	0	0.1	0	0.2	0.3	0.3	0.3	0.4	0.4	1.3	0.5	0.6	0.9	0.8	1.1	1.1	0.8	1.4	0.8	0.3	0.5	0.7	0	1.8	2.1	1.6	7.7
XZ009	申扎县	2020-01-13 17:00:00	0	0.2	0	0	0	0	0.1	0	0.2	0.3	0.3	0.4	0.4	0.4	1.2	0.5	0.6	0.9	0.8	1.1	1.2	0.8	1.4	0.8	0.3	0.5	0.7	0	1.9	2	1.6	7.7
XZ009	申扎县	2020-01-13 18:00:00	0	0.1	0	0	0	0	0.1	0	0.3	0.4	0.3	0.4	0.4	0.5	1.3	0.5	0.6	0.9	0.8	1.1	1.1	0.8	1.4	0.8	0.3	0.5	0.7	0	1.8	2.1	1.6	7.7
XZ009	申扎县	2020-01-13 19:00:00	0	0.1	0	0	0	0	0.1	0.1	0.3	0.4	0.3	0.4	0.4	0.5	1.3	0.5	0.6	0.9	0.8	1.1	1.2	0.8	1.4	0.8	0.3	0.5	0.7	0	1.8	2.1	1.6	7.7
XZ009	申扎县	2020-01-13 20:00:00	0	0.1	0	0	0	0	0.1	0.1	0.3	0.4	0.3	0.4	0.4	0.5	1.3	0.5	0.6	0.9	0.8	1.1	1.2	0.8	1.4	0.8	0.3	0.5	0.7	0	1.8	2.1	1.6	7.7
XZ009	申扎县	2020-01-13 21:00:00	0	0	0	0	0	0	0.1	0.1	0.3	0.4	0.3	0.4	0.4	0.5	1.3	0.5	0.6	0.9	0.8	1.1	1.2	0.8	1.4	0.8	0.3	0.5	0.7	0	1.9	2.1	1.6	7.7
XZ009	申扎县	2020-01-13 22:00:00	0	0	0	0	0	0	0.1	0.1	0.3	0.5	0.4	0.4	0.5	0.5	1.3	0.5	0.6	0.9	0.8	1.1	1.2	0.8	1.4	0.8	0.3	0.5	0.7	0	1.8	2.1	1.6	7.7
XZ009	申扎县	2020-01-13 23:00:00	0	0	0	0	0	0	0.1	0.1	0.3	0.5	0.4	0.4	0.5	0.5	1.3	0.5	0.6	0.9	0.8	1.1	1.2	0.8	1.4	0.8	0.3	0.5	0.7	0	1.8	2.1	1.6	7.7
XZ009	申扎县	2020-01-14 00:00:00	0	0	0	0	0	0	0.1	0.1	0.3	0.5	0.4	0.4	0.5	0.5	1.3	0.5	0.6	0.9	0.8	1.1	1.2	0.8	1.4	0.8	0.3	0.5	0.7	0	1.8	2.1	1.6	7.7
XZ009	申扎县	2020-01-14 01:00:00	0	0	0	0	0	0	0.1	0.1	0.3	0.5	0.4	0.4	0.5	0.5	1.3	0.6	0.6	0.9	0.8	1.1	1.2	0.9	1.4	0.8	0.4	0.5	0.7	0	1.8	2.1	1.6	7.7
XZ009	申扎县	2020-01-14 02:00:00	0	0	0	0	0	0	0.1	0.1	0.3	0.5	0.4	0.4	0.5	0.5	1.3	0.6	0.6	1	0.8	1.1	1.2	0.8	1.4	0.8	0.4	0.5	0.7	0	1.8	2.1	1.6	7.7
XZ009	申扎县	2020-01-14 03:00:00	0	0	0	0	0	0	0.1	0.1	0.3	0.4	0.3	0.4	0.5	0.5	1.3	0.6	0.6	0.9	0.9	1.2	1.2	0.9	1.4	0.8	0.4	0.5	0.7	0	1.8	2.1	1.6	7.7
XZ009	申扎县	2020-01-14 04:00:00	0	0	0	0	0	0	0.1	0	0.3	0.4	0.4	0.4	0.5	0.5	1.3	0.6	0.6	1	0.8	1.2	1.2	0.9	1.4	0.8	0.4	0.5	0.7	0	1.8	2.1	1.6	7.7
XZ009	申扎县	2020-01-14 05:00:00	0	0	0	0	0	0	0.1	0	0.3	0.4	0.3	0.4	0.5	0.5	1.3	0.6	0.6	1	0.9	1.2	1.2	0.9	1.4	0.8	0.4	0.5	0.7	0	1.8	2.1	1.6	7.7
XZ009	申扎县	2020-01-14 06:00:00	0	0	0	0	0	0	0.1	0	0.3	0.4	0.3	0.4	0.5	0.5	1.3	0.6	0.6	1	0.9	1.2	1.2	0.9	1.4	0.8	0.4	0.5	0.7	0	1.8	2.1	1.6	7.7
XZ009	申扎县	2020-01-14 07:00:00	0	0	0	0	0	0	0	0	0.2	0.4	0.3	0.4	0.5	0.5	1.3	0.6	0.6	1	0.9	1.2	1.2	0.9	1.4	0.8	0.4	0.5	0.7	0	1.8	2.1	1.6	7.7
XZ009	申扎县	2020-01-14 08:00:00	0	0	0	0	0	0	0	0	0.2	0.4	0.3	0.4	0.5	0.5	1.3	0.6	0.6	1	0.9	1.2	1.2	0.9	1.4	0.8	0.4	0.5	0.7	0	1.8	2.1	1.6	7.7
XZ009	申扎县	2020-01-14 09:00:00	0	0	0	0	0	0	0	0	0.2	0.4	0.3	0.4	0.5	0.5	1.3	0.6	0.6	1	0.9	1.2	1.2	0.9	1.4	0.8	0.4	0.5	0.7	0	1.8	2.1	1.6	7.7
XZ009	申扎县	2020-01-14 10:00:00	0	0	0	0	0	0	0	0	0.2	0.3	0.3	0.4	0.4	0.5	1.3	0.6	0.6	1	0.9	1.2	1.2	0.9	1.4	0.8	0.4	0.5	0.7	0	1.9	2.1	1.6	7.7
XZ009	申扎县	2020-01-14 11:00:00	0	0	0	0	0	0	0	0	0.2	0.3	0.3	0.4	0.4	0.5	1.3	0.6	0.6	1	0.9	1.2	1.2	0.9	1.4	0.8	0.4	0.5	0.7	0	1.8	2.1	1.6	7.7
XZ009	申扎县	2020-01-14 12:00:00	0	0	0	0	0	0	0	0	0.2	0.3	0.3	0.4	0.4	0.5	1.3	0.6	0.6	1	0.9	1.2	1.2	0.9	1.4	0.9	0.4	0.5	0.7	0	1.9	2.1	1.6	7.7
XZ009	申扎县	2020-01-14 13:00:00	0	0	0	0	0	0	0	0	0.2	0.3	0.3	0.4	0.4	0.5	1.3	0.6	0.6	1	0.8	1.2	1.2	0.9	1.4	0.8	0.4	0.5	0.7	0	1.8	2.1	1.6	7.7
XZ009	申扎县	2020-01-14 14:00:00	0	0	0	0	0	0	0	0	0.2	0.3	0.3	0.4	0.4	0.5	1.3	0.5	0.6	1	0.9	1.2	1.2	0.9	1.4	0.9	0.4	0.5	0.7	0	1.8	2.1	1.6	7.7
XZ009	申扎县	2020-01-14 15:00:00	0	0	0	0	0	0	0.1	0	0.2	0.3	0.3	0.4	0.4	0.5	1.3	0.5	0.6	1	0.8	1.2	1.2	0.9	1.4	0.9	0.4	0.5	0.7	0	1.8	2.1	1.6	7.7
XZ009	申扎县	2020-01-14 16:00:00	0	0	0	0	0	0	0.1	0	0.2	0.3	0.3	0.4	0.4	0.5	1.3	0.5	0.6	1	0.8	1.2	1.2	0.9	1.4	0.9	0.4	0.5	0.7	0	1.8	2.1	1.6	7.7
XZ009	申扎县	2020-01-14 17:00:00	0	0.1	0	0	0	0	0.1	0	0.3	0.4	0.3	0.4	0.4	0.5	1.3	0.5	0.6	1	0.9	1.2	1.2	0.9	1.4	0.8	0.4	0.5	0.7	0	1.8	2.1	1.6	7.7
XZ009	申扎县	2020-01-14 18:00:00	0	0.1	0	0	0	0	0.1	0	0.3	0.4	0.3	0.4	0.4	0.5	1.3	0.5	0.6	1	0.9	1.2	1.2	0.9	1.4	0.9	0.4	0.5	0.7	0	1.8	2.1	1.6	7.7
XZ009	申扎县	2020-01-14 19:00:00	0	0.1	0	0	0	0	0.1	0.1	0.3	0.4	0.3	0.4	0.5	0.5	1.3	0.6	0.6	1	0.8	1.2	1.2	0.9	1.4	0.8	0.4	0.5	0.7	0	1.8	2.1	1.6	7.7
XZ009	申扎县	2020-01-14 20:00:00	0	0	0	0	0	0	0.1	0.1	0.3	0.4	0.4	0.4	0.5	0.5	1.3	0.6	0.6	1	0.9	1.2	1.2	0.9	1.4	0.8	0.4	0.5	0.7	0	1.9	2.1	1.6	7.7
XZ009	申扎县	2020-01-14 21:00:00	0	0	0	0	0	0	0.1	0.1	0.3	0.5	0.4	0.4	0.5	0.5	1.3	0.6	0.6	1	0.9	1.2	1.2	0.9	1.4	0.9	0.4	0.5	0.7	0	1.8	2.1	1.6	7.7
XZ009	申扎县	2020-01-14 22:00:00	0	0	0	0	0	0	0.1	0.1	0.3	0.5	0.4	0.4	0.5	0.5	1.3	0.6	0.6	1	0.9	1.2	1.2	0.9	1.4	0.9	0.4	0.5	0.7	0	1.9	2.1	1.7	7.7
XZ009	申扎县	2020-01-14 23:00:00	0	0	0	0	0	0	0.1	0.1	0.3	0.5	0.4	0.4	0.5	0.5	1.3	0.6	0.6	1	0.9	1.2	1.2	0.9	1.4	0.9	0.4	0.5	0.7	0	1.8	2.1	1.6	7.7
XZ009	申扎县	2020-01-15 00:00:00	0	0	0	0	0	0	0.1	0.1	0.3	0.5	0.4	0.4	0.5	0.5	1.3	0.6	0.6	1	0.9	1.2	1.2	0.9	1.4	0.9	0.4	0.5	0.7	0	1.9	2.1	1.6	7.7
XZ009	申扎县	2020-01-15 01:00:00	0	0	0	0	0	0	0.1	0.1	0.3	0.5	0.4	0.4	0.5	0.5	1.3	0.6	0.6	1	0.9	1.2	1.2	0.9	1.4	0.9	0.4	0.5	0.7	0	1.8	2.1	1.7	7.7
XZ009	申扎县	2020-01-15 02:00:00	0	0	0	0	0	0	0.1	0.1	0.3	0.5	0.4	0.5	0.5	0.5	1.3	0.6	0.6	1	0.9	1.2	1.2	0.9	1.4	0.9	0.4	0.5	0.7	0	1.8	2.1	1.6	7.7
XZ009	申扎县	2020-01-15 03:00:00	0	0	0	0	0	0	0.1	0	0.3	0.4	0.4	0.5	0.5	0.5	1.3	0.6	0.6	1	0.9	1.2	1.2	0.9	1.4	0.9	0.4	0.5	0.7	0	1.9	2.1	1.6	7.7
XZ009	申扎县	2020-01-15 04:00:00	0	0	0	0	0	0	0.1	0	0.3	0.4	0.4	0.4	0.5	0.5	1.3	0.6	0.6	1	0.9	1.2	1.2	0.9	1.4	0.9	0.4	0.5	0.7	0	1.8	2.1	1.7	7.7
XZ009	申扎县	2020-01-15 05:00:00	0	0	0	0	0	0	0.1	0	0.3	0.4	0.4	0.4	0.5	0.5	1.3	0.6	0.6	1	0.9	1.2	1.2	0.9	1.5	0.9	0.4	0.5	0.7	0	1.8	2.1	1.7	7.7
XZ009	申扎县	2020-01-15 06:00:00	0	0	0	0	0	0	0.1	0	0.3	0.4	0.3	0.4	0.5	0.5	1.3	0.6	0.6	1	0.9	1.2	1.2	0.9	1.4	0.9	0.4	0.5	0.7	0	1.8	2.1	1.6	7.7
XZ009	申扎县	2020-01-15 07:00:00	0	0	0	0	0	0	0.1	0	0.2	0.4	0.3	0.4	0.5	0.5	1.3	0.6	0.6	1	0.9	1.2	1.2	0.9	1.4	0.9	0.4	0.5	0.7	0	1.8	2.1	1.6	7.7
XZ009	申扎县	2020-01-15 08:00:00	0	0	0	0	0	0	0	0	0.2	0.4	0.3	0.4	0.5	0.5	1.3	0.6	0.6	1	0.9	1.2	1.2	0.9	1.4	0.9	0.4	0.5	0.7	0	1.8	2.1	1.6	7.7
XZ009	申扎县	2020-01-15 09:00:00	0	0	0	0	0	0	0	0	0.2	0.4	0.3	0.4	0.5	0.5	1.3	0.6	0.6	1	0.9	1.2	1.2	0.9	1.4	0.9	0.4	0.5	0.7	0	1.8	2.1	1.6	7.7
XZ009	申扎县	2020-01-15 10:00:00	0	0	0	0	0	0	0	0	0.2	0.4	0.3	0.4	0.4	0.5	1.3	0.6	0.6	1	0.9	1.2	1.2	0.9	1.4	0.9	0.4	0.5	0.7	0	1.8	2.1	1.6	7.7
XZ009	申扎县	2020-01-15 11:00:00	0	0	0	0	0	0	0	0	0.2	0.3	0.3	0.4	0.4	0.5	1.3	0.6	0.6	1	0.9	1.2	1.2	0.9	1.4	0.9	0.4	0.5	0.7	0	1.9	2.1	1.7	7.7
XZ009	申扎县	2020-01-15 12:00:00	0	0	0	0	0	0	0	0	0.2	0.3	0.3	0.4	0.4	0.5	1.3	0.6	0.6	1	0.9	1.2	1.2	0.9	1.5	0.9	0.4	0.5	0.7	0	1.8	2.1	1.7	7.7
XZ009	申扎县	2020-01-15 13:00:00	0	0	0	0	0	0	0	0	0.2	0.3	0.3	0.4	0.4	0.5	1.3	0.6	0.6	1	0.9	1.2	1.2	0.9	1.4	0.9	0.4	0.5	0.7	0	1.8	2.1	1.7	7.7
XZ009	申扎县	2020-01-15 14:00:00	0	0	0	0	0	0	0	0	0.2	0.3	0.3	0.4	0.4	0.5	1.3	0.6	0.6	1	0.9	1.2	1.2	0.9	1.4	0.9	0.4	0.5	0.8	0	1.9	2.1	1.7	7.7
XZ009	申扎县	2020-01-15 15:00:00	0	0	0	0	0	0	0	0	0.2	0.3	0.3	0.4	0.4	0.5	1.3	0.6	0.6	1	0.9	1.2	1.2	0.9	1.4	0.9	0.4	0.5	0.7	0	1.9	2.1	1.7	7.7
XZ009	申扎县	2020-01-15 16:00:00	0	0	0	0	0	0	0.1	0	0.2	0.4	0.3	0.4	0.4	0.5	1.3	0.5	0.6	1	0.9	1.2	1.2	0.9	1.4	0.9	0.4	0.5	0.7	0	1.9	2.1	1.7	7.7
XZ009	申扎县	2020-01-15 17:00:00	0	0.1	0	0	0	0	0.1	0	0.3	0.4	0.3	0.4	0.4	0.5	1.3	0.6	0.6	1	0.9	1.2	1.2	0.9	1.4	0.9	0.4	0.5	0.7	0	1.9	2.1	1.7	7.7
XZ009	申扎县	2020-01-15 18:00:00	0	0.1	0	0	0	0	0.1	0.1	0.3	0.4	0.3	0.4	0.4	0.5	1.3	0.6	0.6	1	0.9	1.2	1.2	0.9	1.4	0.9	0.4	0.5	0.7	0	1.8	2.1	1.7	7.7
XZ009	申扎县	2020-01-15 19:00:00	0	0.1	0	0	0	0	0.1	0.1	0.3	0.4	0.3	0.4	0.5	0.5	1.3	0.6	0.6	1	0.9	1.2	1.2	0.9	1.4	0.9	0.4	0.5	0.7	0	1.8	2.1	1.7	7.7
XZ009	申扎县	2020-01-15 20:00:00	0	0	0	0	0	0	0.1	0.1	0.3	0.4	0.4	0.4	0.5	0.5	1.3	0.6	0.6	1	0.9	1.2	1.2	0.9	1.4	0.9	0.4	0.5	0.7	0	1.8	2.1	1.7	7.7
XZ009	申扎县	2020-01-15 21:00:00	0	0	0	0	0	0	0.1	0.1	0.3	0.5	0.4	0.4	0.5	0.5	1.3	0.6	0.6	1	0.9	1.2	1.2	0.9	1.4	0.9	0.4	0.5	0.7	0	1.8	2.1	1.7	7.7
XZ009	申扎县	2020-01-15 22:00:00	0	0	0	0	0	0	0.1	0.1	0.3	0.5	0.4	0.4	0.5	0.5	1.3	0.6	0.6	1	0.9	1.2	1.2	0.9	1.4	0.9	0.4	0.5	0.7	0	1.8	2.1	1.7	7.7
XZ009	申扎县	2020-01-15 23:00:00	0	0	0	0	0	0	0.1	0.1	0.3	0.5	0.4	0.5	0.5	0.5	1.3	0.6	0.6	1	0.9	1.2	1.2	0.9	1.4	0.9	0.4	0.5	0.7	0	1.8	2.1	1.7	7.7
XZ009	申扎县	2020-01-16 00:00:00	0	0	0	0	0	0	0.1	0.1	0.3	0.5	0.4	0.5	0.5	0.5	1.3	0.6	0.6	1	0.9	1.2	1.2	0.9	1.4	0.9	0.4	0.5	0.7	0	1.8	2.1	1.7	7.7
XZ009	申扎县	2020-01-16 01:00:00	0	0	0	0	0	0	0.1	0.1	0.3	0.5	0.4	0.5	0.5	0.5	1.3	0.6	0.6	1	0.9	1.2	1.2	0.9	1.4	0.9	0.4	0.5	0.7	0	1.8	2.1	1.7	7.7
XZ009	申扎县	2020-01-16 02:00:00	0	0	0	0	0	0	0.1	0.1	0.3	0.5	0.4	0.5	0.5	0.5	1.3	0.6	0.7	1	0.9	1.2	1.2	0.9	1.4	0.9	0.4	0.5	0.7	0	1.8	2.1	1.7	7.7
XZ009	申扎县	2020-01-16 03:00:00	0	0	0	0	0	0	0.1	0	0.3	0.4	0.4	0.4	0.5	0.5	1.3	0.6	0.7	1	0.9	1.2	1.2	0.9	1.4	0.9	0.4	0.5	0.7	0	1.8	2.1	1.7	7.7
XZ009	申扎县	2020-01-16 04:00:00	0	0	0	0	0	0	0.1	0	0.3	0.4	0.4	0.4	0.5	0.5	1.3	0.6	0.7	1	0.9	1.2	1.2	0.9	1.5	0.9	0.4	0.5	0.7	0	1.8	2.1	1.7	7.7
XZ009	申扎县	2020-01-16 05:00:00	0	0	0	0	0	0	0.1	0	0.3	0.4	0.3	0.4	0.5	0.5	1.3	0.6	0.7	1	0.9	1.2	1.2	0.9	1.4	0.9	0.4	0.5	0.7	0	1.8	2.1	1.7	7.7
XZ009	申扎县	2020-01-16 06:00:00	0	0	0	0	0	0	0	0	0.2	0.4	0.3	0.4	0.5	0.5	1.3	0.6	0.7	1	0.9	1.2	1.2	0.9	1.5	0.9	0.4	0.5	0.7	0	1.8	2.1	1.7	7.7
XZ009	申扎县	2020-01-16 07:00:00	0	0	0	0	0	0	0	0	0.2	0.4	0.3	0.4	0.5	0.5	1.3	0.6	0.7	1	0.9	1.2	1.2	0.9	1.5	0.9	0.4	0.5	0.7	0	1.8	2.1	1.7	7.7
XZ009	申扎县	2020-01-16 08:00:00	0	0	0	0	0	0	0	0	0.2	0.4	0.3	0.4	0.5	0.5	1.3	0.6	0.7	1	0.9	1.2	1.2	0.9	1.5	0.9	0.4	0.5	0.7	0	1.8	2.1	1.7	7.7
XZ009	申扎县	2020-01-16 09:00:00	0	0	0	0	0	0	0	0	0.2	0.3	0.3	0.4	0.4	0.5	1.3	0.6	0.7	1	0.9	1.2	1.2	0.9	1.5	0.9	0.4	0.5	0.7	0	1.8	2.1	1.7	7.7
XZ009	申扎县	2020-01-16 10:00:00	0	0	0	0	0	0	0	0	0.2	0.3	0.3	0.4	0.4	0.5	1.3	0.6	0.6	1	0.9	1.2	1.2	0.9	1.5	0.9	0.4	0.5	0.7	0	1.8	2.1	1.7	7.7
XZ009	申扎县	2020-01-16 11:00:00	0	0	0	0	0	0	0	0	0.2	0.3	0.3	0.4	0.4	0.5	1.3	0.6	0.6	1	0.9	1.2	1.2	0.9	1.5	0.9	0.4	0.5	0.7	0	1.8	2.1	1.7	7.7
XZ009	申扎县	2020-01-16 12:00:00	0	0	0	0	0	0	0	0	0.2	0.3	0.3	0.4	0.4	0.5	1.3	0.6	0.6	1	0.9	1.2	1.2	0.9	1.5	0.9	0.4	0.5	0.7	0	1.8	2.1	1.7	7.7
XZ009	申扎县	2020-01-16 13:00:00	0	0	0	0	0	0	0	0	0.2	0.3	0.3	0.4	0.4	0.5	1.3	0.6	0.6	1	0.9	1.2	1.2	0.9	1.5	0.9	0.4	0.5	0.7	0	1.8	2.1	1.7	7.7
XZ009	申扎县	2020-01-16 14:00:00	0	0	0	0	0	0	0	0	0.2	0.3	0.3	0.4	0.4	0.5	1.3	0.6	0.6	1	0.9	1.2	1.2	0.9	1.5	0.9	0.4	0.5	0.7	0	1.8	2.1	1.7	7.7
XZ009	申扎县	2020-01-16 15:00:00	0	0	0	0	0	0	0	0	0.2	0.3	0.3	0.4	0.4	0.5	1.3	0.6	0.6	1	0.9	1.2	1.2	0.9	1.5	0.9	0.4	0.5	0.7	0	1.8	2.2	1.7	7.7
XZ009	申扎县	2020-01-16 16:00:00	0	0.1	0	0	0	0	0.1	0	0.2	0.3	0.3	0.4	0.4	0.5	1.3	0.6	0.6	1	0.9	1.2	1.2	0.9	1.4	0.9	0.4	0.6	0.7	0	1.8	2.1	1.7	7.7
XZ009	申扎县	2020-01-16 17:00:00	0	0.1	0	0	0	0	0.1	0	0.3	0.4	0.3	0.4	0.4	0.5	1.3	0.6	0.6	1	0.9	1.2	1.2	0.9	1.4	0.9	0.4	0.5	0.7	0	1.8	2.1	1.7	7.7
XZ009	申扎县	2020-01-16 18:00:00	0	0.1	0	0	0	0	0.1	0.1	0.3	0.4	0.3	0.4	0.4	0.5	1.3	0.6	0.6	1	0.9	1.2	1.2	0.9	1.4	0.9	0.4	0.5	0.7	0	1.8	2.1	1.7	7.7
XZ009	申扎县	2020-01-16 19:00:00	0	0.1	0	0	0	0	0.1	0.1	0.3	0.4	0.3	0.4	0.4	0.5	1.3	0.6	0.6	1	0.9	1.2	1.2	0.9	1.4	0.9	0.4	0.5	0.7	0	1.8	2.1	1.7	7.7
XZ009	申扎县	2020-01-16 20:00:00	0	0	0	0	0	0	0.1	0.1	0.3	0.4	0.4	0.4	0.5	0.5	1.3	0.6	0.6	1	0.9	1.2	1.2	0.9	1.4	0.9	0.4	0.5	0.7	0	1.8	2.1	1.7	7.7
XZ009	申扎县	2020-01-16 21:00:00	0	0	0	0	0	0	0.1	0.1	0.3	0.5	0.4	0.4	0.5	0.5	1.3	0.6	0.6	1	0.9	1.2	1.2	0.9	1.4	0.9	0.4	0.5	0.7	0	1.8	2.1	1.7	7.7
XZ009	申扎县	2020-01-16 22:00:00	0	0	0	0	0	0	0.1	0.1	0.3	0.5	0.4	0.4	0.5	0.5	1.3	0.6	0.6	1	0.9	1.2	1.2	0.9	1.4	0.9	0.4	0.5	0.7	0	1.8	2.1	1.7	7.7
XZ009	申扎县	2020-01-16 23:00:00	0	0	0	0	0	0	0.1	0.1	0.3	0.5	0.4	0.5	0.5	0.5	1.3	0.6	0.6	1	0.9	1.2	1.2	0.9	1.4	0.9	0.4	0.5	0.7	0	1.8	2.1	1.7	7.7
XZ009	申扎县	2020-01-17 00:00:00	0	0	0	0	0	0	0.1	0.1	0.3	0.5	0.4	0.5	0.5	0.5	1.3	0.6	0.6	1	0.9	1.2	1.2	0.9	1.4	0.9	0.4	0.5	0.7	0	1.8	2.1	1.7	7.7
XZ009	申扎县	2020-01-17 01:00:00	0	0	0	0	0	0	0.1	0.1	0.3	0.5	0.4	0.5	0.5	0.5	1.4	0.6	0.6	1	0.9	1.2	1.2	0.9	1.4	0.9	0.4	0.5	0.7	0	1.8	2.1	1.7	7.7
XZ009	申扎县	2020-01-17 02:00:00	0	0	0	0	0	0	0.1	0.1	0.3	0.5	0.4	0.5	0.5	0.5	1.3	0.6	0.7	1	0.9	1.2	1.2	0.9	1.5	0.9	0.4	0.5	0.7	0	1.8	2.1	1.7	7.7
XZ009	申扎县	2020-01-17 03:00:00	0	0	0	0	0	0	0.1	0.1	0.3	0.5	0.4	0.5	0.5	0.5	1.4	0.6	0.7	1	0.9	1.2	1.2	0.9	1.5	0.9	0.4	0.5	0.7	0	1.8	2.1	1.7	7.7
XZ009	申扎县	2020-01-17 04:00:00	0	0	0	0	0	0	0.1	0.1	0.3	0.5	0.4	0.5	0.5	0.5	1.4	0.6	0.7	1	0.9	1.2	1.2	0.9	1.5	0.9	0.4	0.5	0.7	0	1.8	2.1	1.7	7.7
XZ009	申扎县	2020-01-17 05:00:00	0	0	0	0	0	0	0.1	0.1	0.3	0.5	0.4	0.5	0.5	0.5	1.4	0.6	0.7	1	0.9	1.2	1.2	0.9	1.5	0.9	0.4	0.5	0.7	0	1.8	2.1	1.7	7.7
XZ009	申扎县	2020-01-17 06:00:00	0	0	0	0	0	0	0.1	0	0.3	0.4	0.4	0.5	0.5	0.5	1.4	0.6	0.7	1	0.9	1.3	1.2	0.9	1.5	0.9	0.4	0.5	0.7	0	1.8	2.1	1.7	7.7
XZ009	申扎县	2020-01-17 07:00:00	0	0	0	0	0	0	0.1	0	0.3	0.4	0.4	0.5	0.5	0.5	1.4	0.6	0.7	1	0.9	1.3	1.2	0.9	1.5	0.9	0.4	0.5	0.7	0	1.8	2.1	1.7	7.7
XZ009	申扎县	2020-01-17 08:00:00	0	0	0	0	0	0	0.1	0	0.3	0.4	0.4	0.4	0.5	0.5	1.3	0.6	0.7	1	0.9	1.2	1.2	0.9	1.5	0.9	0.4	0.5	0.7	0	1.8	2.1	1.7	7.7
XZ009	申扎县	2020-01-17 09:00:00	0	0	0	0	0	0	0.1	0	0.3	0.4	0.4	0.4	0.5	0.5	1.3	0.6	0.7	1	0.9	1.2	1.2	0.9	1.5	0.9	0.4	0.5	0.7	0	1.8	2.1	1.7	7.7
XZ009	申扎县	2020-01-17 10:00:00	0	0	0	0	0	0	0.1	0	0.2	0.4	0.3	0.4	0.5	0.5	1.3	0.6	0.7	1	0.9	1.2	1.2	0.9	1.5	0.9	0.4	0.5	0.7	0	1.8	2.1	1.7	7.7
XZ009	申扎县	2020-01-17 11:00:00	0	0	0	0	0	0	0	0	0.2	0.4	0.3	0.4	0.5	0.5	1.3	0.6	0.7	1	0.9	1.3	1.3	0.9	1.5	0.9	0.4	0.5	0.7	0	1.8	2.1	1.7	7.8
XZ009	申扎县	2020-01-17 12:00:00	0	0	0	0	0	0	0	0	0.2	0.4	0.3	0.4	0.5	0.5	1.3	0.6	0.7	1	0.9	1.2	1.3	0.9	1.5	0.9	0.4	0.5	0.7	0	1.8	2.1	1.7	7.7
XZ009	申扎县	2020-01-17 13:00:00	0	0	0	0	0	0	0	0	0.2	0.4	0.3	0.4	0.5	0.5	1.3	0.6	0.6	1	0.9	1.2	1.2	0.9	1.5	0.9	0.4	0.5	0.7	0	1.8	2.2	1.7	7.7
XZ009	申扎县	2020-01-17 14:00:00	0	0	0	0	0	0	0.1	0	0.2	0.4	0.3	0.4	0.5	0.5	1.3	0.6	0.7	1	0.9	1.2	1.2	0.9	1.5	0.9	0.4	0.5	0.7	0	1.8	2.1	1.7	7.8
XZ009	申扎县	2020-01-17 15:00:00	0	0	0	0	0	0	0.1	0	0.3	0.4	0.3	0.4	0.5	0.5	1.3	0.6	0.6	1	0.9	1.3	1.3	0.9	1.5	0.9	0.4	0.5	0.7	0	1.8	2.2	1.7	7.8
XZ009	申扎县	2020-01-17 16:00:00	0	0	0	0	0	0	0.1	0	0.3	0.4	0.3	0.4	0.5	0.5	1.3	0.6	0.6	1	0.9	1.2	1.2	0.9	1.5	0.9	0.4	0.6	0.7	0	1.8	2.2	1.7	7.7
XZ009	申扎县	2020-01-17 17:00:00	0	0	0	0	0	0	0.1	0.1	0.3	0.4	0.3	0.4	0.5	0.5	1.3	0.6	0.6	1	0.9	1.2	1.2	0.9	1.5	0.9	0.4	0.6	0.7	0	1.8	2.2	1.7	7.8
XZ009	申扎县	2020-01-17 18:00:00	0	0	0	0	0	0	0.1	0.1	0.3	0.4	0.4	0.4	0.5	0.5	1.3	0.6	0.6	1	0.9	1.2	1.2	0.9	1.5	0.9	0.4	0.5	0.7	0	1.8	2.2	1.7	7.8
XZ009	申扎县	2020-01-17 19:00:00	0	0	0	0	0	0	0.1	0.1	0.3	0.5	0.4	0.4	0.5	0.5	1.3	0.6	0.6	1	0.9	1.2	1.2	0.9	1.5	0.9	0.4	0.5	0.7	0	1.8	2.2	1.7	7.8
XZ009	申扎县	2020-01-17 20:00:00	0	0	0	0	0	0	0.1	0.1	0.3	0.5	0.4	0.4	0.5	0.5	1.3	0.6	0.7	1	0.9	1.2	1.2	0.9	1.5	0.9	0.4	0.5	0.7	0	1.8	2.2	1.7	7.8
XZ009	申扎县	2020-01-17 21:00:00	0	0	0	0	0	0	0.1	0.1	0.3	0.5	0.4	0.5	0.5	0.5	1.3	0.6	0.7	1	0.9	1.2	1.2	0.9	1.5	0.9	0.4	0.5	0.7	0	1.8	2.2	1.7	7.7
XZ009	申扎县	2020-01-17 22:00:00	0	0	0	0	0	0	0.1	0.1	0.3	0.5	0.4	0.5	0.5	0.5	1.4	0.6	0.7	1	0.9	1.2	1.2	0.9	1.5	0.9	0.4	0.6	0.7	0	1.8	2.2	1.7	7.7
XZ009	申扎县	2020-01-17 23:00:00	0	0	0	0	0	0	0.1	0.1	0.3	0.5	0.4	0.5	0.5	0.5	1.4	0.6	0.7	1	0.9	1.3	1.2	0.9	1.5	0.9	0.4	0.5	0.7	0	1.8	2.2	1.7	7.8
XZ009	申扎县	2020-01-18 00:00:00	0	0	0	0	0	0	0.1	0.1	0.3	0.5	0.4	0.5	0.5	0.5	1.4	0.6	0.7	1	0.9	1.3	1.3	0.9	1.5	0.9	0.4	0.5	0.7	0	1.8	2.2	1.7	7.8
XZ009	申扎县	2020-01-18 01:00:00	0	0	0	0	0	0	0.1	0.1	0.3	0.5	0.4	0.5	0.5	0.5	1.4	0.6	0.7	1	0.9	1.3	1.3	0.9	1.5	0.9	0.4	0.5	0.7	0	1.8	2.2	1.7	7.7
XZ009	申扎县	2020-01-18 02:00:00	0	0	0	0	0	0	0.1	0.1	0.3	0.5	0.4	0.5	0.5	0.5	1.4	0.6	0.7	1	0.9	1.3	1.3	1	1.5	0.9	0.4	0.5	0.7	0	1.8	2.2	1.7	7.8
XZ009	申扎县	2020-01-18 03:00:00	0	0	0	0	0	0	0.1	0.1	0.3	0.5	0.4	0.5	0.5	0.5	1.4	0.6	0.7	1	0.9	1.3	1.3	1	1.5	0.9	0.4	0.5	0.7	0	1.8	2.2	1.7	7.8
XZ009	申扎县	2020-01-18 04:00:00	0	0	0	0	0	0	0.1	0.1	0.3	0.5	0.4	0.5	0.5	0.5	1.4	0.6	0.7	1	0.9	1.3	1.3	1	1.5	0.9	0.4	0.5	0.7	0	1.8	2.2	1.7	7.7
XZ009	申扎县	2020-01-18 05:00:00	0	0	0	0	0	0	0.1	0.1	0.3	0.5	0.4	0.5	0.5	0.5	1.4	0.6	0.7	1	0.9	1.3	1.3	1	1.5	0.9	0.4	0.5	0.7	0	1.8	2.2	1.7	7.8
XZ009	申扎县	2020-01-18 06:00:00	0	0	0	0	0	0	0.1	0	0.3	0.5	0.4	0.5	0.5	0.5	1.4	0.6	0.7	1	0.9	1.3	1.3	1	1.5	0.9	0.4	0.5	0.7	0	1.8	2.2	1.7	7.8
XZ009	申扎县	2020-01-18 07:00:00	0	0	0	0	0	0	0.1	0	0.3	0.4	0.4	0.5	0.5	0.5	1.4	0.6	0.7	1	0.9	1.3	1.3	1	1.5	0.9	0.4	0.5	0.7	0	1.8	2.2	1.7	7.8
XZ009	申扎县	2020-01-18 08:00:00	0	0	0	0	0	0	0.1	0	0.3	0.4	0.4	0.5	0.5	0.5	1.4	0.6	0.7	1	0.9	1.3	1.3	1	1.5	0.9	0.4	0.6	0.8	0	1.8	2.2	1.7	7.8
XZ009	申扎县	2020-01-18 09:00:00	0	0	0	0	0	0	0.1	0	0.3	0.4	0.4	0.4	0.5	0.5	1.4	0.6	0.7	1	0.9	1.3	1.3	1	1.5	0.9	0.4	0.6	0.7	0	1.8	2.2	1.7	7.8
XZ009	申扎县	2020-01-18 10:00:00	0	0	0	0	0	0	0.1	0	0.3	0.4	0.4	0.4	0.5	0.5	1.4	0.6	0.7	1	0.9	1.3	1.3	1	1.5	0.9	0.4	0.6	0.8	0	1.8	2.2	1.7	7.8
XZ009	申扎县	2020-01-18 11:00:00	0	0	0	0	0	0	0.1	0	0.3	0.4	0.4	0.4	0.5	0.5	1.4	0.6	0.7	1	0.9	1.3	1.3	1	1.5	0.9	0.4	0.6	0.7	0	1.8	2.2	1.7	7.8
XZ009	申扎县	2020-01-18 12:00:00	0	0	0	0	0	0	0.1	0	0.3	0.4	0.3	0.4	0.5	0.5	1.4	0.6	0.7	1.1	0.9	1.3	1.3	1	1.5	0.9	0.4	0.6	0.8	0	1.8	2.2	1.7	7.8
XZ009	申扎县	2020-01-18 13:00:00	0	0	0	0	0	0	0.1	0	0.2	0.4	0.3	0.4	0.5	0.5	1.4	0.6	0.7	1	0.9	1.3	1.3	1	1.5	0.9	0.4	0.6	0.8	0	1.8	2.2	1.7	7.8
XZ009	申扎县	2020-01-18 14:00:00	0	0	0	0	0	0	0.1	0	0.3	0.4	0.3	0.4	0.5	0.5	1.4	0.6	0.7	1	0.9	1.3	1.3	1	1.5	0.9	0.4	0.6	0.8	0	1.8	2.2	1.7	7.8
XZ009	申扎县	2020-01-18 15:00:00	0	0	0	0	0	0	0.1	0	0.3	0.4	0.3	0.4	0.5	0.5	1.3	0.6	0.7	1	0.9	1.3	1.3	1	1.5	0.9	0.4	0.6	0.8	0	1.8	2.2	1.7	7.8
XZ009	申扎县	2020-01-18 16:00:00	0	0	0	0	0	0	0.1	0	0.3	0.4	0.4	0.4	0.5	0.5	1.4	0.6	0.7	1	0.9	1.3	1.3	1	1.5	0.9	0.4	0.6	0.8	0	1.8	2.2	1.7	7.8
XZ009	申扎县	2020-01-18 17:00:00	0	0	0	0	0	0	0.1	0.1	0.3	0.4	0.4	0.4	0.5	0.5	1.4	0.6	0.7	1	0.9	1.3	1.3	1	1.5	0.9	0.4	0.6	0.8	0	1.8	2.2	1.7	7.8
XZ009	申扎县	2020-01-18 18:00:00	0	0	0	0	0	0	0.1	0.1	0.3	0.5	0.4	0.4	0.5	0.5	1.4	0.6	0.7	1	0.9	1.3	1.3	1	1.5	0.9	0.4	0.6	0.8	0	1.8	2.2	1.7	7.8
XZ009	申扎县	2020-01-18 19:00:00	0	0	0	0	0.1	0	0.1	0.1	0.3	0.5	0.4	0.5	0.5	0.5	1.4	0.6	0.7	1	0.9	1.3	1.2	1	1.5	0.9	0.4	0.6	0.8	0	1.8	2.2	1.7	7.8
XZ009	申扎县	2020-01-18 20:00:00	0	0	0	0	0	0	0.1	0.1	0.3	0.5	0.4	0.5	0.5	0.5	1.4	0.6	0.7	1	0.9	1.3	1.3	1	1.5	0.9	0.4	0.6	0.8	0	1.8	2.2	1.7	7.8
XZ009	申扎县	2020-01-18 21:00:00	0	0	0	0	0	0	0.1	0.1	0.4	0.5	0.4	0.5	0.5	0.5	1.4	0.6	0.7	1	0.9	1.3	1.3	1	1.5	0.9	0.4	0.6	0.8	0	1.8	2.2	1.7	7.8
XZ009	申扎县	2020-01-18 22:00:00	0	0	0	0	0	0	0.1	0.1	0.4	0.5	0.4	0.5	0.5	0.6	1.4	0.6	0.7	1	0.9	1.3	1.3	1	1.5	0.9	0.4	0.6	0.8	0	1.8	2.2	1.7	7.8
XZ009	申扎县	2020-01-18 23:00:00	0	0	0	0	0	0	0.1	0.1	0.3	0.5	0.4	0.5	0.5	0.6	1.4	0.6	0.7	1	0.9	1.3	1.3	1	1.5	0.9	0.4	0.6	0.8	0	1.8	2.2	1.7	7.8
XZ009	申扎县	2020-01-19 00:00:00	0	0	0	0	0	0	0.1	0.1	0.3	0.5	0.4	0.5	0.5	0.6	1.4	0.6	0.7	1	0.9	1.3	1.3	1	1.5	0.9	0.4	0.6	0.8	0	1.8	2.2	1.7	7.8
XZ009	申扎县	2020-01-19 01:00:00	0	0	0	0	0	0	0.1	0.1	0.3	0.5	0.4	0.5	0.5	0.6	1.4	0.6	0.7	1	0.9	1.3	1.3	1	1.5	0.9	0.4	0.6	0.8	0	1.8	2.2	1.7	7.8
XZ009	申扎县	2020-01-19 02:00:00	0	0	0	0	0	0	0.1	0.1	0.3	0.5	0.4	0.5	0.5	0.6	1.4	0.6	0.7	1	0.9	1.3	1.3	1	1.5	0.9	0.4	0.6	0.8	0	1.8	2.2	1.7	7.8
XZ009	申扎县	2020-01-19 03:00:00	0	0	0	0	0	0	0.1	0.1	0.3	0.5	0.4	0.5	0.5	0.6	1.4	0.6	0.7	1	0.9	1.3	1.3	1	1.5	0.9	0.4	0.6	0.8	0	1.8	2.2	1.7	7.8
XZ009	申扎县	2020-01-19 04:00:00	0	0	0	0	0	0	0.1	0.1	0.3	0.5	0.4	0.5	0.5	0.6	1.4	0.6	0.7	1	0.9	1.3	1.3	1	1.5	0.9	0.4	0.6	0.8	0	1.8	2.2	1.7	7.8
XZ009	申扎县	2020-01-19 05:00:00	0	0	0	0	0	0	0.1	0	0.3	0.5	0.4	0.5	0.5	0.5	1.4	0.6	0.7	1	0.9	1.3	1.3	1	1.5	0.9	0.4	0.6	0.8	0	1.8	2.2	1.7	7.8
XZ009	申扎县	2020-01-19 06:00:00	0	0	0	0	0	0	0.1	0	0.3	0.4	0.4	0.5	0.5	0.6	1.4	0.6	0.7	1	0.9	1.3	1.3	1	1.5	0.9	0.4	0.6	0.8	0	1.8	2.2	1.7	7.8
XZ009	申扎县	2020-01-19 07:00:00	0	0	0	0	0	0	0.1	0	0.3	0.4	0.4	0.5	0.5	0.5	1.4	0.6	0.7	1	0.9	1.3	1.3	1	1.5	0.9	0.4	0.6	0.8	0	1.8	2.2	1.7	7.8
XZ009	申扎县	2020-01-19 08:00:00	0	0	0	0	0	0	0	0	0.3	0.4	0.4	0.4	0.5	0.5	1.4	0.6	0.7	1	0.9	1.3	1.3	1	1.5	0.9	0.4	0.6	0.8	0	1.8	2.2	1.7	7.8
XZ009	申扎县	2020-01-19 09:00:00	0	0	0	0	0	0	0	0	0.2	0.4	0.3	0.4	0.5	0.5	1.4	0.6	0.7	1	0.9	1.3	1.3	1	1.5	0.9	0.4	0.6	0.8	0	1.8	2.2	1.7	7.7
XZ009	申扎县	2020-01-19 10:00:00	0	0	0	0	0	0	0	0	0.2	0.4	0.3	0.4	0.5	0.5	1.3	0.6	0.7	1.1	0.9	1.3	1.3	1	1.5	0.9	0.4	0.6	0.8	0	1.8	2.2	1.7	7.8
XZ009	申扎县	2020-01-19 11:00:00	0	0	0	0	0	0	0	0	0.2	0.4	0.3	0.4	0.5	0.5	1.3	0.6	0.7	1	0.9	1.3	1.3	1	1.5	0.9	0.4	0.6	0.8	0	1.8	2.2	1.7	7.8
XZ009	申扎县	2020-01-19 12:00:00	0	0	0	0	0	0	0	0	0.2	0.4	0.3	0.4	0.5	0.5	1.3	0.6	0.7	1	0.9	1.3	1.3	1	1.5	0.9	0.4	0.6	0.8	0	1.8	2.2	1.7	7.8
XZ009	申扎县	2020-01-19 13:00:00	0	0	0	0	0	0	0	0	0.2	0.3	0.3	0.4	0.5	0.5	1.3	0.6	0.7	1	0.9	1.3	1.3	1	1.5	0.9	0.4	0.6	0.8	0	1.8	2.2	1.7	7.8
XZ009	申扎县	2020-01-19 14:00:00	0	0	0	0	0	0	0	0	0.2	0.3	0.3	0.4	0.5	0.5	1.3	0.6	0.7	1.1	0.9	1.3	1.3	1	1.5	0.9	0.4	0.6	0.8	0	1.8	2.2	1.8	7.8
XZ009	申扎县	2020-01-19 15:00:00	0	0	0	0	0	0	0	0	0.2	0.4	0.3	0.4	0.5	0.5	1.3	0.6	0.7	1	0.9	1.3	1.3	1	1.5	0.9	0.4	0.6	0.8	0	1.8	2.2	1.7	7.8
XZ009	申扎县	2020-01-19 16:00:00	0	0	0	0	0	0	0.1	0	0.2	0.4	0.3	0.4	0.5	0.5	1.3	0.6	0.7	1	0.9	1.3	1.3	1	1.5	0.9	0.4	0.6	0.8	0	1.8	2.2	1.7	7.8
XZ009	申扎县	2020-01-19 17:00:00	0	0	0	0	0	0	0.1	0	0.3	0.4	0.3	0.4	0.5	0.5	1.3	0.6	0.7	1	0.9	1.3	1.3	1	1.5	0.9	0.4	0.6	0.8	0	1.8	2.2	1.8	7.8
XZ009	申扎县	2020-01-19 18:00:00	0	0	0	0	0	0	0.1	0	0.3	0.4	0.3	0.4	0.5	0.5	1.3	0.6	0.7	1	0.9	1.3	1.3	1	1.5	0.9	0.4	0.6	0.8	0	1.8	2.2	1.7	7.8
XZ009	申扎县	2020-01-19 19:00:00	0	0	0	0	0	0	0.1	0	0.3	0.4	0.3	0.4	0.5	0.5	1.3	0.6	0.7	1	0.9	1.3	1.2	1	1.5	0.9	0.4	0.6	0.8	0	1.8	2.2	1.7	7.8
XZ009	申扎县	2020-01-19 20:00:00	0	0	0	0	0	0	0.1	0.1	0.3	0.4	0.4	0.4	0.5	0.5	1.3	0.6	0.7	1	0.9	1.3	1.3	0.9	1.5	0.9	0.4	0.6	0.8	0	1.8	2.2	1.7	7.8
XZ009	申扎县	2020-01-19 21:00:00	0	0	0	0	0	0	0.1	0.1	0.3	0.4	0.4	0.4	0.5	0.5	1.3	0.6	0.7	1	0.9	1.3	1.3	1	1.5	0.9	0.4	0.6	0.8	0	1.8	2.2	1.7	7.8
XZ009	申扎县	2020-01-19 22:00:00	0	0	0	0	0	0	0.1	0	0.3	0.4	0.4	0.4	0.5	0.5	1.4	0.6	0.7	1	0.9	1.3	1.3	1	1.5	0.9	0.4	0.6	0.8	0	1.8	2.2	1.7	7.8
XZ009	申扎县	2020-01-19 23:00:00	0	0	0	0	0	0	0.1	0	0.3	0.4	0.4	0.4	0.5	0.5	1.3	0.6	0.7	1	0.9	1.3	1.3	1	1.5	0.9	0.4	0.6	0.8	0	1.8	2.2	1.7	7.8
XZ009	申扎县	2020-01-20 00:00:00	0	0	0	0	0	0	0.1	0	0.3	0.4	0.4	0.4	0.5	0.5	1.3	0.6	0.7	1	0.9	1.3	1.3	1	1.5	0.9	0.4	0.6	0.8	0	1.9	2.2	1.7	7.8
XZ009	申扎县	2020-01-20 01:00:00	0	0	0	0	0	0	0.1	0	0.3	0.4	0.4	0.4	0.5	0.5	1.3	0.6	0.7	1	0.9	1.3	1.3	1	1.5	0.9	0.4	0.6	0.8	0	1.8	2.2	1.7	7.8
XZ009	申扎县	2020-01-20 02:00:00	0	0	0	0	0	0	0.1	0	0.3	0.4	0.4	0.4	0.5	0.5	1.3	0.6	0.7	1	0.9	1.3	1.3	1	1.5	0.9	0.4	0.6	0.8	0	1.8	2.2	1.7	7.8
XZ009	申扎县	2020-01-20 03:00:00	0	0	0	0	0	0	0.1	0	0.3	0.4	0.3	0.4	0.5	0.5	1.3	0.6	0.7	1	0.9	1.3	1.3	1	1.5	0.9	0.4	0.6	0.8	0	1.8	2.2	1.7	7.8
XZ009	申扎县	2020-01-20 04:00:00	0	0	0	0	0	0	0	0	0.2	0.4	0.3	0.4	0.5	0.5	1.3	0.6	0.7	1	0.9	1.3	1.3	1	1.5	0.9	0.4	0.6	0.7	0	1.8	2.2	1.7	7.8
XZ009	申扎县	2020-01-20 05:00:00	0	0	0	0	0	0	0	0	0.2	0.4	0.3	0.4	0.5	0.5	1.3	0.6	0.7	1	0.9	1.3	1.3	1	1.5	0.9	0.4	0.6	0.7	0	1.8	2.2	1.7	7.8
XZ009	申扎县	2020-01-20 06:00:00	0	0	0	0	0	0	0	0	0.2	0.4	0.3	0.4	0.5	0.5	1.3	0.6	0.7	1	0.9	1.3	1.3	1	1.5	0.9	0.4	0.6	0.8	0	1.8	2.2	1.7	7.8
XZ009	申扎县	2020-01-20 07:00:00	0	0	0	0	0	0	0	0	0.2	0.4	0.3	0.4	0.5	0.5	1.3	0.6	0.7	1	0.9	1.3	1.3	1	1.5	0.9	0.4	0.6	0.7	0	1.8	2.2	1.7	7.8
XZ009	申扎县	2020-01-20 08:00:00	0	0	0	0	0	0	0	0	0.2	0.3	0.3	0.4	0.4	0.5	1.3	0.6	0.7	1	0.9	1.3	1.2	1	1.5	0.9	0.4	0.6	0.7	0	1.8	2.2	1.7	7.8
XZ009	申扎县	2020-01-20 09:00:00	0	0	0	0	0	0	0	0	0.2	0.3	0.3	0.4	0.4	0.5	1.3	0.6	0.7	1	0.9	1.3	1.3	1	1.5	0.9	0.4	0.6	0.7	0	1.8	2.2	1.7	7.8
XZ009	申扎县	2020-01-20 10:00:00	0	0	0	0	0	0	0	0	0.2	0.3	0.3	0.4	0.4	0.5	1.3	0.6	0.7	1	0.9	1.3	1.2	0.9	1.5	0.9	0.4	0.6	0.8	0	1.8	2.2	1.7	7.8
XZ009	申扎县	2020-01-20 11:00:00	0	0	0	0	0	0	0	0	0.2	0.3	0.3	0.4	0.4	0.5	1.3	0.6	0.6	1	0.9	1.2	1.2	0.9	1.5	0.9	0.4	0.6	0.8	0	1.8	2.2	1.7	7.8
XZ009	申扎县	2020-01-20 12:00:00	0	0	0	0	0	0	0	0	0.2	0.3	0.3	0.4	0.4	0.5	1.3	0.6	0.6	1	0.9	1.2	1.2	0.9	1.5	0.9	0.4	0.6	0.8	0	1.8	2.2	1.7	7.8
XZ009	申扎县	2020-01-20 13:00:00	0	0	0	0	0	0	0	0	0.2	0.3	0.3	0.4	0.4	0.5	1.3	0.6	0.6	1	0.9	1.2	1.2	0.9	1.5	0.9	0.4	0.6	0.7	0	1.8	2.2	1.7	7.8
XZ009	申扎县	2020-01-20 14:00:00	0	0	0	0	0	0	0	0	0.2	0.3	0.3	0.4	0.4	0.5	1.3	0.6	0.6	1	0.9	1.2	1.2	0.9	1.5	0.9	0.4	0.6	0.8	0	1.8	2.2	1.7	7.8
XZ009	申扎县	2020-01-20 15:00:00	0	0	0	0	0	0	0	0	0.2	0.3	0.3	0.4	0.4	0.5	1.3	0.6	0.6	1	0.9	1.2	1.2	0.9	1.5	0.9	0.4	0.6	0.7	0	1.8	2.2	1.7	7.8
XZ009	申扎县	2020-01-20 16:00:00	0	0	0	0	0	0	0	0	0.2	0.3	0.3	0.4	0.4	0.5	1.3	0.6	0.6	1	0.9	1.2	1.2	0.9	1.5	0.9	0.4	0.6	0.8	0	1.8	2.2	1.7	7.8
XZ009	申扎县	2020-01-20 17:00:00	0	0	0	0	0	0	0	0	0.2	0.3	0.3	0.4	0.4	0.5	1.3	0.6	0.6	1	0.9	1.2	1.2	0.9	1.5	0.9	0.4	0.6	0.7	0	1.8	2.2	1.7	7.8
XZ009	申扎县	2020-01-20 18:00:00	0	0	0	0	0	0	0.1	0	0.2	0.3	0.3	0.4	0.4	0.5	1.3	0.6	0.6	1	0.9	1.2	1.2	0.9	1.5	0.9	0.4	0.6	0.7	0	1.8	2.2	1.7	7.8
XZ009	申扎县	2020-01-20 19:00:00	0	0	0	0	0	0	0.1	0	0.2	0.4	0.3	0.4	0.4	0.5	1.3	0.6	0.6	1	0.9	1.2	1.2	0.9	1.4	0.9	0.4	0.5	0.7	0	1.8	2.2	1.7	7.8
XZ009	申扎县	2020-01-20 20:00:00	0	0	0	0	0	0	0.1	0	0.3	0.4	0.3	0.4	0.4	0.5	1.3	0.6	0.6	1	0.9	1.2	1.2	0.9	1.5	0.9	0.4	0.6	0.7	0	1.8	2.2	1.7	7.8
XZ009	申扎县	2020-01-20 21:00:00	0	0	0	0	0	0	0.1	0	0.3	0.4	0.3	0.4	0.4	0.5	1.3	0.6	0.6	1	0.9	1.2	1.2	0.9	1.5	0.9	0.4	0.5	0.7	0	1.8	2.2	1.7	7.8
XZ009	申扎县	2020-01-20 22:00:00	0	0	0	0	0	0	0.1	0	0.3	0.4	0.3	0.4	0.5	0.5	1.3	0.6	0.6	1	0.9	1.2	1.2	0.9	1.4	0.9	0.4	0.6	0.7	0	1.8	2.2	1.7	7.8
XZ009	申扎县	2020-01-20 23:00:00	0	0	0	0	0	0	0.1	0	0.3	0.4	0.3	0.4	0.5	0.5	1.3	0.6	0.6	1	0.9	1.2	1.2	0.9	1.4	0.9	0.4	0.5	0.7	0	1.8	2.2	1.7	7.8
XZ009	申扎县	2020-01-21 00:00:00	0	0	0	0	0	0	0.1	0	0.3	0.4	0.3	0.4	0.5	0.5	1.3	0.6	0.6	1	0.9	1.2	1.2	0.9	1.4	0.9	0.4	0.5	0.7	0	1.8	2.2	1.7	7.8
XZ009	申扎县	2020-01-21 01:00:00	0	0	0	0	0	0	0.1	0	0.2	0.4	0.3	0.4	0.5	0.5	1.3	0.6	0.6	1	0.9	1.2	1.2	0.9	1.5	0.9	0.4	0.5	0.7	0	1.8	2.2	1.7	7.8
XZ009	申扎县	2020-01-21 02:00:00	0	0	0	0	0	0	0	0	0.2	0.4	0.3	0.4	0.5	0.5	1.3	0.6	0.6	1	0.9	1.2	1.2	0.9	1.5	0.9	0.4	0.5	0.7	0	1.8	2.2	1.7	7.8
XZ009	申扎县	2020-01-21 03:00:00	0	0	0	0	0	0	0	0	0.2	0.4	0.3	0.4	0.4	0.5	1.3	0.6	0.6	1	0.9	1.2	1.2	0.9	1.4	0.9	0.4	0.5	0.7	0	1.8	2.2	1.7	7.8
XZ009	申扎县	2020-01-21 04:00:00	0	0	0	0	0	0	0	0	0.2	0.4	0.3	0.4	0.4	0.5	1.3	0.6	0.6	1	0.9	1.2	1.2	0.9	1.5	0.9	0.4	0.6	0.7	0	1.8	2.2	1.7	7.7
XZ009	申扎县	2020-01-21 05:00:00	0	0	0	0	0	0	0	0	0.2	0.3	0.3	0.4	0.4	0.5	1.3	0.6	0.6	1	0.9	1.2	1.2	0.9	1.5	0.9	0.4	0.5	0.7	0	1.8	2.2	1.7	7.8
XZ009	申扎县	2020-01-21 06:00:00	0	0	0	0	0	0	0	0	0.2	0.3	0.3	0.4	0.4	0.5	1.3	0.6	0.6	1	0.9	1.2	1.2	0.9	1.5	0.9	0.4	0.5	0.7	0	1.8	2.2	1.7	7.8
XZ009	申扎县	2020-01-21 07:00:00	0	0	0	0	0	0	0	0	0.2	0.3	0.3	0.4	0.4	0.5	1.3	0.6	0.6	1	0.9	1.2	1.2	0.9	1.4	0.9	0.4	0.5	0.7	0	1.8	2.2	1.7	7.7
XZ009	申扎县	2020-01-21 08:00:00	0	0	0	0	0	0	0	0	0.2	0.3	0.3	0.4	0.4	0.5	1.3	0.6	0.6	1	0.9	1.2	1.2	0.9	1.4	0.9	0.4	0.5	0.7	0	1.8	2.2	1.7	7.7
XZ009	申扎县	2020-01-21 09:00:00	0	0	0	0	0	0	0	0	0.2	0.3	0.3	0.4	0.4	0.5	1.3	0.6	0.6	1	0.9	1.2	1.2	0.9	1.4	0.9	0.4	0.5	0.7	0	1.8	2.2	1.7	7.7
XZ009	申扎县	2020-01-21 10:00:00	0	0	0	0	0	0	0	0	0.2	0.3	0.3	0.4	0.4	0.5	1.3	0.6	0.6	1	0.9	1.2	1.2	0.9	1.4	0.9	0.4	0.5	0.7	0	1.8	2.1	1.7	7.7
XZ009	申扎县	2020-01-21 11:00:00	0	0	0	0	0	0	0	0	0.2	0.3	0.3	0.4	0.4	0.5	1.3	0.5	0.6	1	0.9	1.2	1.2	0.9	1.4	0.9	0.4	0.5	0.7	0	1.8	2.2	1.7	7.8
XZ009	申扎县	2020-01-21 12:00:00	0	0	0	0	0	0	0	0	0.1	0.3	0.3	0.4	0.4	0.5	1.3	0.5	0.6	1	0.9	1.2	1.2	0.9	1.4	0.9	0.4	0.5	0.7	0	1.8	2.2	1.7	7.8
XZ009	申扎县	2020-01-21 13:00:00	0	0	0	0	0	0	0	0	0.2	0.3	0.3	0.3	0.4	0.5	1.3	0.5	0.6	1	0.9	1.2	1.2	0.9	1.4	0.9	0.4	0.6	0.7	0	1.8	2.2	1.7	7.8
XZ009	申扎县	2020-01-21 14:00:00	0	0	0	0	0	0	0	0	0.2	0.3	0.3	0.3	0.4	0.5	1.3	0.5	0.6	1	0.9	1.2	1.2	0.9	1.4	0.9	0.4	0.5	0.7	0	1.8	2.2	1.7	7.8
XZ009	申扎县	2020-01-21 15:00:00	0	0	0	0	0	0	0	0	0.2	0.3	0.3	0.3	0.4	0.4	1.3	0.5	0.6	1	0.8	1.2	1.2	0.9	1.4	0.9	0.4	0.5	0.7	0	1.8	2.1	1.7	7.8
XZ009	申扎县	2020-01-21 16:00:00	0	0	0	0	0	0	0	0	0.2	0.3	0.3	0.3	0.4	0.5	1.3	0.5	0.6	1	0.9	1.2	1.2	0.9	1.4	0.9	0.4	0.5	0.7	0	1.8	2.2	1.7	7.8
XZ009	申扎县	2020-01-21 17:00:00	0	0	0	0	0	0	0	0	0.2	0.3	0.3	0.4	0.4	0.5	1.3	0.5	0.6	1	0.8	1.2	1.2	0.9	1.4	0.9	0.4	0.6	0.7	0	1.8	2.2	1.7	7.8
XZ009	申扎县	2020-01-21 18:00:00	0	0	0	0	0	0	0	0	0.2	0.3	0.3	0.4	0.4	0.5	1.3	0.5	0.6	1	0.8	1.2	1.2	0.9	1.4	0.9	0.4	0.5	0.7	0	1.8	2.2	1.7	7.8
XZ009	申扎县	2020-01-21 19:00:00	0	0	0	0	0	0	0	0	0.2	0.3	0.3	0.4	0.4	0.5	1.3	0.5	0.6	1	0.9	1.2	1.2	0.9	1.4	0.9	0.4	0.6	0.7	0	1.8	2.1	1.7	7.7
XZ009	申扎县	2020-01-21 20:00:00	0	0	0	0	0	0	0	0	0.2	0.3	0.3	0.4	0.4	0.5	1.3	0.5	0.6	1	0.8	1.1	1.2	0.9	1.4	0.9	0.4	0.5	0.7	0	1.8	2.2	1.7	7.7
XZ009	申扎县	2020-01-21 21:00:00	0	0	0	0	0	0	0	0	0.2	0.3	0.3	0.4	0.4	0.5	1.3	0.5	0.6	0.9	0.9	1.2	1.2	0.9	1.4	0.9	0.4	0.5	0.7	0	1.8	2.1	1.7	7.7
XZ009	申扎县	2020-01-21 22:00:00	0	0	0	0	0	0	0	0	0.2	0.4	0.3	0.4	0.4	0.5	1.3	0.5	0.6	1	0.8	1.2	1.2	0.9	1.4	0.9	0.4	0.5	0.7	0	1.8	2.1	1.7	7.7
XZ009	申扎县	2020-01-21 23:00:00	0	0	0	0	0	0	0	0	0.2	0.4	0.3	0.4	0.4	0.5	1.3	0.5	0.6	1	0.9	1.2	1.2	0.9	1.4	0.9	0.4	0.5	0.7	0	1.8	2.1	1.7	7.7
XZ009	申扎县	2020-01-22 00:00:00	0	0	0	0	0	0	0	0	0.2	0.4	0.3	0.4	0.4	0.5	1.3	0.5	0.6	1	0.9	1.2	1.2	0.9	1.4	0.9	0.4	0.5	0.7	0	1.8	2.1	1.7	7.7
XZ009	申扎县	2020-01-22 01:00:00	0	0	0	0	0	0	0	0	0.2	0.3	0.3	0.4	0.4	0.5	1.3	0.5	0.6	1	0.9	1.1	1.2	0.9	1.4	0.9	0.4	0.5	0.7	0	1.8	2.1	1.7	7.7
XZ009	申扎县	2020-01-22 02:00:00	0	0	0	0	0	0	0	0	0.2	0.3	0.3	0.4	0.4	0.5	1.3	0.5	0.6	1	0.9	1.2	1.2	0.9	1.4	0.9	0.4	0.5	0.7	0	1.8	2.1	1.7	7.7
XZ009	申扎县	2020-01-22 03:00:00	0	0	0	0	0	0	0	0	0.2	0.3	0.3	0.4	0.4	0.5	1.3	0.5	0.6	1	0.9	1.2	1.2	0.9	1.4	0.9	0.4	0.5	0.7	0	1.8	2.1	1.6	7.7
XZ009	申扎县	2020-01-22 04:00:00	0	0	0	0	0	0	0	0	0.2	0.3	0.3	0.4	0.4	0.5	1.3	0.5	0.6	1	0.9	1.2	1.2	0.9	1.4	0.9	0.4	0.5	0.7	0	1.8	2.1	1.6	7.7
XZ009	申扎县	2020-01-22 05:00:00	0	0	0	0	0	0	0	0	0.2	0.3	0.3	0.4	0.4	0.5	1.3	0.5	0.6	1	0.8	1.2	1.2	0.9	1.4	0.9	0.4	0.5	0.7	0	1.8	2.1	1.6	7.7
XZ009	申扎县	2020-01-22 06:00:00	0	0	0	0	0	0	0	0	0.2	0.3	0.3	0.4	0.4	0.5	1.3	0.5	0.6	1	0.8	1.2	1.2	0.9	1.4	0.9	0.4	0.5	0.7	0	1.8	2.1	1.7	7.7
XZ009	申扎县	2020-01-22 07:00:00	0	0	0	0	0	0	0	0	0.2	0.3	0.3	0.4	0.4	0.5	1.3	0.5	0.6	1	0.9	1.2	1.2	0.9	1.4	0.9	0.4	0.5	0.7	0	1.8	2.1	1.7	7.7
XZ009	申扎县	2020-01-22 21:00:00	0	0	0	0	0	0	0.1	0	0.2	0.3	0.3	0.4	0.4	0.5	1.3	0.5	0.6	0.9	0.8	1.1	1.2	0.8	1.4	0.8	0.4	0.5	0.7	0	1.8	2.1	1.6	7.7
XZ009	申扎县	2020-01-22 22:00:00	0	0	0	0	0	0	0.1	0	0.2	0.4	0.3	0.4	0.4	0.5	1.3	0.5	0.6	0.9	0.8	1.1	1.2	0.8	1.4	0.8	0.4	0.5	0.7	0	1.8	2.1	1.6	7.7
XZ009	申扎县	2020-01-22 23:00:00	0	0	0	0	0	0	0	0	0.2	0.4	0.3	0.4	0.4	0.5	1.3	0.5	0.6	0.9	0.8	1.1	1.2	0.8	1.4	0.8	0.4	0.5	0.7	0	1.8	2.1	1.6	7.7
XZ009	申扎县	2020-01-23 00:00:00	0	0	0	0	0	0	0	0	0.2	0.4	0.3	0.4	0.4	0.5	1.3	0.5	0.6	0.9	0.8	1.1	1.2	0.8	1.4	0.8	0.4	0.5	0.7	0	1.8	2.1	1.6	7.7
XZ009	申扎县	2020-01-23 01:00:00	0	0	0	0	0	0	0	0	0.2	0.3	0.3	0.4	0.4	0.5	1.3	0.5	0.6	0.9	0.8	1.1	1.2	0.8	1.4	0.8	0.4	0.5	0.7	0	1.8	2.1	1.6	7.7
XZ009	申扎县	2020-01-23 02:00:00	0	0	0	0	0	0	0	0	0.2	0.3	0.3	0.4	0.4	0.5	1.3	0.5	0.6	0.9	0.8	1.1	1.2	0.8	1.4	0.8	0.4	0.5	0.7	0	1.8	2.1	1.6	7.7
XZ009	申扎县	2020-01-23 03:00:00	0	0	0	0	0	0	0	0	0.2	0.3	0.3	0.4	0.4	0.5	1.3	0.5	0.6	0.9	0.8	1.1	1.2	0.9	1.4	0.8	0.4	0.5	0.7	0	1.8	2.1	1.6	7.7
XZ009	申扎县	2020-01-23 04:00:00	0	0	0	0	0	0	0	0	0.2	0.3	0.3	0.4	0.4	0.5	1.3	0.5	0.6	0.9	0.8	1.1	1.2	0.9	1.4	0.8	0.4	0.5	0.7	0	1.8	2.1	1.6	7.7
XZ009	申扎县	2020-01-23 05:00:00	0	0	0	0	0	0	0	0	0.2	0.3	0.3	0.4	0.4	0.4	1.3	0.5	0.6	0.9	0.8	1.1	1.2	0.9	1.4	0.8	0.4	0.5	0.7	0	1.8	2.1	1.6	7.7
XZ009	申扎县	2020-01-23 06:00:00	0	0	0	0	0	0	0	0	0.2	0.3	0.3	0.4	0.4	0.5	1.3	0.5	0.6	0.9	0.9	1.1	1.2	0.9	1.4	0.8	0.4	0.5	0.7	0	1.7	2.1	1.6	7.7
XZ009	申扎县	2020-01-23 07:00:00	0	0	0	0	0	0	0	0	0.1	0.3	0.3	0.3	0.4	0.4	1.2	0.5	0.6	0.9	0.8	1.1	1.2	0.9	1.4	0.8	0.4	0.5	0.7	0	1.7	2.1	1.6	7.7
XZ009	申扎县	2020-01-23 08:00:00	0	0	0	0	0	0	0	0	0.1	0.3	0.3	0.3	0.4	0.4	1.2	0.5	0.6	0.9	0.8	1.1	1.2	0.9	1.4	0.8	0.4	0.5	0.7	0	1.8	2.1	1.6	7.7
XZ009	申扎县	2020-01-23 09:00:00	0	0	0	0	0	0	0	0	0.1	0.2	0.2	0.3	0.4	0.4	1.2	0.5	0.6	0.9	0.8	1.1	1.2	0.8	1.4	0.8	0.4	0.5	0.7	0	1.8	2.1	1.6	7.7
XZ009	申扎县	2020-01-23 10:00:00	0	0	0	0	0	0	0	0	0.1	0.2	0.2	0.3	0.4	0.4	1.2	0.5	0.6	0.9	0.8	1.1	1.2	0.8	1.4	0.8	0.4	0.5	0.7	0	1.8	2.1	1.6	7.7
XZ009	申扎县	2020-01-23 11:00:00	0	0	0	0	0	0	0	0	0.1	0.2	0.2	0.3	0.4	0.4	1.2	0.5	0.6	0.9	0.8	1.1	1.1	0.8	1.4	0.8	0.4	0.5	0.7	0	1.8	2.1	1.6	7.7
XZ009	申扎县	2020-01-23 12:00:00	0	0	0	0	0	0	0	0	0.1	0.2	0.2	0.3	0.4	0.4	1.2	0.5	0.6	0.9	0.8	1.1	1.2	0.8	1.4	0.8	0.4	0.5	0.7	0	1.8	2.1	1.6	7.7
XZ009	申扎县	2020-01-23 13:00:00	0	0	0	0	0	0	0	0	0.1	0.2	0.2	0.3	0.4	0.4	1.2	0.5	0.6	0.9	0.8	1.1	1.1	0.8	1.4	0.8	0.4	0.5	0.7	0	1.7	2.1	1.6	7.7
XZ009	申扎县	2020-01-23 14:00:00	0	0	0	0	0	0	0	0	0.1	0.2	0.2	0.3	0.3	0.4	1.2	0.5	0.6	0.9	0.8	1.1	1.1	0.8	1.3	0.8	0.4	0.5	0.7	0	1.8	2.1	1.6	7.7
XZ009	申扎县	2020-01-23 15:00:00	0	0	0	0	0	0	0	0	0.1	0.2	0.2	0.3	0.3	0.4	1.2	0.5	0.6	0.9	0.8	1.1	1.1	0.8	1.4	0.8	0.4	0.5	0.7	0	1.7	2.1	1.6	7.7
XZ009	申扎县	2020-01-23 16:00:00	0	0	0	0	0	0	0	0	0.1	0.2	0.2	0.3	0.3	0.4	1.2	0.5	0.6	0.9	0.8	1.1	1.1	0.8	1.4	0.8	0.4	0.5	0.7	0	1.7	2.1	1.6	7.7
XZ009	申扎县	2020-01-23 17:00:00	0	0	0	0	0	0	0	0	0.1	0.2	0.2	0.3	0.4	0.4	1.2	0.5	0.6	0.9	0.8	1.1	1.1	0.8	1.4	0.8	0.4	0.5	0.7	0	1.8	2.1	1.6	7.7
XZ009	申扎县	2020-01-23 18:00:00	0	0	0	0	0	0	0	0	0.2	0.3	0.2	0.3	0.4	0.4	1.2	0.5	0.6	0.9	0.8	1.1	1.1	0.8	1.4	0.8	0.4	0.5	0.7	0	1.8	2.1	1.6	7.7
XZ009	申扎县	2020-01-23 19:00:00	0	0	0	0	0	0	0	0	0.2	0.3	0.2	0.3	0.4	0.4	1.2	0.5	0.6	0.9	0.8	1.1	1.1	0.8	1.4	0.8	0.4	0.5	0.7	0	1.7	2.1	1.6	7.7
XZ009	申扎县	2020-01-23 20:00:00	0	0	0	0	0	0	0	0	0.2	0.3	0.3	0.3	0.4	0.4	1.2	0.5	0.6	0.9	0.8	1.1	1.1	0.8	1.3	0.8	0.3	0.5	0.7	0	1.7	2.1	1.6	7.7
XZ009	申扎县	2020-01-23 21:00:00	0	0	0	0	0	0	0	0	0.2	0.3	0.3	0.3	0.4	0.4	1.2	0.5	0.6	0.9	0.8	1.1	1.1	0.8	1.3	0.8	0.3	0.5	0.7	0	1.8	2.1	1.6	7.7
XZ009	申扎县	2020-01-23 22:00:00	0	0	0	0	0	0	0	0	0.2	0.3	0.3	0.3	0.4	0.4	1.2	0.5	0.6	0.9	0.8	1.1	1.1	0.8	1.3	0.8	0.3	0.5	0.7	0	1.7	2.1	1.6	7.7
XZ009	申扎县	2020-01-23 23:00:00	0	0	0	0	0	0	0	0	0.2	0.3	0.3	0.3	0.4	0.4	1.2	0.5	0.6	0.9	0.8	1.1	1.1	0.8	1.3	0.8	0.3	0.5	0.7	0	1.7	2.1	1.6	7.6
XZ009	申扎县	2020-01-24 00:00:00	0	0	0	0	0	0	0	0	0.2	0.3	0.3	0.3	0.4	0.4	1.2	0.5	0.6	0.9	0.8	1.1	1.1	0.8	1.3	0.8	0.3	0.5	0.7	0	1.7	2.1	1.6	7.6
XZ009	申扎县	2020-01-24 01:00:00	0	0	0	0	0	0	0	0	0.2	0.3	0.3	0.3	0.4	0.4	1.2	0.5	0.6	0.9	0.8	1.1	1.1	0.8	1.3	0.8	0.3	0.5	0.7	0	1.7	2.1	1.6	7.6
XZ009	申扎县	2020-01-24 02:00:00	0	0	0	0	0	0	0	0	0.1	0.3	0.3	0.3	0.4	0.4	1.2	0.5	0.6	0.9	0.8	1.1	1.1	0.8	1.3	0.8	0.3	0.5	0.7	0	1.7	2.1	1.6	7.6
XZ009	申扎县	2020-01-24 03:00:00	0	0	0	0	0	0	0	0	0.1	0.3	0.2	0.3	0.4	0.4	1.2	0.5	0.6	0.9	0.8	1.1	1.1	0.8	1.3	0.8	0.3	0.5	0.7	0	1.7	2.1	1.6	7.6
XZ009	申扎县	2020-01-24 04:00:00	0	0	0	0	0	0	0	0	0.1	0.2	0.2	0.3	0.4	0.4	1.2	0.5	0.6	0.9	0.8	1.1	1.1	0.8	1.3	0.8	0.3	0.5	0.7	0	1.7	2.1	1.6	7.6
XZ009	申扎县	2020-01-24 05:00:00	0	0	0	0	0	0	0	0	0.1	0.2	0.2	0.3	0.4	0.4	1.2	0.5	0.6	0.9	0.8	1.1	1.1	0.8	1.3	0.8	0.3	0.5	0.7	0	1.7	2.1	1.6	7.7
XZ009	申扎县	2020-01-24 06:00:00	0	0	0	0	0	0	0	0	0.1	0.2	0.2	0.3	0.4	0.4	1.2	0.5	0.6	0.9	0.8	1.1	1.1	0.8	1.3	0.8	0.3	0.5	0.7	0	1.7	2.1	1.6	7.6
XZ009	申扎县	2020-01-24 07:00:00	0	0	0	0	0	0	0	0	0.1	0.2	0.2	0.3	0.4	0.4	1.2	0.5	0.6	0.9	0.8	1.1	1.1	0.8	1.3	0.8	0.3	0.5	0.7	0	1.7	2.1	1.6	7.6
XZ009	申扎县	2020-01-24 08:00:00	0	0	0	0	0	0	0	0	0.1	0.2	0.2	0.3	0.3	0.4	1.2	0.5	0.6	0.9	0.8	1.1	1.1	0.8	1.3	0.8	0.3	0.5	0.7	0	1.7	2	1.6	7.6
XZ009	申扎县	2020-01-24 09:00:00	0	0	0	0	0	0	0	0	0.1	0.2	0.2	0.3	0.3	0.4	1.2	0.5	0.6	0.9	0.8	1	1.1	0.8	1.3	0.8	0.3	0.5	0.7	0	1.7	2.1	1.6	7.6
XZ009	申扎县	2020-01-24 10:00:00	0	0	0	0	0	0	0	0	0.1	0.2	0.2	0.3	0.3	0.4	1.2	0.5	0.6	0.9	0.8	1	1.1	0.8	1.3	0.8	0.3	0.5	0.7	0	1.7	2.1	1.6	7.6
XZ009	申扎县	2020-01-24 11:00:00	0	0	0	0	0	0	0	0	0.1	0.2	0.2	0.3	0.3	0.4	1.2	0.5	0.5	0.9	0.8	1	1.1	0.8	1.3	0.8	0.3	0.5	0.7	0	1.7	2.1	1.6	7.7
XZ009	申扎县	2020-01-24 12:00:00	0	0	0	0	0	0	0	0	0.1	0.2	0.2	0.3	0.3	0.4	1.2	0.5	0.5	0.9	0.8	1	1.1	0.8	1.3	0.8	0.3	0.5	0.7	0	1.7	2	1.6	7.6
XZ009	申扎县	2020-01-24 13:00:00	0	0	0	0	0	0	0	0	0.1	0.2	0.2	0.3	0.3	0.4	1.2	0.5	0.5	0.9	0.8	1	1.1	0.8	1.3	0.8	0.3	0.5	0.7	0	1.7	2	1.5	7.6
XZ009	申扎县	2020-01-24 14:00:00	0	0	0	0	0	0	0	0	0.1	0.2	0.2	0.3	0.3	0.4	1.2	0.5	0.5	0.9	0.8	1	1.1	0.8	1.3	0.8	0.3	0.5	0.7	0	1.7	2.1	1.5	7.6
XZ009	申扎县	2020-01-24 15:00:00	0	0	0	0	0	0	0	0	0.1	0.2	0.2	0.3	0.3	0.4	1.2	0.4	0.5	0.9	0.8	1	1.1	0.8	1.3	0.8	0.3	0.5	0.7	0	1.7	2	1.5	7.6
XZ009	申扎县	2020-01-24 16:00:00	0	0	0	0	0	0	0	0	0.1	0.2	0.2	0.3	0.3	0.4	1.2	0.4	0.5	0.9	0.8	1	1.1	0.8	1.3	0.8	0.3	0.5	0.7	0	1.7	2	1.5	7.6
XZ009	申扎县	2020-01-24 17:00:00	0	0	0	0	0	0	0	0	0.1	0.2	0.2	0.3	0.3	0.4	1.2	0.4	0.5	0.9	0.8	1	1.1	0.8	1.3	0.8	0.3	0.5	0.7	0	1.7	2	1.5	7.6
XZ009	申扎县	2020-01-24 18:00:00	0	0	0	0	0	0	0	0	0.1	0.2	0.2	0.3	0.3	0.4	1.2	0.4	0.5	0.9	0.8	1	1.1	0.8	1.3	0.8	0.3	0.5	0.7	0	1.7	2	1.5	7.6
XZ009	申扎县	2020-01-24 19:00:00	0	0	0	0	0	0	0	0	0.1	0.2	0.2	0.3	0.3	0.4	1.2	0.4	0.5	0.9	0.8	1	1.1	0.8	1.3	0.8	0.3	0.5	0.7	0	1.7	2	1.5	7.6
XZ009	申扎县	2020-01-24 20:00:00	0	0	0	0	0	0	0	0	0.1	0.2	0.2	0.3	0.3	0.4	1.2	0.4	0.5	0.8	0.8	1	1.1	0.7	1.3	0.8	0.3	0.5	0.7	0	1.7	2	1.5	7.6
XZ009	申扎县	2020-01-24 21:00:00	0	0	0	0	0	0	0	0	0.1	0.2	0.2	0.3	0.3	0.4	1.2	0.4	0.5	0.9	0.8	1	1.1	0.7	1.3	0.8	0.3	0.5	0.7	0	1.7	2	1.5	7.6
XZ009	申扎县	2020-01-24 22:00:00	0	0	0	0	0	0	0	0	0.1	0.2	0.2	0.3	0.3	0.4	1.2	0.4	0.5	0.9	0.8	1	1.1	0.7	1.3	0.8	0.3	0.5	0.7	0	1.7	2	1.5	7.6
XZ009	申扎县	2020-01-24 23:00:00	0	0	0	0	0	0	0	0	0.1	0.2	0.2	0.3	0.3	0.4	1.2	0.4	0.5	0.9	0.8	1	1.1	0.7	1.3	0.8	0.3	0.5	0.7	0	1.7	2	1.5	7.6
XZ009	申扎县	2020-01-25 00:00:00	0	0	0	0	0	0	0	0	0.1	0.2	0.2	0.3	0.3	0.4	1.2	0.5	0.5	0.9	0.8	1	1.1	0.8	1.3	0.8	0.3	0.5	0.7	0	1.7	2	1.5	7.6
XZ009	申扎县	2020-01-25 01:00:00	0	0	0	0	0	0	0	0	0.1	0.2	0.2	0.3	0.3	0.4	1.2	0.5	0.5	0.9	0.8	1	1.1	0.7	1.3	0.8	0.3	0.5	0.7	0	1.7	2	1.5	7.6
XZ009	申扎县	2020-01-25 02:00:00	0	0	0	0	0	0	0	0	0.1	0.2	0.2	0.3	0.3	0.4	1.2	0.5	0.5	0.9	0.8	1	1.1	0.7	1.3	0.8	0.3	0.5	0.7	0	1.7	2	1.5	7.6
XZ009	申扎县	2020-01-25 03:00:00	0	0	0	0	0	0	0	0	0.1	0.2	0.2	0.3	0.3	0.4	1.2	0.5	0.5	0.9	0.8	1	1.1	0.7	1.3	0.7	0.3	0.5	0.7	0	1.7	2	1.5	7.6
XZ009	申扎县	2020-01-25 04:00:00	0	0	0	0	0	0	0	0	0.1	0.2	0.2	0.3	0.3	0.4	1.2	0.5	0.5	0.9	0.8	1	1.1	0.7	1.3	0.8	0.3	0.5	0.7	0	1.7	2	1.5	7.6
XZ009	申扎县	2020-01-25 05:00:00	0	0	0	0	0	0	0	0	0.1	0.2	0.2	0.3	0.3	0.4	1.2	0.4	0.5	0.9	0.8	1	1.1	0.8	1.3	0.8	0.3	0.5	0.7	0	1.7	2	1.5	7.5
XZ009	申扎县	2020-01-25 06:00:00	0	0	0	0	0	0	0	0	0.1	0.2	0.2	0.3	0.3	0.4	1.2	0.4	0.5	0.9	0.8	1	1.1	0.8	1.3	0.8	0.3	0.5	0.7	0	1.7	2	1.5	7.5
XZ009	申扎县	2020-01-25 07:00:00	0	0	0	0	0	0	0	0	0.1	0.2	0.2	0.3	0.3	0.4	1.2	0.4	0.5	0.8	0.8	1	1.1	0.7	1.3	0.7	0.3	0.5	0.7	0	1.7	2	1.5	7.5
XZ009	申扎县	2020-01-25 08:00:00	0	0	0	0	0	0	0	0	0	0.2	0.2	0.2	0.3	0.4	1.2	0.4	0.5	0.8	0.8	1	1.1	0.7	1.3	0.7	0.3	0.5	0.7	0	1.7	2	1.5	7.5
XZ009	申扎县	2020-01-25 09:00:00	0	0	0	0	0	0	0	0	0	0.2	0.2	0.2	0.3	0.4	1.1	0.4	0.5	0.8	0.8	1	1.1	0.7	1.3	0.7	0.3	0.5	0.7	0	1.7	2	1.5	7.5
XZ009	申扎县	2020-01-25 10:00:00	0	0	0	0	0	0	0	0	0	0.1	0.2	0.2	0.3	0.3	1.1	0.4	0.5	0.9	0.8	1	1	0.7	1.3	0.7	0.3	0.5	0.7	0	1.7	2	1.5	7.5
XZ009	申扎县	2020-01-25 11:00:00	0	0	0	0	0	0	0	0	0	0.1	0.1	0.2	0.3	0.3	1.1	0.4	0.5	0.8	0.8	1	1	0.7	1.3	0.7	0.3	0.5	0.7	0	1.7	2	1.5	7.5
XZ009	申扎县	2020-01-25 12:00:00	0	0	0	0	0	0	0	0	0	0.1	0.1	0.2	0.3	0.3	1.1	0.4	0.5	0.8	0.7	1	1	0.7	1.3	0.7	0.3	0.5	0.7	0	1.7	2	1.5	7.5
XZ009	申扎县	2020-01-25 13:00:00	0	0	0	0	0	0	0	0	0	0.1	0.1	0.2	0.3	0.3	1.1	0.4	0.5	0.8	0.7	0.9	1	0.7	1.3	0.7	0.3	0.5	0.7	0	1.7	2	1.5	7.5
XZ009	申扎县	2020-01-25 14:00:00	0	0	0	0	0	0	0	0	0	0.1	0.1	0.2	0.3	0.3	1.1	0.4	0.5	0.8	0.7	0.9	1	0.7	1.2	0.7	0.3	0.5	0.7	0	1.7	2	1.5	7.5
XZ009	申扎县	2020-01-25 15:00:00	0	0	0	0	0	0	0	0	0	0.1	0.1	0.2	0.3	0.3	1.1	0.4	0.5	0.8	0.7	0.9	1	0.7	1.3	0.7	0.3	0.5	0.7	0	1.7	2	1.5	7.5
XZ009	申扎县	2020-01-25 16:00:00	0	0	0	0	0	0	0	0	0.1	0.1	0.1	0.2	0.3	0.3	1.1	0.4	0.5	0.8	0.7	0.9	1	0.7	1.2	0.7	0.3	0.5	0.7	0	1.7	2	1.5	7.5
XZ009	申扎县	2020-01-25 17:00:00	0	0	0	0	0	0	0	0	0.1	0.2	0.2	0.2	0.3	0.3	1.1	0.4	0.5	0.8	0.7	0.9	1	0.7	1.2	0.7	0.3	0.5	0.7	0	1.7	2	1.4	7.5
XZ009	申扎县	2020-01-25 18:00:00	0	0	0	0	0	0	0	0	0.1	0.2	0.2	0.2	0.3	0.3	1.1	0.4	0.5	0.8	0.7	0.9	1	0.7	1.2	0.7	0.3	0.5	0.7	0	1.7	2	1.5	7.5
XZ009	申扎县	2020-01-25 19:00:00	0	0	0	0	0	0	0	0	0.1	0.2	0.2	0.2	0.3	0.3	1.1	0.4	0.5	0.8	0.7	0.9	1	0.7	1.2	0.7	0.3	0.5	0.7	0	1.7	2	1.5	7.5
XZ009	申扎县	2020-01-25 20:00:00	0	0	0	0	0	0	0	0	0.2	0.2	0.2	0.3	0.3	0.3	1.1	0.4	0.5	0.8	0.7	0.9	1	0.7	1.2	0.7	0.3	0.5	0.7	0	1.7	2	1.4	7.5
XZ009	申扎县	2020-01-25 21:00:00	0	0	0	0	0	0	0	0	0.2	0.3	0.2	0.3	0.3	0.4	1.1	0.4	0.5	0.8	0.7	0.9	1	0.7	1.2	0.7	0.3	0.5	0.7	0	1.7	2	1.4	7.5
XZ009	申扎县	2020-01-25 22:00:00	0	0	0	0	0	0	0	0	0.2	0.3	0.2	0.3	0.3	0.4	1.1	0.4	0.5	0.8	0.7	0.9	1	0.7	1.2	0.7	0.3	0.5	0.7	0	1.7	1.9	1.4	7.5
XZ009	申扎县	2020-01-25 23:00:00	0	0	0	0	0	0	0	0	0.2	0.3	0.2	0.3	0.3	0.4	1.1	0.4	0.5	0.8	0.7	0.9	1	0.7	1.2	0.7	0.3	0.5	0.6	0	1.7	2	1.4	7.5
XZ009	申扎县	2020-01-26 00:00:00	0	0	0	0	0	0	0	0	0.2	0.3	0.2	0.3	0.3	0.4	1.1	0.4	0.5	0.8	0.7	0.9	1	0.7	1.2	0.7	0.3	0.5	0.6	0	1.6	1.9	1.4	7.5
XZ009	申扎县	2020-01-26 01:00:00	0	0	0	0	0	0	0	0	0.2	0.3	0.2	0.3	0.3	0.4	1.2	0.4	0.5	0.8	0.7	0.9	1	0.7	1.2	0.7	0.3	0.5	0.6	0	1.6	1.9	1.4	7.5
XZ009	申扎县	2020-01-26 02:00:00	0	0	0	0	0	0	0	0	0.2	0.3	0.2	0.3	0.3	0.4	1.2	0.4	0.5	0.8	0.7	0.9	1	0.7	1.2	0.7	0.3	0.5	0.6	0	1.6	1.9	1.4	7.5
XZ009	申扎县	2020-01-26 03:00:00	0	0	0	0	0	0	0	0	0.1	0.2	0.2	0.3	0.3	0.4	1.2	0.4	0.5	0.8	0.7	0.9	1	0.7	1.2	0.7	0.3	0.5	0.6	0	1.6	1.9	1.4	7.5
XZ009	申扎县	2020-01-26 04:00:00	0	0	0	0	0	0	0	0	0.1	0.2	0.2	0.3	0.3	0.4	1.2	0.4	0.5	0.8	0.7	0.9	1	0.7	1.2	0.7	0.3	0.5	0.6	0	1.6	1.9	1.4	7.5
XZ009	申扎县	2020-01-26 05:00:00	0	0	0	0	0	0	0	0	0.1	0.2	0.2	0.3	0.3	0.4	1.2	0.4	0.5	0.8	0.8	1	1	0.7	1.2	0.7	0.3	0.5	0.6	0	1.6	1.9	1.4	7.5
XZ009	申扎县	2020-01-26 06:00:00	0	0	0	0	0	0	0	0	0.1	0.2	0.2	0.3	0.3	0.4	1.2	0.4	0.5	0.8	0.7	1	1	0.7	1.2	0.7	0.3	0.5	0.7	0	1.6	1.9	1.4	7.5
XZ009	申扎县	2020-01-26 07:00:00	0	0	0	0	0	0	0	0	0.1	0.2	0.2	0.3	0.3	0.4	1.2	0.4	0.5	0.8	0.8	1	1	0.7	1.2	0.7	0.3	0.5	0.6	0	1.6	1.9	1.4	7.5
XZ009	申扎县	2020-01-26 08:00:00	0	0	0	0	0	0	0	0	0.1	0.2	0.2	0.3	0.3	0.4	1.2	0.4	0.5	0.8	0.8	1	1	0.7	1.2	0.7	0.3	0.5	0.6	0	1.6	1.9	1.4	7.5
XZ009	申扎县	2020-01-26 09:00:00	0	0	0	0	0	0	0	0	0.1	0.2	0.2	0.3	0.3	0.4	1.2	0.4	0.5	0.8	0.8	1	1	0.7	1.2	0.7	0.3	0.5	0.6	0	1.6	1.9	1.4	7.5
XZ009	申扎县	2020-01-26 10:00:00	0	0	0	0	0	0	0	0	0.1	0.2	0.2	0.3	0.3	0.4	1.2	0.4	0.5	0.8	0.7	1	1	0.7	1.2	0.7	0.3	0.5	0.7	0	1.6	1.9	1.4	7.5
XZ009	申扎县	2020-01-26 11:00:00	0	0	0	0	0	0	0	0	0.1	0.2	0.2	0.3	0.3	0.4	1.2	0.4	0.5	0.8	0.7	1	1	0.7	1.2	0.7	0.3	0.5	0.6	0	1.6	1.9	1.4	7.5
XZ009	申扎县	2020-01-26 12:00:00	0	0	0	0	0	0	0	0	0.1	0.2	0.2	0.3	0.3	0.4	1.2	0.4	0.5	0.8	0.7	1	1	0.7	1.2	0.7	0.3	0.5	0.6	0	1.6	1.9	1.4	7.5
XZ009	申扎县	2020-01-26 13:00:00	0	0	0	0	0	0	0	0	0.1	0.2	0.2	0.3	0.3	0.4	1.2	0.4	0.5	0.8	0.7	0.9	1	0.7	1.2	0.7	0.3	0.5	0.6	0	1.6	1.9	1.4	7.5
XZ009	申扎县	2020-01-26 14:00:00	0	0	0	0	0	0	0	0	0.1	0.2	0.2	0.3	0.3	0.4	1.2	0.4	0.5	0.8	0.7	1	1	0.7	1.2	0.7	0.3	0.5	0.6	0	1.6	1.9	1.4	7.5
XZ009	申扎县	2020-01-26 15:00:00	0	0	0	0	0	0	0	0	0.1	0.2	0.2	0.3	0.3	0.4	1.1	0.4	0.5	0.8	0.7	0.9	1	0.7	1.2	0.7	0.3	0.5	0.6	0	1.6	1.9	1.4	7.5
XZ009	申扎县	2020-01-26 16:00:00	0	0	0	0	0	0	0	0	0.1	0.2	0.2	0.3	0.3	0.4	1.1	0.4	0.5	0.8	0.8	0.9	1	0.7	1.2	0.7	0.3	0.5	0.6	0	1.6	1.9	1.4	7.5
XZ009	申扎县	2020-01-26 17:00:00	0	0	0	0	0	0	0	0	0.1	0.2	0.2	0.3	0.3	0.4	1.2	0.4	0.5	0.8	0.7	0.9	1	0.7	1.2	0.7	0.3	0.5	0.6	0	1.7	1.9	1.4	7.5
XZ009	申扎县	2020-01-26 18:00:00	0	0	0	0	0	0	0	0	0.2	0.3	0.2	0.3	0.3	0.4	1.2	0.4	0.5	0.8	0.7	0.9	1	0.7	1.2	0.7	0.3	0.5	0.6	0	1.6	1.9	1.4	7.5
XZ009	申扎县	2020-01-26 19:00:00	0	0	0	0	0	0	0	0	0.2	0.3	0.2	0.3	0.3	0.4	1.2	0.4	0.5	0.8	0.7	0.9	1	0.7	1.2	0.7	0.3	0.5	0.6	0	1.6	1.9	1.4	7.5
XZ009	申扎县	2020-01-26 20:00:00	0	0	0	0	0	0	0.1	0	0.2	0.3	0.3	0.3	0.4	0.4	1.2	0.4	0.5	0.8	0.7	0.9	1	0.7	1.2	0.7	0.3	0.5	0.6	0	1.6	1.9	1.4	7.5
XZ009	申扎县	2020-01-26 21:00:00	0	0	0	0	0	0	0.1	0	0.2	0.3	0.3	0.3	0.4	0.4	1.2	0.4	0.5	0.8	0.8	1	1	0.7	1.2	0.7	0.3	0.5	0.6	0	1.6	1.9	1.4	7.5
XZ009	申扎县	2020-01-26 22:00:00	0	0	0	0	0	0	0.1	0	0.2	0.3	0.3	0.3	0.4	0.4	1.2	0.4	0.5	0.8	0.8	1	1	0.7	1.2	0.7	0.3	0.5	0.6	0	1.6	1.9	1.4	7.5
XZ009	申扎县	2020-01-26 23:00:00	0	0	0	0	0	0	0	0	0.2	0.3	0.3	0.3	0.4	0.4	1.2	0.5	0.5	0.8	0.8	1	1	0.7	1.2	0.7	0.3	0.5	0.6	0	1.6	1.9	1.4	7.5
XZ009	申扎县	2020-01-27 00:00:00	0	0	0	0	0	0	0	0	0.2	0.3	0.3	0.3	0.4	0.4	1.2	0.5	0.5	0.8	0.8	1	1	0.7	1.2	0.7	0.3	0.5	0.6	0	1.6	1.9	1.4	7.5
XZ009	申扎县	2020-01-27 01:00:00	0	0	0	0	0	0	0	0	0.2	0.3	0.3	0.3	0.4	0.4	1.2	0.5	0.5	0.8	0.8	1	1.1	0.7	1.2	0.7	0.3	0.5	0.6	0	1.6	1.9	1.4	7.5
XZ009	申扎县	2020-01-27 02:00:00	0	0	0	0	0	0	0	0	0.2	0.3	0.3	0.3	0.4	0.4	1.2	0.5	0.5	0.8	0.8	1	1.1	0.7	1.2	0.7	0.3	0.5	0.6	0	1.6	1.9	1.4	7.4
XZ009	申扎县	2020-01-27 03:00:00	0	0	0	0	0	0	0	0	0.2	0.3	0.3	0.3	0.4	0.4	1.2	0.5	0.5	0.8	0.8	1	1.1	0.7	1.2	0.7	0.3	0.5	0.6	0	1.6	1.9	1.4	7.4
XZ009	申扎县	2020-01-27 04:00:00	0	0	0	0	0	0	0	0	0.2	0.3	0.3	0.3	0.4	0.4	1.2	0.5	0.5	0.9	0.8	1	1.1	0.7	1.2	0.7	0.3	0.5	0.6	0	1.6	1.9	1.4	7.4
XZ009	申扎县	2020-01-27 05:00:00	0	0	0	0	0	0	0	0	0.1	0.3	0.2	0.3	0.4	0.4	1.2	0.5	0.5	0.8	0.8	1	1.1	0.7	1.3	0.7	0.3	0.5	0.6	0	1.6	1.9	1.4	7.4
XZ009	申扎县	2020-01-27 06:00:00	0	0	0	0	0	0	0	0	0.1	0.2	0.2	0.3	0.4	0.4	1.2	0.5	0.5	0.9	0.8	1	1.1	0.7	1.2	0.7	0.3	0.5	0.6	0	1.6	1.9	1.4	7.4
XZ009	申扎县	2020-01-27 07:00:00	0	0	0	0	0	0	0	0	0.1	0.2	0.2	0.3	0.4	0.4	1.2	0.5	0.5	0.8	0.8	1	1.1	0.7	1.3	0.7	0.3	0.5	0.6	0	1.6	1.9	1.4	7.5
XZ009	申扎县	2020-01-27 08:00:00	0	0	0	0	0	0	0	0	0.1	0.2	0.2	0.3	0.3	0.4	1.2	0.5	0.5	0.8	0.8	1	1.1	0.7	1.3	0.7	0.3	0.5	0.6	0	1.6	1.9	1.4	7.5
XZ009	申扎县	2020-01-27 09:00:00	0	0	0	0	0	0	0	0	0.1	0.2	0.2	0.3	0.3	0.4	1.2	0.5	0.5	0.8	0.8	1	1.1	0.7	1.3	0.7	0.3	0.5	0.6	0	1.6	1.9	1.4	7.5
XZ009	申扎县	2020-01-27 10:00:00	0	0	0	0	0	0	0	0	0.1	0.2	0.2	0.3	0.3	0.4	1.2	0.5	0.5	0.9	0.8	1	1	0.7	1.3	0.7	0.3	0.5	0.7	0	1.7	1.9	1.4	7.5
XZ009	申扎县	2020-01-27 11:00:00	0	0	0	0	0	0	0	0	0.1	0.2	0.2	0.3	0.3	0.4	1.2	0.4	0.5	0.9	0.8	1	1.1	0.7	1.2	0.7	0.3	0.5	0.7	0	1.6	1.9	1.4	7.5
XZ009	申扎县	2020-01-27 12:00:00	0	0	0	0	0	0	0	0	0.1	0.2	0.2	0.3	0.3	0.4	1.2	0.4	0.5	0.8	0.8	1	1.1	0.7	1.2	0.7	0.3	0.5	0.7	0	1.7	1.9	1.4	7.5
XZ009	申扎县	2020-01-27 13:00:00	0	0	0	0	0	0	0	0	0.1	0.2	0.2	0.3	0.3	0.4	1.1	0.4	0.5	0.8	0.8	1	1	0.7	1.3	0.7	0.3	0.5	0.6	0	1.6	1.9	1.4	7.5
XZ009	申扎县	2020-01-27 14:00:00	0	0	0	0	0	0	0	0	0.1	0.2	0.2	0.2	0.3	0.4	1.2	0.4	0.5	0.8	0.8	1	1	0.7	1.3	0.7	0.3	0.5	0.7	0	1.6	1.9	1.4	7.5
XZ009	申扎县	2020-01-27 15:00:00	0	0	0	0	0	0	0	0	0.1	0.2	0.2	0.3	0.3	0.4	1.2	0.4	0.5	0.8	0.8	1	1	0.7	1.2	0.7	0.3	0.5	0.6	0	1.7	1.9	1.4	7.5
XZ009	申扎县	2020-01-27 16:00:00	0	0	0	0	0	0	0	0	0.1	0.2	0.2	0.3	0.3	0.4	1.1	0.4	0.5	0.8	0.7	0.9	1	0.7	1.2	0.7	0.3	0.5	0.6	0	1.6	1.9	1.4	7.5
XZ009	申扎县	2020-01-27 17:00:00	0	0	0	0	0	0	0	0	0.1	0.2	0.2	0.3	0.3	0.4	1.1	0.4	0.5	0.8	0.8	1	1	0.7	1.2	0.7	0.3	0.5	0.6	0	1.7	1.9	1.4	7.5
XZ009	申扎县	2020-01-27 18:00:00	0	0	0	0	0	0	0	0	0.1	0.2	0.2	0.3	0.3	0.4	1.2	0.4	0.5	0.8	0.7	0.9	1	0.7	1.2	0.7	0.3	0.5	0.7	0	1.7	1.9	1.4	7.5
XZ009	申扎县	2020-01-27 19:00:00	0	0	0	0	0	0	0	0	0.2	0.3	0.2	0.3	0.3	0.4	1.2	0.4	0.5	0.8	0.7	0.9	1	0.7	1.2	0.7	0.3	0.5	0.6	0	1.6	1.9	1.4	7.5
XZ009	申扎县	2020-01-27 20:00:00	0	0	0	0	0	0	0	0	0.2	0.3	0.2	0.3	0.3	0.4	1.2	0.4	0.5	0.8	0.7	0.9	1	0.7	1.2	0.7	0.3	0.5	0.6	0	1.6	1.9	1.4	7.4
XZ009	申扎县	2020-01-27 21:00:00	0	0	0	0	0	0	0	0	0.2	0.3	0.3	0.3	0.3	0.4	1.2	0.4	0.5	0.8	0.7	0.9	1	0.7	1.2	0.7	0.3	0.5	0.6	0	1.6	1.9	1.4	7.4
XZ009	申扎县	2020-01-27 22:00:00	0	0	0	0	0	0	0	0	0.2	0.3	0.3	0.3	0.3	0.4	1.2	0.4	0.5	0.8	0.8	0.9	1	0.7	1.2	0.7	0.3	0.5	0.6	0	1.6	1.9	1.4	7.5
XZ009	申扎县	2020-01-27 23:00:00	0	0	0	0	0	0	0	0	0.2	0.3	0.3	0.3	0.4	0.4	1.2	0.4	0.5	0.8	0.8	1	1	0.7	1.2	0.7	0.3	0.5	0.6	0	1.6	1.9	1.4	7.5
XZ009	申扎县	2020-01-28 00:00:00	0	0	0	0	0	0	0	0	0.2	0.3	0.3	0.3	0.4	0.4	1.2	0.5	0.5	0.8	0.8	1	1	0.7	1.2	0.7	0.3	0.5	0.6	0	1.6	1.9	1.4	7.5
XZ009	申扎县	2020-01-28 01:00:00	0	0	0	0	0	0	0	0	0.2	0.3	0.3	0.3	0.4	0.4	1.2	0.5	0.5	0.8	0.8	1	1	0.7	1.2	0.7	0.3	0.5	0.6	0	1.6	1.9	1.4	7.4
XZ009	申扎县	2020-01-28 02:00:00	0	0	0	0	0	0	0	0	0.2	0.3	0.3	0.3	0.4	0.4	1.2	0.5	0.5	0.8	0.8	1	1	0.7	1.2	0.7	0.3	0.5	0.6	0	1.6	1.9	1.4	7.4
XZ009	申扎县	2020-01-28 03:00:00	0	0	0	0	0	0	0	0	0.2	0.3	0.3	0.3	0.4	0.4	1.2	0.5	0.5	0.8	0.8	1	1	0.7	1.2	0.7	0.3	0.5	0.6	0	1.6	1.9	1.4	7.4
XZ009	申扎县	2020-01-28 04:00:00	0	0	0	0	0	0	0	0	0.2	0.3	0.2	0.3	0.4	0.4	1.2	0.5	0.5	0.8	0.8	1	1.1	0.7	1.2	0.7	0.3	0.5	0.6	0	1.6	1.9	1.4	7.4
XZ009	申扎县	2020-01-28 05:00:00	0	0	0	0	0	0	0	0	0.1	0.3	0.2	0.3	0.4	0.4	1.2	0.5	0.5	0.8	0.8	1	1.1	0.7	1.2	0.7	0.3	0.5	0.6	0	1.6	1.9	1.4	7.4
XZ009	申扎县	2020-01-28 06:00:00	0	0	0	0	0	0	0	0	0.1	0.2	0.2	0.3	0.3	0.4	1.2	0.5	0.5	0.8	0.8	1	1.1	0.7	1.2	0.7	0.3	0.5	0.6	0	1.6	1.9	1.4	7.4
XZ009	申扎县	2020-01-28 07:00:00	0	0	0	0	0	0	0	0	0.1	0.2	0.2	0.3	0.3	0.4	1.2	0.4	0.5	0.8	0.8	1	1.1	0.7	1.3	0.7	0.3	0.5	0.6	0	1.6	1.9	1.4	7.4
XZ009	申扎县	2020-01-28 08:00:00	0	0	0	0	0	0	0	0	0.1	0.2	0.2	0.3	0.3	0.4	1.2	0.4	0.5	0.8	0.8	1	1.1	0.7	1.2	0.7	0.3	0.5	0.6	0	1.6	1.9	1.4	7.4
XZ009	申扎县	2020-01-28 09:00:00	0	0	0	0	0	0	0	0	0.1	0.2	0.2	0.3	0.3	0.4	1.2	0.4	0.5	0.8	0.8	1	1.1	0.7	1.2	0.7	0.3	0.5	0.6	0	1.6	1.9	1.4	7.5
XZ009	申扎县	2020-01-28 10:00:00	0	0	0	0	0	0	0	0	0.1	0.2	0.2	0.3	0.3	0.4	1.2	0.4	0.5	0.9	0.7	1	1	0.7	1.2	0.7	0.3	0.5	0.6	0	1.6	1.9	1.4	7.5
XZ009	申扎县	2020-01-28 11:00:00	0	0	0	0	0	0	0	0	0.1	0.2	0.2	0.3	0.3	0.4	1.2	0.4	0.5	0.8	0.8	1	1	0.7	1.2	0.7	0.3	0.5	0.6	0	1.6	1.9	1.4	7.5
XZ009	申扎县	2020-01-28 12:00:00	0	0	0	0	0	0	0	0	0.1	0.2	0.2	0.3	0.3	0.4	1.2	0.4	0.5	0.8	0.8	1	1	0.7	1.2	0.7	0.3	0.5	0.6	0	1.6	1.9	1.4	7.5
XZ009	申扎县	2020-01-28 13:00:00	0	0	0	0	0	0	0	0	0.1	0.2	0.2	0.3	0.3	0.4	1.2	0.4	0.5	0.8	0.8	1	1	0.7	1.2	0.7	0.3	0.5	0.6	0	1.6	1.9	1.4	7.4
XZ009	申扎县	2020-01-28 14:00:00	0	0	0	0	0	0	0	0	0.1	0.2	0.2	0.3	0.3	0.4	1.1	0.4	0.5	0.8	0.8	1	1	0.7	1.2	0.7	0.3	0.5	0.6	0	1.6	1.9	1.4	7.4
XZ009	申扎县	2020-01-28 15:00:00	0	0	0	0	0	0	0	0	0.1	0.2	0.2	0.3	0.3	0.4	1.2	0.4	0.5	0.8	0.8	1	1	0.7	1.2	0.7	0.3	0.5	0.6	0	1.6	1.9	1.4	7.4
XZ009	申扎县	2020-01-28 16:00:00	0	0	0	0	0	0	0	0	0.1	0.2	0.2	0.3	0.3	0.4	1.2	0.4	0.5	0.8	0.8	1	1	0.7	1.2	0.7	0.3	0.5	0.6	0	1.6	1.9	1.4	7.4
XZ009	申扎县	2020-01-28 17:00:00	0	0	0	0	0	0	0	0	0.2	0.2	0.2	0.3	0.3	0.4	1.2	0.4	0.5	0.8	0.7	1	1	0.7	1.2	0.7	0.3	0.5	0.6	0	1.6	1.9	1.4	7.4
XZ009	申扎县	2020-01-28 18:00:00	0	0	0	0	0	0	0	0	0.2	0.3	0.2	0.3	0.3	0.4	1.2	0.4	0.5	0.8	0.7	1	1	0.7	1.2	0.7	0.3	0.5	0.6	0	1.6	1.9	1.4	7.4
XZ009	申扎县	2020-01-28 19:00:00	0	0	0	0	0	0	0	0	0.2	0.3	0.2	0.3	0.3	0.4	1.2	0.4	0.5	0.8	0.8	0.9	1	0.7	1.2	0.7	0.3	0.5	0.6	0	1.6	1.9	1.4	7.4
XZ009	申扎县	2020-01-28 20:00:00	0	0	0	0	0	0	0.1	0	0.2	0.3	0.3	0.3	0.4	0.4	1.2	0.4	0.5	0.8	0.8	1	1	0.7	1.2	0.7	0.3	0.5	0.6	0	1.6	1.9	1.4	7.4
XZ009	申扎县	2020-01-28 21:00:00	0	0	0	0	0	0	0.1	0	0.2	0.3	0.3	0.3	0.4	0.4	1.2	0.4	0.5	0.8	0.8	1	1	0.7	1.2	0.7	0.3	0.5	0.6	0	1.6	1.9	1.4	7.4
XZ009	申扎县	2020-01-28 22:00:00	0	0	0	0	0	0	0.1	0	0.2	0.3	0.3	0.3	0.4	0.4	1.2	0.5	0.5	0.8	0.8	1	1	0.7	1.2	0.7	0.3	0.5	0.6	0	1.6	1.9	1.4	7.4
XZ009	申扎县	2020-01-28 23:00:00	0	0	0	0	0	0	0.1	0	0.2	0.3	0.3	0.3	0.4	0.4	1.2	0.5	0.5	0.8	0.8	1	1.1	0.7	1.2	0.7	0.3	0.5	0.6	0	1.6	1.9	1.4	7.4
XZ009	申扎县	2020-01-29 00:00:00	0	0	0	0	0	0	0	0	0.2	0.3	0.3	0.4	0.4	0.4	1.2	0.5	0.5	0.8	0.8	1	1.1	0.7	1.2	0.7	0.3	0.5	0.6	0	1.6	1.9	1.4	7.4
XZ009	申扎县	2020-01-29 01:00:00	0	0	0	0	0	0	0	0	0.2	0.3	0.3	0.3	0.4	0.4	1.2	0.5	0.5	0.8	0.8	1	1.1	0.7	1.2	0.7	0.3	0.5	0.6	0	1.6	1.9	1.4	7.4
XZ009	申扎县	2020-01-29 02:00:00	0	0	0	0	0	0	0	0	0.2	0.3	0.3	0.4	0.4	0.4	1.2	0.5	0.5	0.8	0.8	1	1.1	0.7	1.2	0.7	0.3	0.5	0.6	0	1.6	1.9	1.4	7.4
[truncated: 14,471 more rows]
